# Supplementary material for: Genes involved in the induction of liver growth by peroxisome proliferators
Source: Royal Society of Chemistry journal article supplement (doi:10.1039/c3tx50110h), 2014-01-01
Supplement: c3tx50110h1.xlsx [file c3tx50110h1.xlsx]

## Sheet: all data
	Block	Row	Column	ID	Name	cipro 1h	cipro 3 h	cipro 5h	cpa 1h	cpa 3h	cpa 5h	fit2.F.p.value			5826 all
2354	1	74	18	mMC007046	Fxyd2-NM_7503-mMC007046	3.85527	0.428705	0.715816	0.0781624	-0.356458	0.212184	4.10159e-09
9850	4	8	26	mMC009911	5730453H04Rik-No acc-mMC009911	3.46309	-0.194926	-0.81141	0.86273	-0.216916	0.17783	0.00766477
13724	3	21	28	mMC021536	Igf1-NM_10512-mMC021536	3.38468	1.43541	0.220655	0.636091	0.623958	0.336326	0.00458826
17080	6	18	24	mMC011071	Olfr976-NM_146367-mMC011071	3.36731	0.0291945	0.937094	0.0979923	0.569851	-0.611306	3.03343e-05
10127	4	17	15	mMC010995	2400006N03Rik-XM_126152-mMC010995	3.3265	0.485237	0.980079	0.895736	-0.110622	0.390313	7.49399e-05
5705	2	79	9	mMC007642	Stk3-NM_19635-mMC007642	3.29875	0.663307	1.29747	0.442814	-0.0210034	0.481642	0.000106966
14222	5	37	14	mMC012772	1700112M01Rik-No acc-mMC012772	3.29199	-0.547191	0.543166	2.02245	-0.153604	0.589761	0.0307241
1747	1	55	19	mMC005085	E2f3-XM_127250-mMC005085	3.2396	-0.27065	-1.59419	1.86406	-0.378346	-0.469036	0.0386277
15366	5	73	6	mMC016249	Nrxn3-NM_172544-mMC016249	3.21829	0.103828	0.364906	1.71176	-0.0788017	0.499364	0.0381427
6218	2	95	10	mMC009154	9430025M21Rik-XM_355205-mMC009154	3.19289	2.85422	-0.70376	0.174582	0.250346	-0.563547	0.364697
15795	5	86	19	mMC017365	Ndrg1-NM_10884-mMC017365	3.18726	0.0292462	-1.12832	0.184572	0.65397	-0.349208	6.82926e-09
9197	3	88	13	mMC008252	Sstr4-NM_9219-mMC008252	3.18127	-0.161147	0.727109	1.4463	0.342953	-0.14294	0.00278702
8983	3	81	23	mMC007735	Ap1s1-NM_7457-mMC007735	3.1335	-0.318665	1.14211	0.850486	-0.285363	-0.121692	2.52891e-05
8302	3	60	14	mMC005492	4930425K24Rik-No acc-mMC005492	3.13014	-0.533268	0.377004	1.91656	-0.203892	-0.704764	0.0163994
17215	6	22	31	mMC011504	5033425B01Rik-No acc-mMC011504	3.11067	-0.361895	0.496479	1.01682	0.0207064	-0.748098	0.247965
9714	2	100	18	mMR029038	Tyms-NM_21288-mMR029038	3.0864	0.450886	0.34541	0.327852	-0.156516	0.754435	3.81092e-05
6247	2	96	7	mMC009114	Cpa5-NM_144537-mMC009114	3.08306	1.16377	-0.374715	0.461392	0.303661	-0.297055	0.000992533
10107	2	112	27	mMR030216	Zfp64-NM_9564-mMR030216	3.07077	0.246919	0.181198	0.410805	0.0743043	-0.0603684	0.00581376
7406	3	32	14	mMC002804	Cfh-NM_9888-mMC002804	3.05529	-0.342573	1.41958	0.969327	-0.536522	-0.325895	0.00166317
18269	6	55	29	mMC014460	5830432F11Rik-No acc-mMC014460	2.99461	-0.955656	-0.0383946	-0.00784589	0.3986	-1.27487	1.20873e-05
9846	2	104	22	mMR029398	Zfp180-NM_172483-mMR029398	2.9941	0.192155	0.73044	0.349361	-0.572576	-0.637087	2.18516e-06
9619	2	97	19	mMR028973	D430030K24Rik-NM_178732-mMR028973	2.99208	0.377056	1.26312	0.559319	-0.282709	-0.637811	2.2049e-05
18383	6	59	15	mMC014843	4930477O03Rik-No acc-mMC014843	2.98767	-0.927548	0.203833	1.99445	0.21771	-1.01588	0.00616661
2200	1	69	24	mMC006751	4930430O22Rik-No acc-mMC006751	2.96714	0.909143	0.835755	0.320435	-0.210782	0.793577	0.000481182
17144	6	20	24	mMC010895	4921511F01Rik-NM_27583-mMC010895	2.96123	0.183726	0.428887	0.402411	0.490594	-0.507219	0.0071166
13752	3	22	24	mMC021823	5033406O09Rik-No acc-mMC021823	2.93152	0.217136	-1.58862	-0.239805	0.0718713	-0.0357432	0.000384005
13797	5	24	5	mMC011393	Pdzk2-NM_133226-mMC011393	2.9204	-1.69054	0.27928	0.602611	-0.249987	-0.362825	0.00280528
9162	2	83	10	mMR027586	Mup2-NM_8647-mMR027586	2.91166	1.18055	0.610135	0.0488885	0.149297	-0.647112	0.162597
14373	3	42	5	mMC023761	D11Bwg0517e-No acc-mMC023761	2.90599	0.927054	0.840148	-0.0142013	0.0566906	-0.509154	6.58476e-05
8903	3	79	7	mMC007570	Cd68-NM_9853-mMC007570	2.90441	-0.182499	-0.0436528	0.24389	0.0789026	-0.27617	0.000107606
10064	4	15	16	mMC010411	Sema5a-NM_9154-mMC010411	2.89324	0.82019	2.2854	0.531809	0.19298	0.549229	6.29663e-06
17211	6	22	27	mMC011480	Nap1l1-NM_15781-mMC011480	2.89263	-0.799277	-0.0864961	-0.230642	-0.382545	-0.422597	0.17862
5596	2	75	28	mMC007240	Saa3-NM_11315-mMC007240	2.89109	2.71106	0.855364	-0.06798	0.662384	0.186988	4.63915e-06
17978	6	46	26	mMC013735	2600017J23Rik-NM_25566-mMC013735	2.86039	-0.16685	0.00786492	0.112505	0.0807224	-0.533274	0.0368633
2039	1	64	23	mMC006119	Clic1-NM_33444-mMC006119	2.85806	1.2409	-0.385243	0.402922	0.0274105	-0.192349	0.00810597
5404	2	69	28	mMC006656	Dpysl2-NM_9955-mMC006656	2.85492	0.783587	0.126999	0.561566	0.0434713	-0.758026	0.00784673
9293	3	91	13	mMC008724	Plp1-NM_11123-mMC008724	2.85379	0.449938	0.57212	0.891427	-0.0137837	-0.808455	9.98838e-05
19057	6	80	17	mMC016678	A130035F20-No acc-mMC016678	2.85221	-0.487394	-0.13285	0.203083	0.177064	-0.87107	3.30991e-05
16949	6	14	21	mMC010734	A430096B05Rik-XM_488307-mMC010734	2.84775	0.338776	-1.02152	0.287876	-0.0435745	-0.7653	0.36778
4323	2	36	3	mMC003333	Zmynd10-NM_53253-mMC003333	2.83304	1.20316	-0.496231	0.871542	0.401558	-0.973463	0.164421
15254	5	69	22	mMC015846	Otoa-NM_139310-mMC015846	2.82433	2.43032	1.54598	-0.93938	0.746064	-0.102176	2.40499e-05
16961	6	15	1	mMC010641	Kif9-NM_10628-mMC010641	2.82205	-0.2156	0.0772259	-0.0941786	0.267093	-0.0406779	1.35439e-07
17214	6	22	30	mMC011452	Letm1-NM_19694-mMC011452	2.82141	-0.585983	-0.339366	-0.311013	-0.0180152	-0.766922	0.134305
8224	3	57	32	mMC005384	Sepp1-NM_9155-mMC005384	2.81727	-0.258992	-1.16558	0.993667	-0.566022	1.10835	0.150237
2837	1	89	21	mMC008718	1500015A07Rik-No acc-mMC008718	2.8116	-0.699797	-0.44831	1.10937	-0.18118	-0.267856	0.0595655
10598	4	32	6	mMC012233	Dntt-NM_9345-mMC012233	2.78733	1.26567	1.34886	1.03886	0.741679	-0.810185	0.000134578
13676	5	20	12	mMC010963	4930413F20Rik-No acc-mMC010963	2.77392	0.379571	0.469738	0.543225	-0.0101999	0.983367	8.04882e-05
11259	4	52	27	mMC014184	1110007F12Rik-NM_197986-mMC014184	2.7737	0.090468	0.994202	0.16304	0.294579	0.477297	0.00021534
15210	5	68	10	mMC015594	Terf2-NM_9353-mMC015594	2.76494	0.022681	0.453528	0.306324	0.106243	0.380508	0.00261443
16890	6	12	26	mMC010103	BC026657-NM_29895-mMC010103	2.76351	-0.949927	-0.371305	0.0668452	-0.223165	-0.20949	0.000464676
16786	6	9	18	mMC010014	9130221J17Rik-No acc-mMC010014	2.76193	-0.51778	0.729939	-0.0428499	-0.215193	-0.963514	3.46622e-05
11994	2	171	26	mMO036015	mmu-miR-206.miRNA-Tagged-Template-No acc-mMO036015	2.75921	0.0892145	0.543122	0.845009	-0.143459	-0.559784	0.00134295
4300	2	35	12	mMC003371	8430428J23Rik-No acc-mMC003371	2.75705	0.35456	-0.00745368	0.39324	0.528026	-0.264706	0.371168
13968	3	29	16	mMC022299	2410015M20Rik-NM_153152-mMC022299	2.74475	0.584965	-0.180536	-0.287843	0.081968	0.0598189	6.41229e-06
10157	4	18	13	mMC010932	Cmklr1-NM_8153-mMC010932	2.74237	0.927929	0.638988	0.340366	0.571471	-0.269135	0.00798868
9818	4	7	26	mMC009623	B4galt7-NM_146045-mMC009623	2.73261	0.669999	1.33813	0.313678	0.120678	-0.17453	1.60511e-09
18172	6	52	28	mMC013968	Ppic-NM_8908-mMC013968	2.73211	-0.358238	0.324201	0.39144	-0.0503964	-0.734574	0.0612054
8278	3	59	22	mMC005582	1110055L24Rik-NM_25422-mMC005582	2.73186	0.0169255	0.279916	0.433637	-0.0164251	0.380693	0.0892816
2796	1	88	12	mMC008371	C230006B22Rik-No acc-mMC008371	2.72797	-0.148374	0.352086	0.0824676	0.0520189	-0.522669	0.0002187
2894	1	91	14	mMC008468	Plekha3-NM_31256-mMC008468	2.72515	0.277736	0.905747	0.895671	0.134006	0.201009	4.32587e-05
16707	6	7	3	mMC009853	Gdap1l1-NM_144891-mMC009853	2.72493	0.541127	0.534963	0.2112	0.2246	-0.270068	0.00107621
2911	1	91	31	mMC008544	Btbd9-NM_172618-mMC008544	2.72161	0.563436	0.782067	0.691814	-0.0498721	-0.390611	0.000196892
18806	6	72	22	mMC015862	Abcc2-NM_13806-mMC015862	2.71792	-0.0572239	-0.0271227	0.428906	0.107657	-0.877764	0.000130718
9938	2	107	18	mMR029894	Mup1-NM_31188-mMR029894	2.70649	1.49144	1.35667	-0.306623	-0.385251	1.16123	0.000674781
13352	5	10	8	mMC009994	Adamts2-NM_175643-mMC009994	2.70545	0.379282	1.37065	0.482603	0.24677	0.475843	1.04888e-06
8242	3	58	18	mMC005694	Ly64-NM_10739-mMC005694	2.7007	-0.479372	0.324261	-0.123971	0.0368919	-0.25712	0.00269799
2514	1	79	18	mMC007342	Txndc4-NM_29572-mMC007342	2.70011	0.470942	1.04506	0.307532	0.112519	0.355663	0.00543714
3158	1	99	22	mMC009238	Slc27a3-XM_130954-mMC009238	2.69391	-1.09229	-0.414368	0.513345	-0.32918	-0.327833	0.00145277
1528	1	48	24	mMC004559	Hap1-NM_10404-mMC004559	2.68864	0.451292	-1.84952	0.539454	-0.121609	-0.540947	0.0010669
16661	6	5	21	mMC009678	Alx4-NM_7442-mMC009678	2.67798	-0.613307	0.678955	0.0704504	-0.272725	-0.612253	4.2662e-05
2136	1	67	24	mMC006191	5830456J23Rik-No acc-mMC006191	2.67608	1.28522	1.79997	0.308689	0.115287	0.787494	3.52742e-05
10282	4	22	10	mMC011266	Mrgprb2-NM_175531-mMC011266	2.671	0.944652	1.66432	0.583551	-0.112332	0.902738	0.000514433
8131	3	55	3	mMC005245	A830031M15Rik-No acc-mMC005245	2.66089	1.18255	0.534	0.171262	0.258193	0.799455	0.0591432
3048	1	96	8	mMC009138	Was-NM_9515-mMC009138	2.66088	-0.0255793	-0.583891	1.20253	-0.198862	-0.1759	0.928305
13779	3	23	19	mMC021781	Rae1-NM_175112-mMC021781	2.65863	-0.0825727	0.171449	0.136712	0.0931494	-0.836693	0.000788335
2584	1	81	24	mMC007903	Chrna9-XM_132045-mMC007903	2.65756	1.74277	1.52798	0.614074	0.85589	0.0743534	0.0641982
5605	2	76	5	mMC007169	Cul7-XM_358324-mMC007169	2.65437	0.28132	-1.96694	0.232577	0.246084	0.0654798	0.341914
16982	6	15	22	mMC010574	Clecsf12-NM_20008-mMC010574	2.65298	0.600713	-0.225385	0.183109	-0.0264882	-0.91295	0.00213756
10280	2	118	8	mMR030730	AI314180-NM_172381-mMR030730	2.65157	0.553002	0.332253	-0.123853	-0.26883	-0.291361	0.0118435
14128	3	34	16	mMC022971	Hr-NM_21877-mMC022971	2.65011	1.28074	0.29359	-0.463803	0.089301	-0.154102	2.03418e-05
13760	3	22	32	mMC021800	5830445O15Rik-XM_485053-mMC021800	2.64551	1.12776	2.85933	0.651917	0.82724	0.163537	0.00358399
4863	2	52	31	mMC004896	E030041M21Rik-NM_29166-mMC004896	2.6452	-0.328127	-1.02363	0.626782	0.478519	-1.07771	0.0232186
3163	1	99	27	mMC009288	1700021F13Rik-No acc-mMC009288	2.64105	0.589244	0.138953	0.358629	-0.12835	0.314226	7.15428e-06
13671	5	20	7	mMC011034	AW124722-XM_139515-mMC011034	2.63093	0.515845	0.832535	-0.172797	0.209336	-0.355678	0.000810857
2710	1	85	22	mMC008262	2210013M04Rik-NM_178595-mMC008262	2.61771	0.827436	0.434723	0.183167	0.0107098	-0.889229	0.0001732
10045	4	14	29	mMC010524	4921539H07Rik-No acc-mMC010524	2.61545	-0.0743546	-1.97459	0.368318	-0.0902154	0.324175	0.020947
5887	2	84	31	mMC007968	Ttn-XM_130322-mMC007968	2.6077	1.10554	0.999945	-0.170271	-0.226862	-0.420222	0.000108054
13927	5	28	7	mMC011802	Litaf-NM_19980-mMC011802	2.60413	1.46401	1.86875	-0.391339	0.86287	-0.166786	2.12407e-06
6318	2	98	14	mMC009228	Ggta1-NM_10283-mMC009228	2.60381	0.644414	0.406226	0.287913	0.0247357	-0.793683	2.97779e-06
1660	1	52	28	mMC004944	9430098E02Rik-XM_134253-mMC004944	2.60246	0.651964	-1.47968	0.346108	0.00959124	-0.39332	0.768858
6348	2	99	12	mMC009515	Rgs7-NM_11880-mMC009515	2.60108	0.289161	0.858035	0.158792	-0.161298	-0.437825	1.01837e-05
16919	3	121	23	mMR031159	Slc39a9-XM_484158-mMR031159	2.59843	-0.185734	0.610444	0.961611	0.274009	-0.553246	0.000206243
2744	1	86	24	mMC008199	Zfp1-NM_11742-mMC008199	2.59435	0.0263634	0.285603	0.249618	0.0840707	-1.4033	0.000126356
2558	1	80	30	mMC007628	A830009L08Rik-No acc-mMC007628	2.59371	1.10568	1.36025	0.197874	0.496537	0.198643	0.00108706
13926	5	28	6	mMC011753	1190003J15Rik-XM_133915-mMC011753	2.59145	0.349828	0.690977	0.478914	0.0171044	0.190939	0.000331585
17882	6	43	26	mMC013263	Smu1-NM_21535-mMC013263	2.58871	-0.865297	0.255724	-0.468926	-0.194722	-0.597469	0.0107614
15861	3	88	21	mMR027838	Il11ra2-NM_10550-mMR027838	2.58639	-0.440037	0.634884	0.607466	-0.410442	-0.141647	0.021957
2962	1	93	18	mMC009054	Arhgef12-NM_27144-mMC009054	2.5854	0.382209	0.348185	0.47409	-0.135581	0.69462	0.00301401
5736	2	80	8	mMC007506	E230011A21Rik-NM_177091-mMC007506	2.5835	1.28655	1.79018	0.0634025	0.494814	-0.616405	3.40683e-07
17657	6	36	25	mMC012479	Kcnj10-NM_20269-mMC012479	2.58028	0.0833514	0.226947	0.44763	-0.0284884	-0.966246	0.0101376
7154	2	20	18	mMC021358	Hist1h2af-NM_175661-mMC021358	2.57971	2.39848	0.881598	-1.16176	0.355681	-0.504519	0.000122
17679	6	37	15	mMC012723	0610009H04Rik-NM_18854-mMC012723	2.57733	-0.150757	-0.712155	0.151465	0.108018	-0.617074	0.0309772
15829	5	87	21	mMC017654	A030010E16Rik-No acc-mMC017654	2.57682	-0.132242	-0.764443	-0.191148	-0.0307706	0.275754	1.15458e-05
6564	2	2	4	mMC019621	Samd7-XM_130828-mMC019621	2.57629	0.839746	0.202224	-0.276223	0.223407	-0.944125	0.000762875
2489	1	78	25	mMC007479	Mrpl34-NM_53162-mMC007479	2.57248	0.734367	0.0375437	0.267288	-0.12501	0.0583062	0.000475912
14006	5	30	22	mMC011918	Prdm13-XM_131309-mMC011918	2.5707	0.3217	-0.250558	0.0710254	0.00687928	0.165977	3.99381e-08
15181	5	67	13	mMC015732	Rims4-NM_183023-mMC015732	2.56754	0.733145	0.936668	0.801524	0.0654941	-0.0625769	0.000113826
2669	1	84	13	mMC008060	Zbtb7-NM_10731-mMC008060	2.56402	0.634771	1.03016	0.122076	-0.0610768	-0.152451	0.000111512
10046	4	14	30	mMC010500	Ssr1-NM_25965-mMC010500	2.56039	0.360263	0.494874	0.501237	0.0882534	0.0123224	0.0303545
7703	3	41	23	mMC003895	Fga-NM_10196-mMC003895	2.55687	1.43282	1.51741	-0.040235	-0.187958	0.554614	0.00193833
5922	2	86	2	mMC008073	Olfr1519-NM_146399-mMC008073	2.55262	1.32447	-0.232154	0.743024	-0.0618592	-0.13357	0.0485528
9328	3	92	16	mMC008587	Neu4-NM_173772-mMC008587	2.54971	-1.06716	0.381605	0.434808	-0.219688	-1.21052	0.0372877
10284	4	22	12	mMC011243	A930008G19Rik-NM_175268-mMC011243	2.54578	-0.246043	0.262634	0.240625	-0.0935453	-0.392221	0.00501913
18848	6	73	32	mMC016136	Ube2e3-NM_9454-mMC016136	2.54168	-0.404506	-0.749185	2.29449	0.352892	-0.0684136	0.344958
17112	6	19	24	mMC010983	6330412F12Rik-NM_16736-mMC010983	2.54073	-0.0666711	0.565474	0.168145	0.132185	-0.95465	9.77541e-05
5087	2	59	31	mMC005752	Stmn4-NM_19675-mMC005752	2.53689	1.01249	1.54234	-0.286835	0.413824	-0.999874	0.000130388
16791	6	9	23	mMC010039	Disp2-NM_170593-mMC010039	2.5334	0.699007	1.09249	0.452198	-0.254012	0.0270196	0.0586544
10186	2	115	10	mMR030658	Rrm2-NM_9104-mMR030658	2.53147	0.880875	0.488747	-0.241411	-0.0161192	-0.264158	0.000271734
17078	6	18	22	mMC011046	Cacna1g-NM_9783-mMC011046	2.52704	-0.810146	0.394968	-0.219232	0.364496	-0.738598	6.45225e-05
17109	6	19	21	mMC011030	Gli3-NM_8130-mMC011030	2.52599	-0.795054	0.882737	-0.00778482	-0.262362	-0.582129	0.00530013
10191	4	19	15	mMC010819	7420701I03Rik-No acc-mMC010819	2.52378	-0.437912	0.667977	0.223769	-0.0350004	0.424197	0.276249
17423	6	29	15	mMC011955	Dnmt3l-NM_19448-mMC011955	2.52325	1.87437	2.06803	-0.0503023	0.936278	0.552698	0.00674405
13748	5	22	20	mMC011149	2900011O08Rik-NM_144518-mMC011149	2.52062	0.781343	1.07801	0.0891994	-0.00374389	0.123971	1.34321e-06
6058	2	90	10	mMC008482	Agpat4-NM_26644-mMC008482	2.51169	0.2629	0.513086	0.376	-0.0158853	-0.644702	0.000144537
17082	6	18	26	mMC011047	Mmd-NM_26178-mMC011047	2.51044	-0.117037	-0.65475	0.706761	-0.343582	-0.121057	0.179959
13765	3	23	5	mMC021753	H2-Q7-NM_10394-mMC021753	2.51015	0.832742	0.428757	-1.01955	0.183856	-0.432638	3.7896e-05
9930	2	107	10	mMR029890	Hist1h2ag-NM_178186-mMR029890	2.50886	1.57054	0.408649	-0.208436	0.139438	-0.685399	0.00131105
9708	2	100	12	mMR029011	1110059E24Rik-NM_25423-mMR029011	2.50804	0.00925383	0.445109	0.205838	-0.322317	-0.474628	0.000160802
4358	2	37	6	mMC003577	4921511C16-NM_183307-mMC003577	2.506	0.641023	-0.330128	0.863099	0.16366	-0.578258	0.360686
11476	4	59	20	mMC014613	Suclg2-NM_11507-mMC014613	2.50474	0.485578	0.592023	1.00332	-0.20482	0.314481	0.00108745
17883	6	43	27	mMC013312	Narg2-NM_145618-mMC013312	2.50183	-0.719377	-0.966016	-0.422094	-0.0607009	-0.831461	0.172512
13803	5	24	11	mMC011419	D430040L24Rik-No acc-mMC011419	2.49562	1.01952	0.282949	0.279079	-0.160276	-0.515669	0.0570649
17273	6	24	25	mMC011327	1110058L19Rik-NM_26503-mMC011327	2.49508	0.236397	0.0399002	0.533819	0.529406	-1.09139	0.0519255
8306	3	60	18	mMC005518	Tmem19-NM_133683-mMC005518	2.49172	0.698459	0.699521	-0.548117	-0.00684254	0.350967	0.0096717
17549	6	33	13	mMC012364	Tmpit-NM_172541-mMC012364	2.49132	0.53325	0.217067	0.11997	0.297303	-0.483622	3.85784e-06
2392	1	75	24	mMC006959	4931428L18Rik-NM_27637-mMC006959	2.48655	-0.174939	0.414903	0.606286	-0.0872989	-0.0510053	0.0004086
13933	5	28	13	mMC011804	B130005I07Rik-No acc-mMC011804	2.48641	-1.28501	-1.76312	0.337248	0.232761	-0.189942	0.000378269
1756	1	55	28	mMC005040	Fn1-NM_10233-mMC005040	2.47996	1.96317	1.90611	0.255907	0.0347037	-1.42901	4.99779e-07
6156	2	93	12	mMC008931	Grap-NM_27817-mMC008931	2.47977	1.04675	1.4843	-0.113919	0.499512	-0.535022	0.000585967
14077	5	32	29	mMC012164	1110063F24Rik-NM_133889-mMC012164	2.47738	-1.16895	0.369645	-0.0575993	-0.149539	0.107278	0.000138827
13984	5	29	32	mMC012008	Dgkg-NM_138650-mMC012008	2.47568	0.98947	0.827082	0.2324	-0.128272	0.139902	0.00201434
2585	1	81	25	mMC007951	4930432J09Rik-No acc-mMC007951	2.4705	-0.125094	0.298876	0.147671	-0.224579	0.0480724	2.76834e-05
2957	1	93	13	mMC009100	Dgkz-NM_138306-mMC009100	2.46395	0.470264	1.04045	0.00419772	-0.087091	0.253829	2.47171e-06
13692	5	20	28	mMC010992	Ptgfr-NM_8966-mMC010992	2.46288	-0.296324	-1.47368	0.0075839	-0.193519	-0.58105	9.72001e-07
14847	5	56	31	mMC014496	2410016F19Rik-NM_26113-mMC014496	2.46229	0.389763	0.0983145	0.87653	0.238943	-0.711205	0.000105497
8695	2	68	23	mMC025991	2310045N01Rik-XM_486121-mMC025991	2.45754	0.749341	1.32325	0.405542	-0.0713607	0.489418	0.00657794
16679	3	114	7	mMR030698	Tcf20-NM_13836-mMR030698	2.45296	-0.231828	0.531901	0.720494	0.435319	-1.23856	0.00814187
13223	5	6	7	mMC009682	1700041I07Rik-No acc-mMC009682	2.45021	0.748198	0.96245	0.177886	-0.241598	0.186475	0.000874041
13354	5	10	10	mMC010018	BC023835-NM_172116-mMC010018	2.44885	-0.0205102	0.410175	0.182341	0.300232	-0.00510253	1.42576e-06
10122	4	17	10	mMC010970	Rspondin-NM_138683-mMC010970	2.44879	0.769065	1.25929	0.723389	0.247711	0.848455	0.0156253
17141	6	20	21	mMC010942	Polm-NM_17401-mMC010942	2.44854	-0.254585	-0.426003	-0.1283	0.0199582	-0.545006	0.000422724
13785	3	23	25	mMC021783	Prx-NM_19412-mMC021783	2.44851	-0.115853	-0.305707	0.15602	0.17012	-0.370457	0.0197765
13330	5	9	18	mMC010110	Pcsk4-NM_8793-mMC010110	2.44797	0.335738	0.927496	0.0863588	0.0498417	0.149067	4.53945e-07
9516	2	94	12	mMR028427	Arid1a-NM_33566-mMR028427	2.44725	0.92156	0.797687	0.152799	0.0944612	0.441136	0.00102449
2588	1	81	28	mMC007904	Cklfsf3-NM_24217-mMC007904	2.44653	0.644513	0.78141	0.298232	-0.113152	-0.127106	0.000131934
6300	2	97	28	mMC009344	A530001N23Rik-No acc-mMC009344	2.44643	0.487451	0.958865	0.362969	-0.111093	0.266091	0.0028888
2870	1	90	22	mMR028142	Tcra-V22.1-No acc-mMR028142	2.44575	0.737096	0.390975	0.145118	0.401291	0.202627	0.00372401
12056	2	173	24	mMO036223	IGKV12-44-AJ235955-mMO036223	2.4448	0.538932	0.809299	-0.321525	0.117204	-0.950645	0.00166004
10128	4	17	16	mMC010971	4833426J09Rik-No acc-mMC010971	2.44208	0.555707	0.984376	0.300948	-0.201904	0.00625449	0.000173896
6335	2	98	31	mMC009304	4930417G10Rik-XM_484109-mMC009304	2.43826	1.10316	1.1067	0.6627	0.130539	0.190067	0.350022
7276	3	28	12	mMC002419	9230118N01Rik-No acc-mMC002419	2.43716	-0.309122	-0.735839	0.153314	-0.158809	-0.406373	0.0802217
13739	5	22	11	mMC011219	Lrfn2-XM_128642-mMC011219	2.43677	0.397543	0.813626	0.0749566	-0.153422	-0.355311	0.00017997
4776	2	50	8	mMC004618	Syt12-NM_134164-mMC004618	2.43485	-0.144814	0.183615	0.398555	-0.0634283	-0.531447	2.92225e-05
11450	4	58	26	mMC014703	A630043P06-XM_488662-mMC014703	2.43281	0.0108491	0.555682	0.0736689	-0.138303	-0.748002	0.000533654
8150	3	55	22	mMC005198	Slc39a6-NM_139143-mMC005198	2.43279	-0.709438	0.954013	0.0896404	-0.19283	-0.519889	0.0434802
17275	6	24	27	mMC011304	2900024O10Rik-XM_487295-mMC011304	2.43109	-0.944721	0.0836229	-0.0444988	0.0608632	-0.610769	0.00223062
6160	2	93	16	mMC008955	E130102C15Rik-No acc-mMC008955	2.42219	0.295625	1.23224	-0.171684	-0.338309	-0.11971	0.0115258
6152	2	93	8	mMC008930	1700048F04Rik-No acc-mMC008930	2.42096	1.73881	1.52469	0.0249734	-0.0485051	-0.290976	0.00209373
5523	2	73	19	mMC007085	Cecr2-XM_489839-mMC007085	2.41949	1.00833	-0.224246	0.79046	0.123288	-0.201792	0.0318445
12127	4	79	31	mMC016608	D6Ertd253e-NM_178608-mMC016608	2.41824	0.230408	0.826339	0.677234	0.582722	0.71513	0.000126076
8339	3	61	19	mMC005837	Ak7-No acc-mMC005837	2.41667	-0.466596	-0.563857	-0.170248	0.197963	-1.53571	0.0201762
6147	2	93	3	mMC008981	A230050P20Rik-NM_175687-mMC008981	2.41561	0.932943	1.33283	0.245221	-0.0982073	-0.0170485	1.66027e-05
8935	3	80	7	mMC007482	4933412E12Rik-No acc-mMC007482	2.41412	0.542186	1.16583	0.234099	-0.0639799	0.225155	0.0128545
10058	4	15	10	mMC010410	Jam3-NM_23277-mMC010410	2.41348	0.143557	1.15239	0.583087	-0.159163	0.0360411	0.00182635
2421	1	76	21	mMC007294	Mppe1-NM_172630-mMC007294	2.41259	0.379832	1.20238	0.475232	0.0957719	0.042306	0.001196
5956	2	87	4	mMC008389	Tpx2-NM_28109-mMC008389	2.41251	0.483469	-2.49552	0.474387	-0.0467264	-0.207305	0.00395967
18329	6	57	25	mMC014671	Slc8a3-NM_80440-mMC014671	2.41182	-0.227884	0.0744576	0.21693	0.0588393	-0.693463	0.587279
2681	1	84	25	mMC008063	Xpo6-NM_28816-mMC008063	2.41032	-0.155974	-0.337679	0.882353	-0.152591	0.285983	0.0353532
5668	2	78	4	mMC007333	Ramp2-NM_19444-mMC007333	2.40042	1.82982	0.887256	0.768467	0.189694	-0.764358	2.65262e-06
1137	1	36	17	mMC003430	Col2a1-NM_31163-mMC003430	2.3988	1.65182	-0.199957	0.93758	0.516036	-1.77701	0.0264046
6379	2	100	11	mMC009499	6330411E07Rik-No acc-mMC009499	2.39879	0.275803	-1.19855	0.0253528	-0.062256	-0.197878	0.000528639
2765	1	87	13	mMC008156	4930412L05Rik-XM_489045-mMC008156	2.39041	0.0493941	1.31206	0.229316	0.228604	0.736997	0.00154752
9393	3	94	17	mMC009174	Ldb3-NM_11918-mMC009174	2.38919	-0.403754	0.596467	0.412711	0.62366	-1.2956	0.00387106
17752	6	39	24	mMC012903	2210009P08Rik-No acc-mMC012903	2.38913	-0.783356	-1.03643	-0.0886491	0.213471	-1.18047	0.0168912
7375	2	27	15	mMC022235	Zfp369-NM_178364-mMC022235	2.38895	1.55268	1.56947	0.178433	0.112286	-0.0540527	0.00142781
14603	5	49	11	mMC013995	E030034P13Rik-NM_153791-mMC013995	2.38597	2.00735	-0.179246	0.2026	0.56656	0.372554	0.000313807
7122	2	19	18	mMC021446	Mug1-NM_8645-mMC021446	2.38494	1.09566	1.94162	-1.02857	-0.0586384	2.16875	0.00352791
2771	1	87	19	mMC008157	4930528H21Rik-XM_149834-mMC008157	2.38263	-0.196431	0.965765	0.328006	-0.0431274	0.0100028	1.50686e-06
17015	6	16	23	mMC010535	A230071N21Rik-No acc-mMC010535	2.38155	0.32109	0.291522	0.243909	-0.158793	-0.669812	0.0758291
1797	1	57	5	mMC005617	R3hdm-NM_181750-mMC005617	2.38143	0.425134	0.471137	0.538496	-0.170015	0.149817	0.000127151
10100	4	16	20	mMC010677	2310015N21Rik-NM_181397-mMC010677	2.37981	0.38075	1.41512	0.647566	-0.165108	0.376438	8.79837e-05
13963	5	29	11	mMC012075	A930004J17Rik-No acc-mMC012075	2.3798	0.224313	0.685369	-0.0826384	-0.0623134	-0.0151673	9.04839e-07
5823	2	82	31	mMC007768	1700061J05Rik-XM_181371-mMC007768	2.3776	0.735697	0.490488	0.286687	0.0757269	-1.13317	0.0489727
4302	2	35	14	mMC003372	Gpr22-NM_175191-mMC003372	2.37683	0.577288	0.875597	-0.0680832	-0.0316078	-0.506069	0.00084605
9961	4	12	9	mMC010338	9230118O15Rik-NM_183127-mMC010338	2.37375	-0.0160657	1.92141	0.268918	-0.22853	1.25726	3.51291e-06
10446	4	27	14	mMC011540	Eppb9-NM_13717-mMC011540	2.37179	0.3716	2.22218	0.525674	0.0514061	0.847357	0.000227141
6369	2	100	1	mMC009497	Optn-NM_181848-mMC009497	2.37112	0.218076	1.0053	0.180885	0.30213	-0.379145	0.0124691
2550	1	80	22	mMC007606	C030033M12Rik-No acc-mMC007606	2.36511	0.619792	1.45856	0.215628	0.174089	-0.758593	0.00288822
5070	2	59	14	mMC005676	2310043D23Rik-No acc-mMC005676	2.36133	0.461108	1.34574	0.460502	-0.329101	-0.369493	0.0288699
14891	3	58	11	mMC025323	Hivep1-NM_7772-mMC025323	2.35916	0.827319	2.25501	-0.723847	0.00202324	0.132704	1.10096e-06
8330	3	61	10	mMC005786	Dazap1-NM_133188-mMC005786	2.35848	1.89169	0.976431	-0.0602477	-0.0666298	0.248976	1.36306e-06
5401	2	69	25	mMC006703	2310051M13Rik-NM_27344-mMC006703	2.35788	0.186711	-3.51955	0.613798	0.391595	-1.31367	0.0870176
7609	2	34	25	mMC022743	A130038L21Rik-NM_172588-mMC022743	2.35741	0.504508	0.969572	0.00990351	-0.029978	0.36068	0.0185638
10641	4	33	17	mMC012534	2700091N06Rik-NM_26028-mMC012534	2.35574	0.00660154	1.4813	-0.207365	-0.118129	-0.2341	2.64849e-06
7393	3	32	1	mMC002873	Slc10a1-NM_11387-mMC002873	2.35515	0.7274	0.123247	0.137572	-0.612631	0.317178	0.011102
6245	2	96	5	mMC009089	4930445E18Rik-No acc-mMC009089	2.35496	-2.02738	0.411926	0.318878	-0.0236233	-0.385418	4.5133e-06
5662	2	77	30	mMC007420	5033405K12Rik-NM_153567-mMC007420	2.35236	0.811045	1.04098	-0.077806	-0.297885	-0.564645	0.00379633
1282	1	41	2	mMC004033	4930578M01Rik-No acc-mMC004033	2.35161	1.08072	1.16955	0.502906	0.0789882	0.279033	6.28915e-05
2127	1	67	15	mMC006211	Fbxo44-NM_173401-mMC006211	2.34859	0.562624	1.12097	0.510776	-0.40809	0.139283	0.00881706
2060	1	65	12	mMC006339	B2m-NM_9735-mMC006339	2.34774	0.618889	1.13887	0.746696	-0.310319	2.00613	0.00356616
17781	6	40	21	mMC012862	Snx10-NM_28035-mMC012862	2.34696	-0.220238	0.235894	0.145921	0.00169457	-0.839606	0.0105332
15423	5	74	31	mMC016216	Rbpms-NM_19733-mMC016216	2.34593	0.418084	0.249559	-0.032816	-0.297562	-0.22455	3.66281e-07
15767	5	85	23	mMC017431	Ccdc3-XM_129987-mMC017431	2.34573	-0.0538131	-0.249117	0.570957	0.0661835	-0.574591	0.119325
9843	2	104	19	mMR029469	Hhip-NM_20259-mMR029469	2.34454	-0.512079	0.4774	0.461209	-0.421141	-0.240461	8.51088e-05
3032	1	95	24	mMC008879	Npy2r-NM_8731-mMC008879	2.34423	-0.00439057	0.988851	0.496604	-0.190658	-0.306274	7.0936e-09
12089	2	174	25	mMO036183	IGHV9S7-L14367-mMO036183	2.34415	-1.79095	0.140957	0.632677	-0.138452	-0.709704	0.847618
2556	1	80	28	mMC007632	5031434C07Rik-NM_177012-mMC007632	2.34223	0.832064	1.32669	-0.0351406	0.196246	0.118017	3.59499e-06
14446	5	44	14	mMC013268	6330408A02Rik-NM_177312-mMC013268	2.33933	-0.217124	1.25807	0.622543	0.301387	-0.307642	0.00944834
2777	1	87	25	mMC008159	Adamts20-NM_177431-mMC008159	2.33854	0.369643	1.28789	0.265902	-0.177711	-0.192293	3.93257e-06
9820	2	103	28	mMR029512	H2-Q1-NM_10390-mMR029512	2.33767	-0.463746	0.282771	0.525062	-0.0115362	-0.884322	0.000595925
14948	5	60	4	mMC014829	Foxo3-NM_19740-mMC014829	2.33735	1.30068	1.19569	0.016905	0.388761	0.342515	0.00456998
17743	6	39	15	mMC012923	Ly6g5c-NM_148947-mMC012923	2.33729	-0.511886	0.352927	0.186643	-0.145283	-0.846657	2.04143e-10
10074	2	111	26	mMR030255	Dysf-NM_21469-mMR030255	2.33684	-0.304412	0.247156	0.923195	-0.173055	-0.984219	0.0419394
5360	2	68	16	mMC006379	Aqp4-NM_9700-mMC006379	2.3362	0.152605	-1.53849	0.33823	-0.115757	-0.5332	0.000542505
2716	1	85	28	mMC008288	Fance-XM_283409-mMC008288	2.33437	0.0836209	0.663331	0.25616	0.292502	-0.185303	0.447182
10635	4	33	11	mMC012555	Hapln3-NM_178255-mMC012555	2.33214	-0.205051	1.21223	0.666652	0.435397	0.256142	0.00164743
3807	1	119	31	mMR030816	Rps6kb2-NM_21485-mMR030816	2.33157	0.654576	0.372287	0.0985364	-0.157036	0.680193	7.06331e-05
5321	2	67	9	mMC006490	6030468B19Rik-XM_126537-mMC006490	2.32866	0.825025	0.160835	-0.111173	-0.368977	0.178312	0.0011981
4447	2	39	31	mMC003832	Mgam-XM_133071-mMC003832	2.32814	-0.358231	0.938599	0.733233	-0.296333	-0.403458	0.143107
10074	4	15	26	mMC010391	Endog-NM_7931-mMC010391	2.328	0.121482	0.37914	0.245643	0.0847629	-0.305598	0.0110996
7200	2	21	32	mMC021608	Serpina3m-NM_9253-mMC021608	2.32636	1.33156	2.39356	-1.15636	1.12047	0.924804	0.000949534
7332	3	30	4	mMC003005	1600025M17Rik-XM_150405-mMC003005	2.32505	-1.22785	0.521663	-0.403593	0.414362	-0.555533	0.00510794
13668	5	20	4	mMC010989	Bag1-NM_9736-mMC010989	2.32358	0.838848	1.08552	-0.0793079	-0.250788	0.259911	3.60792e-05
2674	1	84	18	mMC008014	Uts2r-NM_145440-mMC008014	2.32248	0.884707	0.772136	0.343686	0.372446	-0.355381	0.0658462
17089	6	19	1	mMC011025	Lamr1-NM_11029-mMC011025	2.32239	0.0741403	-1.13749	0.0774922	-0.215157	-0.2819	0.010858
2708	1	85	20	mMC008261	C530024P05Rik-NM_177292-mMC008261	2.3223	-0.212438	0.931795	0.382273	-0.33637	0.1725	3.55375e-05
2267	1	71	27	mMC006600	3010031K01Rik-No acc-mMC006600	2.32189	1.75741	0.0349935	0.058379	0.0392988	-0.302056	0.00110188
7664	2	36	16	mMC022891	Ptprd-XM_131462-mMC022891	2.31907	0.719441	0.916166	-0.0957565	-0.156989	0.0640273	4.28857e-05
18676	6	68	20	mMC015477	Dnajb3-NM_8299-mMC015477	2.3183	-0.351851	0.20821	0.312659	0.103099	-0.589618	0.105848
8238	3	58	14	mMC005668	Pecam1-NM_8816-mMC005668	2.31829	0.658238	-0.853617	-0.221865	-0.220162	-0.689695	0.378442
2604	1	82	12	mMC007787	Fbp1-NM_19395-mMC007787	2.31738	0.886842	2.2707	0.0262509	0.11958	0.366459	6.75207e-05
18773	6	71	21	mMC016022	Rarg-NM_11244-mMC016022	2.31708	0.284824	-0.0998085	0.129749	0.0348079	-0.738893	0.0050227
10028	4	14	12	mMC010475	Gamt-NM_10255-mMC010475	2.31424	1.14033	2.03848	0.0763579	0.341185	0.877083	3.97029e-05
9767	4	6	7	mMC009778	Ing1l-NM_23503-mMC009778	2.30893	0.480365	0.727043	-0.221694	-0.12064	-0.445416	0.00395226
8299	3	60	11	mMC005563	9130227C08Rik-NM_27143-mMC005563	2.30807	0.186075	-0.714455	0.0620714	-0.123868	-0.485459	2.90661e-05
7063	3	21	23	mMC001975	4930456J16Rik-No acc-mMC001975	2.30793	-0.0701263	1.01917	-0.0367564	-0.139594	-0.363227	0.00852126
2646	1	83	22	mMC007702	4930435E12Rik-XM_358794-mMC007702	2.30787	-0.0303679	-0.997833	1.89029	-0.122608	0.0392195	0.395186
10580	4	31	20	mMC011925	C230007H23Rik-No acc-mMC011925	2.30622	-0.0339052	1.15664	0.516486	-0.201693	0.113275	0.0101877
14108	5	33	28	mMC012416	D10Ertd516e-XM_125901-mMC012416	2.30494	-0.675711	0.117292	-0.0153252	-0.365343	-0.131534	0.000117937
10151	4	18	7	mMC010930	1810063I02Rik-No acc-mMC010930	2.30223	0.548841	1.65706	0.132253	0.0104807	-0.348574	0.068633
13373	5	10	29	mMC010044	2310040M23Rik-No acc-mMC010044	2.30044	-0.0785249	-0.5797	0.0443063	-0.601354	-0.144509	0.000310855
17052	6	17	28	mMC010784	Lyzl4-NM_26915-mMC010784	2.29952	-0.0987661	0.243717	0.181845	-0.231289	-0.863188	0.193533
2973	1	93	29	mMC009076	1300019C06Rik-NM_25832-mMC009076	2.29946	0.170838	1.00542	0.418953	-0.402527	-0.429406	0.00261009
6362	2	99	26	mMC009519	Adcy4-NM_80435-mMC009519	2.29775	0.734168	0.80863	-0.115591	-0.159071	0.19204	3.21223e-05
17029	6	17	5	mMC010801	Ascc3l1-NM_177214-mMC010801	2.29654	0.793092	0.761198	0.0332474	0.281151	-1.04151	2.63457e-05
13666	5	20	2	mMC010961	Itpkb-XM_205854-mMC010961	2.29382	0.412036	-0.00360503	-0.00831675	0.0398872	0.344572	0.000283463
2297	1	72	25	mMC006911	2600001M11Rik-No acc-mMC006911	2.29375	-0.254497	0.192413	0.138187	-0.0209399	0.295863	0.0184686
18877	6	74	29	mMC016468	Prkra-NM_11871-mMC016468	2.29324	-0.0980766	-0.0423962	0.206673	-0.0251201	-0.642779	0.157011
10038	2	110	22	mMR029966	Cyp4a10-NM_10011-mMR029966	2.29228	0.38484	0.538974	0.237438	-0.233053	0.211618	0.00227768
17035	6	17	11	mMC010827	6720454L07Rik-No acc-mMC010827	2.29165	0.237269	0.624167	0.730632	-0.0577458	-0.435419	0.221086
7472	2	30	16	mMC022307	4921511C10Rik-No acc-mMC022307	2.29129	0.296422	0.349713	-0.187757	-0.382937	0.153607	7.99186e-05
18236	6	54	28	mMC014528	Rnf121-NM_29211-mMC014528	2.29102	-0.249604	-0.138873	0.245549	0.101983	-0.239519	0.481426
4052	2	27	20	mMC002605	Mapk14-NM_11951-mMC002605	2.29048	1.22849	-0.844657	1.14949	-0.306945	-0.597178	0.0890336
8964	3	81	4	mMC007709	AW210570-NM_25296-mMC007709	2.2903	0.543104	-0.289533	0.280565	0.0492007	-0.224052	0.214189
5489	2	72	17	mMC006790	Prodh2-NM_19546-mMC006790	2.29007	0.948613	0.03535	0.309355	0.260851	-0.632013	6.4003e-05
2546	1	80	18	mMC007630	Dok3-NM_13739-mMC007630	2.28752	0.604319	1.28301	0.143014	-0.163925	0.367048	5.33175e-06
10151	2	114	7	mMR030418	Cxcl12-NM_13655-mMR030418	2.28681	0.397611	0.226536	-0.167877	-0.473112	-0.341981	0.0195128
9950	2	107	30	mMR029892	Cdk10-NM_194444-mMR029892	2.28626	1.32951	1.69381	-0.14893	0.403549	-0.905159	3.06886e-06
10037	2	110	21	mMR030038	Tceb3bp1-NM_25852-mMR030038	2.28433	0.350453	0.394954	0.0621269	-0.226714	0.125971	0.000373005
7680	2	36	32	mMC022872	Prh1-NM_11174-mMC022872	2.28432	0.686129	0.200688	-1.10519	0.426268	-0.31765	0.0385453
10621	4	32	29	mMC012260	Lmtk2-XM_132499-mMC012260	2.28428	-0.378712	1.16645	0.353336	-0.0804402	-0.289909	0.00238227
9628	2	97	28	mMR028928	Mcf2l-NM_178076-mMR028928	2.28389	0.144406	0.98187	0.557022	0.731747	-0.955985	0.00552983
13538	5	16	2	mMC010577	Scd1-NM_9127-mMC010577	2.2811	-0.785863	-0.731954	0.591041	-0.326705	2.20581	3.59395e-08
15332	5	72	4	mMC015981	A130007F10Rik-NM_175539-mMC015981	2.28051	-0.937504	0.16219	0.180836	-0.0403311	-0.134208	0.0014095
17673	6	37	9	mMC012722	Olfr157-NM_19475-mMC012722	2.28042	0.56317	0.622039	0.0848088	-0.118698	-0.369767	0.000395776
15079	5	64	7	mMC015258	Rab11a-NM_17382-mMC015258	2.2803	1.04991	0.367859	0.589995	0.502035	-0.0149486	0.0172074
17646	6	36	14	mMC012404	Gzmf-NM_10374-mMC012404	2.27991	-0.44688	-0.946179	0.0577341	0.0592026	-0.731892	0.279542
15262	5	69	30	mMC015868	1110003P22Rik-NM_144522-mMC015868	2.27908	-0.175247	-0.235969	-0.0101593	0.125834	-0.555701	0.000750739
14908	3	58	28	mMC025280	Aldh3b1-NM_26316-mMC025280	2.27905	1.18233	1.07625	0.248031	0.0813706	0.501219	0.112195
14542	5	47	14	mMC013740	4930579D09Rik-No acc-mMC013740	2.27697	0.73078	1.30861	-0.0304911	0.107196	-0.0258068	2.92569e-07
14800	3	55	16	mMC024803	5730421K10Rik-No acc-mMC024803	2.27439	-0.464946	1.06806	-0.772517	-0.33837	-0.566282	0.00150099
18283	6	56	11	mMC014395	Zfp367-NM_175494-mMC014395	2.27179	0.709702	-0.233719	1.13029	1.06134	-1.27008	0.0922759
8006	3	51	6	mMC004833	Gsto1-NM_10362-mMC004833	2.27084	0.880155	0.754529	0.500271	-0.274973	-0.112778	0.0951263
2265	1	71	25	mMC006623	Galnt2-NM_139272-mMC006623	2.27077	0.0397259	-0.0322348	0.807795	-0.219397	0.0825577	0.326122
5908	2	85	20	mMC008165	2900001G08Rik-No acc-mMC008165	2.26916	0.608996	1.65538	-0.762201	0.236089	-0.161892	0.102197
1453	1	46	13	mMC004404	Zfp162-NM_11750-mMC004404	2.26867	0.588656	0.279491	0.708126	-0.219697	-0.112023	0.0174437
6053	2	90	5	mMC008505	1600002K03Rik-XM_354548-mMC008505	2.26521	-0.0587742	-2.44871	-0.0306532	0.362473	-0.518409	2.16645e-06
4236	2	33	12	mMC003171	Set7-NM_80793-mMC003171	2.2645	-0.171696	-1.04315	0.483129	-0.551968	-0.508141	0.0252241
2855	1	90	7	mMC008626	2610510H03Rik-NM_26620-mMC008626	2.26289	-0.0315629	0.294858	-0.240926	-0.153264	-0.183181	0.0072651
14985	3	61	9	mMC025394	Adam28-NM_10082-mMC025394	2.26083	-0.138438	-0.0312575	0.043862	0.612275	-0.309182	0.0418966
13573	5	17	5	mMC010897	Ipo4-NM_24267-mMC010897	2.25926	0.740025	1.10054	0.0769808	0.586776	-0.188393	0.0129999
13233	3	6	17	mMC020310	Tdo2-NM_19911-mMC020310	2.25717	1.66887	0.58389	0.320327	0.177873	0.852889	0.00130255
5608	2	76	8	mMC007122	AI481316-No acc-mMC007122	2.25486	0.795035	-0.0401915	0.362531	1.04422	-0.163572	0.00113665
7497	3	35	9	mMC003322	AI844366-NM_177906-mMC003322	2.25357	-0.381416	-0.12248	0.438352	-0.540718	-0.218709	0.139967
10387	4	25	19	mMC011789	Llglh2-NM_145438-mMC011789	2.25234	-0.208711	0.37961	0.340344	-0.166841	0.165271	0.00823074
16924	6	13	28	mMC010400	Clstn2-NM_22319-mMC010400	2.25173	-0.596784	-0.66909	0.871949	-0.136042	-0.745808	0.141729
13860	5	26	4	mMC011557	2410004H02Rik-NM_145954-mMC011557	2.25117	0.705069	0.893795	0.0345295	-0.0657295	0.149516	0.00133791
17814	6	41	22	mMC013062	Psmb8-NM_10724-mMC013062	2.24995	0.0399314	0.330306	0.0773466	0.264475	-0.534613	0.0353929
5857	2	84	1	mMC007961	Ogfr-NM_31373-mMC007961	2.2493	2.94832	0.202544	0.20523	-0.244084	0.0755585	6.13536e-09
7473	2	30	17	mMC022334	BC034834-NM_1001446-mMC022334	2.24779	0.926111	0.287013	-0.122164	-0.155259	0.63477	0.00130422
17651	6	36	19	mMC012477	Rfrp-NM_21892-mMC012477	2.24662	-0.0965354	0.151891	0.50349	-0.0522633	-0.477211	0.00688901
1227	1	39	11	mMC003547	Plxnb1-NM_172775-mMC003547	2.24583	0.188918	-0.424071	0.928704	-0.0763189	0.239603	0.00197482
15004	5	61	28	mMC015104	Tcp1-NM_13686-mMC015104	2.2454	0.45474	1.52872	0.477022	-0.447715	0.326238	4.48244e-06
9666	2	99	2	mMR029097	Mug1-NM_8645-mMR029097	2.24374	1.31031	2.76399	-1.07287	-0.807944	2.47098	0.000272899
15268	5	70	4	mMC015781	Krtap6-3-No acc-mMC015781	2.24361	0.0285921	-0.244533	0.0458729	0.336431	0.0720141	0.000529409
16763	6	8	27	mMC009768	Myo1d-NM_177390-mMC009768	2.24273	-0.206607	-0.0971775	-0.175062	0.150171	-0.750419	0.12017
5693	2	78	29	mMC007356	Sec14l1-NM_28777-mMC007356	2.24261	0.413621	0.959411	0.137175	-0.260974	-0.253606	0.00275004
10407	2	122	7	mMR031186	Lrch4-NM_146164-mMR031186	2.24103	1.21038	0.734955	-0.593873	0.35946	0.276323	0.033518
7431	3	33	7	mMC003146	4930405E02Rik-No acc-mMC003146	2.24046	-0.332134	-3.70478	-0.282143	-0.186671	0.1761	1.07704e-06
16803	6	10	3	mMC010325	BC023754-XM_148895-mMC010325	2.24024	1.06949	-0.341679	0.145533	-0.0179766	-0.98722	0.00148289
4005	2	26	5	mMC002361	4930430F08Rik-NM_175128-mMC002361	2.23998	0.391246	-0.566725	0.609042	0.0152036	-0.693108	0.554263
14318	3	40	14	mMC023156	Olfr318-NM_146501-mMC023156	2.23989	-0.175257	0.367121	-0.185467	-0.197616	-0.224338	0.00111503
10266	2	117	26	mMR030823	Fgf18-NM_8005-mMR030823	2.23936	0.796012	1.12611	0.419054	-0.174312	-0.501019	8.29782e-05
6960	2	14	16	mMC020771	1110014K08Rik-NM_176902-mMC020771	2.23816	0.394797	0.81815	-0.738999	-0.276911	-0.209276	0.00802276
14191	5	36	15	mMC012547	Tbx21-NM_19507-mMC012547	2.23599	1.30114	0.9561	0.333914	0.118471	-0.464514	0.000469882
16983	6	15	23	mMC010623	Sema6c-NM_11351-mMC010623	2.2341	-0.245988	0.204152	-0.0969447	0.199847	-1.02718	1.54604e-05
7752	3	43	8	mMC004042	5730511K23Rik-NM_19458-mMC004042	2.23185	-0.585571	-0.610861	-0.104148	-0.400951	-0.6774	0.0549687
7428	3	33	4	mMC003101	E230031K19-NM_172786-mMC003101	2.23155	-0.100491	-0.233651	0.0243463	-0.242603	-0.449493	0.0465695
2590	1	81	30	mMC007900	E330032C10-XM_488836-mMC007900	2.23055	0.165014	0.969899	0.166998	0.431688	0.084681	0.0044826
15055	5	63	15	mMC015323	Egr4-NM_20596-mMC015323	2.22792	-0.318296	0.268075	0.261284	-0.114081	0.106373	0.0468952
13298	5	8	18	mMC009838	Gm1549-No acc-mMC009838	2.22783	0.820419	0.0647894	0.122451	0.207042	-0.392676	0.0187924
3816	2	20	8	mMC001746	Npc1-NM_8720-mMC001746	2.22748	-0.286845	0.403431	0.0334807	0.119874	-0.258335	0.00109987
5766	2	81	6	mMC007801	Gpiap1-NM_16739-mMC007801	2.22704	0.496693	-0.247057	0.664064	-0.096672	-0.779977	0.0567094
13653	5	19	21	mMC011126	1700099I09Rik-No acc-mMC011126	2.22658	-0.132923	0.615598	-0.131054	0.217883	-0.0118296	2.71507e-07
9594	3	100	26	mMC009335	Pcnt2-NM_8787-mMC009335	2.22585	0.30852	1.10622	1.18492	-0.000976626	0.194568	0.00041045
2934	1	92	22	mMC008758	AI663987-NM_33526-mMC008758	2.22427	0.599124	0.315966	0.212493	-0.204286	-0.446027	0.000378895
17251	6	24	3	mMC011301	D630012G11Rik-No acc-mMC011301	2.22299	-0.137663	-0.168256	-0.216297	-0.0453868	-0.310956	0.000257694
18846	6	73	30	mMC016156	Gnb2-rs1-NM_8143-mMC016156	2.22245	0.00119878	-0.748382	-0.189595	0.164347	-0.729787	0.205118
19416	6	91	24	mMC017895	4933402J15Rik-No acc-mMC017895	2.21912	-0.229777	-1.35992	0.498394	0.237166	0.7337	0.0103662
9749	4	5	21	mMC009870	Pias1-NM_19663-mMC009870	2.21911	0.623438	0.474156	0.109058	-0.214001	-0.0535935	0.000100955
17522	6	32	18	mMC012046	Pdcd7-NM_16688-mMC012046	2.21873	-0.0249418	-0.495299	-0.168994	0.508053	-0.365736	0.0137835
9513	3	98	9	mMC009554	Stat1-NM_9283-mMC009554	2.21822	-0.607947	-1.81572	-0.184041	-0.196101	-1.11748	0.0298779
6316	2	98	12	mMC009227	1700041M19Rik-No acc-mMC009227	2.21755	0.652604	0.53999	0.0459641	0.718405	-0.313782	0.0013274
14970	5	60	26	mMC014807	Ubxd2-NM_26390-mMC014807	2.21514	-0.246773	0.925363	0.343084	-0.299681	-0.885775	1.34237e-07
9428	2	91	20	mMR028333	9330133O14Rik-NM_176948-mMR028333	2.21513	0.123646	0.170726	0.167789	-0.241101	-0.320435	0.0222713
1924	1	61	4	mMC005981	8030493G06Rik-No acc-mMC005981	2.21457	0.747076	1.24271	0.301506	-0.0479008	0.148748	0.0044574
8795	2	71	27	mMR026464	1700024K14Rik-NM_30179-mMR026464	2.21448	0.907205	0.953666	0.658328	0.239497	-0.0346419	0.00487763
9342	3	92	30	mMC008588	5730461K03Rik-NM_27475-mMC008588	2.21432	0.674624	0.840459	0.290059	0.342825	-0.614191	0.00229427
13769	5	23	9	mMC011482	Cyp4f15-NM_134127-mMC011482	2.21193	0.630376	0.441186	-0.134368	0.122968	-0.112631	0.00305341
17143	6	20	23	mMC010919	Zfp472-NM_153063-mMC010919	2.21157	-0.156554	-1.32272	0.231268	-0.213465	-0.230308	0.00189882
19058	6	80	18	mMC016654	2410022L05Rik-NM_25556-mMC016654	2.20946	0.586538	-0.0129166	0.371015	0.234595	-0.700057	0.118245
6039	2	89	23	mMC008599	Gngt2-NM_23121-mMC008599	2.20941	-0.404441	-0.548341	0.22161	-0.370445	-0.560974	0.00192991
2704	1	85	16	mMC008283	A230106M15Rik-NM_175474-mMC008283	2.20742	0.0537062	-0.176919	0.275594	0.0730194	-0.558671	0.0493256
14131	5	34	19	mMC012373	4833406L22Rik-No acc-mMC012373	2.20683	-0.265734	0.105922	0.0929684	-0.415647	-0.428192	0.00010925
6270	2	96	30	mMC009068	4933409L14Rik-No acc-mMC009068	2.20639	1.29367	-1.35454	0.280741	0.354521	-0.693346	0.0258906
728	1	23	24	mMC001967	3110003A22Rik-NM_26534-mMC001967	2.20388	0.325809	0.804054	1.0265	0.063016	-1.08357	0.180936
2365	1	74	29	mMC007068	D130073L02Rik-XM_125687-mMC007068	2.20356	0.572428	1.1822	-0.133505	-0.304658	0.401619	1.28755e-05
16934	6	14	6	mMC010681	Fcgrt-NM_10189-mMC010681	2.20349	0.562934	0.666919	0.112401	-0.264003	0.232785	0.000460676
6360	2	99	24	mMC009543	Aup1-NM_7517-mMC009543	2.20198	0.471236	-0.143908	-0.631462	-0.0670404	-0.40221	0.00214372
10164	4	18	20	mMC010861	E130201N16Rik-NM_30024-mMC010861	2.20119	-0.625048	0.341038	0.280842	-0.155676	0.337031	0.561864
13734	5	22	6	mMC011169	Sema3a-NM_9152-mMC011169	2.2011	0.598617	0.349814	0.162729	0.298587	-0.705586	0.0435582
13767	3	23	7	mMC021778	4931413I07Rik-No acc-mMC021778	2.20098	-0.210916	-2.33782	-0.972677	-0.157364	-0.332836	0.0105685
5973	2	87	21	mMC008438	C030014K22Rik-NM_175461-mMC008438	2.20064	-0.954701	-0.778543	-0.258442	-0.377475	-0.447677	0.0128126
14099	5	33	19	mMC012461	2610020H08Rik-NM_1004187-mMC012461	2.19925	-1.75502	-0.196187	0.00934836	-0.369878	-0.885975	1.18437e-07
8219	3	57	27	mMC005432	A430054B03-No acc-mMC005432	2.19904	-0.255387	0.531733	0.436479	0.486655	-1.08419	0.255277
17678	6	37	14	mMC012676	A530083I20Rik-No acc-mMC012676	2.19757	-0.295351	0.35151	0.0858365	0.127438	-0.36441	0.144375
5758	2	80	30	mMC007532	Map3k10-XM_194344-mMC007532	2.19496	0.278613	0.974157	-0.0936349	-0.292049	-0.422058	2.92426e-05
10911	4	41	31	mMC013328	2410137M14Rik-NM_29747-mMC013328	2.19439	0.65233	1.12665	0.368568	-0.14663	0.0783052	0.0707121
17852	6	42	28	mMC013376	Rarb-NM_11243-mMC013376	2.19339	-0.0370869	0.53875	-0.103398	-0.113347	-0.143853	0.00959944
2517	1	79	21	mMC007390	Pygl-NM_133198-mMC007390	2.19137	0.849024	1.3886	0.977162	0.325756	-0.5217	0.0294799
5735	2	80	7	mMC007578	Scarb2-NM_7644-mMC007578	2.19009	0.390505	-0.441147	0.646925	0.103674	0.610095	0.00642952
18403	6	60	3	mMC014757	Tex2-NM_198292-mMC014757	2.18831	-0.292443	0.175089	0.064485	-0.0219514	-0.789273	0.000853705
17058	6	18	2	mMC011041	Lba1-XM_284542-mMC011041	2.18666	0.722135	0.534957	-0.240398	-0.0261402	-0.533526	0.000474667
11294	4	53	30	mMC014428	4930463O16Rik-XM_483933-mMC014428	2.18664	0.0240327	1.51055	-0.0434419	-0.150102	-0.11678	0.0264409
14060	5	32	12	mMC012115	D15Mgi27-NM_134100-mMC012115	2.18654	0.308203	0.638153	0.184359	0.0229674	0.213433	1.89612e-05
14489	5	45	25	mMC013615	Slc25a2-XM_111757-mMC013615	2.18594	-0.0235285	-0.0123245	0.048999	0.209846	0.0283734	0.000217169
10249	2	117	9	mMR030866	Olfr43-NM_146711-mMR030866	2.18514	0.462136	1.02877	-0.195135	-0.426047	0.100072	0.00166965
13886	5	26	30	mMC011556	Stip1-NM_16737-mMC011556	2.18148	-0.0209962	0.661204	-0.041516	-0.110431	-0.101242	1.22554e-06
13665	5	20	1	mMC011033	2600006L11Rik-No acc-mMC011033	2.18129	1.05071	-0.344137	-0.373995	0.12414	1.91132	5.17446e-07
16770	6	9	2	mMC009985	1700113H21Rik-No acc-mMC009985	2.1806	-0.344084	1.02579	0.485004	-0.366143	-0.188493	0.16891
14046	5	31	30	mMC012228	5033428B15Rik-XM_129208-mMC012228	2.17999	1.00132	1.02823	-0.472628	0.303215	-0.268833	0.00923596
6130	2	92	18	mMC008686	AI662250-NM_178926-mMC008686	2.17982	0.628661	0.744012	0.768418	-0.007992	-0.908152	0.271949
13411	5	12	3	mMC010245	Mbd3-NM_13595-mMC010245	2.17937	1.01308	0.451364	-0.00900168	0.503796	-0.893093	5.15443e-06
17475	6	31	3	mMC012157	Olfr557-NM_146361-mMC012157	2.17587	-0.456696	0.584454	-0.188283	-0.196306	-0.277861	7.15257e-05
7733	2	38	21	mMC023126	A230087F16Rik-No acc-mMC023126	2.17573	0.58278	0.731212	-0.141714	-0.0586145	-0.668526	0.00138177
2842	1	89	26	mMC008647	2310058D17Rik-No acc-mMC008647	2.17497	0.576075	0.644875	0.650681	-0.276315	0.0710359	0.000179017
16839	6	11	7	mMC010258	0610031J06Rik-NM_20003-mMC010258	2.17373	0.870634	1.01874	0.120696	0.527498	0.262049	1.61381e-05
14561	5	48	1	mMC013721	Rcn3-NM_26555-mMC013721	2.17355	0.194726	0.457144	-0.031719	0.137899	0.0195301	3.68452e-05
14331	5	40	27	mMC012936	Kcnk1-NM_8430-mMC012936	2.17353	0.644526	0.795317	-0.013995	0.130356	-0.268334	0.002831
4102	2	29	6	mMC002809	Pacs1-NM_153129-mMC002809	2.17299	0.892608	1.29478	1.17936	0.417099	-0.0660777	0.0879619
7475	2	30	19	mMC022357	2010005A06Rik-NM_29357-mMC022357	2.17118	0.321156	0.167247	-0.174168	-0.184097	-0.560981	0.00308078
2194	1	69	18	mMC006750	Usp26-NM_31388-mMC006750	2.1704	0.455696	0.734877	0.431277	-0.36734	0.30493	0.00466925
1341	1	42	29	mMC003996	Ankrd2-NM_20033-mMC003996	2.16559	0.231314	-0.0318459	0.502308	-0.230585	-1.16738	0.00245792
15247	5	69	15	mMC015891	5430433E21Rik-XM_134954-mMC015891	2.16493	0.454761	-0.937671	0.0670345	0.154196	-0.78863	0.802445
5990	2	88	6	mMC008297	C130073E24Rik-No acc-mMC008297	2.16464	1.22759	0.746851	0.310356	0.0049615	-0.482551	0.151635
8594	3	69	18	mMC006558	6530418L21Rik-NM_175398-mMC006558	2.16289	-0.483304	0.0300072	0.196781	0.0317219	-0.561622	0.00333072
10445	4	27	13	mMC011612	1810021B22Rik-No acc-mMC011612	2.16257	0.71652	1.64926	0.033895	0.124771	0.288546	0.000215689
12048	2	173	16	mMO036219	IGKV8-16-Y15977-mMO036219	2.16081	0.37056	0.684911	0.159656	-0.40769	-0.624174	0.000164375
17369	6	27	25	mMC011799	D230002A01Rik-NM_176904-mMC011799	2.16032	0.141178	0.188654	0.524046	-0.386615	-0.861539	0.380534
3168	1	99	32	mMC009240	Slc1a5-NM_9201-mMC009240	2.159	0.115575	0.0449128	0.0825686	0.13953	-0.432264	0.00424547
5234	2	64	18	mMC005998	0610033H09Rik-NM_25338-mMC005998	2.15883	0.388736	0.630598	0.21784	-0.479024	0.0159462	0.0390502
5765	2	81	5	mMC007825	Olfr1395-NM_146877-mMC007825	2.15824	2.22517	1.05061	0.164538	-0.240733	-0.397239	3.66746e-06
7911	3	48	7	mMC004410	2310007B03Rik-NM_172411-mMC004410	2.15787	0.423691	0.815158	0.449277	-0.197533	0.0112923	0.0229406
1703	1	54	7	mMC005170	4930447I22Rik-No acc-mMC005170	2.1578	0.771615	0.265135	0.412482	0.054174	-0.410146	0.017719
17507	6	32	3	mMC012069	Msh6-NM_10830-mMC012069	2.15639	-0.287034	0.435449	-0.114067	0.227229	-0.0895946	0.165144
15072	5	63	32	mMC015280	Pdcl2-NM_23508-mMC015280	2.15509	-0.348456	-0.0920981	0.133826	-0.214127	-0.655043	2.54259e-06
2450	1	77	18	mMC007518	Zfp133-No acc-mMC007518	2.15355	0.742903	0.725066	0.407689	-0.170879	0.350379	2.0762e-05
896	1	28	32	mMC022200	Ece1-NM_199307-mMC022200	2.15039	0.57533	0.396048	-0.615092	-0.0234974	-0.964102	0.135701
6244	2	96	4	mMC009069	Irx1-NM_10573-mMC009069	2.15032	2.05992	0.0872226	-0.264227	0.493815	-0.75798	0.00122092
4609	2	45	1	mMC004393	Grem2-NM_11825-mMC004393	2.15022	-0.357478	0.139661	0.160099	0.0898218	0.587444	0.539547
7622	3	39	6	mMC003681	Nkx6-2-NM_183248-mMC003681	2.15016	-0.0429191	0.33926	-0.176042	0.060497	-0.691659	0.00477108
12034	2	173	2	mMO036193	IGLC2-J00595-mMO036193	2.14551	0.418125	-0.498539	-0.126674	-0.273874	0.341798	0.000895195
17563	6	33	27	mMC012344	4933412E24Rik-XM_484472-mMC012344	2.14344	-0.475374	-0.296951	-0.0297377	0.0787685	-0.302896	0.0214146
17097	6	19	9	mMC011002	Rab11fip5-NM_1003955-mMC011002	2.14283	-0.268637	0.817714	0.0993798	-0.0662314	-0.596211	1.32862e-05
5362	1	168	18	mMO035662	Nit1-NM_12049-mMO035662	2.14129	0.307362	0.134129	1.12386	-0.374477	0.629117	0.0413591
5968	2	87	16	mMC008387	Nrd1-NM_146150-mMC008387	2.14117	0.194075	0.276749	-0.0302502	-0.339029	-0.0925542	3.26321e-05
17822	6	41	30	mMC013084	4930478P22Rik-No acc-mMC013084	2.14062	-0.427789	0.300487	0.280433	-0.0487664	-0.344335	0.11059
15188	3	67	20	mMC025933	1190005N23Rik-No acc-mMC025933	2.13876	-0.369449	0.790095	0.303678	-0.0332322	-0.552246	0.000872907
2591	1	81	31	mMC007952	Pklr-NM_13631-mMC007952	2.13863	0.594281	1.04172	0.128891	-0.174245	-0.396599	3.25383e-07
5472	2	71	32	mMC006832	A230103J11Rik-No acc-mMC006832	2.13669	0.753996	0.416773	0.063827	-0.200951	0.189022	0.510991
13834	5	25	10	mMC011642	Crsp9-NM_25426-mMC011642	2.13669	0.184963	0.503378	-0.328655	0.0620743	-0.504205	8.44064e-08
10096	4	16	16	mMC010699	Hist1h1c-NM_15786-mMC010699	2.13581	-0.255004	1.27835	0.314364	-0.0418745	0.346778	2.51181e-06
15364	5	73	4	mMC016253	Slc25a15-NM_11017-mMC016253	2.13428	0.0162753	0.410762	0.0539681	-0.128091	-0.0322675	0.000623836
3910	2	23	6	mMC002241	4921513D23Rik-No acc-mMC002241	2.13296	0.554928	0.550791	0.422219	-0.258476	-0.599143	0.0441728
9148	2	82	28	mMR027304	Glyat-NM_145935-mMR027304	2.1328	0.963234	0.372563	0.351724	0.0566592	-0.300838	0.049256
16937	6	14	9	mMC010706	Olfr259-NM_146770-mMC010706	2.13274	-0.458051	-0.620802	-0.0919842	0.0832101	-0.37721	0.0314492
15016	5	62	8	mMC014986	Anapc1-NM_8569-mMC014986	2.13254	-0.191407	0.433475	0.464775	0.134227	0.162263	0.00108091
17647	6	36	15	mMC012451	Rnf152-NM_178779-mMC012451	2.13251	0.388947	0.544275	0.328445	-0.162018	-0.949329	7.71747e-05
13599	5	17	31	mMC010928	Vps16-NM_30559-mMC010928	2.13227	0.317935	0.319283	-0.28566	0.226479	-0.266571	0.523565
19214	6	85	14	mMC017284	Frda-NM_8044-mMC017284	2.12952	-1.5787	-0.807867	0.241089	0.0670529	-0.620523	0.0262579
6268	2	96	28	mMC009072	Psma7-NM_11969-mMC009072	2.12948	0.737509	0.458028	-0.322019	0.505823	-0.409651	0.00957497
1655	1	52	23	mMC004967	BC059177-NM_198248-mMC004967	2.12932	0.589451	0.900245	0.506556	-0.237978	-0.17063	0.00473332
2712	1	85	24	mMC008287	Olfr1330-NM_146334-mMC008287	2.12847	0.254714	0.115976	0.0386712	-0.25381	0.00593432	0.000332906
2892	1	91	12	mMC008467	1700126G02Rik-No acc-mMC008467	2.12813	0.261267	0.800152	0.38505	0.0300628	-0.082668	0.000231066
13522	5	15	18	mMC010694	BC052486-No acc-mMC010694	2.12808	0.332622	0.765831	0.2452	-0.0957896	-0.388408	0.000302201
4003	2	26	3	mMC002365	Mcpt7-NM_31187-mMC002365	2.1277	0.428248	-0.252605	0.303339	-0.291181	-0.023713	0.0342572
2524	1	79	28	mMC007344	B930095M22Rik-No acc-mMC007344	2.12729	0.673926	1.39285	0.239499	0.0550889	-0.0715297	0.0118306
10689	4	35	1	mMC012377	6330415M09Rik-NM_27539-mMC012377	2.12565	1.39396	1.74523	-0.0269909	0.0284695	0.20843	0.00231366
3806	1	119	30	mMR030764	Gfap-NM_10277-mMR030764	2.12496	0.378656	0.149637	0.633339	0.0615599	0.526756	0.0228997
19125	6	82	21	mMC017262	Txnl6-NM_145598-mMC017262	2.12377	0.427209	0.574867	0.237484	0.0357885	-0.782192	0.000587129
9029	3	83	5	mMC007929	Atp8b3-NM_26094-mMC007929	2.12281	1.74026	0.756776	0.0260698	-0.299236	-0.238924	9.27326e-06
15242	5	69	10	mMC015866	Runx1-NM_9821-mMC015866	2.12235	0.00803439	0.513329	-0.12358	-0.0996759	0.0208584	0.00129799
12023	2	172	23	mMO035975	18S-rRNA_X00686-mMO035975	2.12218	1.48823	0.460052	0.348122	-0.133737	-2.19241	1.44468e-05
5448	2	71	8	mMC006826	Nudt4-NM_27722-mMC006826	2.11951	0.0339662	1.14774	-0.0541715	-0.292705	-0.206146	0.0032362
2944	1	92	32	mMC008760	1200016G03Rik-XM_283319-mMC008760	2.11907	0.0935521	1.73078	0.446865	0.0165877	0.361722	0.00875327
13759	5	22	31	mMC011224	Lhx8-NM_10713-mMC011224	2.11839	0.645949	1.15018	-0.143037	0.497207	-0.883045	3.84767e-08
1785	1	56	25	mMC005375	Muc5ac-No acc-mMC005375	2.11795	0.223392	-3.19373	0.137831	-0.0759968	-0.0890792	0.00035838
2709	1	85	21	mMC008334	4930563H03Rik-No acc-mMC008334	2.11673	1.03987	1.02461	0.0696401	0.740413	-0.357496	0.00194486
19217	6	85	17	mMC017334	Rpp14-NM_25938-mMC017334	2.11613	-0.0965207	0.0229996	0.196064	-0.280973	-1.01274	0.00786807
16785	6	9	17	mMC010038	Surf4-NM_11512-mMC010038	2.11607	0.625544	-0.148289	-0.102104	0.110983	-0.496869	0.0198019
18204	6	53	28	mMC014240	2810405F17Rik-No acc-mMC014240	2.11602	0.272375	0.143103	0.532057	-0.115361	-0.491314	0.655707
9757	4	5	29	mMC009844	3300001G02Rik-NM_30093-mMC009844	2.11493	0.143772	1.44081	0.12278	0.374399	0.97299	0.000115157
893	1	28	29	mMC002660	Maff-NM_10755-mMC002660	2.11359	0.631591	-0.0397777	0.807753	0.0581653	-0.0423095	0.497782
19207	6	85	7	mMC017354	1700061J23Rik-No acc-mMC017354	2.11288	-0.0543046	0.275583	1.01743	0.0556931	0.195136	0.0519747
4083	2	28	19	mMC002589	Ankfy1-NM_9671-mMC002589	2.10919	-0.325419	-0.355639	-0.224623	-0.0242961	-0.461845	3.37361e-05
11749	4	68	5	mMC015713	2900092C05Rik-NM_28434-mMC015713	2.10873	0.244317	2.09471	0.803256	-0.302335	1.00782	0.00974279
9327	3	92	15	mMC008611	Dll1-NM_7865-mMC008611	2.10728	0.873861	-0.0835153	-0.497894	0.0886075	-0.717373	0.0296358
2903	1	91	23	mMC008519	5230401M06Rik-No acc-mMC008519	2.1065	-0.329442	0.707608	0.450029	-0.25519	-0.488115	0.00553507
6376	2	100	8	mMC009426	4933425B07Rik-No acc-mMC009426	2.10602	0.303463	0.207599	0.443247	-0.000271003	0.156917	0.000271761
6295	2	97	23	mMC009367	Atf3-NM_7498-mMC009367	2.10436	0.950498	0.69422	0.177493	0.204602	-0.637476	0.0230957
17181	6	21	29	mMC011188	2810003K23Rik-XM_126677-mMC011188	2.10299	-0.422694	0.0780918	0.560976	0.231196	-1.09881	0.00774287
18119	6	51	7	mMC014098	Cd34-NM_133654-mMC014098	2.10227	-0.467965	-0.382698	-0.0958434	-0.65199	-0.265893	0.00402384
10116	4	17	4	mMC010973	Sdhd-NM_25848-mMC010973	2.10085	-0.341675	0.703857	0.775279	-0.242913	0.704972	0.0900139
17686	6	37	22	mMC012678	BC030314-NM_146259-mMC012678	2.10079	-0.0202705	-0.296664	0.239337	-0.123259	-0.972164	9.15087e-06
1913	1	60	25	mMC005759	A630006J10Rik-No acc-mMC005759	2.10045	0.306434	-0.284468	0.314742	-0.400516	-0.555092	0.0667991
7427	3	33	3	mMC003125	6330419J24Rik-NM_183030-mMC003125	2.09996	-0.306385	0.542822	0.299784	-0.456336	0.236533	0.00209563
14036	5	31	20	mMC012205	Foxn4-NM_148935-mMC012205	2.09994	0.745287	0.575672	-0.693918	-0.356315	1.19668	1.9152e-06
17914	6	44	26	mMC013175	4930435F05Rik-No acc-mMC013175	2.09929	-0.273774	0.442711	0.223492	0.153666	-0.871696	0.0314786
17036	6	17	12	mMC010755	B230323A14Rik-No acc-mMC010755	2.0991	0.709006	0.583167	0.00266067	-0.0503918	-1.69221	0.00974775
639	1	20	31	mMC001920	Ivl-NM_8412-mMC001920	2.09751	-1.16985	-1.64912	0.0932724	-0.0236457	-1.20311	0.0417855
8079	3	53	15	mMC005043	Twist1-NM_11658-mMC005043	2.09654	0.870437	0.709142	-0.40534	0.212904	-0.69223	0.00725343
13487	3	14	15	mMC021075	Rpl10a-NM_11287-mMC021075	2.09566	-0.655555	1.15709	-0.0709575	0.631307	-0.794184	0.00214192
4037	2	27	5	mMC002649	AI326906-NM_153570-mMC002649	2.09462	0.441209	-0.435239	-0.0532109	-0.340573	0.287739	5.70399e-05
2417	1	76	17	mMC007270	Acadsb-NM_25826-mMC007270	2.09311	0.0590695	-2.92932	0.197464	0.139811	-3.56156	4.82482e-08
15125	5	65	21	mMC015534	Caml-NM_7596-mMC015534	2.09298	0.668906	0.425929	0.0561962	0.198491	-0.955564	0.00238782
9848	4	8	24	mMC009935	2310015D24Rik-XM_488767-mMC009935	2.09223	0.510787	0.727542	0.0877419	-0.123531	-0.727446	0.000575326
14943	5	59	31	mMC014968	9930117H01Rik-NM_177260-mMC014968	2.09076	0.205821	0.0917312	-0.0315267	-0.221758	-0.993206	0.359982
14112	5	33	32	mMC012392	4933417E11Rik-No acc-mMC012392	2.0885	0.171705	0.424701	0.107957	-0.0319612	-0.268359	0.00161643
9895	4	10	7	mMC010162	Arc-NM_18790-mMC010162	2.08817	-0.231627	0.153423	-0.0259496	0.0287491	-0.773432	0.0173799
1887	1	59	31	mMC005472	2410137F16Rik-No acc-mMC005472	2.08815	0.275064	-0.291944	0.184238	-0.108093	-0.350368	0.00369533
14054	5	32	6	mMC012137	C030019G06Rik-No acc-mMC012137	2.08792	0.46818	0.375753	0.136183	-0.0243117	0.194919	6.42202e-05
13457	5	13	17	mMC010518	Zfp312-NM_80433-mMC010518	2.08787	0.531535	1.02904	-0.314104	-0.0355295	0.0735488	5.02862e-06
799	1	25	31	mMC002576	2610029K21Rik-NM_25663-mMC002576	2.08713	0.150501	-3.40243	0.885563	-0.129396	-0.420756	0.0376562
2009	1	63	25	mMC005855	Atp6v1e1-NM_7510-mMC005855	2.08681	-0.249518	0.874685	0.496104	-0.0502183	-0.0390117	0.000957509
3809	2	20	1	mMC001817	E230025E14Rik-No acc-mMC001817	2.08577	0.172404	1.08024	0.531536	-0.461807	-0.104165	0.0269633
19187	6	84	19	mMC017085	4930565N06Rik-No acc-mMC017085	2.08548	-0.410678	-0.670369	0.560874	0.0639968	-0.971362	0.0126122
14512	5	46	16	mMC013475	Rbm18-NM_26434-mMC013475	2.08516	0.260813	0.337766	0.388923	-0.375145	0.333097	1.77468e-05
7335	2	26	7	mMC021970	Ubb-NM_11664-mMC021970	2.08488	1.29213	1.76449	-0.998946	0.566344	-0.759659	6.76303e-06
17098	6	19	10	mMC010978	A530090P03Rik-NM_177155-mMC010978	2.08392	-0.54108	0.537081	0.198423	-0.0316785	-0.371127	0.000214112
17287	6	25	7	mMC011594	AI415330-NM_178114-mMC011594	2.0828	0.105155	0.713013	0.228013	-0.101896	-0.407822	0.107483
13516	5	15	12	mMC010667	B630019A10Rik-NM_177072-mMC010667	2.08146	0.350864	1.17676	-0.624713	-0.0750086	1.11657	8.28261e-05
4014	2	26	14	mMC002316	Fabp9-NM_11598-mMC002316	2.08073	1.0542	0.482569	0.198082	0.0480674	-0.13705	0.0634988
4069	2	28	5	mMC002561	Ltb4dh-NM_25968-mMC002561	2.07634	-0.199822	-1.30396	0.518121	-0.177408	-0.859484	0.442577
13810	5	24	18	mMC011374	D14Ertd500e-NM_145462-mMC011374	2.07579	0.718388	1.05021	-0.719207	0.190885	0.28334	1.42121e-05
15502	3	77	14	mMR026884	C330046E03-No acc-mMR026884	2.07527	0.944443	1.48917	-0.0718353	-0.588296	0.22691	0.000209847
16997	6	16	5	mMC010529	Zfp462-NM_172867-mMC010529	2.07526	-0.473719	1.20129	-0.0829403	-0.0700037	-0.315885	6.9269e-05
5473	2	72	1	mMC006809	5330414O08Rik-NM_183270-mMC006809	2.07411	0.276079	0.423225	0.310886	-0.323352	0.192775	7.47592e-06
15726	5	84	14	mMC017108	2310004K06Rik-NM_20050-mMC017108	2.07403	0.190753	0.252166	-0.309663	0.148436	-0.120978	0.0223069
8519	3	67	7	mMC006418	Mrps12-NM_11885-mMC006418	2.07285	1.03699	-0.0151127	0.434847	-0.20579	-0.284432	0.0574758
14822	5	56	6	mMC014441	C1rl-NM_181344-mMC014441	2.07284	0.458723	0.298937	0.447203	0.0503232	-0.234203	0.0870673
14717	5	52	29	mMC014084	Dgcr8-NM_33324-mMC014084	2.07277	0.289143	0.363663	0.555509	-0.160806	0.319973	0.0208532
17060	6	18	4	mMC011069	Glis3-NM_175459-mMC011069	2.07249	0.0568255	1.6938	-0.160543	0.28839	-0.113262	0.239209
5663	2	77	31	mMC007472	Myo7b-NM_32394-mMC007472	2.0719	0.856068	-0.895825	0.0510094	0.327642	-1.09001	0.00266075
15365	5	73	5	mMC016273	AW536289-No acc-mMC016273	2.07122	-0.12569	-0.0265517	0.717205	-0.0233783	0.0893266	0.0680903
2098	1	66	18	mMC006278	Anks1-NM_181413-mMC006278	2.0699	0.0994568	0.497229	0.105032	-0.266281	-0.401931	0.000384999
5151	2	61	31	mMC005936	Dsg4-NM_181564-mMC005936	2.06987	0.702313	0.611238	0.321264	0.0719041	-0.832429	0.0244647
6198	2	94	22	mMC008846	AI132321-NM_178911-mMC008846	2.0681	0.477378	-0.239058	0.254335	-0.488835	-0.111265	0.126964
16870	6	12	6	mMC010121	Slamf8-XM_129596-mMC010121	2.06764	0.275625	-0.32694	-0.216746	-0.433659	0.14583	0.0255156
16944	6	14	16	mMC010683	2810403A07Rik-NM_28814-mMC010683	2.06757	-0.273262	0.0730293	-0.0286598	0.143358	-0.736432	3.00034e-05
7058	2	17	18	mMC021246	4921501E01Rik-XM_354902-mMC021246	2.06742	0.0974281	1.05414	-0.745836	0.107419	-0.749557	0.0179306
9871	4	9	15	mMC010227	Nfil3-NM_17373-mMC010227	2.06715	-0.133371	1.00962	0.270308	-0.175355	-0.000220528	3.24493e-05
15499	3	77	11	mMR026955	Mug2-NM_8646-mMR026955	2.06545	1.74743	2.16772	-1.1738	-0.6079	2.08903	0.000171942
5717	2	79	21	mMC007670	Prkwnk4-NM_175638-mMC007670	2.06506	1.00831	0.419668	-0.441641	0.314032	-0.804297	0.0542447
13821	5	24	29	mMC011396	Thap6-No acc-mMC011396	2.06373	-0.012715	1.38758	0.139024	0.0405882	-0.0350164	0.00495273
9220	3	89	4	mMC008477	4930444A02Rik-NM_29037-mMC008477	2.06261	0.835174	2.1282	-0.429386	0.0801618	-0.181419	4.46113e-06
17744	6	39	16	mMC012899	D630003M21-NM_177657-mMC012899	2.06223	-0.403687	-0.479462	0.0651156	-0.0271656	-0.323927	0.00849404
7091	3	22	19	mMC002285	4932430A15Rik-No acc-mMC002285	2.05991	-0.473056	-1.93641	-0.00560947	-0.549131	-0.67615	0.00175418
10444	4	27	12	mMC011539	4931412I15Rik-No acc-mMC011539	2.05949	0.533049	1.27611	0.585663	0.553179	0.430156	0.0814321
4156	2	30	28	mMC002728	Plg-NM_8877-mMC002728	2.05924	1.84241	1.50069	0.587844	0.0404971	0.0814629	0.0433844
15541	3	78	21	mMR027246	Sh3d19-NM_12059-mMR027246	2.05715	0.18494	1.7747	-0.375952	-0.320927	-0.0654717	0.000652625
6386	2	100	18	mMC009454	5630401D06Rik-No acc-mMC009454	2.05676	-0.0180967	1.44439	0.27333	0.145041	-0.236805	0.000106444
19858	6	105	18	mMC019230	Tbx15-NM_9323-mMC019230	2.05566	0.244154	0.38669	0.0161228	0.224411	0.775878	2.50241e-05
10063	2	111	15	mMR030299	5430432N15Rik-NM_172418-mMR030299	2.05358	0.523044	0.424263	0.963185	-0.309934	-0.143494	0.00790542
18562	6	65	2	mMC015361	BC031781-NM_145943-mMC015361	2.05237	0.301512	0.102528	0.188237	-0.624114	-0.736327	0.0601016
10638	4	33	14	mMC012484	1110012J17Rik-NM_172963-mMC012484	2.05095	-0.01879	1.43263	0.627296	-0.0896229	0.478158	0.00929406
10319	4	23	15	mMC011203	2310066E14Rik-XM_486159-mMC011203	2.0506	1.15838	1.36303	0.367173	0.00239474	-0.469309	0.00069174
3003	1	94	27	mMC008992	Tnip2-NM_139064-mMC008992	2.05039	0.733498	1.10621	0.289037	-0.292785	0.0684384	0.000377587
1177	1	37	25	mMC003727	Pomc1-NM_8895-mMC003727	2.0498	0.646892	1.35233	0.11402	-0.0677226	-0.362	0.000650802
9019	2	78	27	mMR026944	Skiip-NM_25507-mMR026944	2.04968	0.431545	0.795369	0.209646	-0.221462	-0.425745	0.0351553
2363	1	74	27	mMC007072	BB128963-NM_172742-mMC007072	2.04871	0.505695	1.4244	0.108182	-0.263185	0.072524	9.94009e-06
16775	6	9	7	mMC010058	Jph1-NM_20604-mMC010058	2.0474	-0.347127	-1.59934	0.577889	0.0676684	-0.795842	0.114668
4356	2	37	4	mMC003581	5830444F18Rik-No acc-mMC003581	2.04682	0.332978	-0.109712	0.598361	-0.410662	-0.433877	0.249051
6735	3	11	15	mMC001019	Serpina3c-NM_8458-mMC001019	2.04472	0.0918753	1.9225	0.3547	0.0477297	-1.35688	8.84843e-05
9107	3	85	19	mMC008141	1700065O13Rik-XM_128550-mMC008141	2.04468	-2.44844	0.0342292	0.803117	-0.165727	-0.859361	0.000492035
9291	3	91	11	mMC008723	1700006D18Rik-No acc-mMC008723	2.04441	-0.104142	0.382127	-0.120347	0.0734934	-0.0192451	0.000213331
17209	6	22	25	mMC011503	AW050020-NM_172943-mMC011503	2.04383	-0.525458	-0.103609	0.0805352	-0.137018	-0.790359	0.1309
5924	2	86	4	mMC008101	Scnn1b-NM_11325-mMC008101	2.04209	0.646576	-0.517709	0.307222	-0.325404	0.199192	0.0115723
7863	2	42	23	mMC023487	Ptpn11-NM_11202-mMC023487	2.04066	0.833942	0.631131	-0.429326	0.573828	-0.537469	0.0262708
5764	2	81	4	mMC007805	1700017I11Rik-NM_25491-mMC007805	2.04061	0.690389	1.40521	0.125632	-0.156735	0.0822991	8.91896e-05
6724	2	7	4	mMC020293	Afmid-NM_27827-mMC020293	2.0405	0.457435	0.952194	-0.837928	-0.0161365	-0.789213	0.00365828
10856	4	40	8	mMC012978	9530043G02Rik-NM_175426-mMC012978	2.03945	0.568518	1.14044	0.440752	0.401865	0.268141	0.0503975
14012	5	30	28	mMC011944	Acp5-NM_7388-mMC011944	2.03914	0.0807963	0.478191	-0.176298	-0.144397	-0.270046	0.000136826
7145	2	20	9	mMC021378	D430001F17Rik-No acc-mMC021378	2.03902	1.0302	1.62543	-0.942029	0.122233	-0.867049	0.00182473
15299	5	71	3	mMC016093	5730409K12Rik-No acc-mMC016093	2.03889	0.117624	0.611849	0.464442	-0.250547	0.285887	0.00180099
5604	2	76	4	mMC007149	D12Ertd647e-NM_26790-mMC007149	2.03885	1.73855	0.703249	0.462098	0.107973	-0.0603629	0.00436086
9928	4	11	8	mMC010002	A730032D07Rik-XM_194983-mMC010002	2.03857	-0.494715	1.47865	1.00991	-0.140646	0.528271	0.00136447
2391	1	75	23	mMC006983	Atp5b-NM_16774-mMC006983	2.03681	1.06691	0.74576	0.261129	-0.151868	0.791407	0.000363123
5761	2	81	1	mMC007849	Slc25a10-NM_13770-mMC007849	2.03628	1.27979	-0.69356	0.243273	-0.109191	0.190583	4.109e-05
9930	4	11	10	mMC010026	Wdr23-NM_133734-mMC010026	2.03606	0.174505	0.825978	0.0509793	0.164001	0.863339	0.00028658
15274	5	70	10	mMC015778	9430023B20Rik-NM_177595-mMC015778	2.03583	0.432315	0.293674	0.0214182	0.611174	-0.331406	0.00035118
15108	5	65	4	mMC015485	4930414N08Rik-No acc-mMC015485	2.03576	1.19387	1.20709	-0.20866	0.116567	0.178667	0.0124171
1597	1	50	29	mMC004764	Rac3-NM_133223-mMC004764	2.03243	0.659531	-0.465216	0.0607142	0.154726	-0.741457	0.00679809
14570	3	48	10	mMC023946	0610040F04Rik-No acc-mMC023946	2.0323	-0.0508083	0.339766	-0.284281	-0.15067	-0.230876	0.00410167
18471	6	62	7	mMC015338	Scgb3a2-NM_54038-mMC015338	2.03169	0.54326	-1.29928	1.0628	0.587539	-1.05423	0.127423
7060	3	21	20	mMC001925	Snx5-NM_24225-mMC001925	2.03128	-0.115404	1.5707	-0.292098	0.667201	-1.10494	0.000294267
2971	1	93	27	mMC009080	1810008O21Rik-XM_485868-mMC009080	2.03049	0.620824	-1.73051	0.319389	-0.27647	-0.477512	0.000150368
10108	4	16	28	mMC010704	Sec63-NM_153055-mMC010704	2.0296	-0.00188154	-0.160561	0.206908	-0.222733	0.272348	0.0127337
14653	5	50	29	mMC013884	2610024B07Rik-No acc-mMC013884	2.02956	0.378582	0.19184	0.307822	-0.351948	-0.259053	0.0597087
2451	1	77	19	mMC007565	Pink1-NM_26880-mMC007565	2.02857	0.6021	1.01379	0.453642	-0.204332	-0.0319628	0.000763415
861	1	27	29	mMC002372	A630049H14Rik-No acc-mMC002372	2.02733	0.0446642	-0.0990061	0.536118	-0.0554793	-0.998294	0.212811
1429	1	45	21	mMC004494	Hapln4-NM_177900-mMC004494	2.02725	-0.217008	2.42298	0.222377	-0.479458	-0.428274	1.1754e-05
7605	3	38	21	mMC003822	4930488P18Rik-No acc-mMC003822	2.0272	-0.114942	0.92765	0.0307153	0.616086	-0.636611	0.0095144
19064	6	80	24	mMC016655	9430006E15Rik-No acc-mMC016655	2.02698	-1.58154	-1.27149	0.0250354	0.323854	-0.634845	0.00260579
9230	3	89	14	mMC008452	Gabbr1-NM_19439-mMC008452	2.02648	-0.552234	-0.559875	-0.325231	-0.13504	-0.11479	0.00148455
2092	1	66	12	mMC006251	Stard10-NM_19990-mMC006251	2.026	0.561777	1.4444	-0.142731	0.153936	-0.220804	2.23532e-06
13720	5	21	24	mMC011263	Il3-NM_10556-mMC011263	2.02532	-0.161951	0.650208	-0.177574	-0.0852043	-0.135299	0.000487833
16796	6	9	28	mMC010016	Cyp39a1-NM_18887-mMC010016	2.02474	-0.905872	-0.035036	-0.342927	-0.152109	-1.01303	0.140781
6990	3	19	14	mMC001740	H2-M10.1-NM_13544-mMC001740	2.02467	-0.379925	-0.395447	0.38111	-0.12018	-1.15812	0.0126778
9320	3	92	8	mMC008562	4930548H24Rik-NM_26296-mMC008562	2.02462	0.764109	0.555934	-0.0762778	-0.117098	-0.761342	0.101822
8656	3	71	16	mMC006755	4930554H23Rik-No acc-mMC006755	2.02347	0.406874	0.470111	-0.380874	0.181513	-1.81881	0.0166887
10254	4	21	14	mMC011332	4930456K20Rik-No acc-mMC011332	2.02306	-0.170307	-0.705427	-0.0442507	-0.275793	0.601893	2.70351e-05
10334	4	23	30	mMC011180	Shc3-NM_9167-mMC011180	2.02296	0.714606	0.82251	0.0537665	-0.0719666	-0.00549535	0.0205068
11976	4	75	8	mMC016146	BC054059-NM_145635-mMC016146	2.02166	-0.261907	0.384783	0.20217	-0.0566924	0.0306613	0.109639
7305	3	29	9	mMC002738	4932416A11Rik-NM_147776-mMC002738	2.02148	0.0276664	0.672322	0.232926	0.446053	-0.322547	0.010187
2726	1	86	6	mMC008193	C430049A07Rik-No acc-mMC008193	2.02126	-0.168564	0.626791	0.36292	-0.241262	0.194195	0.482104
1836	1	58	12	mMC005483	2310033P09Rik-NM_24210-mMC005483	2.02023	-0.151185	-1.14392	0.472719	0.130228	-0.212273	0.503053
6122	2	92	10	mMC008682	Stx5a-NM_19829-mMC008682	2.01979	0.349904	0.571419	0.105867	-0.68219	0.0083182	0.00207244
7897	3	47	25	mMC004503	Atcay-NM_178662-mMC004503	2.0186	0.665827	0.724346	0.0921322	0.442702	-0.75946	0.00602009
7193	2	21	25	mMC021679	Ngfg-NM_8693-mMC021679	2.01595	0.752186	1.00007	-0.234279	-0.179168	-0.0136754	0.30514
18845	6	73	29	mMC016180	Zc3hdc1-NM_172893-mMC016180	2.01575	-0.34964	-2.13457	-0.308042	0.0496249	-0.499902	0.0362618
16891	6	12	27	mMC010152	Prss8-NM_133351-mMC010152	2.01358	-0.414976	0.195748	0.347844	0.0916626	-0.274351	0.279581
17219	6	23	3	mMC011389	2010110M21Rik-NM_25933-mMC011389	2.01094	-0.308935	0.658681	0.245413	-0.130201	-0.488078	0.151635
14729	5	53	9	mMC014354	Slitrk2-XM_205324-mMC014354	2.01047	0.42214	0.607366	0.20754	-0.00739812	-0.803734	0.0192173
15684	5	83	4	mMC017221	Pank2-NM_153501-mMC017221	2.00992	0.0226989	0.446058	0.134554	0.109822	-0.0319059	0.0331376
350	1	11	30	mMC000812	A930035D04Rik-No acc-mMC000812	2.00954	0.157988	-3.52677	0.54529	-0.304366	-0.374926	0.0125083
832	1	26	32	mMC002416	0610040J01Rik-NM_29554-mMC002416	2.00874	-0.227479	0.149347	0.235733	-0.688425	0.349823	0.506237
7211	3	26	11	mMC002667	Capn1-NM_7600-mMC002667	2.00742	0.180817	0.207871	0.00493658	-0.453097	-0.401386	0.00867604
1496	1	47	24	mMC004271	5330439C02Rik-XM_484070-mMC004271	2.00708	0.623435	1.67343	0.460273	0.0118886	-0.453293	5.10723e-06
3880	2	22	8	mMC001930	Cdca4-NM_28023-mMC001930	2.00619	-0.261761	1.11428	0.680467	-0.248417	0.181894	0.411179
15028	5	62	20	mMC014989	D030041H20Rik-No acc-mMC014989	2.00491	0.280465	0.437168	-0.211381	-0.353716	0.468458	0.0446948
12105	2	175	9	mMO036442	IGKV13-62-1-AJ132672-mMO036442	2.00242	0.628798	-0.805458	0.00957556	-0.328726	-1.30655	0.0135493
18324	6	57	20	mMC014597	Olfr770-NM_146863-mMC014597	2.00215	-0.55398	-0.948447	0.316992	0.0198769	-0.934112	0.0658493
18457	6	61	25	mMC015055	2900057B20Rik-No acc-mMC015055	2.00213	-0.569293	-0.717299	0.22859	0.353994	-0.249634	0.0733045
6948	2	14	4	mMC020773	2010003K15Rik-No acc-mMC020773	2.00204	0.701108	1.22781	-1.18456	0.024967	-0.895027	0.00217312
14708	3	52	20	mMC024309	Apoc3-NM_23114-mMC024309	2.0006	2.20968	1.73476	-1.20493	0.748645	1.26421	0.0284702
4097	2	29	1	mMC002857	Tcfe3-NM_172472-mMC002857	2.00039	-0.366092	-1.77228	0.427087	-0.31447	-1.03063	0.224422
9190	3	88	6	mMC008201	Notch3-NM_8716-mMC008201	2.00026	1.20253	0.617802	0.289215	-0.256692	0.0508549	0.260664
12591	4	94	15	mMC018203	Rab18-NM_11225-mMC018203	1.99982	-0.15757	0.757896	0.731038	-0.297343	0.630628	0.00140125
6560	2	1	32	mMC019688	Ppia-NM_8907-mMC019688	1.99967	0.0665791	2.4117	0.0161275	0.164088	-0.060776	2.43895e-05
9246	3	89	30	mMC008476	Lrrc10-NM_146242-mMC008476	1.99694	-0.0515801	-0.370713	0.635233	0.113116	0.165257	0.0705942
19096	6	81	24	mMC016927	Tmod4-NM_16712-mMC016927	1.99623	-0.596997	0.594186	-0.0939019	0.19311	-0.485865	0.00194829
18884	6	75	4	mMC016357	Apcs-NM_11318-mMC016357	1.99582	1.17618	2.23625	-0.426267	0.162941	-0.654926	4.29051e-07
4742	2	49	6	mMC004729	9530083O12Rik-No acc-mMC004729	1.99521	-0.241673	-0.535888	0.407528	-0.302488	-0.699323	0.134959
8312	2	56	24	mMC024815	Cfdp1-NM_11801-mMC024815	1.99487	-0.319975	0.326494	0.00186319	0.0026504	0.155847	0.18608
10517	4	29	21	mMC012174	Cxcl16-NM_23158-mMC012174	1.99324	0.373427	1.05518	0.146441	-0.21767	0.905868	0.0235311
4230	2	33	6	mMC003193	AK122525-NM_199028-mMC003193	1.99321	0.15451	0.696837	0.301687	-0.272613	-0.398789	0.205154
5630	2	76	30	mMC007148	2010001M06Rik-No acc-mMC007148	1.99288	0.976463	0.712616	-0.130755	-0.0299078	-0.319157	1.28086e-05
5870	2	84	14	mMC007892	4930538D17Rik-NM_29186-mMC007892	1.99284	-0.10262	0.843265	-0.520449	-0.190087	-0.0301772	0.000160095
17238	6	23	22	mMC011342	Parva-NM_20606-mMC011342	1.99253	0.0105981	0.163446	-0.194084	-0.212124	0.335342	0.00920603
13672	5	20	8	mMC010962	Il1b-NM_8361-mMC010962	1.9919	0.39997	0.429668	0.222921	-0.189098	-0.462851	0.0254459
5631	2	76	31	mMC007200	Rassf5-NM_18750-mMC007200	1.99058	0.329553	0.224542	0.354885	0.722904	-0.440545	0.0108898
9116	3	85	28	mMC008096	8030479D07Rik-No acc-mMC008096	1.98933	-0.225278	0.121957	0.380426	0.0745867	-0.65949	0.0329893
11223	4	51	23	mMC013895	Mlh3-XM_484162-mMC013895	1.98931	-0.11318	1.33012	0.568366	-0.159397	0.3769	0.0336762
17063	6	18	7	mMC011114	4731420N21-No acc-mMC011114	1.98818	-1.15379	-0.673603	-0.481866	0.0522981	-0.389291	0.00120036
5725	2	79	29	mMC007644	Psmb10-NM_13640-mMC007644	1.98809	0.523886	0.869626	-0.0446076	-0.320646	0.0967015	0.000486657
17229	6	23	13	mMC011412	D630003K02Rik-NM_177216-mMC011412	1.98666	0.186664	-0.442455	-0.0569493	0.234058	-0.661856	0.435962
606	1	19	30	mMC001580	Cno-NM_133724-mMC001580	1.98654	-0.132808	0.706118	0.20925	-0.202726	-0.767149	0.000143041
13528	5	15	24	mMC010695	Pdap1-XM_132501-mMC010695	1.98596	0.935836	1.09449	-0.907525	0.207663	-0.198998	0.000360346
13458	5	13	18	mMC010494	Sox2-NM_11443-mMC010494	1.98546	0.333412	1.25302	0.0208592	0.162472	0.212021	0.000284488
5376	2	68	32	mMC006360	Acaa2-NM_177470-mMC006360	1.9853	-0.111011	1.80162	0.0414637	-0.352599	1.53138	0.373273
10136	2	113	24	mMR030463	Cacna2d2-NM_20263-mMR030463	1.98513	0.185863	1.53216	-0.382644	-0.257524	0.0150654	0.00364298
10157	2	114	13	mMR030420	Wsb2-NM_21539-mMR030420	1.98506	-0.229553	0.702295	0.104529	-0.258112	-0.616902	0.000657765
1529	1	48	25	mMC004607	1810044D09Rik-No acc-mMC004607	1.98489	0.854479	0.999512	0.721755	0.429019	0.420282	0.0157609
6012	2	88	28	mMC008304	9230106D20Rik-NM_177792-mMC008304	1.98481	1.60484	0.42829	0.159394	-0.483854	-0.703212	0.00158834
8556	3	68	12	mMC006259	Hivep3-NM_10657-mMC006259	1.98477	-0.20131	1.83731	-0.0760501	0.255326	-0.489937	0.0166921
10781	4	37	29	mMC012916	Kcnq1-NM_8434-mMC012916	1.98329	0.661528	1.22415	0.239388	0.124154	-0.129151	0.039094
13591	5	17	23	mMC010903	E130101E03Rik-No acc-mMC010903	1.98218	1.17487	-0.359743	-0.434441	1.16052	-0.365528	0.00259485
2969	1	93	25	mMC009103	LOC260408-NM_153172-mMC009103	1.98197	0.692296	0.833786	0.0928548	-0.116573	-0.291998	0.000835734
14585	5	48	25	mMC013727	Spry4-NM_11898-mMC013727	1.98124	0.528721	0.437344	-0.0947249	-0.128234	0.532293	8.08227e-06
13869	5	26	13	mMC011604	Twist2-NM_7855-mMC011604	1.98075	0.234842	0.447229	-0.159098	-0.193226	0.360265	0.00263284
2388	1	75	20	mMC006933	Vps45-NM_13841-mMC006933	1.97984	1.08608	-0.280761	0.662376	0.182293	-0.653991	0.266732
17379	6	28	3	mMC011685	C1qtnf4-NM_26161-mMC011685	1.97788	0.108426	0.0734212	-0.0564939	0.473182	-0.551505	0.00359373
16654	6	5	14	mMC009604	Lancl1-NM_21295-mMC009604	1.97749	-0.481311	0.303365	-0.00465344	-0.239902	-0.634235	0.242741
15279	5	70	15	mMC015803	Fancd2-XM_132796-mMC015803	1.97724	0.298442	0.776996	-0.989663	-0.155418	0.707772	0.00213365
13270	5	7	22	mMC009902	V1re1-NM_134190-mMC009902	1.97617	-0.298057	1.1953	0.0695105	-0.0838949	0.267225	0.0651585
10001	4	13	17	mMC010614	Cyp8b1-NM_10012-mMC010614	1.97613	0.0894161	0.591945	0.150175	0.106937	1.96914	0.114461
16643	6	5	3	mMC009653	Chml-NM_21350-mMC009653	1.97504	1.13923	0.858345	-0.187559	0.298845	-0.181713	0.00650126
11233	4	52	1	mMC014201	Myh10-NM_175260-mMC014201	1.9735	-0.0664762	1.59136	0.880895	1.093	0.595803	0.0751298
15227	5	68	27	mMC015624	Smbp-NM_133352-mMC015624	1.97214	0.668154	0.0771814	-0.0185789	-0.411691	-0.00298297	0.0124352
19091	6	81	19	mMC016973	9630056G07Rik-No acc-mMC016973	1.97213	0.0738702	-0.103473	0.124926	0.290613	-0.91863	0.000443278
9423	3	95	15	mMC009083	Epb7.2-NM_13515-mMC009083	1.97183	-0.404448	0.275663	-0.234769	-0.196218	-0.806489	9.33364e-05
13862	5	26	6	mMC011553	Edem1-NM_138677-mMC011553	1.97105	0.614559	1.2895	0.188911	-1.01197	0.516842	0.00249844
7143	2	20	7	mMC021402	Nt5m-NM_134029-mMC021402	1.97055	0.612158	0.488119	-0.481571	-0.0272102	-0.303147	0.00219742
13769	3	23	9	mMC021754	Rpl39-NM_26055-mMC021754	1.97028	0.341065	0.27713	-0.262684	0.105959	0.225931	9.59e-05
6388	2	100	20	mMC009429	4930403N07Rik-No acc-mMC009429	1.97005	0.195932	1.36186	-0.319872	0.289798	-0.951326	3.3489e-07
5453	2	71	13	mMC006900	Gla-NM_13463-mMC006900	1.9698	-0.275157	-0.217247	0.464171	-0.28413	-0.264001	0.538241
8082	3	53	18	mMC005022	Scnn1a-NM_11324-mMC005022	1.96942	-0.301259	0.79576	-0.298297	-0.197792	-0.778686	3.25954e-05
4521	2	42	9	mMC003898	Esd-NM_16903-mMC003898	1.96775	-0.642587	0.746406	0.238776	-0.197453	-0.588857	0.0209495
13960	5	29	8	mMC012002	6430571L13Rik-NM_175486-mMC012002	1.96772	0.196576	2.0912	-0.305333	-0.297868	-1.20548	7.15858e-10
7097	2	18	25	mMC021207	Olfr403-NM_207622-mMC021207	1.96504	0.854812	0.177748	-0.176866	0.075307	-0.654824	0.00513729
8274	3	59	18	mMC005606	4933407H18Rik-XM_132005-mMC005606	1.96425	0.27916	1.27217	0.0604337	0.157484	-0.090532	0.130458
10141	2	113	29	mMR030484	Sas-NM_25982-mMR030484	1.96411	-0.209867	0.452677	0.674701	-0.27756	0.0428302	0.0384138
7308	3	29	12	mMC002691	Bag3-NM_13863-mMC002691	1.96357	-0.392092	-0.271186	0.0210771	-0.499427	-0.401717	0.429214
2993	1	94	17	mMC008990	Ubn1-XM_489503-mMC008990	1.96353	-0.208766	-1.37083	0.414421	0.146015	-0.629304	0.000770298
3739	1	117	27	mMR030968	Magea3-NM_20017-mMR030968	1.96339	0.506143	0.415816	-0.182902	-0.0706969	-0.0297086	0.0096866
10156	4	18	12	mMC010859	Suclg1-NM_19879-mMC010859	1.96324	0.240035	0.306041	0.130065	-0.37878	1.28288	0.00225854
1938	1	61	18	mMC005982	6330404F12Rik-No acc-mMC005982	1.96315	-0.275299	-0.493485	0.803077	0.0689738	-0.343675	0.111891
6180	2	94	4	mMC008869	D4Ertd196e-NM_25667-mMC008869	1.96252	2.47369	1.29417	-0.159217	-0.363688	-0.215599	7.10445e-09
10423	4	26	23	mMC011679	Tra1-NM_11631-mMC011679	1.96238	0.74297	1.32769	-0.235234	-0.233521	0.483452	3.48959e-05
8069	3	53	5	mMC005041	Rab15-NM_134050-mMC005041	1.96074	0.278826	-1.14604	0.199063	-0.264431	-0.779524	0.181981
16801	6	10	1	mMC010345	D2Ertd217e-No acc-mMC010345	1.96049	1.59172	1.55333	0.0398376	0.110598	0.0866837	0.00622661
14018	3	31	2	mMC022473	LOC260345-No acc-mMC022473	1.95951	0.699609	0.635806	-0.227043	-0.350541	-0.741349	0.000895611
9129	2	82	9	mMR027322	1700006H02Rik-NM_173367-mMR027322	1.95893	0.454787	1.07951	-1.26614	-0.379964	-0.0741659	0.00583577
18621	6	66	29	mMC015700	4732495E13Rik-XM_128300-mMC015700	1.95828	-0.629797	-0.738542	-0.588317	0.0788824	-0.929254	0.00577562
6375	2	100	7	mMC009498	Btg1-NM_7569-mMC009498	1.95387	0.940461	0.998441	0.137812	0.0198331	0.0217881	0.0889251
18754	6	71	2	mMC015945	Mmp9-NM_13599-mMC015945	1.95372	-0.0253025	0.533256	-0.397485	-0.494663	-0.524187	0.00131811
16732	6	7	28	mMC009832	Ddx24-NM_20494-mMC009832	1.9508	-0.102878	0.299495	0.304767	0.00262135	-0.861381	0.247427
10633	4	33	9	mMC012530	Gabpb1-NM_10249-mMC012530	1.94934	-0.054331	0.847372	0.604074	0.258788	-0.37887	0.270359
8996	3	82	4	mMC007997	Fgl1-NM_145594-mMC007997	1.94838	0.995145	1.11922	0.0366224	-0.250158	1.02895	0.241558
14874	5	57	26	mMC014695	4921517J08Rik-XM_128768-mMC014695	1.94806	0.0211636	0.442095	0.371873	-0.422184	-0.232236	0.00992228
4307	2	35	19	mMC003445	Acmsd-No acc-mMC003445	1.94752	-0.410779	0.450204	0.0478588	-0.525675	-0.160582	0.227999
15043	5	63	3	mMC015325	H47-NM_24439-mMC015325	1.94714	0.722425	0.99899	0.157338	-0.145316	-0.733824	0.0103673
9910	2	106	22	mMR029582	Dpysl2-NM_9955-mMR029582	1.94553	-0.317337	0.958739	0.696078	-0.188908	-0.0675973	0.0345556
13737	5	22	9	mMC011194	E130013N09Rik-XM_488964-mMC011194	1.94498	0.753266	1.10944	-0.687488	-0.363056	-0.0379319	0.00361299
2204	1	69	28	mMC006752	D630041K24Rik-XM_126935-mMC006752	1.94487	0.039659	1.21369	-0.0323041	-0.273025	0.244591	0.0017203
13441	3	13	1	mMC020809	Gal3st4-XM_284152-mMC020809	1.94325	-0.332079	-0.512516	0.183113	-0.296993	-0.213413	0.0222319
11667	4	65	19	mMC015629	C330006P03Rik-No acc-mMC015629	1.94294	0.0706261	0.653758	0.27951	0.0482186	-0.227353	0.00168355
11094	4	47	22	mMC013462	Thumpd1-NM_145585-mMC013462	1.9419	-0.316319	0.538909	0.0511558	-0.196406	0.0176813	4.8986e-05
13230	5	6	14	mMC009612	Cdk2-NM_16756-mMC009612	1.94144	0.858583	0.302425	0.0561832	-0.226585	-0.0075226	0.0380845
11872	4	71	32	mMC015768	Olfr1342-NM_146713-mMC015768	1.94082	-0.6797	0.0656678	0.0810534	-0.12098	0.0666443	0.010753
14726	3	53	6	mMC024601	Thra-NM_178060-mMC024601	1.93958	-0.029433	1.24761	-0.258001	0.0417337	-0.151418	0.00173704
13908	5	27	20	mMC011821	AI591476-NM_173406-mMC011821	1.93888	0.27728	0.582075	-0.0693581	0.0643968	1.49002	0.0281219
10005	4	13	21	mMC010638	6530407C02Rik-NM_133853-mMC010638	1.93884	0.102869	0.927383	0.54463	0.281495	-0.288916	0.000902575
1359	1	43	15	mMC003907	Shbg-NM_11367-mMC003907	1.93812	-0.0809763	-0.485695	0.804234	-0.390767	0.320692	0.10102
11121	4	48	17	mMC013798	Ighmbp2-NM_9212-mMC013798	1.93646	-0.161723	0.842567	0.377314	-0.299125	-0.199353	0.000183142
13724	5	21	28	mMC011264	2900064K03Rik-No acc-mMC011264	1.93548	0.223012	-0.264959	0.189403	-0.0253355	-0.327588	0.00348718
13730	3	22	2	mMC021793	Lrsam1-NM_199302-mMC021793	1.93467	0.490806	-0.210686	-0.452482	-0.630637	0.018519	0.00997188
13929	5	28	9	mMC011778	C630035N08Rik-NM_175427-mMC011778	1.93456	-0.0615408	1.07567	-0.684903	-0.193611	0.190257	0.0100627
19035	6	79	27	mMC016768	D130076A03Rik-No acc-mMC016768	1.9343	-0.687348	-1.04077	0.13723	-0.144705	-1.13093	0.0236188
4151	2	30	23	mMC002751	D130004A15Rik-No acc-mMC002751	1.93363	0.933095	0.512436	0.515927	0.60593	-0.800249	0.326941
13824	5	24	32	mMC011352	Gng5-NM_10318-mMC011352	1.9336	0.537757	0.8897	-0.143406	-0.209015	0.421579	1.75086e-05
11487	4	59	31	mMC014688	4833427F10Rik-No acc-mMC014688	1.9336	0.943371	0.811476	0.39001	0.721716	0.145741	0.200525
2186	1	69	10	mMC006746	BC028528-NM_153513-mMC006746	1.93322	-0.0919861	0.410337	0.453893	0.0376816	0.0991899	0.0868745
8707	3	73	3	mMC006965	Aldh6a1-NM_134042-mMC006965	1.9327	-0.0618745	0.353206	0.423631	-0.0798624	1.0152	0.181433
11331	4	55	3	mMC014277	Dusp2-NM_10090-mMC014277	1.93262	1.06302	0.944508	0.574643	-0.0387697	0.345864	0.0293844
15257	5	69	25	mMC015919	Spa17-NM_11449-mMC015919	1.93146	0.0304718	-0.502682	-0.179409	-0.0174162	-0.212947	0.0042341
2695	1	85	7	mMC008330	Itk-NM_10583-mMC008330	1.93136	0.715946	1.4918	0.0350066	-0.209885	1.02195	0.00105591
6084	2	91	4	mMC008773	Fin14-No acc-mMC008773	1.93105	0.211478	0.274468	-0.0333471	-0.759241	0.376619	0.0468101
2583	1	81	23	mMC007927	A430057M04Rik-NM_176925-mMC007927	1.93093	0.434341	0.202467	0.73449	-0.0914237	-0.875253	0.174729
5058	2	59	2	mMC005673	Snrp116-NM_11431-mMC005673	1.92956	0.531476	0.121604	0.681892	-0.199903	-0.522489	0.143905
5789	2	81	29	mMC007828	Rshl1-NM_31255-mMC007828	1.92925	1.35469	0.767846	-0.748015	0.0505389	-1.75972	0.0034406
17056	6	17	32	mMC010760	C130022K22Rik-NM_172730-mMC010760	1.92778	-0.511005	0.330603	0.471528	-0.308206	-0.626462	0.0572864
18792	6	72	8	mMC015858	A630055G03Rik-No acc-mMC015858	1.92745	2.50774	0.742159	-1.05648	0.630461	-0.0623346	0.034591
17763	6	40	3	mMC012837	1110031B06Rik-NM_144521-mMC012837	1.9274	-0.156618	0.0759783	-0.189264	0.0486453	-0.309103	0.0168506
6396	2	100	28	mMC009456	Ccr7-NM_7719-mMC009456	1.92709	-0.750826	0.0831306	0.109516	-0.270825	-1.14047	0.0789716
13190	5	5	6	mMC009721	Kntc2-NM_23294-mMC009721	1.92694	1.23183	0.569526	0.158305	0.00175647	-0.759826	4.51044e-05
17131	6	20	11	mMC010939	Ccl22-NM_9137-mMC010939	1.9255	0.822128	-0.108807	-0.150557	-0.0736067	-0.776732	0.203948
3124	1	98	20	mMC009325	Irx3-NM_8393-mMC009325	1.92513	-1.29147	0.878397	0.117371	-0.181038	-0.362303	0.00837347
16721	6	7	17	mMC009854	A930003A15Rik-No acc-mMC009854	1.924	0.469744	0.331752	0.0455856	0.136336	-1.07832	0.0376079
15186	3	67	18	mMC025958	Srpx2-NM_26838-mMC025958	1.92351	-0.332417	1.26916	-0.23563	0.213505	-0.405689	0.000473015
16956	6	14	28	mMC010688	8430411H09Rik-NM_26813-mMC010688	1.92326	0.0227386	-0.199403	0.481345	0.394125	-0.867243	0.0342413
19288	6	87	24	mMC017511	Gpr43-NM_146187-mMC017511	1.92274	-0.370872	-0.273566	0.389649	0.196489	-0.679817	0.0926414
13741	5	22	13	mMC011220	Slc26a4-NM_11867-mMC011220	1.92232	0.215891	0.922427	-0.461498	0.153687	-0.650223	2.50255e-05
5945	2	86	25	mMC008151	Kin-NM_25280-mMC008151	1.92221	0.108838	-0.127349	-0.0288862	0.119365	-0.292201	3.32775e-05
8807	3	76	7	mMC007098	1700025E21Rik-NM_29373-mMC007098	1.92211	-0.747253	-0.0535709	0.11242	-0.0775484	0.106981	0.538483
13424	5	12	16	mMC010219	Hk1-NM_10438-mMC010219	1.92094	0.742845	0.414068	-0.449117	-0.0886354	-0.248303	0.000224383
15270	5	70	6	mMC015777	AI505012-No acc-mMC015777	1.92049	0.329073	0.45733	-0.102128	0.0353851	-0.788263	0.00448474
9856	4	8	32	mMC009912	Cfh-NM_9888-mMC009912	1.92049	0.24092	0.612776	-0.47555	-0.385394	-0.716285	0.000365927
16835	6	11	3	mMC010237	2900054C01Rik-No acc-mMC010237	1.91989	1.39126	0.186806	-0.0581057	-0.0717686	-0.605521	0.00312565
10353	2	120	17	mMR030982	Acsl4-NM_19477-mMR030982	1.91947	-0.213615	-0.241717	0.455128	-0.148935	0.249561	0.0315784
16011	5	93	11	mMC018219	Ccl17-NM_11332-mMC018219	1.91932	-0.105368	0.286854	0.342192	-0.0192226	0.364788	0.0373854
18142	6	51	30	mMC014052	A130033B22-NM_177825-mMC014052	1.91928	-0.472046	-0.186709	-0.763051	0.20026	-0.342149	0.0198989
9758	4	5	30	mMC009820	Usp21-NM_13919-mMC009820	1.91773	0.685715	1.39249	-0.00809086	0.025962	-0.103735	0.00143754
16549	3	110	5	mMR030289	2410195B05Rik-NM_30241-mMR030289	1.91764	0.776576	1.46081	0.256454	-0.233858	-0.0727435	8.85288e-05
1437	1	45	29	mMC004468	2300003C06Rik-NM_28001-mMC004468	1.91746	0.826631	0.920268	-0.198905	-0.1174	-0.942536	0.000157359
13793	5	24	1	mMC011417	Ccl9-NM_11338-mMC011417	1.91604	0.778599	1.23424	-0.0677197	0.143191	0.928141	0.00186594
8366	3	62	14	mMC006052	1110008L20Rik-NM_28643-mMC006052	1.91537	-0.540626	0.0803551	-0.344867	-0.339652	-0.702683	0.0389907
1439	1	45	31	mMC004496	2400009B08Rik-XM_358687-mMC004496	1.91532	0.765299	0.430835	0.553846	0.0922998	-1.00726	0.0159167
17411	6	29	3	mMC011957	2010012O05Rik-NM_25563-mMC011957	1.91251	-0.138761	-2.01128	-0.190282	0.466834	-0.189039	0.0178708
6543	2	1	15	mMC019731	1110033L15Rik-No acc-mMC019731	1.91235	0.0716621	0.0262748	-0.646941	0.0568662	-0.0634142	0.0472918
10956	4	43	12	mMC013075	2700033H19Rik-No acc-mMC013075	1.9116	0.707201	1.33591	0.336122	0.0903163	0.704489	0.00636804
14673	5	51	17	mMC014174	Ppm1g-NM_8014-mMC014174	1.91084	1.1023	0.934129	0.0369704	0.253118	-0.150348	0.00199345
15862	3	88	22	mMR027766	2900064A13Rik-NM_133749-mMR027766	1.91076	-0.29137	0.209623	0.0342112	-0.373877	-0.552299	0.087613
4522	2	42	10	mMC003874	Polr2k-NM_23127-mMC003874	1.90807	1.22471	-1.01535	0.414025	-0.207672	-0.613315	0.207668
18446	6	61	14	mMC014980	Fbxl10-No acc-mMC014980	1.90802	0.257641	-1.02039	0.83626	0.181751	-1.11276	0.479801
6978	2	15	2	mMC021033	Hdgf-NM_8231-mMC021033	1.90781	1.10195	1.90659	-1.18814	0.29172	-0.859964	0.000997036
2984	1	94	8	mMC008938	Abcg4-NM_138955-mMC008938	1.90767	0.485497	0.995947	0.0557808	-0.135293	0.0785128	0.0110113
6686	2	5	30	mMC020092	Rps17-NM_9092-mMC020092	1.90727	1.77667	1.71785	-0.380223	-0.0440184	0.0479927	0.000672387
18895	6	75	15	mMC016379	D930030D11Rik-NM_177281-mMC016379	1.90633	-1.01492	-0.667402	0.209358	-0.197168	-1.0367	0.00608892
700	1	22	28	mMC002056	9330133O14Rik-NM_176948-mMC002056	1.90625	0.312039	0.880473	0.333868	0.0646688	-0.529983	0.242756
14774	5	54	22	mMC014222	D430019H16Rik-No acc-mMC014222	1.90606	0.494878	0.657797	-0.111613	-0.323778	-0.174676	0.0149759
4679	2	47	7	mMC004594	Alox12e-NM_145684-mMC004594	1.90566	0.468588	-0.198166	0.193523	-0.284264	0.361256	0.00826287
6747	2	7	27	mMC020320	Gtf2f1-NM_133801-mMC020320	1.90515	0.52703	1.1763	-1.28406	0.162968	-0.84988	0.000206686
13620	5	18	20	mMC010765	Cyln2-NM_9990-mMC010765	1.90502	0.81071	-0.421849	-0.168421	-0.0423576	-0.0598147	0.0287344
3719	2	17	7	mMC001706	Nppc-NM_10933-mMC001706	1.90422	0.417823	1.13297	0.653769	-0.559187	-0.162432	0.0114837
17038	6	17	14	mMC010756	1110031I02Rik-NM_25402-mMC010756	1.9036	-0.128531	0.446555	-0.309446	0.185798	-0.444028	4.52254e-06
10084	2	112	4	mMR030189	Rrm2-NM_9104-mMR030189	1.90335	0.790998	0.876188	0.108507	-0.211107	0.396265	0.00365443
9874	4	9	18	mMC010206	1700009N14Rik-XM_131323-mMC010206	1.9031	0.018231	0.943269	0.095195	-0.186167	0.00382211	0.00283018
5900	2	85	12	mMC008163	Krt2-7-NM_33073-mMC008163	1.90113	0.877971	0.857064	0.00918363	-0.421587	0.00811546	0.140284
5885	2	84	29	mMC007940	Msx1-NM_10835-mMC007940	1.90088	-0.442295	-0.599834	-0.106592	-0.294201	-0.245493	0.0104133
9392	3	94	16	mMC009147	Syt3-NM_16663-mMC009147	1.90076	0.832417	1.27674	-0.153198	0.250763	-0.490619	0.00033071
13652	5	19	20	mMC011053	4930455M05Rik-No acc-mMC011053	1.89989	-0.0823565	0.483405	-0.182678	-0.139118	-0.0686926	0.000752854
14023	3	31	7	mMC022546	Gm169-NM_199301-mMC022546	1.89867	0.568483	0.112353	-1.05404	-0.0610756	-0.879129	0.0031531
13661	5	19	29	mMC011100	Tenc1-NM_153533-mMC011100	1.89727	0.19947	0.586456	-0.318632	-0.075185	-0.0401184	0.0025178
17484	6	31	12	mMC012107	Fv1-NM_10244-mMC012107	1.89682	-0.399968	0.258774	0.378373	0.053202	-0.620702	0.00151753
2845	1	89	29	mMC008692	5730585A16Rik-No acc-mMC008692	1.89553	1.21836	1.11528	0.136455	-0.127215	0.121356	6.00475e-05
11035	4	45	27	mMC013688	C1d-NM_20558-mMC013688	1.89538	-0.0768743	0.435704	0.261603	-0.174895	0.228577	0.00699379
10646	4	33	22	mMC012486	2600016J21Rik-NM_133744-mMC012486	1.895	-0.630556	0.564877	0.346074	-0.16823	0.0860391	0.0533385
3318	1	104	22	mMR029494	Igk-C-No acc-mMR029494	1.89291	0.421208	0.571918	-0.075705	0.227424	1.45828	0.0286304
17068	6	18	12	mMC011043	Mat1a-NM_133653-mMC011043	1.89271	0.801482	0.991956	-0.063628	-0.0281107	-0.53778	0.0274988
17513	6	32	9	mMC012066	A530028O18-No acc-mMC012066	1.89175	-0.704553	0.245744	0.127827	-0.0286174	-0.378071	0.0016237
15380	5	73	20	mMC016229	Lipc-NM_8280-mMC016229	1.89154	0.632102	-0.716559	0.209694	-0.617115	1.30852	0.000344042
13740	5	22	12	mMC011147	1700001F22Rik-NM_27036-mMC011147	1.89094	0.633548	-1.4375	-0.374725	-0.184067	0.535284	0.00760134
16773	6	9	5	mMC010033	Crlz1-NM_23054-mMC010033	1.89074	0.615224	0.477445	0.34444	0.084144	-0.520125	0.382045
13290	5	8	10	mMC009834	A630074N13Rik-No acc-mMC009834	1.89023	0.388817	0.237689	-0.27612	-0.179385	-0.395051	0.00370703
7893	2	43	21	mMC023798	Cdh4-NM_9867-mMC023798	1.8901	0.849277	1.41802	-0.566156	0.0780917	0.128176	0.000324456
10293	4	22	21	mMC011318	Dock11-XM_486647-mMC011318	1.88919	0.691661	1.32892	-1.13216	0.923101	0.352049	0.077061
10611	4	32	19	mMC012285	Slc5a2-NM_133254-mMC012285	1.88919	0.0535148	1.23397	0.244314	0.0123958	0.924684	0.000672637
13606	5	18	6	mMC010785	1700058C01Rik-NM_175198-mMC010785	1.88902	0.570219	0.68835	-0.405654	0.190834	-0.131484	0.00505226
4262	2	34	6	mMC003105	Akap2-NM_9649-mMC003105	1.88821	0.795531	-0.155211	0.0830862	-0.441921	-0.387421	0.40344
4383	2	37	31	mMC003632	Upk3b-NM_175309-mMC003632	1.88708	0.591566	0.830868	0.148227	-0.254954	0.184407	0.100735
4072	2	28	8	mMC002514	Rgs3-NM_19492-mMC002514	1.887	0.214998	-0.253936	0.101068	-0.113487	-0.470396	0.00655498
7480	2	30	24	mMC022311	Rab6b-NM_173781-mMC022311	1.8862	0.945196	0.735193	-0.374639	-0.280284	1.3614	0.021751
17876	6	43	20	mMC013261	1700034O15Rik-XM_110591-mMC013261	1.88605	0.910606	0.422225	0.22223	0.158817	-0.234798	0.111567
8803	3	76	3	mMC007077	3526401B18Rik-No acc-mMC007077	1.88495	-0.533744	0.240855	0.277847	-0.10439	-0.457082	0.00189697
9047	3	83	23	mMC007935	9930013L23Rik-NM_30728-mMC007935	1.88494	0.257165	0.922553	0.0323395	-0.483975	1.12365	0.0874124
2877	1	90	29	mMC008604	Nfkbib-NM_10908-mMC008604	1.88411	1.40669	1.27075	0.611275	0.481653	-0.0901888	0.00116552
11473	4	59	17	mMC014662	Def8-NM_54046-mMC014662	1.88267	-0.757134	1.40714	0.378974	0.000741413	-0.0455403	0.00141682
15204	5	68	4	mMC015597	Zfp294-XM_128374-mMC015597	1.88263	0.547973	0.459147	0.275535	0.296286	-0.160524	0.246292
2580	1	81	20	mMC007877	Dctn5-NM_21608-mMC007877	1.88219	0.572133	0.321084	0.316658	-0.169417	0.0282647	0.0778931
6287	2	97	15	mMC009363	1700095J07Rik-No acc-mMC009363	1.88143	0.694257	0.896051	-0.00740136	-0.231824	-0.295046	0.0195001
17515	6	32	11	mMC012091	4930483P17Rik-No acc-mMC012091	1.88139	0.0418285	0.481365	0.213234	0.494256	0.102967	0.00121179
5232	2	64	16	mMC005995	C130023A14Rik-No acc-mMC005995	1.88109	0.733939	-2.28685	-0.187832	-0.263256	-0.101652	2.01048e-07
15209	3	68	9	mMC025890	2610524A10Rik-NM_28258-mMC025890	1.88086	0.379967	1.42873	-0.80738	-0.220142	-0.334372	1.34515e-05
11991	4	75	23	mMC016199	1700019D03Rik-NM_144953-mMC016199	1.88076	0.225591	1.16903	-0.2103	-0.0286562	-0.423938	0.0243927
9675	2	99	11	mMR029171	Kifc5b-No acc-mMR029171	1.88075	0.706748	0.583632	0.195333	0.0577744	-0.251232	0.128979
9821	4	7	29	mMC009668	1700023D08Rik-No acc-mMC009668	1.88073	0.699704	-1.97794	0.121137	0.189297	-0.718939	0.00453551
4485	2	41	5	mMC003985	Bpil1-NM_25631-mMC003985	1.88045	1.67768	0.493536	-0.00550566	-0.193654	-0.387998	0.00268788
11030	4	45	22	mMC013638	9130009M17Rik-No acc-mMC013638	1.88033	0.554485	-0.429425	0.165972	-0.314915	0.147264	1.13601e-05
17187	6	22	3	mMC011477	Fkbp1a-NM_8019-mMC011477	1.87976	-0.314303	-0.296943	-0.126812	-0.156904	-0.229291	0.678463
18114	6	51	2	mMC014025	9130207N01-NM_177605-mMC014025	1.87917	-0.155661	0.74147	0.380527	0.0426011	-0.396573	0.000989767
13667	5	20	3	mMC011013	Hfe-NM_10424-mMC011013	1.87883	0.765969	0.203497	-0.0785025	0.195272	-0.814332	7.09641e-05
10846	4	39	30	mMC012716	6430517E21Rik-NM_207583-mMC012716	1.87864	0.675825	0.442558	-0.00942911	-0.236235	1.09757	0.000213226
14569	3	48	9	mMC023970	Actl6a-NM_19673-mMC023970	1.87846	-0.197058	0.0906527	-0.267434	-0.440843	-0.824279	2.87072e-05
7506	2	31	18	mMC022598	H2-Q8-NM_23124-mMC022598	1.87834	0.531808	0.519175	-0.335317	-0.315806	0.361056	0.0331497
14178	5	36	2	mMC012497	4930500F10Rik-No acc-mMC012497	1.87807	-0.105778	1.07574	-0.152333	-0.0285979	-0.292273	0.000687772
701	1	22	29	mMC002076	E2f7-NM_178609-mMC002076	1.87806	0.619933	0.451001	0.550715	-0.29135	-0.469136	0.479656
13980	5	29	28	mMC012032	1700084E18Rik-No acc-mMC012032	1.87736	0.732099	1.07373	-0.346821	0.404522	-0.666196	0.000107993
4528	2	42	16	mMC003875	Ctsz-NM_22325-mMC003875	1.87671	1.75979	-1.01421	0.331771	0.175441	-0.0758394	2.47706e-06
15494	5	77	6	mMC016633	Fnta-NM_8033-mMC016633	1.8761	0.484504	0.971691	0.765366	0.271053	-0.175993	0.0119664
18876	6	74	28	mMC016448	Hexa-NM_10421-mMC016448	1.87576	-1.81426	0.0211673	-0.0888646	0.0425076	-0.425956	0.105369
12368	4	87	16	mMC017323	2310066I10Rik-XM_284376-mMC017323	1.87564	0.144721	0.848596	0.16662	0.775401	-0.24279	0.00242699
1799	1	57	7	mMC005642	Birc7-XM_283820-mMC005642	1.87541	0.425817	0.127273	0.582917	-0.279342	0.437621	0.0197561
10265	4	21	25	mMC011407	Chchd1-NM_25366-mMC011407	1.87469	0.0516323	0.942627	0.444518	-0.235579	0.384624	0.543484
14947	5	60	3	mMC014853	Tec-NM_13689-mMC014853	1.87425	0.501198	0.794401	0.345326	0.194907	-0.175521	0.0204427
18186	6	53	10	mMC014234	Olfr156-NM_19474-mMC014234	1.87287	-0.227206	0.604979	0.353565	-0.0788175	-0.791219	0.00112391
593	1	19	17	mMC001606	5730509C05Rik-NM_197940-mMC001606	1.87254	0.265832	0.628365	0.612632	-0.305741	-0.311122	0.11591
3033	1	95	25	mMC008927	A730091E23Rik-No acc-mMC008927	1.87221	1.34009	0.791888	0.652024	-0.197027	-0.0114709	0.00774559
17347	6	27	3	mMC011773	C530050I23Rik-No acc-mMC011773	1.87153	0.29658	0.707629	0.0696693	0.0263098	-0.40296	0.0608844
1433	1	45	25	mMC004495	Epb4.1l1-XM_487678-mMC004495	1.87151	0.688082	-0.0850751	0.57958	-0.369798	-0.385972	0.166553
13229	5	6	13	mMC009684	Tbc1d13-NM_146252-mMC009684	1.87094	0.590941	1.11843	-0.0251408	-0.0540179	-0.0201015	0.0236296
9082	2	80	26	mMR027095	Tsc1-NM_22887-mMR027095	1.87029	1.41408	1.67809	-0.234262	0.226014	-0.537206	0.000700319
7697	2	37	17	mMC023190	Fth1-NM_10239-mMC023190	1.86934	1.07588	1.69409	-0.887376	-0.284884	-0.170597	1.14857e-06
13887	5	26	31	mMC011608	Gabt4-NM_172890-mMC011608	1.86894	0.70455	0.811838	-0.087129	0.144325	-0.881164	0.00434383
17122	6	20	2	mMC010865	Rbpms2-NM_28030-mMC010865	1.86871	-0.574174	0.12832	-0.283499	-0.37522	-0.268136	0.62113
9961	2	108	9	mMR029826	3010027C24Rik-No acc-mMR029826	1.86853	0.814372	1.50243	-0.624403	-0.140253	-0.529152	0.000924434
1976	1	62	24	mMC005895	Ezh1-NM_7970-mMC005895	1.86848	0.163562	0.775031	-0.0774872	0.0843452	-0.78013	0.274102
14399	5	42	31	mMC013144	Lrp4-NM_172668-mMC013144	1.86812	-0.298267	0.627183	0.283924	0.0447247	-0.626997	0.00974698
6190	2	94	14	mMC008844	1700058P15Rik-No acc-mMC008844	1.86767	0.413756	0.90696	0.17425	-0.159888	-0.0884809	7.67175e-05
13300	3	8	20	mMC020085	Apoe-NM_9696-mMC020085	1.86765	1.59929	1.68425	-0.571729	0.654573	0.434748	0.0336339
11936	4	73	32	mMC016328	Cd79b-NM_8339-mMC016328	1.86707	-0.496891	-0.0946651	0.43239	-0.080244	-0.0821426	0.00189006
4569	2	43	25	mMC004215	Igl-V1-No acc-mMC004215	1.86613	0.861939	-2.67956	-0.0288947	0.0692654	-0.677947	0.000155796
5685	2	78	21	mMC007382	Phf15-NM_199299-mMC007382	1.86576	1.20194	-1.32705	-0.112969	0.23949	-0.469578	0.0358508
3182	1	100	14	mMC009524	Olfr29-ps1-No acc-mMC009524	1.86562	-0.152984	-1.75208	0.493539	-0.124576	0.0999107	0.0079549
15451	5	75	27	mMC016480	Cxcr3-NM_9910-mMC016480	1.86517	-0.033197	0.00968783	-0.0185778	-0.361688	-0.478275	0.0134868
17637	6	36	5	mMC012449	1810032O08Rik-NM_25472-mMC012449	1.86481	-0.104368	-1.11203	-0.0995632	0.0633425	0.0939943	0.107791
6389	2	100	21	mMC009502	Dpagt1-NM_7875-mMC009502	1.86438	0.625772	-0.428975	-0.171619	-0.138876	-0.455717	0.00022254
18221	6	54	13	mMC014572	Fbxw2-NM_13890-mMC014572	1.86427	-0.739999	-0.763228	0.371765	-0.0936995	-0.847468	0.0831367
19152	6	83	16	mMC017123	Ars2-NM_31405-mMC017123	1.86251	-0.343281	-0.0649654	-0.563982	0.197399	-1.0176	0.00848856
2730	1	86	10	mMC008194	Olfr1402-NM_146275-mMC008194	1.86246	0.922015	-0.157778	-0.117829	0.16225	-0.314455	0.961963
17053	6	17	29	mMC010804	AW822216-NM_178884-mMC010804	1.86166	-0.4902	-0.558759	0.481783	0.204812	-0.787255	0.342093
8087	3	53	23	mMC005047	Krt1-24-NM_16880-mMC005047	1.86131	0.2885	0.254156	-0.38585	-0.176736	-0.42853	0.12716
798	1	25	30	mMC002524	Padi1-NM_11059-mMC002524	1.85894	0.752446	-0.267401	-0.106387	-0.166432	-0.853154	0.00933102
3955	2	24	19	mMC002205	4930479M11Rik-NM_183108-mMC002205	1.85864	-0.393433	0.118736	0.497191	-0.26287	0.219139	0.0400967
9451	2	92	11	mMR028315	mt-Nd4-No acc-mMR028315	1.85745	0.884783	1.4148	-0.0411066	0.0928792	0.275	0.00126083
1490	1	47	18	mMC004270	2700088M07Rik-No acc-mMC004270	1.85732	0.64969	0.204875	0.593141	0.177959	-0.74191	0.170032
7601	2	34	17	mMC022718	Ugt1a13-NM_201641-mMC022718	1.85646	0.108423	1.31661	-0.576219	-0.597621	-0.321125	0.00435357
9908	4	10	20	mMC010093	1810065E05Rik-NM_27239-mMC010093	1.85576	0.0384267	0.695507	0.251866	-0.029906	-0.269355	0.00274642
19182	6	84	14	mMC017012	Cet1-No acc-mMC017012	1.85559	-0.717218	0.264234	-0.0281098	0.0348071	-0.375696	0.149151
3058	1	96	18	mMC009166	4930537H20Rik-No acc-mMC009166	1.85509	0.155595	0.619695	0.13331	-0.250433	0.107468	0.000239869
14897	5	58	17	mMC014654	Gpr49-NM_10195-mMC014654	1.85482	-0.839409	-0.438879	0.208104	-0.130668	0.0270704	0.00081716
2456	1	77	24	mMC007519	Mpv17l-NM_33564-mMC007519	1.85323	0.456064	1.47318	0.507631	-0.161908	0.0648785	0.000762692
3502	2	10	14	mMC000780	Penk1-NM_1002927-mMC000780	1.85097	0.444853	1.13353	0.586973	-0.242794	-0.0957423	0.44919
2222	1	70	14	mMC006636	Hpxn-NM_17371-mMC006636	1.85058	2.23955	2.56775	-0.723378	1.13972	-0.330301	0.00480408
14595	5	49	3	mMC013973	Pdcd2-NM_8799-mMC013973	1.85003	0.651986	0.451576	-0.0991721	0.282401	-0.196823	0.0163696
10435	4	27	3	mMC011589	Cspg5-NM_13884-mMC011589	1.84976	0.613116	1.49767	0.514975	0.335983	0.15758	0.00549987
2801	1	88	17	mMC008422	Fthfd-NM_27406-mMC008422	1.8496	0.606164	0.125476	0.141583	0.156726	-1.23642	0.000148414
2555	1	80	27	mMR027240	Cyp3a44-NM_177380-mMR027240	1.8489	1.08478	1.18971	-1.26277	-1.45597	0.394691	0.000650231
17587	6	34	19	mMC012653	Hcngp-NM_20483-mMC012653	1.84878	0.501978	1.30867	0.365368	0.0803823	-0.0605043	0.0129062
11129	4	48	25	mMC013823	6330509G02Rik-NM_172946-mMC013823	1.84812	0.891899	0.807187	0.239989	0.114222	0.9224	0.0661816
14756	5	54	4	mMC014245	Tle3-NM_9389-mMC014245	1.84719	0.359604	0.679976	-0.154088	0.172814	0.215497	0.0964401
7533	2	32	13	mMC022556	BC060615-NM_198423-mMC022556	1.84703	0.705511	0.796646	-0.762201	-0.398793	0.348918	1.15706e-05
15172	5	67	4	mMC015685	2310075G12Rik-NM_27162-mMC015685	1.84701	0.345678	0.943934	0.527751	-0.261166	0.348757	0.0129681
18100	6	50	20	mMC014117	4921517L17Rik-XM_130609-mMC014117	1.84483	-0.182331	0.0962611	0.314747	0.393623	-1.11278	0.0037644
8690	3	72	18	mMC006670	9430014N10Rik-No acc-mMC006670	1.84409	-0.568917	0.563953	-0.288379	-0.211016	-0.573488	0.0234312
14090	5	33	10	mMC012410	Mkl1-NM_153049-mMC012410	1.84325	0.121613	-0.424661	-0.71217	0.233472	0.0658864	0.00201317
15584	5	79	32	mMC016816	9630054F20Rik-NM_173784-mMC016816	1.84048	-0.628297	-0.282852	0.418373	-0.119864	-0.255845	0.30359
13449	5	13	9	mMC010514	Tgm1-NM_19984-mMC010514	1.84013	0.394987	1.61576	-0.393922	-0.24854	-1.49324	8.88131e-06
11702	4	66	22	mMC015470	5530402G07Rik-No acc-mMC015470	1.83955	-0.0793713	0.981505	0.488156	0.653296	0.626361	7.91344e-05
15147	5	66	11	mMC015443	Parvg-NM_22321-mMC015443	1.83946	0.573538	1.54085	-0.588882	-0.481692	1.22077	0.00379006
19024	6	79	16	mMC016739	Gpx7-NM_24198-mMC016739	1.83945	-0.153058	-0.397892	-0.146438	0.227078	-0.867442	0.00742378
10132	4	17	20	mMC010949	2200002K05Rik-XM_134642-mMC010949	1.83921	-0.416808	0.56267	0.379794	-0.223139	0.390589	0.0971566
4006	2	26	6	mMC002337	Sncg-NM_11430-mMC002337	1.83715	1.40628	0.81619	0.442893	0.481635	-0.683584	0.0391654
4119	2	29	23	mMC002839	Kelchl-NM_145479-mMC002839	1.83574	0.527845	0.500824	0.180703	-0.261411	-0.583576	0.272976
5541	2	74	5	mMC006969	Capn12-NM_21894-mMC006969	1.83568	0.370658	0.850628	0.560116	0.0882251	-0.231755	0.0681237
10469	4	28	5	mMC011873	Sec8l1-NM_9148-mMC011873	1.83541	-0.354737	0.852286	0.308635	-0.235878	0.421558	0.0689533
16823	6	10	23	mMC010327	4833438C02Rik-No acc-mMC010327	1.83516	0.292537	0.469877	0.000402429	0.113414	-1.26776	0.0170006
17656	6	36	24	mMC012431	1700013N06Rik-No acc-mMC012431	1.83342	0.00616032	0.465202	0.589862	-0.299881	-0.490062	0.350289
19190	6	84	22	mMC017014	E030049G20Rik-NM_172484-mMC017014	1.83303	0.055279	0.346647	0.216103	0.209665	-0.82283	0.0114311
16907	6	13	11	mMC010443	Nme6-NM_18757-mMC010443	1.8324	-0.0380627	0.243937	-0.0228672	0.383863	-0.437041	0.000725492
4660	2	46	20	mMC004237	Leap2-NM_153069-mMC004237	1.83192	1.04674	0.324662	0.224395	-0.162167	0.477332	0.0269919
2770	1	87	18	mMC008110	Hint2-XM_143732-mMC008110	1.8316	0.404603	0.481008	0.423571	0.218294	-0.0270316	0.0133984
3189	1	100	21	mMC009598	Kirrel1-NM_130867-mMC009598	1.83057	0.548834	-0.143356	0.37902	-0.0106246	-0.89812	0.000535345
10251	4	21	11	mMC011403	Eef1a2-NM_7906-mMC011403	1.82776	0.774489	2.00586	-0.154443	-0.192266	-0.482622	2.92874e-05
14102	5	33	22	mMC012390	Grim19-NM_23312-mMC012390	1.82772	0.131672	0.776056	-0.254517	-0.281527	-0.367448	6.05334e-07
7474	3	34	18	mMC003390	1700007L07Rik-No acc-mMC003390	1.82641	0.613016	0.432999	-0.320405	0.0160447	-0.261547	0.00563362
5545	2	74	9	mMC006970	2610511E22Rik-NM_29649-mMC006970	1.82608	0.943837	0.212263	0.218892	0.416536	-0.297452	0.542126
2199	1	69	23	mMC006775	Olfr702-NM_146597-mMC006775	1.82551	0.118416	1.25649	0.362764	-0.30484	0.269388	0.0035443
8650	3	71	10	mMC006754	Dm15-NM_32418-mMC006754	1.82535	0.384014	0.774493	0.129154	-0.237623	0.544622	0.0546667
1705	1	54	9	mMC005146	Afg3l2-XM_128950-mMC005146	1.82481	0.769969	0.864641	0.230321	-0.157444	-0.817575	0.00973991
8518	2	63	6	mMC025665	Ldh1-NM_10699-mMC025665	1.82414	0.833798	0.513095	-0.580856	-0.136855	1.40777	0.0334249
2999	1	94	23	mMC008991	E430012K20Rik-XM_130845-mMC008991	1.82394	0.843109	0.790887	0.013308	-0.223855	0.217641	0.00105508
14851	5	57	3	mMC014741	Tnfsf14-NM_19418-mMC014741	1.82384	0.481089	0.455359	0.310854	0.258659	-0.0695965	0.162777
7354	2	26	26	mMC021903	37135-NM_17461-mMC021903	1.82306	1.40359	-0.0200581	-0.757929	0.571038	-0.771614	0.117344
17073	6	18	17	mMC011094	Gsta3-NM_10356-mMC011094	1.82217	1.07334	0.51172	-0.206313	-0.152315	0.847393	0.00176458
13186	5	5	2	mMC009697	Tada3l-NM_133932-mMC009697	1.82022	0.11901	-0.565881	0.209992	-0.318993	-0.51953	0.0763164
1812	1	57	20	mMC005573	6030419C18Rik-NM_176921-mMC005573	1.81992	0.478834	0.677081	0.835543	-0.107091	-0.158995	0.0990199
13995	5	30	11	mMC011987	C1qtnf3-NM_30888-mMC011987	1.81987	0.317377	0.769081	-0.511965	-0.128928	-0.225617	0.000796066
15230	5	68	30	mMC015596	1700104L18Rik-No acc-mMC015596	1.81936	0.782349	0.983981	-0.418153	-0.204339	0.70015	0.000514752
847	1	27	15	mMC002371	Lypla3-NM_133792-mMC002371	1.81892	0.523014	0.289284	0.562126	-0.195551	-0.0323863	0.67383
160	1	5	32	mMC020168	Pfdn2-NM_11070-mMC020168	1.81812	0.561534	0.939275	-0.889787	-0.180033	-1.24168	0.027798
7864	2	42	24	mMC023463	Tcfap2c-NM_9335-mMC023463	1.81767	0.0127962	0.752981	-1.06137	-0.523987	0.00673444	0.000430132
10879	4	40	31	mMC013056	2010308F09Rik-No acc-mMC013056	1.81494	0.53238	0.575623	-0.0436351	-0.346878	0.885398	0.00859908
7286	3	28	22	mMC002422	Slc35d2-NM_1001321-mMC002422	1.81389	-1.58688	-0.544329	0.376127	-0.252835	-0.229211	0.100931
10464	4	27	32	mMC011544	Olfr1216-NM_146893-mMC011544	1.81386	-0.096129	-1.43639	-0.0607927	0.0526751	0.607334	0.00118786
1035	1	33	11	mMC003339	Fdps-NM_134469-mMC003339	1.81342	0.0298866	0.865731	0.826519	-0.515019	0.171078	0.157801
14742	5	53	22	mMC014310	Zp1-NM_9580-mMC014310	1.81274	0.799182	0.764207	-0.260917	-0.101104	-0.274678	5.41844e-06
13854	5	25	30	mMC011644	C330022C24Rik-No acc-mMC011644	1.81266	-0.276116	1.04124	-0.288992	-0.275188	0.413206	0.0097483
13986	5	30	2	mMC011913	BC060631-NM_177700-mMC011913	1.81155	0.272563	0.111692	-0.647719	0.166256	-0.00252033	0.0369941
13920	5	27	32	mMC011824	Cyld-NM_173369-mMC011824	1.81105	0.499737	1.11784	-0.0406038	-0.0167793	-0.838537	7.02039e-06
18407	6	60	7	mMC014778	9830132G07Rik-NM_172643-mMC014778	1.81036	-0.0976957	-0.178227	0.174427	-0.292745	-0.564907	0.0739552
3941	2	24	5	mMC002177	4931406O17Rik-XM_486260-mMC002177	1.81007	0.889349	1.30654	0.460612	-0.0485872	-0.899844	0.199808
19228	6	85	28	mMC017312	6330407A03Rik-No acc-mMC017312	1.81006	-0.428678	0.0088599	0.192619	0.0751645	-0.575303	0.0222608
13195	5	5	11	mMC009771	Irf2bp1-NM_178757-mMC009771	1.80842	0.637528	1.32365	0.241289	-0.147811	0.0125492	0.00735678
14622	5	49	30	mMC013948	Blmh-NM_178645-mMC013948	1.80799	-0.0840509	-0.242309	0.112486	-0.166557	0.360225	0.212226
10672	4	34	16	mMC012419	4921511H13Rik-XM_128377-mMC012419	1.80792	-0.268462	0.579601	0.602446	0.0655808	0.10887	0.184878
7672	2	36	24	mMC022895	Mrpl17-NM_25301-mMC022895	1.80646	0.624476	0.670468	-1.20004	-0.240294	0.0366532	0.00492511
13634	5	19	2	mMC011049	Prdx4-NM_16764-mMC011049	1.80487	0.937808	1.31831	-0.133736	0.306536	0.419478	2.84539e-06
13185	5	5	1	mMC009769	4930503E24Rik-XM_125917-mMC009769	1.8047	-0.419679	0.299175	-0.453024	-0.581777	-0.00749956	0.0219578
11246	4	52	14	mMC014132	2300009A05Rik-XM_204313-mMC014132	1.80454	0.233859	1.54923	0.897312	0.12449	0.797401	0.042402
17034	6	17	10	mMC010778	1810073G14Rik-NM_26342-mMC010778	1.80343	0.271218	0.626169	0.380687	0.00234383	-0.231685	0.234411
13414	5	12	6	mMC010217	2310039L15Rik-XM_196011-mMC010217	1.80318	0.90332	1.12947	-0.451206	-0.267202	0.4732	4.37358e-05
15507	5	77	19	mMC016685	A830012C17Rik-No acc-mMC016685	1.80256	-0.289906	-0.146937	0.105836	-0.0923062	-0.362216	0.00024568
14672	5	51	16	mMC014147	Hrnr-NM_133698-mMC014147	1.80243	0.955176	0.256521	0.232885	-0.332147	0.2692	0.000124704
17346	6	27	2	mMC011721	Coro1a-NM_9898-mMC011721	1.80237	0.162061	-0.298945	-0.284476	0.504918	-0.887048	0.126406
13498	5	14	26	mMC010383	BC057079-XM_283973-mMC010383	1.80171	0.568537	1.13753	-0.297917	0.232546	-0.283707	5.90134e-06
9941	2	107	21	mMR029942	2310001H12Rik-NM_145563-mMR029942	1.80074	0.230848	0.48566	0.144226	-0.487661	-0.306716	0.000134985
17434	6	29	26	mMC011911	A830025M08-No acc-mMC011911	1.80049	0.245321	0.667133	0.0337144	0.248648	-0.363814	0.0636306
7190	2	21	22	mMC021606	Rps27-NM_27015-mMC021606	1.79981	-0.120906	1.77592	-1.76949	-0.508775	0.600379	0.484132
14153	5	35	9	mMC012634	5730568A12Rik-NM_25689-mMC012634	1.79885	0.658958	1.14943	-0.673952	0.226997	-0.479126	6.18939e-05
13091	3	2	3	mMC019925	Serf2-NM_11354-mMC019925	1.79571	0.0704654	-0.351671	-0.551484	-0.530427	0.315042	0.00384393
18872	6	74	24	mMC016447	Acads-NM_7383-mMC016447	1.79561	0.628827	0.510407	-1.12429	0.878438	-1.19104	0.000177842
18897	6	75	17	mMC016382	Olfr13-NM_146652-mMC016382	1.79506	0.387448	0.00124267	0.0446594	-0.330503	-0.813018	0.00628589
11970	4	75	2	mMC016145	Tm4sf5-NM_29360-mMC016145	1.79294	-0.575752	1.00393	0.530335	0.255588	-0.0245725	0.0161709
1141	1	36	21	mMC003454	Zim1-NM_11769-mMC003454	1.79288	0.648251	-1.20055	0.0652764	-0.529256	-0.490505	0.95354
19121	6	82	17	mMC017238	Dbr1-NM_31403-mMC017238	1.79262	-0.108408	0.438291	-0.540194	0.501787	-0.808474	0.0804958
18199	6	53	23	mMC014263	9430096G21Rik-No acc-mMC014263	1.79201	-0.208781	-0.378441	0.589892	0.525846	-0.623717	0.631002
13523	5	15	19	mMC010741	1700008D07Rik-XM_485969-mMC010741	1.7912	0.263849	0.656729	0.180655	0.138925	0.477365	0.00570807
8458	2	61	10	mMC025466	9430067K09Rik-No acc-mMC025466	1.7907	-0.116365	1.09272	0.833394	-0.0122227	-0.285494	0.960521
14280	5	39	8	mMC012970	Cpsf2-NM_16856-mMC012970	1.79026	-0.209457	0.661121	0.167555	0.337631	0.0184981	0.00301623
17868	6	43	12	mMC013259	2410075B13Rik-NM_146059-mMC013259	1.78942	0.52739	0.402889	-0.311365	0.0628697	-0.744554	0.0123912
14865	5	57	17	mMC014742	Ap3b2-NM_21492-mMC014742	1.78933	0.911429	0.883344	0.172774	0.144597	0.39945	0.00478174
10159	4	18	15	mMC010907	Pcx-NM_8797-mMC010907	1.78819	0.612407	1.67098	-0.285122	-0.0328553	0.708339	0.00116431
14404	5	43	4	mMC013381	Sirt4-XM_485674-mMC013381	1.78686	0.423328	0.971673	0.0106325	-0.571037	0.146773	0.0495528
11853	4	71	13	mMC015836	Dnajc5-NM_16775-mMC015836	1.78626	0.00598904	0.842524	0.354007	0.0992337	0.276471	0.0977227
18185	6	53	9	mMC014258	Herpud1-NM_22331-mMC014258	1.78402	-0.551814	0.747701	-0.182688	0.05707	-0.566745	0.0164797
8904	3	79	8	mMC007498	Mrpl24-NM_26591-mMC007498	1.78281	0.211244	0.545744	-0.134811	-0.334773	-0.476392	0.0530463
1241	1	39	25	mMC003551	Kif2b-XM_126653-mMC003551	1.78244	0.953455	0.830287	0.651802	0.25575	-0.28425	0.130205
3687	2	16	7	mMR001434	1810043M20Rik-BC050871-mMR001434	1.78166	0.564482	1.27639	0.0424555	-0.156249	-0.138079	0.0603312
13369	5	10	25	mMC010071	A930003K04Rik-No acc-mMC010071	1.78144	-0.0657558	0.792995	-0.300314	-0.265518	-0.171293	0.00212454
10051	2	111	3	mMR030301	Rdh1-NM_80436-mMR030301	1.78131	0.263434	0.871416	-0.133248	-0.468901	0.201174	0.00782362
19155	6	83	19	mMC017173	1700034B16Rik-No acc-mMC017173	1.78129	-0.0301561	-0.424566	0.296839	0.185181	-2.36782	0.000893304
17107	6	19	19	mMC011029	4933411K16Rik-No acc-mMC011029	1.78093	0.655747	0.118614	-0.0502288	0.186617	-0.758653	0.134687
4265	2	34	9	mMC003130	Gnat2-NM_8141-mMC003130	1.78051	0.747198	1.66399	0.0406255	-0.0900419	-0.417295	0.00851316
7712	3	41	32	mMC003848	B230209C24Rik-NM_177235-mMC003848	1.78037	-0.931857	-0.330095	0.892677	0.110453	-0.625967	0.000226327
14900	5	58	20	mMC014605	Nctc1-XM_489213-mMC014605	1.78025	0.376513	0.554588	0.0879378	-0.18089	-0.0192898	0.000148451
13379	5	11	3	mMC010333	Map3k5-NM_8580-mMC010333	1.77969	1.63835	0.703977	0.0384246	0.110401	0.475194	0.000290111
11821	4	70	13	mMC015924	B230315M08Rik-NM_170758-mMC015924	1.77888	-0.266057	0.617482	0.434175	0.012743	0.442645	0.348936
6722	3	11	2	mMC000969	Aurkb-NM_11496-mMC000969	1.7782	0.122909	0.974868	0.657045	-0.494932	0.0813176	0.0527756
9257	2	86	9	mMR027706	Rpl27a-NM_11975-mMR027706	1.77792	0.218117	1.11723	-0.692748	-0.435113	-0.468379	0.00452006
11385	4	56	25	mMC014591	1700016F23Rik-NM_29064-mMC014591	1.77787	-0.0942501	0.947899	0.0255488	0.227313	-0.22516	0.0422168
1459	1	46	19	mMC004405	Ank1-NM_31158-mMC004405	1.7773	0.860842	0.438098	-0.0452195	-6.68267e-05	-0.630232	0.012096
19294	6	87	30	mMC017508	Atpaf1-NM_181040-mMC017508	1.77678	-0.134463	-1.393	-0.0172809	0.0182369	-1.3413	0.0108446
17066	6	18	10	mMC011066	Tmem8-NM_21793-mMC011066	1.77611	0.629734	1.03284	-0.156364	0.176478	-0.195936	0.00041068
3054	1	96	14	mMC009140	D930030I03Rik-No acc-mMC009140	1.77493	0.695808	1.22077	-0.200589	-0.254505	0.101593	1.22045e-05
9100	3	85	12	mMC008067	B930086A06Rik-NM_177207-mMC008067	1.77305	0.675627	1.00298	-0.255474	0.105908	-0.427071	0.00119872
14748	5	53	28	mMC014336	1700060L04Rik-No acc-mMC014336	1.77289	1.27913	1.44287	-0.176268	0.301755	-0.196484	3.53009e-05
10454	4	27	22	mMC011542	4932439E07Rik-No acc-mMC011542	1.7725	0.428844	1.23895	-0.0105456	-0.194789	0.375342	0.031534
10486	4	28	22	mMC011830	Ear5-NM_19398-mMC011830	1.77236	1.07555	0.637249	0.569284	-0.103091	0.93766	0.198459
18935	6	76	23	mMC016295	Eya1-NM_10164-mMC016295	1.77216	0.312347	-0.289163	-0.292296	-0.0731185	0.808	0.167595
15150	5	66	14	mMC015372	2300008B03Rik-NM_175106-mMC015372	1.77213	0.144073	0.428678	0.0518415	0.342809	-0.267209	0.0178153
8115	2	50	19	mMC024277	Hmga2-ps1-No acc-mMC024277	1.77145	0.957755	1.14615	-0.0951704	0.540694	-0.453646	0.00202523
15716	5	84	4	mMC017133	9330136K24Rik-No acc-mMC017133	1.77126	-1.22882	0.982568	0.248743	-0.126668	0.488924	0.0210099
19725	6	101	13	mMC018892	C030004G16Rik-No acc-mMC018892	1.77	0.198225	0.25511	0.584171	0.0142701	0.533068	0.0489335
1696	1	53	32	mMC005192	Grb7-NM_10346-mMC005192	1.76984	0.318765	-0.190006	-0.204551	-0.0149046	0.00980368	0.592638
5611	2	76	11	mMC007195	C030002N13Rik-NM_145550-mMC007195	1.76926	0.508714	1.08496	0.433248	-0.220566	0.0573097	0.153244
18279	6	56	7	mMC014394	Hspa1b-No acc-mMC014394	1.76892	-0.0440177	0.595593	0.175865	-0.335373	-0.925233	7.02912e-05
6149	2	93	5	mMC008977	Tekt2-NM_11902-mMC008977	1.76886	0.727342	0.735452	-0.258978	-0.231353	0.238533	0.00288245
380	1	12	28	mMC001104	Mrps18b-NM_25878-mMC001104	1.76868	-0.0180948	0.49696	0.831609	-0.385013	-0.038701	0.824572
1964	1	62	12	mMC005867	Atf6-XM_129579-mMC005867	1.76782	0.00237027	-0.484907	-0.0540846	-0.379355	-0.199334	0.745819
13722	5	21	26	mMC011239	1700042G07Rik-XM_149454-mMC011239	1.76446	0.725221	0.855836	-0.45692	-0.219153	-0.0980652	0.0183814
1727	1	54	31	mMC005176	Avpi1-NM_27106-mMC005176	1.76383	1.35497	1.02246	0.245478	0.0391511	-0.61744	1.04532e-05
10573	4	31	13	mMC011996	Cnnm1-NM_31396-mMC011996	1.76354	0.647706	0.701788	0.330522	-0.00643265	0.339229	0.0684634
13657	5	19	25	mMC011127	Ly6g6e-NM_1003720-mMC011127	1.76249	0.666488	1.08825	-0.613632	0.00741921	-0.0694905	0.000368817
17792	6	40	32	mMC012792	4732472I07Rik-XM_195168-mMC012792	1.76222	-0.143651	0.517711	0.15238	0.18717	-0.369493	0.13036
11045	4	46	5	mMC013593	9030024J15Rik-No acc-mMC013593	1.76172	0.708422	1.0776	0.134726	0.0943348	0.400363	0.107772
8566	3	68	22	mMC006262	1700019O17Rik-XM_484891-mMC006262	1.76146	-0.0149058	1.10659	0.605618	-0.29879	0.300442	0.356758
7587	3	38	3	mMC003797	4930570D08Rik-No acc-mMC003797	1.76074	-0.282577	-0.744177	-0.127825	-0.34205	-0.216617	0.00237237
18102	6	50	22	mMC014118	9330128H10Rik-NM_175678-mMC014118	1.76032	-0.178156	-0.32484	0.142785	0.0521609	-0.509556	0.164259
14069	5	32	21	mMC012190	Agc1-NM_7424-mMC012190	1.75907	0.533053	1.05364	-0.536101	-0.00513306	-0.776586	5.89492e-06
3035	1	95	27	mMC008904	Col4a2-NM_9932-mMC008904	1.75689	0.615291	1.21401	0.360486	-0.0100136	0.119391	0.000277074
13435	5	12	27	mMC010248	6030451C04Rik-No acc-mMC010248	1.75635	-0.130401	0.320104	-0.448582	-0.208131	0.547687	0.00166504
859	1	27	27	mMC002376	Lhx2-NM_10710-mMC002376	1.75627	0.95536	0.817959	0.366025	-0.140692	-0.269306	0.205392
7421	3	32	29	mMC002852	Scn3a-XM_141275-mMC002852	1.75534	-0.829421	-0.407049	0.562246	-0.044257	-1.11538	0.68248
8757	3	74	21	mMC007278	6820424L24Rik-XM_144310-mMC007278	1.75495	0.583937	0.0454803	0.0297138	-0.126689	-0.548048	0.0229242
13817	5	24	25	mMC011423	1700010L19Rik-XM_128462-mMC011423	1.75444	0.670395	0.975803	-0.603127	0.110862	1.10336	0.0189154
13965	5	29	13	mMC012076	3010003L21Rik-NM_175404-mMC012076	1.75438	0.0920403	0.750555	-0.557207	-0.214769	0.141565	0.000385873
6142	2	92	30	mMC008684	Acy1-NM_25371-mMC008684	1.75329	0.513411	0.956803	0.151128	-0.112019	-0.0337719	0.00110845
1850	1	58	26	mMC005487	Nfatc4-NM_23699-mMC005487	1.75296	0.569231	-0.884202	0.0943723	0.11585	-1.33003	0.0787799
16792	6	9	24	mMC010015	A930027K05Rik-NM_175556-mMC010015	1.75211	0.227556	-1.23211	0.216337	-0.0825582	-0.374756	0.250368
1672	1	53	8	mMC005186	A930019J01Rik-No acc-mMC005186	1.75	0.451112	0.930552	0.640999	-0.308193	0.270027	0.220201
9488	3	97	16	mMC009243	4930539N22Rik-No acc-mMC009243	1.74969	0.460071	0.392012	0.381082	-0.166297	-0.966138	0.364145
9935	4	11	15	mMC010051	Mkrn1-ps1-No acc-mMC010051	1.74799	-0.537938	1.75794	0.451194	-0.437986	0.644758	0.00249662
10525	4	29	29	mMC012148	5430413I02Rik-NM_19976-mMC012148	1.74743	-0.00756833	1.30655	0.117727	0.176715	0.444062	0.276539
2044	1	64	28	mMC006096	Stard7-NM_139308-mMC006096	1.74695	0.368039	1.12204	0.329995	-0.396693	-0.185406	0.00844208
9296	3	91	16	mMC008675	2310021N16Rik-No acc-mMC008675	1.74669	-0.573213	0.0370112	-0.258591	0.21895	-0.978618	0.0111472
1743	1	55	15	mMC005059	Kif4-NM_8446-mMC005059	1.74656	0.728864	-2.18403	0.855208	0.41307	-0.866671	0.272085
9000	3	82	8	mMC007970	2810468N07Rik-No acc-mMC007970	1.74527	1.44023	0.418645	-0.0269481	-0.214977	-0.688432	0.0116977
19011	6	79	3	mMC016765	6030443O07Rik-XM_484809-mMC016765	1.74456	0.615292	0.366578	0.0941343	-0.288621	-0.562368	0.0054337
8776	3	75	8	mMC007114	3300005D01Rik-XM_196166-mMC007114	1.74426	-0.173683	-0.0744149	0.303751	-0.232517	-0.163232	0.449204
16652	6	5	12	mMC009603	Sdf2l1-NM_22324-mMC009603	1.74411	0.868588	0.775851	-0.134808	0.00977659	-0.55183	0.261737
18901	6	75	21	mMC016406	Ctbp2-NM_9980-mMC016406	1.74385	0.627662	0.162095	0.0841715	-0.0313244	-0.215824	0.0570713
16851	6	11	19	mMC010261	Mill1-NM_153749-mMC010261	1.74267	-0.303997	0.264549	0.0631339	0.267599	-1.14053	0.00542023
5775	2	81	15	mMC007827	4932418K24Rik-NM_172799-mMC007827	1.74141	0.755839	1.33875	-0.247865	-0.304109	-0.0164314	4.33289e-05
5636	2	77	4	mMC007421	1700019B01Rik-XM_133591-mMC007421	1.74126	1.71802	0.815196	0.421366	-0.26905	-0.99806	0.00140155
9806	4	7	14	mMC009620	4933430H15Rik-XM_135711-mMC009620	1.74084	-0.379998	0.995784	0.500056	0.245803	0.498402	0.0953238
2018	1	64	2	mMC006065	4930423B08Rik-No acc-mMC006065	1.74055	0.195023	-0.274351	0.217006	-0.454527	-0.146485	0.598557
18470	6	62	6	mMC015289	Fez2-NM_199448-mMC015289	1.74024	-0.513624	-0.388083	0.0665471	0.0661594	-0.533229	0.0310304
13155	3	4	3	mMC019749	Lrsam1-NM_199302-mMC019749	1.74019	0.807163	0.641597	-1.11979	-0.0484295	0.412044	0.00198933
16745	6	8	9	mMC009762	H2-M11-NM_177635-mMC009762	1.73894	0.139282	1.23069	-0.215432	-0.044505	-0.13997	0.000652279
4295	2	35	7	mMC003442	BC022713-NM_177761-mMC003442	1.73803	0.845414	0.51073	0.0671546	-0.147492	-0.681389	0.224963
638	1	20	30	mMC001868	C030027H14Rik-No acc-mMC001868	1.73716	-0.0229316	0.450091	0.0877567	-0.201029	-0.70924	0.123583
11965	4	74	29	mMC016284	2810433D01Rik-XM_484087-mMC016284	1.73701	0.0989563	0.173285	0.20373	0.209002	0.434845	0.0659369
13850	5	25	26	mMC011623	Xrcc1-NM_9532-mMC011623	1.7361	0.997787	0.444752	-0.370969	-0.0851983	-0.31638	0.0502682
6136	2	92	24	mMC008687	Thrap4-NM_11869-mMC008687	1.73589	1.43141	0.148998	-0.149573	0.00839527	-0.131322	6.80664e-05
498	1	16	18	mMR001486	AK036573-No acc-mMR001486	1.73548	0.920628	-0.0184433	0.440723	0.0404615	0.0906296	0.736247
10898	4	41	18	mMC013278	Ap4s1-NM_21710-mMC013278	1.73531	-0.246548	0.957251	0.572926	0.196992	0.345878	0.09024
13586	5	17	18	mMC010878	BC037006-XM_109956-mMC010878	1.73477	-0.424443	-0.454161	-0.113543	-0.0938581	-1.0178	0.17252
6056	2	90	8	mMC008458	0610040A22Rik-No acc-mMC008458	1.73466	-0.520916	-2.21517	0.133432	-0.187116	-0.419099	0.0120826
2350	1	74	14	mMC007020	C8a-NM_146148-mMC007020	1.73459	0.632974	0.850251	0.0411353	0.143067	0.347241	0.00421782
3557	2	12	5	mMC001025	2600009E05Rik-XM_485067-mMC001025	1.73433	0.29413	0.264897	0.0561147	-0.531897	-0.442161	0.22587
14682	3	51	26	mMC024399	Kcnn2-NM_80465-mMC024399	1.73393	-0.209262	0.801361	0.469902	0.265438	-0.636505	0.00554057
691	1	22	19	mMC002101	A830054O07Rik-No acc-mMC002101	1.73368	-0.394869	1.26928	0.0855707	-0.490965	0.00472284	1.46729e-05
18778	6	71	26	mMC015951	Slc35c1-NM_145832-mMC015951	1.73356	-0.359479	-0.489008	-0.42043	-0.0205905	-0.841585	0.250911
766	1	24	30	mMC002252	Ddx41-NM_134059-mMC002252	1.73347	0.569689	-0.152893	0.168284	-0.208385	-0.473305	0.00213841
5917	2	85	29	mMC008212	A730080H06Rik-XM_489054-mMC008212	1.73291	-0.319548	-0.597525	-0.45452	-0.380818	-0.224862	4.82905e-05
11782	4	69	6	mMC015961	Olfr1301-NM_146887-mMC015961	1.73271	-0.34369	1.03106	0.732055	-0.260039	0.382611	0.00353066
763	1	24	27	mMC002280	Pace4-XM_355911-mMC002280	1.73249	0.43089	0.220331	0.457435	-0.480635	-1.04567	0.135357
10513	4	29	17	mMC012150	3010023C09Rik-No acc-mMC012150	1.73243	0.728865	1.34424	0.360718	-0.0277667	-0.505901	0.00945496
6374	2	100	6	mMC009449	Pcca-NM_144844-mMC009449	1.73236	1.17895	2.19822	-1.06914	0.629658	-0.759205	0.000979199
9764	2	102	4	mMR029221	E130304D01-NM_173403-mMR029221	1.7322	0.758191	0.508104	-0.1565	-0.335881	0.285871	0.0748323
2395	1	75	27	mMC006984	P2ry10-NM_172435-mMC006984	1.73115	0.841783	0.907871	0.561674	-0.124772	-0.0708611	0.09342
14136	5	34	24	mMC012327	D4Bwg0951e-NM_26821-mMC012327	1.72993	0.807809	1.76256	-0.616276	0.195159	0.401557	0.00407681
7597	3	38	13	mMC003820	Sfrs2-NM_11358-mMC003820	1.72949	0.824122	1.5736	0.603788	-0.0953199	-0.402489	3.50283e-05
4879	2	53	15	mMC005139	Lsm2-NM_30597-mMC005139	1.72934	-0.371504	1.23765	-0.0818165	-0.106237	-0.821537	4.28313e-06
3526	2	11	6	mMC001089	Ppp2cz-NM_27982-mMC001089	1.72913	0.381397	1.09557	0.315444	-0.264613	-1.22031	0.0756762
3539	2	11	19	mMC001141	Sntb2-NM_9229-mMC001141	1.72893	0.921393	0.85502	-0.0328316	0.292774	-0.402921	0.119972
5727	2	79	31	mMC007672	A930017N06Rik-NM_175522-mMC007672	1.7288	0.921668	0.690572	-0.311302	-0.270189	-0.405849	0.00514792
15577	5	79	25	mMC016887	C630007C17Rik-XM_485015-mMC016887	1.72844	0.997463	0.678466	-0.159334	0.0386068	0.382252	5.74721e-05
4651	2	46	11	mMC004307	Mtx2-NM_16804-mMC004307	1.72837	-0.465995	0.439216	0.151288	-0.287106	-0.252056	0.0570027
10408	4	26	8	mMC011626	Vtn-NM_11707-mMC011626	1.72771	0.986789	1.26396	-0.547753	0.376596	1.03162	0.0324591
15054	5	63	14	mMC015276	Sema6b-NM_13662-mMC015276	1.72752	0.800228	0.969639	-0.372738	-0.240707	0.253051	0.000194941
15719	3	84	7	mMR027450	Ccpg1-NM_28181-mMR027450	1.72698	-0.225264	0.411589	0.429035	-0.13048	-0.0137977	0.145068
17119	6	19	31	mMC011032	1700066B19Rik-No acc-mMC011032	1.72688	-0.314729	-0.0593252	0.118365	-0.133427	-0.568682	0.037576
9284	3	91	4	mMC008677	Psmb9-NM_13585-mMC008677	1.72638	3.6447	0.6746	-0.264438	0.260737	0.371617	1.22751e-07
14098	5	33	18	mMC012414	E130304I02Rik-No acc-mMC012414	1.72613	-0.205155	0.200423	-0.723525	-0.111162	0.242273	0.00074692
7438	3	33	14	mMC003076	Gbgt1-NM_139197-mMC003076	1.72594	-0.222887	0.936654	-0.319415	-0.456429	-0.268055	0.0014395
2325	1	73	21	mMC007182	4930563J15Rik-No acc-mMC007182	1.72571	0.43863	0.496159	0.875178	0.152686	-0.339659	0.0310805
11992	4	75	24	mMC016175	Ercc5-NM_11729-mMC016175	1.72526	0.456364	0.13795	0.216427	0.0269535	-0.0873895	0.268277
1093	1	35	5	mMC003137	Nr5a1-NM_139051-mMC003137	1.72506	0.675652	0.337619	0.839887	0.251329	-0.656041	0.496388
3810	2	20	2	mMC001745	Mcph1-NM_173189-mMC001745	1.72473	0.36048	1.02653	0.590903	-0.277454	0.217884	0.0101708
19355	6	89	27	mMC017720	B230208N19Rik-No acc-mMC017720	1.72386	-0.444068	-0.753272	-0.00638921	0.124353	-0.741093	0.0526352
13528	3	15	24	mMC020967	Paqr6-NM_198410-mMC020967	1.72319	0.823922	-0.516264	-0.0334135	0.471344	0.752012	0.117894
10121	4	17	9	mMC010994	Mtap-NM_24433-mMC010994	1.72315	-0.0694897	0.367495	0.0386057	-0.150584	0.46847	0.103204
9055	3	83	31	mMC007960	4833420D23Rik-No acc-mMC007960	1.72259	-0.22208	-0.273805	0.201582	-0.234724	-0.866289	0.423222
14088	3	33	8	mMC022658	Cox8a-NM_7750-mMC022658	1.72258	-0.0818201	0.227309	-0.0596896	0.00626266	0.0236562	0.000900127
17601	6	35	1	mMC012561	AV216087-NM_144804-mMC012561	1.72179	0.173846	1.24616	0.255635	-0.573072	0.524134	0.0196257
9739	2	101	11	mMR029355	Pck1-NM_11044-mMR029355	1.72173	0.691695	0.626297	-0.0624528	-0.893199	0.496611	0.0094727
18154	6	52	10	mMC013962	1700015C15Rik-No acc-mMC013962	1.72173	-0.352572	0.745861	0.563196	-0.0909928	-0.790259	0.0574785
11004	4	44	28	mMC013392	Xpo6-NM_28816-mMC013392	1.72148	0.408259	0.890017	-0.179979	-0.0840539	-0.225479	0.0220997
6361	2	99	25	mMC009591	Bpnt1-NM_11794-mMC009591	1.72092	1.13432	0.393787	-0.388076	0.0189066	-0.318401	0.0179695
5811	2	82	19	mMC007765	Clstn1-NM_23051-mMC007765	1.72031	0.617261	0.968859	0.0859439	0.0553481	-0.264793	0.0531295
7146	2	20	10	mMC021354	Glce-NM_33320-mMC021354	1.72008	0.532986	1.01765	-0.341235	-0.426216	0.0976716	0.0184335
4042	2	27	10	mMC002626	Dio3as-XM_358428-mMC002626	1.71993	-0.229865	-0.616117	-0.0831734	-0.652421	1.09636	0.0507866
2165	1	68	21	mMC006526	Kcnh1-NM_10600-mMC006526	1.71977	0.215592	2.47673	0.121781	-0.328616	0.456453	0.000554566
9058	3	84	2	mMC007793	Pafah1b3-NM_8776-mMC007793	1.7188	0.840815	0.791389	-0.314305	0.00665838	-0.124593	0.00506679
16837	6	11	5	mMC010233	Mgat5-NM_145128-mMC010233	1.71878	0.76655	0.804879	-0.260185	-0.0364415	-0.78024	4.17809e-06
3177	1	100	9	mMC009570	Abcd3-NM_8991-mMC009570	1.71857	0.177223	-0.911514	0.428868	-0.21519	0.591827	0.0511387
18870	6	74	22	mMC016422	Dclre1b-NM_133865-mMC016422	1.71813	-0.604594	-0.318269	0.158634	0.170473	-0.661249	0.0218548
13133	3	3	13	mMC019860	2600009P04Rik-No acc-mMC019860	1.71806	-0.183089	-0.820152	-0.222095	-0.302744	-0.288311	0.000553218
18064	6	49	16	mMC013851	Usp3-NM_144937-mMC013851	1.71781	-0.473326	0.300301	-0.207999	0.542852	-1.14743	0.109785
16728	6	7	24	mMC009831	2310005O14Rik-NM_26452-mMC009831	1.71758	-0.10756	0.130339	0.0588258	0.178464	-0.201742	0.211324
5865	2	84	9	mMC007938	4930534B04Rik-NM_181815-mMC007938	1.71735	0.73071	1.15177	-0.514982	0.158848	-0.844069	0.00138596
7361	3	31	1	mMC002961	BC030183-NM_182783-mMC002961	1.71643	-1.29142	-0.0433845	0.34446	-0.0608206	0.0101338	0.0401626
14731	5	53	11	mMC014379	2900089D17Rik-No acc-mMC014379	1.71527	0.375834	0.396124	-0.0476376	-0.0301473	-0.306026	0.126154
2873	1	90	25	mMC008631	Rbp1-NM_11254-mMC008631	1.71486	0.381679	0.615147	0.670605	-0.293819	0.539758	0.528028
1337	1	42	25	mMC004023	Sytl5-NM_177704-mMC004023	1.71385	0.477645	-0.53789	0.0425681	0.233039	-1.8578	0.0528112
547	1	18	3	mMC001693	Trpc4ap-NM_19828-mMC001693	1.71231	1.23492	1.87062	1.28778	0.440704	-0.170441	0.00317217
8276	3	59	20	mMC005581	2610034N15Rik-No acc-mMC005581	1.71094	-0.197349	0.296554	0.184098	-0.0649696	-1.02348	1.03607e-05
14806	5	55	22	mMC014510	Thy1-NM_9382-mMC014510	1.71093	0.709865	1.01394	-0.186724	-0.23158	-0.13841	1.49382e-05
16847	6	11	15	mMC010235	Arl6ip4-NM_144509-mMC010235	1.71087	0.92388	0.37814	-0.194091	0.454863	-1.00732	0.0648525
623	1	20	15	mMC001891	Mrpl38-NM_24177-mMC001891	1.71033	0.688799	0.73387	0.43864	-0.0512017	-0.573817	0.379304
14089	5	33	9	mMC012434	4921534H16Rik-No acc-mMC012434	1.71006	0.0475619	0.786365	-0.153243	-0.00548931	-0.308787	0.00994422
7121	3	23	17	mMC002174	1110028F18Rik-No acc-mMC002174	1.70997	0.951909	-0.296092	0.107093	-0.133532	-0.478394	0.0338928
4646	2	46	6	mMC004257	Lass4-NM_26058-mMC004257	1.70971	1.19399	-0.556933	-0.222684	0.11388	-0.717349	0.538382
13335	5	9	23	mMC010135	Kng1-NM_23125-mMC010135	1.70971	1.66562	2.79167	-0.638395	0.341021	0.100682	6.89361e-07
1466	1	46	26	mMC004335	Mta1-NM_54081-mMC004335	1.70907	0.568786	0.456735	-0.193673	-0.266651	-0.192117	0.00333946
9587	2	96	19	mMR028701	1110032D12Rik-NM_19770-mMR028701	1.70865	-0.444101	-0.0866796	0.401373	-0.262548	-1.42514	0.0586309
16780	6	9	12	mMC009987	AI132487-XM_127129-mMC009987	1.70819	0.39238	0.418589	0.0676661	-0.508644	0.211823	0.266657
7504	2	31	16	mMC022595	Fbxo42-NM_172518-mMC022595	1.70746	-0.190144	-0.386424	-0.415383	-0.280862	-0.5179	0.0260566
18211	6	54	3	mMC014549	Dph2l2-NM_26344-mMC014549	1.70744	-0.267608	-0.653278	-0.157045	-0.0501756	-0.469658	0.0215261
8132	3	55	4	mMC005221	Myo5a-NM_10864-mMC005221	1.70716	-0.6314	-0.730858	0.489986	0.0554234	-0.862123	0.636217
16904	6	13	8	mMC010370	9630020C08Rik-NM_177797-mMC010370	1.70704	-0.0667022	-1.36644	-0.0527707	-0.128923	-0.153084	3.77781e-07
18972	6	77	28	mMC016544	Centg2-NM_178119-mMC016544	1.70689	0.00363019	-0.226541	-0.0241262	0.406696	-1.44313	0.403164
17004	6	16	12	mMC010483	En1-NM_10133-mMC010483	1.70622	-0.072007	-0.0792939	-0.435781	0.284228	-1.17984	0.00762587
12055	4	77	23	mMC016759	Sort1-NM_19972-mMC016759	1.70611	-0.0642369	0.556358	-0.126489	-0.0261831	0.865529	0.0400518
8032	3	51	32	mMC004816	B230333C21Rik-XM_111900-mMC004816	1.70517	-0.547117	-0.632471	0.543873	-0.141851	-1.40135	0.000843438
5855	2	83	31	mMC008056	Pttg1ip-NM_145925-mMC008056	1.7051	1.31563	1.07502	-0.261026	-0.12425	-0.298669	0.00658663
11975	2	171	7	mMO036082	mtDNA-completeGenome_275-mMO036082	1.70386	1.59397	1.52508	-0.629372	0.19122	0.0959164	0.0221176
6188	2	94	12	mMC008843	Rock1-NM_9071-mMC008843	1.70348	-0.273664	0.135266	0.347658	-0.880177	0.0773761	0.046789
2869	1	90	21	mMC008630	Gnat1-NM_8140-mMC008630	1.70329	0.524033	0.510439	-0.180355	-0.0503971	-0.432438	4.63067e-05
4116	2	29	20	mMC002789	C130086A10-NM_173746-mMC002789	1.70328	0.73383	0.761789	-0.632049	-0.00209607	-1.22838	0.0218948
15303	5	71	7	mMC016114	Zfp184-NM_183014-mMC016114	1.70282	-1.43561	0.121861	-0.101284	0.0118741	0.271838	0.010904
15035	5	62	27	mMC015040	Kl-NM_13823-mMC015040	1.70204	0.53783	-0.0128058	0.399303	-0.0762306	-0.646175	0.0617477
1942	1	61	22	mMC005958	Olfr1302-NM_146889-mMC005958	1.7017	0.113754	-1.1238	0.854022	-0.17575	0.0270744	0.332429
7219	2	22	19	mMC021589	Slc38a4-NM_27052-mMC021589	1.70162	0.396623	0.977493	-1.22535	-0.21094	0.0353722	0.00345846
2195	1	69	19	mMC006797	1700039O17Rik-No acc-mMC006797	1.70119	0.212288	1.27361	0.579925	0.357821	-0.0203777	0.0807031
767	1	24	31	mMC002304	Pax2-NM_11037-mMC002304	1.70097	1.08748	0.111188	-0.100484	0.0993245	-0.245765	0.506493
14684	5	51	28	mMC014152	4632407F12Rik-XM_110709-mMC014152	1.70071	0.341001	0.669874	0.149946	-0.147729	-0.217525	0.00415386
13364	5	10	20	mMC009997	1700030J22Rik-XM_134467-mMC009997	1.70062	0.679146	1.1053	-0.228105	0.160715	-0.244015	4.60594e-05
17221	6	23	5	mMC011385	Ywhab-NM_18753-mMC011385	1.70007	0.0391164	-0.33899	-0.0750611	0.319287	-0.504265	0.591522
1553	1	49	17	mMC004854	Habp2-NM_146101-mMC004854	1.70004	-0.436079	0.247498	0.583731	-0.0296472	-1.00576	0.285239
18858	6	74	10	mMC016442	Tdrd1-NM_1002238-mMC016442	1.69971	-0.0557374	-0.773843	1.01723	-0.0659901	-0.685891	0.611064
8782	2	71	14	mMR026412	4930430E16Rik-NM_28672-mMR026412	1.69952	0.910397	0.559805	-0.507059	-0.0127662	0.266299	0.0350907
15341	5	72	13	mMC016028	4732460K03Rik-No acc-mMC016028	1.69854	0.475563	0.351923	-0.385574	0.52713	0.0848093	0.00528903
2647	1	83	23	mMC007751	Hand1-NM_8213-mMC007751	1.69845	0.249648	0.761959	0.396373	-0.1561	0.00727345	0.00989171
2042	1	64	26	mMC006071	Supt4h-NM_9296-mMC006071	1.69762	0.822983	1.53227	-0.0551587	-0.130947	0.125951	0.000127494
14354	5	41	18	mMC013182	Lama2-NM_8481-mMC013182	1.69595	0.33764	0.386372	-0.0607693	0.064261	0.053008	0.0190655
8777	2	71	9	mMR026458	Bcl2a1a-NM_9742-mMR026458	1.69593	0.655672	0.639416	-0.918539	-0.259591	-0.113691	0.0541281
10273	4	22	1	mMC011313	6330512M04Rik-NM_177265-mMC011313	1.6959	0.515849	0.570514	-0.000516902	0.411449	-0.165909	0.0289962
7415	2	28	23	mMC022151	Casq1-NM_9813-mMC022151	1.69577	0.898135	1.30438	-0.832408	0.120501	-1.09764	0.00739145
13339	5	9	27	mMC010136	1190009E20Rik-No acc-mMC010136	1.69539	0.394969	0.00527305	-0.249688	-0.00646664	0.541904	0.000625335
10650	4	33	26	mMC012487	Olfr284-NM_146281-mMC012487	1.69396	0.147445	0.696136	-0.256194	0.00479818	0.120178	0.365312
18433	6	61	1	mMC015049	Ndst1-NM_8306-mMC015049	1.69386	0.727789	0.73272	-0.174068	0.0997898	-0.580234	6.68636e-06
18832	6	73	16	mMC016155	Epb4.1l2-NM_13511-mMC016155	1.69321	0.719772	-0.229707	0.254018	-0.137895	-0.898138	0.00313459
9224	3	89	8	mMC008450	Hrasls3-NM_139269-mMC008450	1.69252	-1.56008	0.489521	0.0314548	-0.471839	0.536107	0.0261846
14207	5	36	31	mMC012576	4933429K18Rik-No acc-mMC012576	1.69231	-0.459998	0.766971	-0.379509	-0.153763	-0.0517351	0.000252473
18049	6	49	1	mMC013897	9030407H20Rik-NM_144805-mMC013897	1.69151	0.823651	0.142116	-0.202087	0.150603	-0.641687	0.0231176
6964	3	18	20	mMC001829	2310026J01Rik-NM_177845-mMC001829	1.69063	-0.350878	0.182147	-0.0961567	-0.200393	-1.50291	0.00370158
5197	2	63	13	mMC006132	AI118078-NM_172923-mMC006132	1.69046	1.37538	1.30778	0.0534874	-0.19273	-0.191876	0.0276905
10848	4	39	32	mMC012696	Bin1-NM_9668-mMC012696	1.69035	0.118064	1.20329	0.0500061	0.150047	0.607155	0.197256
2752	1	86	32	mMC008176	Fut7-NM_13524-mMC008176	1.69016	-0.443179	-0.0494588	0.0586299	-0.115651	-0.894632	0.145034
17560	6	33	24	mMC012319	Ranbp9-NM_19930-mMC012319	1.68996	0.619004	0.562413	0.379655	0.621662	-1.2799	0.157033
18486	6	62	22	mMC015270	Pla2g2d-NM_11109-mMC015270	1.68829	-0.552522	-0.666328	0.0998921	-0.340215	-0.982702	0.314085
17615	6	35	15	mMC012539	4930542N06Rik-No acc-mMC012539	1.68763	-0.193803	-0.158556	-0.119632	-0.0244401	-0.500433	0.0185722
17654	6	36	22	mMC012406	1300017J02Rik-NM_27918-mMC012406	1.68651	0.527217	0.936098	0.100357	-0.28573	0.73978	0.334222
10814	4	38	30	mMC012804	Vangl1-NM_177545-mMC012804	1.68639	0.407809	0.696184	0.16293	-0.688391	0.967668	0.0739058
7282	2	24	18	mMC021742	Ubxd1-NM_24432-mMC021742	1.68623	-0.258798	0.356184	-0.351309	-0.217427	-0.570044	0.021281
9837	4	8	13	mMC009980	2010004O20Rik-NM_22418-mMC009980	1.68572	0.418806	1.41728	-0.245146	-0.366389	0.323117	5.0714e-05
1713	1	54	17	mMC005150	Ring1-NM_9066-mMC005150	1.68496	0.263589	-0.650842	0.0781104	-0.472494	-0.428171	0.0393342
1758	1	55	30	mMC005036	P2rx1-NM_8771-mMC005036	1.6848	0.888494	1.20973	-0.10805	-0.292637	0.954574	0.000325186
6973	2	14	29	mMC020796	Foxl1-NM_8024-mMC020796	1.68469	1.15799	0.602466	-0.567151	-0.431939	0.826862	0.00253707
3805	2	19	29	mMC001884	Tas2r116-No acc-mMC001884	1.6841	0.23534	-3.50218	0.26444	-0.299138	-0.746933	0.0260706
4061	2	27	29	mMC002652	2810406C15Rik-NM_146171-mMC002652	1.68397	-0.351415	-1.49782	0.381058	-0.247793	-0.703006	0.732265
1279	1	40	31	mMC003840	2900078C09Rik-No acc-mMC003840	1.68369	0.857209	0.890868	0.0957965	-0.426523	-1.34534	0.0466286
4078	2	28	14	mMC002516	Pdip-XM_128552-mMC002516	1.6831	0.555654	0.232376	0.149217	-0.00998629	-1.29058	0.283109
828	1	26	28	mMC002440	D030060M11Rik-NM_146000-mMC002440	1.68235	-0.295156	1.4648	0.165004	-0.210552	-0.561123	0.00656228
6608	2	3	16	mMC019907	Gja5-NM_8121-mMC019907	1.68231	0.152268	0.475585	-0.47702	-0.331454	-0.130867	0.0778997
15527	5	78	7	mMC016594	1110014K05Rik-NM_28622-mMC016594	1.68124	-0.0442442	1.25846	0.415259	-0.135407	0.126526	0.000767994
4643	2	46	3	mMC004285	A430068E04Rik-No acc-mMC004285	1.68099	-0.0401036	-3.84921	0.569579	-0.222007	0.173648	3.78876e-07
19821	6	104	13	mMC019004	C230082I21Rik-No acc-mMC019004	1.68057	-0.136034	-0.434029	0.727517	0.119928	-0.268567	0.508002
14887	5	58	7	mMC014674	2810410A03Rik-No acc-mMC014674	1.67973	1.11585	0.583306	-0.378051	0.36429	-0.616477	0.00154635
4016	2	26	16	mMC002339	Phgdhl1-No acc-mMC002339	1.67918	1.54772	0.473381	0.255697	-0.115742	-0.556575	0.00373527
8004	3	51	4	mMC004837	Muc3-XM_355711-mMC004837	1.67825	0.528089	1.05388	-0.170542	-0.0570263	-0.76355	0.000571634
13209	5	5	25	mMC009775	C630002B14Rik-NM_175331-mMC009775	1.67787	0.0344169	0.671929	-0.156271	-0.257753	-0.0630963	0.00606865
7831	2	41	23	mMC023575	Pkig-NM_11106-mMC023575	1.67786	-0.166465	1.35507	-0.852338	-0.238232	-0.195903	0.000864789
15012	5	62	4	mMC015013	Rgl3-NM_23622-mMC015013	1.67729	0.753003	1.51541	-0.213869	-0.306619	0.657458	0.00174511
13867	5	26	11	mMC011603	Chrm3-NM_33269-mMC011603	1.67694	0.398463	-1.26903	-0.114303	-0.0431777	-1.05646	0.0102237
9167	3	87	15	mMC008315	Fbxl8-NM_15821-mMC008315	1.67648	0.947615	1.4321	-0.138282	0.23822	0.317438	0.00106249
15779	5	86	3	mMC017341	1700094C09Rik-NM_24279-mMC017341	1.67416	-0.258196	0.552703	0.165207	-0.281702	-0.00284242	0.000353855
13289	3	8	9	mMC020130	AI225934-No acc-mMC020130	1.67401	0.299476	0.0314696	-0.573996	-0.0598519	-0.11765	0.000293788
9421	2	91	13	mMR028404	Nrxn3-NM_172544-mMR028404	1.67243	0.333352	-0.194556	0.551968	-0.387327	0.377695	0.0177025
5726	2	79	30	mMC007620	Adcy2-NM_153534-mMC007620	1.67226	0.680101	-0.845572	-0.203503	-0.354688	-0.603979	0.100286
10281	2	118	9	mMR030778	Psmd8-NM_26545-mMR030778	1.67201	0.725755	0.641211	-0.88873	-0.0786646	-0.213613	0.00928361
14557	5	47	29	mMC013788	Slc1a4-NM_18861-mMC013788	1.67175	-0.42454	-0.395308	0.018791	0.0765439	0.0828954	0.0109204
9400	3	94	24	mMC009151	Creld1-NM_133930-mMC009151	1.67034	0.317032	0.50204	-0.316614	0.227207	-0.423614	0.00899451
8178	2	52	18	mMC024430	Dsg1b-NM_181682-mMC024430	1.66989	0.742206	1.05032	-0.444014	-0.214795	-0.29157	0.000192027
1584	1	50	16	mMC004739	D330022H12Rik-No acc-mMC004739	1.6698	-0.0906206	-0.51873	0.619629	-0.0411861	0.175004	0.0654047
18055	6	49	7	mMC013898	D4Bwg1540e-NM_26257-mMC013898	1.66968	0.327603	0.54276	-0.453613	-0.0919649	-0.0780821	0.00016653
7317	2	25	21	mMC022062	Itm2b-NM_8410-mMC022062	1.66907	0.266918	0.488318	-0.637155	-0.353367	0.200549	0.00988352
10398	2	121	30	mMR031228	Es1-NM_7954-mMR031228	1.66902	0.696914	1.48702	-0.585593	-0.55268	0.438533	0.10836
9899	2	106	11	mMR029651	F730002C09Rik-No acc-mMR029651	1.6674	0.583746	0.374066	0.565974	-0.25494	-0.267077	0.00723802
10536	4	30	8	mMC012010	Icam1-NM_10493-mMC012010	1.66721	-0.290497	0.802899	0.705608	-0.136021	-0.803598	0.00101155
16776	6	9	8	mMC009986	Tcrb-V8.3-No acc-mMC009986	1.66642	0.716454	0.0791098	0.0939257	-0.130514	-0.583395	0.0118072
17748	6	39	20	mMC012877	5330428N10Rik-No acc-mMC012877	1.66622	0.468286	0.387831	0.229016	-0.000565144	-0.958125	0.126591
2654	1	83	30	mMC007724	Prm3-NM_13638-mMC007724	1.66571	1.08925	0.831314	-0.171549	0.207369	-0.0730304	0.109804
723	1	23	19	mMC002013	4921525D07Rik-No acc-mMC002013	1.6656	1.36634	0.543397	0.301295	0.437014	-0.888041	0.217035
15155	5	66	19	mMC015445	4930557B06Rik-No acc-mMC015445	1.66551	0.294968	-0.693178	-0.184515	0.124994	0.191839	0.00738258
11838	4	70	30	mMC015876	5430427N15Rik-No acc-mMC015876	1.66519	-0.494969	0.285259	0.109926	-0.130026	0.132039	0.000334878
9585	3	100	17	mMC009382	Nudt8-NM_25529-mMC009382	1.66506	1.2829	-0.0174744	-0.0232148	-0.0571241	-0.340143	0.146449
17092	6	19	4	mMC010981	Fancl-NM_25923-mMC010981	1.66398	-0.528515	-0.0926598	0.161764	0.0371492	-0.160565	0.05354
14163	5	35	19	mMC012661	Abcf1-NM_13854-mMC012661	1.6629	0.790768	1.11442	-0.391453	-0.459414	1.16726	0.110309
13344	5	9	32	mMC010088	E230012P03-No acc-mMC010088	1.66149	-0.232796	-0.167273	-0.226827	-0.402998	-0.109261	0.00059966
4959	2	55	31	mMC005368	Cic-NM_27882-mMC005368	1.66126	1.18268	-0.172786	-0.176308	-0.272794	0.0563595	0.118107
18534	6	64	6	mMC015113	2210404O07Rik-XM_125703-mMC015113	1.66089	1.33967	0.261225	-0.466942	0.0172544	-0.586471	0.0276904
7445	2	29	21	mMC022446	Islr-NM_12043-mMC022446	1.65968	0.302713	1.55682	-0.658753	-0.117554	-0.764708	0.000117502
13945	5	28	25	mMC011807	Upf3a-XM_356061-mMC011807	1.6595	1.06348	0.582369	-0.481687	0.645917	-0.873283	0.005864
14338	3	41	2	mMC023425	Serpina1b-NM_9244-mMC023425	1.65929	2.04632	2.81001	-1.01696	0.937016	0.0404444	0.00109665
8815	3	76	15	mMC007075	Gm111-NM_207234-mMC007075	1.65894	0.677504	0.495694	-0.275131	0.100074	0.0657895	0.244168
10872	4	40	24	mMC013007	Tcea2-NM_9326-mMC013007	1.65845	0.520428	1.08634	0.0826614	-0.064996	0.254462	0.00484816
7372	3	31	12	mMC002891	Ltbr-NM_10736-mMC002891	1.65738	-0.581715	-0.757867	-0.158607	0.161759	-1.19357	0.000288075
6607	2	3	15	mMC019931	Rpl9-NM_11292-mMC019931	1.65655	1.06733	1.18687	-0.17375	-0.0998343	0.46767	0.00126369
9736	4	5	8	mMC009794	Gpd1-NM_10271-mMC009794	1.65602	-0.232831	0.223088	0.208155	0.096346	1.14191	0.0853056
9524	3	98	20	mMC009509	Dag1-NM_10017-mMC009509	1.65584	0.610875	1.03881	-0.398635	-0.0525567	-0.480073	0.00346359
12559	4	93	15	mMC018291	Olfr559-NM_147112-mMC018291	1.65526	-0.222623	1.1365	0.255871	-0.139205	0.0978912	0.0166929
6137	2	92	25	mMC008735	Olfr733-NM_146663-mMC008735	1.65457	0.369544	-0.69357	-0.097036	-0.0162172	-0.700246	0.772255
18565	6	65	5	mMC015409	Tnfsf9-NM_9404-mMC015409	1.6535	0.776426	-0.492379	-0.0111857	0.333359	0.244313	0.933578
8936	3	80	8	mMC007410	D630002J15Rik-XM_485742-mMC007410	1.65257	0.755768	0.46405	-0.175935	-0.0712516	-0.148596	0.00186488
14501	5	46	5	mMC013497	LOC238771-XM_484303-mMC013497	1.65249	0.83423	-0.443811	-0.244671	0.150735	-0.262459	0.26304
9007	3	82	15	mMC008019	Dia1-NM_29787-mMC008019	1.65245	0.163647	1.13794	-0.180495	0.126191	-0.12798	8.30849e-05
14930	5	59	18	mMC014918	1700008A23Rik-No acc-mMC014918	1.65196	0.768606	0.465165	-0.0105768	-0.184988	-0.430211	0.0237103
3549	1	111	29	mMR030020	Pcdhgb7-NM_33579-mMR030020	1.6514	0.0996319	-0.0889071	0.307481	-0.288202	-0.0982537	0.00749947
15399	5	74	7	mMC016210	Slc24a1-NM_144813-mMC016210	1.65092	-0.34586	0.255969	0.395672	-0.056952	-0.454821	0.106584
9840	4	8	16	mMC009931	Tnxb-NM_31176-mMC009931	1.6507	1.20818	1.13536	-0.840126	0.746755	-0.662734	0.00100745
12096	4	78	32	mMC016624	A030003A19Rik-NM_173024-mMC016624	1.65068	0.926696	1.03146	0.207061	-0.174194	1.4339	0.110163
17243	6	23	27	mMC011392	C230040D10Rik-XM_356059-mMC011392	1.64979	-0.503371	-0.799629	-0.414551	-0.196518	-1.0612	0.0083946
14465	3	45	1	mMC023881	Unc5cl-NM_152823-mMC023881	1.64925	0.28233	0.855842	-0.950375	0.369673	-1.14838	0.00639086
13259	5	7	11	mMC009971	P4hb-NM_11032-mMC009971	1.64909	0.458446	1.50768	-0.254962	-0.0391465	0.899774	9.19597e-05
17731	6	39	3	mMC012925	AU016977-NM_175016-mMC012925	1.64873	0.0295612	-0.106351	-0.231981	0.153695	-0.655343	0.0286726
7941	3	49	5	mMC004657	4930461G14Rik-No acc-mMC004657	1.64842	0.447769	0.499169	-0.178069	0.0313492	-0.298713	0.107092
4789	2	50	21	mMC004694	Slc17a6-NM_80853-mMC004694	1.64822	0.870333	-4.05099	0.727914	-0.115483	-0.320696	0.149272
10307	4	23	3	mMC011205	Cep2-XM_358344-mMC011205	1.64808	0.928996	1.3644	0.379511	-0.345917	0.371153	0.0011058
13959	5	29	7	mMC012074	Cyp1b1-NM_9994-mMC012074	1.64697	0.532116	0.92963	-0.240397	0.158601	-0.016113	0.0784974
17836	6	42	12	mMC013347	2310004I24Rik-NM_25510-mMC013347	1.64576	0.622123	-0.303542	0.174158	0.0935534	-0.76796	0.229885
14013	5	30	29	mMC011964	Atp6v1c1-NM_25494-mMC011964	1.64409	-0.396731	-0.330744	0.128248	-0.0857936	-0.502286	0.000112943
8914	3	79	18	mMC007526	Cpsf1-NM_53193-mMC007526	1.64374	-1.00175	-0.576759	-0.175984	0.0482501	-1.07005	0.000901783
13616	5	18	16	mMC010787	A230028O05Rik-XM_488773-mMC010787	1.64349	-0.771016	0.256679	-0.0351061	-0.136669	0.0380961	0.00155785
15272	5	70	8	mMC015754	Opn4-NM_13887-mMC015754	1.6432	0.227246	1.00993	0.26015	-0.12392	0.112328	0.00342679
5812	2	82	20	mMC007693	Cyp1a2-NM_9993-mMC007693	1.64303	0.858706	0.817327	-0.455113	-0.0729429	-0.602855	1.70982e-07
3508	2	10	20	mMC000781	Gaa-NM_8064-mMC000781	1.64299	0.582446	-0.543124	0.0380086	-0.0473522	-0.607336	0.080072
13584	5	17	16	mMC010875	B230378P21Rik-No acc-mMC010875	1.64289	0.365588	1.53576	-0.265807	-0.523266	0.21629	0.0630531
18343	6	58	7	mMC014954	1700125C05Rik-No acc-mMC014954	1.64252	-0.505603	-0.493389	0.0494785	-0.0587982	-0.71394	0.000309977
14840	3	56	24	mMC024719	Snx26-NM_178252-mMC024719	1.64252	0.84588	0.77142	0.458088	-0.148873	-0.153229	0.00452884
17417	6	29	9	mMC011954	D5Wsu46e-NM_144913-mMC011954	1.64143	0.523412	1.27746	-0.322347	-0.26431	0.067991	2.68683e-05
16511	5	108	31	mMC019488	C4-NM_9780-mMC019488	1.64001	-0.0435583	0.198826	0.241548	-0.037817	0.0346217	0.111664
534	1	17	22	mMC001734	4933416A02Rik-No acc-mMC001734	1.63932	0.268044	0.689118	0.262302	0.122795	0.200789	0.0468798
17573	6	34	5	mMC012625	5330423I11Rik-No acc-mMC012625	1.63925	-0.460805	0.572527	-0.16667	-0.328028	-0.369772	0.136911
17793	6	41	1	mMC013129	Tigd5-NM_178646-mMC013129	1.63922	-0.350443	0.550387	-0.131798	-0.11329	-0.178637	0.00119561
3952	2	24	16	mMC002155	A530065E19Rik-NM_145433-mMC002155	1.63919	-0.126776	0.0113916	0.648544	-0.330407	0.396829	0.0825926
13970	5	29	18	mMC012030	4930572K03Rik-No acc-mMC012030	1.63883	0.857087	1.91315	-0.833301	0.440907	-0.260651	1.08633e-05
4652	2	46	12	mMC004235	Pou2f3-NM_11139-mMC004235	1.63771	0.184143	1.26661	0.14039	0.044802	0.156679	0.043034
2802	1	88	18	mMC008398	Catsper4-NM_177866-mMC008398	1.6373	-0.000684857	0.476789	0.147812	-0.0841458	-0.967723	0.00381699
5003	2	57	11	mMC005547	2210404E10Rik-No acc-mMC005547	1.63664	-0.313307	0.207417	0.170148	-0.241718	-0.779638	0.0206978
15557	5	79	5	mMC016857	Mcm4-NM_8565-mMC016857	1.6366	-0.330824	0.336424	0.389169	0.188632	-0.193233	0.0022149
9786	4	6	26	mMC009711	Psmc5-NM_8950-mMC009711	1.6363	0.437196	0.418234	0.339582	-0.34783	-0.240431	0.5878
13915	5	27	27	mMC011872	Aoc2-NM_178932-mMC011872	1.63596	0.861598	1.06818	-0.985701	-0.571095	0.518073	0.00030069
17132	6	20	12	mMC010867	Exosc4-NM_175399-mMC010867	1.63584	0.891773	1.24893	-0.446546	0.355885	-0.547953	0.00377634
17088	6	18	32	mMC011048	1700063H04Rik-XM_132752-mMC011048	1.63551	-1.39766	-0.154613	-0.469968	0.369065	-0.53787	0.0236797
13844	3	25	20	mMC021893	Cfhl1-NM_15780-mMC021893	1.63439	1.09978	0.243801	-0.146252	-0.607164	0.574434	0.0211765
13413	5	12	5	mMC010241	Olfr970-NM_146611-mMC010241	1.63433	0.281079	-0.0296464	0.104939	-0.0270623	-0.488725	0.0144358
13813	5	24	21	mMC011422	A030011M19-NM_177723-mMC011422	1.63406	0.558882	1.7488	-0.764902	0.0692142	0.262041	6.42684e-07
17636	6	36	4	mMC012429	Pthlh-NM_8970-mMC012429	1.63397	0.0957121	1.60976	-0.318387	0.00627237	-0.442366	0.000865266
14707	5	52	19	mMC014109	Dhrs10-NM_25330-mMC014109	1.63395	0.806905	0.668083	0.0552758	0.153098	-0.269772	0.00657122
10083	2	112	3	mMR030213	1110017C15Rik-NM_25391-mMR030213	1.63299	-0.417782	-0.454345	0.381611	-0.913195	0.545281	9.23261e-05
4138	2	30	10	mMC002722	6330583M11Rik-NM_24465-mMC002722	1.63279	0.939857	-0.965764	-0.11973	0.410546	-0.182461	0.38099
6010	2	88	26	mMC008279	Irs1-NM_10570-mMC008279	1.63259	0.0793308	1.40851	-0.312006	0.106627	-0.18566	6.01526e-05
14185	3	36	9	mMC022818	Mapre2-NM_153058-mMC022818	1.63249	0.527411	-0.726823	-0.293912	-0.319778	0.554554	0.00553903
15138	5	66	2	mMC015369	Slc5a1-NM_19810-mMC015369	1.63198	-0.191078	0.000689866	-0.134185	-0.0390013	0.178497	0.146813
9888	2	105	32	mMR029672	Serpina1-No acc-mMR029672	1.63188	1.872	1.62578	-0.696408	0.33853	1.06244	0.00141145
15171	5	67	3	mMC015709	Commd10-NM_178377-mMC015709	1.63183	0.896757	-0.0537803	0.443074	0.132162	-0.0533964	0.3351
10919	4	42	7	mMC013234	Arid3a-NM_7880-mMC013234	1.63182	-0.511966	1.34579	0.705568	-0.445192	0.217868	0.002629
5920	2	85	32	mMC008168	1500005P14Rik-XM_133283-mMC008168	1.63177	-0.0214254	0.0181957	-0.20737	-0.338991	-0.143938	0.922792
15090	5	64	18	mMC015214	1700120K04Rik-NM_26628-mMC015214	1.6313	0.365399	0.440868	0.203281	0.0690162	-0.168211	0.0452308
16943	6	14	15	mMC010707	D19Wsu12e-XM_358328-mMC010707	1.63007	-0.061564	-0.674989	0.057861	-0.0202232	-0.317524	0.216402
15342	3	72	14	mMR026228	6530401C20Rik-NM_173405-mMR026228	1.62951	1.02437	0.995655	-0.733252	0.550012	-0.888848	0.0181735
13533	5	15	29	mMC010716	1700022N24Rik-NM_145355-mMC010716	1.62937	0.56443	0.342844	-0.679482	0.222375	-0.431841	4.89399e-06
11743	4	67	31	mMC015456	Tceb3bp1-NM_25852-mMC015456	1.62909	-0.0500525	0.432759	-0.140474	0.0912679	-0.510617	7.94491e-05
7327	3	29	31	mMC002768	Hcn2-NM_8226-mMC002768	1.62904	0.520434	0.50732	0.348492	-0.15341	-0.505163	0.421526
16430	3	106	14	mMR029860	Phxr5-NM_8836-mMR029860	1.62889	-0.269274	2.41185	0.40782	-0.14077	0.81555	0.0026993
18345	6	58	9	mMC014930	Pdir-NM_28295-mMC014930	1.62885	0.691418	0.690789	-0.00102114	0.257609	-0.200291	0.0308546
1939	1	61	19	mMC006029	Gfi1-NM_10278-mMC006029	1.62884	-0.0615596	0.70187	0.132932	-0.122769	-0.884579	0.000513951
1762	1	56	2	mMC005297	Surf5-NM_11513-mMC005297	1.6283	0.334958	0.462532	0.254139	-0.323067	0.315173	0.115547
2315	1	73	11	mMR026763	Targ1-No acc-mMR026763	1.62761	0.143936	0.983648	-0.133937	-0.673835	0.87234	0.0808747
13719	5	21	23	mMC011287	Cideb-NM_9894-mMC011287	1.6276	0.647431	1.53293	-0.619785	0.0561275	0.084805	0.000110437
19059	6	80	19	mMC016701	Bnip1-NM_172149-mMC016701	1.62751	-0.137752	0.165848	-0.574227	0.353999	-1.20649	8.14558e-05
136	1	5	8	mMC020162	Cog8-NM_139229-mMC020162	1.62735	0.517626	1.27145	-0.82328	0.301035	0.896951	0.086286
17464	6	30	24	mMC012223	Sds-NM_145565-mMC012223	1.62606	0.345177	1.1171	-0.441474	0.30935	-1.48258	1.73736e-05
2412	1	76	12	mMC007219	BC046386-NM_181422-mMC007219	1.62585	0.310043	-0.991418	0.645335	-0.160413	-0.394313	0.0363299
14047	5	31	31	mMC012280	4930572J05Rik-NM_198607-mMC012280	1.62534	0.363278	0.0149719	-0.149881	0.0642237	-0.0932279	0.00468338
15499	5	77	11	mMC016683	A330023F24Rik-NM_177154-mMC016683	1.62483	0.195953	0.519123	-0.110753	0.0783212	-0.446799	0.000177611
8726	3	73	22	mMC006918	Flg-No acc-mMC006918	1.6246	-0.278109	-0.108292	0.32571	0.0558289	-0.552742	0.187768
11204	4	51	4	mMC013869	Gpr158-NM_1004761-mMC013869	1.62422	-0.309531	1.57617	0.439508	0.150089	-0.173841	1.37878e-07
797	1	25	29	mMC002548	Prkacb-NM_11100-mMC002548	1.62373	0.191812	-0.537199	0.40307	-0.512347	-0.0546301	0.573701
14076	5	32	28	mMC012144	6330548G22Rik-NM_29532-mMC012144	1.6235	0.221252	0.836147	-0.484171	0.0244878	-0.903513	0.00412889
17693	6	37	29	mMC012724	Fosl2-NM_8037-mMC012724	1.62316	-0.309841	-1.24381	0.1237	0.0935679	-0.682896	0.0681061
1883	1	59	27	mMC025032	BC049697-NM_198673-mMC025032	1.62272	0.851463	0.425895	-0.969554	-0.143051	0.182496	0.00431056
18865	6	74	17	mMC016470	Pcdh21-NM_130878-mMC016470	1.62262	-0.458829	-0.834428	0.552445	1.02724	-0.3869	0.311453
11769	4	68	25	mMC015743	1810008A18Rik-NM_133998-mMC015743	1.62233	-0.431532	1.52194	0.430085	0.120442	0.243258	0.00019037
14826	5	56	10	mMC014442	Wdr5b-NM_27113-mMC014442	1.62205	-0.116909	0.621848	-0.558469	0.109306	-0.0201585	0.0852193
16741	6	8	5	mMC009761	E130111B04Rik-No acc-mMC009761	1.62198	-0.07639	-1.68119	-0.0199461	-0.367946	0.864501	0.068678
11796	4	69	20	mMC015941	9430068D22Rik-No acc-mMC015941	1.62195	-0.326285	0.0342565	0.192812	0.429977	0.819815	0.0296902
5038	2	58	14	mMC005388	Sf3a1-NM_26175-mMC005388	1.62191	1.1832	-0.790492	0.314857	-0.179038	-0.274903	0.00255477
8932	3	80	4	mMC007437	A430110N23-NM_173008-mMC007437	1.62131	1.39324	1.08693	0.411157	0.183737	0.61837	0.150642
14368	5	41	32	mMC013160	Dapk1-NM_29653-mMC013160	1.62097	-0.648343	0.142359	-0.0226334	-0.27703	-0.412424	0.0916822
9113	3	85	25	mMC008143	Tysnd1-XM_125636-mMC008143	1.62065	0.766992	0.53426	-0.17633	0.182718	-0.47276	0.06613
14870	5	57	22	mMC014694	Rgn-NM_9060-mMC014694	1.62052	1.33291	0.701212	-0.152216	-0.372489	0.827516	9.70786e-05
13515	5	15	11	mMC010739	4930429O20Rik-NM_29025-mMC010739	1.62044	0.225256	1.30981	-0.56172	-0.225512	-0.0890176	0.000955835
16836	6	11	4	mMC010213	BC037703-NM_172295-mMC010213	1.6196	0.77524	0.925966	0.0989166	-0.200188	0.0939125	0.213003
1894	1	60	6	mMC005705	D830029L11-No acc-mMC005705	1.61901	0.523166	-1.01279	1.46365	-0.389139	0.0748268	0.091914
8751	3	74	15	mMC007251	5730593N15Rik-NM_175263-mMC007251	1.61896	0.0857668	0.357191	0.0309226	0.177793	-0.494365	0.525516
2872	1	90	24	mMC008583	Serpina4-ps1-No acc-mMC008583	1.61842	0.69831	-1.20462	-0.11516	-0.282682	-1.27568	0.0344765
14791	5	55	7	mMC014578	Pgls-NM_25396-mMC014578	1.61838	0.767273	0.838325	0.0669946	0.245339	-0.427484	0.000716669
8014	3	51	14	mMC004812	Ndg2-NM_175329-mMC004812	1.61783	-1.26324	0.924776	-0.1005	-0.552053	1.14119	0.342312
13524	5	15	20	mMC010669	Bcl11b-NM_21399-mMC010669	1.61781	0.607044	-0.908326	-0.12412	0.135169	-0.743264	0.0758593
850	1	27	18	mMC002350	9130401L11Rik-No acc-mMC002350	1.61735	-0.216001	1.90753	0.218759	-0.25881	0.00459595	0.445943
13856	5	25	32	mMC011624	4930415J21Rik-NM_177767-mMC011624	1.6171	0.631094	0.182778	-0.183928	0.293315	-0.358195	0.0756568
9789	4	6	29	mMC009756	Csrp1-NM_7791-mMC009756	1.6168	0.603083	1.54795	0.239025	-0.202162	0.0100702	0.0147668
11654	4	65	6	mMC015577	Rnps1-NM_9070-mMC015577	1.61653	-0.0372743	1.44314	0.375499	0.0990224	0.398353	0.00377991
8682	3	72	10	mMC006666	Sumf2-XM_355742-mMC006666	1.61637	-0.172251	0.317295	-0.186025	0.0784302	0.13456	0.466674
4144	2	30	16	mMC002723	Tslpr-NM_16715-mMC002723	1.61589	-0.0144928	1.06153	-0.178283	0.0759716	-0.609459	0.00265727
14335	5	40	31	mMC012960	1700125H20Rik-XM_126139-mMC012960	1.61582	-0.375803	0.0758644	0.00342935	-0.330149	-0.352732	0.0392016
5116	2	60	28	mMC005616	Hsd3b5-NM_8295-mMC005616	1.61558	0.616386	-0.168366	-0.227113	-0.181094	-0.27233	0.00567745
4780	2	50	12	mMC004619	Dhrs1-NM_26819-mMC004619	1.61539	0.129085	0.349867	0.192679	-0.203005	0.311958	0.04909
17770	6	40	10	mMC012810	9230117E06Rik-No acc-mMC012810	1.61457	1.13746	0.989083	-0.0930031	0.0764195	-0.0371921	0.00231914
12055	2	173	23	mMO036247	IGKV12-46-AJ235956-mMO036247	1.61434	0.456466	0.907191	-0.582123	-0.171934	-0.734638	0.0181035
14369	5	42	1	mMC013137	E030024N20Rik-No acc-mMC013137	1.61399	0.0635146	-0.517074	0.500586	-0.264137	-0.562976	0.0235944
14442	5	44	10	mMC013290	Vax2-NM_11912-mMC013290	1.61393	1.86738	0.783887	-0.216162	0.226331	-0.162011	0.000125035
17083	6	18	27	mMC011096	Accn2-NM_9597-mMC011096	1.61268	-0.48217	-0.380039	-0.214388	-0.261657	-0.473838	0.34793
11627	4	64	11	mMC015355	A130022D17Rik-No acc-mMC015355	1.61169	-0.565202	1.74144	0.472041	0.428258	0.460298	0.116461
18290	6	56	18	mMC014350	4921517J23Rik-XM_133714-mMC014350	1.61075	0.41118	0.0718447	0.505274	0.362995	-1.36248	0.134659
1278	1	40	30	mMC003788	Prrx2-NM_9116-mMC003788	1.6095	0.355117	-0.344932	0.400457	-0.516609	-0.939231	0.00305581
2068	1	65	20	mMC006341	B930071L05-XM_488696-mMC006341	1.60846	0.618591	1.11788	0.12168	-0.331702	-0.476214	0.258655
18157	6	52	13	mMC014012	5730435O14Rik-No acc-mMC014012	1.60829	0.335754	0.325689	0.0878064	-0.210051	-0.511522	0.232343
4331	2	36	11	mMC003355	Mapk8ip3-NM_13931-mMC003355	1.60796	0.88235	-0.456656	0.0369359	0.262879	-0.933643	0.000380551
4168	2	31	8	mMC002986	A930015G24Rik-No acc-mMC002986	1.60761	0.399791	0.686322	0.199096	-0.179952	-0.496888	0.288313
3845	2	21	5	mMC002065	5730438N18Rik-NM_27460-mMC002065	1.6068	0.235043	1.5608	-0.0133035	0.0764342	0.409959	0.00185735
5403	2	69	27	mMC006680	Foxh1-NM_7989-mMC006680	1.60668	0.654247	0.972681	-0.34885	-0.270447	-0.324022	0.018856
10097	4	16	17	mMC010726	Nola3-NM_25403-mMC010726	1.60625	-0.186244	1.5029	0.597148	0.0638495	-0.0873588	0.00996691
17529	6	32	25	mMC012095	AA536749-NM_12027-mMC012095	1.60613	-0.476923	0.079569	-0.086363	0.0871274	-1.21175	0.0755607
17831	6	42	7	mMC013418	Fem1c-NM_173423-mMC013418	1.60612	1.02699	0.976852	-0.193556	-0.0144726	-0.277808	0.21279
9882	4	9	26	mMC010183	P4ha2-NM_11031-mMC010183	1.60599	0.117415	0.805218	-0.100783	0.0558955	-0.276052	0.602273
3181	1	100	13	mMC009596	Prkaa1-XM_139298-mMC009596	1.60581	0.651096	1.39162	-0.150969	-0.0962204	0.142413	0.00294672
15796	5	86	20	mMC017293	2810430P21Rik-No acc-mMC017293	1.60555	0.0183197	-0.268698	0.314898	-0.0352873	-0.110242	0.00184995
18530	6	64	2	mMC015089	6330417K15Rik-No acc-mMC015089	1.60543	0.695467	0.791069	0.118321	0.124321	-0.665489	0.0365067
15414	5	74	22	mMC016142	Duox1-XM_130483-mMC016142	1.60315	-0.0796719	-1.68176	0.0335064	-0.544906	0.0460125	0.00413268
6057	2	90	9	mMC008506	Igsf6-NM_30691-mMC008506	1.60295	0.56744	1.21295	-0.564382	0.303521	0.0343696	0.0833381
4737	2	49	1	mMC004777	Trim29-NM_23655-mMC004777	1.60279	-0.00734296	0.180588	0.163843	-0.31734	0.0729827	0.0540591
13290	3	8	10	mMC020106	Hist1h2ai-NM_178182-mMC020106	1.60153	1.21757	0.20333	-1.36731	0.158424	-0.196757	0.0152673
792	1	25	24	mMC022111	Rufy2-NM_27425-mMC022111	1.6012	0.622801	0.336148	-0.731891	-0.257294	1.79366	0.155534
7469	2	30	13	mMC022356	2600001B17Rik-NM_172947-mMC022356	1.60002	0.125377	1.58321	-1.0943	-0.156068	-0.972479	0.0109247
13631	5	18	31	mMC010840	Olfr568-NM_147091-mMC010840	1.59965	0.938605	0.967685	-0.630262	0.129572	-0.223685	3.27244e-05
13663	5	19	31	mMC011128	Mep1b-NM_8586-mMC011128	1.59899	0.515551	1.28561	-0.795182	-0.105173	-0.304309	0.000476948
14062	5	32	14	mMC012116	2810026P18Rik-No acc-mMC012116	1.59855	0.107734	0.982464	-0.2541	-0.0440509	-0.0584441	0.0247096
5677	2	78	13	mMC007380	Them2-NM_25790-mMC007380	1.5985	1.00477	-0.885315	-0.446017	-0.00680635	-0.152548	0.00108288
12027	4	76	27	mMC016488	Hoxa5-NM_10453-mMC016488	1.59746	0.236218	-0.411904	-0.143341	-0.0356294	-0.247996	0.0151291
11612	4	63	28	mMC015024	Tagln-NM_11526-mMC015024	1.59726	0.412621	0.704427	0.208471	0.221806	0.105897	0.000994227
9747	2	101	19	mMR029357	BC061928-NM_172861-mMR029357	1.59699	-0.431762	-0.576901	0.699266	-0.494117	-0.254678	0.0227073
5260	2	65	12	mMC006243	4732460I24-XM_489249-mMC006243	1.59643	0.774665	1.38572	-0.205388	0.175101	-0.399792	9.25969e-05
9092	3	85	4	mMC008093	Etv6-NM_7961-mMC008093	1.59602	1.13831	1.18969	-1.10794	0.324197	-0.669964	9.65431e-05
11423	4	57	31	mMC014864	Gga1-NM_145929-mMC014864	1.59555	0.455199	1.00583	-0.264891	0.0445389	0.909728	0.00211374
6094	2	91	14	mMC008748	A230053A07Rik-XM_144076-mMC008748	1.59551	-0.0151113	0.91972	-0.210508	-0.0174639	-0.555638	0.00870173
17588	6	34	20	mMC012581	9430069J07Rik-NM_213727-mMC012581	1.59513	0.206624	0.570307	-0.435811	-0.447996	-0.383302	0.0162608
2464	1	77	32	mMC007496	Olfr270-NM_146607-mMC007496	1.5951	0.561335	1.27954	0.231045	-0.321047	1.94532	0.0370987
791	1	25	23	mMC002551	A330033J07Rik-No acc-mMC002551	1.59381	1.32417	1.36516	0.486094	0.652015	-0.00776681	0.260514
4633	2	45	25	mMC004399	1700020C11Rik-NM_26443-mMC004399	1.59374	0.478437	0.48699	-0.219261	-0.122024	-0.140442	0.0757631
7720	2	38	8	mMC023050	Cdo1-NM_33037-mMC023050	1.59288	1.03127	0.984047	-0.368119	-0.191337	1.05524	0.0104378
7598	3	38	14	mMC003748	C030015A19Rik-No acc-mMC003748	1.59231	-0.515489	-1.29666	0.3452	0.167309	-0.744419	0.229754
16716	6	7	12	mMC009803	Zfp358-NM_80461-mMC009803	1.59211	-0.0149422	0.581184	0.175122	-0.0899008	-0.54524	0.534302
2100	1	66	20	mMC006253	Nxph1-NM_8751-mMC006253	1.5897	1.16191	-0.549334	-0.203076	-0.209799	0.859162	0.775536
11442	4	58	18	mMC014726	C130040J23Rik-No acc-mMC014726	1.5889	-0.280266	1.42848	0.309384	-0.24294	-0.120014	0.14807
1679	1	53	15	mMC005235	Bdkrb1-NM_7539-mMC005235	1.58816	0.585623	0.169165	0.0530113	-0.153433	0.014762	0.0033192
5576	2	75	8	mMC007210	4930586N03Rik-No acc-mMC007210	1.5879	0.0710618	-1.50014	-0.252305	0.337465	-0.28295	0.174629
14999	5	61	23	mMC015127	Cpe-NM_13494-mMC015127	1.58786	0.754154	0.997158	-0.0707749	0.392507	-0.289421	0.00032233
11006	4	44	30	mMC013388	5330430P22Rik-No acc-mMC013388	1.58761	0.650462	1.38382	0.106736	0.0103898	-0.150148	0.0085852
11572	4	62	20	mMC015085	4933421A08Rik-No acc-mMC015085	1.58678	-0.148964	1.40842	0.325248	0.364009	-0.109793	0.0931726
17714	6	38	18	mMC012990	D3Bwg0562e-NM_177664-mMC012990	1.58652	0.177107	0.186712	0.223999	-0.104824	-0.897065	0.143972
14103	5	33	23	mMC012439	Aqp12-NM_177587-mMC012439	1.58627	0.75079	0.590292	-0.790746	-0.0144203	-0.221682	0.0361308
4760	2	49	24	mMC004735	Arrdc2-XM_134227-mMC004735	1.58625	-0.533156	-0.115301	0.0701055	0.129787	-1.25472	0.00470499
13321	5	9	9	mMC010130	B3galt5-NM_33149-mMC010130	1.5861	0.172831	0.852395	-0.0498476	-0.248221	0.139456	0.0108323
14282	5	39	10	mMC012994	Axl-NM_9465-mMC012994	1.58552	0.824095	1.0132	-0.0293656	-0.0410216	-0.346046	0.000557816
16932	6	14	4	mMC010685	Fxyd5-NM_8761-mMC010685	1.58482	-0.133726	-0.0996408	-0.443694	-0.245848	-0.143754	0.829782
13446	5	13	6	mMC010489	Cias1-NM_145827-mMC010489	1.58407	1.58495	1.41928	-0.830015	0.512683	-0.377373	0.00301489
18314	6	57	10	mMC014618	Trpm2-NM_138301-mMC014618	1.58334	0.467593	-0.31804	0.314014	-0.205248	-1.10306	0.12749
2804	1	88	20	mMR027957	Tbx5-NM_11537-mMR027957	1.58252	0.684521	0.898994	-0.855315	-0.115947	1.34969	0.00146676
7582	3	37	30	mMC003484	1700029H14Rik-NM_25601-mMC003484	1.58237	-0.243524	0.635592	0.363531	0.442142	-0.8991	0.219163
18161	6	52	17	mMC013990	Aldh3a1-NM_7436-mMC013990	1.58222	-0.0509946	0.155381	-0.0133944	-0.066129	-1.05543	0.0848577
9969	2	108	17	mMR029830	Ierepo2-No acc-mMR029830	1.58205	0.133501	0.10235	0.129042	-0.287579	0.0848523	0.0430926
17600	6	34	32	mMC012584	Msmb-NM_20597-mMC012584	1.58107	-0.403494	-0.209805	0.258287	0.119678	-0.597155	0.0572895
14923	5	59	11	mMC014963	6820408C15Rik-NM_177656-mMC014963	1.58083	0.992128	0.778715	-0.783377	-0.0679023	0.0880149	0.00296781
14455	5	44	23	mMC013319	Il3ra-NM_8369-mMC013319	1.58046	1.12655	0.565456	-0.955179	0.436968	-1.01139	0.000167526
8918	2	75	22	mMR026798	Magea7-NM_20281-mMR026798	1.57979	0.704934	0.316886	0.144834	0.0325765	0.245013	0.0704855
17413	6	29	5	mMC011953	2810025M15Rik-NM_27274-mMC011953	1.57967	1.03782	0.33983	0.219075	-0.541765	0.879381	0.229337
5799	2	82	7	mMC007762	Apoh-NM_13475-mMC007762	1.57937	1.11201	1.95239	-1.15698	-0.644676	2.14176	0.126766
9927	4	11	7	mMC010074	Cdh16-NM_7663-mMC010074	1.57921	0.014818	1.54143	-0.198483	0.115268	0.554816	0.0001081
8364	3	62	12	mMC006051	1810017G16Rik-NM_21502-mMC006051	1.57881	2.06935	2.09349	-0.827357	0.778651	0.605987	0.0328869
18992	6	78	16	mMC016827	4933417G07Rik-No acc-mMC016827	1.57855	-0.637627	-0.125906	-0.143363	-0.0773311	-0.296267	0.010587
1589	1	50	21	mMC004790	Spg21-NM_138584-mMC004790	1.57837	1.1589	0.774104	-0.0767263	0.29328	-0.592868	0.0623511
11453	4	58	29	mMC014748	4933436N17Rik-XM_488671-mMC014748	1.57812	0.872105	1.08068	0.466583	0.530396	-0.0417535	0.284728
14981	5	61	5	mMC015121	9630041C05-No acc-mMC015121	1.57809	0.664037	1.23893	0.102349	-0.166944	-0.102548	0.124689
12526	4	92	14	mMC017972	Hgd-NM_13547-mMC017972	1.57774	0.265555	0.224807	0.103819	0.0353429	0.655408	0.0374382
11904	4	72	32	mMC016056	Arfrp2-NM_172595-mMC016056	1.57699	-0.0516545	0.965416	-0.0616968	-0.0830345	0.0307269	0.00557847
5993	2	88	9	mMC008322	Gdi1-NM_10273-mMC008322	1.57547	-0.195218	0.528326	0.215994	0.115319	-0.61529	0.00041744
9374	3	93	30	mMC008860	Phf8-NM_177201-mMC008860	1.57508	0.165854	0.646533	0.388782	0.25563	-0.299223	0.417059
14034	3	31	18	mMC022502	H2-L-No acc-mMC022502	1.57498	1.07839	1.11858	-0.571012	-0.146259	-0.792831	0.00075521
15148	5	66	12	mMC015371	Egfl9-NM_134120-mMC015371	1.57371	0.814838	0.361769	0.024961	0.0591871	-0.231925	0.00159414
9301	3	91	21	mMC008726	Foxa3-NM_8260-mMC008726	1.57353	0.207206	-0.293742	0.240864	-0.184408	-0.816675	0.397275
2158	1	68	14	mMC006452	Rnf8-NM_21419-mMC006452	1.57275	1.31096	0.489964	-0.0364654	0.372889	-0.826879	0.0621074
16885	6	12	21	mMC010174	0610005A07Rik-XM_289885-mMC010174	1.5726	0.906725	1.16342	-0.325412	0.652578	-1.06626	0.000337827
7132	2	19	28	mMC021448	Park2-NM_16694-mMC021448	1.57199	-0.0477925	-0.767489	-0.0785119	-0.513536	0.472552	0.0439054
247	1	8	23	mMC020327	2010309E21Rik-NM_25591-mMC020327	1.57188	0.423348	0.27924	-1.10989	-0.349817	-0.296028	0.0473366
7300	2	25	4	mMC022013	A330068P14Rik-XM_126447-mMC022013	1.57083	0.399442	0.964763	-0.280201	-0.544488	1.01537	0.0268057
14836	5	56	20	mMC014421	Vps33b-NM_178070-mMC014421	1.5706	0.456545	0.112554	-0.0676846	0.0638198	-0.186045	0.0591939
2829	1	89	13	mMC008716	P2ry2-NM_8773-mMC008716	1.56964	0.692222	1.57718	-0.51817	0.0570533	-0.198748	1.6011e-06
2958	1	93	14	mMC009028	Akr7a5-NM_25337-mMC009028	1.56924	1.03638	0.88455	-0.18173	0.00884693	0.311993	0.0124589
15908	5	90	4	mMC017701	9630015D15Rik-NM_181401-mMC017701	1.56889	-0.0891582	0.648902	0.0790286	0.144431	0.176773	0.00393098
17692	6	37	28	mMC012704	Eme2-XM_128555-mMC012704	1.56885	-0.340149	0.384282	0.250271	-0.0931897	-0.626312	0.660409
14921	5	59	9	mMC014938	1500034E06Rik-XM_487174-mMC014938	1.56876	0.676625	0.997679	-0.573657	-0.133205	0.780765	0.0168493
3717	2	17	5	mMC001681	9430030N17Rik-No acc-mMC001681	1.56868	1.1117	1.37658	-0.149845	0.00672726	-0.876163	0.000140598
18158	6	52	14	mMC013940	Pqlc2-NM_145384-mMC013940	1.56857	0.248735	0.686881	0.181025	-0.105488	-0.505356	0.190398
18219	6	54	11	mMC014571	Actl7a-NM_9611-mMC014571	1.56812	0.0944529	0.708073	0.503575	-0.220387	-0.793586	0.379321
5947	2	86	27	mMC008128	Pld3-NM_11116-mMC008128	1.56797	0.835465	1.17311	-0.131671	-0.250202	-0.615437	0.127167
6134	2	92	22	mMC008662	Prok2-NM_15768-mMC008662	1.56696	0.48998	-1.80796	-0.079657	-0.0463346	0.499717	0.00179359
6331	2	98	27	mMC009280	Srpx2-NM_26838-mMC009280	1.56627	1.54939	-1.3438	-0.500621	0.160932	0.0379132	0.0001051
14184	5	36	8	mMC012498	Uqcrc2-NM_25899-mMC012498	1.56575	1.67887	0.74869	-0.861139	0.545211	-1.30566	8.40553e-05
3746	2	18	2	mMC001545	Pag-NM_53182-mMC001545	1.56538	-0.268308	-0.855677	0.231718	0.0645455	-0.694662	0.55431
16035	3	94	3	mMR028757	Mybbp1a-NM_16776-mMR028757	1.56521	-0.189928	0.926181	0.102069	-0.347018	-0.278033	0.0281426
15512	3	77	24	mMR026911	Bcl2a1b-NM_7534-mMR026911	1.56517	-0.464827	0.623214	0.878188	0.157076	-0.690917	0.0746817
18468	6	62	4	mMC015293	Insl6-NM_13754-mMC015293	1.5648	-0.096121	-0.524121	0.629626	-0.0740163	-0.535575	0.286838
11861	4	71	21	mMC015838	Clstn3-NM_153508-mMC015838	1.56423	0.00625735	1.71803	-0.0202908	0.106587	0.626882	0.00017544
7666	2	36	18	mMC022894	Chrnb2-NM_9602-mMC022894	1.56356	0.583687	-0.246356	-0.390682	-0.351397	0.97199	0.00457229
2830	1	89	14	mMC008644	Abca2-NM_7379-mMC008644	1.56269	0.714292	1.43744	0.012384	-0.173319	0.50245	0.00463742
1906	1	60	18	mMC005710	Aqp1-NM_7472-mMC005710	1.56189	-0.124479	-0.762109	0.556461	-0.242232	-1.00086	0.12408
13822	5	24	30	mMC011372	Fut2-NM_18876-mMC011372	1.56066	0.608248	0.0351693	-0.388442	0.504595	-0.840946	0.0761635
11368	4	56	8	mMC014514	C030017G13Rik-No acc-mMC014514	1.55987	-0.180913	1.22183	0.586969	0.261492	-0.0302641	0.0862178
17691	6	37	27	mMC012728	Ptprn-NM_8985-mMC012728	1.55957	0.802742	0.547606	0.209455	0.30661	0.0308768	0.337151
5629	2	76	29	mMC007172	4631423B10Rik-NM_175422-mMC007172	1.55954	0.625998	0.994733	-0.130026	-0.456715	-0.534318	0.0048157
11459	4	59	3	mMC014661	Il2rb-NM_8368-mMC014661	1.55772	0.530037	0.854935	0.371259	-0.0113411	0.465686	0.112552
10910	4	41	30	mMC013276	2310043L19Rik-No acc-mMC013276	1.55706	0.383002	1.36238	0.368738	-0.00739442	0.369538	0.504699
10433	4	27	1	mMC011609	4933427C19Rik-No acc-mMC011609	1.55689	0.919479	1.49827	0.614679	-0.0357155	0.578088	0.0757714
6202	2	94	26	mMC008847	Ccnb3-NM_183015-mMC008847	1.55613	1.32033	-2.88871	0.0354843	-0.534238	-0.790351	4.78141e-05
16819	6	10	19	mMC010349	Gcnt1-NM_10265-mMC010349	1.55497	0.170322	-0.234614	-0.233542	-0.128869	-0.474255	0.321243
11511	4	60	23	mMC014951	8030431J09Rik-No acc-mMC014951	1.55474	-0.156402	1.09507	0.49458	-0.0202605	-0.0902051	0.0459544
2844	1	89	28	mMC008672	1600020H07Rik-NM_19975-mMC008672	1.55452	0.129825	0.55175	0.219648	-0.810322	0.0548789	0.76325
13690	5	20	26	mMC010967	2010010A06Rik-No acc-mMC010967	1.55431	0.723977	0.758498	-0.488134	0.210437	-0.567114	0.00222679
18412	6	60	12	mMC014707	A330050F15Rik-No acc-mMC014707	1.55395	0.528112	0.454261	0.113764	0.0924985	-1.18384	0.0616607
19881	6	106	9	mMC019538	Ccr5-NM_9917-mMC019538	1.55369	-0.121411	-1.07	0.238478	0.0792263	-0.366109	0.248299
13520	5	15	16	mMC010691	Etfdh-NM_25794-mMC010691	1.5524	0.919682	0.944293	-0.6388	-0.0856398	0.256783	0.013164
11661	4	65	13	mMC015628	Myl3-NM_10859-mMC015628	1.55192	-0.00507789	1.17891	-0.093196	-0.121762	0.107149	0.00433397
13674	5	20	10	mMC010986	Egr1-NM_7913-mMC010986	1.55175	0.747216	0.107156	0.00351722	-0.0329647	0.148207	0.00679903
15128	5	65	24	mMC015487	C530015C18-NM_177681-mMC015487	1.55168	1.27733	0.560813	-0.879502	0.261991	-0.632933	0.00239569
15160	5	66	24	mMC015399	9430097D07Rik-NM_175679-mMC015399	1.55128	0.57547	0.334755	-0.771955	0.0325841	-0.0305031	0.0188794
5267	2	65	19	mMC006317	B130016L12Rik-NM_144835-mMC006317	1.55123	0.420676	0.148357	-0.284872	-0.135798	-0.641532	0.112825
18720	6	69	32	mMC015752	AI662270-No acc-mMC015752	1.55085	-0.573677	-0.35607	-0.221515	0.0565477	-0.202063	0.0867626
8525	3	67	13	mMC006420	1700027D21Rik-NM_29661-mMC006420	1.5506	-0.298908	-0.00492249	-0.0524025	0.345429	-0.671151	0.0187446
10594	4	32	2	mMC012209	Apof-NM_133997-mMC012209	1.55044	-0.750624	0.473769	0.00944996	-0.0426748	0.524616	0.538491
8046	2	48	14	mMC024020	Dpm2-NM_10073-mMC024020	1.54987	-0.399737	-0.155343	-0.0671156	0.273672	0.0531141	0.157366
14305	3	40	1	mMC023225	Abr-NM_198018-mMC023225	1.5484	-0.0465035	0.2599	-0.73016	-0.128632	-0.607819	0.00129275
6013	2	88	29	mMC008324	Scospondin-NM_173428-mMC008324	1.54777	0.699588	0.553142	-0.39681	-0.422072	-0.0910451	0.0989565
9232	3	89	16	mMC008475	1110031M08Rik-XM_355145-mMC008475	1.54764	0.200445	0.239104	0.0176522	-0.319294	-0.196851	0.828311
14933	5	59	21	mMC014966	Gk-rs1-NM_10293-mMC014966	1.54671	-0.796499	-0.129936	-0.219163	-0.139463	-0.258094	0.00174795
5470	2	71	30	mMC006852	5730466P16Rik-NM_173453-mMC006852	1.54644	0.644749	0.120565	-0.698643	0.16877	-1.41283	0.0291647
4468	2	40	20	mMC003669	4933404K13Rik-No acc-mMC003669	1.54543	0.596366	-0.2367	-0.0940402	-0.380149	0.522157	0.00292668
18052	6	49	4	mMC013853	Pemt-NM_8819-mMC013853	1.54509	0.556155	0.455891	-0.252968	-0.533129	0.133258	0.00597158
2156	1	68	12	mMC026035	Serpina3k-NM_11458-mMC026035	1.54497	1.53923	2.51962	-0.305729	0.618494	0.993923	0.0165944
10874	4	40	26	mMC012983	1700007I08Rik-No acc-mMC012983	1.54493	-0.015796	-0.624756	-0.688263	0.0151076	0.225171	0.132498
17488	6	31	16	mMC012131	Pla2g4b-XM_355378-mMC012131	1.54476	0.0674535	-0.168802	0.0913286	0.97827	-0.778876	0.153223
11398	4	57	6	mMC014809	Galc-NM_8079-mMC014809	1.54444	0.639339	1.63686	-0.049023	-0.0621584	1.21432	0.0408066
15518	5	77	30	mMC016636	E130120L08Rik-NM_177373-mMC016636	1.5444	0.508163	0.651709	-0.294733	-0.141965	-0.151486	0.0112959
1054	1	33	30	mMC022876	Bglap1-NM_7541-mMC022876	1.5444	0.630236	0.339695	-0.555078	-0.171305	-0.0447107	0.0717931
14410	5	43	10	mMC013378	Ggt1-NM_8116-mMC013378	1.54433	1.56004	0.687331	-0.0772756	0.222664	-0.634225	0.00118635
16681	6	6	9	mMC009938	Mcoln2-NM_1005846-mMC009938	1.54394	-0.0836259	1.73615	-0.330841	0.313954	-0.636705	0.0247583
15553	5	79	1	mMC016881	Pmaip1-NM_21451-mMC016881	1.54289	-0.00900788	0.265707	0.0937171	0.330244	-0.316377	0.268036
5343	1	167	31	mMO035424	Aup1-NM_7517-mMO035424	1.54235	1.04087	1.60066	-0.668244	-0.178795	-0.635245	5.6184e-05
10875	4	40	27	mMC013032	Mpeg1-XM_129176-mMC013032	1.54197	0.3159	0.321219	-0.00773066	-0.510582	1.2198	0.020104
17511	6	32	7	mMC012090	Slc3a2-NM_8577-mMC012090	1.54184	-0.190119	0.399644	-0.54601	-0.238421	-0.342327	0.000148868
14164	5	35	20	mMC012589	Zfp281-NM_177643-mMC012589	1.54134	0.0538255	0.00124754	-0.30475	0.389389	-0.219449	0.00190501
14096	5	33	16	mMC012411	1810063P04Rik-NM_24440-mMC012411	1.54128	-0.425731	0.0813503	0.208839	-0.274083	0.511649	0.540645
5773	2	81	13	mMC007852	C1qbp-NM_7573-mMC007852	1.54119	1.15316	1.14488	-0.792173	-0.195545	-1.74206	0.0104188
9429	3	95	21	mMC009110	Tm4sf11-NM_26385-mMC009110	1.54102	-0.317177	0.144931	0.235336	-0.0374767	-0.771591	0.208522
7780	2	40	4	mMC023277	E430039K05Rik-NM_177318-mMC023277	1.54086	0.399675	0.512941	-0.49634	-0.221257	0.267189	0.000668266
13943	5	28	23	mMC011783	Fgfr4-NM_8011-mMC011783	1.54073	0.850502	1.15606	-0.800133	0.0318559	-0.27749	0.00137725
17458	6	30	18	mMC012222	Grcc9-NM_13539-mMC012222	1.54007	-0.189409	0.51987	-0.236722	0.0372453	-0.383173	0.0712144
8949	3	80	21	mMC007486	Olfr1508-NM_20513-mMC007486	1.53814	-0.0812019	-1.89255	0.051865	-0.118298	-0.579385	0.156281
18045	6	48	29	mMC013604	4932411K12-NM_177812-mMC013604	1.53802	-0.861178	-0.155742	-0.523904	0.19839	-0.719529	0.00614953
7673	2	36	25	mMC022943	Gli2-XM_136212-mMC022943	1.53789	-0.218373	-0.244426	-0.181861	-0.140444	-0.290351	0.21803
3495	2	10	7	mMC000850	Cxcl16-NM_23158-mMC000850	1.53744	0.718555	1.66877	-0.208515	-0.140813	0.141613	0.0301198
2706	1	85	18	mMC008286	2700087H15Rik-NM_27422-mMC008286	1.5373	0.648038	-0.162187	0.522328	-0.000805846	-0.561127	0.295262
18847	6	73	31	mMC016208	H2-M10.2-NM_177923-mMC016208	1.53687	-0.689619	-1.27436	0.677199	0.740032	-0.99361	0.0741942
7763	2	39	19	mMC023413	Pcdhgb4-NM_33576-mMC023413	1.53671	-0.234048	0.911634	0.10644	-0.300357	-0.128152	0.00248582
3848	2	21	8	mMC002018	Itga8-NM_1001309-mMC002018	1.53624	-0.298141	-1.0722	0.696018	-0.217914	-0.393593	0.926131
19787	6	103	11	mMC019091	Zap70-NM_9539-mMC019091	1.53613	-0.00682546	-0.587644	0.506472	-0.365999	-0.0796503	0.2274
16390	3	105	6	mMR029593	4930543D07Rik-No acc-mMR029593	1.53573	-0.0568772	2.31243	0.657719	0.675502	0.122768	0.00546658
9321	3	92	9	mMC008610	C030032O16Rik-No acc-mMC008610	1.53421	1.60155	0.0646263	-0.219487	0.265689	-0.947396	0.140188
15486	5	76	30	mMC016364	3010024O21Rik-No acc-mMC016364	1.53388	0.53705	0.775814	-0.100981	0.0198107	-0.113294	0.124935
9433	3	95	25	mMC009111	4930512P04Rik-No acc-mMC009111	1.53363	-0.894666	-0.295422	0.0226968	-0.336862	-1.04035	0.0297871
2244	1	71	4	mMR026157	Gsta2-NM_8182-mMR026157	1.53356	1.17563	1.63629	-0.35711	-0.0550566	0.608063	0.0217231
13705	5	21	9	mMC011282	Fbxo2-NM_176848-mMC011282	1.53337	0.995923	1.04064	-1.03276	-0.306504	0.547911	0.00772411
12023	4	76	23	mMC016487	Zfp57-NM_9559-mMC016487	1.53327	-0.118824	0.504626	0.174342	-0.0167519	-0.0887172	0.0204252
17250	6	24	2	mMC011249	Mical3-NM_153396-mMC011249	1.53273	0.0634733	0.26195	-0.180435	0.2113	0.300705	0.252166
13635	5	19	3	mMC011101	Fem1a-NM_10192-mMC011101	1.53238	0.800264	1.2595	-0.464057	-0.0905005	-0.0219768	0.00114425
10663	4	34	7	mMC012466	Slc39a2-XM_139051-mMC012466	1.5323	-0.429627	1.4024	0.228475	-0.106041	0.0651646	0.0153248
12915	4	104	19	mMC019197	Rpl36a-NM_19865-mMC019197	1.53221	-0.060636	-0.0115412	0.932202	0.584629	0.446054	0.423812
18780	6	71	28	mMC015976	4930556P03Rik-NM_29236-mMC015976	1.53212	-0.0808199	0.472377	0.299539	0.0550228	-0.711933	0.540552
1595	1	50	27	mMC004768	4632433K11Rik-NM_29849-mMC004768	1.53189	0.729133	-4.11642	-0.140516	0.00401687	-0.548308	6.98846e-08
243	1	8	19	mMC020349	Atp5h-NM_27862-mMC020349	1.53131	0.764661	1.55993	-0.521113	-0.277982	1.00962	0.0125313
17009	6	16	17	mMC010534	4930565B19Rik-No acc-mMC010534	1.53091	0.992867	1.61743	-0.244366	0.129227	-0.332671	0.0320872
13746	5	22	18	mMC011174	0610009B10Rik-XM_127484-mMC011174	1.53067	0.408362	1.15258	-0.337187	-0.433254	0.0875463	0.00880584
7795	3	44	19	mMC004029	Fads1-NM_146094-mMC004029	1.53061	-0.68695	-0.43548	0.106642	-0.232327	0.532119	0.0480855
10822	4	39	6	mMC012713	0610007P22Rik-NM_26676-mMC012713	1.53049	0.24393	1.19685	0.261984	0.246307	-0.660285	0.0215157
2602	1	82	10	mMC007810	Olfr514-NM_146726-mMC007810	1.53037	0.0623528	-1.81259	0.14459	-0.308519	0.222999	0.323092
7437	2	29	13	mMC022444	AI194308-NM_138752-mMC022444	1.52816	0.990391	0.480548	-0.442676	-0.119824	0.0884279	0.00870369
1838	1	58	14	mMC005484	4930405A07Rik-No acc-mMC005484	1.52736	0.924819	0.642585	0.146857	0.0863296	-1.00339	0.0345244
14986	5	61	10	mMC015098	Dpysl2-NM_9955-mMC015098	1.52692	0.65628	0.306245	-0.110441	-0.18016	-0.0476176	0.0180081
6984	2	15	8	mMC021034	Rps11-NM_13725-mMC021034	1.52576	0.685464	0.580464	-0.252122	-0.176309	-0.390932	0.193351
6072	2	90	24	mMC008487	4921507L20Rik-No acc-mMC008487	1.52537	0.534443	0.111865	-0.123589	-0.151339	-0.54757	0.205051
4523	2	42	11	mMC003923	Car6-NM_9802-mMC003923	1.52536	0.782928	0.0419187	-0.127527	0.0427215	-0.799017	0.00995745
2371	1	75	3	mMC006981	5033430J17Rik-No acc-mMC006981	1.5247	-0.399273	0.349781	0.66781	0.305274	0.0204361	0.393164
15615	5	80	31	mMC016800	Rcor3-NM_144814-mMC016800	1.52454	0.641888	1.28671	-1.42138	0.0102813	0.71389	0.000163443
9041	2	79	17	mMR027230	Reln-NM_11261-mMR027230	1.52317	-0.415876	0.37217	0.251157	-0.262919	0.796104	0.12054
1202	1	38	18	mMC003590	Plcd3-NM_152813-mMC003590	1.52154	0.888262	-0.28652	0.493581	0.26214	-1.19525	0.538117
6044	2	89	28	mMC008576	Snai3-NM_13914-mMC008576	1.52082	1.25707	1.13251	-0.554784	-0.0376722	-1.30575	0.000417709
15374	5	73	14	mMC016228	2610318C08Rik-NM_181589-mMC016228	1.52013	0.782795	0.989313	-0.252044	0.485982	-0.349861	0.0085692
6976	2	14	32	mMC020752	BC005624-NM_144885-mMC020752	1.51974	0.213887	0.0670068	-0.674561	-0.341611	-0.180969	0.0143603
2876	1	90	28	mMC008584	Cacna1a-NM_7578-mMC008584	1.51972	0.354655	-0.326038	-0.368633	0.121944	-0.892316	0.0414109
10618	4	32	26	mMC012215	Lrp8-NM_53073-mMC012215	1.51941	0.586075	1.49109	0.0625751	0.168217	-0.217567	0.342689
10555	4	30	27	mMC012064	A730016A17-No acc-mMC012064	1.51881	-0.272345	1.40913	-0.175303	-0.175284	0.166517	0.336939
11245	4	52	13	mMC014204	Muc2-XM_133960-mMC014204	1.51865	1.79479	2.87628	-0.970838	0.798831	0.968672	8.52382e-05
11631	4	64	15	mMC015331	A930031F18Rik-NM_29992-mMC015331	1.51861	-0.839076	1.31172	0.0476483	-0.143812	-0.0700927	0.00114619
15182	5	67	14	mMC015660	4933417A18Rik-NM_25750-mMC015660	1.51846	0.157562	0.487473	0.0495026	0.168466	0.177784	0.282625
14869	5	57	21	mMC014766	4921524M04Rik-No acc-mMC014766	1.51831	0.117201	-0.191381	-0.00916062	0.0520302	-0.0480717	0.445288
3834	1	120	26	mMR031031	Syn2-NM_13681-mMR031031	1.51761	-0.233407	0.8796	-0.196587	-0.339455	0.148646	0.117757
7564	2	33	12	mMC022755	Swap70-NM_9302-mMC022755	1.51759	0.721835	0.39371	-0.436618	0.503273	-0.709667	0.0449203
17766	6	40	6	mMC012809	3010003L10Rik-No acc-mMC012809	1.51703	0.214297	1.59592	-0.628134	-0.18203	1.20401	0.00187433
7851	2	42	11	mMC023507	Gab3-NM_153073-mMC023507	1.51576	0.333215	1.05985	-0.96341	-0.0275136	-0.476617	0.0567206
782	1	25	14	mMC022084	2010012F05Rik-NM_29362-mMC022084	1.51412	0.32586	1.02594	-0.0219889	-0.342124	1.45705	0.14918
7251	2	23	19	mMC021877	Olfr694-NM_146452-mMC021877	1.51411	0.169144	0.976206	-0.806805	-0.433888	-0.386737	0.00563341
13780	5	23	20	mMC011437	Myst3-XM_146248-mMC011437	1.51344	0.567535	1.39718	-0.713119	0.0511626	-0.00358169	0.000260316
11698	4	66	18	mMC015494	Ptges2-NM_133783-mMC015494	1.51322	-0.132057	2.16052	-0.220717	-0.148416	0.250762	0.000320757
13138	3	3	18	mMC019814	Sult2a2-NM_9286-mMC019814	1.51271	0.771008	0.547748	-0.130553	-0.504049	1.61248	0.00771692
11628	4	64	12	mMC015283	C530025M09Rik-XM_485076-mMC015283	1.51185	0.485125	1.2745	-0.0368602	0.594962	-0.10032	6.14822e-05
18312	6	57	8	mMC014594	A430092G05Rik-No acc-mMC014594	1.51137	-0.0745138	0.16406	0.173031	-0.312683	-0.419011	0.0129365
16849	6	11	17	mMC010238	Paqr4-NM_23824-mMC010238	1.51058	0.587305	-0.189649	0.0442728	-0.0445267	-0.81309	0.330569
13216	5	5	32	mMC009704	Pex11c-NM_26951-mMC009704	1.51054	-0.233507	0.921297	-0.508879	-0.200825	-0.0235898	0.0409731
1876	1	59	20	mMC005397	Dnaja4-NM_21422-mMC005397	1.50987	0.532243	0.291154	0.57126	-0.377666	-0.0954759	0.745619
15793	5	86	17	mMC017342	A830080L01Rik-No acc-mMC017342	1.50976	0.169982	-0.648785	-0.180097	0.179228	0.130206	0.0599669
1565	1	49	29	mMC004852	Ifnt1-NM_177348-mMC004852	1.50963	0.49691	0.518158	-0.414295	0.254419	-0.78597	0.00795509
14029	5	31	13	mMC012276	2600011E07Rik-XM_127745-mMC012276	1.50888	0.0462886	-0.182327	-0.00584675	-0.0830238	0.564362	0.00204826
15226	5	68	26	mMC015575	G431001E03Rik-NM_177364-mMC015575	1.50852	0.529693	-0.274378	-0.717367	-0.0285551	-0.130328	0.000143623
10144	4	17	32	mMC010952	Abcc6-NM_18795-mMC010952	1.50798	0.341575	1.21864	-0.219202	0.172412	0.0778688	0.163588
18255	6	55	15	mMC014459	C530001K22Rik-No acc-mMC014459	1.50767	0.212396	1.13636	0.101078	-0.0163497	-0.461591	0.095328
1283	1	41	3	mMC023669	Cyp2c50-NM_134144-mMC023669	1.50647	1.02229	0.741093	-0.936857	0.640295	-0.417777	0.0759165
18930	6	76	18	mMC016270	Cyp2j13-NM_145548-mMC016270	1.50608	1.06429	0.172014	0.115675	-0.189538	1.40817	0.21542
7053	2	17	13	mMC021292	4930412E21Rik-No acc-mMC021292	1.5059	0.510363	1.69369	-1.01969	0.179925	-0.142155	0.0379342
7341	2	26	13	mMC021972	Crhbp-NM_198408-mMC021972	1.50572	0.486925	-0.210999	-0.354634	-0.140781	0.0576476	0.0591657
1725	1	54	29	mMC005148	Adar-NM_19655-mMC005148	1.50515	0.098299	-1.40769	0.455671	-0.334391	-0.682898	0.0368933
18030	6	48	14	mMC013556	Atp9a-NM_15731-mMC013556	1.50509	0.209345	0.773728	-0.0822952	0.215783	-0.329181	0.00626053
7236	2	23	4	mMC021829	4930449E07Rik-NM_29044-mMC021829	1.50495	0.568803	0.587807	-1.0484	-0.126228	-0.634405	0.00787136
13871	5	26	15	mMC011579	Drd2-NM_10077-mMC011579	1.50384	0.767117	0.390942	0.190946	-0.0581707	0.0798024	0.0700616
365	1	12	13	mMC020732	Irf7-NM_16850-mMC020732	1.50361	0.0927454	1.3462	-0.901072	0.180724	0.818953	0.1522
17603	6	35	3	mMC012541	1700030M09Rik-No acc-mMC012541	1.50332	-0.2711	0.646859	-0.172206	0.421186	-0.85191	0.0159134
9009	3	82	17	mMC008022	Tsga10ip-XM_355133-mMC008022	1.50329	0.701646	1.3206	-0.0462406	-0.14592	-0.204142	0.00504837
11526	4	61	6	mMC015193	Lalba-NM_10679-mMC015193	1.50254	-0.268258	0.246943	0.569786	0.129521	-0.0614265	0.726993
13410	5	12	2	mMC010193	Cpn1-NM_30703-mMC010193	1.50114	1.24137	0.653039	-0.480658	-0.0218625	-0.242732	6.8186e-05
10696	4	35	8	mMC012306	BC025575-NM_199200-mMC012306	1.50061	0.497564	1.36072	-0.214548	-0.0905841	1.40358	0.0333932
13295	5	8	15	mMC009859	Il17c-NM_145834-mMC009859	1.49979	1.8077	1.22257	-0.953169	0.480827	-0.30899	9.12006e-05
7242	3	27	10	mMC002530	Olfr315-NM_146538-mMC002530	1.499	0.228073	0.778371	-0.512295	-0.282919	-0.766457	0.00166227
9590	3	100	22	mMC009334	4933415A04Rik-No acc-mMC009334	1.49894	0.746762	-0.0440985	0.416877	-0.0550754	-0.974661	0.0983276
16712	3	115	8	mMR030538	Akt2-NM_7434-mMR030538	1.49836	-0.144875	1.28979	-0.115493	-0.298218	-0.030277	0.101406
10868	4	40	20	mMC012981	Asb8-NM_30121-mMC012981	1.49822	-0.267204	0.978926	-0.3754	0.0213483	0.110211	0.0487919
6120	2	92	8	mMC008658	Myoc-NM_10865-mMC008658	1.49731	1.33277	0.488001	-0.482812	0.370888	-0.188357	0.0430844
12238	4	83	14	mMC016916	Adck2-NM_178873-mMC016916	1.49666	0.068829	1.0305	0.354772	-0.208297	0.282409	0.00023627
4068	2	28	4	mMC002541	Polr3f-NM_27417-mMC002541	1.49665	-0.169533	1.0119	0.247658	-0.366558	-0.063847	0.438968
6307	2	98	3	mMC009277	1810010M01Rik-NM_26918-mMC009277	1.49644	0.612543	1.048	0.0996668	-0.0618317	-0.432409	0.00101734
15161	5	66	25	mMC015447	AI451006-NM_178919-mMC015447	1.49603	0.216043	-0.0600773	-0.807606	0.0825765	-0.0834591	0.00466223
15020	5	62	12	mMC014987	4930405L22Rik-No acc-mMC014987	1.49489	0.0150849	0.358613	-0.105504	-0.231544	0.304985	0.0336519
5111	2	60	23	mMC005639	9130231C15Rik-NM_133960-mMC005639	1.49485	-0.167541	-0.0617077	0.0997715	-0.277142	-0.242153	0.308195
18966	6	77	22	mMC016518	1810073O08Rik-No acc-mMC016518	1.49474	0.214423	-0.380248	0.345236	-0.205043	-1.31222	0.304375
2953	1	93	9	mMC009074	Slc27a2-NM_11978-mMC009074	1.49422	0.138736	0.544372	-0.0274205	-0.225426	1.44069	0.0123697
9813	4	7	21	mMC009694	Thrap3-NM_146153-mMC009694	1.49403	0.307172	0.591359	0.171504	-0.29175	-0.163334	0.0163233
12556	4	93	12	mMC018243	Il13-NM_8355-mMC018243	1.49352	-0.23587	1.24285	0.430195	-0.23842	0.281312	0.24736
14155	5	35	11	mMC012659	Crhr2-NM_9953-mMC012659	1.49327	0.524032	1.27979	-0.359358	-0.0343114	-1.02157	0.00171204
5706	2	79	10	mMC007618	D930006K15Rik-No acc-mMC007618	1.49326	0.0166947	0.590222	-0.253428	-0.137715	-0.351083	0.508883
17586	6	34	18	mMC012606	Gtl2-NM_144513-mMC012606	1.49241	-0.232009	-0.952517	-0.0446347	-0.127699	-0.876422	0.297149
5879	2	84	23	mMC007943	Gpr84-NM_30720-mMC007943	1.49201	0.323829	-0.266985	0.166348	-0.0954456	-0.753094	0.28419
3120	1	98	16	mMC009347	Cabin1-XM_354546-mMC009347	1.49167	0.614695	0.593393	-0.159369	-0.0146247	-0.280347	0.0148119
6192	2	94	16	mMC008867	Mlp-NM_10807-mMC008867	1.49158	1.36946	-0.327755	-0.494412	0.779291	-0.624535	0.0292943
14995	5	61	19	mMC015149	Foxp4-NM_28767-mMC015149	1.4898	1.10037	0.571121	-0.406175	0.176219	-0.131424	0.0851243
9791	4	6	31	mMC009784	Jph2-NM_21566-mMC009784	1.48925	0.896406	1.20546	-0.0338119	0.184472	-1.07901	0.00606778
11634	4	64	18	mMC015310	Rpia-NM_9075-mMC015310	1.48882	0.955297	1.28604	0.0972047	0.978107	-0.257923	0.0542727
4747	2	49	11	mMC004779	2010106G04Rik-No acc-mMC004779	1.48833	0.283846	-0.727385	0.0326446	0.0902446	-0.826948	0.0286158
17201	6	22	17	mMC011478	5031425F14Rik-No acc-mMC011478	1.48824	0.518957	1.33773	-0.245005	0.510816	-0.153564	0.0830329
3856	2	21	16	mMC002043	Hnrpul1-NM_144922-mMC002043	1.48702	0.610222	0.986905	0.379114	-0.0524517	-0.135255	0.220574
19689	6	100	9	mMC018594	Sesn1-XM_125538-mMC018594	1.48612	0.120266	0.839733	0.21552	0.104048	0.529779	0.188963
6399	2	100	31	mMC009504	Gak-NM_153569-mMC009504	1.48596	2.08616	1.33118	-0.209003	-0.000707074	-0.386868	0.165233
16744	6	8	8	mMC009714	Myoz1-NM_21508-mMC009714	1.48491	-0.584988	-0.818692	-0.255594	-0.26489	-0.438959	0.546109
16784	6	9	16	mMC010011	Sppl3-XM_485673-mMC010011	1.48483	-0.353422	0.423537	0.115097	-0.291222	-0.526741	0.482249
16838	6	11	6	mMC010209	Pccb-NM_25835-mMC010209	1.48468	0.505526	0.293428	-0.0377063	-0.20089	0.0862407	0.0574297
9911	4	10	23	mMC010143	1700029G01Rik-NM_25856-mMC010143	1.48389	0.559605	0.649469	-0.0338203	-0.37394	0.791252	0.0165129
14054	3	32	6	mMC022409	Zfp59-NM_11762-mMC022409	1.48228	0.0779883	0.966957	-0.779133	-0.257287	-0.101946	0.101769
9975	2	108	23	mMR029831	Gsta1-NM_8181-mMR029831	1.48169	1.75416	1.3258	-0.177197	-0.010508	-0.167121	0.000138741
13551	5	16	15	mMC010627	Gbx2-NM_10262-mMC010627	1.48154	-0.062409	-0.202564	-0.520001	0.139722	-1.06264	0.00396091
5543	2	74	7	mMC006994	Dap-NM_146057-mMC006994	1.48095	0.607802	0.683331	0.347961	0.609063	-0.677987	0.020131
13462	3	13	22	mMC020742	2210018M11Rik-No acc-mMC020742	1.4808	-0.192913	0.667981	0.11713	-0.286319	-0.437442	0.00980629
14901	5	58	21	mMC014678	Mal-NM_10762-mMC014678	1.48013	0.620399	0.682502	0.144032	0.126113	-0.102697	0.00496028
7947	3	49	11	mMC004683	Ghrhr-NM_1003685-mMC004683	1.47967	0.805044	0.558501	-0.0998307	0.215516	-1.05876	0.0819119
2587	1	81	27	mMC007928	Adm2-NM_182928-mMC007928	1.47913	0.415391	0.815321	0.0725576	-0.214202	-0.325101	0.0097931
1235	1	39	19	mMC003549	Slc17a2-NM_144836-mMC003549	1.47907	-0.497955	1.35809	0.850041	-0.416231	0.0452235	0.0239838
18980	6	78	4	mMC016829	Car5b-NM_19513-mMC016829	1.47867	0.383471	0.253531	-0.274655	0.756388	-0.766249	0.00831863
1209	1	38	25	mMC023223	Atp5g1-NM_7506-mMC023223	1.47847	0.792088	1.65553	-0.684751	-0.217952	0.221012	0.254327
12382	4	87	30	mMC017324	Adamts7-NM_1003911-mMC017324	1.47782	0.0535561	-0.410123	0.0462824	0.294654	0.0236436	0.0207433
1739	1	55	11	mMC024667	Serpina1a-NM_9243-mMC024667	1.47677	0.71465	2.17279	-1.03994	-0.199216	1.54875	0.0704346
1330	1	42	18	mMC023558	Rpl7-NM_11291-mMC023558	1.47603	1.03821	0.175235	-0.23746	-0.189641	-0.699401	0.0696996
12540	4	92	28	mMC018000	Cited2-NM_10828-mMC018000	1.47552	0.133647	0.139658	-0.0884702	0.267615	0.286761	0.0126251
18229	6	54	21	mMC014574	Tom1-NM_11622-mMC014574	1.47523	-0.314513	0.505406	0.0457444	-0.131573	-0.63294	0.0184632
15302	5	71	6	mMC016065	4930403D09Rik-No acc-mMC016065	1.47351	0.588029	1.0279	-0.0721672	0.157643	-0.199536	0.114512
10440	4	27	8	mMC011538	Myo15-NM_10862-mMC011538	1.47283	0.410912	1.88069	-0.32841	-0.153032	0.524109	0.000215035
13284	5	8	4	mMC009837	D6Ertd474e-XM_489158-mMC009837	1.47015	0.603795	-0.207035	-0.243666	0.437959	-0.725287	0.00349998
17702	6	38	6	mMC012985	Fzd9-XM_284144-mMC012985	1.47011	-0.338356	0.0553349	-0.156348	0.00257903	-0.295914	0.101352
8286	2	55	30	mMC024900	Sh2d4b-XM_127666-mMC024900	1.4701	-0.405167	0.254045	-0.777989	-0.235981	-1.53425	0.0435215
5843	2	83	19	mMC008053	Gdpd2-NM_23608-mMC008053	1.46947	0.55212	0.939165	-0.15126	-0.229078	-0.283711	0.39177
18116	6	51	4	mMC014053	Nedd9-NM_17464-mMC014053	1.46946	0.585811	0.19479	0.0167235	0.330912	-1.49867	0.0836848
4268	2	34	12	mMC003083	Pzp-NM_7376-mMC003083	1.46895	-0.934917	1.43779	0.28313	-0.725906	1.79245	0.175167
18362	6	58	26	mMC014887	AI316787-NM_199199-mMC014887	1.46893	-0.175058	-0.935581	1.91884	-0.0292011	-0.435104	0.492344
15057	5	63	17	mMC015326	1500016L11Rik-NM_26885-mMC015326	1.46852	-0.147569	0.512183	0.100804	-0.110699	-0.496409	0.00174038
10834	4	39	18	mMC012718	Pde10a-NM_11866-mMC012718	1.46771	-0.33387	1.1509	0.160245	-0.193272	0.0575253	0.147619
5745	2	80	17	mMC007558	Bzrp-NM_9775-mMC007558	1.46742	1.00776	0.867458	-0.619255	0.0528302	0.733682	0.000641267
9529	2	94	25	mMR028503	D3Ertd300e-NM_19995-mMR028503	1.46729	-0.132069	0.559802	0.444501	0.123135	0.132776	0.405715
5566	2	74	30	mMC006948	5033405D04Rik-No acc-mMC006948	1.46676	1.04567	0.80837	-0.375777	0.485715	0.266277	0.0318267
14712	5	52	24	mMC014063	Il9r-NM_8374-mMC014063	1.46615	1.33317	1.46575	-0.119409	0.48213	0.161238	0.000265141
8237	3	58	13	mMC005740	A630042L21Rik-NM_134134-mMC005740	1.46574	-0.308418	-1.50744	-0.221051	-0.0736551	-0.740443	0.321443
7229	2	22	29	mMC021564	6330581N18Rik-NM_176915-mMC021564	1.46549	1.18974	0.788586	-0.99334	0.451854	-0.0616423	0.0790498
8587	3	69	11	mMC006603	A730042J05Rik-NM_178708-mMC006603	1.465	0.7189	0.916713	-0.202532	-0.138405	-0.51045	0.561094
17171	6	21	19	mMC011213	Edg8-NM_53190-mMC011213	1.46323	0.550658	-0.808113	0.359586	0.274178	-0.407808	0.369911
14249	5	38	9	mMC012730	1810017N16Rik-NM_175402-mMC012730	1.46283	0.686891	1.07339	-0.620772	0.223226	-0.0310131	0.00206565
15267	5	70	3	mMC015805	2410124H12Rik-XM_128328-mMC015805	1.46218	0.60352	0.927097	-0.230654	0.1695	0.0723162	0.00290621
8823	3	76	23	mMC007079	5830426C09Rik-No acc-mMC007079	1.46173	-0.375763	0.500385	-0.331511	0.0222179	-0.697823	0.15259
11292	4	53	28	mMC014432	AW125441-No acc-mMC014432	1.46161	0.391118	0.155892	0.261651	-0.128704	0.568964	0.165913
14125	5	34	13	mMC012372	Tnrc15-NM_146112-mMC012372	1.46151	0.595927	0.828368	-0.743158	0.121755	-0.340415	0.000527749
17857	6	43	1	mMC013329	4930432O09Rik-No acc-mMC013329	1.46098	0.361097	-0.355381	-0.731133	0.0627938	-0.266772	0.0860692
15907	5	90	3	mMC017725	Arl6ip1-NM_19419-mMC017725	1.46062	0.0841329	0.643317	0.261273	-0.0462304	0.152395	0.000498259
15627	5	81	11	mMC017067	4930517K11Rik-NM_26594-mMC017067	1.45979	-0.140217	-0.0384277	0.246031	-0.192523	-0.158399	0.347764
3919	2	23	15	mMC002267	Ephb4-NM_10144-mMC002267	1.45924	0.928599	0.686382	0.0168018	0.318459	-0.40676	0.321432
13576	3	17	8	mMC021122	Brp44l-NM_18819-mMC021122	1.45816	0.364136	-0.163233	0.112945	0.099865	0.284121	0.200443
13942	5	28	22	mMC011734	Smarca3-NM_9210-mMC011734	1.45768	0.231897	0.32103	-0.395232	-0.0137202	-0.347988	0.000780036
5560	2	74	24	mMC006951	1110025F24Rik-NM_26393-mMC006951	1.45746	1.20309	-4.91103	0.0282023	0.382546	-0.335327	2.06751e-07
16666	6	5	26	mMC009607	Rims4-NM_183023-mMC009607	1.45616	-0.268412	0.876774	-0.491698	-0.107764	-0.0768085	0.0341998
13976	5	29	24	mMC012031	4930442H23Rik-No acc-mMC012031	1.45613	-0.275194	0.723786	-0.575331	0.0966685	-0.361374	0.00908754
8712	3	73	8	mMC006914	Casq2-NM_9814-mMC006914	1.45609	-0.00734972	-0.0250125	-0.141864	0.0420849	-0.4178	0.049764
13799	3	24	7	mMC021690	Bcorl1-NM_178782-mMC021690	1.45609	-0.297589	0.554577	-0.82107	-0.348877	-0.189205	0.00693911
15758	5	85	14	mMC017380	9330111N05Rik-No acc-mMC017380	1.45522	0.0884312	1.02564	0.1315	0.246743	-0.393141	0.000306491
11708	4	66	28	mMC015496	Frs3-NM_144939-mMC015496	1.45505	-0.22146	0.261411	0.0846138	-0.00901993	-0.126089	0.640599
11774	4	68	30	mMC015692	Olfr669-NM_147043-mMC015692	1.45468	0.424557	0.555022	0.0453385	0.0490444	0.233953	0.211579
14005	5	30	21	mMC011990	Heph-NM_10417-mMC011990	1.45465	0.440745	1.13797	-0.677839	-0.25983	-0.104046	0.000515487
15027	5	62	19	mMC015061	BC019560-XM_125947-mMC015061	1.45415	0.815053	-0.35335	-0.673541	0.171314	0.191631	0.0294403
3528	1	111	8	mMR029970	Krtdap-No acc-mMR029970	1.45227	0.85639	0.358058	0.558502	-0.159662	1.09872	0.142226
5262	2	65	14	mMC006244	Mgst1-NM_19946-mMC006244	1.45159	0.00497408	-1.04999	0.069305	0.139758	-0.662941	0.715519
15438	5	75	14	mMC016428	2810405I11Rik-NM_24190-mMC016428	1.45149	0.292719	0.840653	-0.26348	-0.0960352	-0.0240685	0.148782
17597	6	34	29	mMC012628	Atp11a-NM_15804-mMC012628	1.4504	-0.544026	0.283493	0.0208573	0.157873	-0.804502	0.055021
13969	5	29	17	mMC012054	Ier3-NM_133662-mMC012054	1.44954	0.161798	0.642344	-0.0670613	-0.434552	0.0487065	0.00587854
18418	6	60	18	mMC014734	D430002O22Rik-No acc-mMC014734	1.4475	-0.4022	-0.00916747	0.522682	-0.190138	-0.976146	0.077231
2274	1	72	2	mMC006833	Gcgr-NM_8101-mMC006833	1.44721	0.929023	1.73478	0.0848736	0.377535	-0.0886211	0.000301928
14522	3	46	26	mMC024103	2010013I23Rik-No acc-mMC024103	1.44666	-0.216208	0.0514667	0.0858644	0.0354033	-0.244928	0.502017
13610	3	18	10	mMC021434	Pou2f3-NM_11139-mMC021434	1.44638	0.0844445	-0.549712	0.518313	0.166316	-0.368269	0.217891
9422	2	91	14	mMR028332	Ptk9-NM_8971-mMR028332	1.44563	0.351359	0.134034	0.141053	-0.29846	0.529892	0.0393732
10867	4	40	19	mMC013053	4930405G09Rik-No acc-mMC013053	1.44535	0.543123	0.440807	0.445468	-0.0597375	-0.11903	0.0738254
11733	4	67	21	mMC015454	Tbcc-NM_178385-mMC015454	1.44511	-0.291493	1.08779	0.254255	0.0141152	0.427373	0.0054055
18728	6	70	8	mMC016034	C130034I24Rik-No acc-mMC016034	1.44495	-0.278368	-0.195276	-0.300298	-0.524188	-0.328505	0.143951
18000	6	47	16	mMC013667	D6Wsu163e-NM_138594-mMC013667	1.44486	0.165476	0.372969	0.436989	0.170759	-0.289965	0.562148
2436	1	77	4	mMR027101	Sytl3-NM_31395-mMR027101	1.44485	1.12553	0.768634	0.224055	0.474796	0.563554	0.384746
9427	3	95	19	mMC009109	2210013K02Rik-NM_23712-mMC009109	1.44476	0.826204	-0.16616	0.248683	-0.212858	-0.668908	0.265637
1746	1	55	18	mMC005038	Abhd6-NM_25341-mMC005038	1.44457	0.0912443	-0.718522	-0.0720908	-0.172092	-0.198309	0.0360731
11799	4	69	23	mMC015991	Cited1-NM_7709-mMC015991	1.44421	0.653454	1.15372	-0.292973	0.0845343	1.11591	0.00392008
18497	6	63	1	mMC015249	Gcn5l2-NM_20004-mMC015249	1.44416	0.948877	0.68107	-0.703879	-0.386591	-0.601047	0.0027695
14324	5	40	20	mMC012885	4432404J10Rik-NM_25709-mMC012885	1.44353	1.30018	0.856511	-0.0407597	0.152116	-0.653667	0.000620008
9796	4	7	4	mMC009645	Scn1b-NM_11322-mMC009645	1.44291	0.738487	1.59658	-0.2427	0.180062	1.41651	0.00135884
6931	2	13	19	mMC020909	2010203O03Rik-No acc-mMC020909	1.44282	0.432276	0.408331	-1.08185	0.334781	-0.42372	0.0777862
18068	6	49	20	mMC013829	Galm-NM_176963-mMC013829	1.44242	0.22465	0.775847	0.315742	-0.14144	-0.499797	0.0649595
14938	5	59	26	mMC014895	Hist3h2ba-NM_30082-mMC014895	1.44146	0.395869	0.542007	-0.202444	-0.0843918	-0.297146	0.000184859
689	1	22	17	mMC002078	1700012A03Rik-NM_29587-mMC002078	1.44128	0.0121624	-2.60277	0.890385	0.549164	-1.22485	0.803563
15574	5	79	22	mMC016814	Inpp5d-NM_10566-mMC016814	1.44123	-0.0422662	-0.179164	-0.0112278	0.114479	-0.307311	0.0414044
11966	4	74	30	mMC016260	Slc38a1-NM_134086-mMC016260	1.44104	-0.0618245	0.662317	-0.0925674	0.136907	0.277376	0.0108981
4493	2	41	13	mMC004012	2210417D09Rik-NM_25620-mMC004012	1.44044	1.26987	-0.741077	0.630274	-0.0973165	-0.655968	0.901067
9517	3	98	13	mMC009580	Pcsk1n-NM_13892-mMC009580	1.44022	0.228934	0.702867	-0.0978436	0.2032	-0.234302	0.00150324
18160	6	52	16	mMC013963	Fxyd1-NM_19503-mMC013963	1.43977	0.0990917	0.916118	-0.259626	0.122786	-0.712044	0.000665251
16810	6	10	10	mMC010298	Olfr1346-NM_146916-mMC010298	1.43968	0.578179	0.961127	-0.130637	-0.215669	-0.408336	0.26125
6962	2	14	18	mMC020774	Wtip-NM_207212-mMC020774	1.43897	0.569973	1.77023	-1.09876	-0.0831884	-0.620777	0.0021163
3555	2	12	3	mMC001029	Apba2-NM_7461-mMC001029	1.43828	0.87097	1.05142	-0.26136	-0.412315	0.299346	0.000109655
18077	6	49	29	mMC013876	Il17rd-NM_134437-mMC013876	1.4376	-0.385373	0.689794	0.179304	0.280094	-0.681899	0.203285
19794	6	103	18	mMC019046	Gm2a-NM_10299-mMC019046	1.43732	1.82348	0.559682	-0.176767	0.454953	0.0839261	0.237577
11364	4	56	4	mMC014541	C030033F14Rik-No acc-mMC014541	1.43731	-0.450415	-0.453496	-0.484202	-0.160154	-0.0808751	0.43309
4459	2	40	11	mMC003739	Sall4-NM_175303-mMC003739	1.43702	0.194599	0.961156	-0.277171	0.0571716	-0.362137	0.00156514
14094	5	33	14	mMC012388	8430423G03Rik-XM_149714-mMC012388	1.437	0.328775	1.4154	-0.45568	0.162487	-0.213385	0.00306676
9780	2	102	20	mMR029197	C430041B13Rik-No acc-mMR029197	1.43668	-0.275976	0.273849	0.441076	-0.0122067	-0.365718	0.0734729
16376	3	104	24	mMR029327	BC027092-No acc-mMR029327	1.43586	1.34188	0.607321	0.462759	0.168547	-0.814311	0.00877534
1611	1	51	11	mMC004699	Pyp-NM_26438-mMC004699	1.43532	0.695661	0.13968	0.266476	-0.174935	0.48447	0.0134379
11230	4	51	30	mMC013868	Kif24-NM_145101-mMC013868	1.43493	0.353956	1.0039	-0.133026	-0.290869	0.13987	0.0185409
14728	5	53	8	mMC014306	4933404M02Rik-NM_25744-mMC014306	1.43483	0.634437	1.24714	-0.746313	0.30463	-0.642363	1.64599e-06
16678	6	6	6	mMC009913	Gng7-NM_10319-mMC009913	1.43455	-0.271023	-0.199067	0.0116943	-0.217531	-0.227716	0.8543
18385	6	59	17	mMC014846	8430422M09Rik-No acc-mMC014846	1.43416	-0.398529	-0.532519	-0.10737	0.303087	-0.465028	0.00917912
4266	2	34	10	mMC003106	Rlbp1-NM_20599-mMC003106	1.4335	-0.33109	0.367186	0.231374	-0.317894	-0.166406	0.698348
11349	4	55	21	mMC014302	Ticam2-NM_173394-mMC014302	1.43291	0.334138	1.32158	0.0388395	-0.0567551	0.438407	0.023754
17957	6	46	5	mMC013777	Amacr-NM_8537-mMC013777	1.43267	-1.09971	0.0523613	-0.493002	-0.0555771	0.256977	0.0441176
16832	6	10	32	mMC010280	D14Ertd226e-NM_145928-mMC010280	1.43229	-0.459747	-0.571795	-0.151091	0.0279641	-1.15491	0.0178945
3063	1	96	23	mMC009191	D030041N04Rik-NM_173012-mMC009191	1.43017	-0.0160571	-2.48178	0.182615	-0.274295	-0.215664	0.00168313
14945	5	60	1	mMC014873	2310007H09Rik-XM_486016-mMC014873	1.42814	0.59759	0.956171	0.243441	0.960576	-0.684501	0.0929687
18104	6	50	24	mMC014143	Ube2h-NM_9459-mMC014143	1.4281	0.594828	0.668877	0.796999	0.222936	-0.467573	0.11387
1724	1	54	28	mMC005128	Smad2-NM_10754-mMC005128	1.42783	0.505763	-1.58811	0.603626	-0.285723	-1.17276	0.603262
6301	2	97	29	mMC009364	Wnt3-NM_9521-mMC009364	1.42772	0.558321	1.30562	-0.464861	-0.166574	-0.330295	0.060737
2965	1	93	21	mMC009102	4930545K18Rik-No acc-mMC009102	1.42726	0.966518	1.36957	-0.889083	0.0809743	-0.949297	0.0298819
1911	1	60	23	mMC005735	Ethe1-NM_23154-mMC005735	1.42704	1.06066	1.06313	0.129554	-0.233781	-0.0810341	0.00295383
1690	1	53	26	mMC005191	9530066K23Rik-NM_172524-mMC005191	1.42698	0.590287	0.987685	-0.480832	-0.175754	-0.855185	0.0358538
1361	1	43	17	mMC003910	Edaradd-NM_133643-mMC003910	1.42679	0.856145	0.4293	0.590268	-0.0395445	-0.85511	0.215575
7355	2	26	27	mMC021952	1500031H01Rik-XM_358753-mMC021952	1.42628	0.867993	1.40718	-1.08044	0.173138	0.280623	0.00980355
12211	4	82	19	mMC017077	Bat4-NM_32460-mMC017077	1.42585	0.758835	0.695919	-0.0160583	0.262	0.554618	0.328882
18735	6	70	15	mMC016083	Ucp1-NM_9463-mMC016083	1.42568	-0.43777	-1.55468	0.301116	0.146559	-0.169738	0.176503
14610	5	49	18	mMC013950	Tas2r137-NM_21562-mMC013950	1.42548	0.382963	0.665912	0.263379	0.0523007	0.310997	0.760059
19213	6	85	13	mMC017356	Hrh3-NM_133849-mMC017356	1.4244	-0.117203	-0.202391	-0.0261244	0.00228397	-0.647539	0.0939476
1244	1	39	28	mMC003504	Syt8-NM_18802-mMC003504	1.42434	1.73821	-1.14696	0.494316	0.250341	-0.753216	0.106374
15785	3	86	9	mMR027986	Gcap15-No acc-mMR027986	1.4242	-0.186164	2.21799	-1.52943	0.00571288	-0.183777	8.1406e-05
17328	6	26	16	mMC011835	B230118H07Rik-NM_26592-mMC011835	1.42403	0.122459	0.193255	0.0942544	-0.415867	-1.06801	0.440888
14875	5	57	27	mMC014744	Slc25a14-NM_11398-mMC014744	1.42351	0.0592874	0.940322	0.317128	0.109952	0.0315991	0.0178368
9718	2	100	22	mMR029014	Ebf1-NM_7897-mMR029014	1.42331	-0.478034	1.00498	0.609884	-0.463964	-0.147599	0.290982
18059	6	49	11	mMC013899	Aipl1-NM_53245-mMC013899	1.41978	-0.0293705	0.301793	0.0493122	-0.319675	-0.16999	0.331944
15248	3	69	16	mMC026139	5830435C13Rik-No acc-mMC026139	1.41954	-0.387067	0.296699	0.328151	-0.176383	-0.452224	0.0896899
11419	4	57	27	mMC014840	5330430B06Rik-No acc-mMC014840	1.41888	0.0874208	1.01444	0.147492	0.0526791	0.328869	0.0847785
10535	4	30	7	mMC012082	2210402C17Rik-No acc-mMC012082	1.41836	-0.326005	0.0365731	0.0316967	-0.120814	-0.101045	0.00151576
16025	5	93	25	mMC018223	Clecsf9-NM_19948-mMC018223	1.41814	-2.38964	-0.46817	0.00413893	0.0264703	-0.50741	0.0109489
19786	6	103	10	mMC019042	Lrp12-NM_172814-mMC019042	1.4174	-0.419086	-0.365547	0.411038	0.155009	-0.104351	0.0224137
15353	5	72	25	mMC016031	Olfr1507-NM_20512-mMC016031	1.41725	0.997519	0.728422	-0.117727	0.24942	0.121642	0.00298646
15109	3	65	5	mMC025777	Pim2-NM_138606-mMC025777	1.41721	0.615983	1.37211	-1.48689	-0.246728	0.166518	0.00377013
14772	5	54	20	mMC014221	Ttc7-NM_28639-mMC014221	1.41642	0.279188	-0.448543	-0.451675	-0.228054	-0.201972	0.000421465
10231	4	20	23	mMC011111	E130102B10Rik-No acc-mMC011111	1.41561	-0.167689	1.45315	-0.205764	-0.741941	0.917858	0.234162
3811	2	20	3	mMC001797	AU018778-NM_144930-mMC001797	1.41557	0.687582	1.00198	0.1161	-0.302608	0.87449	0.126135
17286	6	25	6	mMC011545	Slc22a2-NM_13667-mMC011545	1.41538	0.699306	1.74013	-0.218838	-0.254048	0.704667	0.0335379
17639	6	36	7	mMC012474	Sympk-XM_485873-mMC012474	1.41484	1.57323	1.29722	-0.567384	-0.10694	-0.505893	0.0663264
4854	2	52	22	mMC004822	Fh1-NM_10209-mMC004822	1.41482	1.03692	-0.253153	0.149597	-0.0529962	-0.0234977	0.158442
6329	2	98	25	mMC009303	Plekhm2-XM_204109-mMC009303	1.41479	0.746515	0.0756889	-0.26192	-0.278743	-0.621918	0.00797494
7144	3	24	8	mMC002034	Centg3-NM_139153-mMC002034	1.41439	-0.403572	0.194667	-0.805939	-0.0642318	-1.59104	0.00646588
1022	1	32	30	mMC003020	1500031H01Rik-XM_358753-mMC003020	1.41379	0.605628	1.66462	0.0528003	-0.223145	-0.415607	0.000780356
1145	1	36	25	mMC003455	C8b-NM_133882-mMC003455	1.41307	0.513155	1.69618	0.403366	-0.276547	0.436371	0.487558
14004	3	30	20	mMC022565	BC010250-NM_178029-mMC022565	1.41305	0.960817	1.02593	-1.27969	0.0248321	-0.663096	0.00113566
12024	2	172	24	mMO035951	18S-rRNA_X00686-mMO035951	1.4128	0.4101	-0.00914439	-0.162514	-0.353057	-2.24082	0.217666
9170	3	87	18	mMC008294	4933402N03Rik-XM_133877-mMC008294	1.41228	0.480428	0.105483	-0.458138	-0.176924	-0.697622	0.00276558
17138	6	20	18	mMC010894	Slac2b-NM_176846-mMC010894	1.4114	0.15553	-1.29748	0.0500304	0.0253203	-0.494003	0.0361113
18589	6	65	29	mMC015412	Nbl1-NM_8675-mMC015412	1.41113	-0.234612	0.503873	-0.143233	0.250608	-0.824851	0.0206186
8011	2	47	11	mMC024179	3110040D16Rik-XM_126172-mMC024179	1.41093	0.513325	0.445044	-1.19502	-0.566955	0.388392	0.0210661
17298	6	25	18	mMC011550	Cyp24a1-NM_9996-mMC011550	1.41049	-0.266046	-1.10631	0.432969	0.151623	-0.60452	0.530424
11400	4	57	8	mMC014786	Pigo-NM_20035-mMC014786	1.40853	-0.205487	0.154544	0.72549	0.221206	0.418575	0.915923
17121	6	20	1	mMC010937	Sorcs2-NM_30889-mMC010937	1.40735	0.741004	2.40403	-0.733669	-0.0724266	0.736231	0.00158178
7571	3	37	19	mMC003533	Phka2-NM_172783-mMC003533	1.40721	-0.101803	-0.529555	-0.468463	0.515669	-1.15696	0.275556
13554	5	16	18	mMC010606	Rpl8-NM_12053-mMC010606	1.40693	0.296729	0.747085	0.133091	0.410603	-0.341824	0.150585
17404	6	28	28	mMC011664	F7-NM_10172-mMC011664	1.40668	0.443743	0.840825	-0.241943	-0.259408	-0.442441	0.0064469
16750	6	8	14	mMC009716	2310016A09Rik-NM_181588-mMC009716	1.40622	0.0182066	-0.0987424	-0.153991	0.439169	0.349291	0.221792
1813	1	57	21	mMC005646	Zdhhc14-NM_146073-mMC005646	1.40615	0.649967	0.750224	0.157039	-0.035638	-0.375985	0.0878602
7031	3	20	23	mMC001703	4933403O08Rik-XM_136029-mMC001703	1.40589	-0.720219	0.428515	-0.0241066	-0.65923	-0.75896	0.61019
8617	2	66	9	mMC025786	Rps6-NM_9096-mMC025786	1.4043	-0.0491632	1.21999	-0.222958	-0.882841	0.897008	0.0583408
13281	5	8	1	mMC009881	Abcb11-NM_21022-mMC009881	1.40353	0.380933	1.55316	-0.174128	-0.200729	-0.704434	0.0132101
3002	1	94	26	mMC008943	2610036D13Rik-NM_29282-mMC008943	1.40336	0.647401	1.22838	-0.636105	-0.154979	-0.239362	1.09762e-05
15383	5	73	23	mMC016279	Nt5c3-NM_26004-mMC016279	1.402	0.508847	0.556876	-0.378651	-0.331343	-0.216044	0.0199652
18991	6	78	15	mMC016851	Vps41-NM_172120-mMC016851	1.40106	0.0400264	0.00917653	-0.346373	0.612299	-0.380247	0.509929
7374	2	27	14	mMC022188	Crip1-NM_7763-mMC022188	1.40057	1.42904	0.989719	-0.416959	0.31454	-0.389149	0.0716541
16688	3	114	16	mMR030651	BC055368-NM_183017-mMR030651	1.39926	-0.459269	0.454529	0.486009	-0.232536	-0.402808	0.22025
14609	5	49	17	mMC013974	6820443O06Rik-NM_1005510-mMC013974	1.39877	0.521935	0.603084	-0.0618612	-0.0401384	0.54378	0.0561406
19003	6	78	27	mMC016856	BC021917-NM_145496-mMC016856	1.39783	-0.329302	-0.359195	0.0360934	0.04142	-0.512907	0.739806
7208	2	22	8	mMC021514	Cox7c-NM_7749-mMC021514	1.39766	1.07619	1.41846	-0.647464	-0.422163	0.00455965	0.000375211
14593	5	49	1	mMC013993	A430081F14Rik-No acc-mMC013993	1.39753	0.762732	1.20507	-0.22252	0.7439	-0.292112	0.0404098
18554	6	64	26	mMC015095	Clspn-NM_175554-mMC015095	1.39711	-0.376213	-0.0596503	0.191022	0.785097	-1.29962	0.33254
8972	3	81	12	mMC007683	F10-NM_7972-mMC007683	1.39708	0.806823	0.835274	-0.315549	-0.1557	0.854838	0.00324787
15905	5	90	1	mMC017745	6430567E01Rik-No acc-mMC017745	1.39667	0.0314442	-0.504416	-0.132851	-0.34702	0.132607	0.708292
8650	2	67	10	mMC026050	Faah-NM_10173-mMC026050	1.39652	0.36641	1.47255	-0.423056	-0.158314	-0.412537	0.00684405
1362	1	43	18	mMC003886	4933426M11Rik-NM_178682-mMC003886	1.39648	0.219098	0.745472	0.421059	-0.274816	-0.0841574	0.554892
16712	6	7	8	mMC009802	Hdac5-NM_10412-mMC009802	1.39555	0.934286	1.12541	-0.538456	0.0330228	-0.337358	0.0801565
14133	5	34	21	mMC012374	Ppfibp2-NM_8905-mMC012374	1.39534	0.817436	0.786522	-0.730395	0.147841	0.196776	0.0373432
17985	6	47	1	mMC013713	Rhoc-NM_7484-mMC013713	1.39525	0.30454	0.277306	0.0487123	0.102121	-0.637623	0.0161962
13988	5	30	4	mMC011941	Mbd3l1-NM_28557-mMC011941	1.39516	0.635817	-0.0542757	-0.556968	-0.14951	-0.0433388	0.216992
1904	1	60	16	mMC005707	Des-NM_10043-mMC005707	1.3946	1.08592	1.14926	-0.563426	-0.285555	0.41935	0.00827519
8076	2	49	12	mMC024291	Cope-NM_21538-mMC024291	1.39398	1.46666	0.310758	-0.58097	-0.04845	-0.154344	0.00920881
14841	5	56	25	mMC014495	Gstt1-NM_8185-mMC014495	1.39316	1.66971	0.115757	-0.227752	0.0135488	-0.0139231	0.00248181
15222	5	68	22	mMC015574	Gtpbp1-NM_13818-mMC015574	1.39215	0.779011	0.90483	-0.953236	-0.065076	0.293374	0.00226209
10568	4	31	8	mMC011922	Odf4-NM_145746-mMC011922	1.39201	-0.017447	1.06739	0.238246	0.201596	0.15602	0.334412
11908	2	169	4	mMO035837	scl0000r-REVCOMP-mMO035837	1.39167	0.971364	0.636049	-0.565877	-0.146923	-0.374372	0.00647476
18190	6	53	14	mMC014212	Mrps35-NM_145573-mMC014212	1.39108	0.331587	0.0701079	-0.101565	0.335593	-0.749324	0.139354
17562	6	33	26	mMC012295	BC004012-NM_138671-mMC012295	1.39011	-0.141725	-0.648644	-0.279013	0.067605	-0.794246	0.269154
9587	3	100	19	mMC009405	Olfr211-NM_146912-mMC009405	1.38967	-0.513191	0.286793	-0.539863	0.116263	-0.515847	0.0450572
7047	2	17	7	mMC021290	Aldoa-NM_7438-mMC021290	1.38939	0.660503	1.47862	-1.46286	-0.265439	-0.353347	0.00541716
8766	3	74	30	mMC007228	BC025600-NM_146162-mMC007228	1.38934	-0.72719	1.51951	0.603781	-0.283793	-0.780176	0.0031637
3799	1	119	23	mMR030791	2610034E13Rik-NM_29365-mMR030791	1.38913	0.645123	0.22449	-0.613043	-0.0485584	-0.0428592	0.00350577
18789	6	72	5	mMC015905	E130105L11Rik-No acc-mMC015905	1.3891	0.212997	0.118582	-0.0302379	0.765041	-0.364981	0.170672
7821	2	41	13	mMC023596	Oas1a-NM_145211-mMC023596	1.38888	0.695274	1.08546	-0.892576	-0.117159	-0.648593	0.0110664
3921	2	23	17	mMC002270	C430010C01-No acc-mMC002270	1.38869	0.245914	-0.994303	0.180592	-0.141116	-0.597439	0.320654
9916	2	106	28	mMR029608	Cnnm2-NM_33569-mMR029608	1.38789	-0.0266723	0.625005	0.438171	-0.089925	-0.720493	0.22459
15750	5	85	6	mMC017401	C230094B09Rik-No acc-mMC017401	1.38706	-0.108004	-1.31365	-0.021185	-0.173948	0.384603	0.0101271
7187	2	21	19	mMC021677	Uck1-NM_11675-mMC021677	1.38684	-0.159461	-0.929647	-0.653996	-0.258476	-0.804585	0.108451
14996	5	61	20	mMC015077	C630013N10Rik-NM_172052-mMC015077	1.38632	1.55912	0.27286	0.0589164	0.238425	-0.590602	5.38727e-05
4084	2	28	20	mMC002517	2810012L14Rik-NM_29581-mMC002517	1.38589	0.572123	0.703719	-0.0467645	-0.137721	-0.698843	0.142139
877	1	28	13	mMC022268	Rpl10-NM_52835-mMC022268	1.38578	0.949681	0.946687	-0.705692	0.436793	0.182541	0.319158
14663	5	51	7	mMC014194	A230106N23-NM_177838-mMC014194	1.38519	0.890543	1.35634	-0.437843	0.192389	-0.484442	3.37315e-05
1794	1	57	2	mMC025153	Galr3-NM_15738-mMC025153	1.3851	-0.000261722	0.607956	-0.987287	-0.396743	1.27238	0.00284025
6380	2	100	12	mMC009427	2210008F06Rik-No acc-mMC009427	1.38463	0.342018	0.747056	-0.551694	-0.233075	-0.349659	0.00299177
3726	2	17	14	mMC001636	Endogl1-NM_172456-mMC001636	1.3839	2.11168	0.330685	0.748984	0.0909754	-0.188465	0.702783
17595	6	34	27	mMC012632	Smn1-NM_11420-mMC012632	1.38366	-0.120274	0.484664	-0.0566108	0.270094	-0.70255	0.00754893
214	1	7	22	mMC019990	Atp8a2-NM_15803-mMC019990	1.38312	0.895351	1.35014	-1.47251	0.0600453	0.0157688	0.0676602
6015	2	88	31	mMC008352	Chaf1b-NM_28083-mMC008352	1.3831	1.27928	0.428606	-0.179516	0.109796	-0.676198	0.564975
9057	3	84	1	mMC007865	Hebp2-NM_19487-mMC007865	1.3827	1.01301	0.566932	-0.209195	-0.238217	-0.656392	0.408624
18906	6	75	26	mMC016335	C130075A20Rik-No acc-mMC016335	1.38189	0.96194	-0.0973599	-1.00991	0.753205	-1.78635	0.0808284
10878	4	40	30	mMC013004	C2ta-NM_7575-mMC013004	1.38154	0.226361	0.378484	0.0376238	-0.0640898	0.00364309	0.00829896
5807	2	82	15	mMC007739	4930519N13Rik-NM_207204-mMC007739	1.38143	0.575105	0.944838	-0.500103	0.116685	-0.866998	0.0222004
7436	2	29	12	mMC022371	Rfc5-XM_132348-mMC022371	1.3812	0.640093	2.00976	-0.455767	-0.160585	-0.649142	0.0118165
9591	3	100	23	mMC009383	Wdr22-NM_177267-mMC009383	1.38099	0.379342	0.371045	-0.0685556	-0.307397	-0.775159	0.00292346
13279	5	7	31	mMC009976	D930023I05Rik-No acc-mMC009976	1.38061	0.858559	1.17686	-0.67069	0.0634225	0.281537	0.0489837
14855	5	57	7	mMC014762	Dusp15-NM_145744-mMC014762	1.38037	0.605464	1.75617	-0.411848	-0.133021	-0.146334	0.00159146
2675	1	84	19	mMC008061	AK122498-XM_143575-mMC008061	1.37997	0.666378	-0.676478	0.217995	-0.190562	-0.259344	0.454826
8848	3	77	16	mMC007323	Mrpl15-NM_25300-mMC007323	1.37993	-0.356274	0.387298	-0.385519	-0.0211284	-0.52041	0.259018
5515	2	73	11	mMC007083	Serpina6-NM_7618-mMC007083	1.37953	1.21346	-1.51934	-0.865304	-0.0127557	-0.28734	0.0780535
6124	2	92	12	mMC008659	Nrgn-NM_22029-mMC008659	1.3793	0.733444	-0.34366	-0.139427	-0.00783593	0.0635792	0.087179
5558	2	74	22	mMC006926	Chdc1-XM_484393-mMC006926	1.37872	0.886083	1.4193	-1.0361	-0.0493345	1.05552	0.125741
18131	6	51	19	mMC014101	Podxl-NM_13723-mMC014101	1.3782	-0.223818	0.737879	0.559645	-0.185368	-0.414228	0.0710489
19274	6	87	10	mMC017506	Ly6h-NM_11837-mMC017506	1.37699	0.145798	-0.199883	0.213949	0.328396	-1.30561	0.0432213
8697	3	72	25	mMC006719	1110046J04Rik-No acc-mMC006719	1.37689	-0.318292	-0.639895	0.0671176	0.0347206	-0.987365	0.254242
4130	2	30	2	mMC002697	Mdm2-NM_10786-mMC002697	1.37635	0.011299	-0.28894	0.13892	-0.11808	0.058463	0.379576
18725	6	70	5	mMC016081	Hspa12a-NM_175199-mMC016081	1.37555	-0.0412933	0.565682	0.0487686	0.929994	-0.175747	0.354353
348	1	11	28	mMC020400	C230066K19Rik-No acc-mMC020400	1.37372	0.155133	1.16014	-1.09268	-0.0173955	-0.535143	0.163418
12001	4	76	1	mMC016505	Hoxc9-NM_8272-mMC016505	1.37337	-0.607101	0.891184	0.245165	-0.382528	0.117251	0.000797581
18056	6	49	8	mMC013826	Nfs1-NM_10911-mMC013826	1.3731	-0.0625322	0.460674	-0.175116	0.169397	-1.00531	0.000984355
1230	1	39	14	mMC003476	2010009L17Rik-NM_25630-mMC003476	1.37228	0.462502	0.168212	0.49157	-0.0541346	-0.14704	0.502606
7493	3	35	5	mMC003321	Ssr4-NM_9279-mMC003321	1.3721	-1.22586	0.796402	-0.330374	-0.169968	0.0949392	0.017022
12288	4	84	32	mMC017208	Ppp1r11-NM_29632-mMC017208	1.37135	0.0760413	0.751749	0.105186	0.274976	0.267257	0.0117647
2509	1	79	13	mMC007388	Klf7-NM_33563-mMC007388	1.37123	-0.226729	0.544527	0.514368	-0.442034	0.213494	0.32481
13548	5	16	12	mMC010579	Ddx27-NM_153065-mMC010579	1.37016	0.629311	0.405196	-0.146611	-0.147041	-0.117971	0.143534
12557	4	93	13	mMC018316	Ostm1-NM_172416-mMC018316	1.37002	-0.118605	-0.109841	0.239259	0.084195	-0.0597537	0.724637
12060	2	173	28	mMO036224	IGHA-J00475-mMO036224	1.3699	0.561418	1.23106	0.198261	-0.363429	0.366694	0.00094042
5233	2	64	17	mMC006022	Fmo5-NM_10232-mMC006022	1.36968	0.449555	-1.06312	0.251139	0.0103928	-0.0939252	0.00505144
15276	5	70	12	mMC015755	Rrbp1-NM_24281-mMC015755	1.369	0.935798	1.14237	-0.397534	0.368462	-0.0318027	0.00659449
4162	2	31	2	mMC002985	Faf1-NM_7983-mMC002985	1.36878	-0.185871	-0.33387	0.224411	-0.472385	0.265014	0.162325
12346	4	86	26	mMC017391	Ss18l1-NM_178750-mMC017391	1.36837	-0.0527361	0.00348361	0.368376	0.145018	-0.242699	0.00180294
1893	1	60	5	mMC005729	Bucs1-NM_54094-mMC005729	1.36811	0.567445	0.63455	0.297465	0.170436	0.439271	0.909859
8830	2	72	30	mMR026348	Syt1-NM_9306-mMR026348	1.36764	0.322649	0.546238	0.0235752	-0.034366	-0.13833	0.165126
15078	3	64	6	mMC025481	Tubb3-NM_23279-mMC025481	1.36749	0.584603	1.55455	-0.700439	-0.116377	-0.344148	3.39824e-05
5681	2	78	17	mMC007358	Grik1-NM_146072-mMC007358	1.36639	-0.119983	0.431373	0.145971	-0.436212	0.96025	0.0227942
13126	3	3	6	mMC019809	Dusp14-NM_19819-mMC019809	1.36636	-0.18159	2.8788	-0.920422	-0.174277	-0.160023	5.10146e-05
13691	5	20	27	mMC011016	9630050M13Rik-XM_194000-mMC011016	1.36629	0.658039	0.931712	-0.735534	0.0108643	-0.244264	0.0362156
9073	3	84	17	mMC007846	Bri3-NM_18772-mMC007846	1.36616	0.488444	-0.148284	0.346718	0.136373	-0.521728	0.0734068
15251	5	69	19	mMC015917	4930505A04Rik-XM_126074-mMC015917	1.3661	0.0594067	0.374074	-0.144343	0.653211	-0.519935	0.0138493
17016	6	16	24	mMC010511	A530065E19Rik-NM_145433-mMC010511	1.36582	0.401183	1.12415	-0.158892	-0.287716	-0.658901	0.11907
18602	6	66	10	mMC015674	4930455D15Rik-No acc-mMC015674	1.36566	0.513673	-0.0796327	0.254564	-0.146224	-1.42838	0.135835
14792	5	55	8	mMC014506	E130306D19Rik-XM_131404-mMC014506	1.36546	0.00215078	0.236992	0.135667	0.179379	-0.505337	0.0722161
11407	4	57	15	mMC014835	5730578N08Rik-NM_25693-mMC014835	1.36483	0.102636	2.36712	0.470745	-0.193915	0.0867735	0.00136803
17222	6	23	6	mMC011361	Gnefr-NM_13789-mMC011361	1.36442	0.525794	-0.643527	0.162184	0.121615	-1.04283	0.52607
11801	4	69	25	mMC016015	Mcam-NM_23061-mMC016015	1.36431	0.190737	0.929083	-0.148054	0.249076	-0.0123842	0.00962416
17634	6	36	2	mMC012401	Fundc1-NM_28058-mMC012401	1.3639	-0.530765	0.662354	0.0612361	-0.358934	0.218943	0.153694
11762	4	68	18	mMC015694	6530411M01Rik-No acc-mMC015694	1.36247	-0.0813244	0.856926	0.192275	0.406046	-0.176796	0.0806416
7188	2	21	20	mMC021605	Crygd-NM_7776-mMC021605	1.36215	-0.119013	0.0219764	0.188536	-0.234372	-0.161924	0.193565
17289	6	25	9	mMC011570	3110006E14Rik-XM_127466-mMC011570	1.36195	0.491149	0.891724	0.0225286	-0.0851528	-0.40551	0.197627
18759	6	71	7	mMC016018	5730557B15Rik-NM_26153-mMC016018	1.36162	-0.02351	0.0482481	-0.0240389	-0.0606993	-0.92819	0.223624
571	1	18	27	mMC001696	A930019D19Rik-No acc-mMC001696	1.36062	-0.0255458	-0.30798	0.400369	-0.207523	-1.10244	0.900457
14444	5	44	12	mMC013267	Lynx1-NM_11838-mMC013267	1.35968	0.355368	-0.316638	-0.109648	0.0349407	-0.244085	0.0402366
6311	2	98	7	mMC009298	Il27-NM_145636-mMC009298	1.35939	1.04789	1.40418	-1.19971	-0.105691	-0.915666	3.53691e-06
19254	6	86	22	mMC017574	Hmgb2l1-NM_178017-mMC017574	1.3591	-0.392399	-0.434994	0.566366	0.0372503	-0.585808	0.380576
14268	5	38	28	mMC012712	4733401L19Rik-XM_203344-mMC012712	1.35906	-0.0348644	-0.538032	0.076161	0.285982	-0.550116	0.306496
9333	3	92	21	mMC008638	7030401O21Rik-NM_198035-mMC008638	1.35882	0.0882688	0.408298	0.432985	-0.0174191	-0.500894	0.141273
7799	2	40	23	mMC023303	Krtap5-1-NM_15808-mMC023303	1.35878	0.556184	1.34641	-1.1268	-0.203908	-0.251551	0.00394414
758	1	24	22	mMC002230	Hdac11-NM_144919-mMC002230	1.35863	0.503568	0.541505	0.418473	-0.0126676	-0.733686	0.0630718
19891	6	106	19	mMC019565	BC061237-NM_198677-mMC019565	1.35836	0.464293	-0.291759	1.28076	0.158824	0.321056	0.500262
6177	2	94	1	mMC008913	Cdk6-NM_9873-mMC008913	1.35802	0.598341	1.07385	-0.109218	-0.256172	0.772418	0.0155638
7891	3	47	19	mMC004501	Bcl2l12-NM_29410-mMC004501	1.35729	-0.257707	-0.058271	0.42206	0.0157633	-0.703813	0.701022
11700	4	66	20	mMC015469	2210404D11Rik-NM_178397-mMC015469	1.35716	-0.221546	0.729232	-0.052135	0.302308	-0.0792601	0.255917
15044	5	63	4	mMC015301	A830055N07Rik-No acc-mMC015301	1.35599	1.07259	1.0953	-0.212242	0.25028	0.612421	0.00256791
13367	5	10	23	mMC010047	Slc35b3-NM_134060-mMC010047	1.35537	0.361129	-0.120041	-0.670296	-0.0564565	-0.424226	0.0115155
1178	1	37	26	mMC003655	AA517853-NM_153799-mMC003655	1.35483	0.503711	0.967857	0.343767	-0.173844	-0.312113	0.244211
1375	1	43	31	mMC003936	C130070B15Rik-NM_177286-mMC003936	1.35414	0.860295	0.329338	-0.0123867	-0.266724	-0.00831438	0.00888998
6961	2	14	17	mMC020798	Fdps-NM_134469-mMC020798	1.35332	0.941712	1.70689	-1.17792	-0.211243	-0.142652	0.0066056
7687	2	37	7	mMC023210	Adrbk2-NM_177078-mMC023210	1.35314	0.183508	0.933871	-0.882276	-0.286	-0.47963	0.00145403
11735	4	67	23	mMC015431	Kif12-NM_10616-mMC015431	1.35311	0.700342	0.91631	-0.244044	0.504316	0.31299	0.0656275
8464	2	61	16	mMC025467	D630041G03Rik-No acc-mMC025467	1.35306	-0.491632	1.13849	0.177679	-0.345937	0.567502	0.000418924
3186	1	100	18	mMC009550	2010001A14Rik-No acc-mMC009550	1.35255	0.00465132	-0.493411	0.0326266	-0.100586	-0.21654	0.965806
14753	3	54	1	mMC024937	Wwox-NM_19573-mMC024937	1.35254	0.54332	0.286959	-0.735655	-0.246304	-0.195702	0.0199058
1759	1	55	31	mMC024672	Serpinc1-NM_80844-mMC024672	1.35219	0.0844241	2.30575	-1.02631	-0.639523	2.23148	0.0237352
15949	5	91	13	mMC018036	BC024322-NM_173748-mMC018036	1.35214	-1.27909	-0.288728	-0.00294711	-0.382835	0.414332	0.199174
6241	2	96	1	mMC009113	Trip10-NM_134125-mMC009113	1.35188	0.201517	0.203987	-0.423201	-0.117094	-0.755767	0.0429672
7913	2	44	9	mMC023682	Irx4-NM_18885-mMC023682	1.35151	-0.0943807	0.546027	-0.385258	-0.160812	0.595493	0.0883422
13235	5	6	19	mMC009685	Srp68-NM_146032-mMC009685	1.35121	0.431522	0.237625	-0.212382	-0.0285632	-0.195617	0.0647342
12182	4	81	22	mMC017094	Fnbp4-NM_18828-mMC017094	1.35084	-0.158005	0.419007	0.244246	-0.124692	0.0267095	0.377435
10843	4	39	27	mMC012744	Ndufb10-XM_128594-mMC012744	1.35061	0.750902	0.869661	-0.33792	0.23713	-0.132042	0.00360365
17457	6	30	17	mMC012246	Bmper-NM_28472-mMC012246	1.35009	-0.613925	0.492601	-0.257709	-0.257089	-0.186094	0.0115946
2955	1	93	11	mMC009099	Igh-V15-XM_487237-mMC009099	1.34997	-0.227119	-0.164502	0.411217	-0.151076	-0.160154	0.0123713
15328	5	71	32	mMC016048	Efnb1-NM_10110-mMC016048	1.34989	0.360003	-0.416753	-0.440033	-0.526074	-0.649285	0.0510886
8895	3	78	31	mMC007664	9430088N01Rik-No acc-mMC007664	1.34967	0.230122	-0.582819	0.448165	0.0371375	-0.400114	0.711525
5158	2	62	6	mMC005793	Itih2-NM_10582-mMC005793	1.34964	0.975589	0.535801	-0.172083	-0.253532	0.954939	0.00885588
11172	4	50	4	mMC013957	Cblb-XM_358863-mMC013957	1.34909	0.178382	2.05936	-0.409252	0.454785	-0.0635887	0.279279
11893	4	72	21	mMC016126	Khdrbs2-NM_133235-mMC016126	1.349	-2.44787	-0.505015	-0.307439	-0.310067	0.984168	1.02552e-05
2991	1	94	15	mMC008987	9430091N11Rik-No acc-mMC008987	1.34894	0.468218	0.808252	-0.28076	-0.336774	-0.253291	0.00842428
13948	5	28	28	mMC011760	0610006O14Rik-NM_133764-mMC011760	1.34893	0.974205	1.19401	-0.600578	0.0795042	-0.146753	0.0143171
2169	1	68	25	mMC026111	Rpl21-NM_19647-mMC026111	1.3485	0.775074	1.08494	-0.546439	-0.837244	0.829314	0.048761
10866	4	40	18	mMC013006	2810408A11Rik-NM_27419-mMC013006	1.34811	1.06899	1.38148	0.321033	-0.0934131	-0.109468	0.213582
10738	4	36	18	mMC012622	Scamp1-XM_484305-mMC012622	1.34806	-0.299495	0.903167	0.221952	-0.274024	-0.0119042	0.00915995
13497	5	14	25	mMC010455	2410001E19Rik-XM_134644-mMC010455	1.34733	1.26607	0.752523	-0.650585	-0.0864567	-0.371222	0.000772517
12214	4	82	22	mMC017006	4930441N18Rik-No acc-mMC017006	1.34728	0.991893	1.30439	-0.19142	0.734762	0.67347	0.0494294
8583	3	69	7	mMC006602	1700018O18Rik-XM_131683-mMC006602	1.34657	-0.439357	-2.02167	0.0561647	0.210581	-0.9518	0.00157315
4644	2	46	4	mMC004261	5430413K10Rik-NM_175167-mMC004261	1.34533	0.0173948	-0.387915	0.278628	0.0136002	0.101582	0.208185
4287	2	34	31	mMC003160	4930442M18Rik-No acc-mMC003160	1.3444	-0.18065	-0.654963	-0.169528	-0.273554	0.173623	0.491161
18074	6	49	26	mMC013831	Taf5l-NM_133966-mMC013831	1.34432	-0.23263	0.351787	0.118488	-0.193336	-0.236479	0.369924
2189	1	69	13	mMC006796	A730055L17Rik-NM_177219-mMC006796	1.34428	0.0207124	0.978874	0.322284	-0.188285	0.407772	0.355685
10705	4	35	17	mMC012358	Eppk1-NM_144848-mMC012358	1.34419	-0.14875	1.04858	0.623421	-0.155483	0.213916	0.0222307
17916	6	44	28	mMC013200	2310043M15Rik-No acc-mMC013200	1.34415	-0.560494	-0.363591	0.369258	0.0713962	-0.694506	0.0182049
14832	5	56	16	mMC014443	Cdc25c-NM_9860-mMC014443	1.34356	0.565618	-0.359954	-0.288357	0.442613	-0.196957	0.472795
14693	5	52	5	mMC014081	A430072C10Rik-NM_176967-mMC014081	1.34319	0.810502	1.56608	-0.703525	-0.586064	0.617745	0.000672441
4513	2	42	1	mMC003921	Ky-NM_24291-mMC003921	1.34312	0.277312	0.717642	0.82677	-0.301236	-0.114911	0.904903
13989	5	30	5	mMC011961	Stk25-NM_21537-mMC011961	1.34161	2.18896	0.9842	-1.01589	0.770746	-0.81089	0.00306345
5496	2	72	24	mMC006767	1110025G12Rik-NM_29844-mMC006767	1.3416	0.520683	0.256484	0.0677056	0.142909	-1.05128	0.0924581
17260	6	24	12	mMC011251	Strn-NM_11500-mMC011251	1.34038	-0.249878	0.373261	-0.345145	-0.0618078	-0.742964	0.0304872
15269	5	70	5	mMC015801	Casp9-NM_15733-mMC015801	1.33948	-0.0661886	0.0520368	-0.354132	-0.0115508	0.445491	0.154994
9579	3	100	11	mMC009403	2610528K11Rik-NM_175184-mMC009403	1.33912	-0.920796	-0.0932545	-0.328092	0.284579	-0.170031	0.703694
9317	3	92	5	mMC008609	A930037G23Rik-NM_178787-mMC008609	1.33907	1.60024	0.893101	-0.326543	-0.0496601	-0.686178	0.242872
8808	3	76	8	mMC007026	3230401I01Rik-NM_26140-mMC007026	1.33867	-0.0935692	-0.102195	0.59534	-0.12415	-0.226789	0.974414
7810	2	41	2	mMC023521	Cyp4f14-NM_22434-mMC023521	1.33853	0.785397	0.714863	-0.818496	-0.341874	0.567775	0.00299448
11264	4	52	32	mMC014136	Tlx3-NM_19916-mMC014136	1.33793	0.957915	1.61339	-0.82653	-0.15652	0.623956	0.0076428
12985	4	106	25	mMC019383	5430437A18Rik-No acc-mMC019383	1.33726	0.252251	-0.0908696	-0.126924	-0.233451	1.03579	0.0237696
3149	1	99	13	mMC009308	4930503L19Rik-NM_172967-mMC009308	1.33716	-0.131431	-2.78948	0.196456	-0.241497	-0.0194995	5.38583e-06
3683	2	16	3	mMR001413	C730036D15Rik-NM_145368-mMR001413	1.33623	0.141715	0.0915791	-0.0353836	-0.1041	0.038885	0.0486802
14838	5	56	22	mMC014422	Psma6-NM_11968-mMC014422	1.3361	0.136668	-0.185015	0.0571897	-0.216927	0.280502	0.00543276
13612	5	18	12	mMC010763	Hibadh-NM_145567-mMC010763	1.33524	0.513512	0.414759	-0.152131	-0.237541	1.39883	0.0132966
11766	4	68	22	mMC015670	1110001A05Rik-NM_19808-mMC015670	1.33441	-0.0312347	-0.227155	-0.208751	0.16418	-0.154064	0.118932
19150	6	83	14	mMC017100	2310061A09Rik-No acc-mMC017100	1.33426	0.116909	-0.45587	-0.230614	0.130331	-1.0292	0.683645
7558	2	33	6	mMC022777	Nfix-NM_10906-mMC022777	1.33407	0.0638052	1.31864	-1.00397	-0.190455	-0.589863	0.0396516
14332	3	40	28	mMC023184	LOC223672-XM_128064-mMC023184	1.33366	0.707924	-0.563421	-0.58165	-0.100999	0.234165	0.00575655
17722	6	38	26	mMC012967	Pcdhb10-NM_53135-mMC012967	1.3332	-0.0771307	0.74034	-0.0398765	-0.0298939	-1.24729	0.131947
9447	3	96	7	mMC009018	Rab11fip4-NM_175543-mMC009018	1.33281	0.647445	1.14019	0.135903	-0.0927354	-0.723327	0.369168
13269	5	7	21	mMC009974	Ralgds-NM_9058-mMC009974	1.3316	0.151952	0.598212	-0.34809	-0.0819457	-0.247363	0.000127157
1469	1	46	29	mMC004380	Iqcc-NM_198026-mMC004380	1.3314	-0.247817	-3.34028	0.107976	-0.653276	0.0899619	0.0866599
918	1	29	22	mMC022470	Dctn2-NM_27151-mMC022470	1.33105	0.900644	1.9488	-0.80435	-0.529597	0.164885	0.014962
14091	5	33	11	mMC012459	Prkaca-NM_8854-mMC012459	1.33057	0.177547	-0.619744	-0.845403	-0.193423	-0.0445634	0.0822594
7728	3	42	16	mMC004155	Kcna7-NM_10596-mMC004155	1.33036	-0.41434	-0.636093	0.221566	-0.328834	-0.544759	0.693427
1823	1	57	31	mMC025232	Hspa8-NM_31165-mMC025232	1.32919	-0.551212	1.46772	-0.961207	-1.2755	0.921163	0.056032
10120	4	17	8	mMC010946	Rpp21-NM_26308-mMC010946	1.32907	0.157784	1.09752	0.220811	-0.0989773	0.8873	0.230637
17244	6	23	28	mMC011368	1300017K07Rik-NM_27919-mMC011368	1.32906	-0.465004	-1.46404	0.0396217	0.0567201	-0.991083	0.216489
13215	5	5	31	mMC009776	Asb12-NM_80858-mMC009776	1.32905	0.648723	1.173	-0.319626	-0.500175	0.347104	0.0973356
8620	3	70	12	mMC006819	Rhoj-NM_23275-mMC006819	1.32882	-0.697779	0.46997	0.0315302	-0.331149	-0.766173	0.767113
14337	5	41	1	mMC013225	2310043J07Rik-XM_485688-mMC013225	1.32867	0.472067	0.853283	-0.695464	-0.0998888	-0.434174	0.000571659
9947	4	11	27	mMC010056	E130303B06Rik-NM_198299-mMC010056	1.3282	0.550452	1.53552	-1.08958	-0.0620342	-0.0361105	0.00153391
14770	5	54	18	mMC014246	Psap-NM_11179-mMC014246	1.32803	0.515296	1.71353	-0.128279	-0.241183	0.0292371	0.00321231
1402	1	44	26	mMC004151	2310050C09Rik-XM_485268-mMC004151	1.3264	0.855004	0.691407	-0.0896346	-0.0172076	-0.300254	0.134032
8225	2	54	1	mMC024657	Rnf111-NM_33604-mMC024657	1.32621	0.486565	1.06597	-1.02958	-0.303738	-0.147283	0.00806808
11517	4	60	29	mMC014948	4930525C09Rik-No acc-mMC014948	1.32608	0.593441	1.28589	-0.329783	-0.083077	-0.327869	0.00230371
11919	4	73	15	mMC016371	Aldoc-XM_126120-mMC016371	1.32564	-0.0156533	1.31983	0.0395574	0.0604836	0.217315	0.409571
5867	2	84	11	mMC007963	Epha6-NM_7938-mMC007963	1.32481	0.857242	-0.928634	-0.948917	-0.305446	-0.693014	0.014987
11896	4	72	24	mMC016079	Proc-NM_8934-mMC016079	1.32473	0.297224	0.369636	-0.0978816	0.395766	0.902195	0.019231
13600	3	17	32	mMC021128	Ilk-NM_10562-mMC021128	1.32466	0.160645	-0.397021	0.451017	-0.0105838	-0.30029	0.277915
15819	5	87	11	mMC017651	Olfr448-NM_146273-mMC017651	1.32462	-0.27002	-0.0469592	-0.125386	-0.0559299	0.389608	0.0133734
12164	4	81	4	mMC017117	Vps24-NM_25783-mMC017117	1.32433	0.436517	0.776574	0.105478	0.825322	0.425068	0.32934
1842	1	58	18	mMC005510	Wfikkn1-XM_128578-mMC005510	1.32332	0.933275	-0.300977	-0.362149	0.208478	-1.47139	0.0315631
17427	6	29	19	mMC011981	Ccnd2-NM_9829-mMC011981	1.32314	-0.290341	0.764278	-0.128373	-0.32349	-0.46156	0.245219
18449	6	61	17	mMC015030	5830445D09Rik-No acc-mMC015030	1.32224	0.525864	0.118217	0.378549	0.333461	-1.18251	0.26763
11662	4	65	14	mMC015556	Ubap2-NM_26872-mMC015556	1.32166	0.330078	1.25236	0.317023	-0.086358	0.540958	0.0310952
12095	2	174	31	mMO036184	IGHV2S4-U53526-mMO036184	1.32165	1.06963	0.429514	0.184193	-0.22124	-1.02838	0.123773
13452	5	13	12	mMC010467	1700010H22Rik-NM_29312-mMC010467	1.32144	-0.513075	0.188465	-0.630155	-0.131263	-0.504165	0.0512733
7949	2	45	13	mMC023980	5730427M17Rik-XM_488530-mMC023980	1.32119	0.248519	1.15257	-0.651324	-0.313694	-0.263422	0.191235
15357	5	72	29	mMC016004	Iqcd-NM_29408-mMC016004	1.32044	0.940119	1.07973	-1.13352	0.284351	-0.328695	0.00268529
15659	5	82	11	mMC016979	Trim39-NM_24468-mMC016979	1.32012	-0.0825404	0.108269	-0.0669029	0.0226468	-0.365295	0.388915
9755	4	5	27	mMC009848	4933425H06Rik-No acc-mMC009848	1.31949	0.561007	0.575314	-0.867341	0.080336	-0.378311	0.0195803
17431	6	29	23	mMC011959	C1ql1-NM_11795-mMC011959	1.31917	0.539712	0.670278	-0.124068	-0.537031	-0.555109	0.167741
14601	5	49	9	mMC013970	Bmp8b-NM_7559-mMC013970	1.31914	0.852569	1.11653	-0.13472	0.270113	-0.161946	0.0279873
11910	4	73	6	mMC016345	Olfr554-NM_146325-mMC016345	1.31858	-0.0923838	1.08287	0.229305	-0.271172	0.205423	0.0923796
16955	6	14	27	mMC010712	Grin2c-NM_10350-mMC010712	1.3183	0.697353	0.168918	1.14047	0.488048	-1.11849	0.249418
7966	2	45	30	mMC023932	Ndufb9-NM_23172-mMC023932	1.31611	0.290669	0.889556	0.251665	-0.229236	-0.259269	0.0121294
17849	6	42	25	mMC013423	Ecm1-NM_7899-mMC013423	1.31605	0.246052	0.242293	-0.00439202	-0.208708	-0.0721498	0.452337
7643	2	35	27	mMC023008	Ap1b1-NM_7454-mMC023008	1.31601	-0.259988	0.302215	0.0958388	-0.313645	-0.182056	0.183286
17476	6	31	4	mMC012133	9130017N09Rik-NM_30218-mMC012133	1.31592	0.12137	-0.176159	-0.426988	0.215879	-0.320404	0.389139
12192	4	81	32	mMC017096	2310032F03Rik-XM_130301-mMC017096	1.31469	0.222456	0.708285	0.145406	-0.139336	0.0294826	0.00276416
13544	5	16	8	mMC010578	0610009K11Rik-NM_26689-mMC010578	1.31382	0.601377	0.355337	-0.330526	-0.177094	-0.0191166	0.40129
14284	3	39	12	mMC023243	D130027J01Rik-No acc-mMC023243	1.31353	-0.379611	0.396835	-0.147988	-0.41232	-0.387958	0.205149
9396	3	94	20	mMC009125	Cyp2g1-NM_13809-mMC009125	1.3128	1.73868	1.3209	-0.12915	0.798943	-0.411974	0.0104472
1714	1	54	18	mMC005126	1110004B13Rik-NM_25838-mMC005126	1.31274	0.419695	-1.396	0.115389	-0.183461	-0.483957	0.118608
15350	5	72	22	mMC015958	2700068H02Rik-No acc-mMC015958	1.31257	1.47951	0.588686	-0.115871	-0.0154318	-0.404569	4.85481e-06
19153	6	83	17	mMC017150	BC027072-NM_146082-mMC017150	1.3117	0.381621	-0.595702	-0.965785	-0.20618	0.297992	0.00664657
8681	3	72	9	mMC006690	9630045H20Rik-No acc-mMC006690	1.31096	0.15284	0.0480969	-0.0955306	0.227321	-0.104822	0.956194
3764	2	18	20	mMC001549	C030044C12Rik-No acc-mMC001549	1.31045	-0.0749627	0.107023	0.350161	-0.160307	-1.06826	0.897152
6141	2	92	29	mMC008708	Stx1a-NM_16801-mMC008708	1.31031	0.684223	1.15073	-0.298806	-0.0480305	-0.130806	0.028649
19193	6	84	25	mMC017087	Olfr1360-NM_146543-mMC017087	1.31018	0.591495	0.024101	-0.373328	0.407846	-0.595412	0.44672
7404	2	28	12	mMC022099	Ovca2-NM_27136-mMC022099	1.3098	0.446523	0.789253	-0.532983	-0.283355	-0.335926	0.22638
17139	6	20	19	mMC010941	1110001J03Rik-NM_25363-mMC010941	1.30892	0.678565	-0.70898	-0.525071	0.258063	-1.14066	0.0842881
5591	2	75	23	mMC007263	Klk10-NM_133712-mMC007263	1.30878	1.08109	-0.636968	-0.52063	0.0148053	-0.636797	0.0121033
3556	1	112	4	mMR030285	Psma5-NM_11967-mMR030285	1.30851	-0.338533	1.13524	0.371475	-0.228751	-0.36192	0.115657
3242	1	102	10	mMR029314	Pcdhgb1-NM_33574-mMR029314	1.30719	-0.313267	-0.221228	0.378613	-0.141284	0.365838	0.0481026
14201	5	36	25	mMC012575	2200001I15Rik-NM_183278-mMC012575	1.30715	0.851621	0.76809	-0.85327	0.300329	-0.0574748	0.0404946
9372	3	93	28	mMC008864	4933402J24Rik-XM_131279-mMC008864	1.30706	-0.504961	0.179561	0.101085	-0.0983966	-1.08856	0.184843
7098	2	18	26	mMC021135	Casc3-NM_138660-mMC021135	1.30661	0.811764	0.836182	-0.642892	-0.152413	-0.323817	0.0377788
13615	5	18	15	mMC010811	Ccl11-NM_11330-mMC010811	1.3062	0.504883	1.05073	-0.439839	-0.246863	0.870181	0.00450328
3699	2	16	19	mMR001437	Zdhhc3-NM_26917-mMR001437	1.30576	-0.464087	0.758282	0.0467008	-0.620072	-0.221246	0.417886
15433	5	75	9	mMC016474	Gabarapl1-NM_20590-mMC016474	1.30452	0.317064	1.42685	0.556148	0.471849	0.801369	0.419876
10793	4	38	9	mMC012826	Olfr1018-NM_146586-mMC012826	1.30417	0.142502	1.23013	0.399405	0.492654	-0.20793	0.29025
13701	5	21	5	mMC011281	4930511J11Rik-NM_29070-mMC011281	1.30413	0.828965	0.857616	-0.283897	0.158278	-0.342623	0.0436727
13240	5	6	24	mMC009639	Ndufa8-NM_26703-mMC009639	1.30374	1.38658	0.645477	-0.983865	0.981095	-0.485201	0.0995565
13478	5	14	6	mMC010401	Adarb1-NM_130895-mMC010401	1.30351	0.371508	0.77947	-0.421703	-0.069566	-0.629202	0.0855576
11976	2	171	8	mMO036010	mtDNA-completeGenome_10-mMO036010	1.30329	0.94053	1.1287	-0.720032	-0.126724	-0.674148	0.00164739
6121	2	92	9	mMC008706	Asl-NM_133768-mMC008706	1.30191	0.84557	0.809752	-1.04567	-0.314622	-0.185322	0.00147212
6547	2	1	19	mMC019757	Rpl30-NM_9083-mMC019757	1.30101	0.60359	1.3746	-0.444237	-0.554501	1.05831	0.00403837
17928	6	45	8	mMC013442	Slc37a2-NM_20258-mMC013442	1.30075	-0.263157	0.779797	-0.185682	-0.00507009	-0.968894	0.139535
11899	2	168	27	mMO035592	Nol3-NM_30152-mMO035592	1.30067	0.102146	1.14925	-0.237267	-0.558125	0.0230561	0.000493796
8406	3	63	22	mMC005966	Glrp1-NM_8132-mMC005966	1.30027	-0.649745	-0.228378	0.495702	-0.0200846	-0.948629	0.420104
16585	3	111	9	mMR030202	Card15-NM_145857-mMR030202	1.29928	-0.358947	0.269481	0.307489	-0.285003	-0.347986	0.367195
8802	2	72	2	mMR026321	1810009O10Rik-NM_197989-mMR026321	1.29879	0.682649	0.967096	-1.12322	-0.218294	-0.439803	0.0222285
7403	2	28	11	mMC022171	Mt1-NM_13602-mMC022171	1.2978	1.89577	2.55223	-0.808243	-0.375194	0.664857	0.000649347
1559	1	49	23	mMC024439	Rps26-NM_13765-mMC024439	1.29771	1.26939	1.82888	-0.371426	-0.600207	0.478789	0.0167601
17643	6	36	11	mMC012475	0710007G10Rik-No acc-mMC012475	1.29746	0.224361	-0.0141373	-0.332421	-0.0878207	-0.136625	0.0368129
17872	6	43	16	mMC013283	Apoa1bp-NM_144897-mMC013283	1.29728	-0.458117	0.0554459	-0.264919	-0.201835	-0.585661	0.248967
6106	2	91	26	mMC008751	6330406L22Rik-NM_27521-mMC008751	1.29614	0.420304	0.79664	-0.354953	-0.267767	-0.543334	0.0668641
15551	5	78	31	mMC016600	AL033326-NM_19705-mMC016600	1.29611	0.844468	0.541228	-0.343219	0.190829	-0.807093	0.00137878
13879	5	26	23	mMC011583	Amhr2-NM_144547-mMC011583	1.29595	0.906485	1.34544	-0.940072	-0.103834	-0.625068	2.23857e-05
18631	6	67	7	mMC015634	4930566A11Rik-No acc-mMC015634	1.2959	-0.108033	-0.033861	0.0174684	0.761584	-0.874694	0.112845
9458	3	96	18	mMC008974	Spp2-NM_29269-mMC008974	1.29534	0.1849	1.58236	-0.372818	-0.220462	1.03635	0.205404
2184	1	69	8	mMC026306	Zbtb4-XM_126150-mMC026306	1.29515	0.312271	0.375665	-0.0787434	-0.1174	0.28857	0.492827
9095	3	85	7	mMC008138	5730502D15Rik-NM_26485-mMC008138	1.29483	-0.0210401	0.574331	-0.377898	0.375808	-0.653329	0.0179868
13840	5	25	16	mMC011643	LOC330052-No acc-mMC011643	1.29451	0.778104	1.42825	-1.25369	-0.121658	1.45953	0.000336906
1957	1	62	5	mMC005913	Iqce-NM_28833-mMC005913	1.2945	1.03648	1.66923	0.295018	0.270734	0.068221	0.382683
11870	4	71	30	mMC015788	Galk1-NM_16905-mMC015788	1.29432	0.196862	1.89094	-0.188054	0.0880275	-0.0833294	0.0101306
10812	4	38	28	mMC012808	Pdxp-NM_20271-mMC012808	1.29399	0.0265939	0.182139	0.195356	-0.154635	0.416445	0.475438
540	1	17	28	mMC001760	Leng8-NM_172736-mMC001760	1.2933	0.258977	0.97767	-0.183793	-0.567844	0.107243	0.27914
8366	2	58	14	mMC024972	Cln8-NM_12000-mMC024972	1.29324	0.23747	1.22826	-0.639858	-0.578457	0.0524855	0.0187392
14789	5	55	5	mMC014553	A630039F14Rik-XM_146705-mMC014553	1.29299	-0.37999	-0.369957	-0.0199451	0.401287	0.236443	0.057202
11876	4	72	4	mMC016077	Apex1-NM_9687-mMC016077	1.29225	-0.109056	0.662093	-0.120374	0.106351	-0.0390569	0.421544
16790	3	117	22	mMR030726	Cntn2-NM_11531-mMR030726	1.29167	-0.447317	1.15632	-0.0828491	-0.27186	-0.552455	0.000477292
13585	5	17	17	mMC010902	Cib3-XM_356089-mMC010902	1.29165	0.261747	0.776961	-1.32754	-0.789048	0.537339	0.000390783
2716	1	85	28	mMR027872	Ensa-NM_19561-mMR027872	1.2915	0.357598	0.471198	-0.766014	-0.443777	0.631859	0.0809093
3507	2	10	19	mMC000853	Tbrg4-NM_134011-mMC000853	1.29052	0.375248	-1.29438	-0.013081	-0.280069	-0.677308	0.95937
18719	6	69	31	mMC015824	4930542N06Rik-No acc-mMC015824	1.29039	-0.24257	-0.781848	0.655995	0.274183	-0.709896	0.941797
19255	6	86	23	mMC017623	Map2k4-NM_9157-mMC017623	1.29007	-0.170515	-0.422618	0.274245	-0.0169408	-0.034969	0.559303
18826	6	73	10	mMC016154	Abca15-NM_177213-mMC016154	1.29001	0.223523	0.473358	-0.0214849	0.320672	-1.00108	0.124379
14627	5	50	3	mMC013885	1810057E01Rik-NM_30749-mMC013885	1.28989	1.11963	0.161502	-0.17692	-0.0187778	0.194144	0.0282736
11934	4	73	30	mMC016348	Map17-NM_26018-mMC016348	1.28938	0.298153	0.412245	-0.290184	-0.0387465	0.787592	0.0849138
[truncated: 3,827 more rows]

## Sheet: cipro
Name	cipro 1h	cipro 3 h	cipro 5h
Fxyd2-NM_7503-mMC007046	3.85527	0.428705	0.715816
5730453H04Rik-No acc-mMC009911	3.46309	-0.194926	-0.81141
Igf1-NM_10512-mMC021536	3.38468	1.43541	0.220655
Olfr976-NM_146367-mMC011071	3.36731	0.0291945	0.937094
2400006N03Rik-XM_126152-mMC010995	3.3265	0.485237	0.980079
Stk3-NM_19635-mMC007642	3.29875	0.663307	1.29747
1700112M01Rik-No acc-mMC012772	3.29199	-0.547191	0.543166
E2f3-XM_127250-mMC005085	3.2396	-0.27065	-1.59419
Nrxn3-NM_172544-mMC016249	3.21829	0.103828	0.364906
9430025M21Rik-XM_355205-mMC009154	3.19289	2.85422	-0.70376
Ndrg1-NM_10884-mMC017365	3.18726	0.0292462	-1.12832
Sstr4-NM_9219-mMC008252	3.18127	-0.161147	0.727109
Ap1s1-NM_7457-mMC007735	3.1335	-0.318665	1.14211
4930425K24Rik-No acc-mMC005492	3.13014	-0.533268	0.377004
5033425B01Rik-No acc-mMC011504	3.11067	-0.361895	0.496479
Tyms-NM_21288-mMR029038	3.0864	0.450886	0.34541
Cpa5-NM_144537-mMC009114	3.08306	1.16377	-0.374715
Zfp64-NM_9564-mMR030216	3.07077	0.246919	0.181198
Cfh-NM_9888-mMC002804	3.05529	-0.342573	1.41958
5830432F11Rik-No acc-mMC014460	2.99461	-0.955656	-0.0383946
Zfp180-NM_172483-mMR029398	2.9941	0.192155	0.73044
D430030K24Rik-NM_178732-mMR028973	2.99208	0.377056	1.26312
4930477O03Rik-No acc-mMC014843	2.98767	-0.927548	0.203833
4930430O22Rik-No acc-mMC006751	2.96714	0.909143	0.835755
4921511F01Rik-NM_27583-mMC010895	2.96123	0.183726	0.428887
5033406O09Rik-No acc-mMC021823	2.93152	0.217136	-1.58862
Pdzk2-NM_133226-mMC011393	2.9204	-1.69054	0.27928
Mup2-NM_8647-mMR027586	2.91166	1.18055	0.610135
D11Bwg0517e-No acc-mMC023761	2.90599	0.927054	0.840148
Cd68-NM_9853-mMC007570	2.90441	-0.182499	-0.0436528
Sema5a-NM_9154-mMC010411	2.89324	0.82019	2.2854
Nap1l1-NM_15781-mMC011480	2.89263	-0.799277	-0.0864961
Saa3-NM_11315-mMC007240	2.89109	2.71106	0.855364
2600017J23Rik-NM_25566-mMC013735	2.86039	-0.16685	0.00786492
Clic1-NM_33444-mMC006119	2.85806	1.2409	-0.385243
Dpysl2-NM_9955-mMC006656	2.85492	0.783587	0.126999
Plp1-NM_11123-mMC008724	2.85379	0.449938	0.57212
A130035F20-No acc-mMC016678	2.85221	-0.487394	-0.13285
A430096B05Rik-XM_488307-mMC010734	2.84775	0.338776	-1.02152
Zmynd10-NM_53253-mMC003333	2.83304	1.20316	-0.496231
Otoa-NM_139310-mMC015846	2.82433	2.43032	1.54598
Kif9-NM_10628-mMC010641	2.82205	-0.2156	0.0772259
Letm1-NM_19694-mMC011452	2.82141	-0.585983	-0.339366
Sepp1-NM_9155-mMC005384	2.81727	-0.258992	-1.16558
1500015A07Rik-No acc-mMC008718	2.8116	-0.699797	-0.44831
Dntt-NM_9345-mMC012233	2.78733	1.26567	1.34886
4930413F20Rik-No acc-mMC010963	2.77392	0.379571	0.469738
1110007F12Rik-NM_197986-mMC014184	2.7737	0.090468	0.994202
Terf2-NM_9353-mMC015594	2.76494	0.022681	0.453528
BC026657-NM_29895-mMC010103	2.76351	-0.949927	-0.371305
9130221J17Rik-No acc-mMC010014	2.76193	-0.51778	0.729939
mmu-miR-206.miRNA-Tagged-Template-No acc-mMO036015	2.75921	0.0892145	0.543122
8430428J23Rik-No acc-mMC003371	2.75705	0.35456	-0.00745368
2410015M20Rik-NM_153152-mMC022299	2.74475	0.584965	-0.180536
Cmklr1-NM_8153-mMC010932	2.74237	0.927929	0.638988
B4galt7-NM_146045-mMC009623	2.73261	0.669999	1.33813
Ppic-NM_8908-mMC013968	2.73211	-0.358238	0.324201
1110055L24Rik-NM_25422-mMC005582	2.73186	0.0169255	0.279916
C230006B22Rik-No acc-mMC008371	2.72797	-0.148374	0.352086
Plekha3-NM_31256-mMC008468	2.72515	0.277736	0.905747
Gdap1l1-NM_144891-mMC009853	2.72493	0.541127	0.534963
Btbd9-NM_172618-mMC008544	2.72161	0.563436	0.782067
Abcc2-NM_13806-mMC015862	2.71792	-0.0572239	-0.0271227
Mup1-NM_31188-mMR029894	2.70649	1.49144	1.35667
Adamts2-NM_175643-mMC009994	2.70545	0.379282	1.37065
Ly64-NM_10739-mMC005694	2.7007	-0.479372	0.324261
Txndc4-NM_29572-mMC007342	2.70011	0.470942	1.04506
Slc27a3-XM_130954-mMC009238	2.69391	-1.09229	-0.414368
Hap1-NM_10404-mMC004559	2.68864	0.451292	-1.84952
Alx4-NM_7442-mMC009678	2.67798	-0.613307	0.678955
5830456J23Rik-No acc-mMC006191	2.67608	1.28522	1.79997
Mrgprb2-NM_175531-mMC011266	2.671	0.944652	1.66432
A830031M15Rik-No acc-mMC005245	2.66089	1.18255	0.534
Was-NM_9515-mMC009138	2.66088	-0.0255793	-0.583891
Rae1-NM_175112-mMC021781	2.65863	-0.0825727	0.171449
Chrna9-XM_132045-mMC007903	2.65756	1.74277	1.52798
Cul7-XM_358324-mMC007169	2.65437	0.28132	-1.96694
Clecsf12-NM_20008-mMC010574	2.65298	0.600713	-0.225385
AI314180-NM_172381-mMR030730	2.65157	0.553002	0.332253
Hr-NM_21877-mMC022971	2.65011	1.28074	0.29359
5830445O15Rik-XM_485053-mMC021800	2.64551	1.12776	2.85933
E030041M21Rik-NM_29166-mMC004896	2.6452	-0.328127	-1.02363
1700021F13Rik-No acc-mMC009288	2.64105	0.589244	0.138953
AW124722-XM_139515-mMC011034	2.63093	0.515845	0.832535
2210013M04Rik-NM_178595-mMC008262	2.61771	0.827436	0.434723
4921539H07Rik-No acc-mMC010524	2.61545	-0.0743546	-1.97459
Ttn-XM_130322-mMC007968	2.6077	1.10554	0.999945
Litaf-NM_19980-mMC011802	2.60413	1.46401	1.86875
Ggta1-NM_10283-mMC009228	2.60381	0.644414	0.406226
9430098E02Rik-XM_134253-mMC004944	2.60246	0.651964	-1.47968
Rgs7-NM_11880-mMC009515	2.60108	0.289161	0.858035
Slc39a9-XM_484158-mMR031159	2.59843	-0.185734	0.610444
Zfp1-NM_11742-mMC008199	2.59435	0.0263634	0.285603
A830009L08Rik-No acc-mMC007628	2.59371	1.10568	1.36025
1190003J15Rik-XM_133915-mMC011753	2.59145	0.349828	0.690977
Smu1-NM_21535-mMC013263	2.58871	-0.865297	0.255724
Il11ra2-NM_10550-mMR027838	2.58639	-0.440037	0.634884
Arhgef12-NM_27144-mMC009054	2.5854	0.382209	0.348185
E230011A21Rik-NM_177091-mMC007506	2.5835	1.28655	1.79018
Kcnj10-NM_20269-mMC012479	2.58028	0.0833514	0.226947
Hist1h2af-NM_175661-mMC021358	2.57971	2.39848	0.881598
0610009H04Rik-NM_18854-mMC012723	2.57733	-0.150757	-0.712155
A030010E16Rik-No acc-mMC017654	2.57682	-0.132242	-0.764443
Samd7-XM_130828-mMC019621	2.57629	0.839746	0.202224
Mrpl34-NM_53162-mMC007479	2.57248	0.734367	0.0375437
Prdm13-XM_131309-mMC011918	2.5707	0.3217	-0.250558
Rims4-NM_183023-mMC015732	2.56754	0.733145	0.936668
Zbtb7-NM_10731-mMC008060	2.56402	0.634771	1.03016
Ssr1-NM_25965-mMC010500	2.56039	0.360263	0.494874
Fga-NM_10196-mMC003895	2.55687	1.43282	1.51741
Olfr1519-NM_146399-mMC008073	2.55262	1.32447	-0.232154
Neu4-NM_173772-mMC008587	2.54971	-1.06716	0.381605
A930008G19Rik-NM_175268-mMC011243	2.54578	-0.246043	0.262634
Ube2e3-NM_9454-mMC016136	2.54168	-0.404506	-0.749185
6330412F12Rik-NM_16736-mMC010983	2.54073	-0.0666711	0.565474
Stmn4-NM_19675-mMC005752	2.53689	1.01249	1.54234
Disp2-NM_170593-mMC010039	2.5334	0.699007	1.09249
Rrm2-NM_9104-mMR030658	2.53147	0.880875	0.488747
Cacna1g-NM_9783-mMC011046	2.52704	-0.810146	0.394968
Gli3-NM_8130-mMC011030	2.52599	-0.795054	0.882737
7420701I03Rik-No acc-mMC010819	2.52378	-0.437912	0.667977
Dnmt3l-NM_19448-mMC011955	2.52325	1.87437	2.06803
2900011O08Rik-NM_144518-mMC011149	2.52062	0.781343	1.07801
Agpat4-NM_26644-mMC008482	2.51169	0.2629	0.513086
Mmd-NM_26178-mMC011047	2.51044	-0.117037	-0.65475
H2-Q7-NM_10394-mMC021753	2.51015	0.832742	0.428757
Hist1h2ag-NM_178186-mMR029890	2.50886	1.57054	0.408649
1110059E24Rik-NM_25423-mMR029011	2.50804	0.00925383	0.445109
4921511C16-NM_183307-mMC003577	2.506	0.641023	-0.330128
Suclg2-NM_11507-mMC014613	2.50474	0.485578	0.592023
Narg2-NM_145618-mMC013312	2.50183	-0.719377	-0.966016
D430040L24Rik-No acc-mMC011419	2.49562	1.01952	0.282949
1110058L19Rik-NM_26503-mMC011327	2.49508	0.236397	0.0399002
Tmem19-NM_133683-mMC005518	2.49172	0.698459	0.699521
Tmpit-NM_172541-mMC012364	2.49132	0.53325	0.217067
4931428L18Rik-NM_27637-mMC006959	2.48655	-0.174939	0.414903
B130005I07Rik-No acc-mMC011804	2.48641	-1.28501	-1.76312
Fn1-NM_10233-mMC005040	2.47996	1.96317	1.90611
Grap-NM_27817-mMC008931	2.47977	1.04675	1.4843
1110063F24Rik-NM_133889-mMC012164	2.47738	-1.16895	0.369645
Dgkg-NM_138650-mMC012008	2.47568	0.98947	0.827082
4930432J09Rik-No acc-mMC007951	2.4705	-0.125094	0.298876
Dgkz-NM_138306-mMC009100	2.46395	0.470264	1.04045
Ptgfr-NM_8966-mMC010992	2.46288	-0.296324	-1.47368
2410016F19Rik-NM_26113-mMC014496	2.46229	0.389763	0.0983145
2310045N01Rik-XM_486121-mMC025991	2.45754	0.749341	1.32325
Tcf20-NM_13836-mMR030698	2.45296	-0.231828	0.531901
1700041I07Rik-No acc-mMC009682	2.45021	0.748198	0.96245
BC023835-NM_172116-mMC010018	2.44885	-0.0205102	0.410175
Rspondin-NM_138683-mMC010970	2.44879	0.769065	1.25929
Polm-NM_17401-mMC010942	2.44854	-0.254585	-0.426003
Prx-NM_19412-mMC021783	2.44851	-0.115853	-0.305707
Pcsk4-NM_8793-mMC010110	2.44797	0.335738	0.927496
Arid1a-NM_33566-mMR028427	2.44725	0.92156	0.797687
Cklfsf3-NM_24217-mMC007904	2.44653	0.644513	0.78141
A530001N23Rik-No acc-mMC009344	2.44643	0.487451	0.958865
Tcra-V22.1-No acc-mMR028142	2.44575	0.737096	0.390975
IGKV12-44-AJ235955-mMO036223	2.4448	0.538932	0.809299
4833426J09Rik-No acc-mMC010971	2.44208	0.555707	0.984376
4930417G10Rik-XM_484109-mMC009304	2.43826	1.10316	1.1067
9230118N01Rik-No acc-mMC002419	2.43716	-0.309122	-0.735839
Lrfn2-XM_128642-mMC011219	2.43677	0.397543	0.813626
Syt12-NM_134164-mMC004618	2.43485	-0.144814	0.183615
A630043P06-XM_488662-mMC014703	2.43281	0.0108491	0.555682
Slc39a6-NM_139143-mMC005198	2.43279	-0.709438	0.954013
2900024O10Rik-XM_487295-mMC011304	2.43109	-0.944721	0.0836229
E130102C15Rik-No acc-mMC008955	2.42219	0.295625	1.23224
1700048F04Rik-No acc-mMC008930	2.42096	1.73881	1.52469
Cecr2-XM_489839-mMC007085	2.41949	1.00833	-0.224246
D6Ertd253e-NM_178608-mMC016608	2.41824	0.230408	0.826339
Ak7-No acc-mMC005837	2.41667	-0.466596	-0.563857
A230050P20Rik-NM_175687-mMC008981	2.41561	0.932943	1.33283
4933412E12Rik-No acc-mMC007482	2.41412	0.542186	1.16583
Jam3-NM_23277-mMC010410	2.41348	0.143557	1.15239
Mppe1-NM_172630-mMC007294	2.41259	0.379832	1.20238
Tpx2-NM_28109-mMC008389	2.41251	0.483469	-2.49552
Slc8a3-NM_80440-mMC014671	2.41182	-0.227884	0.0744576
Xpo6-NM_28816-mMC008063	2.41032	-0.155974	-0.337679
Ramp2-NM_19444-mMC007333	2.40042	1.82982	0.887256
Col2a1-NM_31163-mMC003430	2.3988	1.65182	-0.199957
6330411E07Rik-No acc-mMC009499	2.39879	0.275803	-1.19855
4930412L05Rik-XM_489045-mMC008156	2.39041	0.0493941	1.31206
Ldb3-NM_11918-mMC009174	2.38919	-0.403754	0.596467
2210009P08Rik-No acc-mMC012903	2.38913	-0.783356	-1.03643
Zfp369-NM_178364-mMC022235	2.38895	1.55268	1.56947
E030034P13Rik-NM_153791-mMC013995	2.38597	2.00735	-0.179246
Mug1-NM_8645-mMC021446	2.38494	1.09566	1.94162
4930528H21Rik-XM_149834-mMC008157	2.38263	-0.196431	0.965765
A230071N21Rik-No acc-mMC010535	2.38155	0.32109	0.291522
R3hdm-NM_181750-mMC005617	2.38143	0.425134	0.471137
2310015N21Rik-NM_181397-mMC010677	2.37981	0.38075	1.41512
A930004J17Rik-No acc-mMC012075	2.3798	0.224313	0.685369
1700061J05Rik-XM_181371-mMC007768	2.3776	0.735697	0.490488
Gpr22-NM_175191-mMC003372	2.37683	0.577288	0.875597
9230118O15Rik-NM_183127-mMC010338	2.37375	-0.0160657	1.92141
Eppb9-NM_13717-mMC011540	2.37179	0.3716	2.22218
Optn-NM_181848-mMC009497	2.37112	0.218076	1.0053
C030033M12Rik-No acc-mMC007606	2.36511	0.619792	1.45856
2310043D23Rik-No acc-mMC005676	2.36133	0.461108	1.34574
Hivep1-NM_7772-mMC025323	2.35916	0.827319	2.25501
Dazap1-NM_133188-mMC005786	2.35848	1.89169	0.976431
2310051M13Rik-NM_27344-mMC006703	2.35788	0.186711	-3.51955
A130038L21Rik-NM_172588-mMC022743	2.35741	0.504508	0.969572
2700091N06Rik-NM_26028-mMC012534	2.35574	0.00660154	1.4813
Slc10a1-NM_11387-mMC002873	2.35515	0.7274	0.123247
4930445E18Rik-No acc-mMC009089	2.35496	-2.02738	0.411926
5033405K12Rik-NM_153567-mMC007420	2.35236	0.811045	1.04098
4930578M01Rik-No acc-mMC004033	2.35161	1.08072	1.16955
Fbxo44-NM_173401-mMC006211	2.34859	0.562624	1.12097
B2m-NM_9735-mMC006339	2.34774	0.618889	1.13887
Snx10-NM_28035-mMC012862	2.34696	-0.220238	0.235894
Rbpms-NM_19733-mMC016216	2.34593	0.418084	0.249559
Ccdc3-XM_129987-mMC017431	2.34573	-0.0538131	-0.249117
Hhip-NM_20259-mMR029469	2.34454	-0.512079	0.4774
Npy2r-NM_8731-mMC008879	2.34423	-0.00439057	0.988851
IGHV9S7-L14367-mMO036183	2.34415	-1.79095	0.140957
5031434C07Rik-NM_177012-mMC007632	2.34223	0.832064	1.32669
6330408A02Rik-NM_177312-mMC013268	2.33933	-0.217124	1.25807
Adamts20-NM_177431-mMC008159	2.33854	0.369643	1.28789
H2-Q1-NM_10390-mMR029512	2.33767	-0.463746	0.282771
Foxo3-NM_19740-mMC014829	2.33735	1.30068	1.19569
Ly6g5c-NM_148947-mMC012923	2.33729	-0.511886	0.352927
Dysf-NM_21469-mMR030255	2.33684	-0.304412	0.247156
Aqp4-NM_9700-mMC006379	2.3362	0.152605	-1.53849
Fance-XM_283409-mMC008288	2.33437	0.0836209	0.663331
Hapln3-NM_178255-mMC012555	2.33214	-0.205051	1.21223
Rps6kb2-NM_21485-mMR030816	2.33157	0.654576	0.372287
6030468B19Rik-XM_126537-mMC006490	2.32866	0.825025	0.160835
Mgam-XM_133071-mMC003832	2.32814	-0.358231	0.938599
Endog-NM_7931-mMC010391	2.328	0.121482	0.37914
Serpina3m-NM_9253-mMC021608	2.32636	1.33156	2.39356
1600025M17Rik-XM_150405-mMC003005	2.32505	-1.22785	0.521663
Bag1-NM_9736-mMC010989	2.32358	0.838848	1.08552
Uts2r-NM_145440-mMC008014	2.32248	0.884707	0.772136
Lamr1-NM_11029-mMC011025	2.32239	0.0741403	-1.13749
C530024P05Rik-NM_177292-mMC008261	2.3223	-0.212438	0.931795
3010031K01Rik-No acc-mMC006600	2.32189	1.75741	0.0349935
Ptprd-XM_131462-mMC022891	2.31907	0.719441	0.916166
Dnajb3-NM_8299-mMC015477	2.3183	-0.351851	0.20821
Pecam1-NM_8816-mMC005668	2.31829	0.658238	-0.853617
Fbp1-NM_19395-mMC007787	2.31738	0.886842	2.2707
Rarg-NM_11244-mMC016022	2.31708	0.284824	-0.0998085
Gamt-NM_10255-mMC010475	2.31424	1.14033	2.03848
Ing1l-NM_23503-mMC009778	2.30893	0.480365	0.727043
9130227C08Rik-NM_27143-mMC005563	2.30807	0.186075	-0.714455
4930456J16Rik-No acc-mMC001975	2.30793	-0.0701263	1.01917
4930435E12Rik-XM_358794-mMC007702	2.30787	-0.0303679	-0.997833
C230007H23Rik-No acc-mMC011925	2.30622	-0.0339052	1.15664
D10Ertd516e-XM_125901-mMC012416	2.30494	-0.675711	0.117292
1810063I02Rik-No acc-mMC010930	2.30223	0.548841	1.65706
2310040M23Rik-No acc-mMC010044	2.30044	-0.0785249	-0.5797
Lyzl4-NM_26915-mMC010784	2.29952	-0.0987661	0.243717
1300019C06Rik-NM_25832-mMC009076	2.29946	0.170838	1.00542
Adcy4-NM_80435-mMC009519	2.29775	0.734168	0.80863
Ascc3l1-NM_177214-mMC010801	2.29654	0.793092	0.761198
Itpkb-XM_205854-mMC010961	2.29382	0.412036	-0.00360503
2600001M11Rik-No acc-mMC006911	2.29375	-0.254497	0.192413
Prkra-NM_11871-mMC016468	2.29324	-0.0980766	-0.0423962
Cyp4a10-NM_10011-mMR029966	2.29228	0.38484	0.538974
6720454L07Rik-No acc-mMC010827	2.29165	0.237269	0.624167
4921511C10Rik-No acc-mMC022307	2.29129	0.296422	0.349713
Rnf121-NM_29211-mMC014528	2.29102	-0.249604	-0.138873
Mapk14-NM_11951-mMC002605	2.29048	1.22849	-0.844657
AW210570-NM_25296-mMC007709	2.2903	0.543104	-0.289533
Prodh2-NM_19546-mMC006790	2.29007	0.948613	0.03535
Dok3-NM_13739-mMC007630	2.28752	0.604319	1.28301
Cxcl12-NM_13655-mMR030418	2.28681	0.397611	0.226536
Cdk10-NM_194444-mMR029892	2.28626	1.32951	1.69381
Tceb3bp1-NM_25852-mMR030038	2.28433	0.350453	0.394954
Prh1-NM_11174-mMC022872	2.28432	0.686129	0.200688
Lmtk2-XM_132499-mMC012260	2.28428	-0.378712	1.16645
Mcf2l-NM_178076-mMR028928	2.28389	0.144406	0.98187
Scd1-NM_9127-mMC010577	2.2811	-0.785863	-0.731954
A130007F10Rik-NM_175539-mMC015981	2.28051	-0.937504	0.16219
Olfr157-NM_19475-mMC012722	2.28042	0.56317	0.622039
Rab11a-NM_17382-mMC015258	2.2803	1.04991	0.367859
Gzmf-NM_10374-mMC012404	2.27991	-0.44688	-0.946179
1110003P22Rik-NM_144522-mMC015868	2.27908	-0.175247	-0.235969
Aldh3b1-NM_26316-mMC025280	2.27905	1.18233	1.07625
4930579D09Rik-No acc-mMC013740	2.27697	0.73078	1.30861
5730421K10Rik-No acc-mMC024803	2.27439	-0.464946	1.06806
Zfp367-NM_175494-mMC014395	2.27179	0.709702	-0.233719
Gsto1-NM_10362-mMC004833	2.27084	0.880155	0.754529
Galnt2-NM_139272-mMC006623	2.27077	0.0397259	-0.0322348
2900001G08Rik-No acc-mMC008165	2.26916	0.608996	1.65538
Zfp162-NM_11750-mMC004404	2.26867	0.588656	0.279491
1600002K03Rik-XM_354548-mMC008505	2.26521	-0.0587742	-2.44871
Set7-NM_80793-mMC003171	2.2645	-0.171696	-1.04315
2610510H03Rik-NM_26620-mMC008626	2.26289	-0.0315629	0.294858
Adam28-NM_10082-mMC025394	2.26083	-0.138438	-0.0312575
Ipo4-NM_24267-mMC010897	2.25926	0.740025	1.10054
Tdo2-NM_19911-mMC020310	2.25717	1.66887	0.58389
AI481316-No acc-mMC007122	2.25486	0.795035	-0.0401915
AI844366-NM_177906-mMC003322	2.25357	-0.381416	-0.12248
Llglh2-NM_145438-mMC011789	2.25234	-0.208711	0.37961
Clstn2-NM_22319-mMC010400	2.25173	-0.596784	-0.66909
2410004H02Rik-NM_145954-mMC011557	2.25117	0.705069	0.893795
Psmb8-NM_10724-mMC013062	2.24995	0.0399314	0.330306
Ogfr-NM_31373-mMC007961	2.2493	2.94832	0.202544
BC034834-NM_1001446-mMC022334	2.24779	0.926111	0.287013
Rfrp-NM_21892-mMC012477	2.24662	-0.0965354	0.151891
Plxnb1-NM_172775-mMC003547	2.24583	0.188918	-0.424071
Tcp1-NM_13686-mMC015104	2.2454	0.45474	1.52872
Mug1-NM_8645-mMR029097	2.24374	1.31031	2.76399
Krtap6-3-No acc-mMC015781	2.24361	0.0285921	-0.244533
Myo1d-NM_177390-mMC009768	2.24273	-0.206607	-0.0971775
Sec14l1-NM_28777-mMC007356	2.24261	0.413621	0.959411
Lrch4-NM_146164-mMR031186	2.24103	1.21038	0.734955
4930405E02Rik-No acc-mMC003146	2.24046	-0.332134	-3.70478
BC023754-XM_148895-mMC010325	2.24024	1.06949	-0.341679
4930430F08Rik-NM_175128-mMC002361	2.23998	0.391246	-0.566725
Olfr318-NM_146501-mMC023156	2.23989	-0.175257	0.367121
Fgf18-NM_8005-mMR030823	2.23936	0.796012	1.12611
1110014K08Rik-NM_176902-mMC020771	2.23816	0.394797	0.81815
Tbx21-NM_19507-mMC012547	2.23599	1.30114	0.9561
Sema6c-NM_11351-mMC010623	2.2341	-0.245988	0.204152
5730511K23Rik-NM_19458-mMC004042	2.23185	-0.585571	-0.610861
E230031K19-NM_172786-mMC003101	2.23155	-0.100491	-0.233651
E330032C10-XM_488836-mMC007900	2.23055	0.165014	0.969899
Egr4-NM_20596-mMC015323	2.22792	-0.318296	0.268075
Gm1549-No acc-mMC009838	2.22783	0.820419	0.0647894
Npc1-NM_8720-mMC001746	2.22748	-0.286845	0.403431
Gpiap1-NM_16739-mMC007801	2.22704	0.496693	-0.247057
1700099I09Rik-No acc-mMC011126	2.22658	-0.132923	0.615598
Pcnt2-NM_8787-mMC009335	2.22585	0.30852	1.10622
AI663987-NM_33526-mMC008758	2.22427	0.599124	0.315966
D630012G11Rik-No acc-mMC011301	2.22299	-0.137663	-0.168256
Gnb2-rs1-NM_8143-mMC016156	2.22245	0.00119878	-0.748382
4933402J15Rik-No acc-mMC017895	2.21912	-0.229777	-1.35992
Pias1-NM_19663-mMC009870	2.21911	0.623438	0.474156
Pdcd7-NM_16688-mMC012046	2.21873	-0.0249418	-0.495299
Stat1-NM_9283-mMC009554	2.21822	-0.607947	-1.81572
1700041M19Rik-No acc-mMC009227	2.21755	0.652604	0.53999
Ubxd2-NM_26390-mMC014807	2.21514	-0.246773	0.925363
9330133O14Rik-NM_176948-mMR028333	2.21513	0.123646	0.170726
8030493G06Rik-No acc-mMC005981	2.21457	0.747076	1.24271
1700024K14Rik-NM_30179-mMR026464	2.21448	0.907205	0.953666
5730461K03Rik-NM_27475-mMC008588	2.21432	0.674624	0.840459
Cyp4f15-NM_134127-mMC011482	2.21193	0.630376	0.441186
Zfp472-NM_153063-mMC010919	2.21157	-0.156554	-1.32272
2410022L05Rik-NM_25556-mMC016654	2.20946	0.586538	-0.0129166
Gngt2-NM_23121-mMC008599	2.20941	-0.404441	-0.548341
A230106M15Rik-NM_175474-mMC008283	2.20742	0.0537062	-0.176919
4833406L22Rik-No acc-mMC012373	2.20683	-0.265734	0.105922
4933409L14Rik-No acc-mMC009068	2.20639	1.29367	-1.35454
3110003A22Rik-NM_26534-mMC001967	2.20388	0.325809	0.804054
D130073L02Rik-XM_125687-mMC007068	2.20356	0.572428	1.1822
Fcgrt-NM_10189-mMC010681	2.20349	0.562934	0.666919
Aup1-NM_7517-mMC009543	2.20198	0.471236	-0.143908
E130201N16Rik-NM_30024-mMC010861	2.20119	-0.625048	0.341038
Sema3a-NM_9152-mMC011169	2.2011	0.598617	0.349814
4931413I07Rik-No acc-mMC021778	2.20098	-0.210916	-2.33782
C030014K22Rik-NM_175461-mMC008438	2.20064	-0.954701	-0.778543
2610020H08Rik-NM_1004187-mMC012461	2.19925	-1.75502	-0.196187
A430054B03-No acc-mMC005432	2.19904	-0.255387	0.531733
A530083I20Rik-No acc-mMC012676	2.19757	-0.295351	0.35151
Map3k10-XM_194344-mMC007532	2.19496	0.278613	0.974157
2410137M14Rik-NM_29747-mMC013328	2.19439	0.65233	1.12665
Rarb-NM_11243-mMC013376	2.19339	-0.0370869	0.53875
Pygl-NM_133198-mMC007390	2.19137	0.849024	1.3886
Scarb2-NM_7644-mMC007578	2.19009	0.390505	-0.441147
Tex2-NM_198292-mMC014757	2.18831	-0.292443	0.175089
Lba1-XM_284542-mMC011041	2.18666	0.722135	0.534957
4930463O16Rik-XM_483933-mMC014428	2.18664	0.0240327	1.51055
D15Mgi27-NM_134100-mMC012115	2.18654	0.308203	0.638153
Slc25a2-XM_111757-mMC013615	2.18594	-0.0235285	-0.0123245
Olfr43-NM_146711-mMR030866	2.18514	0.462136	1.02877
Stip1-NM_16737-mMC011556	2.18148	-0.0209962	0.661204
2600006L11Rik-No acc-mMC011033	2.18129	1.05071	-0.344137
1700113H21Rik-No acc-mMC009985	2.1806	-0.344084	1.02579
5033428B15Rik-XM_129208-mMC012228	2.17999	1.00132	1.02823
AI662250-NM_178926-mMC008686	2.17982	0.628661	0.744012
Mbd3-NM_13595-mMC010245	2.17937	1.01308	0.451364
Olfr557-NM_146361-mMC012157	2.17587	-0.456696	0.584454
A230087F16Rik-No acc-mMC023126	2.17573	0.58278	0.731212
2310058D17Rik-No acc-mMC008647	2.17497	0.576075	0.644875
0610031J06Rik-NM_20003-mMC010258	2.17373	0.870634	1.01874
Rcn3-NM_26555-mMC013721	2.17355	0.194726	0.457144
Kcnk1-NM_8430-mMC012936	2.17353	0.644526	0.795317
Pacs1-NM_153129-mMC002809	2.17299	0.892608	1.29478
2010005A06Rik-NM_29357-mMC022357	2.17118	0.321156	0.167247
Usp26-NM_31388-mMC006750	2.1704	0.455696	0.734877
Ankrd2-NM_20033-mMC003996	2.16559	0.231314	-0.0318459
5430433E21Rik-XM_134954-mMC015891	2.16493	0.454761	-0.937671
C130073E24Rik-No acc-mMC008297	2.16464	1.22759	0.746851
6530418L21Rik-NM_175398-mMC006558	2.16289	-0.483304	0.0300072
1810021B22Rik-No acc-mMC011612	2.16257	0.71652	1.64926
IGKV8-16-Y15977-mMO036219	2.16081	0.37056	0.684911
D230002A01Rik-NM_176904-mMC011799	2.16032	0.141178	0.188654
Slc1a5-NM_9201-mMC009240	2.159	0.115575	0.0449128
0610033H09Rik-NM_25338-mMC005998	2.15883	0.388736	0.630598
Olfr1395-NM_146877-mMC007825	2.15824	2.22517	1.05061
2310007B03Rik-NM_172411-mMC004410	2.15787	0.423691	0.815158
4930447I22Rik-No acc-mMC005170	2.1578	0.771615	0.265135
Msh6-NM_10830-mMC012069	2.15639	-0.287034	0.435449
Pdcl2-NM_23508-mMC015280	2.15509	-0.348456	-0.0920981
Zfp133-No acc-mMC007518	2.15355	0.742903	0.725066
Ece1-NM_199307-mMC022200	2.15039	0.57533	0.396048
Irx1-NM_10573-mMC009069	2.15032	2.05992	0.0872226
Grem2-NM_11825-mMC004393	2.15022	-0.357478	0.139661
Nkx6-2-NM_183248-mMC003681	2.15016	-0.0429191	0.33926
IGLC2-J00595-mMO036193	2.14551	0.418125	-0.498539
4933412E24Rik-XM_484472-mMC012344	2.14344	-0.475374	-0.296951
Rab11fip5-NM_1003955-mMC011002	2.14283	-0.268637	0.817714
Nit1-NM_12049-mMO035662	2.14129	0.307362	0.134129
Nrd1-NM_146150-mMC008387	2.14117	0.194075	0.276749
4930478P22Rik-No acc-mMC013084	2.14062	-0.427789	0.300487
1190005N23Rik-No acc-mMC025933	2.13876	-0.369449	0.790095
Pklr-NM_13631-mMC007952	2.13863	0.594281	1.04172
A230103J11Rik-No acc-mMC006832	2.13669	0.753996	0.416773
Crsp9-NM_25426-mMC011642	2.13669	0.184963	0.503378
Hist1h1c-NM_15786-mMC010699	2.13581	-0.255004	1.27835
Slc25a15-NM_11017-mMC016253	2.13428	0.0162753	0.410762
4921513D23Rik-No acc-mMC002241	2.13296	0.554928	0.550791
Glyat-NM_145935-mMR027304	2.1328	0.963234	0.372563
Olfr259-NM_146770-mMC010706	2.13274	-0.458051	-0.620802
Anapc1-NM_8569-mMC014986	2.13254	-0.191407	0.433475
Rnf152-NM_178779-mMC012451	2.13251	0.388947	0.544275
Vps16-NM_30559-mMC010928	2.13227	0.317935	0.319283
Frda-NM_8044-mMC017284	2.12952	-1.5787	-0.807867
Psma7-NM_11969-mMC009072	2.12948	0.737509	0.458028
BC059177-NM_198248-mMC004967	2.12932	0.589451	0.900245
Olfr1330-NM_146334-mMC008287	2.12847	0.254714	0.115976
1700126G02Rik-No acc-mMC008467	2.12813	0.261267	0.800152
BC052486-No acc-mMC010694	2.12808	0.332622	0.765831
Mcpt7-NM_31187-mMC002365	2.1277	0.428248	-0.252605
B930095M22Rik-No acc-mMC007344	2.12729	0.673926	1.39285
6330415M09Rik-NM_27539-mMC012377	2.12565	1.39396	1.74523
Gfap-NM_10277-mMR030764	2.12496	0.378656	0.149637
Txnl6-NM_145598-mMC017262	2.12377	0.427209	0.574867
Atp8b3-NM_26094-mMC007929	2.12281	1.74026	0.756776
Runx1-NM_9821-mMC015866	2.12235	0.00803439	0.513329
18S-rRNA_X00686-mMO035975	2.12218	1.48823	0.460052
Nudt4-NM_27722-mMC006826	2.11951	0.0339662	1.14774
1200016G03Rik-XM_283319-mMC008760	2.11907	0.0935521	1.73078
Lhx8-NM_10713-mMC011224	2.11839	0.645949	1.15018
Muc5ac-No acc-mMC005375	2.11795	0.223392	-3.19373
4930563H03Rik-No acc-mMC008334	2.11673	1.03987	1.02461
Rpp14-NM_25938-mMC017334	2.11613	-0.0965207	0.0229996
Surf4-NM_11512-mMC010038	2.11607	0.625544	-0.148289
2810405F17Rik-No acc-mMC014240	2.11602	0.272375	0.143103
3300001G02Rik-NM_30093-mMC009844	2.11493	0.143772	1.44081
Maff-NM_10755-mMC002660	2.11359	0.631591	-0.0397777
1700061J23Rik-No acc-mMC017354	2.11288	-0.0543046	0.275583
Ankfy1-NM_9671-mMC002589	2.10919	-0.325419	-0.355639
2900092C05Rik-NM_28434-mMC015713	2.10873	0.244317	2.09471
Dll1-NM_7865-mMC008611	2.10728	0.873861	-0.0835153
5230401M06Rik-No acc-mMC008519	2.1065	-0.329442	0.707608
4933425B07Rik-No acc-mMC009426	2.10602	0.303463	0.207599
Atf3-NM_7498-mMC009367	2.10436	0.950498	0.69422
2810003K23Rik-XM_126677-mMC011188	2.10299	-0.422694	0.0780918
Cd34-NM_133654-mMC014098	2.10227	-0.467965	-0.382698
Sdhd-NM_25848-mMC010973	2.10085	-0.341675	0.703857
BC030314-NM_146259-mMC012678	2.10079	-0.0202705	-0.296664
A630006J10Rik-No acc-mMC005759	2.10045	0.306434	-0.284468
6330419J24Rik-NM_183030-mMC003125	2.09996	-0.306385	0.542822
Foxn4-NM_148935-mMC012205	2.09994	0.745287	0.575672
4930435F05Rik-No acc-mMC013175	2.09929	-0.273774	0.442711
B230323A14Rik-No acc-mMC010755	2.0991	0.709006	0.583167
Ivl-NM_8412-mMC001920	2.09751	-1.16985	-1.64912
Twist1-NM_11658-mMC005043	2.09654	0.870437	0.709142
Rpl10a-NM_11287-mMC021075	2.09566	-0.655555	1.15709
AI326906-NM_153570-mMC002649	2.09462	0.441209	-0.435239
Acadsb-NM_25826-mMC007270	2.09311	0.0590695	-2.92932
Caml-NM_7596-mMC015534	2.09298	0.668906	0.425929
2310015D24Rik-XM_488767-mMC009935	2.09223	0.510787	0.727542
9930117H01Rik-NM_177260-mMC014968	2.09076	0.205821	0.0917312
4933417E11Rik-No acc-mMC012392	2.0885	0.171705	0.424701
Arc-NM_18790-mMC010162	2.08817	-0.231627	0.153423
2410137F16Rik-No acc-mMC005472	2.08815	0.275064	-0.291944
C030019G06Rik-No acc-mMC012137	2.08792	0.46818	0.375753
Zfp312-NM_80433-mMC010518	2.08787	0.531535	1.02904
2610029K21Rik-NM_25663-mMC002576	2.08713	0.150501	-3.40243
Atp6v1e1-NM_7510-mMC005855	2.08681	-0.249518	0.874685
E230025E14Rik-No acc-mMC001817	2.08577	0.172404	1.08024
4930565N06Rik-No acc-mMC017085	2.08548	-0.410678	-0.670369
Rbm18-NM_26434-mMC013475	2.08516	0.260813	0.337766
Ubb-NM_11664-mMC021970	2.08488	1.29213	1.76449
A530090P03Rik-NM_177155-mMC010978	2.08392	-0.54108	0.537081
AI415330-NM_178114-mMC011594	2.0828	0.105155	0.713013
B630019A10Rik-NM_177072-mMC010667	2.08146	0.350864	1.17676
Fabp9-NM_11598-mMC002316	2.08073	1.0542	0.482569
Ltb4dh-NM_25968-mMC002561	2.07634	-0.199822	-1.30396
D14Ertd500e-NM_145462-mMC011374	2.07579	0.718388	1.05021
C330046E03-No acc-mMR026884	2.07527	0.944443	1.48917
Zfp462-NM_172867-mMC010529	2.07526	-0.473719	1.20129
5330414O08Rik-NM_183270-mMC006809	2.07411	0.276079	0.423225
2310004K06Rik-NM_20050-mMC017108	2.07403	0.190753	0.252166
Mrps12-NM_11885-mMC006418	2.07285	1.03699	-0.0151127
C1rl-NM_181344-mMC014441	2.07284	0.458723	0.298937
Dgcr8-NM_33324-mMC014084	2.07277	0.289143	0.363663
Glis3-NM_175459-mMC011069	2.07249	0.0568255	1.6938
Myo7b-NM_32394-mMC007472	2.0719	0.856068	-0.895825
AW536289-No acc-mMC016273	2.07122	-0.12569	-0.0265517
Anks1-NM_181413-mMC006278	2.0699	0.0994568	0.497229
Dsg4-NM_181564-mMC005936	2.06987	0.702313	0.611238
AI132321-NM_178911-mMC008846	2.0681	0.477378	-0.239058
Slamf8-XM_129596-mMC010121	2.06764	0.275625	-0.32694
2810403A07Rik-NM_28814-mMC010683	2.06757	-0.273262	0.0730293
4921501E01Rik-XM_354902-mMC021246	2.06742	0.0974281	1.05414
Nfil3-NM_17373-mMC010227	2.06715	-0.133371	1.00962
Mug2-NM_8646-mMR026955	2.06545	1.74743	2.16772
Prkwnk4-NM_175638-mMC007670	2.06506	1.00831	0.419668
Thap6-No acc-mMC011396	2.06373	-0.012715	1.38758
4930444A02Rik-NM_29037-mMC008477	2.06261	0.835174	2.1282
D630003M21-NM_177657-mMC012899	2.06223	-0.403687	-0.479462
4932430A15Rik-No acc-mMC002285	2.05991	-0.473056	-1.93641
4931412I15Rik-No acc-mMC011539	2.05949	0.533049	1.27611
Plg-NM_8877-mMC002728	2.05924	1.84241	1.50069
Sh3d19-NM_12059-mMR027246	2.05715	0.18494	1.7747
5630401D06Rik-No acc-mMC009454	2.05676	-0.0180967	1.44439
Tbx15-NM_9323-mMC019230	2.05566	0.244154	0.38669
5430432N15Rik-NM_172418-mMR030299	2.05358	0.523044	0.424263
BC031781-NM_145943-mMC015361	2.05237	0.301512	0.102528
1110012J17Rik-NM_172963-mMC012484	2.05095	-0.01879	1.43263
2310066E14Rik-XM_486159-mMC011203	2.0506	1.15838	1.36303
Tnip2-NM_139064-mMC008992	2.05039	0.733498	1.10621
Pomc1-NM_8895-mMC003727	2.0498	0.646892	1.35233
Skiip-NM_25507-mMR026944	2.04968	0.431545	0.795369
BB128963-NM_172742-mMC007072	2.04871	0.505695	1.4244
Jph1-NM_20604-mMC010058	2.0474	-0.347127	-1.59934
5830444F18Rik-No acc-mMC003581	2.04682	0.332978	-0.109712
Serpina3c-NM_8458-mMC001019	2.04472	0.0918753	1.9225
1700065O13Rik-XM_128550-mMC008141	2.04468	-2.44844	0.0342292
1700006D18Rik-No acc-mMC008723	2.04441	-0.104142	0.382127
AW050020-NM_172943-mMC011503	2.04383	-0.525458	-0.103609
Scnn1b-NM_11325-mMC008101	2.04209	0.646576	-0.517709
Ptpn11-NM_11202-mMC023487	2.04066	0.833942	0.631131
1700017I11Rik-NM_25491-mMC007805	2.04061	0.690389	1.40521
Afmid-NM_27827-mMC020293	2.0405	0.457435	0.952194
9530043G02Rik-NM_175426-mMC012978	2.03945	0.568518	1.14044
Acp5-NM_7388-mMC011944	2.03914	0.0807963	0.478191
D430001F17Rik-No acc-mMC021378	2.03902	1.0302	1.62543
5730409K12Rik-No acc-mMC016093	2.03889	0.117624	0.611849
D12Ertd647e-NM_26790-mMC007149	2.03885	1.73855	0.703249
A730032D07Rik-XM_194983-mMC010002	2.03857	-0.494715	1.47865
Atp5b-NM_16774-mMC006983	2.03681	1.06691	0.74576
Slc25a10-NM_13770-mMC007849	2.03628	1.27979	-0.69356
Wdr23-NM_133734-mMC010026	2.03606	0.174505	0.825978
9430023B20Rik-NM_177595-mMC015778	2.03583	0.432315	0.293674
4930414N08Rik-No acc-mMC015485	2.03576	1.19387	1.20709
Rac3-NM_133223-mMC004764	2.03243	0.659531	-0.465216
0610040F04Rik-No acc-mMC023946	2.0323	-0.0508083	0.339766
Scgb3a2-NM_54038-mMC015338	2.03169	0.54326	-1.29928
Snx5-NM_24225-mMC001925	2.03128	-0.115404	1.5707
1810008O21Rik-XM_485868-mMC009080	2.03049	0.620824	-1.73051
Sec63-NM_153055-mMC010704	2.0296	-0.00188154	-0.160561
2610024B07Rik-No acc-mMC013884	2.02956	0.378582	0.19184
Pink1-NM_26880-mMC007565	2.02857	0.6021	1.01379
A630049H14Rik-No acc-mMC002372	2.02733	0.0446642	-0.0990061
Hapln4-NM_177900-mMC004494	2.02725	-0.217008	2.42298
4930488P18Rik-No acc-mMC003822	2.0272	-0.114942	0.92765
9430006E15Rik-No acc-mMC016655	2.02698	-1.58154	-1.27149
Gabbr1-NM_19439-mMC008452	2.02648	-0.552234	-0.559875
Stard10-NM_19990-mMC006251	2.026	0.561777	1.4444
Il3-NM_10556-mMC011263	2.02532	-0.161951	0.650208
Cyp39a1-NM_18887-mMC010016	2.02474	-0.905872	-0.035036
H2-M10.1-NM_13544-mMC001740	2.02467	-0.379925	-0.395447
4930548H24Rik-NM_26296-mMC008562	2.02462	0.764109	0.555934
4930554H23Rik-No acc-mMC006755	2.02347	0.406874	0.470111
4930456K20Rik-No acc-mMC011332	2.02306	-0.170307	-0.705427
Shc3-NM_9167-mMC011180	2.02296	0.714606	0.82251
BC054059-NM_145635-mMC016146	2.02166	-0.261907	0.384783
4932416A11Rik-NM_147776-mMC002738	2.02148	0.0276664	0.672322
C430049A07Rik-No acc-mMC008193	2.02126	-0.168564	0.626791
2310033P09Rik-NM_24210-mMC005483	2.02023	-0.151185	-1.14392
Stx5a-NM_19829-mMC008682	2.01979	0.349904	0.571419
Atcay-NM_178662-mMC004503	2.0186	0.665827	0.724346
Ngfg-NM_8693-mMC021679	2.01595	0.752186	1.00007
Zc3hdc1-NM_172893-mMC016180	2.01575	-0.34964	-2.13457
Prss8-NM_133351-mMC010152	2.01358	-0.414976	0.195748
2010110M21Rik-NM_25933-mMC011389	2.01094	-0.308935	0.658681
Slitrk2-XM_205324-mMC014354	2.01047	0.42214	0.607366
Pank2-NM_153501-mMC017221	2.00992	0.0226989	0.446058
A930035D04Rik-No acc-mMC000812	2.00954	0.157988	-3.52677
0610040J01Rik-NM_29554-mMC002416	2.00874	-0.227479	0.149347
Capn1-NM_7600-mMC002667	2.00742	0.180817	0.207871
5330439C02Rik-XM_484070-mMC004271	2.00708	0.623435	1.67343
Cdca4-NM_28023-mMC001930	2.00619	-0.261761	1.11428
D030041H20Rik-No acc-mMC014989	2.00491	0.280465	0.437168
IGKV13-62-1-AJ132672-mMO036442	2.00242	0.628798	-0.805458
Olfr770-NM_146863-mMC014597	2.00215	-0.55398	-0.948447
2900057B20Rik-No acc-mMC015055	2.00213	-0.569293	-0.717299
2010003K15Rik-No acc-mMC020773	2.00204	0.701108	1.22781
Apoc3-NM_23114-mMC024309	2.0006	2.20968	1.73476
Tcfe3-NM_172472-mMC002857	2.00039	-0.366092	-1.77228
Notch3-NM_8716-mMC008201	2.00026	1.20253	0.617802
Rab18-NM_11225-mMC018203	1.99982	-0.15757	0.757896
Ppia-NM_8907-mMC019688	1.99967	0.0665791	2.4117
Lrrc10-NM_146242-mMC008476	1.99694	-0.0515801	-0.370713
Tmod4-NM_16712-mMC016927	1.99623	-0.596997	0.594186
Apcs-NM_11318-mMC016357	1.99582	1.17618	2.23625
9530083O12Rik-No acc-mMC004729	1.99521	-0.241673	-0.535888
Cfdp1-NM_11801-mMC024815	1.99487	-0.319975	0.326494
Cxcl16-NM_23158-mMC012174	1.99324	0.373427	1.05518
AK122525-NM_199028-mMC003193	1.99321	0.15451	0.696837
2010001M06Rik-No acc-mMC007148	1.99288	0.976463	0.712616
4930538D17Rik-NM_29186-mMC007892	1.99284	-0.10262	0.843265
Parva-NM_20606-mMC011342	1.99253	0.0105981	0.163446
Il1b-NM_8361-mMC010962	1.9919	0.39997	0.429668
Rassf5-NM_18750-mMC007200	1.99058	0.329553	0.224542
8030479D07Rik-No acc-mMC008096	1.98933	-0.225278	0.121957
Mlh3-XM_484162-mMC013895	1.98931	-0.11318	1.33012
4731420N21-No acc-mMC011114	1.98818	-1.15379	-0.673603
Psmb10-NM_13640-mMC007644	1.98809	0.523886	0.869626
D630003K02Rik-NM_177216-mMC011412	1.98666	0.186664	-0.442455
Cno-NM_133724-mMC001580	1.98654	-0.132808	0.706118
Pdap1-XM_132501-mMC010695	1.98596	0.935836	1.09449
Sox2-NM_11443-mMC010494	1.98546	0.333412	1.25302
Acaa2-NM_177470-mMC006360	1.9853	-0.111011	1.80162
Cacna2d2-NM_20263-mMR030463	1.98513	0.185863	1.53216
Wsb2-NM_21539-mMR030420	1.98506	-0.229553	0.702295
1810044D09Rik-No acc-mMC004607	1.98489	0.854479	0.999512
9230106D20Rik-NM_177792-mMC008304	1.98481	1.60484	0.42829
Hivep3-NM_10657-mMC006259	1.98477	-0.20131	1.83731
Kcnq1-NM_8434-mMC012916	1.98329	0.661528	1.22415
E130101E03Rik-No acc-mMC010903	1.98218	1.17487	-0.359743
LOC260408-NM_153172-mMC009103	1.98197	0.692296	0.833786
Spry4-NM_11898-mMC013727	1.98124	0.528721	0.437344
Twist2-NM_7855-mMC011604	1.98075	0.234842	0.447229
Vps45-NM_13841-mMC006933	1.97984	1.08608	-0.280761
C1qtnf4-NM_26161-mMC011685	1.97788	0.108426	0.0734212
Lancl1-NM_21295-mMC009604	1.97749	-0.481311	0.303365
Fancd2-XM_132796-mMC015803	1.97724	0.298442	0.776996
V1re1-NM_134190-mMC009902	1.97617	-0.298057	1.1953
Cyp8b1-NM_10012-mMC010614	1.97613	0.0894161	0.591945
Chml-NM_21350-mMC009653	1.97504	1.13923	0.858345
Myh10-NM_175260-mMC014201	1.9735	-0.0664762	1.59136
Smbp-NM_133352-mMC015624	1.97214	0.668154	0.0771814
9630056G07Rik-No acc-mMC016973	1.97213	0.0738702	-0.103473
Epb7.2-NM_13515-mMC009083	1.97183	-0.404448	0.275663
Edem1-NM_138677-mMC011553	1.97105	0.614559	1.2895
Nt5m-NM_134029-mMC021402	1.97055	0.612158	0.488119
Rpl39-NM_26055-mMC021754	1.97028	0.341065	0.27713
4930403N07Rik-No acc-mMC009429	1.97005	0.195932	1.36186
Gla-NM_13463-mMC006900	1.9698	-0.275157	-0.217247
Scnn1a-NM_11324-mMC005022	1.96942	-0.301259	0.79576
Esd-NM_16903-mMC003898	1.96775	-0.642587	0.746406
6430571L13Rik-NM_175486-mMC012002	1.96772	0.196576	2.0912
Olfr403-NM_207622-mMC021207	1.96504	0.854812	0.177748
4933407H18Rik-XM_132005-mMC005606	1.96425	0.27916	1.27217
Sas-NM_25982-mMR030484	1.96411	-0.209867	0.452677
Bag3-NM_13863-mMC002691	1.96357	-0.392092	-0.271186
Ubn1-XM_489503-mMC008990	1.96353	-0.208766	-1.37083
Magea3-NM_20017-mMR030968	1.96339	0.506143	0.415816
Suclg1-NM_19879-mMC010859	1.96324	0.240035	0.306041
6330404F12Rik-No acc-mMC005982	1.96315	-0.275299	-0.493485
D4Ertd196e-NM_25667-mMC008869	1.96252	2.47369	1.29417
Tra1-NM_11631-mMC011679	1.96238	0.74297	1.32769
Rab15-NM_134050-mMC005041	1.96074	0.278826	-1.14604
D2Ertd217e-No acc-mMC010345	1.96049	1.59172	1.55333
LOC260345-No acc-mMC022473	1.95951	0.699609	0.635806
1700006H02Rik-NM_173367-mMR027322	1.95893	0.454787	1.07951
4732495E13Rik-XM_128300-mMC015700	1.95828	-0.629797	-0.738542
Btg1-NM_7569-mMC009498	1.95387	0.940461	0.998441
Mmp9-NM_13599-mMC015945	1.95372	-0.0253025	0.533256
Ddx24-NM_20494-mMC009832	1.9508	-0.102878	0.299495
Gabpb1-NM_10249-mMC012530	1.94934	-0.054331	0.847372
Fgl1-NM_145594-mMC007997	1.94838	0.995145	1.11922
4921517J08Rik-XM_128768-mMC014695	1.94806	0.0211636	0.442095
Acmsd-No acc-mMC003445	1.94752	-0.410779	0.450204
H47-NM_24439-mMC015325	1.94714	0.722425	0.99899
Dpysl2-NM_9955-mMR029582	1.94553	-0.317337	0.958739
E130013N09Rik-XM_488964-mMC011194	1.94498	0.753266	1.10944
D630041K24Rik-XM_126935-mMC006752	1.94487	0.039659	1.21369
Gal3st4-XM_284152-mMC020809	1.94325	-0.332079	-0.512516
C330006P03Rik-No acc-mMC015629	1.94294	0.0706261	0.653758
Thumpd1-NM_145585-mMC013462	1.9419	-0.316319	0.538909
Cdk2-NM_16756-mMC009612	1.94144	0.858583	0.302425
Olfr1342-NM_146713-mMC015768	1.94082	-0.6797	0.0656678
Thra-NM_178060-mMC024601	1.93958	-0.029433	1.24761
AI591476-NM_173406-mMC011821	1.93888	0.27728	0.582075
6530407C02Rik-NM_133853-mMC010638	1.93884	0.102869	0.927383
Shbg-NM_11367-mMC003907	1.93812	-0.0809763	-0.485695
Ighmbp2-NM_9212-mMC013798	1.93646	-0.161723	0.842567
2900064K03Rik-No acc-mMC011264	1.93548	0.223012	-0.264959
Lrsam1-NM_199302-mMC021793	1.93467	0.490806	-0.210686
C630035N08Rik-NM_175427-mMC011778	1.93456	-0.0615408	1.07567
D130076A03Rik-No acc-mMC016768	1.9343	-0.687348	-1.04077
D130004A15Rik-No acc-mMC002751	1.93363	0.933095	0.512436
Gng5-NM_10318-mMC011352	1.9336	0.537757	0.8897
4833427F10Rik-No acc-mMC014688	1.9336	0.943371	0.811476
BC028528-NM_153513-mMC006746	1.93322	-0.0919861	0.410337
Aldh6a1-NM_134042-mMC006965	1.9327	-0.0618745	0.353206
Dusp2-NM_10090-mMC014277	1.93262	1.06302	0.944508
Spa17-NM_11449-mMC015919	1.93146	0.0304718	-0.502682
Itk-NM_10583-mMC008330	1.93136	0.715946	1.4918
Fin14-No acc-mMC008773	1.93105	0.211478	0.274468
A430057M04Rik-NM_176925-mMC007927	1.93093	0.434341	0.202467
Snrp116-NM_11431-mMC005673	1.92956	0.531476	0.121604
Rshl1-NM_31255-mMC007828	1.92925	1.35469	0.767846
C130022K22Rik-NM_172730-mMC010760	1.92778	-0.511005	0.330603
A630055G03Rik-No acc-mMC015858	1.92745	2.50774	0.742159
1110031B06Rik-NM_144521-mMC012837	1.9274	-0.156618	0.0759783
Ccr7-NM_7719-mMC009456	1.92709	-0.750826	0.0831306
Kntc2-NM_23294-mMC009721	1.92694	1.23183	0.569526
Ccl22-NM_9137-mMC010939	1.9255	0.822128	-0.108807
Irx3-NM_8393-mMC009325	1.92513	-1.29147	0.878397
A930003A15Rik-No acc-mMC009854	1.924	0.469744	0.331752
Srpx2-NM_26838-mMC025958	1.92351	-0.332417	1.26916
8430411H09Rik-NM_26813-mMC010688	1.92326	0.0227386	-0.199403
Gpr43-NM_146187-mMC017511	1.92274	-0.370872	-0.273566
Slc26a4-NM_11867-mMC011220	1.92232	0.215891	0.922427
Kin-NM_25280-mMC008151	1.92221	0.108838	-0.127349
1700025E21Rik-NM_29373-mMC007098	1.92211	-0.747253	-0.0535709
Hk1-NM_10438-mMC010219	1.92094	0.742845	0.414068
AI505012-No acc-mMC015777	1.92049	0.329073	0.45733
Cfh-NM_9888-mMC009912	1.92049	0.24092	0.612776
2900054C01Rik-No acc-mMC010237	1.91989	1.39126	0.186806
Acsl4-NM_19477-mMR030982	1.91947	-0.213615	-0.241717
Ccl17-NM_11332-mMC018219	1.91932	-0.105368	0.286854
A130033B22-NM_177825-mMC014052	1.91928	-0.472046	-0.186709
Usp21-NM_13919-mMC009820	1.91773	0.685715	1.39249
2410195B05Rik-NM_30241-mMR030289	1.91764	0.776576	1.46081
2300003C06Rik-NM_28001-mMC004468	1.91746	0.826631	0.920268
Ccl9-NM_11338-mMC011417	1.91604	0.778599	1.23424
1110008L20Rik-NM_28643-mMC006052	1.91537	-0.540626	0.0803551
2400009B08Rik-XM_358687-mMC004496	1.91532	0.765299	0.430835
2010012O05Rik-NM_25563-mMC011957	1.91251	-0.138761	-2.01128
1110033L15Rik-No acc-mMC019731	1.91235	0.0716621	0.0262748
2700033H19Rik-No acc-mMC013075	1.9116	0.707201	1.33591
Ppm1g-NM_8014-mMC014174	1.91084	1.1023	0.934129
2900064A13Rik-NM_133749-mMR027766	1.91076	-0.29137	0.209623
Polr2k-NM_23127-mMC003874	1.90807	1.22471	-1.01535
Fbxl10-No acc-mMC014980	1.90802	0.257641	-1.02039
Hdgf-NM_8231-mMC021033	1.90781	1.10195	1.90659
Abcg4-NM_138955-mMC008938	1.90767	0.485497	0.995947
Rps17-NM_9092-mMC020092	1.90727	1.77667	1.71785
D930030D11Rik-NM_177281-mMC016379	1.90633	-1.01492	-0.667402
9330133O14Rik-NM_176948-mMC002056	1.90625	0.312039	0.880473
D430019H16Rik-No acc-mMC014222	1.90606	0.494878	0.657797
Alox12e-NM_145684-mMC004594	1.90566	0.468588	-0.198166
Gtf2f1-NM_133801-mMC020320	1.90515	0.52703	1.1763
Cyln2-NM_9990-mMC010765	1.90502	0.81071	-0.421849
Nppc-NM_10933-mMC001706	1.90422	0.417823	1.13297
1110031I02Rik-NM_25402-mMC010756	1.9036	-0.128531	0.446555
Rrm2-NM_9104-mMR030189	1.90335	0.790998	0.876188
1700009N14Rik-XM_131323-mMC010206	1.9031	0.018231	0.943269
Krt2-7-NM_33073-mMC008163	1.90113	0.877971	0.857064
Msx1-NM_10835-mMC007940	1.90088	-0.442295	-0.599834
Syt3-NM_16663-mMC009147	1.90076	0.832417	1.27674
4930455M05Rik-No acc-mMC011053	1.89989	-0.0823565	0.483405
Gm169-NM_199301-mMC022546	1.89867	0.568483	0.112353
Tenc1-NM_153533-mMC011100	1.89727	0.19947	0.586456
Fv1-NM_10244-mMC012107	1.89682	-0.399968	0.258774
5730585A16Rik-No acc-mMC008692	1.89553	1.21836	1.11528
C1d-NM_20558-mMC013688	1.89538	-0.0768743	0.435704
2600016J21Rik-NM_133744-mMC012486	1.895	-0.630556	0.564877
Igk-C-No acc-mMR029494	1.89291	0.421208	0.571918
Mat1a-NM_133653-mMC011043	1.89271	0.801482	0.991956
A530028O18-No acc-mMC012066	1.89175	-0.704553	0.245744
Lipc-NM_8280-mMC016229	1.89154	0.632102	-0.716559
1700001F22Rik-NM_27036-mMC011147	1.89094	0.633548	-1.4375
Crlz1-NM_23054-mMC010033	1.89074	0.615224	0.477445
A630074N13Rik-No acc-mMC009834	1.89023	0.388817	0.237689
Cdh4-NM_9867-mMC023798	1.8901	0.849277	1.41802
Dock11-XM_486647-mMC011318	1.88919	0.691661	1.32892
Slc5a2-NM_133254-mMC012285	1.88919	0.0535148	1.23397
1700058C01Rik-NM_175198-mMC010785	1.88902	0.570219	0.68835
Akap2-NM_9649-mMC003105	1.88821	0.795531	-0.155211
Upk3b-NM_175309-mMC003632	1.88708	0.591566	0.830868
Rgs3-NM_19492-mMC002514	1.887	0.214998	-0.253936
Rab6b-NM_173781-mMC022311	1.8862	0.945196	0.735193
1700034O15Rik-XM_110591-mMC013261	1.88605	0.910606	0.422225
3526401B18Rik-No acc-mMC007077	1.88495	-0.533744	0.240855
9930013L23Rik-NM_30728-mMC007935	1.88494	0.257165	0.922553
Nfkbib-NM_10908-mMC008604	1.88411	1.40669	1.27075
Def8-NM_54046-mMC014662	1.88267	-0.757134	1.40714
Zfp294-XM_128374-mMC015597	1.88263	0.547973	0.459147
Dctn5-NM_21608-mMC007877	1.88219	0.572133	0.321084
1700095J07Rik-No acc-mMC009363	1.88143	0.694257	0.896051
4930483P17Rik-No acc-mMC012091	1.88139	0.0418285	0.481365
C130023A14Rik-No acc-mMC005995	1.88109	0.733939	-2.28685
2610524A10Rik-NM_28258-mMC025890	1.88086	0.379967	1.42873
1700019D03Rik-NM_144953-mMC016199	1.88076	0.225591	1.16903
Kifc5b-No acc-mMR029171	1.88075	0.706748	0.583632
1700023D08Rik-No acc-mMC009668	1.88073	0.699704	-1.97794
Bpil1-NM_25631-mMC003985	1.88045	1.67768	0.493536
9130009M17Rik-No acc-mMC013638	1.88033	0.554485	-0.429425
Fkbp1a-NM_8019-mMC011477	1.87976	-0.314303	-0.296943
9130207N01-NM_177605-mMC014025	1.87917	-0.155661	0.74147
Hfe-NM_10424-mMC011013	1.87883	0.765969	0.203497
6430517E21Rik-NM_207583-mMC012716	1.87864	0.675825	0.442558
Actl6a-NM_19673-mMC023970	1.87846	-0.197058	0.0906527
H2-Q8-NM_23124-mMC022598	1.87834	0.531808	0.519175
4930500F10Rik-No acc-mMC012497	1.87807	-0.105778	1.07574
E2f7-NM_178609-mMC002076	1.87806	0.619933	0.451001
1700084E18Rik-No acc-mMC012032	1.87736	0.732099	1.07373
Ctsz-NM_22325-mMC003875	1.87671	1.75979	-1.01421
Fnta-NM_8033-mMC016633	1.8761	0.484504	0.971691
Hexa-NM_10421-mMC016448	1.87576	-1.81426	0.0211673
2310066I10Rik-XM_284376-mMC017323	1.87564	0.144721	0.848596
Birc7-XM_283820-mMC005642	1.87541	0.425817	0.127273
Chchd1-NM_25366-mMC011407	1.87469	0.0516323	0.942627
Tec-NM_13689-mMC014853	1.87425	0.501198	0.794401
Olfr156-NM_19474-mMC014234	1.87287	-0.227206	0.604979
5730509C05Rik-NM_197940-mMC001606	1.87254	0.265832	0.628365
A730091E23Rik-No acc-mMC008927	1.87221	1.34009	0.791888
C530050I23Rik-No acc-mMC011773	1.87153	0.29658	0.707629
Epb4.1l1-XM_487678-mMC004495	1.87151	0.688082	-0.0850751
Tbc1d13-NM_146252-mMC009684	1.87094	0.590941	1.11843
Tsc1-NM_22887-mMR027095	1.87029	1.41408	1.67809
Fth1-NM_10239-mMC023190	1.86934	1.07588	1.69409
Gabt4-NM_172890-mMC011608	1.86894	0.70455	0.811838
Rbpms2-NM_28030-mMC010865	1.86871	-0.574174	0.12832
3010027C24Rik-No acc-mMR029826	1.86853	0.814372	1.50243
Ezh1-NM_7970-mMC005895	1.86848	0.163562	0.775031
Lrp4-NM_172668-mMC013144	1.86812	-0.298267	0.627183
1700058P15Rik-No acc-mMC008844	1.86767	0.413756	0.90696
Apoe-NM_9696-mMC020085	1.86765	1.59929	1.68425
Cd79b-NM_8339-mMC016328	1.86707	-0.496891	-0.0946651
Igl-V1-No acc-mMC004215	1.86613	0.861939	-2.67956
Phf15-NM_199299-mMC007382	1.86576	1.20194	-1.32705
Olfr29-ps1-No acc-mMC009524	1.86562	-0.152984	-1.75208
Cxcr3-NM_9910-mMC016480	1.86517	-0.033197	0.00968783
1810032O08Rik-NM_25472-mMC012449	1.86481	-0.104368	-1.11203
Dpagt1-NM_7875-mMC009502	1.86438	0.625772	-0.428975
Fbxw2-NM_13890-mMC014572	1.86427	-0.739999	-0.763228
Ars2-NM_31405-mMC017123	1.86251	-0.343281	-0.0649654
Olfr1402-NM_146275-mMC008194	1.86246	0.922015	-0.157778
AW822216-NM_178884-mMC010804	1.86166	-0.4902	-0.558759
Krt1-24-NM_16880-mMC005047	1.86131	0.2885	0.254156
Padi1-NM_11059-mMC002524	1.85894	0.752446	-0.267401
4930479M11Rik-NM_183108-mMC002205	1.85864	-0.393433	0.118736
mt-Nd4-No acc-mMR028315	1.85745	0.884783	1.4148
2700088M07Rik-No acc-mMC004270	1.85732	0.64969	0.204875
Ugt1a13-NM_201641-mMC022718	1.85646	0.108423	1.31661
1810065E05Rik-NM_27239-mMC010093	1.85576	0.0384267	0.695507
Cet1-No acc-mMC017012	1.85559	-0.717218	0.264234
4930537H20Rik-No acc-mMC009166	1.85509	0.155595	0.619695
Gpr49-NM_10195-mMC014654	1.85482	-0.839409	-0.438879
Mpv17l-NM_33564-mMC007519	1.85323	0.456064	1.47318
Penk1-NM_1002927-mMC000780	1.85097	0.444853	1.13353
Hpxn-NM_17371-mMC006636	1.85058	2.23955	2.56775
Pdcd2-NM_8799-mMC013973	1.85003	0.651986	0.451576
Cspg5-NM_13884-mMC011589	1.84976	0.613116	1.49767
Fthfd-NM_27406-mMC008422	1.8496	0.606164	0.125476
Cyp3a44-NM_177380-mMR027240	1.8489	1.08478	1.18971
Hcngp-NM_20483-mMC012653	1.84878	0.501978	1.30867
6330509G02Rik-NM_172946-mMC013823	1.84812	0.891899	0.807187
Tle3-NM_9389-mMC014245	1.84719	0.359604	0.679976
BC060615-NM_198423-mMC022556	1.84703	0.705511	0.796646
2310075G12Rik-NM_27162-mMC015685	1.84701	0.345678	0.943934
4921517L17Rik-XM_130609-mMC014117	1.84483	-0.182331	0.0962611
9430014N10Rik-No acc-mMC006670	1.84409	-0.568917	0.563953
Mkl1-NM_153049-mMC012410	1.84325	0.121613	-0.424661
9630054F20Rik-NM_173784-mMC016816	1.84048	-0.628297	-0.282852
Tgm1-NM_19984-mMC010514	1.84013	0.394987	1.61576
5530402G07Rik-No acc-mMC015470	1.83955	-0.0793713	0.981505
Parvg-NM_22321-mMC015443	1.83946	0.573538	1.54085
Gpx7-NM_24198-mMC016739	1.83945	-0.153058	-0.397892
2200002K05Rik-XM_134642-mMC010949	1.83921	-0.416808	0.56267
Sncg-NM_11430-mMC002337	1.83715	1.40628	0.81619
Kelchl-NM_145479-mMC002839	1.83574	0.527845	0.500824
Capn12-NM_21894-mMC006969	1.83568	0.370658	0.850628
Sec8l1-NM_9148-mMC011873	1.83541	-0.354737	0.852286
4833438C02Rik-No acc-mMC010327	1.83516	0.292537	0.469877
1700013N06Rik-No acc-mMC012431	1.83342	0.00616032	0.465202
E030049G20Rik-NM_172484-mMC017014	1.83303	0.055279	0.346647
Nme6-NM_18757-mMC010443	1.8324	-0.0380627	0.243937
Leap2-NM_153069-mMC004237	1.83192	1.04674	0.324662
Hint2-XM_143732-mMC008110	1.8316	0.404603	0.481008
Kirrel1-NM_130867-mMC009598	1.83057	0.548834	-0.143356
Eef1a2-NM_7906-mMC011403	1.82776	0.774489	2.00586
Grim19-NM_23312-mMC012390	1.82772	0.131672	0.776056
1700007L07Rik-No acc-mMC003390	1.82641	0.613016	0.432999
2610511E22Rik-NM_29649-mMC006970	1.82608	0.943837	0.212263
Olfr702-NM_146597-mMC006775	1.82551	0.118416	1.25649
Dm15-NM_32418-mMC006754	1.82535	0.384014	0.774493
Afg3l2-XM_128950-mMC005146	1.82481	0.769969	0.864641
Ldh1-NM_10699-mMC025665	1.82414	0.833798	0.513095
E430012K20Rik-XM_130845-mMC008991	1.82394	0.843109	0.790887
Tnfsf14-NM_19418-mMC014741	1.82384	0.481089	0.455359
37135-NM_17461-mMC021903	1.82306	1.40359	-0.0200581
Gsta3-NM_10356-mMC011094	1.82217	1.07334	0.51172
Tada3l-NM_133932-mMC009697	1.82022	0.11901	-0.565881
6030419C18Rik-NM_176921-mMC005573	1.81992	0.478834	0.677081
C1qtnf3-NM_30888-mMC011987	1.81987	0.317377	0.769081
1700104L18Rik-No acc-mMC015596	1.81936	0.782349	0.983981
Lypla3-NM_133792-mMC002371	1.81892	0.523014	0.289284
Pfdn2-NM_11070-mMC020168	1.81812	0.561534	0.939275
Tcfap2c-NM_9335-mMC023463	1.81767	0.0127962	0.752981
2010308F09Rik-No acc-mMC013056	1.81494	0.53238	0.575623
Slc35d2-NM_1001321-mMC002422	1.81389	-1.58688	-0.544329
Olfr1216-NM_146893-mMC011544	1.81386	-0.096129	-1.43639
Fdps-NM_134469-mMC003339	1.81342	0.0298866	0.865731
Zp1-NM_9580-mMC014310	1.81274	0.799182	0.764207
C330022C24Rik-No acc-mMC011644	1.81266	-0.276116	1.04124
BC060631-NM_177700-mMC011913	1.81155	0.272563	0.111692
Cyld-NM_173369-mMC011824	1.81105	0.499737	1.11784
9830132G07Rik-NM_172643-mMC014778	1.81036	-0.0976957	-0.178227
4931406O17Rik-XM_486260-mMC002177	1.81007	0.889349	1.30654
6330407A03Rik-No acc-mMC017312	1.81006	-0.428678	0.0088599
Irf2bp1-NM_178757-mMC009771	1.80842	0.637528	1.32365
Blmh-NM_178645-mMC013948	1.80799	-0.0840509	-0.242309
4921511H13Rik-XM_128377-mMC012419	1.80792	-0.268462	0.579601
Mrpl17-NM_25301-mMC022895	1.80646	0.624476	0.670468
Prdx4-NM_16764-mMC011049	1.80487	0.937808	1.31831
4930503E24Rik-XM_125917-mMC009769	1.8047	-0.419679	0.299175
2300009A05Rik-XM_204313-mMC014132	1.80454	0.233859	1.54923
1810073G14Rik-NM_26342-mMC010778	1.80343	0.271218	0.626169
2310039L15Rik-XM_196011-mMC010217	1.80318	0.90332	1.12947
A830012C17Rik-No acc-mMC016685	1.80256	-0.289906	-0.146937
Hrnr-NM_133698-mMC014147	1.80243	0.955176	0.256521
Coro1a-NM_9898-mMC011721	1.80237	0.162061	-0.298945
BC057079-XM_283973-mMC010383	1.80171	0.568537	1.13753
2310001H12Rik-NM_145563-mMR029942	1.80074	0.230848	0.48566
A830025M08-No acc-mMC011911	1.80049	0.245321	0.667133
Rps27-NM_27015-mMC021606	1.79981	-0.120906	1.77592
5730568A12Rik-NM_25689-mMC012634	1.79885	0.658958	1.14943
Serf2-NM_11354-mMC019925	1.79571	0.0704654	-0.351671
Acads-NM_7383-mMC016447	1.79561	0.628827	0.510407
Olfr13-NM_146652-mMC016382	1.79506	0.387448	0.00124267
Tm4sf5-NM_29360-mMC016145	1.79294	-0.575752	1.00393
Zim1-NM_11769-mMC003454	1.79288	0.648251	-1.20055
Dbr1-NM_31403-mMC017238	1.79262	-0.108408	0.438291
9430096G21Rik-No acc-mMC014263	1.79201	-0.208781	-0.378441
1700008D07Rik-XM_485969-mMC010741	1.7912	0.263849	0.656729
9430067K09Rik-No acc-mMC025466	1.7907	-0.116365	1.09272
Cpsf2-NM_16856-mMC012970	1.79026	-0.209457	0.661121
2410075B13Rik-NM_146059-mMC013259	1.78942	0.52739	0.402889
Ap3b2-NM_21492-mMC014742	1.78933	0.911429	0.883344
Pcx-NM_8797-mMC010907	1.78819	0.612407	1.67098
Sirt4-XM_485674-mMC013381	1.78686	0.423328	0.971673
Dnajc5-NM_16775-mMC015836	1.78626	0.00598904	0.842524
Herpud1-NM_22331-mMC014258	1.78402	-0.551814	0.747701
Mrpl24-NM_26591-mMC007498	1.78281	0.211244	0.545744
Kif2b-XM_126653-mMC003551	1.78244	0.953455	0.830287
1810043M20Rik-BC050871-mMR001434	1.78166	0.564482	1.27639
A930003K04Rik-No acc-mMC010071	1.78144	-0.0657558	0.792995
Rdh1-NM_80436-mMR030301	1.78131	0.263434	0.871416
1700034B16Rik-No acc-mMC017173	1.78129	-0.0301561	-0.424566
4933411K16Rik-No acc-mMC011029	1.78093	0.655747	0.118614
Gnat2-NM_8141-mMC003130	1.78051	0.747198	1.66399
B230209C24Rik-NM_177235-mMC003848	1.78037	-0.931857	-0.330095
Nctc1-XM_489213-mMC014605	1.78025	0.376513	0.554588
Map3k5-NM_8580-mMC010333	1.77969	1.63835	0.703977
B230315M08Rik-NM_170758-mMC015924	1.77888	-0.266057	0.617482
Aurkb-NM_11496-mMC000969	1.7782	0.122909	0.974868
Rpl27a-NM_11975-mMR027706	1.77792	0.218117	1.11723
1700016F23Rik-NM_29064-mMC014591	1.77787	-0.0942501	0.947899
Ank1-NM_31158-mMC004405	1.7773	0.860842	0.438098
Atpaf1-NM_181040-mMC017508	1.77678	-0.134463	-1.393
Tmem8-NM_21793-mMC011066	1.77611	0.629734	1.03284
D930030I03Rik-No acc-mMC009140	1.77493	0.695808	1.22077
B930086A06Rik-NM_177207-mMC008067	1.77305	0.675627	1.00298
1700060L04Rik-No acc-mMC014336	1.77289	1.27913	1.44287
4932439E07Rik-No acc-mMC011542	1.7725	0.428844	1.23895
Ear5-NM_19398-mMC011830	1.77236	1.07555	0.637249
Eya1-NM_10164-mMC016295	1.77216	0.312347	-0.289163
2300008B03Rik-NM_175106-mMC015372	1.77213	0.144073	0.428678
Hmga2-ps1-No acc-mMC024277	1.77145	0.957755	1.14615
9330136K24Rik-No acc-mMC017133	1.77126	-1.22882	0.982568
C030004G16Rik-No acc-mMC018892	1.77	0.198225	0.25511
Grb7-NM_10346-mMC005192	1.76984	0.318765	-0.190006
C030002N13Rik-NM_145550-mMC007195	1.76926	0.508714	1.08496
Hspa1b-No acc-mMC014394	1.76892	-0.0440177	0.595593
Tekt2-NM_11902-mMC008977	1.76886	0.727342	0.735452
Mrps18b-NM_25878-mMC001104	1.76868	-0.0180948	0.49696
Atf6-XM_129579-mMC005867	1.76782	0.00237027	-0.484907
1700042G07Rik-XM_149454-mMC011239	1.76446	0.725221	0.855836
Avpi1-NM_27106-mMC005176	1.76383	1.35497	1.02246
Cnnm1-NM_31396-mMC011996	1.76354	0.647706	0.701788
Ly6g6e-NM_1003720-mMC011127	1.76249	0.666488	1.08825
4732472I07Rik-XM_195168-mMC012792	1.76222	-0.143651	0.517711
9030024J15Rik-No acc-mMC013593	1.76172	0.708422	1.0776
1700019O17Rik-XM_484891-mMC006262	1.76146	-0.0149058	1.10659
4930570D08Rik-No acc-mMC003797	1.76074	-0.282577	-0.744177
9330128H10Rik-NM_175678-mMC014118	1.76032	-0.178156	-0.32484
Agc1-NM_7424-mMC012190	1.75907	0.533053	1.05364
Col4a2-NM_9932-mMC008904	1.75689	0.615291	1.21401
6030451C04Rik-No acc-mMC010248	1.75635	-0.130401	0.320104
Lhx2-NM_10710-mMC002376	1.75627	0.95536	0.817959
Scn3a-XM_141275-mMC002852	1.75534	-0.829421	-0.407049
6820424L24Rik-XM_144310-mMC007278	1.75495	0.583937	0.0454803
1700010L19Rik-XM_128462-mMC011423	1.75444	0.670395	0.975803
3010003L21Rik-NM_175404-mMC012076	1.75438	0.0920403	0.750555
Acy1-NM_25371-mMC008684	1.75329	0.513411	0.956803
Nfatc4-NM_23699-mMC005487	1.75296	0.569231	-0.884202
A930027K05Rik-NM_175556-mMC010015	1.75211	0.227556	-1.23211
A930019J01Rik-No acc-mMC005186	1.75	0.451112	0.930552
4930539N22Rik-No acc-mMC009243	1.74969	0.460071	0.392012
Mkrn1-ps1-No acc-mMC010051	1.74799	-0.537938	1.75794
5430413I02Rik-NM_19976-mMC012148	1.74743	-0.00756833	1.30655
Stard7-NM_139308-mMC006096	1.74695	0.368039	1.12204
2310021N16Rik-No acc-mMC008675	1.74669	-0.573213	0.0370112
Kif4-NM_8446-mMC005059	1.74656	0.728864	-2.18403
2810468N07Rik-No acc-mMC007970	1.74527	1.44023	0.418645
6030443O07Rik-XM_484809-mMC016765	1.74456	0.615292	0.366578
3300005D01Rik-XM_196166-mMC007114	1.74426	-0.173683	-0.0744149
Sdf2l1-NM_22324-mMC009603	1.74411	0.868588	0.775851
Ctbp2-NM_9980-mMC016406	1.74385	0.627662	0.162095
Mill1-NM_153749-mMC010261	1.74267	-0.303997	0.264549
4932418K24Rik-NM_172799-mMC007827	1.74141	0.755839	1.33875
1700019B01Rik-XM_133591-mMC007421	1.74126	1.71802	0.815196
4933430H15Rik-XM_135711-mMC009620	1.74084	-0.379998	0.995784
4930423B08Rik-No acc-mMC006065	1.74055	0.195023	-0.274351
Fez2-NM_199448-mMC015289	1.74024	-0.513624	-0.388083
Lrsam1-NM_199302-mMC019749	1.74019	0.807163	0.641597
H2-M11-NM_177635-mMC009762	1.73894	0.139282	1.23069
BC022713-NM_177761-mMC003442	1.73803	0.845414	0.51073
C030027H14Rik-No acc-mMC001868	1.73716	-0.0229316	0.450091
2810433D01Rik-XM_484087-mMC016284	1.73701	0.0989563	0.173285
Xrcc1-NM_9532-mMC011623	1.7361	0.997787	0.444752
Thrap4-NM_11869-mMC008687	1.73589	1.43141	0.148998
AK036573-No acc-mMR001486	1.73548	0.920628	-0.0184433
Ap4s1-NM_21710-mMC013278	1.73531	-0.246548	0.957251
BC037006-XM_109956-mMC010878	1.73477	-0.424443	-0.454161
0610040A22Rik-No acc-mMC008458	1.73466	-0.520916	-2.21517
C8a-NM_146148-mMC007020	1.73459	0.632974	0.850251
2600009E05Rik-XM_485067-mMC001025	1.73433	0.29413	0.264897
Kcnn2-NM_80465-mMC024399	1.73393	-0.209262	0.801361
A830054O07Rik-No acc-mMC002101	1.73368	-0.394869	1.26928
Slc35c1-NM_145832-mMC015951	1.73356	-0.359479	-0.489008
Ddx41-NM_134059-mMC002252	1.73347	0.569689	-0.152893
A730080H06Rik-XM_489054-mMC008212	1.73291	-0.319548	-0.597525
Olfr1301-NM_146887-mMC015961	1.73271	-0.34369	1.03106
Pace4-XM_355911-mMC002280	1.73249	0.43089	0.220331
3010023C09Rik-No acc-mMC012150	1.73243	0.728865	1.34424
Pcca-NM_144844-mMC009449	1.73236	1.17895	2.19822
E130304D01-NM_173403-mMR029221	1.7322	0.758191	0.508104
P2ry10-NM_172435-mMC006984	1.73115	0.841783	0.907871
D4Bwg0951e-NM_26821-mMC012327	1.72993	0.807809	1.76256
Sfrs2-NM_11358-mMC003820	1.72949	0.824122	1.5736
Lsm2-NM_30597-mMC005139	1.72934	-0.371504	1.23765
Ppp2cz-NM_27982-mMC001089	1.72913	0.381397	1.09557
Sntb2-NM_9229-mMC001141	1.72893	0.921393	0.85502
A930017N06Rik-NM_175522-mMC007672	1.7288	0.921668	0.690572
C630007C17Rik-XM_485015-mMC016887	1.72844	0.997463	0.678466
Mtx2-NM_16804-mMC004307	1.72837	-0.465995	0.439216
Vtn-NM_11707-mMC011626	1.72771	0.986789	1.26396
Sema6b-NM_13662-mMC015276	1.72752	0.800228	0.969639
Ccpg1-NM_28181-mMR027450	1.72698	-0.225264	0.411589
1700066B19Rik-No acc-mMC011032	1.72688	-0.314729	-0.0593252
Psmb9-NM_13585-mMC008677	1.72638	3.6447	0.6746
E130304I02Rik-No acc-mMC012414	1.72613	-0.205155	0.200423
Gbgt1-NM_139197-mMC003076	1.72594	-0.222887	0.936654
4930563J15Rik-No acc-mMC007182	1.72571	0.43863	0.496159
Ercc5-NM_11729-mMC016175	1.72526	0.456364	0.13795
Nr5a1-NM_139051-mMC003137	1.72506	0.675652	0.337619
Mcph1-NM_173189-mMC001745	1.72473	0.36048	1.02653
B230208N19Rik-No acc-mMC017720	1.72386	-0.444068	-0.753272
Paqr6-NM_198410-mMC020967	1.72319	0.823922	-0.516264
Mtap-NM_24433-mMC010994	1.72315	-0.0694897	0.367495
4833420D23Rik-No acc-mMC007960	1.72259	-0.22208	-0.273805
Cox8a-NM_7750-mMC022658	1.72258	-0.0818201	0.227309
AV216087-NM_144804-mMC012561	1.72179	0.173846	1.24616
Pck1-NM_11044-mMR029355	1.72173	0.691695	0.626297
1700015C15Rik-No acc-mMC013962	1.72173	-0.352572	0.745861
Xpo6-NM_28816-mMC013392	1.72148	0.408259	0.890017
Bpnt1-NM_11794-mMC009591	1.72092	1.13432	0.393787
Clstn1-NM_23051-mMC007765	1.72031	0.617261	0.968859
Glce-NM_33320-mMC021354	1.72008	0.532986	1.01765
Dio3as-XM_358428-mMC002626	1.71993	-0.229865	-0.616117
Kcnh1-NM_10600-mMC006526	1.71977	0.215592	2.47673
Pafah1b3-NM_8776-mMC007793	1.7188	0.840815	0.791389
Mgat5-NM_145128-mMC010233	1.71878	0.76655	0.804879
Abcd3-NM_8991-mMC009570	1.71857	0.177223	-0.911514
Dclre1b-NM_133865-mMC016422	1.71813	-0.604594	-0.318269
2600009P04Rik-No acc-mMC019860	1.71806	-0.183089	-0.820152
Usp3-NM_144937-mMC013851	1.71781	-0.473326	0.300301
2310005O14Rik-NM_26452-mMC009831	1.71758	-0.10756	0.130339
4930534B04Rik-NM_181815-mMC007938	1.71735	0.73071	1.15177
BC030183-NM_182783-mMC002961	1.71643	-1.29142	-0.0433845
2900089D17Rik-No acc-mMC014379	1.71527	0.375834	0.396124
Rbp1-NM_11254-mMC008631	1.71486	0.381679	0.615147
Sytl5-NM_177704-mMC004023	1.71385	0.477645	-0.53789
Trpc4ap-NM_19828-mMC001693	1.71231	1.23492	1.87062
2610034N15Rik-No acc-mMC005581	1.71094	-0.197349	0.296554
Thy1-NM_9382-mMC014510	1.71093	0.709865	1.01394
Arl6ip4-NM_144509-mMC010235	1.71087	0.92388	0.37814
Mrpl38-NM_24177-mMC001891	1.71033	0.688799	0.73387
4921534H16Rik-No acc-mMC012434	1.71006	0.0475619	0.786365
1110028F18Rik-No acc-mMC002174	1.70997	0.951909	-0.296092
Lass4-NM_26058-mMC004257	1.70971	1.19399	-0.556933
Kng1-NM_23125-mMC010135	1.70971	1.66562	2.79167
Mta1-NM_54081-mMC004335	1.70907	0.568786	0.456735
1110032D12Rik-NM_19770-mMR028701	1.70865	-0.444101	-0.0866796
AI132487-XM_127129-mMC009987	1.70819	0.39238	0.418589
Fbxo42-NM_172518-mMC022595	1.70746	-0.190144	-0.386424
Dph2l2-NM_26344-mMC014549	1.70744	-0.267608	-0.653278
Myo5a-NM_10864-mMC005221	1.70716	-0.6314	-0.730858
9630020C08Rik-NM_177797-mMC010370	1.70704	-0.0667022	-1.36644
Centg2-NM_178119-mMC016544	1.70689	0.00363019	-0.226541
En1-NM_10133-mMC010483	1.70622	-0.072007	-0.0792939
Sort1-NM_19972-mMC016759	1.70611	-0.0642369	0.556358
B230333C21Rik-XM_111900-mMC004816	1.70517	-0.547117	-0.632471
Pttg1ip-NM_145925-mMC008056	1.7051	1.31563	1.07502
mtDNA-completeGenome_275-mMO036082	1.70386	1.59397	1.52508
Rock1-NM_9071-mMC008843	1.70348	-0.273664	0.135266
Gnat1-NM_8140-mMC008630	1.70329	0.524033	0.510439
C130086A10-NM_173746-mMC002789	1.70328	0.73383	0.761789
Zfp184-NM_183014-mMC016114	1.70282	-1.43561	0.121861
Kl-NM_13823-mMC015040	1.70204	0.53783	-0.0128058
Olfr1302-NM_146889-mMC005958	1.7017	0.113754	-1.1238
Slc38a4-NM_27052-mMC021589	1.70162	0.396623	0.977493
1700039O17Rik-No acc-mMC006797	1.70119	0.212288	1.27361
Pax2-NM_11037-mMC002304	1.70097	1.08748	0.111188
4632407F12Rik-XM_110709-mMC014152	1.70071	0.341001	0.669874
1700030J22Rik-XM_134467-mMC009997	1.70062	0.679146	1.1053
Ywhab-NM_18753-mMC011385	1.70007	0.0391164	-0.33899
Habp2-NM_146101-mMC004854	1.70004	-0.436079	0.247498
Tdrd1-NM_1002238-mMC016442	1.69971	-0.0557374	-0.773843
4930430E16Rik-NM_28672-mMR026412	1.69952	0.910397	0.559805
4732460K03Rik-No acc-mMC016028	1.69854	0.475563	0.351923
Hand1-NM_8213-mMC007751	1.69845	0.249648	0.761959
Supt4h-NM_9296-mMC006071	1.69762	0.822983	1.53227
Lama2-NM_8481-mMC013182	1.69595	0.33764	0.386372
Bcl2a1a-NM_9742-mMR026458	1.69593	0.655672	0.639416
6330512M04Rik-NM_177265-mMC011313	1.6959	0.515849	0.570514
Casq1-NM_9813-mMC022151	1.69577	0.898135	1.30438
1190009E20Rik-No acc-mMC010136	1.69539	0.394969	0.00527305
Olfr284-NM_146281-mMC012487	1.69396	0.147445	0.696136
Ndst1-NM_8306-mMC015049	1.69386	0.727789	0.73272
Epb4.1l2-NM_13511-mMC016155	1.69321	0.719772	-0.229707
Hrasls3-NM_139269-mMC008450	1.69252	-1.56008	0.489521
4933429K18Rik-No acc-mMC012576	1.69231	-0.459998	0.766971
9030407H20Rik-NM_144805-mMC013897	1.69151	0.823651	0.142116
2310026J01Rik-NM_177845-mMC001829	1.69063	-0.350878	0.182147
AI118078-NM_172923-mMC006132	1.69046	1.37538	1.30778
Bin1-NM_9668-mMC012696	1.69035	0.118064	1.20329
Fut7-NM_13524-mMC008176	1.69016	-0.443179	-0.0494588
Ranbp9-NM_19930-mMC012319	1.68996	0.619004	0.562413
Pla2g2d-NM_11109-mMC015270	1.68829	-0.552522	-0.666328
4930542N06Rik-No acc-mMC012539	1.68763	-0.193803	-0.158556
1300017J02Rik-NM_27918-mMC012406	1.68651	0.527217	0.936098
Vangl1-NM_177545-mMC012804	1.68639	0.407809	0.696184
Ubxd1-NM_24432-mMC021742	1.68623	-0.258798	0.356184
2010004O20Rik-NM_22418-mMC009980	1.68572	0.418806	1.41728
Ring1-NM_9066-mMC005150	1.68496	0.263589	-0.650842
P2rx1-NM_8771-mMC005036	1.6848	0.888494	1.20973
Foxl1-NM_8024-mMC020796	1.68469	1.15799	0.602466
Tas2r116-No acc-mMC001884	1.6841	0.23534	-3.50218
2810406C15Rik-NM_146171-mMC002652	1.68397	-0.351415	-1.49782
2900078C09Rik-No acc-mMC003840	1.68369	0.857209	0.890868
Pdip-XM_128552-mMC002516	1.6831	0.555654	0.232376
D030060M11Rik-NM_146000-mMC002440	1.68235	-0.295156	1.4648
Gja5-NM_8121-mMC019907	1.68231	0.152268	0.475585
1110014K05Rik-NM_28622-mMC016594	1.68124	-0.0442442	1.25846
A430068E04Rik-No acc-mMC004285	1.68099	-0.0401036	-3.84921
C230082I21Rik-No acc-mMC019004	1.68057	-0.136034	-0.434029
2810410A03Rik-No acc-mMC014674	1.67973	1.11585	0.583306
Phgdhl1-No acc-mMC002339	1.67918	1.54772	0.473381
Muc3-XM_355711-mMC004837	1.67825	0.528089	1.05388
C630002B14Rik-NM_175331-mMC009775	1.67787	0.0344169	0.671929
Pkig-NM_11106-mMC023575	1.67786	-0.166465	1.35507
Rgl3-NM_23622-mMC015013	1.67729	0.753003	1.51541
Chrm3-NM_33269-mMC011603	1.67694	0.398463	-1.26903
Fbxl8-NM_15821-mMC008315	1.67648	0.947615	1.4321
1700094C09Rik-NM_24279-mMC017341	1.67416	-0.258196	0.552703
AI225934-No acc-mMC020130	1.67401	0.299476	0.0314696
Nrxn3-NM_172544-mMR028404	1.67243	0.333352	-0.194556
Adcy2-NM_153534-mMC007620	1.67226	0.680101	-0.845572
Psmd8-NM_26545-mMR030778	1.67201	0.725755	0.641211
Slc1a4-NM_18861-mMC013788	1.67175	-0.42454	-0.395308
Creld1-NM_133930-mMC009151	1.67034	0.317032	0.50204
Dsg1b-NM_181682-mMC024430	1.66989	0.742206	1.05032
D330022H12Rik-No acc-mMC004739	1.6698	-0.0906206	-0.51873
D4Bwg1540e-NM_26257-mMC013898	1.66968	0.327603	0.54276
Itm2b-NM_8410-mMC022062	1.66907	0.266918	0.488318
Es1-NM_7954-mMR031228	1.66902	0.696914	1.48702
F730002C09Rik-No acc-mMR029651	1.6674	0.583746	0.374066
Icam1-NM_10493-mMC012010	1.66721	-0.290497	0.802899
Tcrb-V8.3-No acc-mMC009986	1.66642	0.716454	0.0791098
5330428N10Rik-No acc-mMC012877	1.66622	0.468286	0.387831
Prm3-NM_13638-mMC007724	1.66571	1.08925	0.831314
4921525D07Rik-No acc-mMC002013	1.6656	1.36634	0.543397
4930557B06Rik-No acc-mMC015445	1.66551	0.294968	-0.693178
5430427N15Rik-No acc-mMC015876	1.66519	-0.494969	0.285259
Nudt8-NM_25529-mMC009382	1.66506	1.2829	-0.0174744
Fancl-NM_25923-mMC010981	1.66398	-0.528515	-0.0926598
Abcf1-NM_13854-mMC012661	1.6629	0.790768	1.11442
E230012P03-No acc-mMC010088	1.66149	-0.232796	-0.167273
Cic-NM_27882-mMC005368	1.66126	1.18268	-0.172786
2210404O07Rik-XM_125703-mMC015113	1.66089	1.33967	0.261225
Islr-NM_12043-mMC022446	1.65968	0.302713	1.55682
Upf3a-XM_356061-mMC011807	1.6595	1.06348	0.582369
Serpina1b-NM_9244-mMC023425	1.65929	2.04632	2.81001
Gm111-NM_207234-mMC007075	1.65894	0.677504	0.495694
Tcea2-NM_9326-mMC013007	1.65845	0.520428	1.08634
Ltbr-NM_10736-mMC002891	1.65738	-0.581715	-0.757867
Rpl9-NM_11292-mMC019931	1.65655	1.06733	1.18687
Gpd1-NM_10271-mMC009794	1.65602	-0.232831	0.223088
Dag1-NM_10017-mMC009509	1.65584	0.610875	1.03881
Olfr559-NM_147112-mMC018291	1.65526	-0.222623	1.1365
Olfr733-NM_146663-mMC008735	1.65457	0.369544	-0.69357
Tnfsf9-NM_9404-mMC015409	1.6535	0.776426	-0.492379
D630002J15Rik-XM_485742-mMC007410	1.65257	0.755768	0.46405
LOC238771-XM_484303-mMC013497	1.65249	0.83423	-0.443811
Dia1-NM_29787-mMC008019	1.65245	0.163647	1.13794
1700008A23Rik-No acc-mMC014918	1.65196	0.768606	0.465165
Pcdhgb7-NM_33579-mMR030020	1.6514	0.0996319	-0.0889071
Slc24a1-NM_144813-mMC016210	1.65092	-0.34586	0.255969
Tnxb-NM_31176-mMC009931	1.6507	1.20818	1.13536
A030003A19Rik-NM_173024-mMC016624	1.65068	0.926696	1.03146
C230040D10Rik-XM_356059-mMC011392	1.64979	-0.503371	-0.799629
Unc5cl-NM_152823-mMC023881	1.64925	0.28233	0.855842
P4hb-NM_11032-mMC009971	1.64909	0.458446	1.50768
AU016977-NM_175016-mMC012925	1.64873	0.0295612	-0.106351
4930461G14Rik-No acc-mMC004657	1.64842	0.447769	0.499169
Slc17a6-NM_80853-mMC004694	1.64822	0.870333	-4.05099
Cep2-XM_358344-mMC011205	1.64808	0.928996	1.3644
Cyp1b1-NM_9994-mMC012074	1.64697	0.532116	0.92963
2310004I24Rik-NM_25510-mMC013347	1.64576	0.622123	-0.303542
Atp6v1c1-NM_25494-mMC011964	1.64409	-0.396731	-0.330744
Cpsf1-NM_53193-mMC007526	1.64374	-1.00175	-0.576759
A230028O05Rik-XM_488773-mMC010787	1.64349	-0.771016	0.256679
Opn4-NM_13887-mMC015754	1.6432	0.227246	1.00993
Cyp1a2-NM_9993-mMC007693	1.64303	0.858706	0.817327
Gaa-NM_8064-mMC000781	1.64299	0.582446	-0.543124
B230378P21Rik-No acc-mMC010875	1.64289	0.365588	1.53576
1700125C05Rik-No acc-mMC014954	1.64252	-0.505603	-0.493389
Snx26-NM_178252-mMC024719	1.64252	0.84588	0.77142
D5Wsu46e-NM_144913-mMC011954	1.64143	0.523412	1.27746
C4-NM_9780-mMC019488	1.64001	-0.0435583	0.198826
4933416A02Rik-No acc-mMC001734	1.63932	0.268044	0.689118
5330423I11Rik-No acc-mMC012625	1.63925	-0.460805	0.572527
Tigd5-NM_178646-mMC013129	1.63922	-0.350443	0.550387
A530065E19Rik-NM_145433-mMC002155	1.63919	-0.126776	0.0113916
4930572K03Rik-No acc-mMC012030	1.63883	0.857087	1.91315
Pou2f3-NM_11139-mMC004235	1.63771	0.184143	1.26661
Catsper4-NM_177866-mMC008398	1.6373	-0.000684857	0.476789
2210404E10Rik-No acc-mMC005547	1.63664	-0.313307	0.207417
Mcm4-NM_8565-mMC016857	1.6366	-0.330824	0.336424
Psmc5-NM_8950-mMC009711	1.6363	0.437196	0.418234
Aoc2-NM_178932-mMC011872	1.63596	0.861598	1.06818
Exosc4-NM_175399-mMC010867	1.63584	0.891773	1.24893
1700063H04Rik-XM_132752-mMC011048	1.63551	-1.39766	-0.154613
Cfhl1-NM_15780-mMC021893	1.63439	1.09978	0.243801
Olfr970-NM_146611-mMC010241	1.63433	0.281079	-0.0296464
A030011M19-NM_177723-mMC011422	1.63406	0.558882	1.7488
Pthlh-NM_8970-mMC012429	1.63397	0.0957121	1.60976
Dhrs10-NM_25330-mMC014109	1.63395	0.806905	0.668083
1110017C15Rik-NM_25391-mMR030213	1.63299	-0.417782	-0.454345
6330583M11Rik-NM_24465-mMC002722	1.63279	0.939857	-0.965764
Irs1-NM_10570-mMC008279	1.63259	0.0793308	1.40851
Mapre2-NM_153058-mMC022818	1.63249	0.527411	-0.726823
Slc5a1-NM_19810-mMC015369	1.63198	-0.191078	0.000689866
Serpina1-No acc-mMR029672	1.63188	1.872	1.62578
Commd10-NM_178377-mMC015709	1.63183	0.896757	-0.0537803
Arid3a-NM_7880-mMC013234	1.63182	-0.511966	1.34579
1500005P14Rik-XM_133283-mMC008168	1.63177	-0.0214254	0.0181957
1700120K04Rik-NM_26628-mMC015214	1.6313	0.365399	0.440868
D19Wsu12e-XM_358328-mMC010707	1.63007	-0.061564	-0.674989
6530401C20Rik-NM_173405-mMR026228	1.62951	1.02437	0.995655
1700022N24Rik-NM_145355-mMC010716	1.62937	0.56443	0.342844
Tceb3bp1-NM_25852-mMC015456	1.62909	-0.0500525	0.432759
Hcn2-NM_8226-mMC002768	1.62904	0.520434	0.50732
Phxr5-NM_8836-mMR029860	1.62889	-0.269274	2.41185
Pdir-NM_28295-mMC014930	1.62885	0.691418	0.690789
Gfi1-NM_10278-mMC006029	1.62884	-0.0615596	0.70187
Surf5-NM_11513-mMC005297	1.6283	0.334958	0.462532
Targ1-No acc-mMR026763	1.62761	0.143936	0.983648
Cideb-NM_9894-mMC011287	1.6276	0.647431	1.53293
Bnip1-NM_172149-mMC016701	1.62751	-0.137752	0.165848
Cog8-NM_139229-mMC020162	1.62735	0.517626	1.27145
Sds-NM_145565-mMC012223	1.62606	0.345177	1.1171
BC046386-NM_181422-mMC007219	1.62585	0.310043	-0.991418
4930572J05Rik-NM_198607-mMC012280	1.62534	0.363278	0.0149719
A330023F24Rik-NM_177154-mMC016683	1.62483	0.195953	0.519123
Flg-No acc-mMC006918	1.6246	-0.278109	-0.108292
Gpr158-NM_1004761-mMC013869	1.62422	-0.309531	1.57617
Prkacb-NM_11100-mMC002548	1.62373	0.191812	-0.537199
6330548G22Rik-NM_29532-mMC012144	1.6235	0.221252	0.836147
Fosl2-NM_8037-mMC012724	1.62316	-0.309841	-1.24381
BC049697-NM_198673-mMC025032	1.62272	0.851463	0.425895
Pcdh21-NM_130878-mMC016470	1.62262	-0.458829	-0.834428
1810008A18Rik-NM_133998-mMC015743	1.62233	-0.431532	1.52194
Wdr5b-NM_27113-mMC014442	1.62205	-0.116909	0.621848
E130111B04Rik-No acc-mMC009761	1.62198	-0.07639	-1.68119
9430068D22Rik-No acc-mMC015941	1.62195	-0.326285	0.0342565
Sf3a1-NM_26175-mMC005388	1.62191	1.1832	-0.790492
A430110N23-NM_173008-mMC007437	1.62131	1.39324	1.08693
Dapk1-NM_29653-mMC013160	1.62097	-0.648343	0.142359
Tysnd1-XM_125636-mMC008143	1.62065	0.766992	0.53426
Rgn-NM_9060-mMC014694	1.62052	1.33291	0.701212
4930429O20Rik-NM_29025-mMC010739	1.62044	0.225256	1.30981
BC037703-NM_172295-mMC010213	1.6196	0.77524	0.925966
D830029L11-No acc-mMC005705	1.61901	0.523166	-1.01279
5730593N15Rik-NM_175263-mMC007251	1.61896	0.0857668	0.357191
Serpina4-ps1-No acc-mMC008583	1.61842	0.69831	-1.20462
Pgls-NM_25396-mMC014578	1.61838	0.767273	0.838325
Ndg2-NM_175329-mMC004812	1.61783	-1.26324	0.924776
Bcl11b-NM_21399-mMC010669	1.61781	0.607044	-0.908326
9130401L11Rik-No acc-mMC002350	1.61735	-0.216001	1.90753
4930415J21Rik-NM_177767-mMC011624	1.6171	0.631094	0.182778
Csrp1-NM_7791-mMC009756	1.6168	0.603083	1.54795
Rnps1-NM_9070-mMC015577	1.61653	-0.0372743	1.44314
Sumf2-XM_355742-mMC006666	1.61637	-0.172251	0.317295
Tslpr-NM_16715-mMC002723	1.61589	-0.0144928	1.06153
1700125H20Rik-XM_126139-mMC012960	1.61582	-0.375803	0.0758644
Hsd3b5-NM_8295-mMC005616	1.61558	0.616386	-0.168366
Dhrs1-NM_26819-mMC004619	1.61539	0.129085	0.349867
9230117E06Rik-No acc-mMC012810	1.61457	1.13746	0.989083
IGKV12-46-AJ235956-mMO036247	1.61434	0.456466	0.907191
E030024N20Rik-No acc-mMC013137	1.61399	0.0635146	-0.517074
Vax2-NM_11912-mMC013290	1.61393	1.86738	0.783887
Accn2-NM_9597-mMC011096	1.61268	-0.48217	-0.380039
A130022D17Rik-No acc-mMC015355	1.61169	-0.565202	1.74144
4921517J23Rik-XM_133714-mMC014350	1.61075	0.41118	0.0718447
Prrx2-NM_9116-mMC003788	1.6095	0.355117	-0.344932
B930071L05-XM_488696-mMC006341	1.60846	0.618591	1.11788
5730435O14Rik-No acc-mMC014012	1.60829	0.335754	0.325689
Mapk8ip3-NM_13931-mMC003355	1.60796	0.88235	-0.456656
A930015G24Rik-No acc-mMC002986	1.60761	0.399791	0.686322
5730438N18Rik-NM_27460-mMC002065	1.6068	0.235043	1.5608
Foxh1-NM_7989-mMC006680	1.60668	0.654247	0.972681
Nola3-NM_25403-mMC010726	1.60625	-0.186244	1.5029
AA536749-NM_12027-mMC012095	1.60613	-0.476923	0.079569
Fem1c-NM_173423-mMC013418	1.60612	1.02699	0.976852
P4ha2-NM_11031-mMC010183	1.60599	0.117415	0.805218
Prkaa1-XM_139298-mMC009596	1.60581	0.651096	1.39162
2810430P21Rik-No acc-mMC017293	1.60555	0.0183197	-0.268698
6330417K15Rik-No acc-mMC015089	1.60543	0.695467	0.791069
Duox1-XM_130483-mMC016142	1.60315	-0.0796719	-1.68176
Igsf6-NM_30691-mMC008506	1.60295	0.56744	1.21295
Trim29-NM_23655-mMC004777	1.60279	-0.00734296	0.180588
Hist1h2ai-NM_178182-mMC020106	1.60153	1.21757	0.20333
Rufy2-NM_27425-mMC022111	1.6012	0.622801	0.336148
2600001B17Rik-NM_172947-mMC022356	1.60002	0.125377	1.58321
Olfr568-NM_147091-mMC010840	1.59965	0.938605	0.967685
Mep1b-NM_8586-mMC011128	1.59899	0.515551	1.28561
2810026P18Rik-No acc-mMC012116	1.59855	0.107734	0.982464
Them2-NM_25790-mMC007380	1.5985	1.00477	-0.885315
Hoxa5-NM_10453-mMC016488	1.59746	0.236218	-0.411904
Tagln-NM_11526-mMC015024	1.59726	0.412621	0.704427
BC061928-NM_172861-mMR029357	1.59699	-0.431762	-0.576901
4732460I24-XM_489249-mMC006243	1.59643	0.774665	1.38572
Etv6-NM_7961-mMC008093	1.59602	1.13831	1.18969
Gga1-NM_145929-mMC014864	1.59555	0.455199	1.00583
A230053A07Rik-XM_144076-mMC008748	1.59551	-0.0151113	0.91972
9430069J07Rik-NM_213727-mMC012581	1.59513	0.206624	0.570307
Olfr270-NM_146607-mMC007496	1.5951	0.561335	1.27954
A330033J07Rik-No acc-mMC002551	1.59381	1.32417	1.36516
1700020C11Rik-NM_26443-mMC004399	1.59374	0.478437	0.48699
Cdo1-NM_33037-mMC023050	1.59288	1.03127	0.984047
C030015A19Rik-No acc-mMC003748	1.59231	-0.515489	-1.29666
Zfp358-NM_80461-mMC009803	1.59211	-0.0149422	0.581184
Nxph1-NM_8751-mMC006253	1.5897	1.16191	-0.549334
C130040J23Rik-No acc-mMC014726	1.5889	-0.280266	1.42848
Bdkrb1-NM_7539-mMC005235	1.58816	0.585623	0.169165
4930586N03Rik-No acc-mMC007210	1.5879	0.0710618	-1.50014
Cpe-NM_13494-mMC015127	1.58786	0.754154	0.997158
5330430P22Rik-No acc-mMC013388	1.58761	0.650462	1.38382
4933421A08Rik-No acc-mMC015085	1.58678	-0.148964	1.40842
D3Bwg0562e-NM_177664-mMC012990	1.58652	0.177107	0.186712
Aqp12-NM_177587-mMC012439	1.58627	0.75079	0.590292
Arrdc2-XM_134227-mMC004735	1.58625	-0.533156	-0.115301
B3galt5-NM_33149-mMC010130	1.5861	0.172831	0.852395
Axl-NM_9465-mMC012994	1.58552	0.824095	1.0132
Fxyd5-NM_8761-mMC010685	1.58482	-0.133726	-0.0996408
Cias1-NM_145827-mMC010489	1.58407	1.58495	1.41928
Trpm2-NM_138301-mMC014618	1.58334	0.467593	-0.31804
Tbx5-NM_11537-mMR027957	1.58252	0.684521	0.898994
1700029H14Rik-NM_25601-mMC003484	1.58237	-0.243524	0.635592
Aldh3a1-NM_7436-mMC013990	1.58222	-0.0509946	0.155381
Ierepo2-No acc-mMR029830	1.58205	0.133501	0.10235
Msmb-NM_20597-mMC012584	1.58107	-0.403494	-0.209805
6820408C15Rik-NM_177656-mMC014963	1.58083	0.992128	0.778715
Il3ra-NM_8369-mMC013319	1.58046	1.12655	0.565456
Magea7-NM_20281-mMR026798	1.57979	0.704934	0.316886
2810025M15Rik-NM_27274-mMC011953	1.57967	1.03782	0.33983
Apoh-NM_13475-mMC007762	1.57937	1.11201	1.95239
Cdh16-NM_7663-mMC010074	1.57921	0.014818	1.54143
1810017G16Rik-NM_21502-mMC006051	1.57881	2.06935	2.09349
4933417G07Rik-No acc-mMC016827	1.57855	-0.637627	-0.125906
Spg21-NM_138584-mMC004790	1.57837	1.1589	0.774104
4933436N17Rik-XM_488671-mMC014748	1.57812	0.872105	1.08068
9630041C05-No acc-mMC015121	1.57809	0.664037	1.23893
Hgd-NM_13547-mMC017972	1.57774	0.265555	0.224807
Arfrp2-NM_172595-mMC016056	1.57699	-0.0516545	0.965416
Gdi1-NM_10273-mMC008322	1.57547	-0.195218	0.528326
Phf8-NM_177201-mMC008860	1.57508	0.165854	0.646533
H2-L-No acc-mMC022502	1.57498	1.07839	1.11858
Egfl9-NM_134120-mMC015371	1.57371	0.814838	0.361769
Foxa3-NM_8260-mMC008726	1.57353	0.207206	-0.293742
Rnf8-NM_21419-mMC006452	1.57275	1.31096	0.489964
0610005A07Rik-XM_289885-mMC010174	1.5726	0.906725	1.16342
Park2-NM_16694-mMC021448	1.57199	-0.0477925	-0.767489
2010309E21Rik-NM_25591-mMC020327	1.57188	0.423348	0.27924
A330068P14Rik-XM_126447-mMC022013	1.57083	0.399442	0.964763
Vps33b-NM_178070-mMC014421	1.5706	0.456545	0.112554
P2ry2-NM_8773-mMC008716	1.56964	0.692222	1.57718
Akr7a5-NM_25337-mMC009028	1.56924	1.03638	0.88455
9630015D15Rik-NM_181401-mMC017701	1.56889	-0.0891582	0.648902
Eme2-XM_128555-mMC012704	1.56885	-0.340149	0.384282
1500034E06Rik-XM_487174-mMC014938	1.56876	0.676625	0.997679
9430030N17Rik-No acc-mMC001681	1.56868	1.1117	1.37658
Pqlc2-NM_145384-mMC013940	1.56857	0.248735	0.686881
Actl7a-NM_9611-mMC014571	1.56812	0.0944529	0.708073
Pld3-NM_11116-mMC008128	1.56797	0.835465	1.17311
Prok2-NM_15768-mMC008662	1.56696	0.48998	-1.80796
Srpx2-NM_26838-mMC009280	1.56627	1.54939	-1.3438
Uqcrc2-NM_25899-mMC012498	1.56575	1.67887	0.74869
Pag-NM_53182-mMC001545	1.56538	-0.268308	-0.855677
Mybbp1a-NM_16776-mMR028757	1.56521	-0.189928	0.926181
Bcl2a1b-NM_7534-mMR026911	1.56517	-0.464827	0.623214
Insl6-NM_13754-mMC015293	1.5648	-0.096121	-0.524121
Clstn3-NM_153508-mMC015838	1.56423	0.00625735	1.71803
Chrnb2-NM_9602-mMC022894	1.56356	0.583687	-0.246356
Abca2-NM_7379-mMC008644	1.56269	0.714292	1.43744
Aqp1-NM_7472-mMC005710	1.56189	-0.124479	-0.762109
Fut2-NM_18876-mMC011372	1.56066	0.608248	0.0351693
C030017G13Rik-No acc-mMC014514	1.55987	-0.180913	1.22183
Ptprn-NM_8985-mMC012728	1.55957	0.802742	0.547606
4631423B10Rik-NM_175422-mMC007172	1.55954	0.625998	0.994733
Il2rb-NM_8368-mMC014661	1.55772	0.530037	0.854935
2310043L19Rik-No acc-mMC013276	1.55706	0.383002	1.36238
4933427C19Rik-No acc-mMC011609	1.55689	0.919479	1.49827
Ccnb3-NM_183015-mMC008847	1.55613	1.32033	-2.88871
Gcnt1-NM_10265-mMC010349	1.55497	0.170322	-0.234614
8030431J09Rik-No acc-mMC014951	1.55474	-0.156402	1.09507
1600020H07Rik-NM_19975-mMC008672	1.55452	0.129825	0.55175
2010010A06Rik-No acc-mMC010967	1.55431	0.723977	0.758498
A330050F15Rik-No acc-mMC014707	1.55395	0.528112	0.454261
Ccr5-NM_9917-mMC019538	1.55369	-0.121411	-1.07
Etfdh-NM_25794-mMC010691	1.5524	0.919682	0.944293
Myl3-NM_10859-mMC015628	1.55192	-0.00507789	1.17891
Egr1-NM_7913-mMC010986	1.55175	0.747216	0.107156
C530015C18-NM_177681-mMC015487	1.55168	1.27733	0.560813
9430097D07Rik-NM_175679-mMC015399	1.55128	0.57547	0.334755
B130016L12Rik-NM_144835-mMC006317	1.55123	0.420676	0.148357
AI662270-No acc-mMC015752	1.55085	-0.573677	-0.35607
1700027D21Rik-NM_29661-mMC006420	1.5506	-0.298908	-0.00492249
Apof-NM_133997-mMC012209	1.55044	-0.750624	0.473769
Dpm2-NM_10073-mMC024020	1.54987	-0.399737	-0.155343
Abr-NM_198018-mMC023225	1.5484	-0.0465035	0.2599
Scospondin-NM_173428-mMC008324	1.54777	0.699588	0.553142
1110031M08Rik-XM_355145-mMC008475	1.54764	0.200445	0.239104
Gk-rs1-NM_10293-mMC014966	1.54671	-0.796499	-0.129936
5730466P16Rik-NM_173453-mMC006852	1.54644	0.644749	0.120565
4933404K13Rik-No acc-mMC003669	1.54543	0.596366	-0.2367
Pemt-NM_8819-mMC013853	1.54509	0.556155	0.455891
Serpina3k-NM_11458-mMC026035	1.54497	1.53923	2.51962
1700007I08Rik-No acc-mMC012983	1.54493	-0.015796	-0.624756
Pla2g4b-XM_355378-mMC012131	1.54476	0.0674535	-0.168802
Galc-NM_8079-mMC014809	1.54444	0.639339	1.63686
E130120L08Rik-NM_177373-mMC016636	1.5444	0.508163	0.651709
Bglap1-NM_7541-mMC022876	1.5444	0.630236	0.339695
Ggt1-NM_8116-mMC013378	1.54433	1.56004	0.687331
Mcoln2-NM_1005846-mMC009938	1.54394	-0.0836259	1.73615
Pmaip1-NM_21451-mMC016881	1.54289	-0.00900788	0.265707
Aup1-NM_7517-mMO035424	1.54235	1.04087	1.60066
Mpeg1-XM_129176-mMC013032	1.54197	0.3159	0.321219
Slc3a2-NM_8577-mMC012090	1.54184	-0.190119	0.399644
Zfp281-NM_177643-mMC012589	1.54134	0.0538255	0.00124754
1810063P04Rik-NM_24440-mMC012411	1.54128	-0.425731	0.0813503
C1qbp-NM_7573-mMC007852	1.54119	1.15316	1.14488
Tm4sf11-NM_26385-mMC009110	1.54102	-0.317177	0.144931
E430039K05Rik-NM_177318-mMC023277	1.54086	0.399675	0.512941
Fgfr4-NM_8011-mMC011783	1.54073	0.850502	1.15606
Grcc9-NM_13539-mMC012222	1.54007	-0.189409	0.51987
Olfr1508-NM_20513-mMC007486	1.53814	-0.0812019	-1.89255
4932411K12-NM_177812-mMC013604	1.53802	-0.861178	-0.155742
Gli2-XM_136212-mMC022943	1.53789	-0.218373	-0.244426
Cxcl16-NM_23158-mMC000850	1.53744	0.718555	1.66877
2700087H15Rik-NM_27422-mMC008286	1.5373	0.648038	-0.162187
H2-M10.2-NM_177923-mMC016208	1.53687	-0.689619	-1.27436
Pcdhgb4-NM_33576-mMC023413	1.53671	-0.234048	0.911634
Itga8-NM_1001309-mMC002018	1.53624	-0.298141	-1.0722
Zap70-NM_9539-mMC019091	1.53613	-0.00682546	-0.587644
4930543D07Rik-No acc-mMR029593	1.53573	-0.0568772	2.31243
C030032O16Rik-No acc-mMC008610	1.53421	1.60155	0.0646263
3010024O21Rik-No acc-mMC016364	1.53388	0.53705	0.775814
4930512P04Rik-No acc-mMC009111	1.53363	-0.894666	-0.295422
Gsta2-NM_8182-mMR026157	1.53356	1.17563	1.63629
Fbxo2-NM_176848-mMC011282	1.53337	0.995923	1.04064
Zfp57-NM_9559-mMC016487	1.53327	-0.118824	0.504626
Mical3-NM_153396-mMC011249	1.53273	0.0634733	0.26195
Fem1a-NM_10192-mMC011101	1.53238	0.800264	1.2595
Slc39a2-XM_139051-mMC012466	1.5323	-0.429627	1.4024
Rpl36a-NM_19865-mMC019197	1.53221	-0.060636	-0.0115412
4930556P03Rik-NM_29236-mMC015976	1.53212	-0.0808199	0.472377
4632433K11Rik-NM_29849-mMC004768	1.53189	0.729133	-4.11642
Atp5h-NM_27862-mMC020349	1.53131	0.764661	1.55993
4930565B19Rik-No acc-mMC010534	1.53091	0.992867	1.61743
0610009B10Rik-XM_127484-mMC011174	1.53067	0.408362	1.15258
Fads1-NM_146094-mMC004029	1.53061	-0.68695	-0.43548
0610007P22Rik-NM_26676-mMC012713	1.53049	0.24393	1.19685
Olfr514-NM_146726-mMC007810	1.53037	0.0623528	-1.81259
AI194308-NM_138752-mMC022444	1.52816	0.990391	0.480548
4930405A07Rik-No acc-mMC005484	1.52736	0.924819	0.642585
Dpysl2-NM_9955-mMC015098	1.52692	0.65628	0.306245
Rps11-NM_13725-mMC021034	1.52576	0.685464	0.580464
4921507L20Rik-No acc-mMC008487	1.52537	0.534443	0.111865
Car6-NM_9802-mMC003923	1.52536	0.782928	0.0419187
5033430J17Rik-No acc-mMC006981	1.5247	-0.399273	0.349781
Rcor3-NM_144814-mMC016800	1.52454	0.641888	1.28671
Reln-NM_11261-mMR027230	1.52317	-0.415876	0.37217
Plcd3-NM_152813-mMC003590	1.52154	0.888262	-0.28652
Snai3-NM_13914-mMC008576	1.52082	1.25707	1.13251
2610318C08Rik-NM_181589-mMC016228	1.52013	0.782795	0.989313
BC005624-NM_144885-mMC020752	1.51974	0.213887	0.0670068
Cacna1a-NM_7578-mMC008584	1.51972	0.354655	-0.326038
Lrp8-NM_53073-mMC012215	1.51941	0.586075	1.49109
A730016A17-No acc-mMC012064	1.51881	-0.272345	1.40913
Muc2-XM_133960-mMC014204	1.51865	1.79479	2.87628
A930031F18Rik-NM_29992-mMC015331	1.51861	-0.839076	1.31172
4933417A18Rik-NM_25750-mMC015660	1.51846	0.157562	0.487473
4921524M04Rik-No acc-mMC014766	1.51831	0.117201	-0.191381
Syn2-NM_13681-mMR031031	1.51761	-0.233407	0.8796
Swap70-NM_9302-mMC022755	1.51759	0.721835	0.39371
3010003L10Rik-No acc-mMC012809	1.51703	0.214297	1.59592
Gab3-NM_153073-mMC023507	1.51576	0.333215	1.05985
2010012F05Rik-NM_29362-mMC022084	1.51412	0.32586	1.02594
Olfr694-NM_146452-mMC021877	1.51411	0.169144	0.976206
Myst3-XM_146248-mMC011437	1.51344	0.567535	1.39718
Ptges2-NM_133783-mMC015494	1.51322	-0.132057	2.16052
Sult2a2-NM_9286-mMC019814	1.51271	0.771008	0.547748
C530025M09Rik-XM_485076-mMC015283	1.51185	0.485125	1.2745
A430092G05Rik-No acc-mMC014594	1.51137	-0.0745138	0.16406
Paqr4-NM_23824-mMC010238	1.51058	0.587305	-0.189649
Pex11c-NM_26951-mMC009704	1.51054	-0.233507	0.921297
Dnaja4-NM_21422-mMC005397	1.50987	0.532243	0.291154
A830080L01Rik-No acc-mMC017342	1.50976	0.169982	-0.648785
Ifnt1-NM_177348-mMC004852	1.50963	0.49691	0.518158
2600011E07Rik-XM_127745-mMC012276	1.50888	0.0462886	-0.182327
G431001E03Rik-NM_177364-mMC015575	1.50852	0.529693	-0.274378
Abcc6-NM_18795-mMC010952	1.50798	0.341575	1.21864
C530001K22Rik-No acc-mMC014459	1.50767	0.212396	1.13636
Cyp2c50-NM_134144-mMC023669	1.50647	1.02229	0.741093
Cyp2j13-NM_145548-mMC016270	1.50608	1.06429	0.172014
4930412E21Rik-No acc-mMC021292	1.5059	0.510363	1.69369
Crhbp-NM_198408-mMC021972	1.50572	0.486925	-0.210999
Adar-NM_19655-mMC005148	1.50515	0.098299	-1.40769
Atp9a-NM_15731-mMC013556	1.50509	0.209345	0.773728
4930449E07Rik-NM_29044-mMC021829	1.50495	0.568803	0.587807
Drd2-NM_10077-mMC011579	1.50384	0.767117	0.390942
Irf7-NM_16850-mMC020732	1.50361	0.0927454	1.3462
1700030M09Rik-No acc-mMC012541	1.50332	-0.2711	0.646859
Tsga10ip-XM_355133-mMC008022	1.50329	0.701646	1.3206
Lalba-NM_10679-mMC015193	1.50254	-0.268258	0.246943
Cpn1-NM_30703-mMC010193	1.50114	1.24137	0.653039
BC025575-NM_199200-mMC012306	1.50061	0.497564	1.36072
Il17c-NM_145834-mMC009859	1.49979	1.8077	1.22257
Olfr315-NM_146538-mMC002530	1.499	0.228073	0.778371
4933415A04Rik-No acc-mMC009334	1.49894	0.746762	-0.0440985
Akt2-NM_7434-mMR030538	1.49836	-0.144875	1.28979
Asb8-NM_30121-mMC012981	1.49822	-0.267204	0.978926
Myoc-NM_10865-mMC008658	1.49731	1.33277	0.488001
Adck2-NM_178873-mMC016916	1.49666	0.068829	1.0305
Polr3f-NM_27417-mMC002541	1.49665	-0.169533	1.0119
1810010M01Rik-NM_26918-mMC009277	1.49644	0.612543	1.048
AI451006-NM_178919-mMC015447	1.49603	0.216043	-0.0600773
4930405L22Rik-No acc-mMC014987	1.49489	0.0150849	0.358613
9130231C15Rik-NM_133960-mMC005639	1.49485	-0.167541	-0.0617077
1810073O08Rik-No acc-mMC016518	1.49474	0.214423	-0.380248
Slc27a2-NM_11978-mMC009074	1.49422	0.138736	0.544372
Thrap3-NM_146153-mMC009694	1.49403	0.307172	0.591359
Il13-NM_8355-mMC018243	1.49352	-0.23587	1.24285
Crhr2-NM_9953-mMC012659	1.49327	0.524032	1.27979
D930006K15Rik-No acc-mMC007618	1.49326	0.0166947	0.590222
Gtl2-NM_144513-mMC012606	1.49241	-0.232009	-0.952517
Gpr84-NM_30720-mMC007943	1.49201	0.323829	-0.266985
Cabin1-XM_354546-mMC009347	1.49167	0.614695	0.593393
Mlp-NM_10807-mMC008867	1.49158	1.36946	-0.327755
Foxp4-NM_28767-mMC015149	1.4898	1.10037	0.571121
Jph2-NM_21566-mMC009784	1.48925	0.896406	1.20546
Rpia-NM_9075-mMC015310	1.48882	0.955297	1.28604
2010106G04Rik-No acc-mMC004779	1.48833	0.283846	-0.727385
5031425F14Rik-No acc-mMC011478	1.48824	0.518957	1.33773
Hnrpul1-NM_144922-mMC002043	1.48702	0.610222	0.986905
Sesn1-XM_125538-mMC018594	1.48612	0.120266	0.839733
Gak-NM_153569-mMC009504	1.48596	2.08616	1.33118
Myoz1-NM_21508-mMC009714	1.48491	-0.584988	-0.818692
Sppl3-XM_485673-mMC010011	1.48483	-0.353422	0.423537
Pccb-NM_25835-mMC010209	1.48468	0.505526	0.293428
1700029G01Rik-NM_25856-mMC010143	1.48389	0.559605	0.649469
Zfp59-NM_11762-mMC022409	1.48228	0.0779883	0.966957
Gsta1-NM_8181-mMR029831	1.48169	1.75416	1.3258
Gbx2-NM_10262-mMC010627	1.48154	-0.062409	-0.202564
Dap-NM_146057-mMC006994	1.48095	0.607802	0.683331
2210018M11Rik-No acc-mMC020742	1.4808	-0.192913	0.667981
Mal-NM_10762-mMC014678	1.48013	0.620399	0.682502
Ghrhr-NM_1003685-mMC004683	1.47967	0.805044	0.558501
Adm2-NM_182928-mMC007928	1.47913	0.415391	0.815321
Slc17a2-NM_144836-mMC003549	1.47907	-0.497955	1.35809
Car5b-NM_19513-mMC016829	1.47867	0.383471	0.253531
Atp5g1-NM_7506-mMC023223	1.47847	0.792088	1.65553
Adamts7-NM_1003911-mMC017324	1.47782	0.0535561	-0.410123
Serpina1a-NM_9243-mMC024667	1.47677	0.71465	2.17279
Rpl7-NM_11291-mMC023558	1.47603	1.03821	0.175235
Cited2-NM_10828-mMC018000	1.47552	0.133647	0.139658
Tom1-NM_11622-mMC014574	1.47523	-0.314513	0.505406
4930403D09Rik-No acc-mMC016065	1.47351	0.588029	1.0279
Myo15-NM_10862-mMC011538	1.47283	0.410912	1.88069
D6Ertd474e-XM_489158-mMC009837	1.47015	0.603795	-0.207035
Fzd9-XM_284144-mMC012985	1.47011	-0.338356	0.0553349
Sh2d4b-XM_127666-mMC024900	1.4701	-0.405167	0.254045
Gdpd2-NM_23608-mMC008053	1.46947	0.55212	0.939165
Nedd9-NM_17464-mMC014053	1.46946	0.585811	0.19479
Pzp-NM_7376-mMC003083	1.46895	-0.934917	1.43779
AI316787-NM_199199-mMC014887	1.46893	-0.175058	-0.935581
1500016L11Rik-NM_26885-mMC015326	1.46852	-0.147569	0.512183
Pde10a-NM_11866-mMC012718	1.46771	-0.33387	1.1509
Bzrp-NM_9775-mMC007558	1.46742	1.00776	0.867458
D3Ertd300e-NM_19995-mMR028503	1.46729	-0.132069	0.559802
5033405D04Rik-No acc-mMC006948	1.46676	1.04567	0.80837
Il9r-NM_8374-mMC014063	1.46615	1.33317	1.46575
A630042L21Rik-NM_134134-mMC005740	1.46574	-0.308418	-1.50744
6330581N18Rik-NM_176915-mMC021564	1.46549	1.18974	0.788586
A730042J05Rik-NM_178708-mMC006603	1.465	0.7189	0.916713
Edg8-NM_53190-mMC011213	1.46323	0.550658	-0.808113
1810017N16Rik-NM_175402-mMC012730	1.46283	0.686891	1.07339
2410124H12Rik-XM_128328-mMC015805	1.46218	0.60352	0.927097
5830426C09Rik-No acc-mMC007079	1.46173	-0.375763	0.500385
AW125441-No acc-mMC014432	1.46161	0.391118	0.155892
Tnrc15-NM_146112-mMC012372	1.46151	0.595927	0.828368
4930432O09Rik-No acc-mMC013329	1.46098	0.361097	-0.355381
Arl6ip1-NM_19419-mMC017725	1.46062	0.0841329	0.643317
4930517K11Rik-NM_26594-mMC017067	1.45979	-0.140217	-0.0384277
Ephb4-NM_10144-mMC002267	1.45924	0.928599	0.686382
Brp44l-NM_18819-mMC021122	1.45816	0.364136	-0.163233
Smarca3-NM_9210-mMC011734	1.45768	0.231897	0.32103
1110025F24Rik-NM_26393-mMC006951	1.45746	1.20309	-4.91103
Rims4-NM_183023-mMC009607	1.45616	-0.268412	0.876774
4930442H23Rik-No acc-mMC012031	1.45613	-0.275194	0.723786
Casq2-NM_9814-mMC006914	1.45609	-0.00734972	-0.0250125
Bcorl1-NM_178782-mMC021690	1.45609	-0.297589	0.554577
9330111N05Rik-No acc-mMC017380	1.45522	0.0884312	1.02564
Frs3-NM_144939-mMC015496	1.45505	-0.22146	0.261411
Olfr669-NM_147043-mMC015692	1.45468	0.424557	0.555022
Heph-NM_10417-mMC011990	1.45465	0.440745	1.13797
BC019560-XM_125947-mMC015061	1.45415	0.815053	-0.35335
Krtdap-No acc-mMR029970	1.45227	0.85639	0.358058
Mgst1-NM_19946-mMC006244	1.45159	0.00497408	-1.04999
2810405I11Rik-NM_24190-mMC016428	1.45149	0.292719	0.840653
Atp11a-NM_15804-mMC012628	1.4504	-0.544026	0.283493
Ier3-NM_133662-mMC012054	1.44954	0.161798	0.642344
D430002O22Rik-No acc-mMC014734	1.4475	-0.4022	-0.00916747
Gcgr-NM_8101-mMC006833	1.44721	0.929023	1.73478
2010013I23Rik-No acc-mMC024103	1.44666	-0.216208	0.0514667
Pou2f3-NM_11139-mMC021434	1.44638	0.0844445	-0.549712
Ptk9-NM_8971-mMR028332	1.44563	0.351359	0.134034
4930405G09Rik-No acc-mMC013053	1.44535	0.543123	0.440807
Tbcc-NM_178385-mMC015454	1.44511	-0.291493	1.08779
C130034I24Rik-No acc-mMC016034	1.44495	-0.278368	-0.195276
D6Wsu163e-NM_138594-mMC013667	1.44486	0.165476	0.372969
Sytl3-NM_31395-mMR027101	1.44485	1.12553	0.768634
2210013K02Rik-NM_23712-mMC009109	1.44476	0.826204	-0.16616
Abhd6-NM_25341-mMC005038	1.44457	0.0912443	-0.718522
Cited1-NM_7709-mMC015991	1.44421	0.653454	1.15372
Gcn5l2-NM_20004-mMC015249	1.44416	0.948877	0.68107
4432404J10Rik-NM_25709-mMC012885	1.44353	1.30018	0.856511
Scn1b-NM_11322-mMC009645	1.44291	0.738487	1.59658
2010203O03Rik-No acc-mMC020909	1.44282	0.432276	0.408331
Galm-NM_176963-mMC013829	1.44242	0.22465	0.775847
Hist3h2ba-NM_30082-mMC014895	1.44146	0.395869	0.542007
1700012A03Rik-NM_29587-mMC002078	1.44128	0.0121624	-2.60277
Inpp5d-NM_10566-mMC016814	1.44123	-0.0422662	-0.179164
Slc38a1-NM_134086-mMC016260	1.44104	-0.0618245	0.662317
2210417D09Rik-NM_25620-mMC004012	1.44044	1.26987	-0.741077
Pcsk1n-NM_13892-mMC009580	1.44022	0.228934	0.702867
Fxyd1-NM_19503-mMC013963	1.43977	0.0990917	0.916118
Olfr1346-NM_146916-mMC010298	1.43968	0.578179	0.961127
Wtip-NM_207212-mMC020774	1.43897	0.569973	1.77023
Apba2-NM_7461-mMC001029	1.43828	0.87097	1.05142
Il17rd-NM_134437-mMC013876	1.4376	-0.385373	0.689794
Gm2a-NM_10299-mMC019046	1.43732	1.82348	0.559682
C030033F14Rik-No acc-mMC014541	1.43731	-0.450415	-0.453496
Sall4-NM_175303-mMC003739	1.43702	0.194599	0.961156
8430423G03Rik-XM_149714-mMC012388	1.437	0.328775	1.4154
C430041B13Rik-No acc-mMR029197	1.43668	-0.275976	0.273849
BC027092-No acc-mMR029327	1.43586	1.34188	0.607321
Pyp-NM_26438-mMC004699	1.43532	0.695661	0.13968
Kif24-NM_145101-mMC013868	1.43493	0.353956	1.0039
4933404M02Rik-NM_25744-mMC014306	1.43483	0.634437	1.24714
Gng7-NM_10319-mMC009913	1.43455	-0.271023	-0.199067
8430422M09Rik-No acc-mMC014846	1.43416	-0.398529	-0.532519
Rlbp1-NM_20599-mMC003106	1.4335	-0.33109	0.367186
Ticam2-NM_173394-mMC014302	1.43291	0.334138	1.32158
Amacr-NM_8537-mMC013777	1.43267	-1.09971	0.0523613
D14Ertd226e-NM_145928-mMC010280	1.43229	-0.459747	-0.571795
D030041N04Rik-NM_173012-mMC009191	1.43017	-0.0160571	-2.48178
2310007H09Rik-XM_486016-mMC014873	1.42814	0.59759	0.956171
Ube2h-NM_9459-mMC014143	1.4281	0.594828	0.668877
Smad2-NM_10754-mMC005128	1.42783	0.505763	-1.58811
Wnt3-NM_9521-mMC009364	1.42772	0.558321	1.30562
4930545K18Rik-No acc-mMC009102	1.42726	0.966518	1.36957
Ethe1-NM_23154-mMC005735	1.42704	1.06066	1.06313
9530066K23Rik-NM_172524-mMC005191	1.42698	0.590287	0.987685
Edaradd-NM_133643-mMC003910	1.42679	0.856145	0.4293
1500031H01Rik-XM_358753-mMC021952	1.42628	0.867993	1.40718
Bat4-NM_32460-mMC017077	1.42585	0.758835	0.695919
Ucp1-NM_9463-mMC016083	1.42568	-0.43777	-1.55468
Tas2r137-NM_21562-mMC013950	1.42548	0.382963	0.665912
Hrh3-NM_133849-mMC017356	1.4244	-0.117203	-0.202391
Syt8-NM_18802-mMC003504	1.42434	1.73821	-1.14696
Gcap15-No acc-mMR027986	1.4242	-0.186164	2.21799
B230118H07Rik-NM_26592-mMC011835	1.42403	0.122459	0.193255
Slc25a14-NM_11398-mMC014744	1.42351	0.0592874	0.940322
Ebf1-NM_7897-mMR029014	1.42331	-0.478034	1.00498
Aipl1-NM_53245-mMC013899	1.41978	-0.0293705	0.301793
5830435C13Rik-No acc-mMC026139	1.41954	-0.387067	0.296699
5330430B06Rik-No acc-mMC014840	1.41888	0.0874208	1.01444
2210402C17Rik-No acc-mMC012082	1.41836	-0.326005	0.0365731
Clecsf9-NM_19948-mMC018223	1.41814	-2.38964	-0.46817
Lrp12-NM_172814-mMC019042	1.4174	-0.419086	-0.365547
Olfr1507-NM_20512-mMC016031	1.41725	0.997519	0.728422
Pim2-NM_138606-mMC025777	1.41721	0.615983	1.37211
Ttc7-NM_28639-mMC014221	1.41642	0.279188	-0.448543
E130102B10Rik-No acc-mMC011111	1.41561	-0.167689	1.45315
AU018778-NM_144930-mMC001797	1.41557	0.687582	1.00198
Slc22a2-NM_13667-mMC011545	1.41538	0.699306	1.74013
Sympk-XM_485873-mMC012474	1.41484	1.57323	1.29722
Fh1-NM_10209-mMC004822	1.41482	1.03692	-0.253153
Plekhm2-XM_204109-mMC009303	1.41479	0.746515	0.0756889
Centg3-NM_139153-mMC002034	1.41439	-0.403572	0.194667
1500031H01Rik-XM_358753-mMC003020	1.41379	0.605628	1.66462
C8b-NM_133882-mMC003455	1.41307	0.513155	1.69618
BC010250-NM_178029-mMC022565	1.41305	0.960817	1.02593
18S-rRNA_X00686-mMO035951	1.4128	0.4101	-0.00914439
4933402N03Rik-XM_133877-mMC008294	1.41228	0.480428	0.105483
Slac2b-NM_176846-mMC010894	1.4114	0.15553	-1.29748
Nbl1-NM_8675-mMC015412	1.41113	-0.234612	0.503873
3110040D16Rik-XM_126172-mMC024179	1.41093	0.513325	0.445044
Cyp24a1-NM_9996-mMC011550	1.41049	-0.266046	-1.10631
Pigo-NM_20035-mMC014786	1.40853	-0.205487	0.154544
Sorcs2-NM_30889-mMC010937	1.40735	0.741004	2.40403
Phka2-NM_172783-mMC003533	1.40721	-0.101803	-0.529555
Rpl8-NM_12053-mMC010606	1.40693	0.296729	0.747085
F7-NM_10172-mMC011664	1.40668	0.443743	0.840825
2310016A09Rik-NM_181588-mMC009716	1.40622	0.0182066	-0.0987424
Zdhhc14-NM_146073-mMC005646	1.40615	0.649967	0.750224
4933403O08Rik-XM_136029-mMC001703	1.40589	-0.720219	0.428515
Rps6-NM_9096-mMC025786	1.4043	-0.0491632	1.21999
Abcb11-NM_21022-mMC009881	1.40353	0.380933	1.55316
2610036D13Rik-NM_29282-mMC008943	1.40336	0.647401	1.22838
Nt5c3-NM_26004-mMC016279	1.402	0.508847	0.556876
Vps41-NM_172120-mMC016851	1.40106	0.0400264	0.00917653
Crip1-NM_7763-mMC022188	1.40057	1.42904	0.989719
BC055368-NM_183017-mMR030651	1.39926	-0.459269	0.454529
6820443O06Rik-NM_1005510-mMC013974	1.39877	0.521935	0.603084
BC021917-NM_145496-mMC016856	1.39783	-0.329302	-0.359195
Cox7c-NM_7749-mMC021514	1.39766	1.07619	1.41846
A430081F14Rik-No acc-mMC013993	1.39753	0.762732	1.20507
Clspn-NM_175554-mMC015095	1.39711	-0.376213	-0.0596503
F10-NM_7972-mMC007683	1.39708	0.806823	0.835274
6430567E01Rik-No acc-mMC017745	1.39667	0.0314442	-0.504416
Faah-NM_10173-mMC026050	1.39652	0.36641	1.47255
4933426M11Rik-NM_178682-mMC003886	1.39648	0.219098	0.745472
Hdac5-NM_10412-mMC009802	1.39555	0.934286	1.12541
Ppfibp2-NM_8905-mMC012374	1.39534	0.817436	0.786522
Rhoc-NM_7484-mMC013713	1.39525	0.30454	0.277306
Mbd3l1-NM_28557-mMC011941	1.39516	0.635817	-0.0542757
Des-NM_10043-mMC005707	1.3946	1.08592	1.14926
Cope-NM_21538-mMC024291	1.39398	1.46666	0.310758
Gstt1-NM_8185-mMC014495	1.39316	1.66971	0.115757
Gtpbp1-NM_13818-mMC015574	1.39215	0.779011	0.90483
Odf4-NM_145746-mMC011922	1.39201	-0.017447	1.06739
scl0000r-REVCOMP-mMO035837	1.39167	0.971364	0.636049
Mrps35-NM_145573-mMC014212	1.39108	0.331587	0.0701079
BC004012-NM_138671-mMC012295	1.39011	-0.141725	-0.648644
Olfr211-NM_146912-mMC009405	1.38967	-0.513191	0.286793
Aldoa-NM_7438-mMC021290	1.38939	0.660503	1.47862
BC025600-NM_146162-mMC007228	1.38934	-0.72719	1.51951
2610034E13Rik-NM_29365-mMR030791	1.38913	0.645123	0.22449
E130105L11Rik-No acc-mMC015905	1.3891	0.212997	0.118582
Oas1a-NM_145211-mMC023596	1.38888	0.695274	1.08546
C430010C01-No acc-mMC002270	1.38869	0.245914	-0.994303
Cnnm2-NM_33569-mMR029608	1.38789	-0.0266723	0.625005
C230094B09Rik-No acc-mMC017401	1.38706	-0.108004	-1.31365
Uck1-NM_11675-mMC021677	1.38684	-0.159461	-0.929647
C630013N10Rik-NM_172052-mMC015077	1.38632	1.55912	0.27286
2810012L14Rik-NM_29581-mMC002517	1.38589	0.572123	0.703719
Rpl10-NM_52835-mMC022268	1.38578	0.949681	0.946687
A230106N23-NM_177838-mMC014194	1.38519	0.890543	1.35634
Galr3-NM_15738-mMC025153	1.3851	-0.000261722	0.607956
2210008F06Rik-No acc-mMC009427	1.38463	0.342018	0.747056
Endogl1-NM_172456-mMC001636	1.3839	2.11168	0.330685
Smn1-NM_11420-mMC012632	1.38366	-0.120274	0.484664
Atp8a2-NM_15803-mMC019990	1.38312	0.895351	1.35014
Chaf1b-NM_28083-mMC008352	1.3831	1.27928	0.428606
Hebp2-NM_19487-mMC007865	1.3827	1.01301	0.566932
C130075A20Rik-No acc-mMC016335	1.38189	0.96194	-0.0973599
C2ta-NM_7575-mMC013004	1.38154	0.226361	0.378484
4930519N13Rik-NM_207204-mMC007739	1.38143	0.575105	0.944838
Rfc5-XM_132348-mMC022371	1.3812	0.640093	2.00976
Wdr22-NM_177267-mMC009383	1.38099	0.379342	0.371045
D930023I05Rik-No acc-mMC009976	1.38061	0.858559	1.17686
Dusp15-NM_145744-mMC014762	1.38037	0.605464	1.75617
AK122498-XM_143575-mMC008061	1.37997	0.666378	-0.676478
Mrpl15-NM_25300-mMC007323	1.37993	-0.356274	0.387298
Serpina6-NM_7618-mMC007083	1.37953	1.21346	-1.51934
Nrgn-NM_22029-mMC008659	1.3793	0.733444	-0.34366
Chdc1-XM_484393-mMC006926	1.37872	0.886083	1.4193
Podxl-NM_13723-mMC014101	1.3782	-0.223818	0.737879
Ly6h-NM_11837-mMC017506	1.37699	0.145798	-0.199883
1110046J04Rik-No acc-mMC006719	1.37689	-0.318292	-0.639895
Mdm2-NM_10786-mMC002697	1.37635	0.011299	-0.28894
Hspa12a-NM_175199-mMC016081	1.37555	-0.0412933	0.565682
C230066K19Rik-No acc-mMC020400	1.37372	0.155133	1.16014
Hoxc9-NM_8272-mMC016505	1.37337	-0.607101	0.891184
Nfs1-NM_10911-mMC013826	1.3731	-0.0625322	0.460674
2010009L17Rik-NM_25630-mMC003476	1.37228	0.462502	0.168212
Ssr4-NM_9279-mMC003321	1.3721	-1.22586	0.796402
Ppp1r11-NM_29632-mMC017208	1.37135	0.0760413	0.751749
Klf7-NM_33563-mMC007388	1.37123	-0.226729	0.544527
Ddx27-NM_153065-mMC010579	1.37016	0.629311	0.405196
Ostm1-NM_172416-mMC018316	1.37002	-0.118605	-0.109841
IGHA-J00475-mMO036224	1.3699	0.561418	1.23106
Fmo5-NM_10232-mMC006022	1.36968	0.449555	-1.06312
Rrbp1-NM_24281-mMC015755	1.369	0.935798	1.14237
Faf1-NM_7983-mMC002985	1.36878	-0.185871	-0.33387
Ss18l1-NM_178750-mMC017391	1.36837	-0.0527361	0.00348361
Bucs1-NM_54094-mMC005729	1.36811	0.567445	0.63455
Syt1-NM_9306-mMR026348	1.36764	0.322649	0.546238
Tubb3-NM_23279-mMC025481	1.36749	0.584603	1.55455
Grik1-NM_146072-mMC007358	1.36639	-0.119983	0.431373
Dusp14-NM_19819-mMC019809	1.36636	-0.18159	2.8788
9630050M13Rik-XM_194000-mMC011016	1.36629	0.658039	0.931712
Bri3-NM_18772-mMC007846	1.36616	0.488444	-0.148284
4930505A04Rik-XM_126074-mMC015917	1.3661	0.0594067	0.374074
A530065E19Rik-NM_145433-mMC010511	1.36582	0.401183	1.12415
4930455D15Rik-No acc-mMC015674	1.36566	0.513673	-0.0796327
E130306D19Rik-XM_131404-mMC014506	1.36546	0.00215078	0.236992
5730578N08Rik-NM_25693-mMC014835	1.36483	0.102636	2.36712
Gnefr-NM_13789-mMC011361	1.36442	0.525794	-0.643527
Mcam-NM_23061-mMC016015	1.36431	0.190737	0.929083
Fundc1-NM_28058-mMC012401	1.3639	-0.530765	0.662354
6530411M01Rik-No acc-mMC015694	1.36247	-0.0813244	0.856926
Crygd-NM_7776-mMC021605	1.36215	-0.119013	0.0219764
3110006E14Rik-XM_127466-mMC011570	1.36195	0.491149	0.891724
5730557B15Rik-NM_26153-mMC016018	1.36162	-0.02351	0.0482481
A930019D19Rik-No acc-mMC001696	1.36062	-0.0255458	-0.30798
Lynx1-NM_11838-mMC013267	1.35968	0.355368	-0.316638
Il27-NM_145636-mMC009298	1.35939	1.04789	1.40418
Hmgb2l1-NM_178017-mMC017574	1.3591	-0.392399	-0.434994
4733401L19Rik-XM_203344-mMC012712	1.35906	-0.0348644	-0.538032
7030401O21Rik-NM_198035-mMC008638	1.35882	0.0882688	0.408298
Krtap5-1-NM_15808-mMC023303	1.35878	0.556184	1.34641
Hdac11-NM_144919-mMC002230	1.35863	0.503568	0.541505
BC061237-NM_198677-mMC019565	1.35836	0.464293	-0.291759
Cdk6-NM_9873-mMC008913	1.35802	0.598341	1.07385
Bcl2l12-NM_29410-mMC004501	1.35729	-0.257707	-0.058271
2210404D11Rik-NM_178397-mMC015469	1.35716	-0.221546	0.729232
A830055N07Rik-No acc-mMC015301	1.35599	1.07259	1.0953
Slc35b3-NM_134060-mMC010047	1.35537	0.361129	-0.120041
AA517853-NM_153799-mMC003655	1.35483	0.503711	0.967857
C130070B15Rik-NM_177286-mMC003936	1.35414	0.860295	0.329338
Fdps-NM_134469-mMC020798	1.35332	0.941712	1.70689
Adrbk2-NM_177078-mMC023210	1.35314	0.183508	0.933871
Kif12-NM_10616-mMC015431	1.35311	0.700342	0.91631
D630041G03Rik-No acc-mMC025467	1.35306	-0.491632	1.13849
2010001A14Rik-No acc-mMC009550	1.35255	0.00465132	-0.493411
Wwox-NM_19573-mMC024937	1.35254	0.54332	0.286959
Serpinc1-NM_80844-mMC024672	1.35219	0.0844241	2.30575
BC024322-NM_173748-mMC018036	1.35214	-1.27909	-0.288728
Trip10-NM_134125-mMC009113	1.35188	0.201517	0.203987
Irx4-NM_18885-mMC023682	1.35151	-0.0943807	0.546027
Srp68-NM_146032-mMC009685	1.35121	0.431522	0.237625
Fnbp4-NM_18828-mMC017094	1.35084	-0.158005	0.419007
Ndufb10-XM_128594-mMC012744	1.35061	0.750902	0.869661
Bmper-NM_28472-mMC012246	1.35009	-0.613925	0.492601
Igh-V15-XM_487237-mMC009099	1.34997	-0.227119	-0.164502
Efnb1-NM_10110-mMC016048	1.34989	0.360003	-0.416753
9430088N01Rik-No acc-mMC007664	1.34967	0.230122	-0.582819
Itih2-NM_10582-mMC005793	1.34964	0.975589	0.535801
Cblb-XM_358863-mMC013957	1.34909	0.178382	2.05936
Khdrbs2-NM_133235-mMC016126	1.349	-2.44787	-0.505015
9430091N11Rik-No acc-mMC008987	1.34894	0.468218	0.808252
0610006O14Rik-NM_133764-mMC011760	1.34893	0.974205	1.19401
Rpl21-NM_19647-mMC026111	1.3485	0.775074	1.08494
2810408A11Rik-NM_27419-mMC013006	1.34811	1.06899	1.38148
Scamp1-XM_484305-mMC012622	1.34806	-0.299495	0.903167
2410001E19Rik-XM_134644-mMC010455	1.34733	1.26607	0.752523
4930441N18Rik-No acc-mMC017006	1.34728	0.991893	1.30439
1700018O18Rik-XM_131683-mMC006602	1.34657	-0.439357	-2.02167
5430413K10Rik-NM_175167-mMC004261	1.34533	0.0173948	-0.387915
4930442M18Rik-No acc-mMC003160	1.3444	-0.18065	-0.654963
Taf5l-NM_133966-mMC013831	1.34432	-0.23263	0.351787
A730055L17Rik-NM_177219-mMC006796	1.34428	0.0207124	0.978874
Eppk1-NM_144848-mMC012358	1.34419	-0.14875	1.04858
2310043M15Rik-No acc-mMC013200	1.34415	-0.560494	-0.363591
Cdc25c-NM_9860-mMC014443	1.34356	0.565618	-0.359954
A430072C10Rik-NM_176967-mMC014081	1.34319	0.810502	1.56608
Ky-NM_24291-mMC003921	1.34312	0.277312	0.717642
Stk25-NM_21537-mMC011961	1.34161	2.18896	0.9842
1110025G12Rik-NM_29844-mMC006767	1.3416	0.520683	0.256484
Strn-NM_11500-mMC011251	1.34038	-0.249878	0.373261
Casp9-NM_15733-mMC015801	1.33948	-0.0661886	0.0520368
2610528K11Rik-NM_175184-mMC009403	1.33912	-0.920796	-0.0932545
A930037G23Rik-NM_178787-mMC008609	1.33907	1.60024	0.893101
3230401I01Rik-NM_26140-mMC007026	1.33867	-0.0935692	-0.102195
Cyp4f14-NM_22434-mMC023521	1.33853	0.785397	0.714863
Tlx3-NM_19916-mMC014136	1.33793	0.957915	1.61339
5430437A18Rik-No acc-mMC019383	1.33726	0.252251	-0.0908696
4930503L19Rik-NM_172967-mMC009308	1.33716	-0.131431	-2.78948
C730036D15Rik-NM_145368-mMR001413	1.33623	0.141715	0.0915791
Psma6-NM_11968-mMC014422	1.3361	0.136668	-0.185015
Hibadh-NM_145567-mMC010763	1.33524	0.513512	0.414759
1110001A05Rik-NM_19808-mMC015670	1.33441	-0.0312347	-0.227155
2310061A09Rik-No acc-mMC017100	1.33426	0.116909	-0.45587
Nfix-NM_10906-mMC022777	1.33407	0.0638052	1.31864
LOC223672-XM_128064-mMC023184	1.33366	0.707924	-0.563421
Pcdhb10-NM_53135-mMC012967	1.3332	-0.0771307	0.74034
Rab11fip4-NM_175543-mMC009018	1.33281	0.647445	1.14019
Ralgds-NM_9058-mMC009974	1.3316	0.151952	0.598212
Iqcc-NM_198026-mMC004380	1.3314	-0.247817	-3.34028
Dctn2-NM_27151-mMC022470	1.33105	0.900644	1.9488
Prkaca-NM_8854-mMC012459	1.33057	0.177547	-0.619744
Kcna7-NM_10596-mMC004155	1.33036	-0.41434	-0.636093
Hspa8-NM_31165-mMC025232	1.32919	-0.551212	1.46772
Rpp21-NM_26308-mMC010946	1.32907	0.157784	1.09752
1300017K07Rik-NM_27919-mMC011368	1.32906	-0.465004	-1.46404
Asb12-NM_80858-mMC009776	1.32905	0.648723	1.173
Rhoj-NM_23275-mMC006819	1.32882	-0.697779	0.46997
2310043J07Rik-XM_485688-mMC013225	1.32867	0.472067	0.853283
E130303B06Rik-NM_198299-mMC010056	1.3282	0.550452	1.53552
Psap-NM_11179-mMC014246	1.32803	0.515296	1.71353
2310050C09Rik-XM_485268-mMC004151	1.3264	0.855004	0.691407
Rnf111-NM_33604-mMC024657	1.32621	0.486565	1.06597
4930525C09Rik-No acc-mMC014948	1.32608	0.593441	1.28589
Aldoc-XM_126120-mMC016371	1.32564	-0.0156533	1.31983
Epha6-NM_7938-mMC007963	1.32481	0.857242	-0.928634
Proc-NM_8934-mMC016079	1.32473	0.297224	0.369636
Ilk-NM_10562-mMC021128	1.32466	0.160645	-0.397021
Olfr448-NM_146273-mMC017651	1.32462	-0.27002	-0.0469592
Vps24-NM_25783-mMC017117	1.32433	0.436517	0.776574
Wfikkn1-XM_128578-mMC005510	1.32332	0.933275	-0.300977
Ccnd2-NM_9829-mMC011981	1.32314	-0.290341	0.764278
5830445D09Rik-No acc-mMC015030	1.32224	0.525864	0.118217
Ubap2-NM_26872-mMC015556	1.32166	0.330078	1.25236
IGHV2S4-U53526-mMO036184	1.32165	1.06963	0.429514
1700010H22Rik-NM_29312-mMC010467	1.32144	-0.513075	0.188465
5730427M17Rik-XM_488530-mMC023980	1.32119	0.248519	1.15257
Iqcd-NM_29408-mMC016004	1.32044	0.940119	1.07973
Trim39-NM_24468-mMC016979	1.32012	-0.0825404	0.108269
4933425H06Rik-No acc-mMC009848	1.31949	0.561007	0.575314
C1ql1-NM_11795-mMC011959	1.31917	0.539712	0.670278
Bmp8b-NM_7559-mMC013970	1.31914	0.852569	1.11653
Olfr554-NM_146325-mMC016345	1.31858	-0.0923838	1.08287
Grin2c-NM_10350-mMC010712	1.3183	0.697353	0.168918
Ndufb9-NM_23172-mMC023932	1.31611	0.290669	0.889556
Ecm1-NM_7899-mMC013423	1.31605	0.246052	0.242293
Ap1b1-NM_7454-mMC023008	1.31601	-0.259988	0.302215
9130017N09Rik-NM_30218-mMC012133	1.31592	0.12137	-0.176159
2310032F03Rik-XM_130301-mMC017096	1.31469	0.222456	0.708285
0610009K11Rik-NM_26689-mMC010578	1.31382	0.601377	0.355337
D130027J01Rik-No acc-mMC023243	1.31353	-0.379611	0.396835
Cyp2g1-NM_13809-mMC009125	1.3128	1.73868	1.3209
1110004B13Rik-NM_25838-mMC005126	1.31274	0.419695	-1.396
2700068H02Rik-No acc-mMC015958	1.31257	1.47951	0.588686
BC027072-NM_146082-mMC017150	1.3117	0.381621	-0.595702
9630045H20Rik-No acc-mMC006690	1.31096	0.15284	0.0480969
C030044C12Rik-No acc-mMC001549	1.31045	-0.0749627	0.107023
Stx1a-NM_16801-mMC008708	1.31031	0.684223	1.15073
Olfr1360-NM_146543-mMC017087	1.31018	0.591495	0.024101
Ovca2-NM_27136-mMC022099	1.3098	0.446523	0.789253
1110001J03Rik-NM_25363-mMC010941	1.30892	0.678565	-0.70898
Klk10-NM_133712-mMC007263	1.30878	1.08109	-0.636968
Psma5-NM_11967-mMR030285	1.30851	-0.338533	1.13524
Pcdhgb1-NM_33574-mMR029314	1.30719	-0.313267	-0.221228
2200001I15Rik-NM_183278-mMC012575	1.30715	0.851621	0.76809
4933402J24Rik-XM_131279-mMC008864	1.30706	-0.504961	0.179561
Casc3-NM_138660-mMC021135	1.30661	0.811764	0.836182
Ccl11-NM_11330-mMC010811	1.3062	0.504883	1.05073
Zdhhc3-NM_26917-mMR001437	1.30576	-0.464087	0.758282
Gabarapl1-NM_20590-mMC016474	1.30452	0.317064	1.42685
Olfr1018-NM_146586-mMC012826	1.30417	0.142502	1.23013
4930511J11Rik-NM_29070-mMC011281	1.30413	0.828965	0.857616
Ndufa8-NM_26703-mMC009639	1.30374	1.38658	0.645477
Adarb1-NM_130895-mMC010401	1.30351	0.371508	0.77947
mtDNA-completeGenome_10-mMO036010	1.30329	0.94053	1.1287
Asl-NM_133768-mMC008706	1.30191	0.84557	0.809752
Rpl30-NM_9083-mMC019757	1.30101	0.60359	1.3746
Slc37a2-NM_20258-mMC013442	1.30075	-0.263157	0.779797
Nol3-NM_30152-mMO035592	1.30067	0.102146	1.14925
Glrp1-NM_8132-mMC005966	1.30027	-0.649745	-0.228378
Card15-NM_145857-mMR030202	1.29928	-0.358947	0.269481
1810009O10Rik-NM_197989-mMR026321	1.29879	0.682649	0.967096
Mt1-NM_13602-mMC022171	1.2978	1.89577	2.55223
Rps26-NM_13765-mMC024439	1.29771	1.26939	1.82888
0710007G10Rik-No acc-mMC012475	1.29746	0.224361	-0.0141373
Apoa1bp-NM_144897-mMC013283	1.29728	-0.458117	0.0554459
6330406L22Rik-NM_27521-mMC008751	1.29614	0.420304	0.79664
AL033326-NM_19705-mMC016600	1.29611	0.844468	0.541228
Amhr2-NM_144547-mMC011583	1.29595	0.906485	1.34544
4930566A11Rik-No acc-mMC015634	1.2959	-0.108033	-0.033861
Spp2-NM_29269-mMC008974	1.29534	0.1849	1.58236
Zbtb4-XM_126150-mMC026306	1.29515	0.312271	0.375665
5730502D15Rik-NM_26485-mMC008138	1.29483	-0.0210401	0.574331
LOC330052-No acc-mMC011643	1.29451	0.778104	1.42825
Iqce-NM_28833-mMC005913	1.2945	1.03648	1.66923
Galk1-NM_16905-mMC015788	1.29432	0.196862	1.89094
Pdxp-NM_20271-mMC012808	1.29399	0.0265939	0.182139
Leng8-NM_172736-mMC001760	1.2933	0.258977	0.97767
Cln8-NM_12000-mMC024972	1.29324	0.23747	1.22826
A630039F14Rik-XM_146705-mMC014553	1.29299	-0.37999	-0.369957
Apex1-NM_9687-mMC016077	1.29225	-0.109056	0.662093
Cntn2-NM_11531-mMR030726	1.29167	-0.447317	1.15632
Cib3-XM_356089-mMC010902	1.29165	0.261747	0.776961
Ensa-NM_19561-mMR027872	1.2915	0.357598	0.471198
Tbrg4-NM_134011-mMC000853	1.29052	0.375248	-1.29438
4930542N06Rik-No acc-mMC015824	1.29039	-0.24257	-0.781848
Map2k4-NM_9157-mMC017623	1.29007	-0.170515	-0.422618
Abca15-NM_177213-mMC016154	1.29001	0.223523	0.473358
1810057E01Rik-NM_30749-mMC013885	1.28989	1.11963	0.161502
Map17-NM_26018-mMC016348	1.28938	0.298153	0.412245
[truncated: 3,827 more rows]

## Sheet: CPA
Name	cpa 1h	cpa 3h	cpa 5h
Cd97-NM_11925-mMC001744	2.49863	0.88429	-0.697227
Ube2e3-NM_9454-mMC016136	2.29449	0.352892	-0.0684136
2700049A03Rik-XM_126944-mMC017230	2.10093	-0.510769	1.18024
0610009J22Rik-NM_27859-mMC016808	2.07388	0.229331	-1.19927
1700112M01Rik-No acc-mMC012772	2.02245	-0.153604	0.589761
4930477O03Rik-No acc-mMC014843	1.99445	0.21771	-1.01588
AI316787-NM_199199-mMC014887	1.91884	-0.0292011	-0.435104
4930425K24Rik-No acc-mMC005492	1.91656	-0.203892	-0.704764
4930435E12Rik-XM_358794-mMC007702	1.89029	-0.122608	0.0392195
E2f3-XM_127250-mMC005085	1.86406	-0.378346	-0.469036
Sirt2-NM_22432-mMC014465	1.79668	-0.0690286	0.380613
Nrxn3-NM_172544-mMC016249	1.71176	-0.0788017	0.499364
6430537F04-No acc-mMC009992	1.67668	-0.0174224	-0.895991
Rph3a-NM_11286-mMC014416	1.58121	0.0294676	-0.733415
4933406J09Rik-No acc-mMC024694	1.50887	0.38158	-0.864799
D130027M04Rik-No acc-mMC001972	1.46577	0.392517	-1.0468
D830029L11-No acc-mMC005705	1.46365	-0.389139	0.0748268
Sstr4-NM_9219-mMC008252	1.4463	0.342953	-0.14294
Slc25a12-NM_172436-mMC014800	1.4214	0.263135	-1.05009
BC022146-NM_144872-mMC019333	1.41983	-0.317058	0.40576
Wnt11-NM_9519-mMC005121	1.36748	0.140567	-0.25441
C130036G08-NM_177735-mMC011576	1.35263	0.171778	-0.917299
B230219J02Rik-No acc-mMC016806	1.29597	0.0322728	0.0120702
Trpc4ap-NM_19828-mMC001693	1.28778	0.440704	-0.170441
BC061237-NM_198677-mMC019565	1.28076	0.158824	0.321056
AI851076-XM_110955-mMC015864	1.24806	0.200386	-0.206797
Zfp454-NM_172794-mMC014888	1.22236	0.34736	-0.55133
Rnf141-NM_25999-mMC024607	1.22217	0.46108	-1.28252
Mcf2l-NM_178076-mMC015184	1.22189	0.149913	-0.757581
Was-NM_9515-mMC009138	1.20253	-0.198862	-0.1759
Pcnt2-NM_8787-mMC009335	1.18492	-0.000976626	0.194568
Pacs1-NM_153129-mMC002809	1.17936	0.417099	-0.0660777
Ipo13-NM_146152-mMC010192	1.17795	0.384036	-0.764461
0710001B24Rik-NM_175118-mMC003018	1.16197	-0.186706	0.687345
Ranbp2-NM_11240-mMC000791	1.15346	-0.470828	-0.452066
Rarb-NM_11243-mMC014769	1.15166	-0.378646	-0.596355
Mapk14-NM_11951-mMC002605	1.14949	-0.306945	-0.597178
Grin2c-NM_10350-mMC010712	1.14047	0.488048	-1.11849
Zfp367-NM_175494-mMC014395	1.13029	1.06134	-1.27008
Nit1-NM_12049-mMO035662	1.12386	-0.374477	0.629117
Clk4-NM_7714-mMC002395	1.11826	0.351755	-0.628258
1500015A07Rik-No acc-mMC008718	1.10937	-0.18118	-0.267856
Kif3b-NM_8444-mMR029120	1.10752	-0.284821	-0.278621
Cdk5rap2-NM_145990-mMC019032	1.09771	0.0376551	-0.0862577
7530420F21Rik-XM_488915-mMC019421	1.07853	0.113305	0.414521
Fbxo31-NM_133765-mMC004905	1.0701	-0.0637634	-0.10143
Scgb3a2-NM_54038-mMC015338	1.0628	0.587539	-1.05423
Matn4-NM_13592-mMC000912	1.0607	0.191284	-0.422637
Rnf122-NM_175136-mMC000904	1.0606	0.0779251	-1.31332
2310008M10Rik-NM_25509-mMC005604	1.05771	-0.283427	-0.874069
Laf4-NM_10678-mMR028874	1.05447	0.131554	0.705866
Emp3-NM_10129-mMC008380	1.04976	0.245672	-0.922354
Rabgap1l-NM_13862-mMR026584	1.0453	-0.0130504	0.357872
Dntt-NM_9345-mMC012233	1.03886	0.741679	-0.810185
3110003A22Rik-NM_26534-mMC001967	1.0265	0.063016	-1.08357
1700061J23Rik-No acc-mMC017354	1.01743	0.0556931	0.195136
H2-DMa-NM_10386-mMC020812	1.01723	-0.082648	-0.551294
Tdrd1-NM_1002238-mMC016442	1.01723	-0.0659901	-0.685891
5033425B01Rik-No acc-mMC011504	1.01682	0.0207064	-0.748098
A730032D07Rik-XM_194983-mMC010002	1.00991	-0.140646	0.528271
Hist1h2bk-NM_175665-mMC022663	1.00771	0.524946	0.432872
Suclg2-NM_11507-mMC014613	1.00332	-0.20482	0.314481
Sepp1-NM_9155-mMC005384	0.993667	-0.566022	1.10835
Pygl-NM_133198-mMC007390	0.977162	0.325756	-0.5217
Atf7-NM_146065-mMC019196	0.97548	0.324754	-0.216622
Cfh-NM_9888-mMC002804	0.969327	-0.536522	-0.325895
5430432N15Rik-NM_172418-mMR030299	0.963185	-0.309934	-0.143494
Slc39a9-XM_484158-mMR031159	0.961611	0.274009	-0.553246
Fbxw11-NM_134015-mMC007406	0.956318	-0.150152	0.291922
H60-XM_136972-mMC019320	0.945403	0.337992	-0.813869
Ptpns1-NM_7547-mMC007932	0.940346	-0.176208	-1.09673
Col2a1-NM_31163-mMC003430	0.93758	0.516036	-1.77701
Rpl36a-NM_19865-mMC019197	0.932202	0.584629	0.446054
Plxnb1-NM_172775-mMC003547	0.928704	-0.0763189	0.239603
Dysf-NM_21469-mMR030255	0.923195	-0.173055	-0.984219
Samd11-NM_173736-mMC016989	0.898582	0.169873	0.39768
2300009A05Rik-XM_204313-mMC014132	0.897312	0.12449	0.797401
A630082K20Rik-XM_145254-mMC001616	0.896851	-0.555617	0.139752
2400006N03Rik-XM_126152-mMC010995	0.895736	-0.110622	0.390313
Plekha3-NM_31256-mMC008468	0.895671	0.134006	0.201009
1700056E22Rik-XM_484951-mMC002325	0.895128	-0.00853134	-0.729456
B230209C24Rik-NM_177235-mMC003848	0.892677	0.110453	-0.625967
Plp1-NM_11123-mMC008724	0.891427	-0.0137837	-0.808455
1700012A03Rik-NM_29587-mMC002078	0.890385	0.549164	-1.22485
Krtap9-1-NM_15741-mMC019537	0.886825	-0.0675921	-1.03369
2610029K21Rik-NM_25663-mMC002576	0.885563	-0.129396	-0.420756
Xpo6-NM_28816-mMC008063	0.882353	-0.152591	0.285983
Myh10-NM_175260-mMC014201	0.880895	1.093	0.595803
Bcl2a1b-NM_7534-mMR026911	0.878188	0.157076	-0.690917
2410016F19Rik-NM_26113-mMC014496	0.87653	0.238943	-0.711205
4930563J15Rik-No acc-mMC007182	0.875178	0.152686	-0.339659
Kif6-NM_177052-mMC019504	0.872172	0.222396	-0.843947
Clstn2-NM_22319-mMC010400	0.871949	-0.136042	-0.745808
Zmynd10-NM_53253-mMC003333	0.871542	0.401558	-0.973463
4921511C16-NM_183307-mMC003577	0.863099	0.16366	-0.578258
5730453H04Rik-No acc-mMC009911	0.86273	-0.216916	0.17783
2510003D18Rik-No acc-mMC015305	0.859927	0.378888	-0.114599
Kif4-NM_8446-mMC005059	0.855208	0.41307	-0.866671
Olfr1302-NM_146889-mMC005958	0.854022	-0.17575	0.0270744
Ap1s1-NM_7457-mMC007735	0.850486	-0.285363	-0.121692
Slc17a2-NM_144836-mMC003549	0.850041	-0.416231	0.0452235
4930442L21Rik-NM_26253-mMC012058	0.849843	0.416876	0.573364
Hadhsc-NM_8212-mMC011528	0.849516	-0.109325	-1.47227
mmu-miR-206.miRNA-Tagged-Template-No acc-mMO036015	0.845009	-0.143459	-0.559784
Ube1x-NM_9457-mMC019169	0.840969	-0.229649	0.319891
Nr5a1-NM_139051-mMC003137	0.839887	0.251329	-0.656041
BC051070-NM_178412-mMC019037	0.83796	0.0534901	0.615027
Fbxl10-No acc-mMC014980	0.83626	0.181751	-1.11276
6030419C18Rik-NM_176921-mMC005573	0.835543	-0.107091	-0.158995
9430067K09Rik-No acc-mMC025466	0.833394	-0.0122227	-0.285494
6030471H07Rik-No acc-mMC005234	0.831833	0.00943698	-0.147946
Mrps18b-NM_25878-mMC001104	0.831609	-0.385013	-0.038701
Ky-NM_24291-mMC003921	0.82677	-0.301236	-0.114911
Fdps-NM_134469-mMC003339	0.826519	-0.515019	0.171078
D430024F16Rik-NM_178698-mMC010212	0.826404	0.159315	-0.85843
2310061G22Rik-No acc-mMC011451	0.815038	-0.376279	-0.638146
Bnipl-NM_134253-mMC018467	0.813875	-0.191873	0.390223
Polr3f-NM_27417-mMR028624	0.808571	-0.125834	-0.314274
Galnt2-NM_139272-mMC006623	0.807795	-0.219397	0.0825577
Maff-NM_10755-mMC002660	0.807753	0.0581653	-0.0423095
Usp28-NM_175482-mMC003473	0.805881	-0.140115	0.967096
Ftcd-NM_80845-mMC003701	0.805449	-0.18714	0.949676
Sf3a3-NM_29157-mMC003637	0.804846	0.341276	-0.718208
Shbg-NM_11367-mMC003907	0.804234	-0.390767	0.320692
Htr2b-NM_8311-mMC018454	0.803902	-0.0135645	0.541217
2900092C05Rik-NM_28434-mMC015713	0.803256	-0.302335	1.00782
1700065O13Rik-XM_128550-mMC008141	0.803117	-0.165727	-0.859361
6330404F12Rik-No acc-mMC005982	0.803077	0.0689738	-0.343675
Emcn-NM_16885-mMC013889	0.802576	0.470672	-0.0814616
Rims4-NM_183023-mMC015732	0.801524	0.0654941	-0.0625769
Ak1-NM_21515-mMR031243	0.797384	0.737037	-1.08627
Pdk1-NM_172665-mMC012593	0.797245	0.127886	-0.500304
Ube2h-NM_9459-mMC014143	0.796999	0.222936	-0.467573
Cecr2-XM_489839-mMC007085	0.79046	0.123288	-0.201792
IGKV2-137-AJ231263-mMO036128	0.787896	0.207985	-0.33754
E230022H04Rik-NM_153515-mMR026839	0.782961	0.334359	-1.02902
H2-Bf-NM_8198-mMC003293	0.777202	-0.014843	1.23904
Sdhd-NM_25848-mMC010973	0.775279	-0.242913	0.704972
Ramp2-NM_19444-mMC007333	0.768467	0.189694	-0.764358
AI662250-NM_178926-mMC008686	0.768418	-0.007992	-0.908152
Fnta-NM_8033-mMC016633	0.765366	0.271053	-0.175993
Uvrag1-NM_178635-mMC012778	0.763343	0.144027	-0.0379409
Mtap1a-XM_194040-mMR028805	0.761973	0.247504	-0.936469
Ppp1cb-NM_172707-mMR029253	0.761838	0.766818	1.90786
2810407K09Rik-NM_26999-mMC000950	0.753158	-0.236558	-0.45411
Endogl1-NM_172456-mMC001636	0.748984	0.0909754	-0.188465
B2m-NM_9735-mMC006339	0.746696	-0.310319	2.00613
2400003B06Rik-NM_26211-mMC019180	0.745179	0.853709	-0.32456
Olfr1519-NM_146399-mMC008073	0.743024	-0.0618592	-0.13357
1200016B10Rik-NM_25819-mMC019286	0.741129	-0.0121982	0.837576
6030498E09Rik-NM_183126-mMC003090	0.741079	0.172708	-0.780103
2010107G12Rik-No acc-mMC008204	0.738964	0.115871	-0.402028
A430057M04Rik-NM_176925-mMC007927	0.73449	-0.0914237	-0.875253
Mgam-XM_133071-mMC003832	0.733233	-0.296333	-0.403458
Olfr1301-NM_146887-mMC015961	0.732055	-0.260039	0.382611
Rab18-NM_11225-mMC018203	0.731038	-0.297343	0.630628
6720454L07Rik-No acc-mMC010827	0.730632	-0.0577458	-0.435419
Slc17a6-NM_80853-mMC004694	0.727914	-0.115483	-0.320696
C230082I21Rik-No acc-mMC019004	0.727517	0.119928	-0.268567
Pigo-NM_20035-mMC014786	0.72549	0.221206	0.418575
Rspondin-NM_138683-mMC010970	0.723389	0.247711	0.848455
1200008N06Rik-XM_109598-mMC004265	0.72223	-0.267482	0.672704
1810044D09Rik-No acc-mMC004607	0.721755	0.429019	0.420282
Psmd4-NM_8951-mMC003324	0.720697	-0.238356	-0.721378
Tcf20-NM_13836-mMR030698	0.720494	0.435319	-1.23856
A130042O14Rik-No acc-mMC007708	0.719328	-0.140409	-0.647968
mt-Nd2-No acc-mMR030303	0.719257	-0.255145	2.87279
AW536289-No acc-mMC016273	0.717205	-0.0233783	0.0893266
Pcdhgc3-NM_33581-mMR027951	0.716159	-0.46241	-0.201634
D930020E02Rik-NM_173420-mMC004929	0.715091	-0.151671	0.250008
Ndufa10-NM_24197-mMR028106	0.710412	-0.0445871	0.100195
Olfr420-NM_146305-mMC012880	0.709123	-0.175615	-0.145718
4930429D17Rik-No acc-mMC016257	0.709052	0.131539	0.429536
Zfp162-NM_11750-mMC004404	0.708126	-0.219697	-0.112023
Klk11-NM_10640-mMC002526	0.707021	-0.14743	-0.308896
Mmd-NM_26178-mMC011047	0.706761	-0.343582	-0.121057
Icam1-NM_10493-mMC012010	0.705608	-0.136021	-0.803598
Arid3a-NM_7880-mMC013234	0.705568	-0.445192	0.217868
1700125D06Rik-XM_485446-mMC015245	0.70473	0.0310145	-0.0662766
BC061928-NM_172861-mMR029357	0.699266	-0.494117	-0.254678
Dpysl2-NM_9955-mMR029582	0.696078	-0.188908	-0.0675973
Itga8-NM_1001309-mMC002018	0.696018	-0.217914	-0.393593
Ndufs3-XM_130347-mMR029128	0.693951	-0.257806	-0.615355
Btbd9-NM_172618-mMC008544	0.691814	-0.0498721	-0.390611
9530059J11Rik-No acc-mMC019387	0.69176	0.236209	-0.780218
C030044M21Rik-No acc-mMC000922	0.682396	-0.212524	-1.20115
Snrp116-NM_11431-mMC005673	0.681892	-0.199903	-0.522489
2810452K22Rik-NM_26048-mMC008404	0.681742	-0.131031	-0.706118
Chd2-XM_145698-mMC024985	0.681237	0.0696347	-0.218292
Plekhm1-NM_183034-mMC002927	0.680489	-0.205692	-0.329535
Cdca4-NM_28023-mMC001930	0.680467	-0.248417	0.181894
D6Ertd253e-NM_178608-mMC016608	0.677234	0.582722	0.71513
H2-M10.2-NM_177923-mMC016208	0.677199	0.740032	-0.99361
1300010K09Rik-NM_138303-mMC004630	0.676365	-0.229124	-0.992571
Sas-NM_25982-mMR030484	0.674701	-0.27756	0.0428302
Rnpc1-NM_19547-mMC008296	0.674663	-0.146863	-0.254083
Rbp1-NM_11254-mMC008631	0.670605	-0.293819	0.539758
C630049M13-NM_172832-mMC006161	0.668321	0.181095	0.687974
5033430J17Rik-No acc-mMC006981	0.66781	0.305274	0.0204361
Hapln3-NM_178255-mMC012555	0.666652	0.435397	0.256142
Tcta-NM_133986-mMC003492	0.665897	-0.266342	-0.200546
Gpiap1-NM_16739-mMC007801	0.664064	-0.096672	-0.779977
4930417G10Rik-XM_484109-mMC009304	0.6627	0.130539	0.190067
Vps45-NM_13841-mMC006933	0.662376	0.182293	-0.653991
1700024K14Rik-NM_30179-mMR026464	0.658328	0.239497	-0.0346419
4930543D07Rik-No acc-mMR029593	0.657719	0.675502	0.122768
Aurkb-NM_11496-mMC000969	0.657045	-0.494932	0.0813176
Myoz2-NM_21503-mMC004383	0.656412	0.130037	-0.591427
4930542N06Rik-No acc-mMC015824	0.655995	0.274183	-0.709896
A330044H09-No acc-mMC010300	0.655711	0.256305	-0.780263
4930506C02Rik-NM_175216-mMR030361	0.655364	-0.289491	-0.653924
Commd6-No acc-mMC002582	0.654843	0.0110383	-0.82318
Nppc-NM_10933-mMC001706	0.653769	-0.559187	-0.162432
A730091E23Rik-No acc-mMC008927	0.652024	-0.197027	-0.0114709
5830445O15Rik-XM_485053-mMC021800	0.651917	0.82724	0.163537
Kif2b-XM_126653-mMC003551	0.651802	0.25575	-0.28425
Ddah1-NM_26993-mMR027941	0.650773	0.165238	-0.381471
2310058D17Rik-No acc-mMC008647	0.650681	-0.276315	0.0710359
4632411B12Rik-NM_172652-mMC018705	0.65045	-0.0436145	-0.50257
1700030N03Rik-No acc-mMR030338	0.649671	0.00571861	-0.116244
A530065E19Rik-NM_145433-mMC002155	0.648544	-0.330407	0.396829
2310015N21Rik-NM_181397-mMC010677	0.647566	-0.165108	0.376438
Scarb2-NM_7644-mMC007578	0.646925	0.103674	0.610095
BC046386-NM_181422-mMC007219	0.645335	-0.160413	-0.394313
Espl1-XM_484508-mMR028676	0.644346	-0.420737	-0.128489
Hoxc13-NM_10464-mMC004441	0.643886	0.0357531	-0.369699
Eif1a-NM_10120-mMC013893	0.641389	-0.044591	0.200733
A930019J01Rik-No acc-mMC005186	0.640999	-0.308193	0.270027
A630082K20Rik-XM_145254-mMR030139	0.637389	-0.4746	-0.481062
Stc2-NM_11491-mMR027223	0.637226	-0.123127	-0.809043
Vps52-XM_110209-mMC003523	0.636562	-0.526464	0.994799
Igf1-NM_10512-mMC021536	0.636091	0.623958	0.336326
Tegt-NM_26669-mMC002546	0.635298	-0.109388	1.81329
Lrrc10-NM_146242-mMC008476	0.635233	0.113116	0.165257
Gfap-NM_10277-mMR030764	0.633339	0.0615599	0.526756
IGHV9S7-L14367-mMO036183	0.632677	-0.138452	-0.709704
2210417D09Rik-NM_25620-mMC004012	0.630274	-0.0973165	-0.655968
Insl6-NM_13754-mMC015293	0.629626	-0.0740163	-0.535575
1110012J17Rik-NM_172963-mMC012484	0.627296	-0.0896229	0.478158
E030041M21Rik-NM_29166-mMC004896	0.626782	0.478519	-1.07771
Eppk1-NM_144848-mMC012358	0.623421	-0.155483	0.213916
6330408A02Rik-NM_177312-mMC013268	0.622543	0.301387	-0.307642
Stx8-NM_18768-mMC024855	0.620208	-0.34362	0.00798476
D330022H12Rik-No acc-mMC004739	0.619629	-0.0411861	0.175004
6030439D06Rik-No acc-mMC002734	0.615478	-0.275838	-0.37216
4933427C19Rik-No acc-mMC011609	0.614679	-0.0357155	0.578088
Chrna9-XM_132045-mMC007903	0.614074	0.85589	0.0743534
Cobl-NM_172496-mMC004943	0.61401	-2.16047	-0.0092998
2310051M13Rik-NM_27344-mMC006703	0.613798	0.391595	-1.31367
5730509C05Rik-NM_197940-mMC001606	0.612632	-0.305741	-0.311122
2410004A20Rik-NM_25890-mMC019253	0.611899	-0.0747721	-0.328265
Nfkbib-NM_10908-mMC008604	0.611275	0.481653	-0.0901888
Eef2k-NM_7908-mMC008676	0.610952	-0.0857291	-0.479791
Ebf1-NM_7897-mMR029014	0.609884	-0.463964	-0.147599
scl0000r-REVCOMP-mMO036052	0.609693	0.0887012	-0.778501
4930430F08Rik-NM_175128-mMC002361	0.609042	0.0152036	-0.693108
B230308P20Rik-No acc-mMC004563	0.608805	0.0911761	-0.352389
Cd200r2-NM_206535-mMR029370	0.608249	-0.216295	-0.394735
Il11ra2-NM_10550-mMR027838	0.607466	-0.410442	-0.141647
4931428L18Rik-NM_27637-mMC006959	0.606286	-0.0872989	-0.0510053
Fmo2-NM_18881-mMR029223	0.606143	-0.179368	-0.190453
Abhd1-NM_21304-mMC012968	0.605628	0.740241	-0.776804
1700019O17Rik-XM_484891-mMC006262	0.605618	-0.29879	0.300442
A330106M24Rik-No acc-mMR030455	0.604819	-0.201039	-0.455584
Gabpb1-NM_10249-mMC012530	0.604074	0.258788	-0.37887
Sfrs2-NM_11358-mMC003820	0.603788	-0.0953199	-0.402489
BC025600-NM_146162-mMC007228	0.603781	-0.283793	-0.780176
Smad2-NM_10754-mMC005128	0.603626	-0.285723	-1.17276
Pdzk2-NM_133226-mMC011393	0.602611	-0.249987	-0.362825
4921511H13Rik-XM_128377-mMC012419	0.602446	0.0655808	0.10887
D230039L06Rik-NM_177724-mMC002279	0.601388	0.0352287	-0.824171
Gm83-NM_198606-mMC019101	0.60122	-0.154798	-0.519815
5830444F18Rik-No acc-mMC003581	0.598361	-0.410662	-0.433877
Cdc42ep3-NM_26514-mMC004418	0.59732	0.0637749	-0.475107
Nola3-NM_25403-mMC010726	0.597148	0.0638495	-0.0873588
3230401I01Rik-NM_26140-mMC007026	0.59534	-0.12415	-0.226789
Hoxc8-NM_10466-mMR029967	0.594927	-0.362334	0.0305672
Cyb561d1-XM_485295-mMC009680	0.594794	0.243804	-1.18057
2700088M07Rik-No acc-mMC004270	0.593141	0.177959	-0.74191
9130020L07Rik-NM_207208-mMR028873	0.591373	-0.63407	-0.23678
Scd1-NM_9127-mMC010577	0.591041	-0.326705	2.20581
Mcph1-NM_173189-mMC001745	0.590903	-0.277454	0.217884
Stoml1-NM_26942-mMC017670	0.590737	0.656584	-0.408374
Edaradd-NM_133643-mMC003910	0.590268	-0.0395445	-0.85511
Rab11a-NM_17382-mMC015258	0.589995	0.502035	-0.0149486
9430096G21Rik-No acc-mMC014263	0.589892	0.525846	-0.623717
1700013N06Rik-No acc-mMC012431	0.589862	-0.299881	-0.490062
9130413I22Rik-NM_26242-mMC013163	0.588623	-0.156643	0.0783418
Chrng-NM_9604-mMC004767	0.588328	-0.385316	0.22559
Plg-NM_8877-mMC002728	0.587844	0.0404971	0.0814629
Penk1-NM_1002927-mMC000780	0.586973	-0.242794	-0.0957423
C030017G13Rik-No acc-mMC014514	0.586969	0.261492	-0.0302641
Asb1-XM_149066-mMC004674	0.586581	-0.42475	-0.0112334
4931412I15Rik-No acc-mMC011539	0.585663	0.553179	0.430156
Hspca-NM_10480-mMR028925	0.585393	-0.528076	-0.975573
C030004G16Rik-No acc-mMC018892	0.584171	0.0142701	0.533068
Habp2-NM_146101-mMC004854	0.583731	-0.0296472	-1.00576
Mrgprb2-NM_175531-mMC011266	0.583551	-0.112332	0.902738
Jam3-NM_23277-mMC010410	0.583087	-0.159163	0.0360411
Birc7-XM_283820-mMC005642	0.582917	-0.279342	0.437621
BC065120-NM_183208-mMR001219	0.581638	0.0362942	-0.473441
1700039O17Rik-No acc-mMC006797	0.579925	0.357821	-0.0203777
Epb4.1l1-XM_487678-mMC004495	0.57958	-0.369798	-0.385972
2700038N03Rik-NM_27356-mMC003974	0.578693	-0.192814	0.529059
1700039E22Rik-No acc-mMC009494	0.578563	0.0351421	-1.26812
Jph1-NM_20604-mMC010058	0.577889	0.0676684	-0.795842
4930488B01Rik-No acc-mMC018168	0.577748	0.213005	-1.03401
A430105I19Rik-NM_1001982-mMC002357	0.576086	-0.0723902	-0.624923
Dusp2-NM_10090-mMC014277	0.574643	-0.0387697	0.345864
Ap4s1-NM_21710-mMC013278	0.572926	0.196992	0.345878
1700003F12Rik-No acc-mMC017903	0.571964	0.262635	-0.571769
Dnaja4-NM_21422-mMC005397	0.57126	-0.377666	-0.0954759
Ccdc3-XM_129987-mMC017431	0.570957	0.0661835	-0.574591
Lalba-NM_10679-mMC015193	0.569786	0.129521	-0.0614265
A430068E04Rik-No acc-mMC004285	0.569579	-0.222007	0.173648
Ear5-NM_19398-mMC011830	0.569284	-0.103091	0.93766
2310043P16Rik-No acc-mMC017673	0.569184	-0.38745	0.234817
Ube3c-NM_133907-mMC012763	0.56903	-0.0467352	0.403857
Mlh3-XM_484162-mMC013895	0.568366	-0.159397	0.3769
D630018G21Rik-No acc-mMC006376	0.567034	-0.267931	-1.21553
Prcc-NM_33573-mMC001078	0.567002	-0.294861	-0.286638
Hmgb2l1-NM_178017-mMC017574	0.566366	0.0372503	-0.585808
F730002C09Rik-No acc-mMR029651	0.565974	-0.25494	-0.267077
1700015C15Rik-No acc-mMC013962	0.563196	-0.0909928	-0.790259
1110002H13Rik-NM_25376-mMC004772	0.562273	-0.00764308	-0.731088
Scn3a-XM_141275-mMC002852	0.562246	-0.044257	-1.11538
Dlx1-NM_10053-mMC005685	0.562194	0.0450153	-0.207725
Lypla3-NM_133792-mMC002371	0.562126	-0.195551	-0.0323863
P2ry10-NM_172435-mMC006984	0.561674	-0.124772	-0.0708611
Dpysl2-NM_9955-mMC006656	0.561566	0.0434713	-0.758026
2810003K23Rik-XM_126677-mMC011188	0.560976	0.231196	-1.09881
4930565N06Rik-No acc-mMC017085	0.560874	0.0639968	-0.971362
Capn12-NM_21894-mMC006969	0.560116	0.0882251	-0.231755
Podxl-NM_13723-mMC014101	0.559645	-0.185368	-0.414228
D430030K24Rik-NM_178732-mMR028973	0.559319	-0.282709	-0.637811
Grm6-NM_173372-mMC014908	0.558692	-0.0161128	-0.570198
Krtdap-No acc-mMR029970	0.558502	-0.159662	1.09872
Mcf2l-NM_178076-mMR028928	0.557022	0.731747	-0.955985
Aqp1-NM_7472-mMC005710	0.556461	-0.242232	-1.00086
Gabarapl1-NM_20590-mMC016474	0.556148	0.471849	0.801369
Dgcr8-NM_33324-mMC014084	0.555509	-0.160806	0.319973
Myom3-XM_485520-mMC015834	0.555303	0.0620507	0.526461
Fut8-NM_16893-mMC017322	0.553939	-0.0841142	-0.135835
2400009B08Rik-XM_358687-mMC004496	0.553846	0.0922998	-1.00726
Pcdh21-NM_130878-mMC016470	0.552445	1.02724	-0.3869
Csrp3-NM_13808-mMC017773	0.551969	-0.219217	0.409618
Nrxn3-NM_172544-mMR028404	0.551968	-0.387327	0.377695
AF529169-NM_153509-mMC019322	0.55112	-0.493	1.54759
E2f7-NM_178609-mMC002076	0.550715	-0.29135	-0.469136
Gpx5-NM_10343-mMC004874	0.549567	-0.380215	0.88957
Phex-NM_11077-mMC004927	0.548014	0.0128573	-0.0451066
Sh3tc1-NM_194344-mMC001603	0.545612	-0.220156	0.0484851
Fkbp4-NM_10219-mMC001602	0.545409	-0.37768	-0.0556305
A930035D04Rik-No acc-mMC000812	0.54529	-0.304366	-0.374926
6530407C02Rik-NM_133853-mMC010638	0.54463	0.281495	-0.288916
B230333C21Rik-XM_111900-mMC004816	0.543873	-0.141851	-1.40135
4930413F20Rik-No acc-mMC010963	0.543225	-0.0101999	0.983367
1700001E04Rik-NM_29288-mMR030769	0.541943	0.0946769	0.288033
Clmn-NM_53155-mMC006834	0.539552	-0.464004	0.0777333
Hap1-NM_10404-mMC004559	0.539454	-0.121609	-0.540947
R3hdm-NM_181750-mMC005617	0.538496	-0.170015	0.149817
Hnrpul1-NM_144922-mMR027494	0.537987	0.174667	-0.868977
1700106N22Rik-XM_355034-mMC019241	0.536881	0.213363	0.0793935
A630049H14Rik-No acc-mMC002372	0.536118	-0.0554793	-0.998294
D13Bwg1146e-NM_29879-mMR027837	0.53501	0.00323744	-0.294397
Slc22a12-NM_9203-mMC002957	0.534812	0.383576	-0.613057
1110058L19Rik-NM_26503-mMC011327	0.533819	0.529406	-1.09139
Map3k3-NM_11947-mMC019107	0.532663	-0.25473	0.259321
2810405F17Rik-No acc-mMC014240	0.532057	-0.115361	-0.491314
Sema5a-NM_9154-mMC010411	0.531809	0.19298	0.549229
E230025E14Rik-No acc-mMC001817	0.531536	-0.461807	-0.104165
Tm4sf5-NM_29360-mMC016145	0.530335	0.255588	-0.0245725
Etfa-NM_145615-mMR029444	0.529151	0.113554	-0.736485
2310075G12Rik-NM_27162-mMC015685	0.527751	-0.261166	0.348757
Pla2g2a-NM_11108-mMC019076	0.527316	0.192245	0.307772
0710001P18Rik-NM_26720-mMC011225	0.526204	0.6846	-0.197844
Eppb9-NM_13717-mMC011540	0.525674	0.0514061	0.847357
Hemt1-NM_10416-mMR026251	0.525498	0.0379902	-0.200771
H2-Q1-NM_10390-mMR029512	0.525062	-0.0115362	-0.884322
4930518I15Rik-No acc-mMC002500	0.524082	0.146218	-0.662329
D230002A01Rik-NM_176904-mMC011799	0.524046	-0.386615	-0.861539
D430002O22Rik-No acc-mMC014734	0.522682	-0.190138	-0.976146
2700087H15Rik-NM_27422-mMC008286	0.522328	-0.000805846	-0.561127
Dpp6-NM_10075-mMC003167	0.521146	-0.346916	-0.539386
Pou2f3-NM_11139-mMC021434	0.518313	0.166316	-0.368269
Ltb4dh-NM_25968-mMC002561	0.518121	-0.177408	-0.859484
Fzd10-NM_175284-mMC016792	0.517988	-0.19839	-1.58881
C230007H23Rik-No acc-mMC011925	0.516486	-0.201693	0.113275
Cyb561-NM_7805-mMC010012	0.516455	0.294843	-0.0456233
Atrx-NM_9530-mMR030675	0.516008	-0.0404148	-0.591535
D130004A15Rik-No acc-mMC002751	0.515927	0.60593	-0.800249
6030452D12Rik-NM_177904-mMC014069	0.515206	0.162052	0.170341
Cspg5-NM_13884-mMC011589	0.514975	0.335983	0.15758
Klf7-NM_33563-mMC007388	0.514368	-0.442034	0.213494
Gja10-NM_10289-mMC013040	0.514172	0.178344	-0.896302
H2-K1-NM_1001892-mMR026882	0.513966	-0.216967	0.569568
Slc27a3-XM_130954-mMC009238	0.513345	-0.32918	-0.327833
Rgs12-NM_173402-mMC010457	0.512712	-0.0963492	0.551652
Rnf166-XM_134599-mMC017757	0.511097	0.0471969	0.236919
Fbxo44-NM_173401-mMC006211	0.510776	-0.40809	0.139283
Mr1-NM_8209-mMC004476	0.509591	0.283727	-0.913481
Tnc-NM_11607-mMC019146	0.50945	0.199671	0.514168
Gtl2-NM_144513-mMO035566	0.508813	-0.554463	0.52085
Mpv17l-NM_33564-mMC007519	0.507631	-0.161908	0.0648785
BC059177-NM_198248-mMC004967	0.506556	-0.237978	-0.17063
Zap70-NM_9539-mMC019091	0.506472	-0.365999	-0.0796503
Psmd2-NM_134101-mMR029983	0.505792	0.0352198	-0.658456
4921517J23Rik-XM_133714-mMC014350	0.505274	0.362995	-1.36248
Actl7a-NM_9611-mMC014571	0.503575	-0.220387	-0.793586
Rfrp-NM_21892-mMC012477	0.50349	-0.0522633	-0.477211
Cp-NM_7752-mMR027675	0.503257	0.417087	-0.73534
BC066107-NM_207245-mMC019323	0.50295	-0.0616004	0.268352
4930578M01Rik-No acc-mMC004033	0.502906	0.0789882	0.279033
Ankrd2-NM_20033-mMC003996	0.502308	-0.230585	-1.16738
Ssr1-NM_25965-mMC010500	0.501237	0.0882534	0.0123224
E030024N20Rik-No acc-mMC013137	0.500586	-0.264137	-0.562976
3110045G13Rik-NM_28460-mMC004446	0.500348	-0.240703	-0.158556
Gsto1-NM_10362-mMC004833	0.500271	-0.274973	-0.112778
4933430H15Rik-XM_135711-mMC009620	0.500056	0.245803	0.498402
4933402J15Rik-No acc-mMC017895	0.498394	0.237166	0.7337
4930479M11Rik-NM_183108-mMC002205	0.497191	-0.26287	0.219139
Gpr21-NM_177383-mMC003115	0.496811	-0.260556	0.80213
Npy2r-NM_8731-mMC008879	0.496604	-0.190658	-0.306274
Atp6v1e1-NM_7510-mMC005855	0.496104	-0.0502183	-0.0390117
2900060B22Rik-No acc-mMC024828	0.495981	-0.111221	-0.314154
Glrp1-NM_8132-mMC005966	0.495702	-0.0200846	-0.948629
Rhod-NM_7485-mMC003698	0.495483	0.315713	0.32331
Fbs1-XM_284344-mMC005308	0.495098	-0.451733	-0.325092
8030431J09Rik-No acc-mMC014951	0.49458	-0.0202605	-0.0902051
BC016188-NM_145970-mMC004698	0.49446	-0.0279528	0.396133
Syt8-NM_18802-mMC003504	0.494316	0.250341	-0.753216
Plcd3-NM_152813-mMC003590	0.493581	0.26214	-1.19525
Olfr29-ps1-No acc-mMC009524	0.493539	-0.124576	0.0999107
2010009L17Rik-NM_25630-mMC003476	0.49157	-0.0541346	-0.14704
Rpl27a-NM_11975-mMC013122	0.490905	0.176647	0.577546
Myo5a-NM_10864-mMC005221	0.489986	0.0554234	-0.862123
B230333C21Rik-XM_111900-mMR029062	0.489101	-0.32872	0.148085
Kpna4-NM_8467-mMC011465	0.488253	0.00726511	0.523989
5530402G07Rik-No acc-mMC015470	0.488156	0.653296	0.626361
18S-rRNA_X00686-mMO035999	0.487174	-0.178736	-2.4938
A330033J07Rik-No acc-mMC002551	0.486094	0.652015	-0.00776681
BC055368-NM_183017-mMR030651	0.486009	-0.232536	-0.402808
Masp1-NM_8555-mMC010420	0.485477	-0.00367729	-0.713071
Chrnd-NM_21600-mMR029861	0.485125	-0.0614939	-0.743517
Ptgfrn-NM_11197-mMC004292	0.48504	-0.290193	-0.0471505
1700113H21Rik-No acc-mMC009985	0.485004	-0.366143	-0.188493
B4galt5-NM_19835-mMC018248	0.484105	-0.080369	-0.00302965
Slc5a6-NM_177870-mMC014041	0.483652	-0.196872	0.132767
Set7-NM_80793-mMC003171	0.483129	-0.551968	-0.508141
Adamts2-NM_175643-mMC009994	0.482603	0.24677	0.475843
AW822216-NM_178884-mMC010804	0.481783	0.204812	-0.787255
8430411H09Rik-NM_26813-mMC010688	0.481345	0.394125	-0.867243
Brpf1-NM_30178-mMC018872	0.480131	0.534801	-1.25047
Wsb2-NM_21539-mMC001122	0.479226	-0.135542	0.406246
1190003J15Rik-XM_133915-mMC011753	0.478914	0.0171044	0.190939
D330023I04Rik-No acc-mMC019026	0.478836	-0.299209	0.766471
2210006M16Rik-NM_29727-mMC012097	0.47865	-0.0341375	0.425199
Stk22b-NM_9436-mMC024919	0.477481	-0.0858481	-0.325511
Tcp1-NM_13686-mMC015104	0.477022	-0.447715	0.326238
Sort1-NM_19972-mMC018330	0.476672	-0.300042	-0.00462103
BC012016-XM_484594-mMC009908	0.476091	-0.180232	0.433979
Mppe1-NM_172630-mMC007294	0.475232	0.0957719	0.042306
Tpx2-NM_28109-mMC008389	0.474387	-0.0467264	-0.207305
Arhgef12-NM_27144-mMC009054	0.47409	-0.135581	0.69462
Scn4a-NM_133199-mMC016581	0.473646	-0.180329	0.463926
2310033P09Rik-NM_24210-mMC005483	0.472719	0.130228	-0.212273
A130022D17Rik-No acc-mMC015355	0.472041	0.428258	0.460298
Daam1-NM_172464-mMR030464	0.47204	-0.0546389	-0.896573
2610318N02Rik-NM_183287-mMR001238	0.471827	0.267157	-0.838682
C130022K22Rik-NM_172730-mMC010760	0.471528	-0.308206	-0.626462
9530071D11Rik-No acc-mMC019295	0.471038	0.0415631	0.0435625
5730578N08Rik-NM_25693-mMC014835	0.470745	-0.193915	0.0867735
Kcnn2-NM_80465-mMC024399	0.469902	0.265438	-0.636505
4933436N17Rik-XM_488671-mMC014748	0.466583	0.530396	-0.0417535
4930506C02Rik-NM_175216-mMC012666	0.466351	-0.149112	0.184299
0610039D01Rik-NM_26307-mMC003948	0.466304	-0.154895	-0.0487844
4930503H13Rik-No acc-mMC014003	0.46621	0.262399	-0.0524112
Anapc1-NM_8569-mMC014986	0.464775	0.134227	0.162263
5730409K12Rik-No acc-mMC016093	0.464442	-0.250547	0.285887
Gla-NM_13463-mMC006900	0.464171	-0.28413	-0.264001
BC027092-No acc-mMR029327	0.462759	0.168547	-0.814311
D12Ertd647e-NM_26790-mMC007149	0.462098	0.107973	-0.0603629
Cpa5-NM_144537-mMC009114	0.461392	0.303661	-0.297055
Hhip-NM_20259-mMR029469	0.461209	-0.421141	-0.240461
4931406O17Rik-XM_486260-mMC002177	0.460612	-0.0485872	-0.899844
2310043D23Rik-No acc-mMC005676	0.460502	-0.329101	-0.369493
5330439C02Rik-XM_484070-mMC004271	0.460273	0.0118886	-0.453293
Ptpn11-NM_11202-mMC000988	0.46012	-0.117082	-0.845283
6820402O20Rik-XM_133187-mMC009800	0.459885	-0.00303309	0.0496278
1700095G12Rik-XM_126335-mMC002188	0.459517	-0.41385	0.326939
Snx26-NM_178252-mMC024719	0.458088	-0.148873	-0.153229
Pace4-XM_355911-mMC002280	0.457435	-0.480635	-1.04567
4933428F06Rik-No acc-mMC019077	0.456023	0.128716	0.103146
Adar-NM_19655-mMC005148	0.455671	-0.334391	-0.682898
Acsl4-NM_19477-mMR030982	0.455128	-0.148935	0.249561
BC028528-NM_153513-mMC006746	0.453893	0.0376816	0.0991899
Pink1-NM_26880-mMC007565	0.453642	-0.204332	-0.0319628
Disp2-NM_170593-mMC010039	0.452198	-0.254012	0.0270196
Olfr1477-NM_146696-mMC019410	0.451844	-0.0371948	0.274918
Mkrn1-ps1-No acc-mMC010051	0.451194	-0.437986	0.644758
Bccip-NM_25392-mMC008816	0.451018	0.382038	-0.681383
Ilk-NM_10562-mMC021128	0.451017	-0.0105838	-0.30029
Wnt9a-NM_139298-mMR028111	0.450489	0.572741	-0.673308
5230401M06Rik-No acc-mMC008519	0.450029	-0.25519	-0.488115
Mki67-XM_133912-mMC016609	0.449973	-0.0365721	0.390413
Serpina3n-NM_9252-mMC025688	0.449309	-0.571123	0.72451
2310007B03Rik-NM_172411-mMC004410	0.449277	-0.197533	0.0112923
9430088N01Rik-No acc-mMC007664	0.448165	0.0371375	-0.400114
Hpvc2-NM_8283-mMC017729	0.447784	-0.415907	0.798137
Kcnj10-NM_20269-mMC012479	0.44763	-0.0284884	-0.966246
Tbxa2r-NM_9325-mMC007504	0.447292	-0.0744565	-0.000532554
C1rl-NM_181344-mMC014441	0.447203	0.0503232	-0.234203
1200016G03Rik-XM_283319-mMC008760	0.446865	0.0165877	0.361722
Rhbdf1-NM_10117-mMC005540	0.446717	0.0404093	-1.23854
Slc24a4-NM_172152-mMR029124	0.446012	-0.112349	-0.813033
4930405G09Rik-No acc-mMC013053	0.445468	-0.0597375	-0.11903
Chchd1-NM_25366-mMC011407	0.444518	-0.235579	0.384624
D3Ertd300e-NM_19995-mMR028503	0.444501	0.123135	0.132776
4933425B07Rik-No acc-mMC009426	0.443247	-0.000271003	0.156917
Commd10-NM_178377-mMC015709	0.443074	0.132162	-0.0533964
Sncg-NM_11430-mMC002337	0.442893	0.481635	-0.683584
Stk3-NM_19635-mMC007642	0.442814	-0.0210034	0.481642
1110038D17Rik-XM_483920-mMR030678	0.441168	-0.275555	0.0594512
C430041B13Rik-No acc-mMR029197	0.441076	-0.0122067	-0.365718
9530043G02Rik-NM_175426-mMC012978	0.440752	0.401865	0.268141
AK036573-No acc-mMR001486	0.440723	0.0404615	0.0906296
9630002A11Rik-No acc-mMC018198	0.440011	0.0954055	0.477704
Gpr158-NM_1004761-mMC013869	0.439508	0.150089	-0.173841
2300002D11Rik-XM_149530-mMR027935	0.438893	-0.429273	0.693576
Mrpl38-NM_24177-mMC001891	0.43864	-0.0512017	-0.573817
AI844366-NM_177906-mMC003322	0.438352	-0.540718	-0.218709
Cnnm2-NM_33569-mMR029608	0.438171	-0.089925	-0.720493
Ian3-NM_146167-mMC019339	0.438022	-0.032515	0.263956
D6Wsu163e-NM_138594-mMC013667	0.436989	0.170759	-0.289965
A430054B03-No acc-mMC005432	0.436479	0.486655	-1.08419
BC027246-NM_146218-mMR030881	0.436225	-0.326858	0.162851
Mrps12-NM_11885-mMC006418	0.434847	-0.20579	-0.284432
Neu4-NM_173772-mMC008587	0.434808	-0.219688	-1.21052
Snn-NM_9223-mMC011718	0.43462	-0.0708068	0.03812
B230315M08Rik-NM_170758-mMC015924	0.434175	0.012743	0.442645
1110055L24Rik-NM_25422-mMC005582	0.433637	-0.0164251	0.380693
C030002N13Rik-NM_145550-mMC007195	0.433248	-0.220566	0.0573097
7030401O21Rik-NM_198035-mMC008638	0.432985	-0.0174191	-0.500894
Cyp24a1-NM_9996-mMC011550	0.432969	0.151623	-0.60452
Cd79b-NM_8339-mMC016328	0.43239	-0.080244	-0.0821426
Usp26-NM_31388-mMC006750	0.431277	-0.36734	0.30493
Il13-NM_8355-mMC018243	0.430195	-0.23842	0.281312
1810008A18Rik-NM_133998-mMC015743	0.430085	0.120442	0.243258
Ccpg1-NM_28181-mMR027450	0.429035	-0.13048	-0.0137977
Abcc2-NM_13806-mMC015862	0.428906	0.107657	-0.877764
Abcd3-NM_8991-mMC009570	0.428868	-0.21519	0.591827
3010026O09Rik-NM_26543-mMC019483	0.428396	-0.47317	0.183845
Rnf148-No acc-mMC008976	0.428335	0.0969399	-0.534468
Magea4-NM_20280-mMC015640	0.427752	-0.143886	-0.735078
2410088K16Rik-XM_149067-mMC017663	0.427525	-0.106069	0.731347
1810018F18Rik-NM_28795-mMC026142	0.427398	-0.0677524	-0.6379
1700020I14Rik-XM_488956-mMR030528	0.427245	-0.281673	-0.0303785
Tcfe3-NM_172472-mMC002857	0.427087	-0.31447	-1.03063
Asxl1-XM_149245-mMC017742	0.426645	0.0630063	-0.839842
Atp6v0b-NM_33617-mMC017957	0.425973	-0.0822043	-0.201674
4833422F24Rik-NM_29021-mMC014066	0.425655	0.124606	0.445481
Csnk2a1-NM_7788-mMC015208	0.425618	-0.569148	-1.30991
Pdzk4-XM_359337-mMC002398	0.425137	-0.489939	0.144052
4930555G21Rik-No acc-mMC015268	0.424109	0.452957	-0.789717
Aldh6a1-NM_134042-mMC006965	0.423631	-0.0798624	1.0152
Hint2-XM_143732-mMC008110	0.423571	0.218294	-0.0270316
A630035G10Rik-No acc-mMC015811	0.423332	0.256853	0.719563
BC025519-XM_110101-mMC006095	0.422957	-0.00734659	0.172013
4930441O14Rik-NM_26649-mMC016123	0.422765	0.0293824	0.170002
4921513D23Rik-No acc-mMC002241	0.422219	-0.258476	-0.599143
Bcl2l12-NM_29410-mMC004501	0.42206	0.0157633	-0.703813
1700019B01Rik-XM_133591-mMC007421	0.421366	-0.26905	-0.99806
4933426M11Rik-NM_178682-mMC003886	0.421059	-0.274816	-0.0841574
Fgf18-NM_8005-mMR030823	0.419054	-0.174312	-0.501019
1300019C06Rik-NM_25832-mMC009076	0.418953	-0.402527	-0.429406
A830006F12Rik-NM_177164-mMR026498	0.418738	-0.169558	-0.962427
Hdac11-NM_144919-mMC002230	0.418473	-0.0126676	-0.733686
Anp32b-NM_130889-mMR030660	0.4184	-0.293602	-0.989488
9630054F20Rik-NM_173784-mMC016816	0.418373	-0.119864	-0.255845
Tff1-NM_9362-mMC003562	0.417093	0.0742948	-0.878633
4933415A04Rik-No acc-mMC009334	0.416877	-0.0550754	-0.974661
Slc23a3-NM_194333-mMC019306	0.416721	0.143692	-0.0454913
6330530A05Rik-NM_172383-mMC025692	0.415279	-0.204137	-0.44893
1110014K05Rik-NM_28622-mMC016594	0.415259	-0.135407	0.126526
A730011L01Rik-NM_177394-mMR029177	0.414553	-0.335725	0.24867
Ubn1-XM_489503-mMC008990	0.414421	0.146015	-0.629304
Tex19-NM_28602-mMC006724	0.414058	-0.480477	-0.0190752
Polr2k-NM_23127-mMC003874	0.414025	-0.207672	-0.613315
D10628-XM_139876-mMR031178	0.413893	0.251149	-0.374165
Ldb3-NM_11918-mMC009174	0.412711	0.62366	-1.2956
Hdac3-NM_10411-mMR028466	0.412616	0.124148	-0.609094
4930447I22Rik-No acc-mMC005170	0.412482	0.054174	-0.410146
Igh-V15-XM_487237-mMC009099	0.411217	-0.151076	-0.160154
A430110N23-NM_173008-mMC007437	0.411157	0.183737	0.61837
Lrp12-NM_172814-mMC019042	0.411038	0.155009	-0.104351
9330132O05Rik-NM_175259-mMC019203	0.41097	0.10243	-0.182019
Zfp64-NM_9564-mMR030216	0.410805	0.0743043	-0.0603684
Vsnl1-NM_12038-mMR028580	0.409378	-0.198237	-0.102683
Chrac1-NM_53068-mMC000878	0.408069	-0.252738	-0.273518
Phxr5-NM_8836-mMR029860	0.40782	-0.14077	0.81555
Zfp133-No acc-mMC007518	0.407689	-0.170879	0.350379
9530083O12Rik-No acc-mMC004729	0.407528	-0.302488	-0.699323
6430710M23Rik-No acc-mMC017650	0.407374	0.0413925	-0.286401
A230057G18Rik-XM_489103-mMC015425	0.40582	0.185324	0.316851
1810073N04Rik-NM_24249-mMC016109	0.405639	0.182568	-0.426013
2310045N01Rik-XM_486121-mMC025991	0.405542	-0.0713607	0.489418
1700047O18Rik-No acc-mMC001896	0.405114	0.0633904	-0.122716
Jam2-NM_23844-mMC016074	0.403507	0.206425	-0.806442
C8b-NM_133882-mMC003455	0.403366	-0.276547	0.436371
Prkacb-NM_11100-mMC002548	0.40307	-0.512347	-0.0546301
Clic1-NM_33444-mMC006119	0.402922	0.0274105	-0.192349
Chst5-NM_19950-mMC004600	0.402783	-0.316733	-0.522622
4921511F01Rik-NM_27583-mMC010895	0.402411	0.490594	-0.507219
Bai3-NM_175642-mMR026931	0.401741	0.129171	-0.838517
1110032D12Rik-NM_19770-mMR028701	0.401373	-0.262548	-1.42514
A830025F02Rik-No acc-mMC009856	0.400558	0.368474	-1.30306
Prrx2-NM_9116-mMC003788	0.400457	-0.516609	-0.939231
A930019D19Rik-No acc-mMC001696	0.400369	-0.207523	-1.10244
Olfr1018-NM_146586-mMC012826	0.399405	0.492654	-0.20793
Kl-NM_13823-mMC015040	0.399303	-0.0762306	-0.646175
2310047C17Rik-NM_175108-mMR029440	0.399099	-0.0273621	-0.836602
Syt12-NM_134164-mMC004618	0.398555	-0.0634283	-0.531447
Pcdhb8-NM_53133-mMC000963	0.397079	-0.202911	-0.342842
Pum1-NM_30722-mMC012333	0.396462	0.0367126	0.184917
Hand1-NM_8213-mMC007751	0.396373	-0.1561	0.00727345
Slc24a1-NM_144813-mMC016210	0.395672	-0.056952	-0.454821
E130306I01Rik-NM_145471-mMR029929	0.395404	-0.404669	-0.354526
1500041O16Rik-No acc-mMC013866	0.393939	0.0697089	0.361093
Rpl3-NM_13762-mMC019526	0.393789	-0.163856	-0.236116
Dars-NM_145507-mMC008579	0.393749	0.105797	-0.254168
8430428J23Rik-No acc-mMC003371	0.39324	0.528026	-0.264706
Ppic-NM_8908-mMC013968	0.39144	-0.0503964	-0.734574
Nr1d1-NM_145434-mMC003881	0.390944	0.0972215	0.44505
1700017N19Rik-XM_487140-mMC015206	0.390542	-0.473211	-0.975196
4833427F10Rik-No acc-mMC014688	0.39001	0.721716	0.145741
Rpn1-NM_133933-mMC009088	0.389934	-0.195131	-0.463587
Vamp1-NM_9496-mMR027148	0.389786	-0.280816	-0.188963
Gpr43-NM_146187-mMC017511	0.389649	0.196489	-0.679817
Mcm4-NM_8565-mMC016857	0.389169	0.188632	-0.193233
Rbm18-NM_26434-mMC013475	0.388923	-0.375145	0.333097
Phf8-NM_177201-mMC008860	0.388782	0.25563	-0.299223
Mobkl2c-NM_175308-mMC015402	0.388499	-0.21095	0.535018
Nfic-NM_8688-mMC008282	0.388356	-0.12417	0.259745
IGHV10S3-AF064446-mMO036163	0.385946	-0.208719	1.8006
A330104J06Rik-No acc-mMC018153	0.385557	-0.113897	-0.110665
1110017D15Rik-XM_355478-mMC015751	0.385419	0.0673974	0.235067
A130010C12Rik-No acc-mMC014780	0.385084	-0.182726	-0.462331
1700126G02Rik-No acc-mMC008467	0.38505	0.0300628	-0.082668
Orc6l-NM_19716-mMC005185	0.383822	-0.22464	0.429193
Pvrl1-NM_21424-mMC019290	0.383542	-0.126276	0.632631
2310004N24Rik-XM_181318-mMC019119	0.382834	0.433546	-0.0309164
C530024P05Rik-NM_177292-mMC008261	0.382273	-0.33637	0.1725
1110017C15Rik-NM_25391-mMR030213	0.381611	-0.913195	0.545281
H2-M10.1-NM_13544-mMC001740	0.38111	-0.12018	-1.15812
4930539N22Rik-No acc-mMC009243	0.381082	-0.166297	-0.966138
2810406C15Rik-NM_146171-mMC002652	0.381058	-0.247793	-0.703006
1810073G14Rik-NM_26342-mMC010778	0.380687	0.00234383	-0.231685
9130207N01-NM_177605-mMC014025	0.380527	0.0426011	-0.396573
8030479D07Rik-No acc-mMC008096	0.380426	0.0745867	-0.65949
2200002K05Rik-XM_134642-mMC010949	0.379794	-0.223139	0.390589
Ranbp9-NM_19930-mMC012319	0.379655	0.621662	-1.2799
Cep2-XM_358344-mMC011205	0.379511	-0.345917	0.371153
Map2k2-NM_23138-mMC005618	0.379354	-0.107113	-0.0749059
Rpl18-NM_9077-mMR030624	0.379308	0.0926157	0.314888
Hnrpul1-NM_144922-mMC002043	0.379114	-0.0524517	-0.135255
Rpl18a-XM_194410-mMC025449	0.379106	0.0574037	-0.0626504
Kirrel1-NM_130867-mMC009598	0.37902	-0.0106246	-0.89812
Def8-NM_54046-mMC014662	0.378974	0.000741413	-0.0455403
Vasp-NM_9499-mMR029525	0.378701	0.205108	-0.678359
Pcdhgb1-NM_33574-mMR029314	0.378613	-0.141284	0.365838
Rnd1-NM_172612-mMC005950	0.378578	0.254384	-0.399521
5830445D09Rik-No acc-mMC015030	0.378549	0.333461	-1.18251
Olfr771-NM_146547-mMC017129	0.378382	0.0310123	-0.162896
Fv1-NM_10244-mMC012107	0.378373	0.053202	-0.620702
1700055N04Rik-NM_28545-mMC009808	0.377983	-0.084834	-0.573431
Fxr2h-NM_11814-mMC014177	0.377515	0.137371	0.0323846
Ighmbp2-NM_9212-mMC013798	0.377314	-0.299125	-0.199353
Slc35d2-NM_1001321-mMC002422	0.376127	-0.252835	-0.229211
Agpat4-NM_26644-mMC008482	0.376	-0.0158853	-0.644702
Rnps1-NM_9070-mMC015577	0.375499	0.0990224	0.398353
A430042E23Rik-No acc-mMC008952	0.374638	-0.116356	-0.552993
Pcdhga5-NM_33588-mMR029506	0.374297	-0.423789	-0.271266
Lrig2-XM_194114-mMC019128	0.374258	-0.354293	0.125046
Dmrt3-NM_177360-mMC017804	0.374213	0.372731	0.0760619
Sca1-NM_9124-mMC017911	0.373532	0.381942	0.623731
4921517J08Rik-XM_128768-mMC014695	0.371873	-0.422184	-0.232236
Fbxw2-NM_13890-mMC014572	0.371765	-0.0936995	-0.847468
Psma5-NM_11967-mMR030285	0.371475	-0.228751	-0.36192
Il2rb-NM_8368-mMC014661	0.371259	-0.0113411	0.465686
2410022L05Rik-NM_25556-mMC016654	0.371015	0.234595	-0.700057
IGHE-X01857-mMO036386	0.370985	0.315004	-1.05287
2310043M15Rik-No acc-mMC013200	0.369258	0.0713962	-0.694506
AK053036-No acc-mMR001223	0.369123	0.0160682	0.10548
2310043L19Rik-No acc-mMC013276	0.368738	-0.00739442	0.369538
2410137M14Rik-NM_29747-mMC013328	0.368568	-0.14663	0.0783052
Ss18l1-NM_178750-mMC017391	0.368376	0.145018	-0.242699
4921539H07Rik-No acc-mMC010524	0.368318	-0.0902154	0.324175
2610510B01Rik-XM_354972-mMC003676	0.368289	-0.241436	-0.386561
Vamp8-NM_16794-mMC015654	0.367516	0.1721	-0.626264
2310066E14Rik-XM_486159-mMC011203	0.367173	0.00239474	-0.469309
Lhx2-NM_10710-mMC002376	0.366025	-0.140692	-0.269306
Hcngp-NM_20483-mMC012653	0.365368	0.0803823	-0.0605043
Cpa1-NM_25350-mMC011004	0.364928	0.0275506	-0.443926
1700029H14Rik-NM_25601-mMC003484	0.363531	0.442142	-0.8991
A530001N23Rik-No acc-mMC009344	0.362969	-0.111093	0.266091
C430049A07Rik-No acc-mMC008193	0.36292	-0.241262	0.194195
Olfr702-NM_146597-mMC006775	0.362764	-0.30484	0.269388
Pcdhga2-NM_33585-mMR027120	0.36264	-0.438772	-0.0999089
AI481316-No acc-mMC007122	0.362531	1.04422	-0.163572
Olfr659-NM_147050-mMC019129	0.361969	0.0634459	0.286796
Ak3l-NM_21299-mMC019347	0.361708	-0.0828908	0.29071
Rbbp4-NM_9030-mMC018333	0.361536	-0.103881	-0.168917
3010015K02Rik-No acc-mMC018908	0.361458	0.195292	0.258577
D430040D24Rik-No acc-mMC019412	0.361449	0.394056	-0.832277
3010023C09Rik-No acc-mMC012150	0.360718	-0.0277667	-0.505901
Col4a2-NM_9932-mMC008904	0.360486	-0.0100136	0.119391
3110005O21Rik-NM_29842-mMC017370	0.359771	0.442504	-0.338036
Edg8-NM_53190-mMC011213	0.359586	0.274178	-0.407808
1700021F13Rik-No acc-mMC009288	0.358629	-0.12835	0.314226
C130040D06Rik-XM_283202-mMC005086	0.35822	-0.0227839	-0.826104
6030432P03Rik-No acc-mMC024986	0.357833	0.174782	-0.120417
Pcdhgb8-NM_33580-mMR029394	0.357593	-0.306756	1.11117
Ntsr2-NM_8747-mMC002571	0.357041	-0.203538	-0.380453
Zfp307-NM_23685-mMC010433	0.357029	-0.414828	1.36901
4933432G23Rik-No acc-mMC017868	0.355625	-0.0227403	-0.821152
Agtrl1-NM_11784-mMC007134	0.355291	-0.238383	0.628479
Rassf5-NM_18750-mMC007200	0.354885	0.722904	-0.440545
Adck2-NM_178873-mMC016916	0.354772	-0.208297	0.282409
Serpina3c-NM_8458-mMC001019	0.3547	0.0477297	-1.35688
1700049L16Rik-NM_175390-mMC009108	0.354192	0.106521	-0.770568
Dnajc5-NM_16775-mMC015836	0.354007	0.0992337	0.276471
Gcc1-NM_28900-mMC017892	0.353905	0.394285	-1.13396
Olfr156-NM_19474-mMC014234	0.353565	-0.0788175	-0.791219
Lmtk2-XM_132499-mMC012260	0.353336	-0.0804402	-0.289909
Anapc11-NM_25389-mMC016733	0.352675	0.035502	0.611568
Gpr108-NM_30084-mMC005681	0.352316	0.216398	0.225668
Pcdhga8-NM_33591-mMR027996	0.351745	-0.472012	0.241464
Glyat-NM_145935-mMR027304	0.351724	0.0566592	-0.300838
Icam4-NM_23892-mMC001846	0.350786	0.510273	-1.23234
C030044C12Rik-No acc-mMC001549	0.350161	-0.160307	-1.06826
Xpo4-NM_20506-mMC022225	0.349857	0.483818	-0.0630294
Zfp180-NM_172483-mMR029398	0.349361	-0.572576	-0.637087
Hcn2-NM_8226-mMC002768	0.348492	-0.15341	-0.505163
Dapk2-NM_10019-mMC002611	0.348348	0.0865455	-0.858888
18S-rRNA_X00686-mMO035975	0.348122	-0.133737	-2.19241
Dap-NM_146057-mMC006994	0.347961	0.609063	-0.677987
Prss8-NM_133351-mMC010152	0.347844	0.0916626	-0.274351
Rock1-NM_9071-mMC008843	0.347658	-0.880177	0.0773761
Defb3-NM_13756-mMC014458	0.347548	0.406601	-0.591043
Bri3-NM_18772-mMC007846	0.346718	0.136373	-0.521728
Slc22a7-NM_144856-mMC005851	0.346697	-0.0225666	0.332442
Pafah2-NM_133880-mMC013855	0.34666	-0.0688475	-0.634788
9430098E02Rik-XM_134253-mMC004944	0.346108	0.00959124	-0.39332
2600016J21Rik-NM_133744-mMC012486	0.346074	-0.16823	0.0860391
C130040I11Rik-NM_9579-mMC003684	0.345898	0.590245	0.129201
Tec-NM_13689-mMC014853	0.345326	0.194907	-0.175521
Card4-NM_172729-mMC018283	0.345251	-0.16827	0.205795
1810073O08Rik-No acc-mMC016518	0.345236	-0.205043	-1.31222
C030015A19Rik-No acc-mMC003748	0.3452	0.167309	-0.744419
2200003E03Rik-NM_23186-mMC006361	0.344987	0.036594	0.122318
BC030183-NM_182783-mMC002961	0.34446	-0.0608206	0.0101338
Crlz1-NM_23054-mMC010033	0.34444	0.084144	-0.520125
AA517853-NM_153799-mMC003655	0.343767	-0.173844	-0.312113
Igsf10-XM_143254-mMC016052	0.343741	-0.200143	0.217934
Uts2r-NM_145440-mMC008014	0.343686	0.372446	-0.355381
C80879-NM_11931-mMR030699	0.343527	-0.171185	-0.372333
F830004D09Rik-No acc-mMC017865	0.343469	-0.344705	-1.02345
Sox7-NM_11446-mMC013952	0.343371	0.00352894	0.931821
Ubxd2-NM_26390-mMC014807	0.343084	-0.299681	-0.885775
Cyp2a4-NM_9997-mMR026800	0.342977	0.49704	-0.617524
Ccl17-NM_11332-mMC018219	0.342192	-0.0192226	0.364788
E230022H04Rik-NM_153515-mMC017375	0.341712	-0.0467239	-0.227512
2410026K10Rik-NM_25584-mMR027660	0.3415	-0.249277	0.413946
Srisnf2l-NM_30730-mMC018585	0.341265	-0.00932737	-0.196597
Rpn2-NM_19642-mMC017256	0.341258	-0.30308	0.594124
Chc1l-NM_134083-mMC015762	0.34111	0.209765	0.679159
Casp1-NM_9807-mMC003178	0.340858	-0.271242	-0.146093
Slc13a2-NM_22411-mMC014090	0.34067	-0.398136	0.426655
2810485I05Rik-NM_176836-mMC019245	0.340387	0.347255	-0.200475
Cmklr1-NM_8153-mMC010932	0.340366	0.571471	-0.269135
Llglh2-NM_145438-mMC011789	0.340344	-0.166841	0.165271
Slfn4-NM_11410-mMC017279	0.339878	-0.0431929	0.503754
Psmc5-NM_8950-mMC009711	0.339582	-0.34783	-0.240431
Olfr414-NM_146761-mMC013352	0.339184	0.0502483	-0.772733
Aqp4-NM_9700-mMC006379	0.33823	-0.115757	-0.5332
Gsdmdc1-NM_26960-mMC004998	0.337604	0.0117834	-0.915555
1700025D03Rik-NM_26469-mMC017997	0.337346	0.199431	0.0562288
B130005I07Rik-No acc-mMC011804	0.337248	0.232761	-0.189942
D330004O07Rik-No acc-mMC019811	0.33688	-0.387386	0.0470441
Gsbs-NM_11153-mMC017206	0.336398	-0.115143	0.0248338
Ms4a6d-NM_26835-mMC017690	0.336247	0.225104	-0.996724
2700033H19Rik-No acc-mMC013075	0.336122	0.0903163	0.704489
Ddx56-NM_26538-mMR026127	0.335015	0.0637741	-0.391294
9530090G24Rik-NM_145537-mMC011019	0.334876	-0.26964	0.268859
Adat1-NM_13925-mMC020537	0.334087	-0.371837	-0.544597
Tbx21-NM_19507-mMC012547	0.333914	0.118471	-0.464514
9330133O14Rik-NM_176948-mMC002056	0.333868	0.0646688	-0.529983
0610039N19Rik-NM_26159-mMC003638	0.333287	-0.484087	0.797985
5033421B08Rik-No acc-mMR031116	0.333263	-0.183274	-0.917763
Adpn-NM_54088-mMC018675	0.33316	-0.13752	0.0217143
Ctsz-NM_22325-mMC003875	0.331771	0.175441	-0.0758394
Afg3l1-NM_54070-mMR026858	0.330721	0.148502	-0.950569
Cnnm1-NM_31396-mMC011996	0.330522	-0.00643265	0.339229
Stard7-NM_139308-mMC006096	0.329995	-0.396693	-0.185406
Cnot10-NM_153585-mMC004465	0.329862	0.0466455	0.459087
Rnf152-NM_178779-mMC012451	0.328445	-0.162018	-0.949329
5430428G01Rik-NM_24178-mMR001173	0.328292	-0.0324823	-0.270919
5830435C13Rik-No acc-mMC026139	0.328151	-0.176383	-0.452224
4930528H21Rik-XM_149834-mMC008157	0.328006	-0.0431274	0.0100028
Pafah1b1-NM_13625-mMC023265	0.327969	0.0430993	-0.8028
Klf5-NM_9769-mMR028863	0.327953	-0.225791	-0.185971
Tyms-NM_21288-mMR029038	0.327852	-0.156516	0.754435
4933404K08Rik-No acc-mMC018308	0.325899	-0.58336	-0.2075
Xcl1-NM_8510-mMC007370	0.325847	-0.208102	0.218495
Flg-No acc-mMC006918	0.32571	0.0558289	-0.552742
4933421A08Rik-No acc-mMC015085	0.325248	0.364009	-0.109793
B230206N24Rik-NM_172487-mMC002375	0.323703	-0.166705	-0.44796
C130083B21Rik-No acc-mMC001016	0.323536	-0.117108	-0.860493
A730055L17Rik-NM_177219-mMC006796	0.322284	-0.188285	0.407772
Slc24a6-NM_133221-mMC019121	0.321995	-0.0879604	0.113777
Dsg4-NM_181564-mMC005936	0.321264	0.0719041	-0.832429
2810408A11Rik-NM_27419-mMC013006	0.321033	-0.0934131	-0.109468
AF155546-NM_21303-mMC012123	0.320439	-0.550967	0.739801
4930430O22Rik-No acc-mMC006751	0.320435	-0.210782	0.793577
Tdo2-NM_19911-mMC020310	0.320327	0.177873	0.852889
4930528P14Rik-No acc-mMC017937	0.320152	-0.00935085	-0.709443
4930568G15Rik-No acc-mMC009712	0.319421	-0.138079	-0.77509
1810008O21Rik-XM_485868-mMC009080	0.319389	-0.27647	-0.477512
AI506816-No acc-mMC016012	0.318966	0.0817932	0.442526
4930445E18Rik-No acc-mMC009089	0.318878	-0.0236233	-0.385418
1700091G21Rik-XM_203404-mMC019011	0.317632	0.223315	0.454912
Slc25a14-NM_11398-mMC014744	0.317128	0.109952	0.0315991
Ubap2-NM_26872-mMC015556	0.317023	-0.086358	0.540958
Olfr770-NM_146863-mMC014597	0.316992	0.0198769	-0.934112
Cxcl14-NM_19568-mMR030424	0.316836	-0.217961	0.41345
Dctn5-NM_21608-mMC007877	0.316658	-0.169417	0.0282647
D630021H01Rik-XM_489351-mMC023742	0.316171	-0.0205591	-0.0964804
Galm-NM_176963-mMC013829	0.315742	-0.14144	-0.499797
Ppp2cz-NM_27982-mMC001089	0.315444	-0.264613	-1.22031
2810430P21Rik-No acc-mMC017293	0.314898	-0.0352873	-0.110242
Sf3a1-NM_26175-mMC005388	0.314857	-0.179038	-0.274903
BC036563-NM_153159-mMC017802	0.314845	0.0747427	-0.315789
4921517L17Rik-XM_130609-mMC014117	0.314747	0.393623	-1.11278
A630006J10Rik-No acc-mMC005759	0.314742	-0.400516	-0.555092
Alg2-NM_19998-mMC018214	0.314514	-0.0993648	-0.261271
Hist1h1c-NM_15786-mMC010699	0.314364	-0.0418745	0.346778
Kcna2-NM_8417-mMC016383	0.314305	0.0495224	-0.311358
Gdi3-NM_8112-mMC023561	0.314204	-0.138905	1.11986
Trpm2-NM_138301-mMC014618	0.314014	-0.205248	-1.10306
1700036G14Rik-No acc-mMC014318	0.313832	-0.273715	0.103932
B230217J21Rik-No acc-mMC001973	0.31383	-0.386767	-0.394942
B4galt7-NM_146045-mMC009623	0.313678	0.120678	-0.17453
Ankrd27-NM_145633-mMC004974	0.313184	-0.466785	-0.615787
Gusb-NM_10368-mMC016767	0.313082	0.254028	-1.08551
E130310K16Rik-NM_172987-mMC016458	0.312942	0.514148	0.542494
Dnajb3-NM_8299-mMC015477	0.312659	0.103099	-0.589618
Hs6st3-NM_15820-mMC004983	0.312393	-0.0361218	0.068032
4930455F23Rik-NM_29115-mMC009689	0.310963	0.0330585	0.583023
Mcfd2-NM_139295-mMC015339	0.310959	0.705863	-0.849762
5330414O08Rik-NM_183270-mMC006809	0.310886	-0.323352	0.192775
Tnfsf14-NM_19418-mMC014741	0.310854	0.258659	-0.0695965
C130073E24Rik-No acc-mMC008297	0.310356	0.0049615	-0.482551
C130040J23Rik-No acc-mMC014726	0.309384	-0.24294	-0.120014
Prodh2-NM_19546-mMC006790	0.309355	0.260851	-0.632013
5330421C15Rik-No acc-mMC002052	0.309135	-0.332947	-0.532744
5830456J23Rik-No acc-mMC006191	0.308689	0.115287	0.787494
Sec8l1-NM_9148-mMC011873	0.308635	-0.235878	0.421558
2010107G23Rik-NM_27251-mMC014314	0.308617	0.137277	1.54033
P2ry1-NM_8772-mMC015490	0.308381	-0.274288	-0.0964626
Gadd45a-NM_7836-mMC007222	0.308228	0.112267	-0.945978
4930518I17Rik-No acc-mMC013784	0.308176	0.276251	-0.58165
1500001M20Rik-XM_132806-mMC017075	0.308051	0.263161	0.390415
2610024B07Rik-No acc-mMC013884	0.307822	-0.351948	-0.259053
Olfr411-NM_146709-mMC018573	0.307705	-0.279899	-1.00154
1110014O20Rik-No acc-mMC007327	0.307686	-0.0608422	-0.103384
Txndc4-NM_29572-mMC007342	0.307532	0.112519	0.355663
Card15-NM_145857-mMR030202	0.307489	-0.285003	-0.347986
Pcdhgb7-NM_33579-mMR030020	0.307481	-0.288202	-0.0982537
4930563F15Rik-No acc-mMC017730	0.30742	-0.285941	0.819251
Scnn1b-NM_11325-mMC008101	0.307222	-0.325404	0.199192
Odf1-NM_8757-mMC011983	0.307107	0.28476	-1.17077
Preb-NM_16703-mMC016821	0.307016	0.0742455	0.134097
Slc16a8-NM_20516-mMC006718	0.306835	-0.269278	-1.02251
B130050I23Rik-NM_153536-mMC002778	0.306834	-0.0018545	0.839342
Terf2-NM_9353-mMC015594	0.306324	0.106243	0.380508
Dpp10-NM_199021-mMC017277	0.306212	-0.218764	0.246893
Ddx24-NM_20494-mMC009832	0.304767	0.00262135	-0.861381
3300005D01Rik-XM_196166-mMC007114	0.303751	-0.232517	-0.163232
1190005N23Rik-No acc-mMC025933	0.303678	-0.0332322	-0.552246
Mcpt7-NM_31187-mMC002365	0.303339	-0.291181	-0.023713
Mfge8-NM_8594-mMC002993	0.302455	-0.378348	1.21254
AK122525-NM_199028-mMC003193	0.301687	-0.272613	-0.398789
Adra2a-NM_7417-mMC017812	0.301538	0.10224	-0.515062
8030493G06Rik-No acc-mMC005981	0.301506	-0.0479008	0.148748
4921525D07Rik-No acc-mMC002013	0.301295	0.437014	-0.888041
Ucp1-NM_9463-mMC016083	0.301116	0.146559	-0.169738
4833426J09Rik-No acc-mMC010971	0.300948	-0.201904	0.00625449
Tnip1-NM_21327-mMC019122	0.300927	0.408026	-0.285932
6330419J24Rik-NM_183030-mMC003125	0.299784	-0.456336	0.236533
BC021790-NM_144824-mMC011344	0.299674	0.246625	-1.19035
Cox15-NM_144874-mMR027270	0.299574	-0.146316	-0.396405
4930556P03Rik-NM_29236-mMC015976	0.299539	0.0550228	-0.711933
D7Rp2e-NM_33080-mMC014370	0.298736	0.974412	-0.559903
Cklfsf3-NM_24217-mMC007904	0.298232	-0.113152	-0.127106
C130020C13Rik-No acc-mMC015581	0.297931	0.0984333	0.202319
4833416J08Rik-No acc-mMC002326	0.297896	0.087117	-1.02451
Bucs1-NM_54094-mMC005729	0.297465	0.170436	0.439271
Gas2-NM_8087-mMC017313	0.297443	-0.265997	0.0932919
IGHV5S18-AF290972-mMO036190	0.297237	0.339426	-0.247027
1700013F07Rik-XM_131080-mMC002629	0.297032	-0.179359	-0.138115
1700034B16Rik-No acc-mMC017173	0.296839	0.185181	-2.36782
Cobll1-NM_177025-mMR027963	0.296352	-0.018736	-0.273748
Slc8a1-NM_11406-mMC019281	0.295903	-0.1962	0.393019
Sf3b1-NM_31179-mMC006991	0.295733	-0.370091	-0.535261
1700100L14Rik-No acc-mMC010029	0.295704	0.131606	0.518666
Iqce-NM_28833-mMC005913	0.295018	0.270734	0.068221
2610203E10Rik-NM_183220-mMC015009	0.294967	0.346352	-0.338782
A630020A06-No acc-mMC016226	0.294395	-0.153005	-0.984917
Olfr836-NM_146564-mMC016610	0.294076	-0.080774	-0.105176
1700052H01Rik-No acc-mMC003998	0.292123	-0.242186	-0.129027
Ela3b-NM_26419-mMR029549	0.29192	0.0924665	-0.925138
5730461K03Rik-NM_27475-mMC008588	0.290059	0.342825	-0.614191
Gbl-NM_19988-mMC014400	0.28936	0.335637	-0.418857
Notch3-NM_8716-mMC008201	0.289215	-0.256692	0.0508549
Tnip2-NM_139064-mMC008992	0.289037	-0.292785	0.0684384
Ptpn9-NM_19651-mMC008656	0.288712	-0.0141553	-0.576361
Rgs14-NM_16758-mMC018103	0.288515	0.00735835	-0.457173
Ggta1-NM_10283-mMC009228	0.287913	0.0247357	-0.793683
Ppie-NM_19489-mMC017503	0.28788	-0.133802	0.328135
A430096B05Rik-XM_488307-mMC010734	0.287876	-0.0435745	-0.7653
Cklfsf6-NM_26036-mMC012703	0.287486	-0.0233976	-0.796282
1700061J05Rik-XM_181371-mMC007768	0.286687	0.0757269	-1.13317
3110043O21Rik-XM_283954-mMC004200	0.285841	-0.0225901	-0.838247
Tram2-NM_133252-mMC018252	0.285498	0.0649519	-0.807191
Lrp4-NM_172668-mMC013144	0.283924	0.0447247	-0.626997
2310038E17Rik-XM_146486-mMC017496	0.283219	0.0580024	-0.213061
Pzp-NM_7376-mMC003083	0.28313	-0.725906	1.79245
Eef2-NM_7907-mMR029029	0.283044	-0.0800639	-0.374177
Fxyd6-NM_22004-mMC014871	0.282628	0.312258	-0.97214
Tbce-NM_178337-mMC002621	0.281721	-0.588793	-0.0309044
Bach2-NM_7521-mMC019513	0.281308	-0.194713	-0.477558
Gja3-NM_16975-mMC018633	0.281181	0.15605	-0.235484
9130427A09Rik-NM_26240-mMC019056	0.280882	-0.192011	0.591244
E130201N16Rik-NM_30024-mMC010861	0.280842	-0.155676	0.337031
4933409L14Rik-No acc-mMC009068	0.280741	0.354521	-0.693346
E130307J07Rik-NM_175483-mMC003379	0.280585	-0.0206688	0.0709659
AW210570-NM_25296-mMC007709	0.280565	0.0492007	-0.224052
4930478P22Rik-No acc-mMC013084	0.280433	-0.0487664	-0.344335
C330006P03Rik-No acc-mMC015629	0.27951	0.0482186	-0.227353
2310069G16Rik-No acc-mMC019397	0.279238	-0.138516	0.212192
8430438L13Rik-NM_172756-mMC016221	0.2792	0.412221	0.0881195
D430040L24Rik-No acc-mMC011419	0.279079	-0.160276	-0.515669
5430413K10Rik-NM_175167-mMC004261	0.278628	0.0136002	0.101582
Prdm1-NM_7548-mMC016788	0.277912	0.310078	0.502602
3526401B18Rik-No acc-mMC007077	0.277847	-0.10439	-0.457082
Acsl4-NM_19477-mMC014723	0.276787	-0.222117	1.60893
A230106M15Rik-NM_175474-mMC008283	0.275594	0.0730194	-0.558671
Zfp294-XM_128374-mMC015597	0.275535	0.296286	-0.160524
B230219N05Rik-No acc-mMR029546	0.27519	-0.156708	-0.455056
Rbm10-NM_145627-mMC019501	0.274324	0.521667	-0.233569
Map2k4-NM_9157-mMC017623	0.274245	-0.0169408	-0.034969
Chga-NM_7693-mMC002941	0.273573	0.121812	-0.935768
5630401D06Rik-No acc-mMC009454	0.27333	0.145041	-0.236805
BC059842-NM_198170-mMC009435	0.27332	0.0377287	-0.135712
1700016L15Rik-No acc-mMC018126	0.273309	0.076543	-0.774727
9130015G15Rik-No acc-mMC002359	0.272724	-0.0208849	-0.856661
4930401B11Rik-No acc-mMC018367	0.272454	0.392914	-1.03133
Hey1-NM_10423-mMC016567	0.272417	1.11606	-1.64784
Zc3hdc5-NM_172569-mMC000939	0.27155	-0.0753204	-0.81388
Nfil3-NM_17373-mMC010227	0.270308	-0.175355	-0.000220528
9230118O15Rik-NM_183127-mMC010338	0.268918	-0.22853	1.25726
4930552P06Rik-No acc-mMC014438	0.268467	0.258297	-0.795792
Cklf-NM_29295-mMR031119	0.268402	-0.130656	-0.829912
5730412P04Rik-No acc-mMC007005	0.267337	-0.153455	0.0330826
Mrpl34-NM_53162-mMC007479	0.267288	-0.12501	0.0583062
Pyp-NM_26438-mMC004699	0.266476	-0.174935	0.48447
D030011O10Rik-NM_177192-mMC019486	0.266396	0.0149106	0.407069
Ppp1r14d-NM_28104-mMC010822	0.266392	0.401208	-0.288426
Adamts20-NM_177431-mMC008159	0.265902	-0.177711	-0.192293
Il1rn-NM_31167-mMC015067	0.265684	0.0669523	0.379159
Zdhhc9-NM_172465-mMC000945	0.265579	-0.15126	-0.167219
Cxcl16-NM_23158-mMR001166	0.265479	0.0243851	-0.63174
[truncated: 4,844 more rows]

## Sheet: 24Hourdata
	Block	Column	Row	Gene Name	ID	cip1	cip2	cip3	cip4	cpa1	cpa2	cpa3	cpa4	cip_av	cpa_av	fit2.F.p.value
[truncated: 1,597 more rows]
