# Supplementary material for: Genes involved in the induction of liver growth by peroxisome proliferators
Source: Royal Society of Chemistry journal article supplement (doi:10.1039/c3tx50110h), 2014-01-01
Supplement: c3tx50110h2.xlsx [file c3tx50110h2.xlsx]

## Sheet: diffExp_res_signif
chromosome	strand	genomic start position	genomic end position	exon counts	Gene Name	Accession Number	baseMean	baseMeanA	baseMeanB	foldChange	log2FoldChange	pval	padj
chr4	+	209570472	209585792	15	Slc6a1	NM_024371	3.68503	7.09414	0.275922	0.0388944	-4.68429	0.00115857	0.021227
chr4	+	61588009	61600050	10	Akr1b7	NM_053781	4.45858	8.22508	0.692074	0.0841419	-3.57103	0.00492574	0.0607426
chr8	+	115411026	115415974	3	Cish	NM_031804	308.799	569.061	48.537	0.0852932	-3.55142	8.50503e-07	5.40497e-05
chr19	-	11283092	11283867	3	Mt2A	NM_001137564	43.0563	76.6123	9.50034	0.124005	-3.01153	1.26079e-06	7.6465e-05
chr1	+	263583987	263589575	4	Hhex	NM_024385	567.876	1005.64	130.114	0.129384	-2.95026	4.20637e-06	0.00021243
chr9	+	79888641	79915193	4	Igfbp2	NM_013122	173.304	304.478	42.1311	0.138372	-2.85338	1.1367e-20	6.86257e-18
chr19	-	11277132	11278149	3	Mt1a	NM_138826	66.5574	116.275	16.84	0.144829	-2.78757	0.000419429	0.00980784
chr12	+	4375802	4379100	7	RGD1565374	NM_001134602	3.91962	6.82488	1.01436	0.148627	-2.75023	0.00252812	0.0373926
chr14	+	81083055	81088123	4	Igfbp1	NM_013144	1588.29	2747.17	429.41	0.15631	-2.67752	0.00707343	0.0797532
chr18	+	27369517	27371716	2	Egr1	NM_012551	196.636	332.723	60.5495	0.181982	-2.45814	0.000169613	0.00480343
chr1	+	102766761	102771674	4	Dbp	NM_012543	105.726	176.893	34.5585	0.195364	-2.35576	0.000801676	0.0161331
chr19	-	37068594	37070379	1	Junb	NM_021836	352.362	573.284	131.44	0.229276	-2.12484	0.000891339	0.0176172
chr11	+	64474113	64501029	6	Cd200	NM_031518	10.3702	16.7223	4.01813	0.240286	-2.05718	0.00108585	0.0203306
chr7	+	120573572	120584925	3	Maff	NM_001130573	16.2905	26.1123	6.46876	0.247728	-2.01317	0.00158812	0.026566
chr1	+	196227764	196266992	14	Acsm2a	NM_144748	247.513	392.882	102.144	0.259987	-1.94349	6.71826e-15	1.89855e-12
chr6	+	36457850	36464874	8	Slc30a3	NM_001013243	40.6653	64.1029	17.2277	0.26875	-1.89566	1.25853e-05	0.000566635
chr7	-	71135885	71142278	7	Nab2	NM_001134874	22.365	35.0401	9.68993	0.276538	-1.85445	5.33796e-05	0.00188561
chr4	+	10265818	10414946	18	Ccdc146	NM_001025044	15.0584	23.5548	6.56214	0.278591	-1.84378	0.00529726	0.0636726
chr6	+	7897004	7916593	13	Abcg8	NM_130414	57.9342	90.4794	25.3889	0.280605	-1.83339	7.97679e-09	9.45962e-07
chr3	+	49922718	49961766	7	Upp2	NM_001106481	489.364	764.232	214.496	0.280668	-1.83306	0.000316881	0.00788167
chr15	-	53218721	53238664	13	Adamdec1	NM_001106046	32.2626	50.0772	14.448	0.288516	-1.79328	6.98602e-06	0.000335182
chr10	+	55430183	55439080	22	Per1	NM_001034125	157.199	239.284	75.1148	0.313914	-1.67156	1.10313e-05	0.000503499
chr6	-	7871268	7896799	13	Abcg5	NM_053754	141.234	214.667	67.8004	0.31584	-1.66273	4.11509e-05	0.0015353
chr3	+	99168110	99305188	5	Slc1a2	NM_001035233	23.2026	35.1616	11.2436	0.319768	-1.6449	0.000821159	0.0164753
chr2	+	113547702	113552304	4	Fabp4	NM_053365	14.7146	22.2708	7.15832	0.321422	-1.63746	0.00766044	0.0845066
chr2	-	84360849	84506427	10	Prlr	NM_012630	42.5107	63.3389	21.6826	0.342327	-1.54655	0.000891092	0.0176172
chr2	-	14553601	14553661	1	LOC252890	NR_002705	9.90982	14.7538	5.06581	0.343356	-1.54222	0.00524613	0.0634023
chr5	+	141964116	141992634	10	Slc2a1	NM_138827	53.9673	80.0835	27.8511	0.347776	-1.52377	1.59253e-10	2.67746e-08
chr5	-	161263764	161274897	4	Nbl1	NM_031609	14.9252	22.1087	7.74178	0.350169	-1.51388	0.00529136	0.0636592
chr11	-	67166382	67203665	11	Pla1a	NM_138882	39.714	58.7856	20.6423	0.351146	-1.50986	0.000354081	0.00867694
chr7	-	36558028	36560623	2	Socs2	NM_058208	280.791	414.644	146.937	0.354368	-1.49668	0.000229858	0.00623056
chr5	+	82606810	82690342	16	Rgs3	NM_019340	515.57	749.538	281.602	0.375701	-1.41234	4.68716e-06	0.000232294
chr1	+	76071584	76073672	2	Nat14	NM_001108466	11.0103	15.9892	6.03145	0.37722	-1.40652	0.00519979	0.0632451
chr4	-	22276389	22360509	28	Abcb1a	NM_133401	58.5516	84.977	32.1262	0.378058	-1.40332	0.00351851	0.0473964
chr13	-	94169876	94192679	3	Pcp4l1	NM_001126093	36.9675	53.6355	20.2994	0.378469	-1.40175	0.00350797	0.0473504
chr8	+	81384923	81412265	2	Onecut1	NM_022671	343.943	492.367	195.519	0.3971	-1.33242	1.97049e-23	1.37748e-20
chr2	-	74606721	74622982	3	Pla2g12a	NM_001108565	212.983	303.92	122.046	0.401572	-1.31627	7.78035e-05	0.00258346
chr6	+	6384828	6394146	7	Pkdcc	NM_001108007	1047.7	1493.28	602.12	0.403219	-1.31036	4.03496e-17	1.57625e-14
chr20	-	5535615	5536820	2	Ier3	NM_212505	163.624	232.887	94.3606	0.405178	-1.30337	1.49661e-07	1.19747e-05
chr1	-	77823864	78012472	6	Sult2a6	NM_012695	76.1113	107.951	44.2712	0.410102	-1.28594	3.27339e-10	5.23821e-08
chr5	+	102512704	102558784	2	Lurap1l	NM_001025022	227.604	320.332	134.877	0.421053	-1.24793	3.3495e-06	0.000172434
chr10	+	55973680	55975433	6	Sat2	NM_001108278	97.173	136.548	57.7985	0.423285	-1.2403	1.13238e-10	2.11836e-08
chr14	+	63195103	63286096	13	Ppargc1a	NM_031347	59.5357	83.3962	35.6752	0.42778	-1.22506	2.82289e-08	2.7773e-06
chr10	-	13410717	13435965	17	Ccnf	NM_001100474	35.2092	49.1447	21.2737	0.432878	-1.20797	0.000682036	0.0142658
chr20	+	6564671	6566027	5	Tnxa-ps1	NR_024118	15.2468	21.1918	9.30192	0.43894	-1.1879	0.00634183	0.073373
chr2	+	219274815	219301535	10	Fmo5	NM_144739	1249.12	1734.95	763.294	0.439952	-1.18458	0.00186029	0.0296264
chr12	-	25837102	25838663	4	Hspb1	NM_031970	84.9462	117.748	52.1445	0.442849	-1.17511	9.73741e-05	0.00311644
chr1	-	77849695	77903846	6	Sult2a1	NM_131903	1204.52	1665.22	743.822	0.446681	-1.16268	4.24024e-05	0.00157756
chr18	-	6791049	7035778	4	Chst9	NM_001170470	20.0723	27.7262	12.4183	0.447893	-1.15878	0.00102857	0.0196568
chr10	-	16586529	16644316	9	Crebrf	NM_001277157	295.121	406.526	183.716	0.451918	-1.14587	3.20117e-09	4.33857e-07
chr17	+	71714422	71724533	10	Net1	NM_001039023	999.921	1371.92	627.918	0.457691	-1.12755	5.66382e-06	0.00027759
chr1	+	259812247	259846107	9	Fas	NM_139194	38.6165	52.8833	24.3497	0.460441	-1.11891	0.000513734	0.0115651
chr7	+	123019281	123034386	4	Tef	NM_019194	292.583	399.118	186.049	0.46615	-1.10113	3.65604e-09	4.76074e-07
chr8	-	51578464	51739786	7	Zbtb16	NM_001013181	483.918	659.678	308.159	0.467136	-1.09808	5.45096e-09	6.72627e-07
chr6	-	64589073	64624078	12	Ahr	NM_013149	335.885	457.632	214.138	0.467927	-1.09565	2.20202e-11	4.4314e-09
chrX	-	14932358	15003055	10	Srpx	NM_022524	20.1645	27.446	12.8829	0.46939	-1.09114	0.00313776	0.0436852
chr1	+	35319894	35325724	5	Irx1	NM_001107331	48.8944	66.5484	31.2404	0.469439	-1.09099	0.00200491	0.0315512
chr13	-	106384790	106527113	10	Disp1	NM_001105983	15.7285	21.4075	10.0496	0.469442	-1.09098	0.00465385	0.0582587
chr20	+	10364284	10368419	6	Pim1	NM_017034	50.8804	69.0726	32.6881	0.473242	-1.07935	1.88373e-06	0.000106903
chr1	+	196182755	196205723	14	Acsm5	NM_001014162	1125.31	1525.15	725.481	0.475679	-1.07194	9.85545e-07	6.14555e-05
chr11	-	50298774	50304113	6	Rpl24	NM_022515	26.5497	35.9218	17.1775	0.478192	-1.06434	0.00104525	0.0198329
chr18	+	45166500	45372242	2	Prr16	NM_001108432	237.195	320.507	153.883	0.480125	-1.05852	5.60925e-13	1.30705e-10
chr1	+	197723278	197765825	17	Eef2k	NM_012947	64.5459	87.1706	41.9211	0.480909	-1.05616	2.65387e-06	0.000141561
chr1	-	231268687	231332683	10	UST4r	NM_134379	228.151	306.595	149.707	0.488288	-1.0342	0.000413866	0.00972916
chr19	-	36750510	36752033	1	Ier2	NM_001009541	396.593	532.598	260.588	0.489278	-1.03127	3.59925e-15	1.12148e-12
chr3	+	60870421	60883765	2	B3galt1	NM_001108954	380.526	510.751	250.3	0.490062	-1.02896	3.6641e-15	1.12148e-12
chr9	+	94440841	94444058	3	Neu2	NM_017130	19.1748	25.7114	12.6383	0.491543	-1.02461	0.0045832	0.0574826
chr1	+	79520748	79521829	1	Bbc3	NM_173837	72.4821	97.1595	47.8046	0.492022	-1.02321	1.5033e-06	8.83489e-05
chr16	-	20299676	20318027	16	Pde4c	NM_001276765	18.9966	25.4268	12.5665	0.494224	-1.01676	0.00834437	0.0896682
chr16	-	7408995	7472907	9	Sh3bp5	NM_054011	388.296	519.156	257.436	0.495874	-1.01195	3.10059e-15	1.00444e-12
chr1	+	86595417	86597898	2	Zfp36	NM_133290	634.874	847.972	421.776	0.497394	-1.00754	1.20788e-12	2.67385e-10
chr16	+	2925677	2994155	10	Arhgef3	NM_001106061	77.9306	103.946	51.9152	0.499445	-1.0016	0.00104444	0.0198329
chr12	-	23849258	23850731	1	Cldn3	NM_031700	683.916	911.671	456.162	0.500358	-0.998967	3.55424e-05	0.00137631
chr7	-	131968474	132017044	10	Abcd2	NM_033352	21.2027	28.2354	14.1699	0.50185	-0.994673	0.00191433	0.0303414
chr17	+	10665528	10671747	4	Lect2	NM_001108405	1205.95	1604.71	807.185	0.503009	-0.991345	7.07168e-08	6.21384e-06
chr8	-	62228270	62235203	7	Cyp1a2	NM_012541	5827.43	7728.25	3926.61	0.508086	-0.976856	2.55002e-07	1.88163e-05
chr19	+	62818766	62834031	8	Osgin1	NM_138504	1399.72	1852.71	946.725	0.510994	-0.96862	0.00254092	0.0374984
chr4	+	66867506	66868544	1	Chmp4bl1	NM_001276456	43.3726	57.2768	29.4684	0.51449	-0.958785	0.000231943	0.00624882
chr3	-	160793300	160819979	15	Lbp	NM_017208	1803.86	2380.4	1227.32	0.515594	-0.955693	1.93367e-12	4.14243e-10
chr15	-	93662944	93665780	2	Spry2	NM_001012046	22.1	29.1587	15.0413	0.515843	-0.954995	0.0079003	0.0860802
chr20	-	4135088	4140578	4	Rnf39	NM_134374	183.273	241.641	124.904	0.516899	-0.952045	1.50562e-09	2.19754e-07
chr1	+	220406341	220416726	9	Cyp2e1	NM_031543	26738.7	35122.2	18355.2	0.522608	-0.936199	0.000376465	0.00905836
chr10	-	94714851	94724959	8	Polg2	NM_001107060	294.749	386.552	202.945	0.525015	-0.92957	3.31441e-09	4.44666e-07
chr12	-	12819937	13740743	16	Cyp3a2	NM_153312	2801.52	3674.09	1928.95	0.525016	-0.929567	0.00896888	0.0940211
chr7	+	3303448	3305798	7	Cd63	NM_017125	278.123	364.015	192.231	0.528085	-0.921158	2.85872e-05	0.00113342
chr1	+	16961079	17160996	28	Map3k5	NM_001277694	184.859	241.79	127.928	0.529088	-0.91842	0.00305585	0.0427691
chr2	+	199362290	199537365	6	Pdgfc	NM_031317	34.4175	44.9882	23.8467	0.530067	-0.915754	0.00699185	0.0789675
chr10	+	9811578	9820512	6	Nmral1	NM_001191588	47.7716	62.4352	33.1081	0.53028	-0.915174	0.000168209	0.00477381
chr8	+	116921131	116944750	7	Ip6k2	NM_021660	249.608	326.049	173.167	0.531108	-0.912923	7.94627e-05	0.00263198
chr14	+	22625221	22636971	6	Ugt2b1	NM_173295	747.911	973.973	521.849	0.535794	-0.900249	7.52785e-05	0.00251851
chr9	-	82438464	82443159	4	Chpf	NM_001005906	74.0022	96.3046	51.6999	0.536837	-0.897443	0.000627913	0.0134083
chr1	+	255382759	255397661	7	Il33	NM_001014166	605.322	785.214	425.431	0.541803	-0.88416	1.89247e-06	0.000106903
chr18	-	37834362	37842734	4	Spink1	NM_152936	624.32	807.228	441.411	0.546823	-0.870855	1.32497e-06	7.96301e-05
chr4	-	198194464	198429508	11	Pdzrn3	NM_001271251	55.3765	71.5096	39.2433	0.548784	-0.86569	0.00373822	0.0499006
chr8	+	49185194	49187679	4	Apoa5	NM_080576	57.095	73.7022	40.4877	0.549343	-0.864222	0.000280858	0.00721336
chr5	+	122797452	123142158	9	Ror1	NM_001108671	38.1057	49.104	27.1074	0.552042	-0.85715	0.000863757	0.0171486
chr4	-	154006119	154102125	18	Fam13a	NM_001100862	158.049	203.659	112.44	0.552098	-0.857003	0.00287434	0.0410558
chr10	-	85510908	85514870	5	Rpl23	NM_001007599	432.186	556.748	307.624	0.552537	-0.855857	1.16575e-10	2.12547e-08
chr1	-	228361452	228365776	10	Tm7sf2	NM_001013071	1038.56	1335.58	741.533	0.555213	-0.848887	0.00288366	0.0411382
chr17	-	69624950	69633946	4	Klf6	NM_031642	273.808	351.939	195.676	0.555992	-0.846864	3.86938e-05	0.00146003
chr5	+	171529355	171542775	5	Errfi1	NM_001014071	10352.1	13296.9	7407.43	0.557081	-0.84404	0.00245216	0.0367602
chr3	+	1456035	1461452	4	Il1rn	NM_022194	431.21	553.547	308.873	0.557988	-0.841693	0.000989938	0.0190832
chr1	+	75912935	75915497	5	Rpl28	NM_022697	81.3423	104.33	58.3546	0.559327	-0.838236	1.98165e-05	0.000825086
chr8	+	47022615	47046715	13	Usp2	NM_053774	48.858	62.6194	35.0966	0.560474	-0.83528	0.00108951	0.0203306
chr10	+	56355169	56364388	15	Dvl2	NM_001172056	37.1875	47.6269	26.7481	0.561619	-0.832337	0.00247414	0.0369646
chr5	+	160625615	160627396	2	Camk2n1	NM_173337	54.2139	69.4194	39.0085	0.561925	-0.83155	0.00811084	0.0878697
chr18	-	39737212	39789086	10	Trim36	NM_001106147	136.582	174.633	98.5302	0.564211	-0.825693	2.1657e-07	1.64371e-05
chr1	-	170637727	170643027	7	Rps3	NM_001009239	69.5214	88.838	50.2047	0.565127	-0.823353	0.000145312	0.00431774
chr9	-	94290728	94323295	13	Ngef	NM_001136241	261.398	333.798	188.998	0.566205	-0.820605	5.86277e-09	7.07902e-07
chr11	+	91174845	91177088	3	Sdf2l1	NM_001109433	231.986	295.906	168.065	0.567969	-0.816116	4.08053e-05	0.00152669
chr4	+	27078789	27097242	10	Cyp51	NM_012941	1247.28	1590.87	903.697	0.568051	-0.815907	3.81743e-05	0.00144453
chr4	-	183021766	183042167	6	Mxd1	NM_001100749	75.6429	96.4167	54.869	0.569082	-0.813293	5.55671e-05	0.00193712
chr13	-	97359448	97453188	2	Grem2	NM_001105974	43.7085	55.6953	31.7218	0.569559	-0.812082	0.00125974	0.0223688
chr14	+	22455324	22493180	6	Ugt2b15	NM_001004271	3535.72	4497.31	2574.12	0.57237	-0.804981	1.14603e-12	2.57992e-10
chr1	+	196449104	196475596	15	Acsm3	NM_033231	349.246	444.058	254.433	0.572973	-0.803462	0.000162613	0.00468434
chr3	-	168266584	168329647	13	Slc13a3	NM_022866	601.286	763.304	439.267	0.575481	-0.797159	0.000164552	0.00469632
chr17	-	1861402	1867561	8	Ctsl1	NM_013156	6191.49	7851.43	4531.54	0.577161	-0.792954	0.000495188	0.011276
chr20	+	48347550	48437686	8	Sesn1	NM_001106396	212.964	270.019	155.909	0.577401	-0.792356	2.29625e-07	1.73289e-05
chr9	+	118970172	119045052	20	Lpin2	NM_001108236	662.713	838.988	486.438	0.579791	-0.786394	0.00211276	0.0327232
chr12	+	26145931	26149929	3	Ccl24	NM_001013045	47.4359	60.0532	34.8186	0.579796	-0.786384	0.00131083	0.0229993
chr1	-	220730714	220731824	2	Ifitm3	NM_001136124	505.384	638.948	371.82	0.581925	-0.781094	0.0020355	0.0318816
chr1	+	88407560	88411822	4	Ppp1r14a	NM_130403	54.0446	68.3233	39.766	0.582026	-0.780843	0.000668655	0.014046
chr1	-	229229798	229233423	7	Vegfb	NM_053549	70.8193	89.5206	52.118	0.58219	-0.780438	0.000413201	0.00972916
chr13	-	55590138	55602878	5	Golt1a	NM_001109070	107.67	136.041	79.2986	0.582902	-0.778675	0.00426958	0.0547908
chr3	+	52711811	52715433	3	Tsc22d3	NM_031345	565.619	714.607	416.631	0.58302	-0.778382	5.47356e-08	4.97944e-06
chr8	+	71583272	71610446	8	Dapk2	NM_001013109	78.9939	99.7911	58.1967	0.583185	-0.777974	0.000134837	0.00407024
chr5	-	69174929	69179186	4	Acnat2	NM_001014063	374.51	472.575	276.444	0.584975	-0.773553	2.25431e-08	2.30321e-06
chr10	+	108876794	108878946	3	LOC690871	NM_001195482	91.7845	115.807	67.7619	0.585126	-0.77318	0.000507591	0.0114657
chr2	+	108114934	108121192	4	RGD1565641	NM_001109179	57.2817	72.2715	42.2919	0.585181	-0.773045	0.000593831	0.0129938
chr5	-	149142701	149145235	2	Gja4	NM_021654	28.418	35.8518	20.9843	0.585307	-0.772734	0.00378598	0.0503947
chr11	+	36054443	36064297	4	Smim11	NM_001131000	38.7393	48.8124	28.6662	0.587273	-0.767897	0.00505058	0.0618265
chr3	+	148793486	148797682	3	Foxa2	NM_012743	294.563	370.76	218.367	0.588972	-0.76373	0.00265285	0.0387626
chr10	-	101923475	101947679	2	Cdc42ep4	NM_001107063	440.762	554.672	326.852	0.58927	-0.762998	4.04141e-06	0.000205663
chr12	-	52043357	52071054	13	Hps4	NM_001107148	446.683	561.6	331.766	0.590752	-0.759376	4.64522e-09	5.82055e-07
chr7	-	12803937	12805661	5	Cfd	NM_001077642	111.244	139.849	82.64	0.590924	-0.758956	3.41564e-05	0.0013304
chr8	+	126290964	126943278	8	Ctdspl	NM_001106865	116.644	146.589	86.698	0.591434	-0.75771	0.00257945	0.0379405
chr10	+	67842259	67853168	7	Tmem98	NM_001007672	389.705	489.562	289.848	0.592056	-0.756194	1.81992e-08	1.90332e-06
chr10	-	87092252	87096248	7	Krt10	NM_001008804	62.8615	78.8981	46.825	0.593487	-0.752711	0.000605862	0.0131488
chr6	+	20146740	20231690	8	Eif3h	NM_198751	41.9068	52.5861	31.2275	0.593835	-0.751865	0.001161	0.021227
chr6	+	138712663	138728643	3	Gskip	NM_001014198	36.6163	45.9033	27.3294	0.595369	-0.748143	0.00685256	0.0776584
chr1	+	102596673	102619582	20	Plekha4	NM_199101	73.8387	92.5617	55.1157	0.595448	-0.747952	0.000273553	0.00708253
chr1	+	153101796	153120880	10	Haus7	NM_001277272	48.7941	61.1615	36.4267	0.595582	-0.747627	0.000937149	0.0183047
chr7	-	140110766	140123423	8	Cela1	NM_012552	79.8718	100.097	59.6467	0.595889	-0.746884	0.000139485	0.0041915
chr10	+	103720859	103725037	8	Galk1	NM_001008282	708.56	887.96	529.161	0.595929	-0.746788	5.46933e-09	6.72627e-07
chr15	+	2612541	2615653	7	Comtd1	NM_001107249	134.615	168.656	100.573	0.596319	-0.745844	1.64842e-05	0.000710856
chr1	+	154005927	154103294	9	Cyp2c6v1	NM_001013904	3600.53	4508.45	2692.6	0.597235	-0.743629	1.89949e-06	0.000106903
chr9	-	3191455	3717395	9	Sult1c2a	NM_001013177	88.2637	110.3	66.2274	0.600429	-0.735934	0.000188392	0.00525677
chr19	+	48996418	49013716	6	Pla2g15	NM_001004277	519.609	648.904	390.315	0.601499	-0.733365	0.000601183	0.0130925
chr1	-	125883340	125914101	2	Klf13	NM_001109147	36.8069	45.9633	27.6505	0.601578	-0.733176	0.00414222	0.0538326
chr16	+	26738366	26754806	6	Msmo1	NM_080886	737.18	920.084	554.277	0.60242	-0.731158	0.00839752	0.0898034
chr11	-	84461452	84489285	11	Kng2	NM_012741	946.079	1179.96	712.195	0.603575	-0.728396	4.53522e-05	0.001664
chr8	+	49151162	49152947	4	Apoa1	NM_012738	21339.7	26587.2	16092.3	0.605263	-0.724365	2.77022e-11	5.49165e-09
chr16	+	49875018	49898364	15	Klkb1	NM_012725	2995.66	3732.04	2259.27	0.605371	-0.724108	1.5548e-05	0.000674865
chr4	+	26377856	26382255	1	Fzd1	NM_021266	182.762	227.589	137.936	0.606075	-0.722433	5.16307e-05	0.00183358
chr20	-	7193731	7196332	6	Apom	NM_019373	2338.75	2910.59	1766.91	0.607063	-0.720083	2.1545e-05	0.000889405
chr7	+	129544587	129547908	4	Pim3	NM_022602	320.48	398.676	242.285	0.607724	-0.718512	0.00119122	0.0216053
chr2	+	144010440	144015083	3	Spry1	NM_001106427	56.0356	69.6292	42.442	0.609543	-0.714199	0.00096518	0.0187146
chr5	+	176107840	176114290	4	RGD1308923	NM_001108698	38.2382	47.5111	28.9653	0.609653	-0.713939	0.00910967	0.0946963
chr3	-	178609110	178612013	3	Atp5e	NM_139099	735.437	913.372	557.501	0.610377	-0.712228	2.122e-07	1.62916e-05
chr7	-	67528357	67532282	2	Avpr1a	NM_053019	1211.49	1504.22	918.766	0.610792	-0.711247	0.00124166	0.0221574
chr8	+	75483005	75523422	10	Aqp9	NM_022960	2058.6	2553.57	1563.63	0.612331	-0.707617	0.000274946	0.00710473
chr1	+	143088852	143091138	4	Hddc3	NM_001107528	109.799	136.031	83.5675	0.614328	-0.702919	9.43741e-05	0.00306693
chr4	-	187747329	187764590	10	Hdac11	NM_001106610	92.6162	114.603	70.6291	0.616292	-0.698314	0.00235666	0.0355695
chr14	+	2789912	2860566	5	Fam69a	NM_001170456	267.452	330.608	204.296	0.617942	-0.694457	0.0009885	0.0190832
chr6	-	118991547	119000513	6	RGD1310769	NM_001106749	640.605	791.707	489.502	0.618287	-0.693652	0.00211388	0.0327232
chr16	-	68580262	68593651	3	Eif4ebp1	NM_053857	140.311	173.366	107.255	0.618662	-0.692777	4.66748e-05	0.00170312
chr13	-	85607545	85639778	9	Fmo1	NM_012792	1431.63	1768.65	1094.6	0.61889	-0.692246	7.11116e-08	6.21384e-06
chr13	+	73676539	73683832	8	Ivns1abp	NM_001047085	679.82	839.553	520.088	0.619482	-0.690865	0.00275254	0.0396521
chr2	-	207816331	207826348	6	Fdps	NM_031840	409.503	505.598	313.409	0.619878	-0.689943	0.00147016	0.0250341
chr1	+	85468771	85490833	5	Blvrb	NM_001106236	532.649	657.47	407.828	0.6203	-0.688963	1.70594e-06	9.89443e-05
chr19	+	26391620	26431927	13	Ces1c	NM_017004	8337.55	10286.2	6388.87	0.621108	-0.687084	0.00287471	0.0410558
chr14	-	45855970	45934725	5	LOC498368	NM_001017500	373.34	460.5	286.18	0.621456	-0.686276	8.17908e-07	5.24805e-05
chr7	+	13225605	13233682	6	Ppap2c	NM_139252	122.822	151.383	94.2618	0.622672	-0.683455	0.000207422	0.00568323
chr10	-	16661967	16685040	4	Atp6v0e1	NM_053578	165.947	204.506	127.388	0.622903	-0.68292	3.70314e-05	0.00141309
chr13	-	107315400	107320809	4	Hlx	NM_001077674	41.2834	50.8621	31.7047	0.623346	-0.681896	0.0084426	0.090068
chr7	-	141393003	141400457	9	Krt8	NM_199370	277.282	341.385	213.178	0.624451	-0.67934	0.000512744	0.0115624
chr13	-	114555780	114562973	4	Nenf	NM_001002851	108.304	133.272	83.3368	0.625314	-0.677346	0.00109109	0.0203306
chr7	+	12075408	12086466	14	Mknk2	NM_001011985	1664.19	2047.81	1280.57	0.625339	-0.67729	0.00436387	0.0556247
chr16	+	83287184	83311239	2	Irs2	NM_001168633	442.624	544.19	341.058	0.626727	-0.674091	0.00619525	0.0723705
chr11	+	70706216	70733730	6	Fam162a	NM_001029903	67.8492	83.3882	52.3103	0.627311	-0.672748	0.00061323	0.013287
chr4	-	31935395	31955552	3	Shfm1	NM_001126090	592.564	727.937	457.191	0.628064	-0.671017	9.02587e-08	7.68472e-06
chr7	-	95120406	95202176	21	Enpp2	NM_057104	2402.4	2950.96	1853.83	0.628213	-0.670675	0.000652869	0.013808
chr11	+	67113607	67119381	3	Cox17	NM_053540	177.72	218.263	137.176	0.628489	-0.67004	5.54761e-05	0.00193712
chr1	+	248193533	248218136	2	Klf9	NM_057211	1143.65	1404.46	882.831	0.628591	-0.669807	1.08002e-06	6.67107e-05
chr7	+	116782279	116786865	11	Gsdmd	NM_001130553	288.116	353.816	222.415	0.628617	-0.669748	0.000162117	0.00468095
chr9	+	95188005	95207531	8	Spp2	NM_053577	12597.4	15461.8	9733.09	0.629493	-0.667738	3.03574e-09	4.1996e-07
chr10	+	107745907	107754738	6	Cbx2	NM_001107071	56.3834	69.177	43.5897	0.630119	-0.666303	0.0047873	0.0594251
chr1	+	226351248	226352917	4	Pold4	NM_001013195	379.681	465.663	293.7	0.630714	-0.664943	7.77302e-07	5.01171e-05
chr9	+	81731150	81760595	9	Cyp27a1	NM_178847	3694.96	4531.66	2858.26	0.630731	-0.664903	9.02976e-09	1.05205e-06
chr10	+	109367930	109378930	3	Anapc11	NM_001126082	228.947	280.282	177.611	0.633687	-0.658157	2.20414e-05	0.00090636
chr1	-	66471607	66475905	6	Rps5	NM_001277243	137.698	168.562	106.834	0.633797	-0.657906	9.70288e-05	0.00311476
chr3	-	2560662	2565936	9	Uap1l1	NM_001134516	68.1971	83.4819	52.9122	0.633817	-0.657863	0.0015953	0.026619
chr1	+	63493719	63521353	10	Nlrp12	NM_001169142	673.249	823.816	522.683	0.634465	-0.656387	8.51224e-08	7.34153e-06
chr3	+	139688331	139717718	11	Ndufaf5	NM_001126371	58.4721	71.4619	45.4823	0.636455	-0.651869	0.00242438	0.036426
chr10	+	15054532	15065361	5	RGD1307155	NM_001037188	61.3305	74.9547	47.7063	0.636469	-0.651838	0.00413304	0.053766
chrX	-	104555350	104562260	8	Tspan6	NM_001100672	127.828	156.155	99.5011	0.637194	-0.650195	0.000497497	0.011276
chr1	-	81860927	81865003	3	Apoc4	NM_001109419	2580.01	3151.64	2008.39	0.63725	-0.650068	3.82368e-08	3.65368e-06
chr20	-	57779371	57783907	9	Cd99	NM_001100804	306.326	373.827	238.825	0.638864	-0.646419	0.000302828	0.00758
chr10	+	84511736	84524393	9	Copz2	NM_001108294	117.288	143.062	91.514	0.639678	-0.644581	0.000468134	0.0108135
chr12	+	21630757	21634473	4	Lamtor4	NM_001108330	435.823	531.345	340.302	0.640453	-0.642835	2.16026e-07	1.64371e-05
chr15	+	31859204	31859642	1	Ang1	NM_001006992	322.152	392.687	251.617	0.640756	-0.642152	5.41261e-05	0.00190186
chr12	+	10842212	10858621	6	Slc46a3	NM_001024968	265.163	323.186	207.141	0.640933	-0.641754	0.00737352	0.081954
chr1	-	226180243	226182891	6	RGD1307603	NM_001134508	5138.88	6257.98	4019.78	0.642345	-0.63858	1.76088e-05	0.000747221
chr5	+	164019283	164033407	7	Agmat	NM_001048185	1037.42	1263.03	811.811	0.642748	-0.637675	6.91681e-05	0.0023317
chr2	+	140149971	140174575	6	RGD1560220	NM_001134640	147.983	180.111	115.855	0.643245	-0.63656	9.6042e-05	0.00311129
chr3	-	2778449	2779849	3	Phpt1	NM_001106558	168.079	204.555	131.602	0.643359	-0.636304	0.00621121	0.0724932
chr2	-	282680843	282760556	3	Ptger3	NM_012704	113.333	137.87	88.7958	0.644055	-0.634744	0.00272106	0.0393266
chr2	-	113334155	113397419	5	Chmp4c	NM_001017466	59.0837	71.8733	46.2942	0.644108	-0.634626	0.00595101	0.0698988
chr17	-	80136082	80208479	4	Fam107b	NM_001025034	502.627	611.422	393.832	0.644125	-0.634588	5.12572e-07	3.50927e-05
chr3	-	70062241	70081079	8	Prkra	NM_001024780	210.538	255.966	165.11	0.645045	-0.632529	7.13649e-06	0.000340137
chr7	+	11488464	11490985	3	Mrpl54	NM_001106770	54.9761	66.8051	43.1471	0.645865	-0.630695	0.00518692	0.0631463
chr5	-	154387823	154391541	3	Atpif1	NM_012915	78.838	95.7749	61.901	0.646317	-0.629685	0.00174733	0.028337
chr5	+	2621854	2624862	6	Rpl7	NM_001100534	119.292	144.916	93.6685	0.646363	-0.629582	0.00024128	0.0064222
chr1	-	152178405	152180608	7	Rpl10	NM_031100	79.8349	96.9318	62.738	0.647238	-0.627632	0.00166761	0.0274464
chr3	+	159308251	159309116	2	Scand1	NM_001108599	282.352	342.768	221.936	0.64748	-0.627092	1.75991e-05	0.000747221
chr9	+	81332620	81335075	3	Pnkd	NM_001134753	129.285	156.924	101.646	0.647744	-0.626504	0.000917336	0.0180238
chr10	+	82194188	82199949	4	Mrpl27	NM_001105831	324.936	394.135	255.737	0.648855	-0.624031	4.81252e-06	0.00023762
chr2	-	40996034	41137564	24	Msh3	NM_001191957	113.081	137.148	89.014	0.649039	-0.623624	0.000475701	0.0109312
chrX	-	33730549	33870223	19	Ctps2	NM_001034998	295.744	358.574	232.914	0.649555	-0.622477	3.60336e-05	0.00138323
chr20	-	28943837	28958143	9	Pbld1	NM_138530	573.501	695.153	451.848	0.649998	-0.621492	6.47631e-07	4.27952e-05
chr10	-	31097978	31235818	30	Cyfip2	NM_001106996	80.1338	97.1294	63.1383	0.650043	-0.621392	0.000964007	0.0187146
chr16	+	20174989	20180809	5	Ccdc124	NM_001106071	230.535	279.285	181.785	0.650893	-0.619508	0.00016294	0.00468434
chr7	-	3312813	3316422	4	Bloc1s1	NM_001105941	350.44	424.23	276.649	0.652119	-0.616792	2.05918e-06	0.000114916
chr12	+	24171370	24177687	9	Pcolce	NM_019237	91.2173	110.397	72.0374	0.65253	-0.615885	0.00109274	0.0203306
chr5	+	130705938	130732192	7	Hspb11	NM_001131002	66.3252	80.2704	52.38	0.652544	-0.615852	0.00281985	0.0404462
chr1	-	86620607	86623553	5	Rps16	NM_001169146	74.0401	89.5863	58.4938	0.652933	-0.614994	0.0017642	0.0285757
chr3	+	2606427	2612086	9	Npdc1	NM_001004231	64.0987	77.5568	50.6406	0.652949	-0.614959	0.00681609	0.0773111
chr19	-	64224824	64363108	9	Fbxo31	NM_001044259	641.422	775.957	506.887	0.653241	-0.614313	0.00342991	0.0465915
chr17	-	71510872	71530255	9	Akr1c14	NM_138547	8965.37	10845.8	7084.99	0.65325	-0.614292	2.89367e-06	0.000153026
chr13	+	53717938	53722976	5	Rab7l1	NM_133590	451.562	546.086	357.038	0.653812	-0.613052	0.000293578	0.00744142
chr6	-	144205802	144230967	5	Apopt1	NM_001037769	213.996	258.75	169.242	0.654077	-0.612468	3.9795e-05	0.0014931
chr16	-	22972706	23044750	9	Sh2d4a	NM_001012048	369.978	447.16	292.796	0.654789	-0.610899	9.07364e-06	0.000419917
chr1	+	216161434	216388310	5	Mgmt	NM_012861	259.605	313.715	205.495	0.655038	-0.610349	0.00147242	0.0250405
chr18	+	80739214	80770883	5	Cyb5a	NM_022245	3319.67	4010.88	2628.46	0.655332	-0.609702	2.41265e-08	2.44617e-06
chr1	-	102590676	102593734	3	Ppp1r15a	NM_133546	86.0352	103.904	68.1664	0.656051	-0.60812	0.00335422	0.0460234
chr16	-	20872443	20879034	6	Mef2bnb	NM_001145726	186.971	225.789	148.152	0.656154	-0.607895	5.30454e-05	0.0018788
chr9	-	15516927	15518751	4	Mea1	NM_001044286	191.824	231.57	152.079	0.656729	-0.606631	0.000165082	0.00469632
chrX	+	15882064	15885500	7	Rbm3	NM_053696	159.401	192.232	126.57	0.658425	-0.60291	0.000582017	0.0128839
chr4	+	67185339	67192419	4	Ndufb2	NM_001108624	331.118	399.196	263.041	0.658927	-0.601809	1.24923e-05	0.000564362
chr7	+	18878087	18883843	5	Cd320	NM_001014201	143.472	172.92	114.024	0.659402	-0.600771	0.000292346	0.00742435
chr8	+	84627767	84666187	16	Gclc	NM_012815	820.704	989.135	652.274	0.659439	-0.600689	9.12695e-07	5.74522e-05
chr6	+	2785888	2837635	7	Galm	NM_001007704	1147.24	1382.05	912.437	0.660207	-0.59901	1.272e-06	7.67942e-05
chr8	+	128006813	128010671	7	Rpsa	NM_017138	210.299	253.289	167.309	0.660547	-0.598268	0.000207527	0.00568323
chr5	-	132534673	132679334	22	Osbpl9	NM_001044234	885.126	1065.93	704.32	0.660756	-0.597811	4.13436e-07	2.89014e-05
chr19	+	48147513	48150214	6	Tmem208	NM_001106179	314.008	378.082	249.934	0.661058	-0.597151	1.71762e-05	0.00073355
chr1	+	221121399	221123321	5	Rassf7	NM_001106317	134.089	161.447	106.731	0.66109	-0.597082	0.000857189	0.0171206
chr7	+	129501500	129508348	10	Creld2	NM_001037208	380.341	457.892	302.789	0.661268	-0.596693	1.39131e-06	8.28672e-05
chr10	+	85767183	85774814	6	Rpl19	NM_031103	96.9463	116.702	77.1909	0.661438	-0.596323	0.00167639	0.0275226
chr3	-	165976712	165995482	4	Oser1	NM_201560	150.732	181.438	120.025	0.661523	-0.596138	0.000270583	0.00706068
chr9	-	18397064	18626606	5	Rcan2	NM_175578	166.789	200.63	132.947	0.662646	-0.59369	0.000690152	0.0143903
chr6	-	69536686	69538697	2	Arl4a	NM_019186	70.1865	84.3671	56.0058	0.663834	-0.591105	0.00249508	0.0371038
chr1	-	79432844	79445344	3	C5ar2	NM_001003710	64.1798	77.143	51.2166	0.663918	-0.590923	0.00234833	0.0354841
chr10	+	104447217	104462044	6	Fads6	NM_001107064	823.532	988.885	658.178	0.665576	-0.587324	2.61778e-06	0.000140766
chr7	-	71297359	71533937	4	Rdh7	NM_133543	5805.43	6966.92	4643.94	0.66657	-0.585171	1.31653e-07	1.07277e-05
chr5	-	140507400	140508917	3	Atp6v0b	NM_001106681	357.324	428.616	286.031	0.667336	-0.583515	2.11887e-05	0.000879464
chr2	+	270160841	270289319	6	Ddah1	NM_022297	598.4	717.456	479.344	0.668117	-0.581828	6.13689e-07	4.11668e-05
chr6	-	96299843	96311094	7	Fkbp3	NM_001106736	150.518	180.377	120.658	0.668921	-0.580093	0.000260512	0.00687895
chr1	-	266244625	266324921	9	Cyp2c13	NM_138514	12740.2	15258.7	10221.7	0.669894	-0.577995	1.49307e-07	1.19747e-05
chr2	+	103949820	104003059	4	Dap	NM_022526	1645.22	1970.42	1320.01	0.669912	-0.577956	2.33201e-07	1.74993e-05
chr9	-	99478496	99483427	3	Myeov2	NM_001109044	453.591	543.015	364.166	0.670637	-0.576397	2.63207e-06	0.000140965
chr6	+	109213898	109228034	4	Churc1	NM_001106741	280.872	336.158	225.586	0.67107	-0.575465	9.70872e-05	0.00311476
chr4	+	7844006	7850848	3	Tomm7	NM_001135174	89.7762	107.411	72.1417	0.671644	-0.574231	0.00295803	0.0418408
chr20	+	48112117	48202608	4	Foxo3	NM_001106395	157.49	188.425	126.556	0.671653	-0.574213	0.00652397	0.0748659
chr17	-	11147136	11548898	5	Txndc15	NM_001024998	186.247	222.731	149.764	0.672397	-0.572615	0.000218193	0.00595081
chr4	-	67414412	67417850	2	Mrps33	NM_001047863	209.498	250.205	168.791	0.67461	-0.567875	0.000152334	0.00446646
chrX	-	15414610	15423884	5	Dynlt3	NM_001013228	332.702	397.333	268.071	0.674675	-0.567734	0.000452744	0.0105128
chr7	+	27200203	27216018	8	Nfyb	NM_031553	242.05	289.023	195.077	0.674954	-0.567138	0.000109625	0.00344217
chr8	+	114519756	114529992	13	Pcbp4	NM_001191883	83.7051	99.9468	67.4634	0.674993	-0.567055	0.00665696	0.075765
chr1	+	79664959	79667668	3	Tmem160	NM_001106227	119.885	143.138	96.6322	0.6751	-0.566828	0.00370435	0.0495481
chr18	-	80841875	80846335	6	Timm21	NM_001008343	70.2934	83.8397	56.747	0.676851	-0.56309	0.00357873	0.0480614
chr7	+	11844859	11845963	3	Timm13	NM_145781	250.141	298.196	202.087	0.677698	-0.561285	0.000128041	0.00390054
chr10	+	89174545	89178117	5	Rnd2	NM_001010953	113.76	135.602	91.9172	0.677844	-0.560974	0.00915918	0.0949061
chr5	-	26010373	26106856	9	Car8	NM_001009662	429.727	512.022	347.431	0.678547	-0.559479	8.76806e-06	0.000407194
chr3	-	168962199	169044078	21	Sulf2	NM_001034927	324.425	386.289	262.562	0.679704	-0.557022	0.00594773	0.0698988
chr1	-	171765034	171807622	8	Mrpl48	NM_001106282	93.5116	111.323	75.7	0.680002	-0.556389	0.0019455	0.0307621
chr12	-	19332473	19345579	2	Gpr146	NM_001109062	282.522	336.03	229.015	0.68153	-0.553151	0.000123845	0.00380765
chr1	-	102182149	102184258	5	Rps11	NM_031110	83.4777	99.2855	67.6698	0.681568	-0.55307	0.00414945	0.0538739
chr7	+	28825281	28853308	10	Nup37	NM_001106775	56.0741	66.6766	45.4715	0.68197	-0.552219	0.00836815	0.0896978
chr7	-	74880031	74892505	4	Cox6c	NM_019360	570.306	678.067	462.544	0.682151	-0.551837	0.00773063	0.0849283
chr15	+	38146265	38149142	11	Psme1	NM_017264	427.393	508.017	346.768	0.682592	-0.550904	8.83489e-05	0.00289234
chr5	-	138702774	138710968	4	Uqcrh	NM_001009480	574.137	682.167	466.107	0.683274	-0.549463	1.52167e-05	0.000667026
chr7	-	123567780	123571638	3	Ndufa6	NM_001130505	914.581	1086.61	742.548	0.683359	-0.549285	3.05184e-06	0.000158959
chr9	-	13467178	13474021	4	RGD1308299	NM_001134596	69.8862	82.9625	56.8098	0.684765	-0.54632	0.00474424	0.0590009
chr1	-	273718179	273753576	5	Arl3	NM_022700	116.3	138.013	94.5875	0.685351	-0.545085	0.00922286	0.0952044
chr16	+	19623234	19625903	8	Use1	NM_001169100	310.962	368.953	252.972	0.685647	-0.544463	0.000101039	0.00320286
chr17	-	19889729	19905997	9	Tpmt	NM_001079531	272.806	323.55	222.062	0.686329	-0.543027	9.68309e-05	0.00311476
chr18	-	28940033	28997301	4	Pfdn1	NM_001108427	107.246	127.1	87.3916	0.687579	-0.540403	0.0015872	0.026566
chr17	+	32517374	32539061	9	Eci3	NM_001009275	2900.96	3436.99	2364.94	0.688086	-0.53934	0.00168992	0.0276764
chr1	-	95700173	95701643	1	Plekhf1	NM_001013148	101.464	120.211	82.7175	0.688104	-0.539302	0.00374865	0.0499896
chr20	-	19258271	19274206	8	Zwint	NM_147138	219.498	259.984	179.013	0.688553	-0.538361	0.000377356	0.00906337
chr10	-	29233971	29291344	27	Adra1b	NM_016991	424.433	502.323	346.542	0.689878	-0.535586	0.000851188	0.0170263
chr10	+	13813644	13819807	6	Nthl1	NM_001105728	70.9518	83.9523	57.9513	0.690288	-0.534729	0.00657883	0.0752528
chr2	+	243044079	243075190	7	Cnn3	NM_019359	438.054	518.179	357.93	0.690747	-0.53377	0.00101636	0.0195077
chr17	-	45329000	45358449	10	Slc17a1	NM_133554	398.325	470.911	325.739	0.691721	-0.531738	4.52766e-05	0.001664
chr4	-	178170533	178176345	4	Pole4	NM_001108634	137.193	162.189	112.197	0.691771	-0.531633	0.00628842	0.0729793
chr7	-	51286667	51365775	6	Pawr	NM_033485	151.921	179.57	124.272	0.692054	-0.531043	0.00255061	0.0375996
chr20	+	9109907	9143582	9	RGD735065	NM_199379	1571.37	1856.25	1286.49	0.69306	-0.528947	6.11778e-06	0.000296556
chr19	+	63062103	63080795	7	Wfdc1	NM_133581	80.7968	95.4103	66.1834	0.693671	-0.527676	0.00628304	0.0729793
chr12	+	24099332	24135596	12	Agfg2	NM_001107131	411.372	485.756	336.989	0.693741	-0.52753	9.80482e-05	0.00313047
chr8	+	14139543	14159121	2	Smco4	NM_001134584	133.421	157.497	109.344	0.694257	-0.526458	0.00136168	0.0236362
chr10	-	46096651	46161545	6	Pemt	NM_013003	3299.98	3893.77	2706.18	0.695002	-0.52491	5.57117e-06	0.00027406
chr3	+	17132598	17136665	5	Tor2a	NM_001007744	260.361	307.209	213.513	0.695008	-0.524898	0.000601296	0.0130925
chr3	-	87998490	88007648	12	Mapk8ip1	NM_053777	164.932	194.462	135.402	0.696293	-0.522233	0.00148537	0.0251321
chr1	+	229831483	229864267	5	Pla2g16	NM_017060	347.149	409.138	285.159	0.696975	-0.520821	0.00155393	0.0261588
chr3	-	67289965	67292422	5	Atp5g3	NM_053756	1445.41	1703.16	1187.65	0.697324	-0.5201	0.00253867	0.0374984
chr1	+	274938290	274942306	4	Sfr1	NM_001047856	156.381	184.253	128.509	0.697461	-0.519815	0.00715933	0.0803127
chr5	-	92618608	92701144	20	Tle1	NM_001173433	406.098	478.411	333.785	0.697695	-0.519331	4.83136e-05	0.0017485
chr1	-	102527135	102528980	4	Ftl	NM_022500	513.477	604.204	422.75	0.69968	-0.515232	2.56274e-05	0.00104093
chr12	-	25587571	25593124	4	Polr2j	NM_001105921	164.582	193.658	135.505	0.699709	-0.515172	0.00137953	0.0238269
chr14	+	44299225	44322226	12	Ugdh	NM_031325	1439.41	1693.64	1185.18	0.699784	-0.515018	0.000236622	0.00634815
chr12	-	13302065	13309469	6	Bud31	NM_053556	162.885	191.646	134.124	0.699853	-0.514876	0.00395209	0.0518692
chr19	-	60313299	60324057	5	Gcsh	NM_133598	298.944	351.708	246.179	0.699954	-0.514668	0.000315105	0.0078522
chr5	-	103442806	103596543	47	Mpdz	NM_019196	232.235	273.211	191.259	0.700041	-0.51449	0.00164775	0.0272546
chr8	-	6015752	6033451	7	Birc2	NM_021752	363.96	428.142	299.778	0.700183	-0.514196	0.00106777	0.0201486
chr11	-	90168057	90173103	5	Dgcr6	NM_001107080	173.305	203.849	142.761	0.700328	-0.513898	0.0016824	0.0275872
chr12	+	13260900	13267471	4	Atp5j2	NM_001271117	144.761	170.254	119.269	0.700538	-0.513465	0.00735952	0.0819355
chr12	-	40878295	40879065	1	Orai1	NM_001013982	256.115	301.193	211.036	0.700669	-0.513195	0.000426672	0.0099422
chr10	-	15010696	15012978	7	Stub1	NM_001025625	362.671	426.362	298.98	0.701236	-0.512029	0.000161243	0.00466586
chr1	-	203844088	203869649	9	Nsmce1	NM_001039611	138.961	163.355	114.566	0.701332	-0.51183	0.0015787	0.0264751
chr14	+	22705079	22724392	6	Ugt2b10	NM_001191676	126.166	148.172	104.16	0.702962	-0.508482	0.00346775	0.0470467
chr13	-	107401547	107432904	8	2002-03-01	NM_134410	1241.88	1458.48	1025.28	0.70298	-0.508443	1.9202e-05	0.000802017
chr20	+	42501162	42504695	4	Fabp7	NM_030832	956.572	1123.37	789.773	0.703038	-0.508325	0.00167229	0.0274893
chr4	+	64933164	64965930	10	Akr1d1	NM_138884	9657.37	11337.7	7977.03	0.703584	-0.507206	0.00157633	0.0264689
chr14	-	105098651	105109823	9	Ahsa2	NM_001107241	109.805	128.91	90.7006	0.703599	-0.507176	0.0071937	0.0806302
chr1	-	260199458	260222109	6	Slc16a12	NM_001191637	541.15	635.076	447.225	0.704207	-0.505929	0.00440446	0.055874
chr19	-	37050604	37060302	10	Rnaseh2a	NM_001013234	226.904	266.254	187.554	0.704418	-0.505497	0.000740396	0.0151993
chr4	+	39352536	39369349	9	Tmem106b	NM_001004267	540.878	634.479	447.277	0.70495	-0.504406	0.000770569	0.0157215
chr4	+	6770352	6816800	12	Prkag2	NM_184051	79.1734	92.8545	65.4922	0.705321	-0.503648	0.00805346	0.0875336
chr19	-	48776574	48779058	8	Psmb10	NM_001025637	330.615	387.733	273.497	0.705374	-0.503539	0.000897843	0.0177194
chr1	+	172337553	172585548	19	Fchsd2	NM_001107539	429.928	504.189	355.666	0.705422	-0.503441	0.00102112	0.0195708
chr17	-	45373768	45398194	13	Slc17a3	NM_153622	783.883	918.954	648.812	0.706033	-0.502193	2.87123e-05	0.00113499
chr3	-	157443738	157474042	13	Gss	NM_012962	318.509	373.218	263.801	0.706828	-0.50057	0.00173889	0.0282346
chr19	-	66095803	66097772	5	Aprt	NM_001013061	258.242	302.518	213.967	0.707288	-0.499631	0.00040029	0.00956232
chr17	-	78978378	79006698	9	Sephs1	NM_001104630	475.762	557.194	394.329	0.707706	-0.498777	0.00078212	0.015884
chr1	+	152095510	152096934	3	Lage3	NM_001106345	97.6845	114.394	80.9746	0.707855	-0.498474	0.00691956	0.0783509
chr2	-	215536944	215539631	9	Psmb4	NM_031629	1214.1	1421.63	1006.58	0.708046	-0.498085	1.55064e-05	0.000674865
chr1	-	229155315	229158301	6	Prdx5	NM_053610	1532.19	1793.62	1270.76	0.708488	-0.497185	1.33552e-05	0.000595246
chr10	-	9825848	9850500	11	Dnaja3	NM_001038596	264.658	309.772	219.544	0.708729	-0.496695	0.000373413	0.00901758
chr3	-	2112657	2119716	8	Arrdc1	NM_001100770	112.032	131.101	92.9628	0.709091	-0.495958	0.00730682	0.0816225
chr4	-	165020593	165023049	2	Vamp8	NM_031827	238.742	279.363	198.12	0.709184	-0.495768	0.000860729	0.0171397
chr3	+	157169533	157171180	4	Map1lc3a	NM_199500	156.771	183.434	130.108	0.709289	-0.495554	0.00937765	0.0963294
chr14	-	60179582	60190533	3	Smim20	NM_001134639	224.987	263.199	186.775	0.709634	-0.494853	0.000934193	0.0182739
chr8	+	131260784	131263282	3	Tmem42	NM_001191886	96.0263	112.333	79.7193	0.709667	-0.494786	0.00510489	0.0623335
chr12	-	49695251	49711443	11	Mvk	NM_031063	135.771	158.777	112.766	0.710212	-0.493679	0.00134085	0.0233924
chr2	+	2604478	2614391	3	Glrx	NM_022278	189.259	221.321	157.196	0.710264	-0.493574	0.00177013	0.0286028
chr2	-	222244278	222262430	2	Fam46c	NM_001014041	173.004	202.27	143.739	0.710629	-0.492831	0.0014436	0.0247086
chr8	-	22986956	22992693	4	Tmem205	NM_001106804	3083.6	3601.21	2566	0.712537	-0.488962	0.000261332	0.00688693
chr7	-	60289458	60296600	7	Yeats4	NM_001127527	421.604	492.373	350.836	0.712542	-0.488953	0.000262664	0.00690832
chr3	+	119494099	119504497	11	Ccndbp1	NM_001013204	135.829	158.615	113.042	0.712683	-0.488668	0.00708292	0.0797924
chr10	+	33920258	33939101	8	Gnb2l1	NM_130734	354.429	413.803	295.055	0.713032	-0.487961	0.000156444	0.00455677
chr1	-	16860050	16922985	10	Pex7	NM_001034147	117.852	137.563	98.1417	0.713432	-0.487153	0.00523079	0.0633639
chr1	-	37504216	37509877	4	Med10	NM_001106097	89.0797	103.976	74.1835	0.713469	-0.487077	0.00910985	0.0946963
chr9	+	69762336	69765059	6	Eef1b2	NM_001108799	280.831	327.78	233.882	0.713533	-0.486947	0.000405412	0.0096327
chrX	+	28985079	28987070	3	Tmsb4x	NM_031136	167.571	195.498	139.644	0.714299	-0.485399	0.00385684	0.0507696
chr13	-	52475836	52486554	6	C4bpb	NM_016995	4408.91	5142.22	3675.61	0.714789	-0.48441	1.05943e-05	0.000486787
chr19	+	34379543	34395130	3	Sall1	NM_001107415	522.552	609.354	435.75	0.715101	-0.483782	0.00134809	0.0234669
chr1	+	226216691	226218360	4	Cdk2ap2	NM_001109498	616.455	718.593	514.317	0.715728	-0.482516	3.27862e-05	0.00128442
chr14	-	92142187	92292689	11	Cobl	NM_001107236	289.449	337.398	241.499	0.715769	-0.482433	0.00028597	0.00729032
chr8	-	21712697	21717320	2	Fbxl12	NM_001025700	81.9673	95.5306	68.404	0.716042	-0.481884	0.00973044	0.0992624
chr7	-	116842452	116847953	7	Pycrl	NM_001011993	175.629	204.606	146.652	0.716751	-0.480456	0.00294692	0.0417281
chr1	+	232005790	232009471	9	Ubxn1	NM_001034829	496.233	577.972	414.495	0.717154	-0.479646	0.00018487	0.00516934
chr2	+	41137783	41162496	6	Dhfr	NM_130400	136.643	159.049	114.236	0.718245	-0.477453	0.00217177	0.033386
chr1	-	254383081	254408283	5	Ak3	NM_013218	668.307	777.761	558.852	0.71854	-0.47686	6.86624e-05	0.00232646
chr1	-	99549580	99563745	6	Etfb	NM_001004220	1928.35	2243.74	1612.97	0.718876	-0.476185	4.28954e-05	0.00159144
chr20	-	5896543	5898539	9	Hsd17b8	NM_212529	201.326	233.978	168.674	0.720895	-0.47214	0.00269056	0.0390557
chr10	-	98033516	98102726	39	Abca8a	NM_001281824	1658.84	1927.81	1389.87	0.720958	-0.472012	0.000714941	0.0148141
chr3	+	157129662	157150710	4	Dynlrb1	NM_131910	296.298	344.212	248.384	0.721602	-0.470726	0.000236559	0.00634815
chr19	+	35680096	35684435	3	Ndufb7	NM_001108442	530.924	616.725	445.123	0.721754	-0.470421	0.000281865	0.00721336
chr1	+	191272624	191380855	13	Insc	NM_001106285	167.756	194.835	140.677	0.722035	-0.469859	0.00349467	0.0473129
chr9	-	15550235	15554009	6	Mrpl2	NM_001034136	150.526	174.822	126.23	0.722052	-0.469825	0.00362512	0.0486352
chr16	-	80701558	80732410	15	Gas6	NM_057100	625.304	726.123	524.485	0.722308	-0.469314	0.00425733	0.0547908
chr16	+	53866813	53900250	9	Fgl1	NM_172010	7068.34	8207.54	5929.14	0.722401	-0.469127	0.000240521	0.00641485
chr12	+	19381856	19391335	3	Cox19	NM_001107126	197.894	229.747	166.042	0.722719	-0.468494	0.00241335	0.0363014
chr5	-	82488238	82498577	12	Alad	NM_012899	1207.38	1401.46	1013.3	0.723033	-0.467866	0.000152974	0.00447532
chr15	-	47157958	47185330	12	Kctd9	NM_001108871	172.32	200.013	144.627	0.723088	-0.467757	0.0024702	0.0369473
chr3	+	2164204	2243127	35	Pnpla7	NM_144738	1771.14	2055.11	1487.18	0.723651	-0.466634	0.00426949	0.0547908
chr4	+	211937474	211946617	4	Gabarapl1	NM_001044294	2209.06	2561.72	1856.41	0.724674	-0.464595	0.000463642	0.0107284
chr10	+	108007822	108024833	20	Gaa	NM_199118	848.991	984.341	713.641	0.724994	-0.46396	0.000144925	0.00431591
chr13	-	95938117	95938914	2	Apcs	NM_017170	13224.4	15325.5	11123.3	0.725802	-0.462352	0.00444233	0.0561934
chr10	-	66119397	66129873	3	Sdf2	NM_001105803	321.304	372.255	270.353	0.726257	-0.461448	0.000481256	0.0110398
chr2	+	209356225	209361935	3	S100a16	NM_001108557	190.276	220.42	160.132	0.726484	-0.460997	0.00275206	0.0396521
chr2	+	218452669	218484881	9	Pdzk1	NM_031712	508.508	588.669	428.346	0.727651	-0.458681	0.0053116	0.0637873
chr7	+	98385289	98446224	22	Tbc1d31	NM_001134842	122.397	141.653	103.142	0.728131	-0.45773	0.00904721	0.0943211
chr2	-	208629065	208677779	10	Il6r	NM_017020	1554.35	1798.85	1309.85	0.728155	-0.457682	2.72819e-05	0.00109144
chr3	-	57578227	57695025	14	Grb14	NM_031623	853.999	988.255	719.744	0.728298	-0.457399	0.000190049	0.00529188
chr1	+	284451954	284486016	13	Habp2	NM_001001505	2326.86	2692.64	1961.08	0.728311	-0.457374	7.25326e-05	0.00243277
chr10	+	56346406	56349342	4	Gabarap	NM_172036	232.599	269.143	196.056	0.728446	-0.457107	0.00189928	0.0301389
chr12	-	39776738	39778884	5	Arl6ip4	NM_001025630	222.716	257.667	187.764	0.728708	-0.456587	0.00208069	0.0323604
chr20	+	7586193	7590951	15	Phf1	NM_212538	157.994	182.775	133.213	0.728837	-0.456332	0.00916967	0.0949061
chr17	+	32865486	32893956	5	Pxdc1	NM_001025719	446.585	516.413	376.757	0.729565	-0.454892	0.000519871	0.0116835
chr7	-	121287082	121292461	10	Rpl3	NM_198753	316.484	365.947	267.021	0.729671	-0.454683	0.000366879	0.00889214
chr4	-	51368668	51377022	5	Ndufa5	NM_012985	120.627	139.478	101.775	0.729686	-0.454653	0.00627743	0.0729793
chr11	+	71580310	71666275	17	Pdia5	NM_001014125	293.204	339.012	247.397	0.729758	-0.45451	0.00148149	0.0251305
chr5	-	63675135	63677391	5	Hint2	NM_001107955	516.467	597.05	435.885	0.730064	-0.453905	0.000299677	0.00753847
chr10	+	104468589	104477279	12	Fdxr	NM_024153	128.717	148.792	108.642	0.730162	-0.453711	0.00833544	0.0896447
chr18	-	62600259	62671839	10	Ptpn2	NM_053990	114.281	132.091	96.4704	0.730331	-0.453378	0.00763437	0.0843591
chr2	-	47094813	47114992	12	Hexb	NM_001011946	174.546	201.705	147.386	0.730698	-0.452652	0.00423638	0.0545758
chr5	-	175760761	175763365	7	Fam213b	NM_001108697	160.788	185.769	135.806	0.731049	-0.451959	0.00653459	0.0748857
chr10	+	46837697	46884559	7	Dhrs7b	NM_001008507	149.483	172.698	126.268	0.731149	-0.451762	0.00437033	0.0556536
chr7	+	18861152	18873932	4	Ndufa7	NM_001106772	80.27	92.7306	67.8095	0.731252	-0.451559	0.00958683	0.0980233
chr3	-	149628695	149632565	3	Cst3	NM_012837	140.351	162.072	118.631	0.731965	-0.450153	0.00734802	0.0818762
chr13	-	83972563	83983110	5	Prdx6	NM_053576	377.761	436.065	319.458	0.732592	-0.448918	0.000497044	0.011276
chr7	-	12596915	12600002	4	Atp5d	NM_139106	864.963	998.341	731.586	0.732801	-0.448506	0.000150535	0.00443326
chrX	+	119173342	119266236	16	Pls3	NM_031084	991.734	1144.46	839.011	0.733109	-0.4479	0.000277535	0.00714384
chr1	+	84417667	84491180	9	Cyp2b3	NM_173294	6315.78	7287.85	5343.72	0.733236	-0.44765	0.000581834	0.0128839
chr11	-	92071680	92313960	19	Spidr	NM_001100988	171.006	197.282	144.731	0.733624	-0.446887	0.00426546	0.0547908
chr4	+	143423968	143432792	4	Malsu1	NM_001106593	154.24	177.938	130.542	0.733633	-0.446869	0.00309412	0.043259
chr5	-	146614722	146615760	3	RGD1559909	NM_001108678	127.759	147.347	108.17	0.734118	-0.445916	0.0079615	0.0866759
chr7	-	116820230	116829245	8	Eef1d	NM_001013104	286.295	330.03	242.559	0.73496	-0.444263	0.00221903	0.0338772
chr1	+	275040048	275050033	6	Gsto1	NM_001007602	956.398	1102.38	810.416	0.735151	-0.443888	0.000164888	0.00469632
chr5	+	83481866	83488047	3	Atp6v1g1	NM_001106660	589.864	679.842	499.887	0.735299	-0.443598	0.000336124	0.00828276
chr2	+	269129473	269162554	5	2015-09-01	NM_133297	1513.88	1744.53	1283.24	0.735583	-0.443039	0.000116304	0.00362618
chr7	+	78244519	78262018	7	Slc25a32	NM_001173334	181.658	209.253	154.063	0.736254	-0.441724	0.00230244	0.03487
chr7	-	116814955	116818403	13	Naprt1	NM_207609	921.983	1061.74	782.228	0.736743	-0.440766	0.00672209	0.0763754
chr1	+	84925732	84938420	10	Cyp2a1	NM_012692	693.169	797.993	588.346	0.737282	-0.439712	0.0055191	0.0657441
chr3	+	126960532	127017986	21	Nphp1	NM_001106506	143.269	164.927	121.611	0.737363	-0.439553	0.00381776	0.0505241
chr1	+	236673094	236705927	6	Glyatl2	NM_134330	761.869	877.02	646.719	0.737406	-0.43947	0.00030304	0.00758
chr15	+	8452789	8455192	3	Mrps16	NM_001109518	249.792	287.503	212.08	0.737662	-0.438968	0.00381917	0.0505241
chr12	-	48588974	48592243	7	Rplp0	NM_022402	246.775	283.848	209.703	0.738786	-0.436771	0.00137097	0.0237392
chr1	+	219493092	219518141	8	Paox	NM_001106311	230.155	264.629	195.682	0.739459	-0.435458	0.00510607	0.0623335
chr8	+	53635071	53636452	2	Timm8b	NM_022541	278.924	320.649	237.199	0.739744	-0.434902	0.00321357	0.0445074
chr10	+	45308879	45312028	4	Mrpl55	NM_001105782	126.223	145.096	107.35	0.739857	-0.434681	0.00450531	0.0568454
chr19	+	36922601	36925151	2	Gadd45gip1	NM_001100504	156.514	179.759	133.269	0.741377	-0.43172	0.0050061	0.0614242
chr1	-	58399237	58418261	6	Psmb1	NM_053590	1190.72	1367.45	1013.99	0.74152	-0.431442	0.000226514	0.00616507
chr7	+	141720702	141725441	6	Pfdn5	NM_001106794	299.184	343.586	254.782	0.741539	-0.431406	0.00316479	0.0439694
chr1	-	142574432	142615225	5	Ap3s2	NM_001115039	199.6	229.052	170.148	0.742834	-0.428887	0.00311575	0.0434699
chr1	-	90170908	90172105	4	Psenen	NM_001008764	475.771	545.871	405.67	0.743161	-0.428254	0.00116974	0.021312
chr1	-	102875333	102882171	12	Cyth2	NM_053911	146.723	168.326	125.119	0.743311	-0.427961	0.00881361	0.0930544
chr5	+	62676350	62683436	13	Il11ra1	NM_139116	331.059	379.733	282.385	0.74364	-0.427324	0.00315704	0.0439076
chr1	-	75779796	75803045	8	Hspbp1	NM_139261	211.979	243.037	180.92	0.744415	-0.42582	0.00342276	0.046579
chr1	+	200483631	200489429	6	Aqp8	NM_019158	1162.95	1333.01	992.883	0.744843	-0.424991	0.000281471	0.00721336
chr7	-	36695608	36711834	5	Nudt4	NM_053598	1843.6	2113.05	1574.16	0.74497	-0.424746	0.000196854	0.00545849
chr3	+	181692297	181698641	7	Psma7	NM_001008217	468.433	536.862	400.005	0.745079	-0.424535	0.00124145	0.0221574
chr7	+	99411586	99417933	4	Ndufb9	NM_001127294	895.069	1025.54	764.598	0.745556	-0.423611	0.000361469	0.00880923
chr1	-	232247185	232267027	7	Asrgl1	NM_145089	229.267	262.664	195.87	0.745705	-0.423323	0.00343069	0.0465915
chr1	+	152081055	152083908	4	Ubl4a	NM_001106346	188.078	215.46	160.695	0.745822	-0.423097	0.00630324	0.0730538
chr5	+	176723858	176728389	4	Mrpl20	NM_001109428	178.065	203.973	152.157	0.745968	-0.422814	0.00500847	0.0614242
chr3	-	20672276	20685979	5	Ndufa8	NM_001047862	742.901	850.966	634.835	0.746017	-0.42272	0.000228641	0.00621025
chr6	-	6994175	7007338	10	Haao	NM_020076	2151.67	2464.53	1838.8	0.746104	-0.422551	0.00113384	0.0208583
chr2	-	217825097	217826113	2	Bola1	NM_001071776	184.635	211.357	157.913	0.747138	-0.420553	0.00798075	0.0868143
chrX	+	43801422	43816649	7	Prdx4	NM_053512	1142.28	1307.47	977.083	0.747306	-0.42023	0.000295206	0.00745423
chr1	-	147672437	147750196	7	Zfand6	NM_001007630	622.499	711.813	533.186	0.749054	-0.416859	0.000636619	0.0135073
chr2	-	104340313	104351466	11	Cct5	NM_001004078	788.191	900.741	675.642	0.750096	-0.414854	0.00452557	0.056975
chr1	-	90639291	90643313	8	Fxyd1	NM_031648	683.589	781.113	586.065	0.750295	-0.41447	0.00473029	0.0589207
chr2	+	166941148	166956371	5	Tm4sf4	NM_053785	2208.83	2523.88	1893.78	0.750342	-0.41438	0.000463151	0.0107284
chr1	+	180523028	180532009	8	Eif3f	NM_001277302	846.287	966.818	725.757	0.750665	-0.413759	0.000251955	0.00667957
chrX	+	2580318	2582577	3	Ndufb11	NM_001106756	748.168	854.561	641.776	0.751001	-0.413114	0.00120765	0.0218306
chr1	+	108304938	108405240	7	Gas2	NM_001127504	784.825	896.242	673.408	0.751369	-0.412407	0.00098915	0.0190832
chr2	+	262262935	262275343	9	Adh5	NM_001126120	1333.3	1522.22	1144.37	0.751773	-0.411631	0.000413628	0.00972916
chr16	+	18604749	18610789	5	Mbl1	NM_012599	1459.93	1666.39	1253.46	0.752199	-0.410813	0.00142749	0.0244961
chr16	-	81288535	81307842	8	F10	NM_017143	5271.43	6015.43	4527.43	0.752637	-0.409974	0.000303882	0.00758676
chr7	-	15357399	15384091	13	Cyp4f6	NM_153318	346.617	395.528	297.707	0.752683	-0.409886	0.00182148	0.0292419
chr10	-	104316048	104322545	6	Ict1	NM_001191656	144.226	164.554	123.897	0.752926	-0.409419	0.0095613	0.0979886
chr8	+	71388619	71394477	5	Ppib	NM_022536	2831.96	3230.63	2433.3	0.753196	-0.408902	0.00441104	0.0559041
chr1	-	173285051	173347260	9	Rnf121	NM_001107540	165.859	189.159	142.559	0.753646	-0.408042	0.00534579	0.0641398
chr3	-	28115648	28176245	8	Psmb7	NM_053532	405.447	462.332	348.562	0.753922	-0.407512	0.00219054	0.0336001
chr2	-	65403196	65515243	5	Ndufs4	NM_001025146	352.415	401.855	302.975	0.753942	-0.407474	0.00324987	0.0449165
chr8	-	114720829	114748300	6	Tex264	NM_001007665	669.085	762.888	575.282	0.754084	-0.407203	0.00219865	0.0336823
chr8	-	47286248	47293618	14	Hmbs	NM_013168	303.71	346.268	261.152	0.754188	-0.407003	0.00351835	0.0473964
chr5	-	130684404	130705517	8	Lrrc42	NM_001025653	162.33	184.97	139.69	0.755206	-0.405058	0.00970588	0.0991642
chr6	+	118461005	118509830	12	Zfyve1	NM_001106743	304.354	346.75	261.959	0.755467	-0.404559	0.00297043	0.0419269
chr7	-	117672421	117676270	10	Vps28	NM_001130492	403.919	460.121	347.717	0.755708	-0.404099	0.000930691	0.0182322
chr5	+	64013653	64031649	7	Clta	NM_031974	954.293	1086.87	821.715	0.756038	-0.40347	0.000860276	0.0171397
chr15	+	36955393	36958618	5	Mrpl52	NM_001108375	475.304	541.271	409.337	0.756252	-0.40306	0.0021069	0.0327232
chr13	-	55534038	55551850	3	Etnk2	NM_001108343	710.233	808.682	611.784	0.756519	-0.402552	0.000910986	0.0179255
chr20	-	5524707	5535214	13	Flot1	NM_022701	257.298	292.953	221.642	0.75658	-0.402435	0.00536408	0.0643012
chr1	-	85556091	85567834	12	Pld3	NM_001012167	328.647	374.189	283.105	0.756581	-0.402433	0.00386094	0.0507733
chr8	+	105891159	105912681	4	Rbp1	NM_012733	684.346	779.119	589.574	0.756718	-0.402171	0.00286527	0.0410092
chr3	+	98121988	98136421	6	Commd9	NM_001033692	164.27	186.934	141.605	0.757514	-0.400656	0.00822505	0.0886146
chr17	-	17930058	17945126	4	Ninj1	NM_012867	1075.52	1223.73	927.316	0.757778	-0.400154	0.00523702	0.0633639
chr15	-	8126672	8127855	3	Chchd1	NM_001108369	222.963	253.679	192.247	0.757835	-0.400044	0.00894847	0.0938811
chr6	-	115043171	115059292	7	Rdh11	NM_001012193	439.712	500.201	379.223	0.758142	-0.399461	0.00113093	0.0208337
chr1	-	264286997	264294200	6	Rbp4	NM_013162	57246.9	65112.9	49380.9	0.758389	-0.398989	0.00017436	0.00490646
chr8	-	47724881	47728489	3	Ttc36	NM_001005546	739.077	840.574	637.58	0.758505	-0.398769	0.00326126	0.0449872
chr14	-	82054921	82113952	15	Add1	NM_016990	701.579	797.221	605.938	0.760062	-0.395811	0.000669409	0.014046
chr20	-	11461654	11479674	6	Glo1	NM_207594	447.589	508.567	386.611	0.760197	-0.395554	0.00289287	0.0411382
chr5	-	139650562	139654649	10	Urod	NM_019209	518.414	588.997	447.831	0.760328	-0.395306	0.00142547	0.0244931
chr14	+	22057305	22070529	7	Sult1b1	NM_022513	3192.32	3626.78	2757.86	0.760417	-0.395138	0.00453759	0.0570658
chr17	-	45421913	45438537	12	Slc17a2	NM_001107353	1052.05	1195.12	908.972	0.760568	-0.39485	0.00627168	0.0729793
chr18	+	24422407	24460482	9	Lims2	NM_001012163	352.675	400.509	304.84	0.761131	-0.393783	0.00859373	0.0913136
chr1	-	79101201	79108671	12	Gltscr2	NM_207591	296.722	336.904	256.539	0.76146	-0.39316	0.00784042	0.0856386
chr1	+	90110666	90123506	8	Prodh2	NM_001038588	1282.97	1455.51	1110.43	0.762914	-0.390407	0.00161299	0.0268468
chr10	-	40092955	40148290	26	Anxa6	NM_024156	1512.18	1715.43	1308.93	0.763031	-0.390187	0.000615878	0.013301
chr10	+	5842866	5856464	4	Carhsp1	NM_152790	1054.9	1196.69	913.112	0.763034	-0.390181	0.000655308	0.0138245
chr16	-	18711539	18728708	7	Sin3b	NM_001115038	339.129	384.61	293.649	0.763497	-0.389306	0.00457281	0.0574065
chr2	-	74628921	74659423	11	Cfi	NM_024157	10684.8	12116.4	9253.2	0.763692	-0.388937	0.000793495	0.0160414
chr5	-	160425714	160437827	4	Pink1	NM_001106694	538.713	610.861	466.564	0.76378	-0.388771	0.00279238	0.0400955
chr7	-	12731045	12738842	10	Wdr18	NM_001039027	158.351	179.553	137.148	0.763834	-0.388669	0.00851932	0.0907407
chr3	-	2706028	2709029	7	C8g	NM_001106555	3121.73	3539.17	2704.28	0.764098	-0.38817	0.000413833	0.00972916
chr12	+	24677438	24688360	5	Ap1s1	NM_001108331	370.068	419.468	320.668	0.764465	-0.387478	0.0026113	0.0383125
chrX	-	2626524	2641949	7	Rgn	NM_031546	6678.05	7569.1	5786.99	0.764554	-0.38731	0.000432187	0.0100531
chr1	+	81683534	81690450	6	Trappc6a	NM_001109410	238.607	270.445	206.77	0.764556	-0.387307	0.00695426	0.0786768
chr19	-	36932393	36937289	9	Calr	NM_022399	9402.47	10656.9	8148.07	0.764584	-0.387254	0.00740885	0.0822779
chr4	-	59822341	60099177	8	Chchd3	NM_001106588	417.314	472.842	361.787	0.765133	-0.386218	0.00173463	0.0281999
chr10	-	89164913	89172532	7	Vat1	NM_001033683	1253.68	1420.35	1087	0.765306	-0.385892	0.00119231	0.0216053
chr15	+	22418159	22449498	16	Acox2	NM_145770	7596.27	8604.67	6587.87	0.765616	-0.385308	0.000485425	0.0111162
chr1	+	236226270	236239942	5	Glyat	NM_001009648	1367.4	1548.49	1186.3	0.766098	-0.384399	0.000631829	0.0134324
chr9	-	10040658	10046879	13	Mpnd	NM_001085406	760.369	861.049	659.689	0.766146	-0.384309	0.00366712	0.049149
chr1	-	177591011	177592280	5	Taf10	NM_001134735	430.293	487.196	373.39	0.766406	-0.383819	0.00205224	0.0321058
chr7	-	123610229	123614634	9	Cyp2d1	NM_153313	422.908	478.766	367.05	0.766658	-0.383344	0.00210915	0.0327232
chr5	+	161499602	161508628	7	Akr7a2	NM_134407	930.872	1053.75	807.995	0.766782	-0.383112	0.0012121	0.021844
chr8	+	49189008	49198583	14	Zfp259	NM_001137646	324.644	367.326	281.963	0.767609	-0.381556	0.00772481	0.0849283
chr7	+	2716177	2720782	6	Cnpy2	NM_001077585	760.552	860.323	660.782	0.768063	-0.380704	0.00102855	0.0196568
chr5	-	139278241	139294867	9	Akr1a1	NM_031000	2530.76	2862.65	2198.86	0.768121	-0.380594	0.000317742	0.00788832
chr1	-	152743843	152747716	6	Ssr4	NM_017199	606.482	685.763	527.201	0.768779	-0.379359	0.00267103	0.0389853
chr10	-	45909609	45928697	13	Flcn	NM_199390	423.139	478.434	367.844	0.76885	-0.379226	0.00472862	0.0589207
chr15	-	37143057	37147105	3	Psmb5	NM_001105727	1057.03	1194.95	919.099	0.76915	-0.378662	0.000798224	0.0161
chr6	-	136828855	136850880	6	Serpina1	NM_022519	183756	207727	159784	0.769204	-0.378562	0.000290381	0.00738859
chr9	+	92645769	92659607	6	Itm2c	NM_001009674	330.802	373.943	287.661	0.769265	-0.378447	0.00604784	0.070829
chr12	-	13341710	13363473	9	Arpc1a	NM_031146	482.353	544.835	419.871	0.770639	-0.375872	0.00268045	0.0390557
chr20	+	5519550	5523476	4	Tubb5	NM_173102	533.234	602.303	464.165	0.770649	-0.375854	0.00539296	0.064589
chr7	-	12488475	12495748	8	Ndufs7	NM_001008525	605.766	684.064	527.469	0.771082	-0.375044	0.00248269	0.0370091
chr8	+	60228923	60308851	13	Ptpn9	NM_001013040	269.337	304.131	234.543	0.77119	-0.374842	0.00772143	0.0849283
chr1	+	168576273	168582497	3	Ndufc2	NM_001009290	287.702	324.851	250.554	0.771289	-0.374656	0.00420065	0.0543262
chr8	+	116466117	116467216	2	Gpx1	NM_030826	6803.52	7681.08	5925.97	0.771502	-0.374259	0.00469604	0.0587315
chr9	+	82205718	82213929	9	Dnajb2	NM_001109541	417.785	471.577	363.994	0.771865	-0.37358	0.00707131	0.0797532
chr1	+	22337120	22358779	2	Smlr1	NM_001195606	584.76	659.98	509.539	0.772052	-0.37323	0.00170163	0.0278338
chr4	+	143146983	143150058	6	Tmem176a	NM_001039008	1854.6	2093.11	1616.09	0.772099	-0.373142	0.00131371	0.0230194
chr5	+	67711880	67720091	4	Sec61b	NM_001106654	724.711	817.81	631.612	0.772321	-0.372728	0.00100078	0.0192364
chr10	+	83661433	83673397	8	Snf8	NM_001007804	330.825	373.235	288.415	0.772742	-0.371941	0.00526234	0.0634826
chr1	+	66387831	66398425	10	Slc27a5	NM_024143	11934.7	13461	10408.4	0.77323	-0.371031	0.00163041	0.0270015
chr9	+	10049872	10055404	11	Stap2	NM_001025026	470.982	531.193	410.771	0.773298	-0.370903	0.0024821	0.0370091
chr2	+	134112978	134144420	11	Slc2a2	NM_012879	2889.33	3257.86	2520.8	0.773761	-0.370041	0.000569029	0.0126597
chr10	+	109251299	109255803	5	Mrpl12	NM_001029900	353.107	398.088	308.127	0.774016	-0.369565	0.00339384	0.0464232
chr12	+	43452898	43472081	12	Plbd2	NM_139255	1608.04	1812.68	1403.41	0.774216	-0.369191	0.00836808	0.0896978
chr12	-	14374634	14383317	4	Bri3	NM_001009604	446.953	503.59	390.316	0.775067	-0.367607	0.00379756	0.0504361
chr1	-	89292311	89299144	7	Psmd8	NM_001100831	380.86	429.073	332.648	0.775271	-0.367227	0.00400848	0.05252
chr13	+	116425024	116444232	8	Irf6	NM_001108859	609.109	686.057	532.162	0.775682	-0.366463	0.00269845	0.0391275
chr12	-	50135333	50157417	12	Dao	NM_053626	1174.99	1323.36	1026.62	0.775772	-0.366296	0.00400958	0.05252
chr12	+	48817757	48820811	3	Cox6a1	NM_012814	863.457	971.82	755.093	0.776988	-0.364036	0.00268537	0.0390557
chr1	-	54275045	54286667	5	Mpc1	NM_133561	576.398	648.546	504.25	0.777509	-0.363069	0.007254	0.0811007
chr8	+	114514610	114518648	4	Abhd14b	NM_001007664	2693.52	3029.75	2357.3	0.77805	-0.362066	0.0017774	0.0286846
chr10	-	72063587	72095167	12	Ggnbp2	NM_001004273	716.403	805.806	627	0.778103	-0.361967	0.00527771	0.0635526
chr13	+	98149437	98178702	15	Kmo	NM_021593	1510.8	1699.26	1322.35	0.778187	-0.361811	0.00239029	0.0359953
chr18	-	27777576	28014973	10	Sil1	NM_199376	477.149	536.554	417.745	0.77857	-0.361101	0.0082263	0.0886146
chr7	-	119606997	119613747	2	Tst	NM_012808	2330.37	2620.35	2040.4	0.778674	-0.360909	0.0010862	0.0203306
chr3	+	119955947	119959536	3	Serf2	NM_001098782	371.714	417.726	325.701	0.7797	-0.359009	0.00929763	0.0957295
chr10	-	13905855	13908017	4	Ndufb10	NM_001109443	452.003	507.807	396.199	0.780216	-0.358055	0.00340952	0.0464941
chr4	+	178572214	178575203	12	Aup1	NM_001079899	1155.39	1297.66	1013.11	0.780718	-0.357127	0.00121679	0.0218873
chr12	+	13309877	13320105	6	Pdap1	NM_022595	443.913	498.478	389.348	0.781074	-0.356468	0.00748384	0.0830314
chr9	+	9443625	9446493	4	LOC301124	NM_001134533	896.422	1006.52	786.324	0.78123	-0.35618	0.00292334	0.0414746
chr11	-	90969512	90980515	6	Serpind1	NM_024382	8781.35	9857.32	7705.38	0.781691	-0.35533	0.000694456	0.0144573
chr3	+	14185689	14199075	11	Phyhd1	NM_001013081	1130.3	1268.33	992.264	0.782341	-0.35413	0.00347444	0.0470893
chr5	+	73997215	74012017	6	Nipsnap3b	NM_001009422	653.769	733.484	574.054	0.78264	-0.353579	0.00433025	0.0554623
chr1	-	142830040	142849360	11	Idh2	NM_001014161	409.316	459.16	359.472	0.782889	-0.35312	0.00420511	0.054331
chr1	-	143685593	143711945	6	Sec11a	NM_031723	509.503	571.531	447.474	0.782939	-0.353028	0.00438034	0.0556854
chr8	+	47335909	47341994	9	Slc37a4	NM_031589	2152.75	2414.63	1890.88	0.783093	-0.352745	0.00103765	0.0197735
chr7	+	12341263	12345892	3	Uqcr11	NM_001126097	603.596	676.919	530.273	0.783362	-0.352248	0.00372093	0.0497198
chr16	-	20718606	20725280	5	Cope	NM_001106076	510.099	572.047	448.152	0.783418	-0.352146	0.00819267	0.0883957
chr1	-	101619977	101625283	10	Nr1h2	NM_031626	583.965	654.663	513.268	0.784019	-0.35104	0.00899761	0.0940994
chr5	-	130744424	130760658	4	Dio1	NM_021653	2111.76	2366.3	1857.23	0.784869	-0.349476	0.000964832	0.0187146
chr7	-	27345729	27359757	18	Hsp90b1	NM_001012197	5629.75	6307.71	4951.79	0.785039	-0.349165	0.000808257	0.016241
chr11	-	84799839	84805423	6	Ahsg	NM_012898	127111	142228	111993	0.787419	-0.344797	0.00119023	0.0216053
chr7	+	130011950	130027605	21	Ncaph2	NM_001024877	285.47	319.283	251.658	0.7882	-0.343366	0.00930765	0.0957585
chr8	+	58114614	58122075	9	Psma4	NM_017281	918.757	1027.24	810.271	0.788782	-0.342301	0.00252604	0.0373926
chr7	-	99419330	99557952	16	Mtss1	NM_001130563	1679.82	1878.01	1481.63	0.788937	-0.342018	0.00134108	0.0233924
chr10	-	13352992	13358037	3	Atp6v0c	NM_130823	733.97	820.441	647.499	0.789209	-0.341521	0.00641122	0.0739825
chr2	+	207354106	207362738	6	Ssr2	NM_001106442	570.132	637.297	502.966	0.789218	-0.341505	0.00225841	0.03436
chr5	+	65037812	65047242	9	Grhpr	NM_001113754	4949.17	5531.62	4366.73	0.789413	-0.341148	0.00171446	0.0279404
chr2	+	138791053	138804599	6	Ndufb5	NM_001106426	377.412	421.757	333.068	0.789717	-0.340592	0.00875311	0.0927844
chr12	+	40729051	40740668	14	Hpd	NM_017233	17408.7	19449.2	15368.2	0.79017	-0.339764	0.00116446	0.0212449
chr18	-	72002638	72038286	5	Pqlc1	NM_001013189	989.936	1105.35	874.519	0.791168	-0.337945	0.00296573	0.0419052
chr7	-	123636788	123640858	9	Cyp2d2	NM_012730	8499.87	9488.93	7510.82	0.791535	-0.337275	0.0043854	0.0556854
chr20	+	32486248	32491730	4	Pcbd1	NM_001007601	2271.31	2535.59	2007.03	0.791543	-0.33726	0.00206472	0.0322251
chrX	+	15832772	15839093	5	Ebp	NM_057137	1549.38	1729.4	1369.37	0.791819	-0.336757	0.00479477	0.0594623
chr7	-	11626347	11645695	11	Map2k2	NM_133283	1312.61	1462.42	1162.8	0.795125	-0.330746	0.00624209	0.0727642
chr1	-	102151856	102161139	6	Fcgrt	NM_033351	1384.88	1542.7	1227.06	0.795396	-0.330256	0.00779173	0.0853876
chr6	+	60260821	60268039	6	Iah1	NM_001100540	601.517	670.065	532.968	0.795398	-0.330251	0.00785896	0.0857101
chr1	-	226013895	226017215	7	Ndufs8	NM_001106322	838.933	934.335	743.53	0.795785	-0.329549	0.00503084	0.0616417
chr12	+	21255680	21261656	4	Azgp1	NM_012826	9344.92	10401.4	8288.43	0.796856	-0.327608	0.00418724	0.0543114
chr19	+	52921383	52925934	5	Hp	NM_012582	123797	137714	109880	0.797884	-0.325748	0.00470309	0.0587643
chr2	+	270978810	271014747	8	Uox	NM_053768	6284.08	6988.34	5579.81	0.798446	-0.324733	0.00147462	0.025046
chr3	+	120716980	120746951	9	Sord	NM_017052	873.88	971.694	776.066	0.798673	-0.324323	0.00608357	0.0711285
chr9	-	9331183	9335243	4	Ndufa11	NM_212517	879.37	977.108	781.631	0.799943	-0.322031	0.00885693	0.0933633
chr4	+	144519339	144598645	12	Mpp6	NM_001134982	658.445	731.144	585.747	0.801137	-0.319879	0.00782365	0.0855257
chr3	-	129693707	129704956	9	Ddrgk1	NM_001106512	744.104	825.984	662.224	0.80174	-0.318794	0.00903612	0.0943211
chr6	-	6650365	6664316	3	Cox7a2l	NM_001106704	602.432	668.351	536.513	0.802742	-0.316992	0.00656796	0.0752032
chr1	+	152845254	152875715	8	Bcap31	NM_001004224	1125.74	1247.93	1003.55	0.804171	-0.314427	0.0064248	0.0740749
chr14	-	70145275	70164260	13	Lap3	NM_001011910	1204.51	1334.92	1074.1	0.804619	-0.313623	0.00494815	0.0608531
chr1	-	102559072	102579062	12	Nucb1	NM_053463	2365.37	2619.89	2110.84	0.805699	-0.311687	0.00435814	0.0556051
chr13	-	52430753	52466244	13	C4bpa	NM_012516	9384.88	10394.4	8375.35	0.805754	-0.311588	0.00646438	0.0744446
chr4	-	142140945	142159845	11	Pdia4	NM_053849	4295.87	4753.74	3838.01	0.807366	-0.308705	0.00370116	0.0495481
chr16	-	8888930	8979969	11	Fam35a	NM_001025028	726.682	803.304	650.06	0.809233	-0.305373	0.0087791	0.0928896
chr10	-	40573509	40595261	10	Sparc	NM_012656	1173.81	1297.55	1050.07	0.809269	-0.305308	0.00723728	0.0809819
chr5	-	83093798	83104019	10	Ambp	NM_012901	38294.1	42323.1	34265.2	0.80961	-0.3047	0.00410838	0.0534975
chr1	-	170316040	170346306	8	Dgat2	NM_001012345	3775.79	4171.28	3380.31	0.810377	-0.303335	0.00525979	0.0634826
chr4	-	224839882	224846284	10	Ltbr	NM_001008315	1187.33	1311.23	1063.42	0.811008	-0.302212	0.00936008	0.0962234
chr3	-	87228702	87242228	14	F2	NM_022924	27807.9	30696.4	24919.5	0.811803	-0.300798	0.00812813	0.0879135
chr1	+	172622994	172647499	7	Stard10	NM_001013069	6577.44	7258.19	5896.68	0.812417	-0.299708	0.00624538	0.0727642
chrX	-	64712955	64719477	13	Maged1	NM_053409	882.171	973.392	790.949	0.81257	-0.299435	0.00898371	0.0940953
chr11	+	33982763	33988340	5	Sod1	NM_017050	5442.73	6000.1	4885.36	0.814213	-0.296521	0.00775153	0.0850377
chr7	-	15338345	15349540	12	Cyp4f1	NM_019623	6175.91	6807.91	5543.91	0.814333	-0.296309	0.00748921	0.0830314
chr12	-	25938702	25951655	9	Mdh2	NM_031151	1873.05	2063.91	1682.19	0.815054	-0.295033	0.003002	0.0422379
chr7	-	11180238	11187126	8	Aes	NM_019220	2002.46	2205.66	1799.25	0.815743	-0.293814	0.00664107	0.0756489
chr12	+	41102283	41134468	17	Anapc5	NM_001080147	1053.18	1159.87	946.479	0.816021	-0.293322	0.00767295	0.0845743
chr2	+	75517643	75565566	12	C9	NM_057146	14415	15867.8	12962.3	0.816894	-0.291778	0.00917478	0.0949061
chr1	-	192078544	192114979	14	Nucb2	NM_021663	1053.38	1159.44	947.313	0.817045	-0.291513	0.00887401	0.0933667
chr1	-	271179095	271207752	9	Cpn1	NM_053526	1066.07	1173.35	958.786	0.817134	-0.291355	0.00853946	0.0908823
chr20	+	16016840	16019309	3	Ddt	NM_024131	3521.51	3874.47	3168.55	0.817801	-0.290178	0.00581905	0.0688233
chr10	-	70416901	70421785	4	Ccl9	NM_001012357	5095.37	5604.46	4586.28	0.818327	-0.28925	0.00697868	0.0788858
chr15	+	61001888	61050732	11	Cpb2	NM_053617	5791.06	6369.07	5213.04	0.818493	-0.288958	0.0077534	0.0850377
chr4	-	226954533	226962988	10	Fkbp4	NM_001191863	1705.63	1866.32	1544.94	0.827799	-0.272647	0.00886717	0.0933667
chr5	-	69297184	69312980	9	Aldob	NM_012496	24285.9	26445.4	22126.3	0.83668	-0.257253	0.0073693	0.081954
chr5	+	83293901	83297054	6	Orm1	NM_053288	5883.06	5278.25	6487.88	1.22917	0.297687	0.00383977	0.0505951
chr1	+	226626840	226726329	20	Pc	NM_012744	7204.81	6457.65	7951.96	1.2314	0.300302	0.00662976	0.0756146
chr10	+	13852128	13864076	12	Zfp598	NM_001105770	835.679	748.984	922.374	1.2315	0.300417	0.00887835	0.0933667
chr19	+	65834229	65865945	9	Zfpm1	NM_001242627	623.214	558.127	688.301	1.23323	0.302447	0.00928479	0.0956715
chr8	-	45730365	45863838	40	Arhgef12	NM_001013246	847.88	758.925	936.834	1.23442	0.303835	0.00765239	0.084488
chr20	+	33110492	33116211	4	Tysnd1	NM_001108932	628.743	562.704	694.782	1.23472	0.304185	0.00548381	0.0654999
chr13	-	52865896	52912481	10	Mapkapk2	NM_178102	772.801	689.422	856.181	1.24188	0.312528	0.00754783	0.083542
chr10	+	12948281	12982941	17	Srrm2	NM_001277154	4314.14	3847.57	4780.72	1.24253	0.31328	0.00311466	0.0434699
chr10	+	10350045	10475505	31	Crebbp	NM_133381	584.9	519.83	649.969	1.25035	0.32233	0.00837413	0.0896978
chr2	-	72182691	72346118	10	Ghr	NM_017094	5512.7	4894.2	6131.21	1.25275	0.325098	0.00811784	0.0878738
chr17	+	44000874	44027211	10	Aldh5a1	NM_022851	1186.98	1053.69	1320.27	1.253	0.325385	0.00809158	0.0877325
chr10	-	103882296	103917776	26	Llgl2	NM_001127549	1081.82	957.708	1205.93	1.25919	0.332491	0.00493028	0.0607426
chr4	+	241606528	241650653	9	Etnk1	NM_001107894	594.128	525.355	662.902	1.26182	0.335503	0.0054998	0.065632
chr12	-	15997273	16025704	12	Wipi2	NM_001007615	393.796	348.182	439.411	1.26202	0.33573	0.00577249	0.0683335
chr6	-	111691589	111780260	9	Dcaf5	NM_001100718	426.261	376.771	475.75	1.2627	0.336515	0.0063866	0.0738266
chr3	+	147642885	147716287	29	Xrn2	NM_001108596	404.273	357.273	451.274	1.26311	0.336979	0.00876701	0.0928576
chrX	-	11198747	11212366	15	Ddx3x	NM_001108246	1240.21	1095.83	1384.58	1.2635	0.337424	0.00195241	0.0308345
chr10	+	5776624	5821051	31	Usp7	NM_001024790	570.379	503.936	636.823	1.2637	0.337652	0.00823523	0.0886388
chr4	+	237973380	238356116	33	Pik3c2g	NM_053923	497.355	439.401	555.309	1.26379	0.337754	0.00845186	0.0900944
chr20	-	24842478	24972937	26	Jmjd1c	NM_001191719	651.042	575.139	726.944	1.26395	0.337934	0.00450541	0.0568454
chr3	-	15686794	15728488	14	Ass1	NM_013157	11520.9	10176.7	12865.1	1.26417	0.338189	0.00605262	0.070829
chr8	+	116800145	116821558	9	Slc25a20	NM_053965	2221.11	1959.96	2482.27	1.26649	0.340838	0.00201057	0.0316028
chr6	-	89586785	89633108	20	Sec23a	NM_001105732	593.68	523.636	663.725	1.26753	0.342023	0.00595208	0.0698988
chr3	+	86277503	86317615	18	Fnbp4	NM_001013159	273.721	241.237	306.206	1.26932	0.344052	0.00922512	0.0952044
chr10	+	94158860	94190354	18	Ddx42	NM_001107059	275.448	242.566	308.329	1.27111	0.34609	0.00899013	0.0940953
chr19	+	54224943	54262545	26	Sf3b3	NM_001106187	687.686	605.415	769.958	1.27178	0.346854	0.00334026	0.0459745
chr7	+	30505422	30553762	21	Uhrf1bp1l	NM_001108753	630.137	554.225	706.048	1.27394	0.349294	0.00390191	0.0512613
chr20	+	42813239	42815799	1	Tspyl1	NM_001013033	518.705	456.181	581.229	1.27412	0.3495	0.00473335	0.0589207
chr20	-	7213146	7226658	30	Prrc2a	NM_212462	1316.66	1157.76	1475.56	1.2745	0.349926	0.00541948	0.0648482
chr17	-	391323	412426	6	Fbp1	NM_012558	4427.32	3893.01	4961.63	1.2745	0.349929	0.000622666	0.0133586
chr6	+	2200624	2264457	11	Rmdn2	NM_001037200	640.705	563.26	718.15	1.27499	0.350484	0.0042185	0.054451
chr5	-	74023651	74112802	48	Abca1	NM_178095	988.067	868.292	1107.84	1.27589	0.3515	0.00957622	0.0979903
chr3	+	157278514	157286642	4	Tp53inp2	NM_001270947	4395.61	3861.4	4929.81	1.27669	0.352406	0.00193847	0.0306875
chr13	+	95053334	95099781	14	Dcaf8	NM_001014231	270.876	237.897	303.855	1.27725	0.353044	0.00922169	0.0952044
chr4	-	57272127	57387292	7	Ube2h	NM_001172127	1275.28	1119.66	1430.89	1.27797	0.353851	0.00249742	0.0371038
chr14	-	82962625	82976486	17	Fgfr3	NM_053429	194.9	171.107	218.694	1.27811	0.354011	0.00754005	0.0835254
chr6	-	31789562	31980891	73	Birc6	NM_001170596	1353.22	1187.31	1519.13	1.27947	0.355546	0.000798819	0.0161
chr19	+	10591815	10604728	9	Ciapin1	NM_001007689	325.485	285.577	365.393	1.27949	0.355568	0.00646808	0.0744446
chr10	-	14030532	14031972	1	Fahd1	NM_001024991	503.975	442.041	565.908	1.28022	0.356389	0.00629132	0.0729793
chr19	+	42771955	42796838	18	Abce1	NM_001108446	568.341	497.844	638.837	1.28321	0.359754	0.00402123	0.0526206
chr2	-	173904051	173926434	7	Slc33a1	NM_022252	960.996	841.244	1080.75	1.2847	0.361433	0.0026896	0.0390557
chr5	-	119143619	119167902	8	Cyp2j3	NM_175766	1701.58	1489.52	1913.65	1.28474	0.36148	0.00123192	0.0221112
chr18	+	62201775	62232717	8	Impa2	NM_172224	188.396	164.878	211.913	1.28527	0.362068	0.00865842	0.0918539
chr15	-	3737335	3749886	26	Zswim8	NM_001271275	518.184	452.988	583.38	1.28785	0.364962	0.00255448	0.0376149
chr20	-	20623397	20655917	6	Ipmk	NM_134417	239.834	209.651	270.018	1.28794	0.365066	0.00592069	0.069759
chr7	-	11599410	11612150	3	Zbtb7a	NM_054002	267.732	233.99	301.473	1.2884	0.36558	0.00711586	0.0800825
chr8	-	62183285	62187910	12	Csk	NM_001030039	605.213	528.93	681.496	1.28844	0.36563	0.00206239	0.0322251
chr14	+	2046345	2051632	3	Slc26a1	NM_022287	2096.83	1831.88	2361.78	1.28927	0.36655	0.00136241	0.0236362
chr12	+	53687000	53793498	52	Ep400	NM_001107149	460.768	402.235	519.301	1.29104	0.368532	0.00383361	0.0505951
chr2	-	135636955	135697732	18	Prkci	NM_032059	404.532	353.015	456.049	1.29187	0.369459	0.00554242	0.0659036
chr18	-	60880942	60901877	14	Lman1	NM_053886	928.046	809.483	1046.61	1.29294	0.370652	0.00438198	0.0556854
chr10	+	73945258	73959625	10	Akap1	NM_053665	620.945	541.426	700.464	1.29374	0.371548	0.00260923	0.0383125
chr12	-	48527292	48587142	58	Gcn1l1	NM_001168664	794.325	692.172	896.479	1.29517	0.37314	0.00198925	0.0313419
chr15	-	14450835	14501356	12	Ngly1	NM_001014136	552.15	480.444	623.857	1.2985	0.376847	0.00335496	0.0460234
chr11	+	75823210	76108035	6	Ppp1r2	NM_138823	254.597	221.507	287.687	1.29877	0.377146	0.00477371	0.0593118
chr1	-	135785355	135895466	39	Chd2	NM_001107523	367.404	319.445	415.363	1.30026	0.378806	0.00605088	0.070829
chr20	+	5274289	5278991	8	RT1-S3	NM_001008886	961.598	835.884	1087.31	1.30079	0.379391	0.00130938	0.0229993
chr10	+	70671086	70676956	3	LOC360228	NM_001003706	443.558	385.422	501.695	1.30168	0.380373	0.000929491	0.0182322
chr8	+	116652040	116691239	10	Qrich1	NM_001134532	408.847	355.146	462.549	1.30242	0.381193	0.00419861	0.0543262
chr1	+	115459546	115658973	92	Herc2	NM_001107520	425.908	369.887	481.93	1.30291	0.381738	0.00208003	0.0323604
chrX	+	72390252	72435241	23	Ogt	NM_017107	646.96	561.335	732.585	1.30508	0.384134	0.00116107	0.021227
chr5	+	160146093	160313421	31	Eif4g3	NM_001106693	589.406	511.192	667.62	1.30601	0.385162	0.0040885	0.0532909
chr4	-	184946339	184965637	3	Rab43	NM_001024331	223.201	193.515	252.887	1.30681	0.386047	0.00435258	0.0555875
chr6	-	37285871	37323978	10	Seli	NM_001134754	697.673	604.418	790.927	1.30858	0.387997	0.00153345	0.0258467
chr2	+	159946627	160009197	20	Naa15	NM_001107674	531.398	460.172	602.624	1.30956	0.389084	0.00124406	0.0221574
chr2	+	73882079	73917812	9	Prkaa1	NM_019142	225.476	195.197	255.754	1.31024	0.389827	0.00431779	0.0553561
chr19	+	65917256	65952371	18	Zc3h18	NM_201416	323.802	280.045	367.558	1.3125	0.392315	0.00547202	0.0654179
chr1	-	195338346	195350223	5	Gde1	NM_032615	723.976	625.905	822.048	1.31337	0.393278	0.000620447	0.0133562
chr4	-	27562606	27601351	24	Pex1	NM_001109220	682.181	589.301	775.061	1.31522	0.395307	0.00106947	0.0201486
chr5	-	176665199	176685381	16	Atad3a	NM_001034922	308.275	266.231	350.318	1.31584	0.395987	0.00480413	0.0595228
chr4	-	7120977	7126440	4	Chpf2	NM_001106574	253.482	218.889	288.074	1.31607	0.396237	0.00301944	0.0424383
chr20	+	51789199	51885778	16	Prep	NM_031324	359.275	309.949	408.602	1.31829	0.398666	0.00508429	0.0621818
chr10	+	63024263	63088486	21	Cpd	NM_012836	247.606	213.401	281.81	1.32056	0.401153	0.00382863	0.0505951
chr3	+	134211556	134908321	33	Plcb1	NM_001077641	159.145	137.142	181.148	1.32088	0.4015	0.00815414	0.0880589
chr6	+	145692074	145711786	15	Aspg	NM_144750	1919.24	1652.18	2186.31	1.32329	0.40413	0.00165646	0.0273645
chr18	+	26761211	26818872	15	Apc	NM_012499	231.386	199.188	263.585	1.32329	0.404134	0.0049346	0.0607426
chr10	-	74759411	74765463	4	Srsf1	NM_001109552	918.192	790.322	1046.06	1.32359	0.404457	0.000648478	0.013737
chr2	+	216092640	216149878	23	Arnt	NM_012780	269.971	232.361	307.581	1.32372	0.404599	0.00567553	0.0673658
chr1	+	144345710	144374081	10	Whamm	NM_001130728	295.871	254.512	337.231	1.32501	0.406003	0.00326176	0.0449872
chr14	+	79085066	79096343	2	Tada2b	NM_001170455	372.488	320.379	424.598	1.3253	0.406316	0.00583085	0.0688471
chr1	+	58619222	58683477	34	Chd1	NM_001107465	266.513	229.215	303.811	1.32544	0.406471	0.00238749	0.0359939
chr1	-	18602549	19574958	30	Ptprk	NM_001029902	886.912	762.745	1011.08	1.32558	0.406625	0.00145491	0.0248701
chr5	-	166572595	166798221	70	Vps13d	NM_001108006	896.679	771.02	1022.34	1.32595	0.407031	0.000489911	0.0111997
chr8	-	6134180	6202218	10	Yap1	NM_001034002	274.39	235.902	312.877	1.3263	0.407409	0.00780933	0.0855099
chr20	+	13606331	13651945	32	Trpm2	NM_001011559	467.1	401.51	532.691	1.32672	0.407862	0.00128749	0.0227097
chr10	-	9457240	9492668	18	Ubn1	NM_001106977	661.638	568.688	754.587	1.32689	0.408051	0.000357276	0.00873911
chr7	-	129946571	129973529	41	Sbf1	NM_001271173	782.268	671.977	892.56	1.32826	0.409537	0.000717981	0.0148539
chr19	+	62781489	62797313	5	Mlycd	NM_053477	1407.06	1207.78	1606.34	1.32999	0.411415	0.00129435	0.0227703
chr8	+	114898495	114974112	22	Vprbp	NM_001191798	219.769	188.6	250.938	1.33053	0.412005	0.00342247	0.046579
chr18	+	56116634	56139523	9	Csnk1a1	NM_053615	407.934	350.055	465.813	1.33068	0.412168	0.0026134	0.0383125
chr1	+	272184298	272195785	14	Sema4g	NM_001108526	2579.65	2213.52	2945.78	1.33081	0.412306	0.00074162	0.0152009
chr16	-	81476068	81586090	29	Atp11a	NM_001107324	788.597	676.639	900.556	1.33093	0.41243	0.000838507	0.016798
chr8	-	22148760	22168037	13	Raver1	NM_001013939	163.047	139.878	186.217	1.33128	0.412818	0.00806747	0.0875426
chr7	+	134270161	134361035	10	Pphln1	NM_001108992	235.962	202.371	269.553	1.33197	0.413566	0.00472082	0.0589207
chr9	-	65769812	65841413	34	Als2	NM_001013413	497.986	427.001	568.971	1.33248	0.414114	0.00184557	0.0294626
chrX	+	31520481	31562128	15	Mospd2	NM_001134588	270.136	231.48	308.792	1.33399	0.415747	0.00279075	0.0400955
chr11	-	34717257	34792362	32	Synj1	NM_053476	136.336	116.748	155.924	1.33556	0.417443	0.00856639	0.0910959
chr6	-	144862617	144865631	1	RGD1305743	NM_001108060	117.018	100.197	133.84	1.33577	0.417668	0.00880859	0.0930544
chr10	+	38891467	38898470	9	Irf1	NM_012591	370.297	317.027	423.568	1.33606	0.417988	0.00196826	0.0310481
chr3	-	9217445	9251986	30	Sec16a	NM_001276417	1676.73	1435.1	1918.35	1.33673	0.418709	0.000604454	0.0131397
chr5	-	155884754	155912508	9	Dhdds	NM_001011978	538.16	460.469	615.851	1.33744	0.419479	0.000722145	0.0148937
chr6	-	137672545	137764455	13	Clmn	NM_001106755	516.544	441.961	591.127	1.33751	0.419551	0.00131634	0.023035
chr20	+	10484894	10509126	8	Rnf8	NM_001025727	389.186	332.908	445.464	1.3381	0.420185	0.00219076	0.0336001
chr11	-	54221083	54383336	18	Cblb	NM_133601	134.31	114.829	153.791	1.3393	0.421479	0.00957503	0.0979903
chr6	+	112463007	112498490	9	Slc39a9	NM_001034929	174.282	148.986	199.578	1.33958	0.421779	0.00674682	0.0765908
chr13	-	54863119	54899047	11	Mdm4	NM_001012026	141.911	121.306	162.516	1.33972	0.42193	0.00815483	0.0880589
chr7	+	11200711	11214475	7	Gna11	NM_031033	165.267	141.155	189.378	1.34163	0.423987	0.00785988	0.0857101
chr6	-	3082455	3159445	22	Sos1	NM_001100716	430.581	367.689	493.474	1.3421	0.424488	0.00170612	0.0278729
chr3	-	89626177	89749364	11	Hsd17b12	NM_032066	1138.47	971.522	1305.41	1.34367	0.426183	0.000365453	0.00887377
chr7	+	70870218	70978626	23	R3hdm2	NM_001130557	923.088	787.486	1058.69	1.34439	0.426955	0.00759154	0.0839558
chr5	-	155592618	155635649	19	Arid1a	NM_001106635	695.281	592.907	797.654	1.34533	0.427957	0.000352503	0.00865423
chr3	-	55223297	55269581	16	Ifih1	NM_001109199	189.806	161.788	217.825	1.34636	0.429065	0.00349806	0.0473129
chr11	-	87394893	87645690	30	Yeats2	NM_001109057	232.227	197.898	266.555	1.34693	0.429678	0.0051312	0.0625827
chr12	+	40226382	40332762	25	Clip1	NM_031745	220.25	187.679	252.821	1.34709	0.429848	0.00182546	0.029247
chr2	+	42469964	42545059	16	Dmgdh	NM_139102	2993.77	2550.77	3436.77	1.34735	0.430121	8.84123e-05	0.00289234
chr5	+	4950858	4973622	7	Lactb2	NM_001024247	719.373	612.804	825.943	1.34781	0.430618	0.000720795	0.0148889
chr15	-	41680884	41771826	23	Xpo4	NM_001106042	196.975	167.71	226.24	1.34899	0.431881	0.00434885	0.0555875
chr14	+	87476041	87492529	20	Zmiz2	NM_001100507	730.328	621.678	838.978	1.34954	0.432466	0.00166133	0.027377
chr13	+	30820432	30915037	30	RGD1307235	NM_001134546	258.102	219.645	296.56	1.35018	0.43315	0.00916582	0.0949061
chr1	-	79133678	79158168	13	Gltscr1	NM_001106226	142.8	121.483	164.117	1.35095	0.43397	0.00893924	0.0938584
chr12	-	26476184	26534154	19	Baz1b	NM_001191916	516.487	439.336	593.637	1.35121	0.434257	0.000473695	0.010904
chr1	+	3480827	3514060	8	Lats1	NM_001134543	316.054	268.508	363.601	1.35415	0.437389	0.00419925	0.0543262
chr1	-	9313348	9354376	12	Pex3	NM_031350	179.978	152.901	207.054	1.35417	0.437406	0.00520951	0.0633036
chr1	-	257923299	258182215	10	Sgms1	NM_181386	250.346	212.498	288.194	1.35622	0.439595	0.00292388	0.0414746
chr3	-	8736052	8796109	18	Camsap1	NM_001168549	132.583	112.517	152.648	1.35667	0.440069	0.00639976	0.0739145
chr10	-	86343414	86350554	4	Ormdl3	NM_001047897	400.462	339.803	461.121	1.35702	0.440445	0.000780181	0.0158689
chr16	+	18931533	18944588	18	Cherp	NM_001106064	327.451	277.813	377.088	1.35735	0.440788	0.00189444	0.0300981
chr18	+	3606714	3626295	20	RGD1311805	NM_001009638	284.317	241.028	327.605	1.3592	0.442756	0.0023272	0.0352049
chr5	-	144829587	145151477	98	Macf1	NM_001135758	947.098	802.783	1091.41	1.35954	0.443117	7.2427e-05	0.00243277
chr12	+	42562634	42576553	12	Trafd1	NM_053760	354.056	299.933	408.179	1.3609	0.44456	0.000551859	0.0123605
chr6	+	117425814	117455732	15	Entpd5	NM_199394	448.332	379.572	517.092	1.3623	0.446048	0.000562808	0.0125423
chr17	-	12613752	12653474	12	Faf2	NM_001017445	309.745	262.157	357.333	1.36305	0.446838	0.000978038	0.0189363
chr7	+	35536670	35608377	4	Tmcc3	NM_001108084	342.535	289.905	395.165	1.36309	0.446879	0.00303951	0.0425852
chr17	+	65007057	65085258	19	Larp4b	NM_001107361	685.01	579.62	790.399	1.36365	0.447475	0.00024045	0.00641485
chr16	-	70791572	70897651	23	Whsc1l1	NM_001106090	207.462	175.532	239.393	1.36381	0.447647	0.00177018	0.0286028
chr6	-	1506912	1524597	16	Cebpz	NM_001108701	306.634	259.163	354.104	1.36634	0.450317	0.00141232	0.0243301
chr17	-	19600216	19782859	37	Kif13a	NM_001107462	244.094	206.277	281.911	1.36666	0.450658	0.00165963	0.027377
chr14	+	19224895	19337848	31	Ankrd17	NM_001105999	708.296	598.445	818.148	1.36712	0.451142	0.000230865	0.00623585
chr1	+	185007567	185105413	21	Arntl	NM_024362	372.07	314.328	429.812	1.3674	0.451432	0.00121779	0.0218873
chr2	+	225878014	225916841	18	Phtf1	NM_001191102	269.373	227.45	311.295	1.36863	0.452731	0.00115752	0.021227
chr14	-	37612583	37681311	9	Slain2	NM_001107214	255.792	215.958	295.626	1.3689	0.453019	0.00268401	0.0390557
chr13	-	112063806	112101984	18	Kctd3	NM_001107199	175.524	148.144	202.905	1.36965	0.453806	0.00668898	0.0760643
chr7	-	120754841	120758011	2	Ddx17	NM_001015018	952.524	803.842	1101.21	1.36993	0.454101	0.000134156	0.00405892
chr4	+	65977907	66044679	18	Ubn2	NM_001134553	216.537	182.653	250.421	1.37102	0.455246	0.00107383	0.020202
chr7	+	13011141	13021357	21	Polrmt	NM_001106766	304.847	256.827	352.867	1.37395	0.458331	0.00224149	0.0341808
chr6	-	132416693	132806362	7	Foxn3	NM_001108047	443.725	373.657	513.794	1.37504	0.459475	0.000724051	0.0149098
chr5	+	159968603	160068655	19	Ece1	NM_053596	1013.24	853.151	1173.33	1.37529	0.459741	6.76859e-05	0.00229924
chr20	+	5398412	5404790	4	Prr3	NM_212544	182.59	153.733	211.446	1.37541	0.45986	0.0046024	0.0576689
chr7	-	123655989	123753836	5	Tcf20	NM_001130574	217.912	183.443	252.381	1.3758	0.460271	0.00230186	0.03487
chr1	+	48334821	48430485	14	Tulp4	NM_001109137	121.033	101.847	140.219	1.37676	0.46128	0.00379224	0.050419
chr5	-	66739649	66785992	11	Tbc1d2	NM_001107933	313.341	263.648	363.034	1.37696	0.461491	0.00141669	0.0243737
chr17	+	57844088	57856503	8	Trim27	NM_001134974	183.002	153.935	212.068	1.37764	0.462202	0.00249149	0.0370986
chr10	+	56257733	56269348	29	Neurl4	NM_001107013	440.112	370.1	510.125	1.37834	0.462934	0.000217767	0.00595081
chr14	-	81796507	81942093	67	Htt	NM_024357	286.287	240.717	331.857	1.37862	0.463221	0.00171323	0.0279404
chr11	+	76151875	76262554	23	Acap2	NM_001034006	108.74	91.4284	126.051	1.37869	0.463293	0.00903984	0.0943211
chr16	+	59982384	60002474	7	Eri1	NM_001014143	138.672	116.579	160.765	1.37902	0.463645	0.00574092	0.0680205
chr18	+	59595642	59921504	32	Nedd4l	NM_001008300	634.785	533.412	736.158	1.38009	0.464766	0.000125994	0.0038648
chr10	+	66710424	66759039	17	Sez6	NM_001105754	648.39	544.833	751.946	1.38014	0.464816	0.000863123	0.0171486
chr10	+	67216681	67297282	19	Rhot1	NM_001107026	226.585	190.013	263.157	1.38494	0.469822	0.00134205	0.0233924
chr6	+	106242729	106287704	16	Hif1a	NM_024359	531.826	445.88	617.771	1.38551	0.470419	0.000284015	0.0072544
chr16	+	17421545	17478815	9	Tspan14	NM_001169127	429.784	360.284	499.284	1.3858	0.470724	0.000548411	0.0123041
chr4	-	66255896	66435382	15	Hipk2	NM_001108622	601.33	504.052	698.607	1.38598	0.470907	0.000101296	0.00320335
chr12	-	54212227	54242961	13	Ankle2	NM_001047901	208.615	174.827	242.403	1.38653	0.471481	0.0021198	0.0327767
chr1	+	207214642	207257112	19	Sec23ip	NM_001134859	237.309	198.873	275.745	1.38654	0.471486	0.00123983	0.0221574
chr14	-	32863626	32901277	25	Polr2b	NM_001106002	628.524	526.65	730.398	1.38687	0.471837	0.000230992	0.00623585
chr7	+	121451109	121463407	6	Smcr7l	NM_001007709	232.701	194.961	270.441	1.38715	0.472127	0.00179233	0.0288905
chr7	+	11658215	11666650	10	Creb3l3	NM_001012115	6062.71	5078.9	7046.52	1.38741	0.472394	1.06285e-05	0.000486787
chr13	-	79201815	79251753	8	Fam20b	NM_001107187	406.697	340.624	472.769	1.38795	0.472955	0.000365383	0.00887377
chr1	-	224501042	224577428	26	Ppfia1	NM_001106320	154.586	129.469	179.702	1.38799	0.472999	0.00317697	0.0440925
chr10	-	106927770	106959353	21	Usp36	NM_001107069	183.951	154.053	213.849	1.38815	0.473162	0.00451611	0.0569098
chr20	-	15036955	15075014	28	Mcm3ap	NM_001106382	239.695	200.685	278.705	1.38877	0.473805	0.00184015	0.0294114
chr3	-	152738537	152758056	8	Apmap	NM_001034003	1506.71	1261.19	1752.24	1.38935	0.474414	9.84798e-05	0.00313671
chr10	-	43347903	43392988	28	Gemin5	NM_001172089	122.841	102.775	142.906	1.39048	0.475582	0.00552749	0.065785
chr6	+	135842579	135862543	11	Ubr7	NM_001007705	287.11	240.143	334.077	1.39116	0.476287	0.000627351	0.0134083
chr9	+	113066546	113105528	18	Ppp4r1	NM_080907	373.097	311.973	434.221	1.39185	0.477008	0.000205488	0.00565072
chr18	-	40147976	40173809	4	Fem1c	NM_001106932	276.775	231.342	322.208	1.39278	0.477968	0.000748684	0.0152985
chr1	+	160681964	160761651	20	Picalm	NM_053554	794.516	663.877	925.155	1.39356	0.478779	0.000117473	0.00364829
chr10	+	66129655	66166766	37	Supt6h	NM_001191820	684.07	571.474	796.667	1.39406	0.479289	7.64585e-05	0.00255156
chr4	-	39840550	39868490	6	Tmem168	NM_001014054	364.035	304.031	424.038	1.39472	0.479974	0.000380329	0.00911828
chr8	+	57745462	57764761	12	Idh3a	NM_053638	212.729	177.525	247.933	1.39661	0.48193	0.00202657	0.0317792
chr10	+	66762562	66810434	15	Phf12	NM_001013117	244.448	203.855	285.04	1.39825	0.48362	0.00129424	0.0227703
chr4	-	220573990	220720680	33	Mical3	NM_001191085	247.128	205.859	288.397	1.40094	0.486399	0.00105779	0.0200137
chr14	+	33371453	33405832	11	Ppat	NM_057198	236.479	196.953	276.005	1.40137	0.486841	0.000963905	0.0187146
chr7	+	2496856	2528058	33	Baz2a	NM_001107158	347.512	289.282	405.742	1.40258	0.488084	0.00012792	0.00390054
chr3	+	14281317	14303963	15	Fam73b	NM_001106566	181.312	150.897	211.727	1.40312	0.48864	0.00583661	0.0688471
chr1	+	159893039	159901945	2	Fzd4	NM_022623	574.489	477.889	671.089	1.40428	0.489828	5.78051e-05	0.0019942
chr1	-	138329798	138354991	3	Klhl25	NM_001039006	415.477	345.573	485.38	1.40457	0.490126	0.000276376	0.00712783
chr14	+	14051458	14068709	7	Paqr3	NM_001012033	214.393	178.304	250.482	1.4048	0.490368	0.00172961	0.0281528
chr10	-	64152532	64175333	3	Crk	NM_019302	192.453	159.972	224.933	1.40608	0.491674	0.00283264	0.0405858
chr1	+	141965575	142049687	11	Abhd2	NM_001106275	3008.42	2499.14	3517.7	1.40756	0.493198	0.00213152	0.0328432
chr3	+	16741001	16758088	18	Ciz1	NM_001106568	148.472	123.265	173.68	1.409	0.494671	0.00521413	0.0633036
chr10	-	13267427	13330741	14	Pdpk1	NM_031081	125.248	103.963	146.534	1.40949	0.495169	0.00422683	0.0545056
chr2	+	77621903	77678206	18	Lmbrd2	NM_001109177	152.961	126.964	178.958	1.40952	0.495201	0.00491324	0.0606483
chr14	-	77384813	77475005	11	Stx18	NM_001012151	188.754	156.471	221.038	1.41264	0.498394	0.00262885	0.0384594
chr13	-	40792727	40972784	28	Ptpn4	NM_001100479	132.049	109.445	154.653	1.41307	0.498835	0.00212409	0.0328048
chr14	+	36514022	36582331	9	Usp46	NM_001191596	207.21	171.699	242.721	1.41364	0.499415	0.00162401	0.0269964
chr17	+	65192672	65573071	38	Dip2c	NM_001107360	123.579	102.363	144.795	1.41453	0.500325	0.00380113	0.0504361
chr8	-	127127109	127216712	18	Oxsr1	NM_001108194	240.917	199.481	282.354	1.41544	0.501252	0.000558442	0.0124659
chr6	-	118326275	118361124	10	Psen1	NM_019163	203.264	168.279	238.249	1.4158	0.50162	0.000632079	0.0134324
chr1	-	9445187	9665235	6	Aig1	NM_001134425	78.551	65.0201	92.0819	1.41621	0.502032	0.00911885	0.0946963
chr20	-	3917780	3919728	2	Ubd	NM_053299	239.325	198.068	280.581	1.41659	0.502424	0.00182294	0.0292419
chr8	+	32555211	32586755	26	Nfrkb	NM_001108133	249.746	206.652	292.841	1.41707	0.502909	0.000416759	0.00976259
chr5	+	169573103	169586003	5	Dffa	NM_053679	116.283	96.1961	136.369	1.41762	0.50347	0.00262921	0.0384594
chr1	-	8098758	8608676	75	Utrn	NM_013070	396.498	327.982	465.013	1.4178	0.503654	0.000149445	0.00441094
chr12	-	46786482	46819404	11	Vsig10	NM_001271336	175.078	144.798	205.357	1.41823	0.504092	0.00350683	0.0473504
chr15	-	16953274	17647626	32	Ptprg	NM_134356	274.774	227.155	322.393	1.41926	0.505142	0.000321044	0.00795542
chr3	+	14334895	14365358	10	Ppp2r4	NM_001108577	931.645	770.189	1093.1	1.41926	0.505143	1.80629e-05	0.00076405
chr10	-	56578677	56583601	9	Bcl6b	NM_001108279	172.972	142.985	202.959	1.41944	0.505323	0.00148429	0.0251321
chr7	-	30104959	30260754	10	Nr1h4	NM_021745	833.916	689.294	978.537	1.41962	0.505508	5.80859e-05	0.0019987
chr10	-	36913610	36988825	24	Sec24a	NM_001105780	1038.59	858.448	1218.74	1.4197	0.505582	0.00127099	0.0225005
chr7	-	130089652	130093008	11	Chkb	NM_017177	254.837	210.541	299.134	1.42079	0.506693	0.000410919	0.00972874
chr2	-	202912658	202990882	9	Arfip1	NM_021763	116.87	96.5549	137.185	1.4208	0.506707	0.00527581	0.0635526
chr10	-	73600908	73685836	29	Med13	NM_001107035	505.666	417.519	593.812	1.42224	0.508164	3.6013e-05	0.00138323
chr8	+	48766004	48788272	9	Bace1	NM_019204	91.2871	75.3576	107.217	1.42277	0.508702	0.00712072	0.0800825
chr11	+	91755138	91851321	16	Fgd4	NM_139263	119.239	98.4105	140.067	1.42329	0.509231	0.00840485	0.0898095
chrX	+	12446666	12488776	15	Bcor	NM_001191586	225.391	186.009	264.773	1.42344	0.509385	0.00109291	0.0203306
chr13	+	74110015	74168822	21	Edem3	NM_001191671	364.547	300.769	428.325	1.4241	0.510051	0.000142168	0.00425287
chr5	-	80811876	80893823	14	Ptbp3	NM_031346	222.771	183.745	261.798	1.42479	0.510746	0.00353539	0.0475755
chr10	+	361894	394582	8	Bfar	NM_001013125	365.886	301.749	430.023	1.4251	0.511063	0.000105085	0.00330744
chr5	+	154501298	154581358	18	Eya3	NM_001107910	243.538	200.686	286.39	1.42706	0.513042	0.000614826	0.0132999
chr2	+	208485293	208506087	15	Adar	NM_031006	340.495	280.493	400.498	1.42784	0.513831	0.00128276	0.0226563
chr8	-	107148283	107243975	22	Armc8	NM_001173354	154.022	126.859	181.186	1.42824	0.514238	0.00125203	0.0222617
chr1	-	8958290	8971014	11	Ltv1	NM_001014157	102.859	84.6835	121.034	1.42925	0.515257	0.00652723	0.0748659
chr3	+	33622182	33770772	14	Kynu	NM_053902	3749.84	3084.24	4415.44	1.43161	0.517642	3.57858e-06	0.000183516
chr15	+	28019021	28041287	4	Mapk1ip1l	NM_001108373	130.924	107.679	154.17	1.43175	0.517779	0.00523818	0.0633639
chr2	+	173939843	173974539	16	Gmps	NM_001024754	322.274	264.981	379.567	1.43243	0.518462	7.68826e-05	0.00255929
chr6	-	34996982	35059195	36	Xdh	NM_017154	1459.65	1199.98	1719.32	1.43278	0.518821	2.60497e-06	0.000140647
chr1	-	260338635	260404074	7	Pank1	NM_001106373	2410.19	1981.32	2839.05	1.4329	0.518942	1.15048e-05	0.000521523
chr20	+	13338327	13398196	23	Trappc10	NM_001173528	394.942	324.38	465.503	1.43505	0.521106	0.000128666	0.00390354
chr4	+	164601147	164665022	35	Polr1a	NM_031772	189.849	155.853	223.844	1.43625	0.522309	0.00116188	0.021227
chr17	+	32456607	32473005	10	Eci2	NM_001006966	1304.28	1070.55	1538	1.43664	0.522694	3.24084e-06	0.00016749
chr15	+	36960281	36969506	10	Mmp14	NM_031056	777.767	638.03	917.504	1.43803	0.52409	6.99031e-06	0.000335182
chr12	-	42253695	42285637	10	Brap	NM_001271194	294.196	241.007	347.385	1.44139	0.527459	0.00046926	0.0108207
chr18	+	36491822	36552727	22	Tcerg1	NM_001107390	156.424	128.14	184.708	1.44145	0.52752	0.00162796	0.0270015
chr2	+	276102475	276125397	20	Fubp1	NM_001037653	136.33	111.666	160.994	1.44175	0.527817	0.00292589	0.0414746
chr5	+	14031257	14057899	3	Vcpip1	NM_176857	324.661	265.91	383.412	1.44189	0.527958	0.00221447	0.0338772
chr6	+	117858476	117899444	13	RGD1306119	NM_001169116	117.781	96.3994	139.162	1.4436	0.529672	0.00245188	0.0367602
chr2	-	246053112	246141055	16	Fnbp1l	NM_001039609	88.9235	72.7781	105.069	1.44369	0.52976	0.00490041	0.0605834
chr1	-	115354414	115378274	7	Nipa2	NM_001107518	190.972	156.286	225.658	1.44388	0.529955	0.000572581	0.0127174
chr10	+	46791501	46798641	2	Smcr8	NM_001191919	139.036	113.754	164.318	1.4445	0.530574	0.00103597	0.0197698
chr2	+	73494909	73562334	16	C6	NM_176074	4146.08	3392.06	4900.1	1.44458	0.530648	2.81265e-05	0.00112185
chr15	+	51779296	51936975	38	Kif13b	NM_213626	292.342	239.066	345.618	1.4457	0.531772	0.000177786	0.00499228
chr3	-	26866071	26915899	22	Rc3h2	NM_001107839	85.3442	69.7783	100.91	1.44615	0.532219	0.00893461	0.0938584
chr5	+	163382898	163441506	10	Fbxo42	NM_001108691	78.3231	64.0293	92.6169	1.44648	0.532543	0.00771743	0.0849283
chr18	+	70530558	70558927	4	Smad7	NM_030858	146.121	119.333	172.91	1.44897	0.535026	0.00179548	0.0289062
chr7	-	53664300	53726422	17	Zdhhc17	NM_001039340	90.8877	74.2072	107.568	1.44957	0.535621	0.00407325	0.0531443
chr5	-	65047762	65067167	2	Zbtb5	NM_001106657	138.177	112.763	163.592	1.45077	0.536815	0.00119234	0.0216053
chr4	-	217329777	217343944	7	Adipor2	NM_001037979	826.4	674.221	978.579	1.45142	0.537466	0.00662331	0.0756146
chr2	+	170175584	170287163	8	Mbnl1	NM_001191566	180.168	146.964	213.372	1.45186	0.537905	0.000631079	0.0134324
chr5	+	10456312	10531652	20	Ncoa2	NM_031822	363.13	296.139	430.121	1.45243	0.538469	4.98031e-05	0.00179264
chr6	-	134956634	135024177	22	Trip11	NM_001191772	236.061	192.473	279.649	1.45293	0.538967	0.000237064	0.00634815
chr1	+	6891252	6965113	31	Shprh	NM_001107470	136.509	111.299	161.718	1.453	0.539036	0.00228038	0.0346545
chr3	-	100298715	100338733	28	Nat10	NM_001107756	106.433	86.6566	126.209	1.45642	0.542431	0.00298701	0.0420716
chr8	+	118865642	118872586	2	Epm2aip1	NM_001271384	491.774	400.369	583.178	1.4566	0.542604	1.42646e-05	0.000629444
chr1	+	263055332	263130789	38	Btaf1	NM_001191917	334.82	272.521	397.118	1.4572	0.543199	0.000163656	0.00469476
chr15	-	3433520	3522277	21	Vcl	NM_001107248	428.414	348.639	508.188	1.45763	0.543629	3.96219e-05	0.00149081
chr14	-	84262199	84330159	16	Limk2	NM_024135	170.031	138.327	201.735	1.4584	0.544384	0.000263895	0.00691397
chr15	-	58804730	59000825	27	Rb1	NM_017045	162.382	132.103	192.661	1.45841	0.5444	0.000504839	0.011423
chr3	+	16351778	16423232	29	Nup214	NM_001168559	164.771	133.982	195.561	1.45961	0.545586	0.000584503	0.0129032
chr3	-	131132123	131224768	16	Slc23a2	NM_017316	150.583	122.419	178.747	1.46012	0.546089	0.000655733	0.0138245
chr5	+	161587917	161695703	106	Ubr4	NM_001039026	1546.93	1257.14	1836.72	1.46103	0.546983	9.43453e-07	5.91082e-05
chr15	-	22716609	22849363	45	Flnb	NM_001107288	238.567	193.813	283.321	1.46183	0.547776	0.000127976	0.00390054
chr16	+	36982023	37001397	11	Cep44	NM_001037181	88.6664	72.017	105.316	1.46237	0.548313	0.00405408	0.0529461
chr20	+	46401897	46445446	9	Traf3ip2	NM_001044248	101.076	82.0902	120.062	1.46257	0.548501	0.00270983	0.0392479
chr3	-	128358263	128382727	16	Polr1b	NM_031773	150.863	122.518	179.207	1.4627	0.54863	0.000297482	0.00749745
chr2	-	207174511	207189211	4	Slc25a44	NM_001108947	338.826	275.104	402.547	1.46325	0.54918	0.00188323	0.0299557
chr2	-	215994294	216025557	22	Setdb1	NM_001271175	424.91	344.883	504.938	1.46409	0.550001	4.51649e-05	0.001664
chr14	-	5077922	5093047	2	Lrrc8d	NM_001008338	494.096	400.975	587.217	1.46447	0.550382	0.000156834	0.00455815
chr10	-	91645984	91773271	21	Nsf	NM_021748	126.772	102.863	150.682	1.46487	0.550775	0.00183054	0.029293
chr1	+	82716409	82731463	7	Ethe1	NM_001106234	819.101	664.472	973.73	1.46542	0.551314	4.25966e-06	0.000214306
chr5	+	142408835	142478023	12	Foxj3	NM_001107971	128.712	104.374	153.05	1.46636	0.552236	0.00120806	0.0218306
chr10	+	43424596	43432495	4	Igtp	NM_001008765	626.35	507.546	745.155	1.46815	0.554003	2.92641e-06	0.000153026
chr8	-	47259700	47269967	14	C2cd2l	NM_001011996	404.08	327.392	480.769	1.46848	0.554325	0.000165124	0.00469632
chr19	+	49952332	49980522	17	Cirh1a	NM_001009640	115.818	93.8332	137.803	1.4686	0.55444	0.00272866	0.0393935
chr3	-	100343083	100374879	19	Caprin1	NM_001012185	1212.93	982.618	1443.24	1.46877	0.554611	2.24713e-06	0.000122825
chr8	+	58039174	58083277	22	Ireb2	NM_022863	683.41	553.077	813.743	1.4713	0.557092	0.000991689	0.0190893
chr15	+	58850069	58851879	1	Lpar6	NM_001045843	210.337	170.219	250.454	1.47136	0.557153	0.00108779	0.0203306
chr9	+	45590020	45769792	21	Npas2	NM_001108214	262.376	212.333	312.418	1.47136	0.557154	0.00207801	0.0323604
chr6	+	135081851	135109466	15	Cpsf2	NM_001106753	319.097	258.125	380.069	1.47242	0.55819	2.84733e-05	0.00113228
chr13	+	95281186	95284884	1	Pigm	NM_024144	253.078	204.692	301.465	1.47277	0.558536	0.000496121	0.011276
chr10	+	58739787	58749744	25	Mybbp1a	NM_031668	373.541	301.969	445.113	1.47404	0.559772	2.63211e-05	0.00106585
chr10	+	81746515	81748551	1	Tob1	NM_133317	697.248	563.323	831.172	1.47548	0.561184	1.82957e-06	0.000105197
chr1	-	194724267	194733783	6	Arl6ip1	NM_198737	845.773	682.916	1008.63	1.47694	0.562616	2.76816e-06	0.000147067
chr4	-	197177355	197228556	4	Rybp	NM_001107879	234.36	189.183	279.537	1.4776	0.563258	0.000137149	0.00413064
chr5	+	40573110	40639486	19	Usp45	NM_001107918	70.0667	56.5586	83.5749	1.47767	0.563322	0.00714544	0.0802925
chr1	+	92984819	93090727	29	Ankrd27	NM_001271264	669.471	540.352	798.59	1.47791	0.563556	7.39862e-06	0.00034971
chr20	+	7152999	7168193	20	Abhd16a	NM_212531	292.24	235.8	348.681	1.47871	0.564343	4.82225e-05	0.0017485
chr15	-	23585170	23620355	16	Ero1l	NM_138528	154.212	124.411	184.014	1.47908	0.564703	0.00225156	0.034295
chr5	-	4914569	4943947	4	Xkr9	NM_001012229	160.779	129.671	191.888	1.47981	0.565408	0.000382046	0.00914294
chr7	+	41342267	41344805	1	Galnt4	NM_001025053	124.701	100.549	148.854	1.48042	0.566005	0.00156366	0.0262894
chr15	-	111337692	111600206	53	Dock9	NM_001105759	235.701	189.905	281.497	1.4823	0.567839	0.000118611	0.0036637
chr1	-	271293821	271329346	21	Chuk	NM_001107588	727.65	585.894	869.406	1.4839	0.56939	2.4244e-06	0.000131432
chr3	+	166652144	166731210	11	Stk4	NM_001107800	338.237	271.886	404.587	1.48808	0.573451	5.13494e-05	0.00182848
chr5	-	154351304	154370252	10	Sesn2	NM_001109358	383.207	307.951	458.462	1.48875	0.574101	0.00146451	0.0249701
chr12	-	1007826	1174378	14	Stard13	NM_001109060	647.916	520.669	775.163	1.48878	0.574133	1.53976e-05	0.000672732
chr4	+	221588865	221648218	36	A1i3	NM_001037975	9380.05	7537.36	11222.7	1.48895	0.574294	2.09634e-06	0.0001165
chr1	-	270691423	270714958	9	Got1	NM_012571	3436.93	2760.95	4112.9	1.48967	0.574992	5.44295e-05	0.00190747
chr5	-	157444416	157476909	17	Srrm1	NM_001107986	296.928	238.45	355.407	1.49049	0.575788	5.05904e-05	0.00181606
chr4	-	232477065	232579512	20	Lrp6	NM_001107892	642.977	516.307	769.647	1.49068	0.575968	4.93775e-05	0.00178215
chr7	-	117663812	117667986	12	Slc39a4	NM_001077669	769.027	617.353	920.702	1.49137	0.57664	0.00731658	0.0816628
chr14	+	2612361	2623812	4	Tmed5	NM_001007619	357.693	287.127	428.259	1.49153	0.576797	9.93211e-05	0.00315594
chr2	-	185045502	185101032	17	Kpna4	NM_001014793	103.899	83.3666	124.431	1.49258	0.577809	0.00104311	0.0198329
chr6	+	82918711	82926533	2	Arhgap5	NM_001047869	270.117	216.57	323.665	1.49451	0.579671	0.000294507	0.00745075
chr10	+	70045720	70069233	6	Slfn3	NM_053687	401.586	321.952	481.22	1.49469	0.579851	0.00551461	0.0657441
chr4	+	239043564	239094663	8	Aebp2	NM_001106626	83.1207	66.6275	99.6139	1.49509	0.580229	0.00568549	0.0674238
chr17	+	33132226	33298109	11	Slc22a23	NM_022624	1883.55	1509.42	2257.68	1.49573	0.580852	7.09395e-07	4.59618e-05
chr8	-	116334175	116346857	2	Dag1	NM_053697	1217.37	975.395	1459.34	1.49616	0.581262	6.81652e-07	4.45995e-05
chr17	+	43932172	43950097	11	Mrs2	NM_024001	91.4953	73.2482	109.742	1.49823	0.583256	0.00592442	0.069759
chr19	-	52384703	52398149	5	Zfp612	NM_001107428	199.74	159.845	239.636	1.49918	0.584174	0.000121535	0.00374529
chr13	+	117922568	118118393	32	Plxna2	NM_001105988	771.109	616.908	925.31	1.49992	0.584881	0.00313727	0.0436852
chr10	-	35498265	35500221	5	Ltc4s	NM_053639	107.254	85.804	128.704	1.49998	0.584943	0.000672976	0.0140985
chr10	-	47300330	47320877	10	Aldh3a2	NM_031731	6029.07	4818.15	7239.99	1.50265	0.587508	3.40158e-07	2.42902e-05
chr8	+	117305956	117324041	15	Cdc25a	NM_133571	74.7203	59.6843	89.7564	1.50385	0.588663	0.00356197	0.0478847
chr3	+	129934529	130067265	29	Atrn	NM_031351	4815.55	3846.46	5784.63	1.50388	0.588693	2.39488e-07	1.78672e-05
chr3	-	169948329	170007642	17	Znfx1	NM_001047860	274.327	219.116	329.539	1.50395	0.588757	8.74642e-05	0.00287549
chr12	-	32675286	32745272	18	Sfswap	NM_001034924	155.398	124.102	186.693	1.50435	0.589139	0.000272637	0.00708253
chr3	-	35063908	35185403	9	Zeb2	NM_001033701	107.195	85.5809	128.809	1.50512	0.589876	0.000949084	0.0185106
chr6	+	60701427	60713132	4	Klf11	NM_001037354	163.489	130.48	196.497	1.50595	0.590677	0.000146131	0.00432275
chr1	+	106163843	106250502	16	Prmt3	NM_053557	108.495	86.5812	130.408	1.5062	0.590909	0.00663236	0.0756146
chr10	+	103604136	103609671	6	Trim65	NM_001135714	174.213	139.016	209.41	1.50637	0.591078	6.35051e-05	0.00216831
chr4	-	219179491	219465108	19	Erc1	NM_170788	158.311	126.31	190.313	1.50672	0.591408	0.000329532	0.00815055
chr12	-	42495119	42547489	24	Naa25	NM_001047900	111.862	89.2395	134.485	1.50702	0.591694	0.000622696	0.0133586
chr1	-	287818524	287876134	5	Pdzd8	NM_001107446	367.882	293.179	442.584	1.5096	0.594168	7.14488e-06	0.000340137
chr19	+	66954014	66969855	12	Def8	NM_001024774	450.826	359.134	542.517	1.51063	0.595146	4.56467e-06	0.000228331
chr17	+	78890309	78911578	20	Mcm10	NM_001107366	74.3457	59.1844	89.5069	1.51234	0.596781	0.00583393	0.0688471
chr5	+	146503105	146566949	24	Inpp5b	NM_001100755	103.141	82.0502	124.232	1.5141	0.598456	0.00303296	0.0425383
chr2	-	138381016	138411897	6	Zmat3	NM_022548	65.4267	52.0116	78.8419	1.51585	0.600131	0.00943738	0.0967933
chr6	-	33299539	33339177	19	Wdr43	NM_001037791	273.533	217.442	329.624	1.51592	0.600192	0.000401337	0.00957013
chr14	+	16980269	17031712	12	Scarb2	NM_054001	405.915	322.602	489.228	1.51651	0.600753	7.49802e-06	0.000353151
chr4	-	2172458	2330391	17	Lmbr1	NM_001191858	88.1026	69.9943	106.211	1.51742	0.601623	0.00136315	0.0236362
chr3	+	12402367	12407371	5	Mrps2	NM_001108576	186.762	148.36	225.165	1.5177	0.601887	0.00017222	0.00485653
chr5	-	163735388	163790132	15	LOC690911	NM_001271495	373.801	296.812	450.79	1.51877	0.602906	5.85252e-06	0.000285784
chr7	-	63912372	63951227	18	Xpot	NM_001108102	404.379	320.975	487.783	1.51969	0.60378	0.00127224	0.0225005
chr2	+	46477804	46582435	18	Col4a3bp	NM_001108935	576.975	457.914	696.037	1.52002	0.604087	2.12985e-06	0.000117869
chr11	+	81026493	81519791	12	Lpp	NM_001013864	66.0582	52.4068	79.7096	1.52098	0.605	0.00837165	0.0896978
chr11	-	18314225	18397564	4	Nrip1	NM_001100560	294.857	233.876	355.838	1.52148	0.605477	1.6844e-05	0.000721686
chr19	-	66737482	66741950	2	Spata2L	NM_001109133	71.13	56.4113	85.8487	1.52183	0.60581	0.0086382	0.0917127
chr15	-	2670858	2712120	6	Samd8	NM_001012040	60.783	48.197	73.369	1.52227	0.606228	0.00490341	0.0605834
chr2	-	48110536	48211938	26	Fcho2	NM_001191632	212.786	168.656	256.916	1.52331	0.607208	2.68851e-05	0.00108537
chr17	+	78842453	78884159	16	Optn	NM_145081	1182.09	936.647	1427.54	1.5241	0.607956	2.72206e-07	1.99748e-05
chr5	-	61033070	61080788	16	Ddx58	NM_001106645	1024.57	811.794	1237.35	1.52421	0.608065	5.75363e-05	0.0019901
chr14	-	20870120	20902822	6	Mob1b	NM_001108357	134.995	106.91	163.081	1.52541	0.609198	0.00026392	0.00691397
chr1	+	250540558	250659565	13	Kank1	NM_001037197	523.774	414.708	632.84	1.52599	0.609744	2.28478e-06	0.000124371
chr13	+	108069777	108080242	4	Slc30a10	NM_001105985	472.823	374.185	571.461	1.52721	0.610902	1.84419e-06	0.00010558
chr5	-	145205744	145221146	5	Akirin1	NM_001030054	103.238	81.694	124.782	1.52743	0.611104	0.000556317	0.0124394
chr10	-	94340404	94400743	22	Ern1	NM_001191926	282.395	223.446	341.344	1.52764	0.611303	0.00806182	0.0875426
chr8	-	60482443	60492005	3	RGD1305464	NM_001025011	206.448	163.326	249.57	1.52805	0.61169	0.000272593	0.00708253
chr6	-	36603421	36608410	9	Abhd1	NM_001008520	546.116	431.729	660.503	1.5299	0.613439	0.0001157	0.00361582
chr2	+	219928568	219954863	10	Hmgcs2	NM_173094	27482.8	21726.3	33239.4	1.52992	0.613455	4.69015e-08	4.32601e-06
chr10	+	46266252	46326609	6	Rai1	NM_001271207	139.203	110.011	168.396	1.53073	0.614218	0.000374501	0.00902745
chr19	-	68206947	68219533	2	Fam89a	NM_001011711	328.429	259.534	397.324	1.53091	0.614393	1.49391e-06	8.81869e-05
chr16	-	19767917	19780232	6	Plvap	NM_020086	104.896	82.8297	126.963	1.53282	0.616185	0.000402331	0.00957664
chr2	+	270790450	270822035	15	Ssx2ip	NM_175597	163.112	128.797	197.428	1.53287	0.616234	0.000128727	0.00390354
chr5	-	33018927	33034090	7	Otud6b	NM_001106639	58.2786	46.0173	70.5399	1.5329	0.616264	0.00383841	0.0505951
chr7	-	71018807	71099367	89	Lrp1	NM_001130490	10969	8660.27	13277.8	1.53319	0.616533	1.30657e-08	1.4342e-06
chr9	+	66371990	66479596	13	Bmpr2	NM_080407	125.001	98.6695	151.332	1.53372	0.617037	0.000623573	0.0133586
chr6	+	116889270	116917829	19	Arel1	NM_001106744	207.149	163.511	250.787	1.53377	0.61708	5.68472e-05	0.00197139
chr8	+	84825601	84851400	7	Elovl5	NM_134382	2412.05	1903.28	2920.82	1.53462	0.617884	0.00110244	0.0204102
chr2	-	226353984	226419472	18	Lrig2	NM_001107710	127.694	100.684	154.703	1.53652	0.619669	0.000205014	0.00564937
chr2	+	215986083	215994342	11	Cers2	NM_001033700	2889.44	2278.15	3500.72	1.53665	0.619789	3.25573e-08	3.1564e-06
chr19	-	52628651	52684793	20	Ap1g1	NM_134460	401.844	316.804	486.883	1.53686	0.619983	3.71305e-05	0.00141309
chr8	-	131995142	132061908	19	Fyco1	NM_001106870	785.973	619.534	952.412	1.5373	0.620403	0.00161174	0.0268468
chr7	-	77258858	77265053	4	Klf10	NM_031135	459.104	361.746	556.461	1.53827	0.621305	0.00450672	0.0568454
chr2	-	221899187	221921857	27	Wdr3	NM_001107705	216.063	170.168	261.958	1.53941	0.622377	0.000585788	0.0129032
chr11	+	67357136	67386470	9	Tmem39a	NM_001013865	158.109	124.501	191.717	1.53989	0.622827	0.000358568	0.00875459
chr11	-	70812296	70845020	11	Parp9	NM_001103351	594.602	468.052	721.151	1.54075	0.623634	4.56283e-07	3.15643e-05
chr7	+	35137596	35189641	14	Nr2c1	NM_145780	124.253	97.7966	150.71	1.54105	0.623918	0.000331834	0.00819223
chr3	-	78793336	78809760	3	Rtn4rl2	NM_181380	215.608	169.689	261.527	1.54122	0.624069	0.00334727	0.0460232
chr13	+	103624307	103716372	7	Itpkb	NM_019312	48.3775	38.0717	58.6832	1.54138	0.624226	0.00721205	0.0807677
chr9	+	46343467	46467917	29	Map4k4	NM_001106904	144.072	113.33	174.814	1.54253	0.625295	0.000117563	0.00364829
chr20	+	46526298	46683995	32	Rev3l	NM_001083966	170.988	134.35	207.626	1.54541	0.627989	3.50941e-05	0.00136292
chr6	-	53084390	53086222	3	Id2	NM_013060	296.55	232.992	360.108	1.54558	0.628151	4.34059e-05	0.0016059
chr1	-	283249426	283309049	21	Gpam	NM_017274	821.841	645.461	998.221	1.54653	0.629031	0.00651467	0.0748511
chr12	+	33261859	33283619	10	Stx2	NM_012748	118.147	92.7753	143.518	1.54694	0.629422	0.000266386	0.00696484
chr19	+	11360526	11395931	17	Bbs2	NM_053618	92.7609	72.8069	112.715	1.54813	0.63053	0.000618387	0.0133335
chr8	-	56785486	56835567	19	Cul5	NM_022683	94.656	74.2925	115.019	1.5482	0.63059	0.000872581	0.0172979
chr7	-	63737799	63801753	5	Rassf3	NM_001108747	1508.97	1183.42	1834.51	1.55017	0.632431	2.50733e-08	2.52291e-06
chr19	+	63314210	63356423	15	Usp10	NM_001034146	321.585	252.098	391.071	1.55126	0.633445	1.10946e-05	0.000504653
chr7	-	11953819	11992519	29	Dot1l	NM_001108733	289.748	227.08	352.415	1.55194	0.634075	4.5728e-06	0.000228331
chr13	-	56637004	56836014	26	Ppp1r12b	NM_001107178	140.111	109.78	170.442	1.55258	0.63467	8.42829e-05	0.00277778
chr11	+	80084426	80096284	4	Rtp4	NM_001108321	107.882	84.5191	131.244	1.55284	0.634907	0.00112989	0.0208337
chr3	-	129743621	129876576	37	RGD1565616	NM_001109206	377.986	295.97	460.001	1.55421	0.636186	0.000245266	0.00651524
chr1	-	238529968	238665455	19	Tle4	NM_019141	57.5815	45.0742	70.0887	1.55496	0.636879	0.00335768	0.0460234
chr1	+	268790065	268814981	9	Pi4k2a	NM_053735	247.852	193.919	301.785	1.55624	0.638066	1.49591e-05	0.000657904
chr5	-	164037420	164064397	15	Dnajc16	NM_001014194	86.8729	67.9023	105.844	1.55876	0.6404	0.000737101	0.0151551
chr7	+	2774351	2788002	28	Ankrd52	NM_001191875	131.562	102.797	160.327	1.55965	0.64122	0.000140374	0.00420869
chr6	+	52565187	52571773	12	Odc1	NM_012615	202.971	158.584	247.358	1.55979	0.64135	9.5751e-06	0.000441585
chr6	-	73754559	73758774	4	Dnajb9	NM_012699	592.629	462.901	722.357	1.5605	0.64201	0.000790102	0.0159972
chr3	+	176429998	176438297	3	Fam210b	NM_001106547	525.516	410.363	640.668	1.56122	0.642676	0.000103584	0.00326794
chr7	+	117592680	117596091	5	Slc52a2	NM_001109670	45.8984	35.8305	55.9663	1.56197	0.64337	0.00878402	0.0928896
chr19	-	591891	595934	2	Pdp2	NM_145091	289.051	225.627	352.475	1.56221	0.643585	3.80369e-05	0.00144345
chr18	-	5987817	6050274	11	Ss18	NM_001100900	380.146	296.38	463.912	1.56526	0.646405	4.22231e-07	2.93616e-05
chr1	+	206989243	207013177	4	Bag3	NM_001011936	567.827	442.628	693.025	1.56571	0.646815	1.08284e-07	9.10271e-06
chr14	+	82027601	82048732	17	Nop14	NM_001106013	107.886	84.0807	131.692	1.56626	0.64732	0.000783567	0.0158891
chr2	-	48055052	48096606	15	Acot12	NM_130747	1426.11	1110.82	1741.41	1.56768	0.648632	8.42547e-09	9.90329e-07
chr15	+	74335409	74468101	14	Tdrd3	NM_001012043	47.4321	36.9424	57.9218	1.56789	0.648828	0.00633405	0.0733469
chr9	+	9578003	9637940	34	Ptprs	NM_019140	1222.76	952.237	1493.29	1.56819	0.649104	1.06545e-08	1.20951e-06
chr1	+	152560124	152585295	25	Hcfc1	NM_001139507	100.292	77.9634	122.621	1.5728	0.653336	0.0015941	0.026619
chr3	+	129303486	129308279	12	Nop56	NM_001025732	119.628	92.9925	146.263	1.57284	0.653375	0.0016302	0.0270015
chr1	+	225437308	225497586	19	Cpt1a	NM_031559	6199.53	4819.1	7579.96	1.5729	0.653428	2.1109e-08	2.1734e-06
chr14	+	78899824	78964642	9	LOC680039	NM_001109388	375.041	291.494	458.589	1.57324	0.653737	1.02487e-06	6.36091e-05
chr6	-	124579898	124607638	9	Gtf2a1	NM_022208	57.7988	44.9225	70.6752	1.57327	0.653767	0.00340804	0.0464941
chr5	+	170960572	171292513	23	Rere	NM_053885	401.637	312.109	491.165	1.5737	0.654158	6.70087e-07	4.40599e-05
chr13	-	93672063	93854844	16	Atf6	NM_001107196	470.752	365.714	575.789	1.57442	0.654824	2.37314e-05	0.000972841
chr8	-	129723895	129725866	2	Cyp8b1	NM_031241	6267.68	4865.37	7669.99	1.57644	0.656674	0.0012445	0.0221574
chr8	-	76241675	76432611	28	Myo1e	NM_173101	425.978	330.481	521.474	1.57792	0.658026	4.72299e-07	3.2503e-05
chrX	+	115875187	115882578	8	Gpd1	NM_022215	6151.87	4772.58	7531.16	1.57801	0.658103	8.64268e-06	0.000402779
chr8	-	67424000	67437273	2	Fem1b	NM_001108157	48.2962	37.4556	59.1368	1.57885	0.658876	0.00838528	0.0897448
chr14	-	9358066	9418520	13	Cds1	NM_031242	40.3951	31.3192	49.4709	1.57957	0.65953	0.00913303	0.0947694
chr7	+	12641926	12685802	33	Sbno2	NM_001108068	374.457	289.737	459.178	1.58481	0.664309	3.95169e-07	2.77705e-05
chr1	+	82656241	82664190	3	Irgq	NM_001135742	280.453	216.954	343.952	1.58537	0.664816	6.15418e-06	0.000297236
chr4	-	65836585	65876469	9	Zc3hav1	NM_173045	261.78	202.383	321.178	1.58698	0.666288	1.28962e-05	0.000576726
chr7	-	142750120	142773323	30	Itga5	NM_001108118	413.379	319.331	507.427	1.58903	0.668147	4.6394e-06	0.000230788
chr14	+	17144965	17150220	4	Cxcl9	NM_145672	65.6963	50.7208	80.6717	1.5905	0.669484	0.0011139	0.020577
chr2	-	147587582	147603481	3	Pgrmc2	NM_001008374	1701.44	1313.57	2089.3	1.59056	0.669531	1.14269e-08	1.28621e-06
chr3	-	58917759	58990221	26	Ttc21b	NM_001191737	46.8456	36.1632	57.5279	1.59078	0.669739	0.00658362	0.0752528
chr17	-	11953812	12062583	23	Nsd1	NM_001107337	547.625	422.58	672.67	1.59182	0.670673	0.000410056	0.00972565
chr15	+	44749845	44875232	13	Spata13	NM_001191686	163.003	125.708	200.298	1.59336	0.672072	1.35184e-05	0.000600508
chr20	+	25003933	25086734	8	Reep3	NM_001106386	581.545	447.984	715.105	1.59627	0.674708	3.01041e-05	0.00118648
chr16	+	81075551	81101397	7	Dcun1d2	NM_001134798	52.182	40.1334	64.2307	1.60043	0.67846	0.00288908	0.0411382
chr12	+	15837334	15940348	35	Tnrc18	NM_001107123	568.915	437.467	700.362	1.60095	0.678929	6.81048e-08	6.03045e-06
chr10	-	37043430	37084794	12	Phf15	NM_001106998	83.9832	64.5698	103.397	1.60132	0.679257	0.00212761	0.0328211
chr11	-	67395536	67508274	12	Arhgap31	NM_001105879	45.9255	35.242	56.609	1.6063	0.683738	0.0088426	0.0932863
chrX	-	114723349	114749903	8	Ccnt1	NM_001108110	80.12	61.4662	98.7738	1.60696	0.684336	0.00143224	0.0245458
chr6	-	135031497	135065319	11	Atxn3	NM_021702	190.966	146.452	235.481	1.60791	0.685185	3.11182e-06	0.00016145
chr2	+	218142370	218146251	4	Hfe2	NM_001012080	1657.69	1270.19	2045.2	1.61015	0.687196	3.06702e-09	4.1996e-07
chr3	+	170968974	170990259	3	Pard6b	NM_001108609	58.8512	45.0413	72.6611	1.61321	0.689935	0.000685748	0.0143209
chr9	+	64810459	64896031	36	Aox3	NM_001008527	2858.84	2187.3	3530.38	1.61404	0.690674	0.00110334	0.0204102
chr8	+	70480935	70534998	14	Clpx	NM_001007803	2330.15	1780.07	2880.22	1.61804	0.694246	9.51971e-10	1.42068e-07
chrX	-	73220951	73355698	33	Phka1	NM_022626	48.5481	37.0187	60.0776	1.6229	0.698573	0.00500199	0.0614242
chr13	-	53032716	53098045	6	Rassf5	NM_019365	112.975	86.1405	139.81	1.62305	0.698705	0.000258576	0.00684144
chr19	-	42803061	42846155	21	Otud4	NM_001191700	180.423	137.367	223.479	1.62688	0.702106	0.000153326	0.00447576
chr3	-	11358265	11378548	12	Brd3	NM_001108575	367.673	279.873	455.472	1.62742	0.70259	1.46725e-06	8.70001e-05
chr2	+	126968261	127093734	16	Tbl1xr1	NM_001108941	1114.93	846.156	1383.7	1.63528	0.709533	6.77613e-10	1.02273e-07
chr5	-	128436022	128503874	9	Prkaa2	NM_023991	506.001	383.962	628.04	1.63568	0.709891	0.00185242	0.0295364
chr3	+	166185906	166204128	5	Ttpal	NM_001106537	281.368	213.48	349.256	1.63602	0.710186	0.000194523	0.00540514
chr8	-	127229272	127233342	6	Myd88	NM_198130	398.473	301.387	495.56	1.64426	0.717443	3.59691e-08	3.46189e-06
chr2	+	162370017	162389653	13	Proser1	NM_001107676	114.144	86.2376	142.05	1.64719	0.720005	5.3967e-05	0.0019013
chr10	-	65902794	65909229	5	Slc46a1	NM_001013969	515.408	389.06	641.755	1.6495	0.722029	4.09976e-08	3.86191e-06
chr12	-	46075019	46109147	11	Fbxo21	NM_001108338	661.894	499.198	824.591	1.65183	0.724068	7.40607e-09	8.86193e-07
chr2	-	132830965	133061245	25	Fndc3b	NM_001191704	557.523	419.749	695.296	1.65646	0.728102	0.00250734	0.037168
chr10	-	58550464	58574301	12	Slc13a5	NM_170668	89.2144	67.1293	111.299	1.65798	0.729431	0.00109821	0.0203722
chr14	-	20386110	20723823	26	Slc4a4	NM_053424	271.952	204.523	339.382	1.65938	0.730643	1.21629e-06	7.4446e-05
chr9	+	66300035	66323766	15	Nop58	NM_021754	176.314	132.546	220.081	1.66041	0.73154	0.00246197	0.0368658
chr12	+	38748527	38909933	47	Ncor2	NM_001108334	642.187	482.362	802.012	1.66268	0.733509	1.32174e-08	1.43896e-06
chr16	+	20379056	20388079	5	Pgpep1	NM_201988	882.881	663.136	1102.63	1.66275	0.733569	3.58415e-05	0.00138323
chr17	-	23562521	23573599	10	Pak1ip1	NM_001037356	31.3721	23.5592	39.185	1.66326	0.73401	0.00911695	0.0946963
chr16	-	48653022	48697521	20	Acsl1	NM_012820	26325.8	19764.7	32886.9	1.66392	0.734587	6.8229e-11	1.2946e-08
chr19	+	60482637	60528944	11	Gan	NM_001107434	38.35	28.7888	47.9111	1.66422	0.734849	0.00649537	0.0746939
chr3	-	16791265	16801399	10	Slc25a25	NM_145677	1510.33	1132.62	1888.05	1.66698	0.737237	1.16424e-08	1.29945e-06
chr19	-	52555244	52621851	20	Phlpp2	NM_001109131	63.9146	47.9254	79.9038	1.66725	0.737474	0.000497436	0.011276
chr5	+	80949470	80982922	11	Hsdl2	NM_001025697	486.293	364.259	608.327	1.67004	0.739883	0.000416258	0.00976259
chr1	-	221166925	221169993	9	Irf7	NM_001033691	173.627	130.046	217.207	1.67024	0.740052	0.00181199	0.0291367
chr10	-	66217747	66283043	3	Fam222b	NM_001109038	399.501	299.161	499.84	1.67081	0.740546	2.78976e-08	2.7652e-06
chr10	+	4022543	4035231	2	Dexi	NM_001109026	748.72	560.545	936.895	1.6714	0.741057	4.8865e-08	4.47604e-06
chr14	-	44952287	44974726	6	Klf3	NM_001105742	343.849	257.07	430.627	1.67514	0.744281	6.12574e-07	4.11668e-05
chr3	+	166127519	166155667	10	Hnf4a	NM_022180	160.28	119.72	200.84	1.67758	0.746382	0.000300404	0.00754248
chr11	-	77360108	77362521	4	Hes1	NM_024360	241.212	180.049	302.374	1.6794	0.747943	2.91768e-06	0.000153026
chr2	+	266707527	266725952	11	Gbp5	NM_001108569	40.9264	30.5393	51.3136	1.68025	0.748676	0.00405121	0.0529461
chr15	+	48799899	48836811	19	Ephx2	NM_022936	857.855	639.962	1075.75	1.68096	0.749281	1.90606e-09	2.72219e-07
chr10	-	15882112	15940027	9	Cpeb4	NM_001106992	326.658	243.426	409.891	1.68384	0.751758	2.5213e-05	0.00102724
chr10	-	64601742	64705829	15	Rab11fip4	NM_001107023	80.3592	59.8737	100.845	1.68429	0.752143	0.000151119	0.00444063
chr5	-	62404325	62409772	3	RGD1309821	NM_001108971	382.979	285.228	480.73	1.68542	0.753112	0.000146129	0.00432275
chr19	-	32449453	32501769	14	Lonp2	NM_001033689	1869.41	1391.69	2347.12	1.68652	0.754052	6.57257e-11	1.26517e-08
chr9	-	87782498	87835248	2	Irs1	NM_012969	446.457	332.235	560.679	1.6876	0.754971	3.59222e-09	4.76074e-07
chr1	-	172227725	172241918	4	P2ry2	NM_017255	728.61	542.136	915.085	1.68793	0.755252	8.75529e-08	7.50244e-06
chr2	-	207104464	207109243	4	Tmem79	NM_001033896	45.5049	33.8473	57.1626	1.68884	0.756032	0.00221886	0.0338772
chr16	+	73249355	73282221	13	Agpat6	NM_001047849	1082.18	804.812	1359.55	1.68928	0.756406	2.13172e-10	3.49549e-08
chr10	+	71431884	71630271	52	Acaca	NM_022193	1053.54	783.024	1324.06	1.69096	0.757839	0.00434521	0.0555875
chr2	-	242815723	242845826	6	Tmem56	NM_001135879	111.998	83.2085	140.788	1.692	0.758726	4.6142e-05	0.00168831
chr2	+	70791262	70809191	11	Hmgcs1	NM_017268	3491.89	2593.05	4390.73	1.69327	0.75981	1.28521e-05	0.000576697
chr10	-	73750014	73769423	7	Trim25	NM_001009536	315.479	234.162	396.796	1.69453	0.760887	1.24917e-07	1.02417e-05
chr3	-	131661587	131706004	20	Gpcpd1	NM_198779	249.387	184.847	313.927	1.69831	0.764098	1.04505e-07	8.84103e-06
chr2	-	82388506	82452818	15	Mtmr12	NM_001012077	61.5996	45.6305	77.5688	1.69993	0.765479	0.000585803	0.0129032
chr11	+	39606998	39623785	10	Ets2	NM_001107107	546.248	404.597	687.898	1.7002	0.765708	0.000703751	0.0146279
chr1	-	81896926	81931943	9	Pvrl2	NM_001012064	759.056	562.124	955.989	1.70067	0.766106	6.42756e-07	4.26854e-05
chr6	-	144512072	144524703	13	Tnfaip2	NM_001137633	476.39	352.464	600.317	1.7032	0.768248	0.00137266	0.0237392
chr9	+	84327547	84351513	14	Acsl3	NM_057107	128.382	94.8533	161.911	1.70696	0.771427	2.163e-06	0.000119207
chr4	-	55246412	55267999	5	Zfp800	NM_001109225	59.5662	43.9913	75.1412	1.7081	0.772388	0.000589291	0.0129158
chr10	+	13614558	13627901	7	Eci1	NM_017306	1940.24	1431.53	2448.95	1.71071	0.774599	1.25935e-10	2.26036e-08
chr4	-	243667911	243693775	4	Kras	NM_031515	58.1149	42.8723	73.3575	1.71107	0.774897	0.00279148	0.0400955
chr13	-	93279048	93562008	10	Nos1ap	NM_138922	58.2609	42.9754	73.5463	1.71136	0.77514	0.000343125	0.00843961
chr2	+	206915180	206941044	11	Mef2d	NM_030860	181.674	133.981	229.367	1.71194	0.775631	6.30558e-07	4.20858e-05
chr2	-	279235990	279258253	8	Lhx8	NM_001012219	72.8975	53.7241	92.0709	1.71377	0.777176	0.00124306	0.0221574
chr1	-	24089365	24099667	7	Vnn1	NM_001025623	228.982	168.425	289.54	1.71911	0.781662	0.00289185	0.0411382
chr17	-	6525246	6683920	26	Dapk1	NM_001107335	434.942	319.84	550.043	1.71974	0.782191	1.48424e-08	1.56458e-06
chr1	+	273260271	273270982	13	Nolc1	NM_022869	162.089	119.178	204.999	1.72011	0.782502	7.04878e-07	4.58931e-05
chr18	-	70602148	70834596	5	Ctif	NM_001108891	124.224	91.2716	157.176	1.72207	0.784147	7.32353e-06	0.000347397
chr6	+	141932381	141938016	6	Slc25a47	NM_001001509	7437.65	5458.53	9416.77	1.72515	0.786721	0.00106827	0.0201486
chr1	+	203927970	203952929	11	Il4r	NM_133380	1455.45	1067.82	1843.07	1.72601	0.787438	1.04581e-11	2.17037e-09
chr5	-	166815371	166845910	10	Tnfrsf1b	NM_130426	534.939	392.396	677.483	1.72653	0.787873	8.40856e-07	5.36935e-05
chr10	-	106834584	106916333	13	Cyth1	NM_053910	61.3127	44.9219	77.7035	1.72975	0.790561	0.000179276	0.0050235
chr12	+	11840784	11904808	10	Lnx2	NM_001108329	294.419	215.554	373.284	1.73174	0.792223	2.03498e-07	1.57143e-05
chr8	+	129932816	129971328	6	Snrk	NM_138833	49.0091	35.8568	62.1614	1.7336	0.793772	0.000778391	0.0158567
chr5	-	67707024	67711584	2	Alg2	NM_001100710	153.856	112.513	195.198	1.7349	0.79485	5.991e-05	0.00205614
chr18	+	55596757	55637692	23	Pdgfrb	NM_031525	308.882	225.882	391.881	1.7349	0.794851	1.33453e-06	7.98436e-05
chr17	+	21184043	21559271	7	Atxn1	NM_012726	173.336	126.66	220.012	1.73703	0.796619	1.86655e-05	0.00078454
chr7	-	23694445	23744372	7	Timp3	NM_012886	46.8322	34.2048	59.4596	1.73834	0.797713	0.00121063	0.021844
chr16	+	18915108	18927347	6	Slc35e1	NM_001109107	390.827	285.09	496.564	1.74178	0.800563	1.75124e-07	1.37633e-05
chr2	-	147311813	147384522	11	Mfsd8	NM_001047910	74.5447	54.3139	94.7755	1.74496	0.803193	8.14307e-05	0.00269045
chr17	-	91983425	92183054	50	Lyst	NM_053518	415.666	302.672	528.66	1.74664	0.804582	1.66554e-06	9.70253e-05
chr1	-	225286481	225316676	24	Tpcn2	NM_001107566	312.371	227.41	397.331	1.7472	0.805045	2.40794e-07	1.78672e-05
chr1	+	9755846	9953696	8	Hivep2	NM_024137	54.8249	39.9028	69.7469	1.74792	0.80564	0.000157858	0.00457787
chr5	+	43880678	43885851	3	Ndufaf4	NM_198783	26.7429	19.4324	34.0534	1.7524	0.809332	0.00904637	0.0943211
chr12	+	41434650	41482924	20	Atp2a2	NR_027839	80.4913	58.4667	102.516	1.75341	0.81016	9.66156e-05	0.00311476
chr4	+	45382346	45459515	20	Met	NM_031517	676.178	490.945	861.412	1.7546	0.811144	5.91608e-07	4.01247e-05
chr14	-	5409656	5416207	2	Lrrc8b	NM_001107204	228.045	164.966	291.123	1.76475	0.819464	1.42715e-07	1.15581e-05
chr17	+	37641854	37716592	7	E2f3	NM_001137626	52.7762	38.1243	67.4282	1.76864	0.822641	0.000273479	0.00708253
chr5	+	79083350	79123671	4	Akap2	NM_001011974	232.231	167.716	296.745	1.76933	0.823204	5.08567e-05	0.0018207
chr13	-	93262800	93267937	3	LOC100361087	NM_001190459	35.5222	25.6298	45.4146	1.77195	0.825336	0.00202511	0.0317792
chr1	+	224945380	224952084	5	Oraov1	NM_001107565	151.645	109.254	194.035	1.77599	0.828627	4.44082e-08	4.12468e-06
chr13	-	60518084	60586290	9	Nek7	NM_001108346	114.888	82.7671	147.008	1.77617	0.828769	0.0021696	0.033386
chr11	+	70846233	70855845	5	Dtx3l	NM_001109053	181.712	130.829	232.595	1.77786	0.830139	1.77307e-07	1.38529e-05
chr10	+	89084063	89094266	5	G6pc	NM_013098	7717.14	5550.1	9884.17	1.7809	0.832606	3.28794e-05	0.00128442
chr16	+	60596309	60737794	27	Tnks	NM_001106084	113.795	81.7409	145.85	1.78429	0.835353	2.18693e-06	0.000120028
chr13	+	110769391	111326800	8	Esrrg	NM_203336	73.7504	52.9679	94.5329	1.78472	0.835698	0.00733761	0.0818288
chr8	-	22846153	22875377	12	Kank2	NM_001270413	316.981	227.53	406.432	1.78627	0.836953	1.08489e-06	6.67107e-05
chr7	+	11469365	11481943	21	Tjp3	NM_001108073	244.411	175.433	313.39	1.78638	0.837043	0.000110353	0.00345687
chr10	+	63306285	63449250	23	Abr	NM_001105814	72.3693	51.5252	93.2135	1.80909	0.855262	4.80409e-05	0.00174816
chr10	-	84861027	84874814	10	Tbkbp1	NM_172021	62.7026	44.6018	80.8034	1.81166	0.857313	0.0055638	0.0660987
chr18	+	59956810	59956895	1	Mir122	NR_031864	157.582	112.053	203.111	1.81263	0.858088	0.00250037	0.0371061
chr1	+	243339732	243621053	21	Pcsk5	NM_053823	149.28	106.064	192.496	1.81491	0.859895	6.71758e-08	6.0054e-06
chr5	-	137989326	138000280	13	Cyp4a2	NM_001044770	14842.8	10537.6	19148	1.81712	0.861655	7.53876e-16	2.635e-13
chr20	-	12845507	12855040	14	Sik1	NM_021693	171.065	121.266	220.864	1.82131	0.864979	1.61236e-07	1.27472e-05
chr6	-	43472712	43474862	1	Rhob	NM_022542	218.255	153.613	282.896	1.84161	0.880967	3.95889e-09	5.10504e-07
chr2	+	173193500	173275027	23	Mme	NM_012608	23.3044	16.402	30.2068	1.84165	0.880999	0.0048882	0.060508
chr16	-	59803006	59882577	3	Mfhas1	NM_001107316	59.7205	41.9855	77.4555	1.84482	0.883477	6.88705e-05	0.00232758
chr4	+	224199924	224240593	13	Lpcat3	NM_001012189	1292.04	907.519	1676.57	1.84742	0.885509	3.03236e-10	4.91169e-08
chr4	+	149256225	149336532	9	Wipf3	NM_147211	40.6768	28.5575	52.7961	1.84876	0.88656	0.000708519	0.014704
chr15	+	27721128	27820974	12	Samd4a	NM_001107254	90.4631	63.4204	117.506	1.85281	0.889715	4.17279e-06	0.000211538
chr14	-	104777089	104784596	5	Lgalsl	NM_001134730	468.355	328.021	608.689	1.85564	0.891915	2.15621e-05	0.000889405
chr3	-	156464192	156481427	4	Pxmp4	NM_172223	843.243	589.986	1096.5	1.85852	0.89415	2.52995e-09	3.53714e-07
chr2	+	99796581	99921964	13	Ankh	NM_053714	1081.22	755.283	1407.17	1.8631	0.897703	5.3304e-10	8.13775e-08
chr8	+	22092154	22103917	7	Icam1	NM_012967	546.012	380.4	711.624	1.87073	0.903599	1.05742e-13	2.55358e-11
chr11	-	41762130	41784396	8	Ripk4	NM_001107103	169.606	118.061	221.15	1.87319	0.905496	8.76426e-07	5.54318e-05
chr5	-	142276594	142279846	3	Ppcs	NM_001039010	634.93	441.867	827.992	1.87385	0.906004	5.92112e-07	4.01247e-05
chr5	+	158075303	158079808	11	Gale	NM_080783	129.85	90.3519	169.349	1.87432	0.906369	0.00715768	0.0803127
chr1	+	264652841	264956664	33	Plce1	NM_053758	165.81	115.363	216.256	1.87457	0.906558	1.93632e-07	1.50399e-05
chr11	-	85830849	86018056	15	Map3k13	NM_001013978	236.816	164.692	308.94	1.87587	0.907559	4.96944e-10	7.67489e-08
chr2	+	60970299	60976058	14	Plk2	NM_031821	528.358	367.351	689.365	1.87658	0.908109	7.09748e-13	1.62532e-10
chr5	+	34300931	34335368	16	Nbn	NM_138873	375.313	260.749	489.876	1.87872	0.909751	6.21924e-08	5.61932e-06
chr4	-	217290882	217305501	5	Lrtm2	NM_001109430	664.155	461.299	867.011	1.8795	0.910349	1.98181e-06	0.000111065
chr6	-	131991385	132118723	43	Eml5	NM_001003402	114.374	79.387	149.361	1.88143	0.911832	7.74438e-08	6.72293e-06
chr17	-	24806009	24837335	3	Tmem170b	NM_001008774	29.7378	20.6375	38.838	1.88191	0.912199	0.000904403	0.0178224
chr9	-	54003667	54038463	23	Stat1	NM_001034164	27.47	19.0282	35.9117	1.88729	0.916314	0.00522483	0.0633639
chr20	+	42829885	42831873	1	Tspyl4	NM_001012075	58.6061	40.5431	76.669	1.89105	0.919187	0.00513995	0.062632
chr7	+	70981251	70988655	12	Stac3	NM_001130558	1120.04	774.277	1465.81	1.89313	0.920774	1.81071e-10	3.00623e-08
chr8	+	79195917	79934499	10	Rora	NM_001106834	86.4636	59.7144	113.213	1.8959	0.922886	1.2366e-06	7.53418e-05
chr20	+	13102428	13123972	11	Pdxk	NM_031769	89.7623	61.9402	117.584	1.89835	0.924748	3.92311e-06	0.00020041
chr2	-	243374188	243409600	22	Abcd3	NM_012804	4555.12	3139.15	5971.09	1.90214	0.927622	9.85321e-17	3.73915e-14
chr18	-	56048372	56099677	16	Arhgef37	NM_001100974	52.9714	36.445	69.4978	1.90692	0.931247	0.00151021	0.0255198
chr20	-	5427599	5441809	21	Ppp1r10	NM_022951	278.694	191.737	365.652	1.90705	0.931345	1.1606e-07	9.69503e-06
chr14	-	5278307	5369415	4	Lrrc8c	NM_001037179	38.4773	26.4697	50.485	1.90728	0.931515	0.000420929	0.00982563
chr8	+	116830970	116890072	11	Prkar2a	NM_019264	325.189	223.643	426.735	1.90811	0.932142	1.63398e-11	3.33884e-09
chr9	+	53229086	53240763	5	Inpp1	NM_001012131	52.9705	36.4173	69.5238	1.90909	0.932882	9.33236e-05	0.00304551
chr3	-	171384480	171500358	10	Nfatc2	NM_001107805	19.7384	13.5555	25.9213	1.91224	0.935263	0.00907574	0.0945443
chr14	+	34242960	34282766	20	Clock	NM_021856	106.974	73.3483	140.599	1.91687	0.938754	3.27362e-07	2.35028e-05
chr16	+	46157682	46657495	29	Odz3	NM_001169133	29.6549	20.3194	38.9903	1.91887	0.940255	0.0010481	0.0198586
chr9	-	60683824	60717610	18	Gtf3c3	NM_001108239	140.715	96.4137	185.016	1.91898	0.940338	1.21257e-08	1.34211e-06
chr4	-	49938568	49993864	23	Aass	NM_001100963	3259.74	2232.06	4287.42	1.92083	0.941733	1.3288e-09	1.96101e-07
chr7	-	29399165	29479994	62	Utp20	NM_001191779	129.558	88.5378	170.579	1.92662	0.94607	2.04058e-08	2.11742e-06
chr1	+	88190415	88196614	10	Ech1	NM_022594	2266.74	1548.14	2985.35	1.92835	0.947369	1.00348e-08	1.15898e-06
chr2	+	135727660	135791251	13	Phc3	NM_001107662	84.8875	57.7884	111.987	1.93788	0.954477	0.001095	0.0203409
chr15	+	62345357	62348601	3	Tsc22d1	NM_013043	148.729	100.446	197.011	1.96136	0.971857	0.00152447	0.0257282
chr12	-	43473323	43480635	9	Sds	NM_053962	1217.05	820.622	1613.48	1.96616	0.975383	5.13113e-05	0.00182848
chr3	-	44691126	44692544	1	Rprm	NM_001044276	22.8096	15.3751	30.2441	1.96709	0.976063	0.00441767	0.0559347
chr3	+	165557661	165581916	14	Sgk2	NM_134463	191.716	128.85	254.582	1.97581	0.982443	2.82535e-07	2.06189e-05
chr13	+	54143332	54151418	5	Klhdc8a	NM_001100683	43.1533	28.9491	57.3575	1.98132	0.986462	0.000747653	0.0152985
chr13	-	79688896	79840482	14	Rasal2	NM_001107188	40.2766	26.9489	53.6044	1.98912	0.992128	0.000199947	0.00553269
chrX	+	128507448	128543727	8	Xiap	NM_022231	289.752	193.821	385.683	1.98989	0.992688	0.000118127	0.00365726
chr4	+	185912101	186011677	8	Mgll	NM_138502	239.746	160.289	319.203	1.99143	0.993803	4.88259e-10	7.62948e-08
chr1	+	264556960	264563395	3	Slc35g1	NM_001191635	56.8421	37.964	75.7202	1.99452	0.996044	2.43368e-05	0.000994589
chr4	+	22018261	22053087	17	Crot	NM_031987	3699.98	2470.2	4929.76	1.9957	0.996892	1.74557e-14	4.63693e-12
chr8	+	47424069	47452698	11	Bcl9l	NM_001106817	543.317	362.039	724.596	2.00143	1.00103	6.51146e-15	1.8922e-12
chr9	+	97871991	97939938	8	Lrrfip1	NM_001014269	297.323	197.332	397.314	2.01343	1.00966	2.62306e-08	2.61951e-06
chr1	+	218132462	218166450	9	Ppp2r2d	NM_144746	105.672	69.7965	141.547	2.028	1.02006	1.44948e-08	1.54016e-06
chr1	+	42667184	42931332	9	Esr1	NM_012689	164.976	108.905	221.046	2.02971	1.02128	1.68101e-05	0.000721686
chr2	+	218170101	218173902	8	Txnip	NM_001008767	1313.44	866.894	1759.99	2.03023	1.02164	1.81447e-05	0.000765072
chr2	-	42417997	42437489	8	Bhmt	NM_030850	11293.3	7419.2	15167.3	2.04434	1.03163	1.78813e-14	4.65685e-12
chr12	-	49237541	49249899	6	Oasl	NM_001009681	49.0625	32.174	65.9509	2.04982	1.0355	0.00107629	0.0202196
chr7	+	132531604	132693763	51	Lrrk2	NM_001191789	18.3825	12.0536	24.7113	2.05012	1.0357	0.00454137	0.0570658
chr4	+	34142802	34470794	11	Glcci1	NM_001177442	103.925	68.0165	139.833	2.05587	1.03975	4.28732e-08	4.01015e-06
chr4	-	62520611	62563297	17	Slc13a4	NM_001012621	423.194	276.736	569.652	2.05847	1.04157	9.30123e-16	3.16766e-13
chr2	+	219662510	219793306	35	Notch2	NM_024358	300.323	196.308	404.339	2.05972	1.04245	3.97658e-13	9.4316e-11
chr9	+	100037559	100093411	31	Sned1	NM_001167842	111.323	72.743	149.903	2.06072	1.04315	1.67019e-09	2.41125e-07
chr6	+	61753124	61787575	11	Nampt	NM_177928	1498.42	975.52	2021.32	2.07205	1.05106	1.51e-07	1.20095e-05
chr19	+	48341840	48347084	5	Hsd11b2	NM_017081	21.7793	14.1482	29.4103	2.07873	1.0557	0.00380508	0.0504383
chr2	+	226529293	226549303	5	Slc16a1	NM_012716	1283.37	831.234	1735.51	2.08787	1.06203	2.59672e-20	1.43707e-17
chr14	-	10293025	10343730	12	Agpat9	NM_001025670	34.103	22.0309	46.1752	2.09593	1.06759	0.00378662	0.0503947
chr4	-	188176237	188245992	15	Slc6a6	NM_017206	315.263	202.984	427.541	2.10627	1.07469	0.000656973	0.0138287
chr2	-	119962230	120107977	10	Hnf4g	NM_001108939	119.635	76.6501	162.62	2.12159	1.08515	4.37505e-09	5.58745e-07
chr15	+	8654577	8696346	5	Kcnk5	NM_001039516	77.7797	49.8202	105.739	2.12241	1.0857	6.73697e-08	6.0054e-06
chr4	+	220895596	220922139	11	Usp18	NM_001014058	111.349	71.2754	151.422	2.12446	1.0871	2.71278e-05	0.00109144
chr13	+	79075162	79253783	14	Abl2	NM_001107186	41.8376	26.635	57.0402	2.14155	1.09866	0.00318591	0.0441704
chr1	+	163889818	163903654	3	Rab30	NM_001015012	573.225	363.972	782.479	2.14983	1.10423	3.03824e-08	2.9672e-06
chr3	-	166047353	166053866	2	Fitm2	NM_001107799	1055.23	665.569	1444.89	2.1709	1.1183	6.91607e-20	3.40219e-17
chr8	+	102795764	102798061	1	Paqr9	NM_001271152	2094.21	1316.64	2871.77	2.18113	1.12508	1.53424e-10	2.61853e-08
chr9	-	82880599	83022444	18	Epha4	NM_001162411	16.9066	10.6165	23.1967	2.18497	1.12762	0.00297386	0.0419308
chr10	-	30850033	30862963	4	Lsm11	NM_001173384	16.9828	10.6506	23.3151	2.18908	1.13033	0.00321899	0.044536
chr8	-	101623522	101642666	3	RGD1309079	NM_001134472	490.865	306.93	674.801	2.19855	1.13655	1.41454e-05	0.000626264
chr9	+	9943002	9948729	9	Plin5	NM_001134637	110.935	68.8866	152.984	2.2208	1.15108	3.88962e-08	3.69014e-06
chr13	+	113004596	113060843	5	Prox1	NM_001107201	933.956	578.01	1289.9	2.23163	1.1581	1.98714e-15	6.59829e-13
chr10	-	62340335	62345727	2	Abhd15	NM_001107025	225.907	139.594	312.221	2.23663	1.16133	7.80809e-15	2.16056e-12
chr10	+	61748819	61822597	2	Rtn4rl1	NM_181377	214.51	132.364	296.657	2.24123	1.16429	1.16819e-10	2.12547e-08
chr1	-	57354079	57362996	4	Dact2	NM_001107464	156.186	95.9828	216.389	2.25446	1.17278	7.04441e-14	1.73266e-11
chr17	-	29453341	29579484	13	Rreb1	NM_001107348	757.603	463.76	1051.45	2.26722	1.18092	2.85049e-14	7.28081e-12
chr4	+	153516056	153540007	7	Ppm1k	NM_001107863	726.328	443.51	1009.15	2.27536	1.18609	3.23966e-17	1.30391e-14
chr3	-	125585191	125603276	12	Hdc	NM_017016	57.075	34.8161	79.3339	2.27866	1.18818	0.000201801	0.00557239
chr3	-	48183782	48189254	7	Nr4a2	NM_019328	21.2047	12.7963	29.6132	2.3142	1.21052	0.000588284	0.012915
chr9	-	109627408	109897850	5	Efna5	NM_053903	147.611	88.8413	206.381	2.32303	1.21601	7.75628e-06	0.000364024
chr8	+	22910978	22913004	4	LOC100361444	NM_001271710	567.096	339.635	794.556	2.33944	1.22616	0.00229455	0.0348299
chr18	-	55857447	55958697	12	Ppargc1b	NM_176075	54.7713	32.7324	76.8102	2.34661	1.23058	3.23475e-07	2.335e-05
chr18	-	55104199	55125190	2	Synpo	NM_021695	45.0052	26.8309	63.1794	2.35472	1.23556	1.75436e-06	0.00010131
chr8	+	102801097	102809973	5	LOC501038	NM_001047965	97.5247	58.0115	137.038	2.36226	1.24016	1.51643e-10	2.61853e-08
chr5	-	139790974	139796149	15	Plk3	NM_022187	67.3794	40.0111	94.7476	2.36803	1.24369	2.34885e-09	3.31887e-07
chr1	-	226611404	226613312	2	LOC689065	NM_001109521	88.5313	52.2033	124.859	2.39179	1.25809	1.53582e-06	8.98624e-05
chr5	-	131353541	131370821	5	Cpt2	NM_012930	2487.07	1462.13	3512.01	2.40197	1.26422	6.43549e-29	5.69842e-26
chr1	-	24123624	24135887	7	Vnn3	NM_001109136	27.9566	16.3992	39.514	2.4095	1.26874	2.72046e-05	0.00109144
chr16	+	20812281	20835169	8	Slc25a42	NM_001127590	842.755	491.245	1194.27	2.4311	1.28161	4.00184e-22	2.65762e-19
chr10	-	38982881	39009871	10	Slc22a5	NM_019269	272.484	158.82	386.149	2.43137	1.28177	3.64151e-09	4.76074e-07
chr18	-	55751799	55765475	5	Slc26a2	NM_057127	14.3428	8.33304	20.3525	2.44239	1.28829	0.0034041	0.0464941
chr10	+	103537760	103561087	14	Acox1	NM_017340	4970.99	2878.95	7063.04	2.45334	1.29475	1.33168e-31	1.36057e-28
chr7	-	18805413	18811643	7	Angptl4	NM_199115	3619.96	2085.71	5154.21	2.4712	1.30521	3.30406e-19	1.46282e-16
chr19	+	57278676	57293046	5	Nudt7	NM_001108450	220.631	126.397	314.865	2.49107	1.31677	2.77547e-18	1.15199e-15
chr10	-	46087069	46088775	2	Rasd1	NM_001270954	113.832	65.2082	162.455	2.49133	1.31692	3.31671e-14	8.3118e-12
chr1	+	268842275	268846208	2	Marveld1	NM_001107590	806.502	459.22	1153.78	2.51249	1.32912	1.61547e-05	0.000698912
chr5	-	143259188	143288320	19	Ctps1	NM_001134873	37.775	21.2534	54.2965	2.55472	1.35316	9.44416e-05	0.00306693
chr7	-	118924872	118931634	3	Apol9a	NM_001025066	464.552	258.106	670.998	2.5997	1.37835	1.22461e-25	9.03626e-23
chr4	+	217213922	217324172	38	Cacna2d4	NM_001191751	96.3104	52.9409	139.68	2.63841	1.39967	3.20352e-11	6.25723e-09
chr17	-	25775675	25873301	2	Gfod1	NM_001170334	13.2204	7.18398	19.2569	2.68053	1.42252	0.00927558	0.0956508
chr8	-	112233631	112270036	11	Acpp	NM_020072	14.9342	8.11299	21.7553	2.68154	1.42306	0.00139797	0.0241141
chr1	-	224960135	224969658	5	Ccnd1	NM_171992	745.393	401.032	1089.75	2.71737	1.44221	3.71519e-15	1.12148e-12
chr12	+	43176425	43194139	12	Oas3	NM_001009493	11.2182	6.00233	16.4341	2.73796	1.4531	0.00271266	0.0392479
chr4	-	57350868	57353068	3	N5	NM_022857	20.4784	10.9438	30.013	2.74246	1.45547	3.69366e-05	0.00141309
chr5	-	138258627	138266420	9	Cyp4a3	NM_175760	6151.82	3273.77	9029.87	2.75825	1.46375	1.66686e-19	7.90686e-17
chr7	+	70468813	70486801	20	Avil	NM_024401	8.37439	4.45073	12.298	2.76315	1.46632	0.00843643	0.090068
chr16	-	7646579	7682624	17	Hacl1	NM_053493	4493.45	2372.78	6614.11	2.78749	1.47897	5.20846e-19	2.23157e-16
chr2	-	215340389	215366834	9	Tuft1	NM_001108948	11.5156	6.07596	16.9552	2.79053	1.48054	0.00126729	0.0224728
chr1	-	102674358	102675602	3	Fgf21	NM_130752	130.368	68.4337	192.301	2.81004	1.49059	0.00058763	0.012915
chr3	-	171846881	171875427	6	Zfp64	NM_001012093	125.095	65.4551	184.734	2.8223	1.49687	1.85996e-06	0.000106026
chr5	-	52998674	53019413	8	Pm20d2	NM_001107922	117.261	61.3477	173.175	2.82284	1.49715	1.42053e-08	1.52157e-06
chr20	-	32150985	32214979	17	Unc5b	NM_022207	50.901	26.2501	75.5518	2.87815	1.52514	1.87442e-05	0.000785362
chr10	+	58616223	58618838	3	Fbxo39	NM_001039018	10.2211	5.22195	15.2203	2.91467	1.54333	0.00302831	0.042518
chr5	+	163558668	163586206	16	Epha2	NM_001108977	505.639	257.954	753.323	2.92038	1.54616	1.55024e-12	3.37545e-10
chr15	-	110023433	110073159	10	Stk24	NM_001127494	24.0608	12.1932	35.9284	2.94658	1.55904	2.91182e-06	0.000153026
chr1	-	130820198	130829248	7	Arrdc4	NM_001047853	16.3236	8.24005	24.4072	2.96203	1.56658	6.03633e-05	0.00206635
chr12	-	44328561	44339738	8	Tbx3	NM_181638	130.337	65.7036	194.971	2.96743	1.56921	3.20599e-20	1.63777e-17
chr4	+	215195688	215208536	4	Cxcl12	NM_001033883	107.414	53.9374	160.89	2.98291	1.57672	0.000171188	0.00483769
chr15	-	61520775	61541280	9	Slc25a30	NM_001013187	590.06	296.193	883.928	2.9843	1.57739	1.42348e-10	2.52088e-08
chr10	+	65877569	65901277	9	Sarm1	NM_001105817	38.8866	19.4829	58.2902	2.99187	1.58105	5.75068e-09	7.00739e-07
chr13	+	116587120	116628801	23	Lamb3	NM_001100841	22.3077	11.1578	33.4576	2.9986	1.58429	6.58597e-05	0.00224295
chr2	+	256220310	256254953	3	Gimd1	NM_001113782	105.003	51.2523	158.753	3.09749	1.6311	0.00146093	0.024941
chr8	+	66038797	66084091	20	Tle3	NM_053400	226.2	108.286	344.113	3.17781	1.66803	2.39423e-27	1.98751e-24
chr5	+	144483331	144487332	2	Mycl	NM_001191763	21.6124	10.0077	33.2171	3.31915	1.73082	3.91224e-07	2.76396e-05
chr7	-	70815701	70817127	2	Inhbe	NM_031815	967.919	443.056	1492.78	3.36929	1.75244	2.2862e-19	1.04708e-16
chr3	+	48295427	48426566	16	Gpd2	NM_012736	176.804	80.2402	273.367	3.40686	1.76844	3.34848e-27	2.61615e-24
chr16	+	54469055	54560062	14	Mtmr7	NM_001107312	55.1879	24.6086	85.7671	3.48525	1.80126	1.21278e-07	1.00676e-05
chr2	+	197725439	197728572	2	RGD1560010	NM_001107685	35.1609	15.4641	54.8578	3.54743	1.82678	1.53776e-10	2.61853e-08
chr11	+	65429663	65524946	26	Sidt1	NM_001100653	21.0523	9.14508	32.9594	3.60406	1.84962	1.23276e-07	1.01699e-05
chr10	-	87187795	87203807	8	Krt23	NM_001008753	24.1196	10.2349	38.0043	3.71319	1.89266	1.34285e-08	1.45006e-06
chr12	+	24140328	24142467	2	Irs3	NM_032074	88.9821	37.5279	140.436	3.74218	1.90388	3.101e-07	2.25068e-05
chr6	-	118076666	118083477	3	Acot2	NM_138907	385.175	157.784	612.567	3.88232	1.95692	1.15185e-43	2.18556e-40
chr9	+	36267204	36294512	5	Lgsn	NM_181383	6.40475	2.62067	10.1888	3.88788	1.95898	0.00602017	0.0706359
chr2	+	159759665	159779874	3	Ccrn4l	NM_138526	5.81958	2.35622	9.28294	3.93977	1.97811	0.00337053	0.046152
chr7	-	12746092	12768092	9	Arid3a	NM_001108066	38.5172	15.1759	61.8585	4.0761	2.02719	6.05772e-06	0.00029472
chr4	+	230278003	230512009	8	Etv6	NM_001037353	149.9	57.7289	242.07	4.19323	2.06806	8.37034e-12	1.76468e-09
chr3	-	14320762	14334358	14	Crat	NM_001004085	890.02	342.095	1437.94	4.20335	2.07154	7.37517e-37	8.90518e-34
chr18	-	26284357	26371053	18	Epb41l4a	NM_001107397	6.11614	2.3153	9.91698	4.28323	2.0987	0.00327095	0.0450672
chr7	-	130080032	130089083	19	Cpt1b	NM_013200	43.0864	15.8059	70.367	4.45194	2.15444	1.8835e-16	6.94906e-14
chr7	+	141693055	141719909	31	Espl1	NM_001170602	4.66029	1.69083	7.62974	4.51243	2.1739	0.00782298	0.0855257
chr5	+	138283578	138297977	13	Cyp4a1	NM_175837	8147.7	2778.57	13516.8	4.86467	2.28234	4.64975e-50	1.23516e-46
chr8	+	129716223	129717910	1	Ackr2	NM_078621	20.6211	6.96538	34.2768	4.92102	2.29896	4.83278e-10	7.62948e-08
chr6	-	118021323	118026536	4	Acot4	NM_001109440	646.268	214.827	1077.71	5.01664	2.32672	2.75906e-70	1.83229e-66
chr10	-	88185494	88236092	29	Acly	NM_016987	7.13428	2.35893	11.9096	5.04874	2.33592	0.000600994	0.0130925
chr5	+	156503751	156504789	1	Paqr7	NM_001034081	616.811	203.114	1030.51	5.07355	2.34299	2.52092e-21	1.59442e-18
chr14	-	60376433	60395739	13	Slc34a2	NM_053380	603.647	195.692	1011.6	5.16935	2.36998	7.2725e-16	2.61063e-13
chr13	-	116559386	116560299	2	G0s2	NM_001009632	2689.82	863.08	4516.56	5.23307	2.38766	1.22804e-37	1.63108e-34
chr5	-	108985562	108999161	8	Plin2	NM_001007144	5468.69	1728.07	9209.31	5.32924	2.41393	8.52592e-94	1.13241e-89
chr11	+	86024802	86057811	7	Ehhadh	NM_133606	8955	2771.96	15138	5.46113	2.4492	4.43626e-43	7.36531e-40
chr2	+	132589873	132649581	5	Nceh1	NM_001127524	294.242	90.9685	497.516	5.4691	2.4513	4.75411e-31	4.51029e-28
chr4	-	30453697	30463700	11	Pdk4	NM_053551	3673.64	1102.91	6244.37	5.66174	2.50125	1.4486e-51	4.81006e-48
chr11	-	80454013	80477192	10	Bcl6	NM_001107084	386.245	113.905	658.585	5.78189	2.53154	0.000142967	0.00426715
chr4	-	224064528	224097591	18	Clstn3	NM_134376	3.87961	1.13094	6.62828	5.86086	2.55111	0.00940958	0.0965827
chr11	+	39154503	39171712	3	Kcnj15	NM_133321	14.3244	4.09517	24.5536	5.99574	2.58394	3.72066e-07	2.64266e-05
chr18	+	30579831	30662065	4	Pcdhga9	NM_001037158	3.09964	0.884946	5.31434	6.00527	2.58623	0.00971398	0.0991707
chr5	-	163890562	163894419	5	Slc25a34	NM_001013936	40.9825	11.5269	70.438	6.11075	2.61135	2.71691e-20	1.44344e-17
chr16	-	7553134	7608336	16	Colq	NM_019274	93.0695	25.6347	160.504	6.26122	2.64644	1.56509e-14	4.24235e-12
chr1	-	142435409	142442491	3	Pex11a	NM_053487	1195.58	307.366	2083.8	6.77954	2.76119	1.06941e-48	2.36732e-45
chr10	-	97459774	97480918	6	Slc16a6	NM_198760	38.3307	9.81309	66.8483	6.81216	2.76811	6.55332e-15	1.8922e-12
chr6	-	118006795	118012735	4	Acot3	NM_001108041	306.348	77.1964	535.5	6.93686	2.79428	2.11685e-40	3.12401e-37
chr5	-	21748178	21771668	7	Sdr16c6	NM_001109356	11.902	2.98393	20.8202	6.97744	2.8027	0.000373021	0.00901758
chr18	+	71255931	71590025	6	Zbtb7c	NM_001127375	6.8272	1.67832	11.9761	7.13576	2.83507	3.27768e-05	0.00128442
chr3	-	101408708	101433212	6	Prrg4	NM_001109203	69.6113	14.8861	124.337	8.35253	3.06221	1.9466e-20	1.12412e-17
chr7	+	120132150	120137599	2	Pdxp	NM_001135819	17.4152	3.06203	31.7684	10.375	3.37503	4.55154e-09	5.75748e-07
chr13	-	79174047	79198607	6	Tor3a	NM_001009683	268.657	42.4346	494.88	11.6622	3.54376	1.32787e-34	1.46974e-31
chr1	-	271603047	271615648	6	Scd1	NM_139192	14048.7	2163.09	25934.4	11.9895	3.5837	1.87036e-57	8.2807e-54
chr5	+	172918819	173003554	9	Acot7	NM_001146061	4.15076	0.512721	7.78879	15.1911	3.92515	5.61298e-05	0.00195161
chr6	-	118051122	118059101	5	Acot1	NM_031315	12.3109	1.27017	23.3516	18.3846	4.20042	1.02738e-08	1.17635e-06
chr15	-	48768909	48785192	7	Chrna2	NM_133420	4.82255	0.358268	9.28683	25.9215	4.69608	7.80474e-06	0.000365009

## Sheet: diffExp_res_all
Chromosome	strand	genomic start position	genomic end position	Exon Number	Gene Name	Accession Number	GENE_LENGTH	baseMean	baseMeanA	baseMeanB	foldChange	log2FoldChange	pval	padj
chr10	+	34355123	34356059	1	Olr1389	NM_001000000	936	0	0	0	NA	NA	NA	NA
chr10	+	34329600	34330536	1	Olr1387	NM_001000001	936	0	0	0	NA	NA	NA	NA
chr10	+	34517213	34518149	1	Olr1398	NM_001000002	936	0	0	0	NA	NA	NA	NA
chr10	+	34577211	34578147	1	Olr1401	NM_001000003	936	0	0	0	NA	NA	NA	NA
chr10	+	36303499	36304441	1	Olr1409	NM_001000004	942	0	0	0	NA	NA	NA	NA
chr10	+	36272136	36273060	1	Olr1407	NM_001000005	924	0	0	0	NA	NA	NA	NA
chr10	-	43927858	43928821	1	Olr1423	NM_001000006	963	0	0	0	NA	NA	NA	NA
chr10	-	43902265	43903210	1	Olr1422	NM_001000007	945	0	0	0	NA	NA	NA	NA
chr10	-	43833913	43869540	2	Olr1418	NM_001000008	945	0	0	0	NA	NA	NA	NA
chr10	-	43738858	43739788	1	Olr1416	NM_001000009	930	0	0	0	NA	NA	NA	NA
chr10	-	43964700	43965033	1	Olr1425	NM_001000010	333	0	0	0	NA	NA	NA	NA
chr10	+	43995608	43996524	1	Olr1428	NM_001000011	916	0	0	0	NA	NA	NA	NA
chr10	-	44061158	44062130	1	Olr1432	NM_001000012	972	0	0	0	NA	NA	NA	NA
chr10	+	44136990	44137911	1	Olr1434	NM_001000013	1842	0	0	0	NA	NA	NA	NA
chr10	-	44179192	44180113	1	Olr1436	NM_001000014	1842	0	0	0	NA	NA	NA	NA
chr10	+	44212194	44213115	1	Olr1437	NM_001000015	1842	0	0	0	NA	NA	NA	NA
chr10	+	44691262	44692183	1	Olr1439	NM_001000016	1842	0	0	0	NA	NA	NA	NA
chr10	-	44729135	44730056	1	Olr1440	NM_001000017	921	0	0	0	NA	NA	NA	NA
chr10	+	44309646	44310567	1	Olr1443	NM_001000018	921	0	0	0	NA	NA	NA	NA
chr10	+	44391402	44392321	1	Olr1448	NM_001000019	919	0	0	0	NA	NA	NA	NA
chr10	+	44490658	44491651	1	Olr1454	NM_001000020	993	0	0	0	NA	NA	NA	NA
chr10	+	44534584	44535511	1	Olr1458	NM_001000021	927	0	0	0	NA	NA	NA	NA
chr10	+	44916887	44917814	1	Olr1461	NM_001000022	927	0	0	0	NA	NA	NA	NA
chr10	-	45696570	45697530	1	Olr1463	NM_001000023	960	0	0	0	NA	NA	NA	NA
chr10	+	59662427	59663372	1	Olr1466	NM_001000024	945	0	0	0	NA	NA	NA	NA
chr10	+	59673325	59674279	1	Olr1467	NM_001000025	954	0	0	0	NA	NA	NA	NA
chr10	+	59662427	59973589	2	Olr1482	NM_001000026	945	0	0	0	NA	NA	NA	NA
chr10	-	59888170	59889109	1	Olr1475	NM_001000027	1878	0	0	0	NA	NA	NA	NA
chr10	-	60011971	60012910	1	Olr1485	NM_001000028	939	0	0	0	NA	NA	NA	NA
chr10	-	60164938	60165877	1	Olr1492	NM_001000029	939	0	0	0	NA	NA	NA	NA
chr10	-	60279690	60280629	1	Olr1498	NM_001000030	939	0	0	0	NA	NA	NA	NA
chr10	-	60310942	60311878	1	Olr1499	NM_001000031	936	0	0	0	NA	NA	NA	NA
chr10	+	60548568	60549636	2	Olr1505	NM_001000032	935	0	0	0	NA	NA	NA	NA
chr10	-	60601362	60602307	1	Olr1507	NM_001000033	945	0	0	0	NA	NA	NA	NA
chr10	+	60707667	60708615	1	Olr1511	NM_001000034	948	0	0	0	NA	NA	NA	NA
chr10	+	60765094	60766033	1	Olr1513	NM_001000035	939	0	0	0	NA	NA	NA	NA
chr10	-	60776392	60777337	1	Olr1514	NM_001000036	945	0	0	0	NA	NA	NA	NA
chr10	+	60891354	60892290	1	Olr1519	NM_001000037	936	0	0	0	NA	NA	NA	NA
chr10	+	60797276	60798248	1	Olr1516	NM_001000038	1944	0	0	0	NA	NA	NA	NA
chr10	+	74915497	74916433	1	Olr1521	NM_001000039	936	0	0	0	NA	NA	NA	NA
chr10	+	74911396	74912332	1	Olr1522	NM_001000040	936	0	0	0	NA	NA	NA	NA
chr11	+	88456471	88457413	1	Olr1570	NM_001000041	942	0	0	0	NA	NA	NA	NA
chr11	-	88370582	88371521	1	Olr1569	NM_001000042	939	0	0	0	NA	NA	NA	NA
chr11	+	88071322	88072261	1	Olr1567	NM_001000043	1878	0	0	0	NA	NA	NA	NA
chr11	+	88243229	88244176	2	Olr1566	NM_001000044	942	0	0	0	NA	NA	NA	NA
chr11	+	47054502	47055414	1	Olr1564	NM_001000045	912	0	0	0	NA	NA	NA	NA
chr11	+	47022563	47023493	1	Olr1563	NM_001000046	930	0	0	0	NA	NA	NA	NA
chr11	+	47022563	47023493	1	Olr1562	NM_001000047	930	0	0	0	NA	NA	NA	NA
chr11	+	47054502	47055432	1	Olr1561	NM_001000048	930	0	0	0	NA	NA	NA	NA
chr11	+	46884178	46885132	1	Olr1559	NM_001000049	954	0	0	0	NA	NA	NA	NA
chr11	-	46801979	46802909	1	Olr1557	NM_001000050	930	0	0	0	NA	NA	NA	NA
chr11	-	46745935	46746865	1	Olr1553	NM_001000051	930	0	0	0	NA	NA	NA	NA
chr11	+	46673691	46674609	1	Olr1549	NM_001000052	918	0	0	0	NA	NA	NA	NA
chr7	+	3410035	3410974	1	Olr875	NM_001000054	939	0	0	0	NA	NA	NA	NA
chr7	-	3734734	3735673	1	Olr880	NM_001000055	939	0	0	0	NA	NA	NA	NA
chr7	-	3788798	3789734	1	Olr881	NM_001000056	936	0	0	0	NA	NA	NA	NA
chr11	-	26693083	26694028	1	Olr901	NM_001000057	945	0	0	0	NA	NA	NA	NA
chr7	-	5233844	5234804	1	Olr898	NM_001000058	960	0	0	0	NA	NA	NA	NA
chr7	-	5184682	5185633	1	Olr896	NM_001000059	951	0	0	0	NA	NA	NA	NA
chr7	-	5096897	5097836	1	Olr892	NM_001000060	939	0	0	0	NA	NA	NA	NA
chr7	-	4172533	4173496	1	Olr889	NM_001000061	963	0	0	0	NA	NA	NA	NA
chr7	-	9795001	9795970	1	Olr1072	NM_001000062	969	0	0	0	NA	NA	NA	NA
chr7	-	9757295	9758237	1	Olr1071	NM_001000063	942	0	0	0	NA	NA	NA	NA
chr7	+	9438075	9439014	1	Olr1063	NM_001000064	939	0	0	0	NA	NA	NA	NA
chr7	-	9237466	9238429	1	Olr1061	NM_001000065	963	0	0	0	NA	NA	NA	NA
chr7	+	16561492	16562431	1	Olr1058	NM_001000066	939	0.117635	0.235271	0	0	#NAME?	1	1
chr7	+	16624357	16625302	1	Olr1055	NM_001000067	945	0	0	0	NA	NA	NA	NA
chr7	-	7719330	7720253	1	Olr1024	NM_001000068	923	0	0	0	NA	NA	NA	NA
chr7	-	7410098	7411058	1	Olr1020	NM_001000069	960	0	0	0	NA	NA	NA	NA
chr7	-	7285806	7286730	1	Olr1016	NM_001000070	924	0	0	0	NA	NA	NA	NA
chr7	+	7165983	7166922	1	Olr1012	NM_001000071	939	0	0	0	NA	NA	NA	NA
chr7	+	16571901	16572840	1	Olr1057	NM_001000072	939	0	0	0	NA	NA	NA	NA
chr7	+	7675639	7676582	1	Olr951	NM_001000073	943	0	0	0	NA	NA	NA	NA
chr7	-	7636797	7637736	2	Olr952	NM_001000074	938	0	0	0	NA	NA	NA	NA
chr7	+	6204172	6205123	1	Olr1006	NM_001000075	951	0	0	0	NA	NA	NA	NA
chr7	+	6175492	6176437	1	Olr1007	NM_001000076	945	0	0	0	NA	NA	NA	NA
chr7	-	6991955	6992892	2	Olr1000	NM_001000077	936	0	0	0	NA	NA	NA	NA
chr13	-	96152146	96153079	1	Olr1579	NM_001000078	933	0	0	0	NA	NA	NA	NA
chr13	+	96226412	96227354	1	Olr1582	NM_001000079	942	0	0	0	NA	NA	NA	NA
chr13	+	96239741	96240683	1	Olr1583	NM_001000080	942	0	0	0	NA	NA	NA	NA
chr13	+	96618116	96619061	1	Olr1584	NM_001000081	945	1.28645	0.906913	1.66599	1.83699	0.877342	0.611418	0.986977
chr13	+	96663614	96664568	1	Olr1588	NM_001000082	954	0.346037	0	0.692074	Inf	Inf	0.424937	0.869101
chr13	+	96685798	96686737	1	Olr1589	NM_001000083	939	0	0	0	NA	NA	NA	NA
chr13	-	96727284	96728208	1	Olr1592	NM_001000084	924	0	0	0	NA	NA	NA	NA
chr13	+	96743126	96744074	1	Olr1593	NM_001000085	948	0	0	0	NA	NA	NA	NA
chr13	+	96897150	96898080	1	Olr1600	NM_001000086	930	0	0	0	NA	NA	NA	NA
chr13	+	96932847	96933801	1	Olr1601	NM_001000087	954	0	0	0	NA	NA	NA	NA
chr15	-	16165179	16166148	1	Olr1605	NM_001000088	969	0	0	0	NA	NA	NA	NA
chr15	-	30704832	30705759	1	Olr1624	NM_001000089	927	0	0	0	NA	NA	NA	NA
chr15	-	30781448	30782420	1	Olr1626	NM_001000090	972	0	0	0	NA	NA	NA	NA
chr15	+	30813945	30814920	1	Olr1627	NM_001000091	975	0	0	0	NA	NA	NA	NA
chr15	-	30865221	30866193	1	Olr1630	NM_001000092	972	0	0	0	NA	NA	NA	NA
chr15	-	30927154	30928108	1	Olr1608	NM_001000093	954	0	0	0	NA	NA	NA	NA
chr15	-	31002766	31003693	1	Olr1610	NM_001000094	927	0	0	0	NA	NA	NA	NA
chr15	-	31066248	31067190	1	Olr1612	NM_001000096	942	0	0	0	NA	NA	NA	NA
chr15	+	31338430	31339405	1	Olr1620	NM_001000097	975	0	0	0	NA	NA	NA	NA
chr15	-	32616397	32617339	1	Olr1640	NM_001000099	942	0	0	0	NA	NA	NA	NA
chr15	-	32665835	32666792	1	Olr1641	NM_001000100	957	0	0	0	NA	NA	NA	NA
chr15	-	32740565	32741498	1	Olr1644	NM_001000101	933	0	0	0	NA	NA	NA	NA
chr15	-	32766025	32767030	1	Olr1645	NM_001000102	1005	0	0	0	NA	NA	NA	NA
chr15	-	36736033	36736978	1	Olr1646	NM_001000103	945	0	0	0	NA	NA	NA	NA
chr17	+	4923921	4924869	1	Olr1653	NM_001000104	948	0	0	0	NA	NA	NA	NA
chr17	-	58467098	58468019	1	Olr1658	NM_001000105	921	0	0	0	NA	NA	NA	NA
chr17	-	57801109	57802048	1	Olr1660	NM_001000106	939	0	0	0	NA	NA	NA	NA
chr17	+	57783015	57783969	1	Olr1662	NM_001000107	954	0	0	0	NA	NA	NA	NA
chr19	-	38498264	38499203	1	Olr1666	NM_001000108	939	0	0	0	NA	NA	NA	NA
chr1	+	236633969	236634905	1	Olr387	NM_001000109	936	0	0	0	NA	NA	NA	NA
chr1	+	71833478	71834432	1	Olr3	NM_001000110	954	0	0	0	NA	NA	NA	NA
chr1	+	71850024	71850963	1	Olr4	NM_001000111	939	0	0	0	NA	NA	NA	NA
chr1	+	71860650	71861559	1	Olr5	NM_001000112	909	0	0	0	NA	NA	NA	NA
chr1	-	71891244	71892189	1	Olr8	NM_001000113	945	0	0	0	NA	NA	NA	NA
chrX	+	95233090	95234038	1	Olr11	NM_001000114	948	0	0	0	NA	NA	NA	NA
chrX	+	95227378	95228326	1	Olr10	NM_001000115	948	0	0	0	NA	NA	NA	NA
chr1	-	155904496	155905423	1	Olr13	NM_001000116	1854	0	0	0	NA	NA	NA	NA
chr1	-	156215802	156216762	1	Olr19	NM_001000117	1920	0	0	0	NA	NA	NA	NA
chr1	+	156265702	156266695	1	Olr20	NM_001000118	1986	0	0	0	NA	NA	NA	NA
chr1	+	156372577	156373573	1	Olr23	NM_001000119	996	0	0	0	NA	NA	NA	NA
chr1	+	156533563	156534493	1	Olr30	NM_001000120	930	0	0	0	NA	NA	NA	NA
chr1	+	170909945	170910865	1	Olr35	NM_001000121	920	14.8373	13.6704	16.0043	1.17073	0.227406	0.409583	0.859746
chr1	+	173971893	173972847	1	Olr48	NM_001000122	954	0	0	0	NA	NA	NA	NA
chr1	-	173954681	173955641	1	Olr47	NM_001000123	960	0	0	0	NA	NA	NA	NA
chr1	+	173933532	173934486	1	Olr45	NM_001000124	954	0	0	0	NA	NA	NA	NA
chr1	-	173917268	173918216	1	Olr44	NM_001000125	948	0	0	0	NA	NA	NA	NA
chr1	+	173846399	173847341	1	Olr41	NM_001000126	942	0	0	0	NA	NA	NA	NA
chr1	-	173791265	173792216	1	Olr40	NM_001000127	951	0	0	0	NA	NA	NA	NA
chr1	-	173773513	173774503	1	Olr39	NM_001000128	990	0	0	0	NA	NA	NA	NA
chr1	-	174057702	174061341	2	Olr62	NM_001000129	963	0	0	0	NA	NA	NA	NA
chr1	+	174120903	174236013	2	Olr56	NM_001000130	927	0	0	0	NA	NA	NA	NA
chr1	-	174190054	174191029	1	Olr50	NM_001000131	975	0	0	0	NA	NA	NA	NA
chr1	-	174204247	174205174	1	Olr49	NM_001000132	927	0	0	0	NA	NA	NA	NA
chr1	+	174311507	174312476	1	Olr68	NM_001000133	969	0	0	0	NA	NA	NA	NA
chr1	+	174371238	174372183	1	Olr74	NM_001000134	945	0	0	0	NA	NA	NA	NA
chr1	+	174411846	174412794	1	Olr78	NM_001000135	948	0	0	0	NA	NA	NA	NA
chr1	+	174500662	174501601	1	Olr83	NM_001000136	939	0	0	0	NA	NA	NA	NA
chr1	+	174515335	174516319	1	Olr84	NM_001000137	984	0	0	0	NA	NA	NA	NA
chr1	+	174522198	174523134	1	Olr85	NM_001000138	936	0	0	0	NA	NA	NA	NA
chr1	+	174620376	174621324	1	Olr91	NM_001000139	948	0	0	0	NA	NA	NA	NA
chr1	-	174628151	174629096	1	Olr92	NM_001000140	945	0	0	0	NA	NA	NA	NA
chr1	-	174636814	174637759	1	Olr93	NM_001000141	945	0	0	0	NA	NA	NA	NA
chr1	+	174690695	174691643	1	Olr98	NM_001000143	948	0	0	0	NA	NA	NA	NA
chr1	+	174744384	174745335	1	Olr103	NM_001000144	951	0	0	0	NA	NA	NA	NA
chr1	-	174756122	174757082	1	Olr104	NM_001000145	960	0	0	0	NA	NA	NA	NA
chr1	-	174770000	174770948	1	Olr105	NM_001000146	948	0	0	0	NA	NA	NA	NA
chr1	-	174780539	174781511	1	Olr106	NM_001000147	972	0	0	0	NA	NA	NA	NA
chr1	+	174792990	174793944	1	Olr107	NM_001000148	954	0	0	0	NA	NA	NA	NA
chr1	+	174807848	174808790	1	Olr108	NM_001000149	942	0	0	0	NA	NA	NA	NA
chr1	+	174860881	174861844	1	Olr112	NM_001000150	963	0	0	0	NA	NA	NA	NA
chr1	-	174870482	174871424	1	Olr113	NM_001000151	942	0	0	0	NA	NA	NA	NA
chr1	-	174892393	174893347	1	Olr115	NM_001000152	954	0	0	0	NA	NA	NA	NA
chr1	-	174960403	174961357	1	Olr119	NM_001000153	954	0	0	0	NA	NA	NA	NA
chr1	-	174968335	174969280	1	Olr120	NM_001000154	945	0	0	0	NA	NA	NA	NA
chr1	-	174979302	174980256	1	Olr121	NM_001000155	954	0	0	0	NA	NA	NA	NA
chr1	+	174990531	174991482	1	Olr122	NM_001000156	951	0	0	0	NA	NA	NA	NA
chr1	-	175012984	175013932	1	Olr124	NM_001000157	948	0	0	0	NA	NA	NA	NA
chr1	-	175042945	175043896	1	Olr126	NM_001000158	951	0	0	0	NA	NA	NA	NA
chr1	-	175087437	175088400	1	Olr128	NM_001000159	963	0	0	0	NA	NA	NA	NA
chr1	+	175283896	175284850	1	Olr136	NM_001000160	954	0	0	0	NA	NA	NA	NA
chr1	+	175335369	175336317	1	Olr139	NM_001000161	948	0	0	0	NA	NA	NA	NA
chr1	+	175358546	175359494	1	Olr140	NM_001000162	948	0	0	0	NA	NA	NA	NA
chr1	+	175390067	175391006	1	Olr143	NM_001000163	939	0	0	0	NA	NA	NA	NA
chr1	-	175397137	175398082	1	Olr144	NM_001000164	945	0	0	0	NA	NA	NA	NA
chr1	+	175452980	175453952	1	Olr148	NM_001000165	972	0	0	0	NA	NA	NA	NA
chr1	-	175512205	175513156	1	Olr149	NM_001000166	951	0	0	0	NA	NA	NA	NA
chr1	+	175702364	175703339	1	Olr153	NM_001000167	975	0	0	0	NA	NA	NA	NA
chr1	+	175727757	175728729	1	Olr155	NM_001000168	1944	0	0	0	NA	NA	NA	NA
chr1	+	176553535	176554525	1	Olr157	NM_001000169	2970	0	0	0	NA	NA	NA	NA
chr1	+	175782776	175783742	1	Olr159	NM_001000170	1932	0	0	0	NA	NA	NA	NA
chr1	+	175834474	175835440	1	Olr163	NM_001000171	1932	0	0	0	NA	NA	NA	NA
chr1	-	175905402	175906371	1	Olr165	NM_001000172	1938	0	0	0	NA	NA	NA	NA
chr1	-	175936950	175937910	1	Olr167	NM_001000173	1920	0	0	0	NA	NA	NA	NA
chr1	+	175976533	175977493	1	Olr168	NM_001000174	960	0	0	0	NA	NA	NA	NA
chr1	-	175996607	175997573	1	Olr170	NM_001000175	966	0	0	0	NA	NA	NA	NA
chr1	+	176035348	176036299	1	Olr171	NM_001000176	951	0	0	0	NA	NA	NA	NA
chr1	-	176043061	176044018	1	Olr172	NM_001000177	957	0	0	0	NA	NA	NA	NA
chr1	-	176094893	176095850	1	Olr176	NM_001000178	957	0	0	0	NA	NA	NA	NA
chr9	+	100918292	100919231	1	Olr178	NM_001000179	939	0	0	0	NA	NA	NA	NA
chr1	-	176868261	176869212	1	Olr180	NM_001000180	951	0	0	0	NA	NA	NA	NA
chr1	-	176904651	176905593	1	Olr183	NM_001000181	942	0	0	0	NA	NA	NA	NA
chr1	-	176915703	176916657	1	Olr184	NM_001000182	954	0	0	0	NA	NA	NA	NA
chr1	+	176925561	176926515	1	Olr185	NM_001000183	954	0	0	0	NA	NA	NA	NA
chr1	+	176966520	176967462	1	Olr189	NM_001000184	942	0	0	0	NA	NA	NA	NA
chr1	+	176980797	176981745	1	Olr190	NM_001000185	948	0	0	0	NA	NA	NA	NA
chr1	-	177019243	177020185	1	Olr193	NM_001000186	942	0	0	0	NA	NA	NA	NA
chr1	-	177087190	177088141	1	Olr196	NM_001000187	951	0	0	0	NA	NA	NA	NA
chr1	-	177099404	177100358	1	Olr197	NM_001000188	954	0	0	0	NA	NA	NA	NA
chr1	+	177155184	177156150	1	Olr200	NM_001000189	966	0	0	0	NA	NA	NA	NA
chr1	-	177181895	177182840	1	Olr201	NM_001000190	945	0	0	0	NA	NA	NA	NA
chr1	-	180172054	180173002	1	Olr203	NM_001000191	948	0	0	0	NA	NA	NA	NA
chr2	+	4837922	4838870	1	Olr204	NM_001000192	948	0	0	0	NA	NA	NA	NA
chr2	+	4779380	4780328	1	Olr206	NM_001000193	948	0	0	0	NA	NA	NA	NA
chr1	-	177746850	177747801	1	Olr208	NM_001000194	951	0	0	0	NA	NA	NA	NA
chr1	+	177800339	177801290	1	Olr210	NM_001000195	951	0	0	0	NA	NA	NA	NA
chr1	-	177804702	177805629	1	Olr211	NM_001000196	927	0	0	0	NA	NA	NA	NA
chr1	+	177867950	177868901	1	Olr214	NM_001000197	951	0	0	0	NA	NA	NA	NA
chr1	+	177891431	177892379	1	Olr215	NM_001000198	948	0	0	0	NA	NA	NA	NA
chr1	-	177919177	177920128	1	Olr217	NM_001000199	951	0	0	0	NA	NA	NA	NA
chr1	-	177993264	177994188	1	Olr221	NM_001000200	924	0	0	0	NA	NA	NA	NA
chr1	-	178013691	178014624	1	Olr222	NM_001000201	933	0	0	0	NA	NA	NA	NA
chr1	-	178032390	178033341	1	Olr223	NM_001000202	951	0	0	0	NA	NA	NA	NA
chr1	+	155165137	155166091	1	Olr227	NM_001000203	1908	0	0	0	NA	NA	NA	NA
chr1	-	177698758	177699703	1	Olr229	NM_001000204	1890	0	0	0	NA	NA	NA	NA
chr1	+	178183989	178184943	1	Olr230	NM_001000205	954	0	0	0	NA	NA	NA	NA
chr1	+	178193085	178194033	1	Olr231	NM_001000206	948	0	0	0	NA	NA	NA	NA
chr1	-	178213425	178214373	1	Olr233	NM_001000207	948	0	0	0	NA	NA	NA	NA
chr1	+	178279342	178280287	1	Olr234	NM_001000208	945	0	0	0	NA	NA	NA	NA
chr1	+	179048449	179049388	1	Olr235	NM_001000209	939	0	0	0	NA	NA	NA	NA
chr1	-	179055442	179056387	1	Olr237	NM_001000210	945	0	0	0	NA	NA	NA	NA
chr1	-	179072434	179073373	1	Olr239	NM_001000211	939	0	0	0	NA	NA	NA	NA
chr1	+	179153426	179154359	1	Olr242	NM_001000213	933	0	0	0	NA	NA	NA	NA
chr1	-	179210502	179211447	1	Olr244	NM_001000214	945	0	0	0	NA	NA	NA	NA
chr1	+	179238393	179239377	1	Olr245	NM_001000215	984	0	0	0	NA	NA	NA	NA
chr1	+	179260362	179261301	1	Olr246	NM_001000216	939	0	0	0	NA	NA	NA	NA
chr1	+	179279144	179280089	1	Olr247	NM_001000217	945	0	0	0	NA	NA	NA	NA
chr1	-	179364313	179365258	1	Olr251	NM_001000218	945	0	0	0	NA	NA	NA	NA
chr1	-	179390643	179391615	1	Olr252	NM_001000219	972	0	0	0	NA	NA	NA	NA
chr1	+	179614049	179614994	1	Olr263	NM_001000220	945	0	0	0	NA	NA	NA	NA
chr1	-	179604374	179605331	1	Olr262	NM_001000221	957	0	0	0	NA	NA	NA	NA
chr1	-	179556219	179557161	1	Olr259	NM_001000222	942	0	0	0	NA	NA	NA	NA
chr1	-	180378258	180379194	1	Olr285	NM_001000223	936	0	0	0	NA	NA	NA	NA
chr1	-	180444623	180445604	1	Olr282	NM_001000224	981	0	0	0	NA	NA	NA	NA
chr1	-	180120830	180121775	1	Olr281	NM_001000225	1890	0	0	0	NA	NA	NA	NA
chr1	-	180116733	180117679	2	Olr279	NM_001000226	945	0	0	0	NA	NA	NA	NA
chr1	+	179891764	179892709	1	Olr276	NM_001000227	945	0	0	0	NA	NA	NA	NA
chr1	+	179713668	179792767	2	Olr267	NM_001000228	945	0	0	0	NA	NA	NA	NA
chr1	+	179791822	179792767	1	Olr270	NM_001000229	945	0	0	0	NA	NA	NA	NA
chr1	+	179812343	179813288	1	Olr272	NM_001000230	945	0	0	0	NA	NA	NA	NA
chr1	-	219592777	219593734	1	Olr288	NM_001000231	957	0	0	0	NA	NA	NA	NA
chr1	-	219917107	219918025	1	Olr292	NM_001000232	918	0	0	0	NA	NA	NA	NA
chr1	-	219840417	219841350	1	Olr295	NM_001000233	933	0	0	0	NA	NA	NA	NA
chr1	-	219869514	219870438	1	Olr297	NM_001000234	924	0	0	0	NA	NA	NA	NA
chr1	-	219936291	219937221	1	Olr299	NM_001000236	930	0	0	0	NA	NA	NA	NA
chr1	+	219964818	219965742	1	Olr300	NM_001000237	924	0	0	0	NA	NA	NA	NA
chr1	+	219995478	219996411	1	Olr302	NM_001000238	933	0	0	0	NA	NA	NA	NA
chr1	-	220018977	220019901	1	Olr303	NM_001000239	924	0	0	0	NA	NA	NA	NA
chr1	+	220091535	220092534	2	Olr305	NM_001000240	933	0	0	0	NA	NA	NA	NA
chr1	+	176504647	176505580	1	Olr307	NM_001000241	933	0	0	0	NA	NA	NA	NA
chr1	+	220229218	220230151	1	Olr309	NM_001000242	933	0	0	0	NA	NA	NA	NA
chr1	+	220345991	220346924	1	Olr315	NM_001000243	933	0	0	0	NA	NA	NA	NA
chr1	-	235539044	235539977	1	Olr321	NM_001000244	933	0	0	0	NA	NA	NA	NA
chr1	-	235587343	235588279	1	Olr323	NM_001000245	936	0	0	0	NA	NA	NA	NA
chr1	-	235600404	235601340	1	Olr324	NM_001000246	936	0	0	0	NA	NA	NA	NA
chr1	-	235609178	235610123	1	Olr325	NM_001000247	945	0	0	0	NA	NA	NA	NA
chr1	-	235620905	235621859	1	Olr326	NM_001000248	954	0	0	0	NA	NA	NA	NA
chr1	-	235672960	235673926	1	Olr327	NM_001000249	966	0	0	0	NA	NA	NA	NA
chr1	+	236614912	236615872	1	Olr332	NM_001000250	960	0	0	0	NA	NA	NA	NA
chr1	+	235743769	235744711	1	Olr329	NM_001000251	942	0	0	0	NA	NA	NA	NA
chr1	+	236265690	236266629	1	Olr338	NM_001000252	939	0	0	0	NA	NA	NA	NA
chr1	+	236904465	236905410	1	Olr340	NM_001000253	945	0	0	0	NA	NA	NA	NA
chr1	-	236952485	236953428	1	Olr343	NM_001000254	943	0	0	0	NA	NA	NA	NA
chr1	+	236997763	236998690	1	Olr346	NM_001000255	927	0	0	0	NA	NA	NA	NA
chr1	+	237155759	237156683	1	Olr352	NM_001000256	924	0	0	0	NA	NA	NA	NA
chr1	+	237201625	237202573	1	Olr357	NM_001000257	948	0	0	0	NA	NA	NA	NA
chr1	+	237586425	237587367	1	Olr371	NM_001000258	942	0	0	0	NA	NA	NA	NA
chr1	+	237742163	237743123	1	Olr375	NM_001000259	960	0.0895669	0.179134	0	0	#NAME?	1	1
chr1	+	237766957	237767905	1	Olr376	NM_001000260	948	0	0	0	NA	NA	NA	NA
chr1	-	237813019	237813955	1	Olr379	NM_001000261	936	0	0	0	NA	NA	NA	NA
chr1	-	237904167	237905115	1	Olr383	NM_001000262	948	0	0	0	NA	NA	NA	NA
chr1	+	237950399	237951350	1	Olr384	NM_001000263	951	0	0	0	NA	NA	NA	NA
chr1	+	151950139	151951078	1	Olr1768	NM_001000264	939	0	0	0	NA	NA	NA	NA
chr20	-	384746	385685	1	Olr1671	NM_001000266	939	0	0	0	NA	NA	NA	NA
chr20	-	316209	317148	1	Olr1668	NM_001000267	939	0	0	0	NA	NA	NA	NA
chr20	-	405531	406470	1	Olr1673	NM_001000268	939	0	0	0	NA	NA	NA	NA
chr20	-	540049	540988	1	Olr1683	NM_001000269	939	0	0	0	NA	NA	NA	NA
chr20	+	556459	557401	1	Olr1684	NM_001000270	942	0	0	0	NA	NA	NA	NA
chr20	+	997386	998325	1	Olr1704	NM_001000271	1878	0	0	0	NA	NA	NA	NA
chr20	-	844753	845719	1	Olr1695	NM_001000272	966	0	0	0	NA	NA	NA	NA
chr20	-	778788	779760	1	Olr1691	NM_001000273	972	0	0	0	NA	NA	NA	NA
chr20	-	759974	760946	1	Olr1690	NM_001000274	972	0	0	0	NA	NA	NA	NA
chr20	+	719115	720120	1	Olr1688	NM_001000275	2010	0	0	0	NA	NA	NA	NA
chr20	+	1046108	1047023	1	Olr1708	NM_001000276	1830	0	0	0	NA	NA	NA	NA
chr20	-	3646389	3647312	1	Olr1724	NM_001000277	923	0	0	0	NA	NA	NA	NA
chr20	+	3692455	3693409	1	Olr1730	NM_001000279	954	0	0	0	NA	NA	NA	NA
chr3	-	79281067	79281997	1	Olr439	NM_001000281	930	0	0	0	NA	NA	NA	NA
chr3	-	79298462	79299410	4	Olr440	NM_001000282	945	0	0	0	NA	NA	NA	NA
chr3	-	79319565	79320510	1	Olr441	NM_001000283	945	0	0	0	NA	NA	NA	NA
chr3	-	79329980	79330928	1	Olr442	NM_001000284	948	0	0	0	NA	NA	NA	NA
chr3	+	79477235	79478180	1	Olr443	NM_001000285	1890	0	0	0	NA	NA	NA	NA
chr3	+	79578988	79579933	1	Olr447	NM_001000286	945	0	0	0	NA	NA	NA	NA
chr3	-	79607285	79608242	1	Olr448	NM_001000287	957	0	0	0	NA	NA	NA	NA
chr3	-	79616505	79617444	1	Olr450	NM_001000288	939	0	0	0	NA	NA	NA	NA
chr3	+	79657461	79658406	1	Olr453	NM_001000289	945	0	0	0	NA	NA	NA	NA
chr3	+	79683244	79684180	1	Olr454	NM_001000290	936	0	0	0	NA	NA	NA	NA
chr3	-	79691901	79692837	1	Olr455	NM_001000291	936	0	0	0	NA	NA	NA	NA
chr3	+	79730187	79731126	1	Olr458	NM_001000292	939	0	0	0	NA	NA	NA	NA
chr3	-	79746211	79747141	1	Olr459	NM_001000293	930	0	0	0	NA	NA	NA	NA
chr3	+	79773001	79773937	1	Olr461	NM_001000294	936	0	0	0	NA	NA	NA	NA
chr3	-	79794250	79795183	1	Olr462	NM_001000295	933	0	0	0	NA	NA	NA	NA
chr3	+	79818265	79819219	1	Olr464	NM_001000296	954	0	0	0	NA	NA	NA	NA
chr3	+	79823101	79824049	1	Olr465	NM_001000297	948	0	0	0	NA	NA	NA	NA
chr3	+	79842977	79843913	1	Olr466	NM_001000298	936	0	0	0	NA	NA	NA	NA
chr3	+	79876455	79877379	1	Olr469	NM_001000299	924	0	0	0	NA	NA	NA	NA
chr3	+	79903704	79904679	1	Olr470	NM_001000300	975	0	0	0	NA	NA	NA	NA
chr3	+	79920907	79921891	1	Olr472	NM_001000301	984	0	0	0	NA	NA	NA	NA
chr3	+	79934710	79935643	1	Olr473	NM_001000302	933	0	0	0	NA	NA	NA	NA
chr3	-	79968747	79969713	1	Olr476	NM_001000303	966	0	0	0	NA	NA	NA	NA
chr3	+	79994439	79995399	1	Olr477	NM_001000304	960	0	0	0	NA	NA	NA	NA
chr3	-	80024851	80025793	1	Olr479	NM_001000305	942	0	0	0	NA	NA	NA	NA
chr3	-	80091315	80092263	1	Olr484	NM_001000306	1896	0	0	0	NA	NA	NA	NA
chr3	-	80195859	80196810	1	Olr485	NM_001000307	951	0	0	0	NA	NA	NA	NA
chr3	-	80233050	80233977	1	Olr488	NM_001000308	927	0	0	0	NA	NA	NA	NA
chr3	-	80305293	80306235	1	Olr493	NM_001000309	1884	0	0	0	NA	NA	NA	NA
chr3	-	80320703	80321651	1	Olr495	NM_001000310	1896	0	0	0	NA	NA	NA	NA
chr3	-	80407423	80408365	1	Olr502	NM_001000311	942	0	0	0	NA	NA	NA	NA
chr3	-	80530737	80531670	1	Olr510	NM_001000312	933	0	0	0	NA	NA	NA	NA
chr3	-	80585278	80586214	1	Olr513	NM_001000313	936	0	0	0	NA	NA	NA	NA
chr3	-	80601657	80602599	1	Olr514	NM_001000314	942	0	0	0	NA	NA	NA	NA
chr3	+	80640956	80641922	1	Olr515	NM_001000315	966	0	0	0	NA	NA	NA	NA
chr3	-	80665058	80665994	1	Olr516	NM_001000316	936	0	0	0	NA	NA	NA	NA
chr3	+	80705549	80706542	1	Olr517	NM_001000317	993	0	0	0	NA	NA	NA	NA
chr3	-	80991896	80992865	1	Olr519	NM_001000318	969	0	0	0	NA	NA	NA	NA
chr3	-	81124706	81125648	1	Olr528	NM_001000319	942	0	0	0	NA	NA	NA	NA
chr3	-	81281208	81282147	1	Olr539	NM_001000320	939	0	0	0	NA	NA	NA	NA
chr3	-	81322074	81323013	1	Olr540	NM_001000321	939	0	0	0	NA	NA	NA	NA
chr3	-	81641021	81641960	1	Olr550	NM_001000322	1878	0	0	0	NA	NA	NA	NA
chr3	+	81915419	81916370	1	Olr554	NM_001000323	951	0	0	0	NA	NA	NA	NA
chr3	+	82099336	82100257	1	Olr558	NM_001000324	921	0	0	0	NA	NA	NA	NA
chr3	+	82131758	82132739	1	Olr560	NM_001000325	981	0	0	0	NA	NA	NA	NA
chr3	-	82291951	82292878	1	Olr567	NM_001000326	927	0	0	0	NA	NA	NA	NA
chr3	+	82428911	82429841	1	Olr575	NM_001000327	930	0	0	0	NA	NA	NA	NA
chr3	-	82435801	82436728	1	Olr576	NM_001000328	927	0	0	0	NA	NA	NA	NA
chr3	+	82650743	82651688	1	Olr588	NM_001000329	945	0	0	0	NA	NA	NA	NA
chr3	+	82685137	82686073	1	Olr592	NM_001000330	936	0	0	0	NA	NA	NA	NA
chr3	+	82484291	82485224	1	Olr597	NM_001000331	1866	0	0	0	NA	NA	NA	NA
chr3	+	82487181	82488114	1	Olr598	NM_001000332	1866	0	0	0	NA	NA	NA	NA
chr3	-	82816357	82817296	1	Olr602	NM_001000333	939	0	0	0	NA	NA	NA	NA
chr3	-	82960770	82961721	1	Olr607	NM_001000334	951	0	0	0	NA	NA	NA	NA
chr3	-	82999320	83000271	1	Olr609	NM_001000335	951	0	0	0	NA	NA	NA	NA
chr3	-	83025338	83026284	1	Olr610	NM_001000336	946	0	0	0	NA	NA	NA	NA
chr3	-	83075943	83076894	1	Olr614	NM_001000337	951	0	0	0	NA	NA	NA	NA
chr3	+	83176447	83177419	1	Olr619	NM_001000338	972	0	0	0	NA	NA	NA	NA
chr3	-	83424035	83424956	1	Olr631	NM_001000339	921	0	0	0	NA	NA	NA	NA
chr3	+	83596138	83597080	1	Olr639	NM_001000340	2826	0	0	0	NA	NA	NA	NA
chr3	-	83819475	83820402	1	Olr651	NM_001000341	927	0	0	0	NA	NA	NA	NA
chr3	+	83861995	83906582	2	Olr655	NM_001000342	930	0	0	0	NA	NA	NA	NA
chr3	+	84269014	84269947	1	Olr657	NM_001000343	933	0	0	0	NA	NA	NA	NA
chr3	-	83835831	83836761	1	Olr658	NM_001000344	1860	0	0	0	NA	NA	NA	NA
chr3	-	84242527	84243457	1	Olr659	NM_001000345	930	0	0	0	NA	NA	NA	NA
chr3	+	84133824	84134760	1	Olr663	NM_001000346	936	0	0	0	NA	NA	NA	NA
chr3	-	84074821	84075757	1	Olr664	NM_001000347	936	0	0	0	NA	NA	NA	NA
chr3	-	84325419	84326266	1	Olr668	NM_001000348	847	0	0	0	NA	NA	NA	NA
chr3	-	84339891	84340827	1	Olr669	NM_001000349	936	0	0	0	NA	NA	NA	NA
chr3	-	84389381	84390296	1	Olr672	NM_001000350	915	0	0	0	NA	NA	NA	NA
chr3	-	84462217	84463153	1	Olr674	NM_001000352	936	0	0	0	NA	NA	NA	NA
chr3	-	84625907	84626843	1	Olr678	NM_001000353	936	0	0	0	NA	NA	NA	NA
chr3	-	84643191	84644127	1	Olr679	NM_001000354	936	0	0	0	NA	NA	NA	NA
chr3	+	84741762	84742698	1	Olr686	NM_001000355	936	0	0	0	NA	NA	NA	NA
chr3	-	84748237	84749170	1	Olr687	NM_001000356	933	0	0	0	NA	NA	NA	NA
chr3	-	84844002	84844929	1	Olr694	NM_001000357	927	0	0	0	NA	NA	NA	NA
chr3	-	84985093	84986046	2	Olr703	NM_001000359	948	0	0	0	NA	NA	NA	NA
chr3	-	85061981	85062926	1	Olr713	NM_001000360	945	0	0	0	NA	NA	NA	NA
chr3	-	85377118	85378063	1	Olr718	NM_001000361	945	0	0	0	NA	NA	NA	NA
chr3	-	85439471	85440383	1	Olr721	NM_001000362	912	0	0	0	NA	NA	NA	NA
chr3	+	85592357	85593285	1	Olr728	NM_001000363	928	0	0	0	NA	NA	NA	NA
chr3	-	85657371	85658280	1	Olr731	NM_001000364	909	0	0	0	NA	NA	NA	NA
chr3	+	109056565	109057504	1	Olr748	NM_001000365	939	0	0	0	NA	NA	NA	NA
chr3	-	109083434	109084346	1	Olr750	NM_001000366	912	0	0	0	NA	NA	NA	NA
chr3	+	109128477	109129410	1	Olr752	NM_001000367	933	0	0	0	NA	NA	NA	NA
chr3	+	109175722	109176640	1	Olr754	NM_001000368	918	0	0	0	NA	NA	NA	NA
chr3	+	109254927	109255866	1	Olr758	NM_001000369	939	0	0	0	NA	NA	NA	NA
chr3	-	109420914	109421853	1	Olr769	NM_001000371	939	0	0	0	NA	NA	NA	NA
chr3	+	109437088	109438027	1	Olr770	NM_001000372	939	0	0	0	NA	NA	NA	NA
chr3	+	109539496	109540435	1	Olr773	NM_001000373	939	0	0	0	NA	NA	NA	NA
chr3	-	109634885	109635824	1	Olr775	NM_001000374	939	0	0	0	NA	NA	NA	NA
chr3	-	109743195	109744158	1	Olr781	NM_001000375	963	0	0	0	NA	NA	NA	NA
chr3	-	109793907	109794846	1	Olr783	NM_001000376	939	0	0	0	NA	NA	NA	NA
chr3	-	109934898	109935837	1	Olr789	NM_001000377	1878	0	0	0	NA	NA	NA	NA
chr3	+	110152529	110153480	1	Olr792	NM_001000378	951	0	0	0	NA	NA	NA	NA
chr3	+	21197582	21198512	1	Olr400	NM_001000379	930	0	0	0	NA	NA	NA	NA
chr3	+	21083541	21084471	1	Olr397	NM_001000380	930	0	0	0	NA	NA	NA	NA
chr3	+	21329699	21330623	1	Olr403	NM_001000381	924	0	0	0	NA	NA	NA	NA
chr3	+	21406728	21407667	1	Olr404	NM_001000382	939	0	0	0	NA	NA	NA	NA
chr3	+	21437670	21438606	1	Olr406	NM_001000383	936	0	0	0	NA	NA	NA	NA
chr3	+	21600450	21601389	1	Olr408	NM_001000384	939	0	0	0	NA	NA	NA	NA
chr3	-	26094429	26095371	1	Olr411	NM_001000385	942	0	0	0	NA	NA	NA	NA
chr3	+	26134849	26135797	1	Olr415	NM_001000386	948	0	0	0	NA	NA	NA	NA
chr3	-	26155330	26156266	1	Olr416	NM_001000387	936	0	0	0	NA	NA	NA	NA
chr3	+	26211395	26212349	1	Olr417	NM_001000388	954	0	0	0	NA	NA	NA	NA
chr3	+	26261910	26262837	1	Olr420	NM_001000389	927	0	0	0	NA	NA	NA	NA
chr3	-	26305761	26306715	1	Olr422	NM_001000390	954	0	0	0	NA	NA	NA	NA
chr3	+	26360500	26361487	1	Olr423	NM_001000391	987	0	0	0	NA	NA	NA	NA
chr3	-	26376144	26377137	1	Olr424	NM_001000392	993	0	0	0	NA	NA	NA	NA
chr3	-	26393588	26394542	1	Olr425	NM_001000393	954	0	0	0	NA	NA	NA	NA
chr3	+	26521273	26522209	1	Olr428	NM_001000394	936	0	0	0	NA	NA	NA	NA
chr3	+	26538056	26538986	1	Olr429	NM_001000395	930	0	0	0	NA	NA	NA	NA
chr3	+	26603043	26604027	1	Olr434	NM_001000397	984	0	0	0	NA	NA	NA	NA
chr5	+	73948758	73949697	1	Olr853	NM_001000398	939	0	0	0	NA	NA	NA	NA
chr5	-	73915316	73916267	1	Olr852	NM_001000399	951	0	0	0	NA	NA	NA	NA
chr9	-	61656422	61657382	1	Olr851	NM_001000400	960	0	0	0	NA	NA	NA	NA
chr9	-	61595250	61596201	1	Olr850	NM_001000401	951	0	0	0	NA	NA	NA	NA
chr5	+	73057742	73058696	1	Olr848	NM_001000402	954	0	0	0	NA	NA	NA	NA
chr5	-	73712312	73713266	1	Olr847	NM_001000403	954	0	0	0	NA	NA	NA	NA
chr5	-	73681774	73683243	2	Olr845	NM_001000404	954	0	0	0	NA	NA	NA	NA
chr5	-	69133632	69134585	1	Olr841	NM_001000405	953	0	0	0	NA	NA	NA	NA
chr5	-	63788845	63789805	1	Olr836	NM_001000406	960	0	0	0	NA	NA	NA	NA
chr5	-	63731909	63732848	1	Olr834	NM_001000407	939	0	0	0	NA	NA	NA	NA
chr5	-	63722489	63723440	1	Olr833	NM_001000408	951	0	0	0	NA	NA	NA	NA
chr5	+	141283999	141284947	1	Olr855	NM_001000409	1896	0	0	0	NA	NA	NA	NA
chr5	-	141596574	141597702	2	Olr865	NM_001000410	948	0	0	0	NA	NA	NA	NA
chr5	-	141629542	141630490	1	Olr866	NM_001000411	948	0	0	0	NA	NA	NA	NA
chr5	-	141684483	141685511	2	Olr867	NM_001000412	948	0	0	0	NA	NA	NA	NA
chr5	-	141737978	141738926	1	Olr869	NM_001000413	948	0	0	0	NA	NA	NA	NA
chr5	+	63850376	63851336	1	Olr840	NM_001000414	960	0	0	0	NA	NA	NA	NA
chr5	-	63836306	63837263	1	Olr839	NM_001000415	957	0	0	0	NA	NA	NA	NA
chr7	+	15788048	15789005	1	Olr1095	NM_001000416	957	0	0	0	NA	NA	NA	NA
chr7	+	14153448	14154390	1	Olr1087	NM_001000418	942	0	0	0	NA	NA	NA	NA
chr7	+	13862638	13863601	1	Olr1086	NM_001000419	963	0	0	0	NA	NA	NA	NA
chr7	+	13837924	13838857	1	Olr1085	NM_001000420	933	0	0	0	NA	NA	NA	NA
chr7	-	13607715	13608675	1	Olr1075	NM_001000421	960	0	0	0	NA	NA	NA	NA
chr7	-	139121432	139122362	1	Olr1106	NM_001000423	930	0	0	0	NA	NA	NA	NA
chr7	+	139175069	139175996	1	Olr1107	NM_001000424	927	0.104038	0	0.208076	Inf	Inf	0.977633	1
chr7	+	139250061	139250994	1	Olr1111	NM_001000425	933	0.138725	0.27745	0	0	#NAME?	1	1
chr8	+	18862484	18863423	1	Olr1124	NM_001000426	939	0	0	0	NA	NA	NA	NA
chr8	-	18133223	18134198	1	Olr1139	NM_001000427	1950	0	0	0	NA	NA	NA	NA
chr8	+	19037753	19038692	1	Olr1130	NM_001000428	939	0	0	0	NA	NA	NA	NA
chr8	-	19453949	19454867	1	Olr1145	NM_001000429	918	0	0	0	NA	NA	NA	NA
chr8	-	19592858	19593797	1	Olr1147	NM_001000431	939	0	0	0	NA	NA	NA	NA
chr8	-	19740485	19741403	1	Olr1151	NM_001000432	918	0	0	0	NA	NA	NA	NA
chr8	-	19850088	19851027	1	Olr1155	NM_001000433	939	0	0	0	NA	NA	NA	NA
chr8	+	20431367	20432324	1	Olr1169	NM_001000434	1914	0	0	0	NA	NA	NA	NA
chr8	+	40254991	40255924	1	Olr1196	NM_001000435	933	0	0	0	NA	NA	NA	NA
chr8	+	40258837	40259765	1	Olr1198	NM_001000436	928	0	0	0	NA	NA	NA	NA
chr8	+	40482625	40483570	1	Olr1204	NM_001000437	945	0	0	0	NA	NA	NA	NA
chr8	+	40701324	40702396	2	Olr1214	NM_001000438	933	0	0	0	NA	NA	NA	NA
chr8	+	40759353	40760286	1	Olr1217	NM_001000439	933	0	0	0	NA	NA	NA	NA
chr8	+	41275278	41276217	1	Olr1222	NM_001000440	1878	0	0	0	NA	NA	NA	NA
chr8	+	41292459	41293401	1	Olr1223	NM_001000441	1884	0	0	0	NA	NA	NA	NA
chr4	+	1347071	1348013	1	Olr1226	NM_001000442	2826	0	0	0	NA	NA	NA	NA
chr4	+	1354981	1355914	1	Olr1227	NM_001000443	2799	0	0	0	NA	NA	NA	NA
chr4	+	1391552	1392494	1	Olr1229	NM_001000444	2826	0	0	0	NA	NA	NA	NA
chr4	+	1427568	1428501	1	Olr1232	NM_001000445	933	0	0	0	NA	NA	NA	NA
chr4	+	1408788	1450489	2	Olr1234	NM_001000446	942	0	0	0	NA	NA	NA	NA
chr4	+	1475355	1476297	1	Olr1235	NM_001000447	942	0	0	0	NA	NA	NA	NA
chr4	+	1525678	1526611	1	Olr1240	NM_001000448	1866	0	0	0	NA	NA	NA	NA
chr4	+	1535977	1536910	1	Olr1241	NM_001000449	2799	0	0	0	NA	NA	NA	NA
chr4	+	1558476	1559412	1	Olr1242	NM_001000450	1872	0	0	0	NA	NA	NA	NA
chr4	+	1624709	1625642	1	Olr1243	NM_001000451	933	0	0	0	NA	NA	NA	NA
chr4	+	1684101	1685034	1	Olr1248	NM_001000452	933	0	0	0	NA	NA	NA	NA
chr4	+	1730323	1731253	1	Olr1251	NM_001000453	930	0	0	0	NA	NA	NA	NA
chr3	-	165131761	165132694	1	Olr1252	NM_001000454	2799	0	0	0	NA	NA	NA	NA
chr2	+	65098324	65099272	1	Olr1259	NM_001000455	2844	0	0	0	NA	NA	NA	NA
chr2	+	54409391	54410327	1	Olr1264	NM_001000456	2808	0	0	0	NA	NA	NA	NA
chr2	+	54421816	54422770	1	Olr1265	NM_001000457	4770	0	0	0	NA	NA	NA	NA
chr2	-	54315061	54315997	1	Olr1273	NM_001000458	7488	0	0	0	NA	NA	NA	NA
chr15	+	39672708	39673653	1	Olr1285	NM_001000459	945	0	0	0	NA	NA	NA	NA
chr15	+	39453081	39454026	1	Olr1293	NM_001000460	1890	0	0	0	NA	NA	NA	NA
chr15	+	39387181	39388126	1	Olr1297	NM_001000461	945	0	0	0	NA	NA	NA	NA
chr15	+	39387181	39388126	1	Olr1301	NM_001000462	945	0	0	0	NA	NA	NA	NA
chr8	-	43178477	43179422	1	Olr1302	NM_001000463	945	0	0	0	NA	NA	NA	NA
chr8	-	43220784	43221720	1	Olr1304	NM_001000464	936	0	0	0	NA	NA	NA	NA
chr8	-	43269339	43270278	1	Olr1306	NM_001000465	939	0	0	0	NA	NA	NA	NA
chr8	+	43341571	43342516	1	Olr1309	NM_001000466	945	0	0	0	NA	NA	NA	NA
chr8	+	43368687	43369632	1	Olr1311	NM_001000467	945	0	0	0	NA	NA	NA	NA
chr8	-	43429125	43430043	1	Olr1314	NM_001000468	918	0	0	0	NA	NA	NA	NA
chr8	-	43455953	43456889	1	Olr1315	NM_001000469	936	0	0	0	NA	NA	NA	NA
chr8	-	61912817	61913756	1	Olr1319	NM_001000470	939	0	0	0	NA	NA	NA	NA
chr8	-	61891327	61892266	1	Olr1320	NM_001000471	939	0	0	0	NA	NA	NA	NA
chr8	-	61844521	61845457	1	Olr1323	NM_001000472	936	0	0	0	NA	NA	NA	NA
chr8	-	61797830	61798754	1	Olr1325	NM_001000473	924	0	0	0	NA	NA	NA	NA
chr8	-	61786057	61787437	2	Olr1326	NM_001000474	939	0	0	0	NA	NA	NA	NA
chr8	-	61772056	61772992	1	Olr1327	NM_001000475	936	0	0	0	NA	NA	NA	NA
chr8	+	61724315	61725245	1	Olr1330	NM_001000476	930	0	0	0	NA	NA	NA	NA
chr8	+	61704396	61705335	1	Olr1332	NM_001000477	939	0	0	0	NA	NA	NA	NA
chr8	+	61671499	61672428	1	Olr1334	NM_001000478	929	0	0	0	NA	NA	NA	NA
chr8	+	61665627	61666660	2	Olr1335	NM_001000479	933	0	0	0	NA	NA	NA	NA
chr8	-	61647009	61647963	1	Olr1337	NM_001000480	954	0	0	0	NA	NA	NA	NA
chr8	+	61606828	61607773	1	Olr1339	NM_001000481	945	0	0	0	NA	NA	NA	NA
chr8	-	61493309	61494248	1	Olr1341	NM_001000482	939	0	0	0	NA	NA	NA	NA
chr9	-	99331867	99332803	1	Olr1344	NM_001000483	936	0	0	0	NA	NA	NA	NA
chr9	+	99410827	99411787	1	Olr1349	NM_001000484	960	0	0	0	NA	NA	NA	NA
chr4	+	1901034	1902111	2	Olr1096	NM_001000485	951	0	0	0	NA	NA	NA	NA
chr7	-	6810960	6811902	1	Olr959	NM_001000486	1884	0	0	0	NA	NA	NA	NA
chr7	+	6765415	6766360	1	Olr962	NM_001000487	945	0	0	0	NA	NA	NA	NA
chr8	+	42234639	42236021	2	Olr1218	NM_001000488	933	0	0	0	NA	NA	NA	NA
chrX	-	136797793	136798732	1	Olr1765	NM_001000489	939	0	0	0	NA	NA	NA	NA
chrX	-	136955879	136956812	1	Olr1766	NM_001000490	933	0	0	0	NA	NA	NA	NA
chrX	-	137078084	137079008	1	Olr1767	NM_001000491	924	0	0	0	NA	NA	NA	NA
chr7	-	5407347	5408286	1	Olr1751	NM_001000492	939	0	0	0	NA	NA	NA	NA
chr10	-	10698256	10699195	1	Olr1356	NM_001000493	939	0.0895669	0.179134	0	0	#NAME?	1	1
chr10	-	12333241	12334183	1	Olr1369	NM_001000494	942	0	0	0	NA	NA	NA	NA
chr10	-	60508409	60509348	1	Olr1504	NM_001000495	939	0	0	0	NA	NA	NA	NA
chr11	-	48804983	48805904	1	Olr1533	NM_001000496	921	0	0	0	NA	NA	NA	NA
chr7	-	3483477	3484407	1	Olr878	NM_001000497	930	0	0	0	NA	NA	NA	NA
chr7	+	9469797	9470736	1	Olr1065	NM_001000498	1878	0	0	0	NA	NA	NA	NA
chr13	+	95994474	95995404	1	Olr1576	NM_001000499	930	0	0	0	NA	NA	NA	NA
chr13	+	96759461	96760409	1	Olr1595	NM_001000500	948	0.17399	0	0.347981	Inf	Inf	0.977642	1
chr13	+	96767914	96768880	1	Olr1596	NM_001000501	966	0.221673	0.235271	0.208076	0.884411	-0.177212	1	1
chr15	-	16294145	16295099	1	Olr1606	NM_001000502	954	0	0	0	NA	NA	NA	NA
chr15	-	31829583	31830579	1	Olr1637	NM_001000503	996	0.457162	0.358268	0.556057	1.55207	0.634194	1	1
chr1	+	170957939	170958905	1	Olr37	NM_001000504	966	0	0	0	NA	NA	NA	NA
chr1	-	235291855	235292812	1	Olr318	NM_001000505	1914	0	0	0	NA	NA	NA	NA
chr1	+	235380203	235381133	1	Olr319	NM_001000506	930	0	0	0	NA	NA	NA	NA
chr1	+	235842831	235843788	1	Olr337	NM_001000507	957	0	0	0	NA	NA	NA	NA
chr20	+	633587	634553	1	Olr1687	NM_001000508	966	0	0	0	NA	NA	NA	NA
chr20	+	1182709	1183648	1	Olr1709	NM_001000509	939	0	0	0	NA	NA	NA	NA
chr20	-	3737724	3738654	1	Olr1733	NM_001000510	930	0	0	0	NA	NA	NA	NA
chr3	+	82156574	82157546	1	Olr561	NM_001000511	972	0	0	0	NA	NA	NA	NA
chr3	-	82799531	82800485	1	Olr601	NM_001000512	954	0	0	0	NA	NA	NA	NA
chr3	-	84956976	84957924	1	Olr698	NM_001000513	948	0	0	0	NA	NA	NA	NA
chr3	+	85551351	85552284	1	Olr725	NM_001000514	933	0	0	0	NA	NA	NA	NA
chr5	-	141301170	141302109	1	Olr856	NM_001000515	1878	0	0	0	NA	NA	NA	NA
chr8	-	18786218	18787160	1	Olr1121	NM_001000516	942	0	0	0	NA	NA	NA	NA
chr2	-	54672726	54673686	1	Olr1280	NM_001000517	2880	0	0	0	NA	NA	NA	NA
chr15	+	39697297	39698350	1	Olr1283	NM_001000518	1053	0	0	0	NA	NA	NA	NA
chr8	-	43290136	43291072	1	Olr1307	NM_001000519	936	0	0	0	NA	NA	NA	NA
chr9	+	99385969	99386941	1	Olr1346	NM_001000520	972	0	0	0	NA	NA	NA	NA
chr15	+	31282506	31283442	1	Olr1619	NM_001000521	936	0	0	0	NA	NA	NA	NA
chr7	-	9637938	9638883	1	Olr1069	NM_001000522	945	0	0	0	NA	NA	NA	NA
chr10	-	12072738	12073680	1	Olr1381	NM_001000523	942	0	0	0	NA	NA	NA	NA
chr10	+	34435794	34436730	1	Olr1393	NM_001000524	936	0	0	0	NA	NA	NA	NA
chr10	+	44098150	44099178	2	Olr1433	NM_001000525	984	0.0895669	0.179134	0	0	#NAME?	1	1
chr10	-	44509842	44510769	1	Olr1457	NM_001000526	927	0	0	0	NA	NA	NA	NA
chr10	-	59722747	59744753	3	Olr1481	NM_001000527	937	0	0	0	NA	NA	NA	NA
chr10	-	60675306	60676242	1	Olr1509	NM_001000528	936	0	0	0	NA	NA	NA	NA
chr10	-	12126206	12127169	1	Olr1525	NM_001000529	963	0	0	0	NA	NA	NA	NA
chr11	+	46471350	46472274	1	Olr1538	NM_001000530	924	0	0	0	NA	NA	NA	NA
chr11	-	46543817	46544744	1	Olr1542	NM_001000531	927	0	0	0	NA	NA	NA	NA
chr11	+	88084799	88085738	1	Olr1568	NM_001000532	1878	0	0	0	NA	NA	NA	NA
chr13	-	96207044	96207977	1	Olr1581	NM_001000533	933	0	0	0	NA	NA	NA	NA
chr15	+	16394648	16395596	1	Olr1607	NM_001000534	948	0	0	0	NA	NA	NA	NA
chr15	+	32725887	32726814	1	Olr1643	NM_001000535	927	0	0	0	NA	NA	NA	NA
chr17	-	58555248	58556187	1	Olr1657	NM_001000536	939	0	0	0	NA	NA	NA	NA
chr19	+	35649328	35650273	1	Olr1667	NM_001000537	945	0	0	0	NA	NA	NA	NA
chr1	+	63473384	63474072	1	Olr1l	NM_001000538	1649	0	0	0	NA	NA	NA	NA
chr1	+	71876782	71877721	1	Olr6	NM_001000539	939	0	0	0	NA	NA	NA	NA
chr1	-	155867357	155868281	1	Olr12	NM_001000540	924	0	0	0	NA	NA	NA	NA
chr1	+	173905379	173906330	1	Olr43	NM_001000541	951	0	0	0	NA	NA	NA	NA
chr1	+	174053615	174054569	1	Olr63	NM_001000542	954	0	0	0	NA	NA	NA	NA
chr1	+	174564355	174565294	1	Olr87	NM_001000543	939	0.0895669	0.179134	0	0	#NAME?	1	1
chr1	-	175378975	175379920	1	Olr142	NM_001000544	945	0	0	0	NA	NA	NA	NA
chr1	-	175416893	175417838	1	Olr145	NM_001000545	945	0	0	0	NA	NA	NA	NA
chr1	+	175692604	175693546	1	Olr152	NM_001000546	942	0	0	0	NA	NA	NA	NA
chr1	+	175715820	175716774	1	Olr154	NM_001000547	954	0	0	0	NA	NA	NA	NA
chr1	+	175774360	175775320	1	Olr158	NM_001000548	1920	0	0	0	NA	NA	NA	NA
chr1	-	177005302	177006241	1	Olr192	NM_001000549	939	0	0	0	NA	NA	NA	NA
chr1	-	177192984	177193953	1	Olr202	NM_001000550	969	0	0	0	NA	NA	NA	NA
chr1	-	177931075	177932026	1	Olr218	NM_001000551	951	0	0	0	NA	NA	NA	NA
chr1	+	177967175	177968099	1	Olr220	NM_001000552	924	0	0	0	NA	NA	NA	NA
chr1	-	178049072	178050017	1	Olr224	NM_001000553	945	0	0	0	NA	NA	NA	NA
chr1	-	219547269	219548208	1	Olr286	NM_001000554	939	0	0	0	NA	NA	NA	NA
chr1	+	220269157	220270090	1	Olr311	NM_001000555	933	0	0	0	NA	NA	NA	NA
chr1	+	237302452	237303385	1	Olr361	NM_001000556	933	0	0	0	NA	NA	NA	NA
chr20	-	814958	815921	1	Olr1693	NM_001000557	963	0.278028	0	0.556057	Inf	Inf	0.630055	0.994674
chr2	-	219010387	219011350	1	Olr390	NM_001000558	963	0	0	0	NA	NA	NA	NA
chr3	+	20993471	20994410	1	Olr395	NM_001000559	939	0	0	0	NA	NA	NA	NA
chr3	+	21158930	21159854	1	Olr399	NM_001000560	924	0	0	0	NA	NA	NA	NA
chr3	-	80061897	80062842	1	Olr482	NM_001000561	945	0	0	0	NA	NA	NA	NA
chr3	-	80905287	80906235	1	Olr522	NM_001000562	948	0	0	0	NA	NA	NA	NA
chr3	-	81216869	81217835	1	Olr532	NM_001000563	966	0	0	0	NA	NA	NA	NA
chr3	-	81246610	81247543	1	Olr536	NM_001000564	933	0	0	0	NA	NA	NA	NA
chr3	-	81353394	81354333	1	Olr541	NM_001000565	939	0	0	0	NA	NA	NA	NA
chr3	-	81736842	81737781	1	Olr542	NM_001000566	939	0	0	0	NA	NA	NA	NA
chr3	-	82449460	82450399	1	Olr577	NM_001000567	939	0	0	0	NA	NA	NA	NA
chr3	-	82467997	82468930	1	Olr578	NM_001000568	933	0	0	0	NA	NA	NA	NA
chr3	-	84797344	84798280	1	Olr690	NM_001000569	936	0	0	0	NA	NA	NA	NA
chr3	-	85144411	85145332	1	Olr705	NM_001000570	921	0	0	0	NA	NA	NA	NA
chr3	-	85258906	85259851	1	Olr710	NM_001000571	945	0	0	0	NA	NA	NA	NA
chr3	+	85462433	85463363	1	Olr722	NM_001000572	930	0	0	0	NA	NA	NA	NA
chr3	-	85506163	85507084	1	Olr724	NM_001000573	921	0	0	0	NA	NA	NA	NA
chr3	-	85600913	85601840	1	Olr729	NM_001000574	927	0	0	0	NA	NA	NA	NA
chr3	-	85835261	85836188	1	Olr741	NM_001000575	927	0	0	0	NA	NA	NA	NA
chr3	-	85847319	85848237	1	Olr742	NM_001000576	918	0	0	0	NA	NA	NA	NA
chr3	-	85879342	85880266	1	Olr744	NM_001000577	924	0	0	0	NA	NA	NA	NA
chr3	+	85901622	85902552	1	Olr745	NM_001000578	930	0	0	0	NA	NA	NA	NA
chr3	-	109681491	109682430	1	Olr777	NM_001000579	939	0	0	0	NA	NA	NA	NA
chr3	-	110040146	110041085	1	Olr791	NM_001000580	939	0	0	0	NA	NA	NA	NA
chr5	-	63815561	63816518	1	Olr838	NM_001000581	957	0	0	0	NA	NA	NA	NA
chr5	-	80054587	80055529	1	Olr854	NM_001000582	942	0	0	0	NA	NA	NA	NA
chr5	-	141313646	141314595	2	Olr857	NM_001000583	1896	0	0	0	NA	NA	NA	NA
chr5	+	141333278	141334217	1	Olr858	NM_001000584	1878	0	0	0	NA	NA	NA	NA
chr5	+	141361135	141362083	1	Olr859	NM_001000585	1896	0	0	0	NA	NA	NA	NA
chr7	-	3689826	3690765	1	Olr879	NM_001000586	939	0	0	0	NA	NA	NA	NA
chr7	+	4037276	4038230	1	Olr916	NM_001000587	1908	0	0	0	NA	NA	NA	NA
chr7	+	16467946	16468909	1	Olr927	NM_001000588	963	0	0	0	NA	NA	NA	NA
chr7	-	6810960	6811902	1	Olr960	NM_001000589	1884	0	0	0	NA	NA	NA	NA
chr4	-	13547610	13548570	1	Olr987	NM_001000590	960	0	0	0	NA	NA	NA	NA
chr7	-	9659371	9660331	1	Olr1070	NM_001000591	960	0	0	0	NA	NA	NA	NA
chr7	-	13743246	13744200	1	Olr1081	NM_001000592	954	0	0	0	NA	NA	NA	NA
chr7	+	15794458	15795394	1	Olr1091	NM_001000593	936	0	0	0	NA	NA	NA	NA
chr8	+	21367596	21368559	1	Olr1193	NM_001000594	963	0.135598	0.271196	0	0	#NAME?	1	1
chr4	+	1408788	1409730	1	Olr1230	NM_001000595	942	0	0	0	NA	NA	NA	NA
chr3	-	165196778	165197714	1	Olr1257	NM_001000596	2808	0	0	0	NA	NA	NA	NA
chr15	+	39431627	39432563	1	Olr1294	NM_001000597	936	0	0	0	NA	NA	NA	NA
chr15	+	39416287	39417232	1	Olr1295	NM_001000598	945	0	0	0	NA	NA	NA	NA
chr8	-	61755757	61756681	1	Olr1328	NM_001000599	924	0	0	0	NA	NA	NA	NA
chr3	+	110253651	110254587	1	Olr796	NM_001000600	936	0	0	0	NA	NA	NA	NA
chr3	+	110234005	110234944	1	Olr795	NM_001000601	939	0	0	0	NA	NA	NA	NA
chr3	-	109890951	109891890	1	Olr788	NM_001000602	939	0	0	0	NA	NA	NA	NA
chr3	-	109815208	109816171	1	Olr785	NM_001000603	963	0	0	0	NA	NA	NA	NA
chr3	-	109808136	109809075	1	Olr784	NM_001000604	1878	0	0	0	NA	NA	NA	NA
chr3	-	109763962	109764901	1	Olr782	NM_001000605	939	0.17399	0	0.347981	Inf	Inf	0.977642	1
chr3	-	109732069	109733008	1	Olr780	NM_001000606	939	0	0	0	NA	NA	NA	NA
chr3	-	109702908	109703835	1	Olr778	NM_001000607	927	0	0	0	NA	NA	NA	NA
chr3	-	109657493	109658432	1	Olr776	NM_001000608	939	0	0	0	NA	NA	NA	NA
chr3	+	109517399	109518338	1	Olr772	NM_001000609	939	0	0	0	NA	NA	NA	NA
chr3	+	109455288	109456233	1	Olr771	NM_001000610	945	0	0	0	NA	NA	NA	NA
chr3	-	109368336	109369275	1	Olr767	NM_001000611	939	0	0	0	NA	NA	NA	NA
chr3	+	109226373	109227309	1	Olr757	NM_001000613	936	0	0	0	NA	NA	NA	NA
chr3	+	109216026	109216944	1	Olr756	NM_001000614	918	0	0	0	NA	NA	NA	NA
chr3	+	109071079	109072018	1	Olr749	NM_001000615	939	0	0	0	NA	NA	NA	NA
chr3	-	85764825	85765752	1	Olr737	NM_001000616	927	0	0	0	NA	NA	NA	NA
chr3	-	85697628	85733136	2	Olr734	NM_001000617	930	0	0	0	NA	NA	NA	NA
chr3	-	85689447	85690377	1	Olr733	NM_001000618	930	0	0	0	NA	NA	NA	NA
chr3	+	85577427	85578357	1	Olr727	NM_001000619	930	0	0	0	NA	NA	NA	NA
chr3	+	85592364	85593285	1	Olr726	NM_001000620	921	0	0	0	NA	NA	NA	NA
chr3	-	85354026	85354977	1	Olr717	NM_001000621	951	0	0	0	NA	NA	NA	NA
chr3	-	85334830	85336023	2	Olr716	NM_001000622	954	0	0	0	NA	NA	NA	NA
chr3	-	85309570	85310494	1	Olr715	NM_001000623	924	0	0	0	NA	NA	NA	NA
chr3	-	85285477	85286431	1	Olr712	NM_001000624	954	0	0	0	NA	NA	NA	NA
chr3	-	85269301	85270246	1	Olr711	NM_001000625	945	0	0	0	NA	NA	NA	NA
chr3	-	85124088	85125012	1	Olr704	NM_001000626	924	0	0	0	NA	NA	NA	NA
chr3	-	84993121	84994039	1	Olr701	NM_001000627	918	0	0	0	NA	NA	NA	NA
chr3	-	85044806	85045742	1	Olr695	NM_001000628	936	0	0	0	NA	NA	NA	NA
chr3	-	84837571	84838489	1	Olr693	NM_001000629	918	0	0	0	NA	NA	NA	NA
chr3	+	84819099	84820050	1	Olr691	NM_001000630	951	0	0	0	NA	NA	NA	NA
chr3	-	84659858	84660794	1	Olr681	NM_001000631	936	0	0	0	NA	NA	NA	NA
chr3	-	84491156	84492092	1	Olr675	NM_001000632	1872	0	0	0	NA	NA	NA	NA
chr3	-	84358836	84359772	1	Olr670	NM_001000633	936	0	0	0	NA	NA	NA	NA
chr3	+	84054859	84320251	2	Olr665	NM_001000634	905	0	0	0	NA	NA	NA	NA
chr3	-	84225717	84226641	1	Olr660	NM_001000635	924	0	0	0	NA	NA	NA	NA
chr3	-	83878726	83879656	1	Olr654	NM_001000636	930	0	0	0	NA	NA	NA	NA
chr3	+	83861995	83862925	1	Olr653	NM_001000637	930	0	0	0	NA	NA	NA	NA
chr3	-	83878726	83879656	1	Olr652	NM_001000638	930	0	0	0	NA	NA	NA	NA
chr3	-	83804279	83805206	1	Olr650	NM_001000639	927	0	0	0	NA	NA	NA	NA
chr3	+	83781980	83782916	1	Olr649	NM_001000640	936	0	0	0	NA	NA	NA	NA
chr3	+	83757038	83757974	1	Olr648	NM_001000641	936	0	0	0	NA	NA	NA	NA
chr3	+	83727758	83728679	1	Olr646	NM_001000642	921	0	0	0	NA	NA	NA	NA
chr3	-	83628907	83629816	1	Olr641	NM_001000643	909	0	0	0	NA	NA	NA	NA
chr3	+	83621381	83622311	1	Olr640	NM_001000644	930	0	0	0	NA	NA	NA	NA
chr3	+	83548812	83549754	1	Olr636	NM_001000645	942	0	0	0	NA	NA	NA	NA
chr3	+	83496317	83497247	1	Olr635	NM_001000646	930	0	0	0	NA	NA	NA	NA
chr3	+	83473990	83474932	1	Olr634	NM_001000647	942	0	0	0	NA	NA	NA	NA
chr3	+	83457731	83458643	1	Olr633	NM_001000648	912	0	0	0	NA	NA	NA	NA
chr3	-	83331831	83332767	1	Olr625	NM_001000649	936	0	0	0	NA	NA	NA	NA
chr3	+	83299358	83300273	1	Olr624	NM_001000650	915	0	0	0	NA	NA	NA	NA
chr3	-	83225390	83226227	1	Olr623	NM_001000651	837	0	0	0	NA	NA	NA	NA
chr3	+	83251546	83369227	2	Olr621	NM_001000652	912	0	0	0	NA	NA	NA	NA
chr3	-	83056147	83057080	1	Olr613	NM_001000654	933	0	0	0	NA	NA	NA	NA
chr3	-	82989004	82989985	1	Olr608	NM_001000655	981	0	0	0	NA	NA	NA	NA
chr3	-	82847919	82848876	1	Olr604	NM_001000656	957	0	0	0	NA	NA	NA	NA
chr3	+	82702340	82703276	1	Olr594	NM_001000657	936	0	0	0	NA	NA	NA	NA
chr3	+	82672136	82673069	1	Olr590	NM_001000658	933	0	0	0	NA	NA	NA	NA
chr3	-	82636492	82637428	1	Olr587	NM_001000659	936	0	0	0	NA	NA	NA	NA
chr3	+	82620575	82621511	1	Olr586	NM_001000660	936	0	0	0	NA	NA	NA	NA
chr3	-	82592997	82593936	1	Olr584	NM_001000661	939	0	0	0	NA	NA	NA	NA
chr3	+	82549194	82550127	1	Olr582	NM_001000662	933	0	0	0	NA	NA	NA	NA
chr3	+	82523693	82524632	1	Olr581	NM_001000663	939	0	0	0	NA	NA	NA	NA
chr3	+	82299015	82299945	1	Olr569	NM_001000664	930	0	0	0	NA	NA	NA	NA
chr3	+	82234978	82235923	1	Olr566	NM_001000665	945	0	0	0	NA	NA	NA	NA
chr3	+	82196400	82197345	1	Olr563	NM_001000666	945	0	0	0	NA	NA	NA	NA
chr3	+	82183820	82184777	1	Olr562	NM_001000667	957	0	0	0	NA	NA	NA	NA
chr3	+	82109915	82110860	1	Olr559	NM_001000668	945	0	0	0	NA	NA	NA	NA
chr3	+	82003313	82004336	1	Olr557	NM_001000669	1023	0	0	0	NA	NA	NA	NA
chr3	-	81670185	81671123	1	Olr551	NM_001000670	938	0	0	0	NA	NA	NA	NA
chr3	-	81256384	81257323	1	Olr537	NM_001000671	939	0	0	0	NA	NA	NA	NA
chr3	-	81239667	81240609	1	Olr535	NM_001000672	942	0	0	0	NA	NA	NA	NA
chr3	-	81224224	81225160	1	Olr533	NM_001000673	936	0	0	0	NA	NA	NA	NA
chr3	-	81152307	81153252	1	Olr529	NM_001000674	945	0	0	0	NA	NA	NA	NA
chr3	-	81097477	81098425	1	Olr527	NM_001000675	948	0	0	0	NA	NA	NA	NA
chr3	-	81020580	81021531	1	Olr518	NM_001000676	951	0	0	0	NA	NA	NA	NA
chr3	-	80490608	80491550	1	Olr508	NM_001000677	942	0	0	0	NA	NA	NA	NA
chr3	-	80453483	80454425	1	Olr507	NM_001000678	942	0	0	0	NA	NA	NA	NA
chr3	-	80431994	80432936	1	Olr505	NM_001000679	942	0	0	0	NA	NA	NA	NA
chr3	-	80388172	80389126	1	Olr500	NM_001000680	954	0	0	0	NA	NA	NA	NA
chr3	-	80329316	80330258	1	Olr496	NM_001000681	1884	0	0	0	NA	NA	NA	NA
chr3	-	80213827	80214787	1	Olr486	NM_001000682	960	0	0	0	NA	NA	NA	NA
chr3	-	80078275	80079235	1	Olr483	NM_001000683	1920	0	0	0	NA	NA	NA	NA
chr3	-	80052952	80053897	1	Olr481	NM_001000684	945	0	0	0	NA	NA	NA	NA
chr3	-	80043887	80044829	1	Olr480	NM_001000685	942	0	0	0	NA	NA	NA	NA
chr3	+	79958906	79959839	1	Olr475	NM_001000686	933	0	0	0	NA	NA	NA	NA
chr3	+	79706421	79707336	1	Olr456	NM_001000687	915	0	0	0	NA	NA	NA	NA
chr3	-	79251725	79252655	1	Olr436	NM_001000688	930	0	0	0	NA	NA	NA	NA
chr1	+	156617851	156618790	1	Olr34	NM_001000689	939	0	0	0	NA	NA	NA	NA
chr1	-	156569435	156570443	1	Olr32	NM_001000690	1008	0	0	0	NA	NA	NA	NA
chr1	-	156517735	156518743	1	Olr29	NM_001000691	1008	0	0	0	NA	NA	NA	NA
chr1	+	156435245	156436238	1	Olr25	NM_001000692	993	0	0	0	NA	NA	NA	NA
chr1	-	156405508	156406450	1	Olr24	NM_001000693	942	0	0	0	NA	NA	NA	NA
chr1	-	155976645	155977596	1	Olr16	NM_001000694	2853	0	0	0	NA	NA	NA	NA
chr1	-	155934238	155935180	1	Olr14	NM_001000695	1884	0	0	0	NA	NA	NA	NA
chr7	+	4512892	4513848	3	Olr1845	NM_001000696	953	0	0	0	NA	NA	NA	NA
chr7	-	9565688	9566636	1	Olr1067	NM_001000697	948	0	0	0	NA	NA	NA	NA
chr7	-	9218622	9219579	1	Olr1060	NM_001000698	957	0	0	0	NA	NA	NA	NA
chr7	+	8614079	8615024	1	Olr1014	NM_001000699	945	0	0	0	NA	NA	NA	NA
chr7	-	16173445	16174381	1	Olr996	NM_001000700	936	0	0	0	NA	NA	NA	NA
chr7	-	4205493	4206429	1	Olr982	NM_001000702	936	0	0	0	NA	NA	NA	NA
chr7	+	6264599	6265553	1	Olr954	NM_001000703	1908	0	0	0	NA	NA	NA	NA
chr7	+	16571901	16572840	1	Olr931	NM_001000704	939	0	0	0	NA	NA	NA	NA
chr7	-	16231685	16232630	1	Olr922	NM_001000705	1890	0	0	0	NA	NA	NA	NA
chr7	-	5684751	5685689	1	Olr906	NM_001000706	938	0	0	0	NA	NA	NA	NA
chr7	-	3434759	3435698	1	Olr877	NM_001000707	939	0	0	0	NA	NA	NA	NA
chr7	+	3410035	3410974	1	Olr876	NM_001000708	939	0	0	0	NA	NA	NA	NA
chr7	+	13791120	13792053	1	Olr1084	NM_001000709	933	0	0	0	NA	NA	NA	NA
chr7	-	13743268	13744200	1	Olr1083	NM_001000710	932	0	0	0	NA	NA	NA	NA
chr7	-	13692131	13693064	1	Olr1079	NM_001000711	933	0	0	0	NA	NA	NA	NA
chr7	-	13628164	13629121	1	Olr1076	NM_001000712	957	0	0	0	NA	NA	NA	NA
chr10	+	74900974	74912306	2	Olr1523	NM_001000713	910	0.11563	0	0.23126	Inf	Inf	0.977635	1
chr10	+	60891354	60892290	1	Olr1520	NM_001000714	936	0	0	0	NA	NA	NA	NA
chr10	+	60465194	60466130	1	Olr1501	NM_001000715	936	0	0	0	NA	NA	NA	NA
chr10	-	60241753	60242686	1	Olr1496	NM_001000716	1866	0	0	0	NA	NA	NA	NA
chr10	-	60142392	60143331	1	Olr1491	NM_001000717	939	0	0	0	NA	NA	NA	NA
chr10	+	60128735	60129674	1	Olr1490	NM_001000718	939	0	0	0	NA	NA	NA	NA
chr10	+	60100709	60101648	1	Olr1488	NM_001000719	939	0	0	0	NA	NA	NA	NA
chr10	-	60045489	60046428	1	Olr1486	NM_001000720	939	0	0	0	NA	NA	NA	NA
chr10	-	59927434	59928370	1	Olr1479	NM_001000721	936	0	0	0	NA	NA	NA	NA
chr10	-	59696174	59770873	3	Olr1471	NM_001000722	929	0	0	0	NA	NA	NA	NA
chr10	-	59722747	59723692	1	Olr1470	NM_001000723	1890	0	0	0	NA	NA	NA	NA
chr10	-	59696158	59697103	1	Olr1468	NM_001000724	945	0	0	0	NA	NA	NA	NA
chr11	+	46872265	46873213	1	Olr1558	NM_001000725	948	0	0	0	NA	NA	NA	NA
chr11	-	46778557	46802909	2	Olr1555	NM_001000726	1860	0	0	0	NA	NA	NA	NA
chr11	+	46707835	46708765	1	Olr1551	NM_001000727	930	0	0	0	NA	NA	NA	NA
chr11	+	46526973	46527903	1	Olr1541	NM_001000728	930	0	0	0	NA	NA	NA	NA
chr11	+	46496673	46497594	1	Olr1539	NM_001000729	921	0	0	0	NA	NA	NA	NA
chr1	-	179940924	179941869	1	Olr278	NM_001000730	945	0	0	0	NA	NA	NA	NA
chr1	+	179806158	179807103	1	Olr271	NM_001000732	945	0	0	0	NA	NA	NA	NA
chr1	+	179751364	179752309	1	Olr268	NM_001000733	945	0	0	0	NA	NA	NA	NA
chr1	+	179126748	179127681	1	Olr241	NM_001000734	933	0	0	0	NA	NA	NA	NA
chr1	-	177844505	177845432	1	Olr213	NM_001000735	927	0	0	0	NA	NA	NA	NA
chr1	-	177766495	177767446	1	Olr209	NM_001000736	951	0	0	0	NA	NA	NA	NA
chr1	+	175877603	175878569	1	Olr164	NM_001000737	1932	0	0	0	NA	NA	NA	NA
chr1	+	175797522	175798491	1	Olr160	NM_001000738	1938	0	0	0	NA	NA	NA	NA
chr1	-	175525827	175526760	1	Olr150	NM_001000739	933	0	0	0	NA	NA	NA	NA
chr1	-	175028770	175029730	1	Olr125	NM_001000740	960	0	0	0	NA	NA	NA	NA
chr1	+	174848752	174849700	1	Olr111	NM_001000742	948	0	0	0	NA	NA	NA	NA
chr1	+	174824189	174825155	1	Olr110	NM_001000743	966	0	0	0	NA	NA	NA	NA
chr1	+	174717256	174718377	2	Olr101	NM_001000744	951	0	0	0	NA	NA	NA	NA
chr1	+	174585042	174585993	1	Olr89	NM_001000745	951	0	0	0	NA	NA	NA	NA
chr1	+	174585046	174585993	1	Olr88	NM_001000746	947	0	0	0	NA	NA	NA	NA
chr1	+	174552377	174553316	1	Olr86	NM_001000747	939	0	0	0	NA	NA	NA	NA
chr1	-	174068496	174069459	1	Olr60	NM_001000748	963	0	0	0	NA	NA	NA	NA
chr1	+	174113481	174114426	1	Olr57	NM_001000749	945	0	0	0	NA	NA	NA	NA
chr9	+	99460791	99461793	1	Olr1353	NM_001000750	1002	8.87066	9.77371	7.96762	0.815209	-0.294758	0.845485	1
chr9	+	99428887	99429847	1	Olr1351	NM_001000751	960	0	0	0	NA	NA	NA	NA
chr9	+	99418212	99419184	1	Olr1350	NM_001000752	972	0	0	0	NA	NA	NA	NA
chr9	-	99345154	99346093	1	Olr1345	NM_001000753	939	0	0	0	NA	NA	NA	NA
chr1	+	237405865	237406804	1	Olr363	NM_001000754	939	0	0	0	NA	NA	NA	NA
chr1	-	237258017	237258932	1	Olr360	NM_001000755	915	0	0	0	NA	NA	NA	NA
chr1	-	237224435	237225368	1	Olr358	NM_001000756	933	0	0	0	NA	NA	NA	NA
chr1	+	237037232	237038156	1	Olr348	NM_001000757	924	0	0	0	NA	NA	NA	NA
chr1	+	237025021	237025945	1	Olr347	NM_001000758	924	0	0	0	NA	NA	NA	NA
chr1	+	236572186	236573149	1	Olr336	NM_001000759	963	0	0	0	NA	NA	NA	NA
chr1	+	236633958	236634905	1	Olr331	NM_001000760	947	0	0	0	NA	NA	NA	NA
chr1	+	235788664	235789603	1	Olr330	NM_001000761	939	0	0	0	NA	NA	NA	NA
chr1	-	235568407	235569343	1	Olr322	NM_001000762	936	0	0	0	NA	NA	NA	NA
chr1	+	220298670	220299606	1	Olr312	NM_001000764	936	0	0	0	NA	NA	NA	NA
chr1	+	220242236	220243169	1	Olr310	NM_001000765	933	0	0	0	NA	NA	NA	NA
chr1	+	220116944	220117877	1	Olr306	NM_001000766	933	0	0	0	NA	NA	NA	NA
chr1	+	219748606	219749536	1	Olr289	NM_001000767	930	0	0	0	NA	NA	NA	NA
chr1	-	71880788	71881730	1	Olr7	NM_001000768	942	0	0	0	NA	NA	NA	NA
chr10	+	44564935	44565862	1	Olr1460	NM_001000769	927	0	0	0	NA	NA	NA	NA
chr10	+	44549521	44550448	1	Olr1459	NM_001000770	927	0	0	0	NA	NA	NA	NA
chr11	+	58662664	58663594	1	Olr1455	NM_001000771	930	0	0	0	NA	NA	NA	NA
chr11	+	58640250	58641177	1	Olr1453	NM_001000772	927	0	0	0	NA	NA	NA	NA
chr10	+	44473426	44474416	1	Olr1452	NM_001000773	990	0	0	0	NA	NA	NA	NA
chr10	+	44439046	44439964	1	Olr1450	NM_001000774	918	0	0	0	NA	NA	NA	NA
chr10	+	44409784	44410705	1	Olr1449	NM_001000775	921	0	0	0	NA	NA	NA	NA
chr10	+	44289551	44290466	1	Olr1442	NM_001000776	915	0	0	0	NA	NA	NA	NA
chr10	-	44153945	44154863	1	Olr1435	NM_001000777	918	0	0	0	NA	NA	NA	NA
chr10	+	44033984	44034932	1	Olr1431	NM_001000778	948	0	0	0	NA	NA	NA	NA
chr10	-	43954414	43955353	1	Olr1424	NM_001000779	939	0	0	0	NA	NA	NA	NA
chr10	-	43888785	43889748	1	Olr1421	NM_001000780	963	0	0	0	NA	NA	NA	NA
chr10	-	43722380	43723388	1	Olr1415	NM_001000781	1008	0	0	0	NA	NA	NA	NA
chr10	-	43704240	43705194	1	Olr1414	NM_001000782	954	0	0	0	NA	NA	NA	NA
chr10	+	36339980	36340913	1	Olr1411	NM_001000783	933	0	0	0	NA	NA	NA	NA
chr10	+	36327196	36327784	1	Olr1410	NM_001000784	588	0	0	0	NA	NA	NA	NA
chr10	+	36289949	36290891	1	Olr1408	NM_001000785	942	0	0	0	NA	NA	NA	NA
chr10	+	36258380	36259292	1	Olr1406	NM_001000786	912	0	0	0	NA	NA	NA	NA
chr10	+	36239003	36239951	1	Olr1404	NM_001000787	948	0	0	0	NA	NA	NA	NA
chr10	+	34340397	34341333	1	Olr1388	NM_001000788	936	0	0	0	NA	NA	NA	NA
chr8	+	61618334	61619282	1	Olr1338	NM_001000789	948	0	0	0	NA	NA	NA	NA
chr8	+	61716593	61717532	1	Olr1331	NM_001000790	939	0	0	0	NA	NA	NA	NA
chr8	-	61737686	61738619	1	Olr1329	NM_001000791	933	0	0	0	NA	NA	NA	NA
chr8	-	61874979	61875912	1	Olr1321	NM_001000792	933	0	0	0	NA	NA	NA	NA
chr8	-	61953021	61953960	1	Olr1316	NM_001000793	939	0	0	0	NA	NA	NA	NA
chr8	+	43395146	43396082	1	Olr1313	NM_001000794	936	0	0	0	NA	NA	NA	NA
chr8	+	43335484	43336417	1	Olr1308	NM_001000795	933	0	0	0	NA	NA	NA	NA
chr8	-	43069804	43070731	1	Olr1303	NM_001000796	1854	0	0	0	NA	NA	NA	NA
chr15	+	39509218	39510178	1	Olr1291	NM_001000797	1920	0	0	0	NA	NA	NA	NA
chr15	+	39564540	39565485	1	Olr1288	NM_001000798	1890	0	0	0	NA	NA	NA	NA
chr15	+	39644665	39645625	1	Olr1286	NM_001000799	960	0	0	0	NA	NA	NA	NA
chr2	-	54558265	54559201	1	Olr1275	NM_001000800	4680	0	0	0	NA	NA	NA	NA
chr2	-	54333150	54334083	1	Olr1274	NM_001000801	5598	0	0	0	NA	NA	NA	NA
chr2	+	54433669	54434605	1	Olr1266	NM_001000802	1872	0	0	0	NA	NA	NA	NA
chr2	+	65171997	65172939	1	Olr1262	NM_001000803	942	0	0	0	NA	NA	NA	NA
chr3	+	165103200	165104142	1	Olr1261	NM_001000804	942	0	0	0	NA	NA	NA	NA
chr3	-	165143199	165144132	1	Olr1253	NM_001000805	2799	0	0	0	NA	NA	NA	NA
chr4	+	1717332	1718265	1	Olr1250	NM_001000806	933	0	0	0	NA	NA	NA	NA
chr4	+	1669412	1670333	1	Olr1247	NM_001000807	1842	0	0	0	NA	NA	NA	NA
chr8	+	42325880	42326813	1	Olr1246	NM_001000808	933	0	0	0	NA	NA	NA	NA
chr4	+	1649705	1650638	1	Olr1245	NM_001000809	933	0	0	0	NA	NA	NA	NA
chr4	+	1642344	1643277	1	Olr1244	NM_001000810	933	0.0895669	0.179134	0	0	#NAME?	1	1
chr4	+	1518196	1519129	1	Olr1239	NM_001000811	1866	0	0	0	NA	NA	NA	NA
chr4	+	1487125	1488061	1	Olr1236	NM_001000812	936	0	0	0	NA	NA	NA	NA
chr4	+	1422262	1423213	1	Olr1231	NM_001000813	951	0	0	0	NA	NA	NA	NA
chr8	+	41242284	41243226	1	Olr1220	NM_001000814	2826	0	0	0	NA	NA	NA	NA
chr8	+	40685777	40686722	1	Olr1213	NM_001000815	945	0	0	0	NA	NA	NA	NA
chr8	+	40518562	40519489	1	Olr1206	NM_001000816	927	0	0	0	NA	NA	NA	NA
chr8	+	40408939	40409869	1	Olr1202	NM_001000817	930	0	0	0	NA	NA	NA	NA
chr8	+	40382357	40383290	1	Olr1201	NM_001000818	933	0	0	0	NA	NA	NA	NA
chr8	+	40281643	40282579	1	Olr1199	NM_001000819	936	0	0	0	NA	NA	NA	NA
chr8	-	40192725	40193655	1	Olr1194	NM_001000820	930	0	0	0	NA	NA	NA	NA
chr5	-	141711462	141712410	1	Olr868	NM_001000821	948	0.179134	0.358268	0	0	#NAME?	0.741796	1
chr5	-	141370085	141371027	1	Olr860	NM_001000822	942	0	0	0	NA	NA	NA	NA
chr3	+	26453660	26454584	1	Olr427	NM_001000823	924	0	0	0	NA	NA	NA	NA
chr3	-	26272599	26273592	1	Olr421	NM_001000824	993	0	0	0	NA	NA	NA	NA
chr3	-	26227290	26228223	1	Olr418	NM_001000825	933	0	0	0	NA	NA	NA	NA
chr3	+	26120363	26121302	1	Olr413	NM_001000826	939	0	0	0	NA	NA	NA	NA
chr3	+	21624977	21625919	1	Olr409	NM_001000827	942	0	0	0	NA	NA	NA	NA
chr3	+	21526196	21527135	1	Olr407	NM_001000828	939	0	0	0	NA	NA	NA	NA
chr3	+	21232909	21233848	1	Olr401	NM_001000829	939	0	0	0	NA	NA	NA	NA
chr3	+	21125861	21126791	1	Olr398	NM_001000830	930	0	0	0	NA	NA	NA	NA
chr3	+	21044751	21045690	1	Olr396	NM_001000831	939	0	0	0	NA	NA	NA	NA
chr15	-	32683621	32684578	1	Olr1642	NM_001000832	957	0	0	0	NA	NA	NA	NA
chr15	-	32595739	32596681	1	Olr1639	NM_001000833	942	0	0	0	NA	NA	NA	NA
chr15	-	32256530	32257466	1	Olr1638	NM_001000834	936	0	0	0	NA	NA	NA	NA
chr15	-	31484033	31484963	1	Olr1633	NM_001000835	930	0	0	0	NA	NA	NA	NA
chr15	-	31434283	31435258	1	Olr1632	NM_001000836	975	0	0	0	NA	NA	NA	NA
chr15	-	31419924	31420899	1	Olr1631	NM_001000837	975	0	0	0	NA	NA	NA	NA
chr15	+	31374817	31375756	1	Olr1622	NM_001000838	939	0	0	0	NA	NA	NA	NA
chr15	+	31217299	31218235	1	Olr1617	NM_001000839	936	0	0	0	NA	NA	NA	NA
chr15	+	31203611	31204860	2	Olr1616	NM_001000840	936	0	0	0	NA	NA	NA	NA
chr15	+	31144625	31145564	1	Olr1614	NM_001000841	939	0	0	0	NA	NA	NA	NA
chr4	+	137372528	137373491	1	Olr821	NM_001000842	963	0	0	0	NA	NA	NA	NA
chr4	+	137339020	137339962	1	Olr819	NM_001000843	942	0	0	0	NA	NA	NA	NA
chr4	+	137200790	137306191	2	Olr818	NM_001000844	909	0	0	0	NA	NA	NA	NA
chr4	+	137264621	137265554	1	Olr816	NM_001000845	933	0	0	0	NA	NA	NA	NA
chr4	+	137200766	137201708	1	Olr813	NM_001000846	942	0	0	0	NA	NA	NA	NA
chr4	+	137178371	137179304	1	Olr812	NM_001000847	933	0	0	0	NA	NA	NA	NA
chr4	+	137124551	137125487	1	Olr811	NM_001000848	936	0	0	0	NA	NA	NA	NA
chr4	+	137084991	137085927	1	Olr809	NM_001000849	936	0	0	0	NA	NA	NA	NA
chr4	+	137065539	137066496	1	Olr808	NM_001000850	957	0	0	0	NA	NA	NA	NA
chr4	+	137034735	137035686	1	Olr807	NM_001000851	951	0	0	0	NA	NA	NA	NA
chr4	-	136752556	136753510	1	Olr804	NM_001000852	954	0	0	0	NA	NA	NA	NA
chr4	-	136693142	136694217	2	Olr803	NM_001000853	939	0	0	0	NA	NA	NA	NA
chr4	+	133592038	133592983	1	Olr799	NM_001000854	945	0	0	0	NA	NA	NA	NA
chr5	+	73741388	73742342	1	Olr844	NM_001000855	954	0	0	0	NA	NA	NA	NA
chr1	+	63478626	63479601	1	Olr386	NM_001000856	975	0	0	0	NA	NA	NA	NA
chr10	-	12598705	12599647	1	Olr1380	NM_001000857	942	0	0	0	NA	NA	NA	NA
chr10	-	12210067	12211030	1	Olr1364	NM_001000858	963	0	0	0	NA	NA	NA	NA
chr8	-	21402840	21403803	1	Olr1192	NM_001000859	963	0	0	0	NA	NA	NA	NA
chr8	+	21051764	21052763	1	Olr1186	NM_001000862	999	0	0	0	NA	NA	NA	NA
chr8	+	20801781	20802711	1	Olr1179	NM_001000864	930	0	0	0	NA	NA	NA	NA
chr8	+	20339315	20340254	1	Olr1166	NM_001000867	939	0	0	0	NA	NA	NA	NA
chr8	+	20303386	20304316	1	Olr1165	NM_001000868	930	0	0	0	NA	NA	NA	NA
chr8	-	20245473	20246412	1	Olr1163	NM_001000869	939	0	0	0	NA	NA	NA	NA
chr8	+	20128072	20129002	1	Olr1162	NM_001000870	930	0	0	0	NA	NA	NA	NA
chr8	+	20052080	20053010	1	Olr1159	NM_001000871	930	0	0	0	NA	NA	NA	NA
chr8	-	19994808	19995750	1	Olr1158	NM_001000872	942	0	0	0	NA	NA	NA	NA
chr8	+	19889932	19890871	1	Olr1156	NM_001000873	939	0	0	0	NA	NA	NA	NA
chr8	-	19654353	19655325	1	Olr1149	NM_001000874	972	0	0	0	NA	NA	NA	NA
chr8	+	19614771	19615710	1	Olr1148	NM_001000875	939	0	0	0	NA	NA	NA	NA
chr8	-	19400510	19401449	1	Olr1144	NM_001000876	939	0	0	0	NA	NA	NA	NA
chr8	+	19342730	19343669	1	Olr1142	NM_001000877	939	0	0	0	NA	NA	NA	NA
chr8	-	18035706	18036645	1	Olr1135	NM_001000878	1878	0	0	0	NA	NA	NA	NA
chr8	+	19061174	19062137	1	Olr1129	NM_001000879	963	0	0	0	NA	NA	NA	NA
chr8	-	18978174	18979113	1	Olr1126	NM_001000880	939	0	0	0	NA	NA	NA	NA
chr8	+	18913854	18914793	1	Olr1125	NM_001000881	939	0	0	0	NA	NA	NA	NA
chr8	-	18828764	18829703	1	Olr1122	NM_001000882	939	0	0	0	NA	NA	NA	NA
chr8	-	17935047	17936013	1	Olr1118	NM_001000883	966	0	0	0	NA	NA	NA	NA
chr8	-	17908499	17909438	1	Olr1117	NM_001000884	939	0	0	0	NA	NA	NA	NA
chr8	-	17847628	17848567	1	Olr1115	NM_001000885	939	0	0	0	NA	NA	NA	NA
chr20	+	1195344	1196283	1	Olr1710	NM_001000886	939	0	0	0	NA	NA	NA	NA
chr20	+	1006926	1007865	1	Olr1705	NM_001000887	1878	0	0	0	NA	NA	NA	NA
chr20	-	804837	805806	1	Olr1692	NM_001000888	969	0	0	0	NA	NA	NA	NA
chr20	-	737358	738330	1	Olr1689	NM_001000889	1944	0	0	0	NA	NA	NA	NA
chr20	-	512091	513030	1	Olr1682	NM_001000890	939	0	0	0	NA	NA	NA	NA
chr20	-	482885	483929	1	Olr1680	NM_001000891	1044	0	0	0	NA	NA	NA	NA
chr20	-	34403	35342	1	Olr1679	NM_001000892	1878	0	0	0	NA	NA	NA	NA
chr20	-	456638	457577	1	Olr1678	NM_001000893	939	0	0	0	NA	NA	NA	NA
chr20	-	421640	427304	3	Olr1675	NM_001000894	939	0	0	0	NA	NA	NA	NA
chr20	+	372136	373075	1	Olr1670	NM_001000895	939	0	0	0	NA	NA	NA	NA
chr20	-	3622611	3623545	2	Olr1726	NM_001000896	930	0	0	0	NA	NA	NA	NA
chr5	-	63801774	63802722	1	Olr837	NM_001000897	948	0	0	0	NA	NA	NA	NA
chr4	-	214647989	214648922	1	Olr832	NM_001000898	933	0	0	0	NA	NA	NA	NA
chr4	-	214627157	214628090	1	Olr831	NM_001000899	933	0	0	0	NA	NA	NA	NA
chr4	+	214602413	214603376	1	Olr830	NM_001000900	963	0	0	0	NA	NA	NA	NA
chr4	+	214586686	214587670	1	Olr829	NM_001000901	984	0	0	0	NA	NA	NA	NA
chr4	+	214527378	214528362	1	Olr827	NM_001000902	984	0	0	0	NA	NA	NA	NA
chr4	+	214505620	214506604	1	Olr826	NM_001000903	984	0	0	0	NA	NA	NA	NA
chr4	+	214485502	214486486	1	Olr825	NM_001000904	984	0	0	0	NA	NA	NA	NA
chr4	+	214460596	214461580	1	Olr824	NM_001000905	984	0	0	0	NA	NA	NA	NA
chr7	-	139072443	139073403	1	Olr1104	NM_001000906	960	0	0	0	NA	NA	NA	NA
chr11	+	88212443	88213388	1	Olr1565	NM_001000908	945	0	0	0	NA	NA	NA	NA
chr13	+	96971815	96972793	1	Olr1602	NM_001000909	978	0	0	0	NA	NA	NA	NA
chr13	+	96878515	96879448	1	Olr1598	NM_001000910	933	0	0	0	NA	NA	NA	NA
chr13	-	96862490	96863432	1	Olr1597	NM_001000911	942	0	0	0	NA	NA	NA	NA
chr13	+	96715028	96715979	1	Olr1591	NM_001000912	951	0	0	0	NA	NA	NA	NA
chr13	+	96653318	96654257	1	Olr1587	NM_001000913	939	0.681172	0	1.36234	Inf	Inf	0.161902	0.561659
chr2	-	229049043	229049994	1	Olr392	NM_001000914	951	0	0	0	NA	NA	NA	NA
chr3	-	109991823	109992762	1	Olr790	NM_001000915	939	0	0	0	NA	NA	NA	NA
chr3	+	109840189	109841125	1	Olr786	NM_001000916	1872	0	0	0	NA	NA	NA	NA
chr3	-	109719344	109720283	1	Olr779	NM_001000917	939	0	0	0	NA	NA	NA	NA
chr3	-	109587028	109587967	1	Olr774	NM_001000918	939	0	0	0	NA	NA	NA	NA
chr3	-	109396873	109397812	1	Olr768	NM_001000919	939	0	0	0	NA	NA	NA	NA
chr3	+	109149642	109150560	1	Olr753	NM_001000921	918	0	0	0	NA	NA	NA	NA
chr3	-	85724082	85725012	1	Olr735	NM_001000922	930	0	0	0	NA	NA	NA	NA
chr3	-	85083304	85084258	1	Olr714	NM_001000923	954	0	0	0	NA	NA	NA	NA
chr3	-	84281972	84282908	1	Olr666	NM_001000924	936	0	0	0	NA	NA	NA	NA
chr3	+	84176021	84176948	1	Olr661	NM_001000925	927	0	0	0	NA	NA	NA	NA
chr3	-	83203686	83204643	1	Olr611	NM_001000926	957	0	0	0	NA	NA	NA	NA
chr3	+	82948481	82949423	1	Olr606	NM_001000927	942	0	0	0	NA	NA	NA	NA
chr3	+	82563116	82564049	1	Olr583	NM_001000928	933	0	0	0	NA	NA	NA	NA
chr3	+	81972339	81973263	1	Olr556	NM_001000929	924	0	0	0	NA	NA	NA	NA
chr3	+	80968598	80969525	1	Olr520	NM_001000930	927	0	0	0	NA	NA	NA	NA
chr3	-	80369654	80370596	1	Olr499	NM_001000931	1884	0	0	0	NA	NA	NA	NA
chr3	-	80287855	80288794	1	Olr491	NM_001000932	1878	0	0	0	NA	NA	NA	NA
chr3	-	80275829	80276771	1	Olr490	NM_001000933	1884	0	0	0	NA	NA	NA	NA
chr3	+	79804149	79805103	1	Olr463	NM_001000934	954	0	0	0	NA	NA	NA	NA
chr1	+	170920698	170921607	1	Olr36	NM_001000935	909	0	0	0	NA	NA	NA	NA
chr1	-	156480590	156481532	1	Olr27	NM_001000936	942	0	0	0	NA	NA	NA	NA
chr1	-	155984556	155985513	1	Olr17	NM_001000937	1914	0	0	0	NA	NA	NA	NA
chr7	-	5924681	5925602	1	Olr995	NM_001000938	921	0	0	0	NA	NA	NA	NA
chr7	-	5158513	5159449	1	Olr894	NM_001000940	936	0	0	0	NA	NA	NA	NA
chr7	-	13664402	13665332	1	Olr1077	NM_001000941	930	0	0	0	NA	NA	NA	NA
chr10	-	60365173	60422804	2	Olr1500	NM_001000942	939	0	0	0	NA	NA	NA	NA
chr10	-	59862905	59863844	1	Olr1474	NM_001000943	1878	0	0	0	NA	NA	NA	NA
chr10	+	59782496	59783432	1	Olr1472	NM_001000944	936	0	0	0	NA	NA	NA	NA
chr11	-	48855799	48856729	1	Olr1535	NM_001000945	930	0	0	0	NA	NA	NA	NA
chr1	+	179588307	179589240	1	Olr260	NM_001000946	933	0	0	0	NA	NA	NA	NA
chr1	-	179473924	179474896	1	Olr255	NM_001000947	972	0	0	0	NA	NA	NA	NA
chr1	-	177048518	177049469	1	Olr194	NM_001000948	951	0	0	0	NA	NA	NA	NA
chr1	-	176857033	176857972	1	Olr179	NM_001000949	939	0	0	0	NA	NA	NA	NA
chr1	+	175820753	175821713	1	Olr162	NM_001000950	1920	0	0	0	NA	NA	NA	NA
chr1	-	174877832	174878777	1	Olr114	NM_001000951	945	0	0	0	NA	NA	NA	NA
chr1	-	174811689	174812643	1	Olr109	NM_001000952	954	0	0	0	NA	NA	NA	NA
chr9	+	99441999	99442968	1	Olr1352	NM_001000953	969	0	0	0	NA	NA	NA	NA
chr1	+	236873475	236874435	1	Olr339	NM_001000954	960	0	0	0	NA	NA	NA	NA
chr1	+	220181280	220182213	1	Olr308	NM_001000955	933	0	0	0	NA	NA	NA	NA
chr10	+	44490658	44491651	1	Olr1456	NM_001000956	993	0	0	0	NA	NA	NA	NA
chr11	+	58640250	58641165	1	Olr1451	NM_001000957	915	0	0	0	NA	NA	NA	NA
chr10	+	44329792	44330713	1	Olr1445	NM_001000958	1842	0	0	0	NA	NA	NA	NA
chr8	-	43235445	43236399	1	Olr1305	NM_001000959	954	0	0	0	NA	NA	NA	NA
chr15	+	39468329	39469241	1	Olr1292	NM_001000960	1824	0	0	0	NA	NA	NA	NA
chr2	-	54654819	54655767	1	Olr1279	NM_001000961	2844	0	0	0	NA	NA	NA	NA
chr3	+	165062991	165063924	1	Olr1260	NM_001000962	2799	0	0	0	NA	NA	NA	NA
chr4	+	1501580	1502510	1	Olr1237	NM_001000963	1860	0	0	0	NA	NA	NA	NA
chr4	+	1362652	1363594	1	Olr1228	NM_001000964	2826	0	0	0	NA	NA	NA	NA
chr8	+	41237364	41238318	1	Olr1219	NM_001000965	2862	0	0	0	NA	NA	NA	NA
chr8	+	40341166	40342102	1	Olr1200	NM_001000966	936	0	0	0	NA	NA	NA	NA
chr3	+	26238849	26239797	1	Olr419	NM_001000968	948	0	0	0	NA	NA	NA	NA
chr3	+	21631828	21632762	1	Olr410	NM_001000969	934	0	0	0	NA	NA	NA	NA
chr15	-	31484021	31485008	1	Olr1635	NM_001000970	987	0	0	0	NA	NA	NA	NA
chr15	-	30728503	30729433	1	Olr1625	NM_001000971	930	0	0	0	NA	NA	NA	NA
chr15	-	30957799	30958780	1	Olr1609	NM_001000973	981	0	0	0	NA	NA	NA	NA
chr4	+	137358110	137359073	1	Olr820	NM_001000974	963	0	0	0	NA	NA	NA	NA
chr4	+	137099937	137100870	1	Olr810	NM_001000975	933	0	0	0	NA	NA	NA	NA
chr4	+	137016074	137017297	2	Olr806	NM_001000976	954	0	0	0	NA	NA	NA	NA
chr4	-	136681937	136682879	1	Olr802	NM_001000977	942	0	0	0	NA	NA	NA	NA
chr10	-	12452106	12453048	1	Olr1374	NM_001000978	942	0	0	0	NA	NA	NA	NA
chr10	-	12346085	12347027	1	Olr1370	NM_001000979	942	0	0	0	NA	NA	NA	NA
chr10	-	12291983	12292928	1	Olr1366	NM_001000980	945	0	0	0	NA	NA	NA	NA
chr8	+	21335427	21336355	1	Olr1191	NM_001000981	928	0	0	0	NA	NA	NA	NA
chr8	+	21236330	21237299	1	Olr1185	NM_001000982	969	0	0	0	NA	NA	NA	NA
chr8	-	20515563	20516559	1	Olr1172	NM_001000983	996	0	0	0	NA	NA	NA	NA
chr8	+	20286413	20287355	1	Olr1164	NM_001000984	942	0	0	0	NA	NA	NA	NA
chr8	+	20074285	20075215	1	Olr1160	NM_001000985	930	0	0	0	NA	NA	NA	NA
chr8	-	19087685	19088654	1	Olr1132	NM_001000986	969	0	0	0	NA	NA	NA	NA
chr8	+	18994693	18995629	1	Olr1128	NM_001000987	936	0	0	0	NA	NA	NA	NA
chr8	-	18184534	18185482	1	Olr1119	NM_001000988	948	0.0895669	0.179134	0	0	#NAME?	1	1
chr4	+	214561229	214562213	1	Olr828	NM_001000991	984	0	0	0	NA	NA	NA	NA
chr4	+	214423985	214424912	1	Olr823	NM_001000992	927	0	0	0	NA	NA	NA	NA
chr7	+	139197536	139198472	1	Olr1108	NM_001000993	936	0	0	0	NA	NA	NA	NA
chr13	+	96695076	96696024	1	Olr1590	NM_001000995	948	0	0	0	NA	NA	NA	NA
chr3	-	109337215	109338154	1	Olr766	NM_001000996	939	0	0	0	NA	NA	NA	NA
chr3	-	84776600	84777536	1	Olr689	NM_001000997	936	0	0	0	NA	NA	NA	NA
chr7	+	13574685	13575621	1	Olr1073	NM_001000998	936	0	0	0	NA	NA	NA	NA
chr1	+	179645160	179646090	2	Olr264	NM_001000999	922	0	0	0	NA	NA	NA	NA
chr1	+	175806970	175807930	1	Olr161	NM_001001000	1920	0	0	0	NA	NA	NA	NA
chr1	+	173944068	173945013	1	Olr46	NM_001001001	945	0	0	0	NA	NA	NA	NA
chr10	-	43802202	43803132	1	Olr1417	NM_001001002	930	0	0	0	NA	NA	NA	NA
chr15	+	31180317	31181253	1	Olr1615	NM_001001003	936	0	0	0	NA	NA	NA	NA
chr4	-	136670499	136671500	2	Olr801	NM_001001004	942	0	0	0	NA	NA	NA	NA
chr8	-	20471167	20472106	1	Olr1171	NM_001001005	939	0	0	0	NA	NA	NA	NA
chr20	-	498027	498966	1	Olr1681	NM_001001006	939	0	0	0	NA	NA	NA	NA
chr17	-	57676502	57677453	1	Olr1664	NM_001001007	951	0	0	0	NA	NA	NA	NA
chr1	-	174145936	174146881	1	Olr53	NM_001001008	945	0	0	0	NA	NA	NA	NA
chr11	+	46918786	46919740	1	Olr1560	NM_001001009	1908	0	0	0	NA	NA	NA	NA
chr1	-	180431277	180432222	1	Olr283	NM_001001010	945	0	0	0	NA	NA	NA	NA
chr10	+	36250466	36251390	1	Olr1405	NM_001001012	924	0	0	0	NA	NA	NA	NA
chr4	+	1513027	1513957	1	Olr1238	NM_001001013	1860	0	0	0	NA	NA	NA	NA
chr3	+	21294630	21295569	1	Olr402	NM_001001014	939	0	0	0	NA	NA	NA	NA
chr15	-	30851102	30852037	1	Olr1629	NM_001001015	935	0	0	0	NA	NA	NA	NA
chr8	+	20608968	20609964	1	Olr1174	NM_001001016	996	0	0	0	NA	NA	NA	NA
chr8	+	19342730	19343669	1	Olr1143	NM_001001017	939	0	0	0	NA	NA	NA	NA
chr2	+	4799031	4799982	1	Olr205	NM_001001018	951	0.117635	0.235271	0	0	#NAME?	1	1
chr1	-	237074398	237075322	1	Olr349	NM_001001019	924	0	0	0	NA	NA	NA	NA
chr4	+	1699135	1700068	1	Olr1249	NM_001001020	933	0	0	0	NA	NA	NA	NA
chr1	+	172493293	172494244	1	Olr51	NM_001001021	1902	0	0	0	NA	NA	NA	NA
chr1	-	174060378	174061341	1	Olr61	NM_001001022	963	0	0	0	NA	NA	NA	NA
chr1	-	174643033	174644005	1	Olr94	NM_001001023	972	0	0	0	NA	NA	NA	NA
chr1	-	174651339	174652284	1	Olr95	NM_001001024	945	0	0	0	NA	NA	NA	NA
chr1	+	174661920	174662877	1	Olr96	NM_001001025	957	0	0	0	NA	NA	NA	NA
chr1	-	175065023	175065971	1	Olr127	NM_001001026	948	0	0	0	NA	NA	NA	NA
chr1	-	175193579	175194515	1	Olr129	NM_001001027	936	0	0	0	NA	NA	NA	NA
chr1	-	176061823	176062780	1	Olr174	NM_001001028	957	0	0	0	NA	NA	NA	NA
chr1	-	176087086	176088052	1	Olr175	NM_001001029	966	0	0	0	NA	NA	NA	NA
chr1	-	176894258	176895197	1	Olr181	NM_001001030	939	0	0	0	NA	NA	NA	NA
chr1	+	176932153	176933095	1	Olr186	NM_001001031	942	0	0	0	NA	NA	NA	NA
chr1	+	176959216	176960155	1	Olr188	NM_001001032	939	0	0	0	NA	NA	NA	NA
chr1	+	177117624	177118590	1	Olr198	NM_001001033	966	0	0	0	NA	NA	NA	NA
chr1	+	177133479	177134430	1	Olr199	NM_001001034	951	0.104038	0	0.208076	Inf	Inf	0.977633	1
chr1	-	178200624	178201572	1	Olr232	NM_001001035	948	0	0	0	NA	NA	NA	NA
chr1	+	179344325	179345273	1	Olr250	NM_001001037	948	0	0	0	NA	NA	NA	NA
chr1	-	179540470	179541415	1	Olr257	NM_001001038	945	0	0	0	NA	NA	NA	NA
chr1	+	220055033	220055966	1	Olr304	NM_001001039	933	0	0	0	NA	NA	NA	NA
chr1	+	220321114	220322050	1	Olr313	NM_001001040	936	0	0	0	NA	NA	NA	NA
chr1	+	236597408	236598350	1	Olr334	NM_001001041	942	0	0	0	NA	NA	NA	NA
chr1	-	236913042	236913963	1	Olr341	NM_001001042	921	0	0	0	NA	NA	NA	NA
chr1	+	236971589	236972525	1	Olr344	NM_001001043	936	0	0	0	NA	NA	NA	NA
chr1	+	237175464	237176418	1	Olr354	NM_001001045	954	0	0	0	NA	NA	NA	NA
chr1	+	237442855	237443800	1	Olr365	NM_001001046	945	0	0	0	NA	NA	NA	NA
chr1	+	237511152	237512088	1	Olr367	NM_001001047	936	0	0	0	NA	NA	NA	NA
chr1	+	237660220	237661171	1	Olr372	NM_001001048	951	0	0	0	NA	NA	NA	NA
chr3	+	79566007	79566952	1	Olr445	NM_001001049	945	0	0	0	NA	NA	NA	NA
chr3	+	79571308	79572253	1	Olr446	NM_001001050	945	0	0	0	NA	NA	NA	NA
chr3	-	81194442	81195387	1	Olr531	NM_001001051	945	0	0	0	NA	NA	NA	NA
chr3	-	81518428	81519367	1	Olr544	NM_001001052	939	0	0	0	NA	NA	NA	NA
chr3	-	81556815	81557781	1	Olr545	NM_001001053	1932	0	0	0	NA	NA	NA	NA
chr3	-	81832855	81833794	1	Olr546	NM_001001054	939	0	0	0	NA	NA	NA	NA
chr3	-	81883862	81884801	1	Olr552	NM_001001055	939	0	0	0	NA	NA	NA	NA
chr3	+	82750231	82751158	1	Olr596	NM_001001056	927	0	0	0	NA	NA	NA	NA
chr3	-	83401428	83402379	1	Olr629	NM_001001058	951	0	0	0	NA	NA	NA	NA
chr3	-	83413763	83414702	1	Olr630	NM_001001059	939	0	0	0	NA	NA	NA	NA
chr3	+	84165235	84166168	1	Olr662	NM_001001060	933	0	0	0	NA	NA	NA	NA
chr3	-	84372722	84373658	1	Olr671	NM_001001061	936	0	0	0	NA	NA	NA	NA
chr3	-	84615330	84616263	1	Olr677	NM_001001062	933	0	0	0	NA	NA	NA	NA
chr3	-	84914722	84915643	1	Olr696	NM_001001063	921	0	0	0	NA	NA	NA	NA
chr3	-	84937576	84938500	1	Olr697	NM_001001064	924	0.0895669	0.179134	0	0	#NAME?	1	1
chr3	-	85207876	85208801	2	Olr707	NM_001001065	924	0	0	0	NA	NA	NA	NA
chr3	-	85239793	85240738	1	Olr709	NM_001001066	945	0	0	0	NA	NA	NA	NA
chr3	-	85430905	85431835	1	Olr720	NM_001001067	930	0	0	0	NA	NA	NA	NA
chr3	-	109031169	109032108	1	Olr747	NM_001001068	939	0	0	0	NA	NA	NA	NA
chr3	-	109267534	109268473	1	Olr760	NM_001001069	939	0	0	0	NA	NA	NA	NA
chr5	-	141388948	141389890	1	Olr862	NM_001001071	942	0	0	0	NA	NA	NA	NA
chr7	-	6746485	6747430	1	Olr964	NM_001001073	1890	0	0	0	NA	NA	NA	NA
chr7	-	4284406	4285342	1	Olr984	NM_001001074	1872	0	0	0	NA	NA	NA	NA
chr7	-	7636797	7637736	1	Olr1022	NM_001001075	939	0	0	0	NA	NA	NA	NA
chr7	+	9454708	9455647	1	Olr1064	NM_001001076	1878	0	0	0	NA	NA	NA	NA
chr7	-	9599914	9600862	1	Olr1068	NM_001001077	948	0	0	0	NA	NA	NA	NA
chr7	-	139096883	139097801	1	Olr1105	NM_001001078	918	0	0	0	NA	NA	NA	NA
chr8	-	18108071	18109001	1	Olr1137	NM_001001079	1860	0	0	0	NA	NA	NA	NA
chr8	-	18121413	18122355	1	Olr1138	NM_001001080	1884	0	0	0	NA	NA	NA	NA
chr8	-	40219890	40220820	1	Olr1195	NM_001001081	930	0	0	0	NA	NA	NA	NA
chr8	+	40445289	40446237	1	Olr1203	NM_001001082	948	0	0	0	NA	NA	NA	NA
chr8	+	41326168	41327152	1	Olr1225	NM_001001083	1968	0	0	0	NA	NA	NA	NA
chr4	+	1452945	1454275	2	Olr1233	NM_001001084	942	0	0	0	NA	NA	NA	NA
chr3	-	165147939	165148872	1	Olr1254	NM_001001085	2799	0	0	0	NA	NA	NA	NA
chr3	+	165176045	165177094	2	Olr1256	NM_001001086	1866	0	0	0	NA	NA	NA	NA
chr8	-	42417402	42418292	1	Olr1318	NM_001001087	890	0	0	0	NA	NA	NA	NA
chr9	-	99323600	99324539	1	Olr1343	NM_001001088	939	0	0	0	NA	NA	NA	NA
chr10	+	34406242	34407172	1	Olr1391	NM_001001089	930	0	0	0	NA	NA	NA	NA
chr10	+	34420223	34421159	1	Olr1392	NM_001001090	936	0	0	0	NA	NA	NA	NA
chr10	+	34446334	34447264	1	Olr1394	NM_001001091	930	0	0	0	NA	NA	NA	NA
chr10	+	34465827	34466757	1	Olr1395	NM_001001092	930	0	0	0	NA	NA	NA	NA
chr10	+	34485827	34486763	1	Olr1396	NM_001001093	936	0	0	0	NA	NA	NA	NA
chr10	+	34499894	34500827	1	Olr1397	NM_001001094	933	0	0	0	NA	NA	NA	NA
chr10	+	34529248	34530184	1	Olr1399	NM_001001095	936	0	0	0	NA	NA	NA	NA
chr10	+	34529248	34530184	1	Olr1400	NM_001001096	936	0	0	0	NA	NA	NA	NA
chr10	-	45679819	45680776	1	Olr1462	NM_001001097	957	0	0	0	NA	NA	NA	NA
chr10	+	62140915	62141887	1	Olr1515	NM_001001098	972	0	0	0	NA	NA	NA	NA
chr11	+	46333874	46334795	1	Olr1528	NM_001001099	921	0	0	0	NA	NA	NA	NA
chr11	+	46343130	46344051	1	Olr1529	NM_001001100	921	0	0	0	NA	NA	NA	NA
chr11	+	46351499	46352417	1	Olr1530	NM_001001101	918	0	0	0	NA	NA	NA	NA
chr11	+	46370654	46371576	2	Olr1531	NM_001001102	918	0	0	0	NA	NA	NA	NA
chr11	+	46385565	46386483	1	Olr1532	NM_001001103	918	0	0	0	NA	NA	NA	NA
chr11	+	46581086	46582007	1	Olr1543	NM_001001104	921	0	0	0	NA	NA	NA	NA
chr11	+	46618150	46619073	1	Olr1545	NM_001001105	923	0	0	0	NA	NA	NA	NA
chr11	+	46641452	46642376	1	Olr1546	NM_001001106	924	0	0	0	NA	NA	NA	NA
chr11	+	46652157	46653081	1	Olr1547	NM_001001107	924	0	0	0	NA	NA	NA	NA
chr11	+	46663106	46664030	1	Olr1548	NM_001001108	924	0	0	0	NA	NA	NA	NA
chr13	+	96631729	96640658	2	Olr1585	NM_001001109	939	0.504214	0.456584	0.551844	1.20864	0.273381	1	1
chr20	-	831645	832590	1	Olr1694	NM_001001110	945	1.28523	2.10795	0.46252	0.219417	-2.18825	0.197805	0.616724
chr20	-	1052060	1053026	1	Olr1697	NM_001001111	966	0	0	0	NA	NA	NA	NA
chr20	-	1076375	1077341	1	Olr1699	NM_001001112	966	0	0	0	NA	NA	NA	NA
chr20	-	964116	1053026	3	Olr1700	NM_001001113	1932	0	0	0	NA	NA	NA	NA
chr20	-	1095325	1096282	1	Olr1701	NM_001001114	957	0	0	0	NA	NA	NA	NA
chr20	+	1038038	1038977	1	Olr1707	NM_001001115	1878	0	0	0	NA	NA	NA	NA
chr20	-	3573834	3574735	1	Olr1720	NM_001001116	901	0	0	0	NA	NA	NA	NA
chr20	-	3591848	3592778	1	Olr1722	NM_001001117	930	0	0	0	NA	NA	NA	NA
chr20	+	3780133	3781075	1	Olr1734	NM_001001119	942	0	0	0	NA	NA	NA	NA
chr8	+	40258837	40259770	1	Olr1197	NM_001001120	933	0	0	0	NA	NA	NA	NA
chr9	+	99400124	99401096	1	Olr1347	NM_001001121	972	0	0	0	NA	NA	NA	NA
chr17	-	4938056	4938983	1	Olr1652	NM_001001122	927	0	0	0	NA	NA	NA	NA
chr3	+	79558560	79559505	1	Olr444	NM_001001123	945	0	0	0	NA	NA	NA	NA
chr3	+	79871126	79872065	1	Olr468	NM_001001124	939	0	0	0	NA	NA	NA	NA
chr3	+	79913002	79913941	1	Olr471	NM_001001125	939	0	0	0	NA	NA	NA	NA
chr3	+	83970904	83971834	1	Olr637	NM_001001126	1860	0	0	0	NA	NA	NA	NA
chr1	-	174334418	174335360	1	Olr70	NM_001001269	942	0	0	0	NA	NA	NA	NA
chr1	-	174456248	174457202	1	Olr80	NM_001001270	954	0	0	0	NA	NA	NA	NA
chr1	+	174467183	174468122	1	Olr81	NM_001001271	939	0	0	0	NA	NA	NA	NA
chr1	-	175202159	175203083	1	Olr130	NM_001001272	924	0	0	0	NA	NA	NA	NA
chr1	+	175230192	175231140	1	Olr132	NM_001001273	948	0	0	0	NA	NA	NA	NA
chr1	-	175363242	175364193	1	Olr141	NM_001001274	951	0	0	0	NA	NA	NA	NA
chr1	+	237692221	237693172	1	Olr373	NM_001001275	951	0	0	0	NA	NA	NA	NA
chr1	-	237787241	237788186	1	Olr377	NM_001001276	945	0	0	0	NA	NA	NA	NA
chr1	-	237824453	237825401	1	Olr380	NM_001001277	948	0	0	0	NA	NA	NA	NA
chr1	-	237867609	237868554	1	Olr382	NM_001001278	945	0	0	0	NA	NA	NA	NA
chr1	+	174292074	174293013	1	Olr67	NM_001001279	939	0	0	0	NA	NA	NA	NA
chr1	-	174317932	174318871	1	Olr69	NM_001001280	939	0	0	0	NA	NA	NA	NA
chr1	+	174379606	174380566	1	Olr75	NM_001001281	960	0	0	0	NA	NA	NA	NA
chr1	-	174482569	174483514	1	Olr82	NM_001001282	945	0	0	0	NA	NA	NA	NA
chr1	+	175305612	175306578	1	Olr137	NM_001001283	966	0	0	0	NA	NA	NA	NA
chr1	-	174350680	174351688	1	Olr72	NM_001001284	1008	0	0	0	NA	NA	NA	NA
chr1	-	175212353	175213277	1	Olr131	NM_001001285	924	0	0	0	NA	NA	NA	NA
chr1	-	237802714	237803677	1	Olr378	NM_001001286	963	0	0	0	NA	NA	NA	NA
chr1	+	174398180	174399131	1	Olr77	NM_001001287	951	0	0	0	NA	NA	NA	NA
chr1	+	175271307	175272246	1	Olr135	NM_001001288	939	0	0	0	NA	NA	NA	NA
chr1	+	237714075	237715032	1	Olr374	NM_001001289	957	0	0	0	NA	NA	NA	NA
chr10	+	60689735	60731890	2	Olr1512	NM_001001350	931	0	0	0	NA	NA	NA	NA
chr10	-	60818114	60819062	1	Olr1517	NM_001001351	948	0	0	0	NA	NA	NA	NA
chr11	+	46496673	46497594	1	Olr1537	NM_001001352	921	0	0	0	NA	NA	NA	NA
chr11	-	48873691	48874621	1	Olr1536	NM_001001353	930	0	0	0	NA	NA	NA	NA
chr4	+	13627434	13628370	1	Olr917	NM_001001354	1872	0	0	0	NA	NA	NA	NA
chr1	+	13352006	13352945	1	Olr905	NM_001001355	2817	0	0	0	NA	NA	NA	NA
chr7	+	5532760	5533680	1	Olr920	NM_001001356	920	0	0	0	NA	NA	NA	NA
chr7	-	4056514	4057450	1	Olr907	NM_001001357	936	0	0	0	NA	NA	NA	NA
chr7	+	5767586	5770347	2	Olr883	NM_001001358	936	0	0	0	NA	NA	NA	NA
chr7	+	5767586	5770347	2	Olr910	NM_001001359	936	0	0	0	NA	NA	NA	NA
chr7	+	4512892	4513848	3	Olr908	NM_001001360	953	0	0	0	NA	NA	NA	NA
chr7	+	5511278	5512214	1	Olr903	NM_001001361	936	0	0	0	NA	NA	NA	NA
chr7	+	16526591	16527572	1	Olr1059	NM_001001362	981	0	0	0	NA	NA	NA	NA
chr7	-	8989142	8990076	2	Olr1052	NM_001001363	933	0	0	0	NA	NA	NA	NA
chr7	-	9289349	9290285	1	Olr1051	NM_001001364	936	0	0	0	NA	NA	NA	NA
chr7	+	8318355	8319250	1	Olr1049	NM_001001365	895	0	0	0	NA	NA	NA	NA
chr7	-	7856879	7857818	1	Olr1029	NM_001001366	939	0	0	0	NA	NA	NA	NA
chr7	-	16596137	16597078	1	Olr936	NM_001001367	941	0	0	0	NA	NA	NA	NA
chr7	+	7935968	7936907	1	Olr943	NM_001001368	1874	0	0	0	NA	NA	NA	NA
chr7	+	7559422	7560266	1	Olr947	NM_001001369	844	0	0	0	NA	NA	NA	NA
chr7	-	7719275	7720253	1	Olr950	NM_001001370	978	0	0	0	NA	NA	NA	NA
chr7	+	6323015	6323954	1	Olr1002	NM_001001371	939	0	0	0	NA	NA	NA	NA
chr1	-	177936805	177937729	1	Olr219	NM_001001372	924	0	0	0	NA	NA	NA	NA
chr20	-	621865	622819	1	Olr1686	NM_001001373	1908	0	0	0	NA	NA	NA	NA
chr20	+	1108082	1109036	1	Olr1702	NM_001001374	954	0	0	0	NA	NA	NA	NA
chr3	+	81061813	81062779	1	Olr526	NM_001001375	966	0	0	0	NA	NA	NA	NA
chr3	+	81173843	81174809	1	Olr530	NM_001001376	966	0	0	0	NA	NA	NA	NA
chr3	+	81949177	81950158	1	Olr555	NM_001001377	981	0	0	0	NA	NA	NA	NA
chr3	+	84717234	84718152	1	Olr684	NM_001001378	918	0	0	0	NA	NA	NA	NA
chr7	-	15694927	15872712	2	Olr1090	NM_001001379	957	0	0	0	NA	NA	NA	NA
chr7	-	15871755	15872712	1	Olr1092	NM_001001380	957	0	0	0	NA	NA	NA	NA
chr7	-	6875568	6876507	1	Olr956	NM_001001381	939	0	0	0	NA	NA	NA	NA
chr7	-	5924657	5925602	1	Olr886	NM_001001382	945	0	0	0	NA	NA	NA	NA
chr11	+	46516168	46517098	1	Olr1540	NM_001001383	930	0	0	0	NA	NA	NA	NA
chr3	-	85732206	85733136	1	Olr736	NM_001001384	930	0	0	0	NA	NA	NA	NA
chr7	-	16199056	16199992	1	Olr921	NM_001001385	936	0	0	0	NA	NA	NA	NA
chr7	-	16596142	16597078	1	Olr932	NM_001001386	936	0	0	0	NA	NA	NA	NA
chr7	-	8916634	8917570	1	Olr937	NM_001001387	936	0	0	0	NA	NA	NA	NA
chr7	-	15871755	15872712	1	Olr1093	NM_001001388	957	0	0	0	NA	NA	NA	NA
chr20	+	3793456	3794383	1	Olr1735	NM_001001397	927	0	0	0	NA	NA	NA	NA
chr20	+	3808598	3809712	2	Olr1736	NM_001001421	927	0	0	0	NA	NA	NA	NA
chr20	+	3825495	3826422	1	Olr1737	NM_001001422	927	0	0	0	NA	NA	NA	NA
chr20	+	3851240	3852170	1	Olr1739	NM_001001423	930	0	0	0	NA	NA	NA	NA
chr20	+	3879841	3880771	1	Olr1742	NM_001001424	930	0	0	0	NA	NA	NA	NA
chr20	-	3886816	3887758	1	Olr1743	NM_001001425	942	0	0	0	NA	NA	NA	NA
chr20	+	3902889	3903828	1	Olr1744	NM_001001426	939	0	0	0	NA	NA	NA	NA
chr20	+	3931253	3932192	1	Olr1746	NM_001001427	939	0	0	0	NA	NA	NA	NA
chr20	+	3972180	3973121	2	Olr1748	NM_001001428	939	0	0	0	NA	NA	NA	NA
chr20	+	3977728	3978667	1	Olr1749	NM_001001429	939	0	0	0	NA	NA	NA	NA
chr12	+	27273681	27380402	27	Gtf2ird1	NM_001001504	3110	35.0778	30.0543	40.1013	1.33429	0.416076	0.160431	0.559509
chr1	+	284451954	284486016	13	Habp2	NM_001001505	2162	2326.86	2692.64	1961.08	0.728311	-0.457374	7.25326e-05	0.00243277
chr1	+	225355622	225356582	1	Mrgprd	NM_001001506	960	0	0	0	NA	NA	NA	NA
chr20	-	30813655	30834231	9	Oit3	NM_001001507	2287	147.168	134.229	160.106	1.19278	0.254331	0.413011	0.861684
chr2	+	238365251	238405889	7	Lppr4	NM_001001508	5551	0.253233	0.506466	0	0	#NAME?	0.699471	1
chr6	+	141932381	141938016	6	Slc25a47	NM_001001509	1550	7437.65	5458.53	9416.77	1.72515	0.786721	0.00106827	0.0201486
chr10	+	88149898	88166176	5	Klhl10	NM_001001510	2012	0.137961	0	0.275922	Inf	Inf	0.977637	1
chr17	-	23615670	23657985	3	Gcnt2	NM_001001511	4090	52.4175	59.9307	44.9044	0.749272	-0.416438	0.263373	0.715069
chr12	+	27420819	27497926	31	Gtf2i	NM_001001512	3964	961.019	930.683	991.355	1.06519	0.0911126	0.433127	0.877352
chr10	-	56036417	56045715	7	Tnfsf12	NM_001001513	1538	79.6356	83.8233	75.4478	0.900082	-0.151872	0.380822	0.834391
chr14	-	79676533	79799069	18	Ablim2	NM_001001514	2567	0	0	0	NA	NA	NA	NA
chr15	+	87780477	87996342	31	Lmo7	NM_001001515	5190	25.802	27.9261	23.678	0.847883	-0.238063	0.665232	1
chr8	+	116627092	116635734	26	Usp19	NM_001001516	4292	597.614	567.349	627.879	1.10669	0.14625	0.273209	0.728106
chr3	+	170399734	170411498	7	Rnf114	NM_001001517	2139	425.845	441.379	410.31	0.929611	-0.105301	0.537769	0.943624
chr2	+	169643630	169644582	1	Sucnr1	NM_001001518	952	0	0	0	NA	NA	NA	NA
chr3	+	2869515	2874910	7	Lcn6	NM_001001519	726	0	0	0	NA	NA	NA	NA
chr20	-	1328648	1330895	5	RT1-M2	NM_001001717	1035	22.5231	22.4951	22.551	1.00248	0.00357892	0.962101	1
chr10	-	56324100	56335657	8	Elp5	NM_001001718	1382	148.128	165.632	130.625	0.788644	-0.342553	0.0253985	0.18903
chr4	+	208787163	208847877	43	Fancd2	NM_001001719	4365	8.59699	7.63431	9.55967	1.2522	0.324463	0.505908	0.922812
chr9	+	9336154	9337409	2	Vmac	NM_001001720	516	31.6179	34.5125	28.7232	0.832254	-0.264904	0.437653	0.879983
chrX	+	105015269	105038197	2	Tmem35	NM_001001799	1945	0.758816	1.05511	0.46252	0.438361	-1.18981	0.843874	1
chr1	-	182622486	182645144	6	rnf141	NM_001001800	975	300.961	280.015	321.906	1.1496	0.201132	0.393441	0.8483
chr1	+	22621907	22742822	7	Akap7	NM_001001801	1044	15.1313	15.0792	15.1834	1.00691	0.00993471	1	1
chr20	-	7180181	7181118	3	Ly6g5b	NM_001001934	585	1.43437	0.969305	1.89943	1.95958	0.970544	0.604638	0.984941
chr20	+	7130630	7133328	3	Ly6g6c	NM_001001969	846	2.37751	3.83168	0.923334	0.240974	-2.05305	0.20346	0.625835
chr20	-	7134778	7137362	3	Ly6g6d	NM_001001970	405	1.59612	0.783916	2.40832	3.07216	1.61925	0.259199	0.709101
chr20	+	7140225	7141962	3	Ly6g6e	NM_001001972	959	0.329203	0.450329	0.208076	0.462053	-1.11387	1	1
chr2	-	207245238	207265869	13	Lmna	NM_001002016	3071	455.949	485.945	425.953	0.876545	-0.1901	0.195858	0.613679
chr10	+	30656515	30825798	10	Clint1	NM_001002022	1817	62.4716	56.3873	68.5558	1.2158	0.281907	0.164359	0.565843
chr4	-	29634748	29678914	10	Sgce	NM_001002023	1481	19.1991	22.1411	16.2571	0.734249	-0.445658	0.215122	0.647192
chr9	-	103911905	103960233	13	Slco4c1	NM_001002024	2175	0	0	0	NA	NA	NA	NA
chr14	-	87307371	87523225	19	Npc1l1	NM_001002025	4469	0.225165	0.450329	0	0	#NAME?	0.713423	1
chr4	+	142831813	142834962	4	Atp6v0e2	NM_001002253	862	184.604	165.869	203.34	1.22591	0.293855	0.0886117	0.405939
chr1	+	174418784	174419726	1	Olr79	NM_001002270	942	0	0	0	NA	NA	NA	NA
chr1	+	18958622	19080397	23	Ahi1	NM_001002277	3141	27.2647	25.7115	28.8179	1.12082	0.164551	0.627665	0.994674
chr3	-	155352443	155374642	7	Pofut1	NM_001002278	1188	99.8575	86.8127	112.902	1.30053	0.379096	0.0653166	0.341549
chr19	-	65999962	66009803	6	Rnf166	NM_001002279	1755	61.6028	56.7901	66.4155	1.16949	0.22588	0.438727	0.881169
chr1	-	104805800	104806685	1	Mrgprx2	NM_001002280	885	0	0	0	NA	NA	NA	NA
chr1	+	51682236	51683202	1	Mrgprh	NM_001002281	966	0	0	0	NA	NA	NA	NA
chr1	-	104682914	104683901	1	Mrgprb13	NM_001002283	2961	0	0	0	NA	NA	NA	NA
chr1	+	104604821	104605883	1	Mrgprb5	NM_001002284	1062	0	0	0	NA	NA	NA	NA
chr1	-	104872888	104873833	1	Mrgprx2l	NM_001002285	945	0	0	0	NA	NA	NA	NA
chr1	-	104442542	104443514	1	Mrgprc	NM_001002286	972	0	0	0	NA	NA	NA	NA
chr1	-	104488717	104489689	1	Mrgprb4	NM_001002287	972	0	0	0	NA	NA	NA	NA
chr1	-	223826746	223827676	1	Mrgpre	NM_001002288	930	0.0895669	0.179134	0	0	#NAME?	1	1
chr6	+	109782470	109922225	9	Fut8	NM_001002289	1728	54.9204	51.2635	58.5774	1.14267	0.192412	0.378472	0.831501
chr2	+	211735315	211739614	2	Kprp	NM_001002290	2815	0	0	0	NA	NA	NA	NA
chr10	-	34114411	34115353	1	Olr1384	NM_001002291	942	0	0	0	NA	NA	NA	NA
chr7	-	116583000	116606332	14	Top1mt	NM_001002798	1887	142.595	148.536	136.654	0.920004	-0.120287	0.55037	0.951259
chr11	+	41305983	41388211	9	Bace2	NM_001002802	1545	34.2735	37.6982	30.8489	0.818311	-0.289279	0.450342	0.889282
chr20	+	6236995	6251243	8	Btnl3	NM_001002803	2175	0	0	0	NA	NA	NA	NA
chr4	+	224126654	224141154	5	C1rl	NM_001002804	1384	584.755	560.463	609.047	1.08669	0.119934	0.538809	0.943999
chr20	-	6381700	6396108	41	C4b	NM_001002805	5353	27.73	34.8061	20.6539	0.593399	-0.752925	0.0468455	0.280904
chr9	+	16617251	16638762	22	Capn11	NM_001002806	2620	0	0	0	NA	NA	NA	NA
chr20	+	7113248	7122093	6	Clic1	NM_001002807	1187	79.4757	89.0529	69.8985	0.78491	-0.349402	0.095491	0.42264
chr4	+	57687447	57705979	11	Cpa5	NM_001002808	2073	0	0	0	NA	NA	NA	NA
chr20	+	6493787	6501639	17	Atf6b	NM_001002809	2507	449.284	430.304	468.264	1.08822	0.121967	0.474032	0.901925
chr17	+	6292660	6297340	8	Ctsql2	NM_001002813	1278	0	0	0	NA	NA	NA	NA
chr11	-	87020943	87036302	19	Ece2	NM_001002815	3010	0.606357	0.864734	0.347981	0.402414	-1.31325	0.598959	0.982266
chr18	-	57142772	57146245	4	Spink7	NM_001002816	261	0	0	0	NA	NA	NA	NA
chr20	+	6491245	6492716	2	Fkbpl	NM_001002818	1272	72.8106	74.7533	70.8679	0.948023	-0.0770054	0.80689	1
chr10	+	35051131	35097280	19	Gfpt2	NM_001002819	2992	8.51595	8.89967	8.13224	0.913768	-0.1301	0.87304	1
chr10	+	58734594	58737072	4	Ggt6	NM_001002820	1497	0	0	0	NA	NA	NA	NA
chr20	+	5217568	5221216	6	RT1-T18	NM_001002821	1097	0.138725	0.27745	0	0	#NAME?	1	1
chr20	-	5817709	5826708	15	Cchcr1	NM_001002822	2276	39.7059	46.2566	33.1553	0.716769	-0.480419	0.0548553	0.307524
chr4	-	219537466	219662981	29	Wnk1	NM_001002823	10497	9.99123	7.01381	12.9686	1.84902	0.886757	0.0963753	0.424704
chr4	+	221300458	221367890	33	Mug2	NM_001002826	3985	428.907	404.689	453.126	1.11969	0.163099	0.233682	0.673414
chr20	+	6409149	6433141	30	Notch4	NM_001002827	6483	40.5835	40.8424	40.3247	0.987325	-0.0184024	0.987415	1
chr20	+	6437160	6442086	9	Pbx2	NM_001002828	2858	198.625	219.437	177.813	0.810313	-0.303449	0.0501265	0.293554
chr12	-	12094022	12098070	6	Rasl11a	NM_001002829	810	5.20453	4.67331	5.73576	1.22734	0.29554	0.758298	1
chr14	-	36378159	36382381	4	Rasl11b	NM_001002830	1816	1.59993	1.60376	1.59611	0.995232	-0.00689473	1	1
chr20	+	4545592	4547523	5	Rpp21	NM_001002831	499	734.605	809.143	660.067	0.81576	-0.293784	0.0135232	0.124421
chr4	-	226300956	226302383	1	Senp17	NM_001002833	2855	0	0	0	NA	NA	NA	NA
chr4	+	230818137	230819565	1	Senp18	NM_001002834	1428	0	0	0	NA	NA	NA	NA
chr6	+	112880886	113037990	13	Smoc1	NM_001002835	1359	356.086	319.877	392.295	1.22639	0.29442	0.197399	0.616327
chr10	+	3772480	3772727	2	Prm1	NM_001002850	156	0	0	0	NA	NA	NA	NA
chr13	-	114555780	114562973	4	Nenf	NM_001002851	654	108.304	133.272	83.3368	0.625314	-0.677346	0.00109109	0.0203306
chr16	-	39736339	39745690	6	Spata4	NM_001002852	1086	0	0	0	NA	NA	NA	NA
chr2	-	168848654	168849665	1	P2ry13	NM_001002853	1011	20.501	22.9714	18.0306	0.784915	-0.349391	0.31006	0.769885
chr3	+	50829731	51028013	26	Tanc1	NM_001002854	5819	121.038	114.239	127.838	1.11904	0.162257	0.436179	0.879689
chr10	+	3778042	3778557	1	Prm3	NM_001002855	515	0	0	0	NA	NA	NA	NA
chr2	+	46895517	47171842	4	Enc1	NM_001003401	4521	182.152	145.377	218.926	1.50592	0.590649	0.0185648	0.153535
chr6	-	131991385	132118723	43	Eml5	NM_001003402	6540	114.374	79.387	149.361	1.88143	0.911832	7.74438e-08	6.72293e-06
chr4	+	233025358	233028241	1	Apold1	NM_001003403	2883	20.3093	22.3161	18.3024	0.820146	-0.286048	0.369476	0.823461
chr1	+	16641824	16655187	5	Il22ra2	NM_001003404	2505	0.377597	0.271196	0.483998	1.78468	0.835668	0.958166	1
chr5	-	81374660	81471769	8	LOC298116	NM_001003409	847	0	0	0	NA	NA	NA	NA
chr19	+	48535375	48537153	3	Pard6a	NM_001003653	1188	0	0	0	NA	NA	NA	NA
chr19	+	48534836	48537153	3	Pard6a	NM_001003654	1220	0.309235	0.179134	0.439336	2.45256	1.29429	0.956852	1
chr3	+	9195489	9203287	13	Pmpca	NM_001003673	1760	655.939	694.807	617.071	0.888118	-0.171177	0.161317	0.560892
chr20	-	7144633	7149502	5	Ly6g6f	NM_001003691	915	1.15356	1.05511	1.25202	1.18662	0.246859	1	1
chr19	+	9607755	9622130	11	Slc38a7	NM_001003705	1822	98.9128	110.9	86.9251	0.783812	-0.35142	0.0571959	0.314957
chr10	+	70671086	70676956	3	LOC360228	NM_001003706	368	443.558	385.422	501.695	1.30168	0.380373	0.000929491	0.0182322
chr4	+	223270167	223279220	6	Clec4d	NM_001003707	714	1.97754	2.6117	1.34337	0.514367	-0.959129	0.4586	0.894045
chr8	-	47342789	47345927	5	Trappc4	NM_001003708	863	79.6173	85.6009	73.6337	0.860198	-0.21726	0.255411	0.703647
chr13	-	94288628	94295607	6	Ufc1	NM_001003709	1037	396.963	427.525	366.401	0.857029	-0.222584	0.0792238	0.380438
chr1	-	79432844	79445344	3	C5ar2	NM_001003710	1255	64.1798	77.143	51.2166	0.663918	-0.590923	0.00234833	0.0354841
chr15	-	37655679	37662194	5	Jph4	NM_001003711	1891	16.6327	14.604	18.6615	1.27783	0.353696	0.79052	1
chr1	+	287744305	287758191	3	Kcnk18	NM_001003820	1218	0	0	0	NA	NA	NA	NA
chr6	+	102022154	102043712	6	Abhd12b	NM_001003928	621	0.117635	0.235271	0	0	#NAME?	1	1
chr5	-	62566648	62594369	9	Cntfr	NM_001003929	1332	15.8644	15.2352	16.4937	1.08261	0.11451	0.969664	1
chr7	+	12969071	12974416	5	Prss57	NM_001003956	705	0	0	0	NA	NA	NA	NA
chr6	+	38132682	38149613	18	Dnmt3a	NM_001003957	3491	0.233265	0.235271	0.23126	0.982952	-0.0248068	1	1
chr6	+	38044959	38149613	22	Dnmt3a	NM_001003958	4173	21.5623	19.3126	23.8121	1.23299	0.302156	0.42627	0.870499
chr3	+	155510827	155549356	24	Dnmt3b	NM_001003959	4289	42.4445	33.4264	51.4627	1.53959	0.622542	0.0136096	0.124836
chr20	-	13514653	13529169	13	Dnmt3l	NM_001003964	1689	0	0	0	NA	NA	NA	NA
chr20	+	5708949	5716869	3	Dpcr1	NM_001003965	1494	0	0	0	NA	NA	NA	NA
chr20	+	6434601	6436463	4	Gpsm3	NM_001003974	1228	28.8977	28.3265	29.4689	1.04033	0.0570443	0.757137	1
chr20	+	7191264	7193591	3	G4	NM_001003975	1994	83.6643	86.9536	80.375	0.924344	-0.113498	0.654267	1
chr20	-	7127584	7129404	5	G6b	NM_001003976	699	0.31124	0.414405	0.208076	0.502108	-0.99393	1	1
chr1	-	101014191	101030273	5	Klk1c6	NM_001003977	774	0	0	0	NA	NA	NA	NA
chr10	+	3179170	3213732	15	Gspt1	NM_001003978	5090	0	0	0	NA	NA	NA	NA
chr14	+	23301898	23365783	9	Tmprss11c	NM_001003979	1257	0	0	0	NA	NA	NA	NA
chr14	-	23940742	23960116	10	Tmprss11b	NM_001004020	1263	0	0	0	NA	NA	NA	NA
chr10	-	87824804	87828715	8	Krt13	NM_001004021	1317	0.135598	0.271196	0	0	#NAME?	1	1
chr10	-	87839480	87843297	8	Krt15	NM_001004022	1657	2.05481	4.10962	0	0	#NAME?	0.0475106	0.283486
chr10	-	69790103	69812413	6	Rffl	NM_001004068	1721	139.902	133.35	146.455	1.09828	0.135242	0.283946	0.741504
chr20	-	7091295	7093067	4	Sapcd1	NM_001004069	836	0.3428	0.6856	0	0	#NAME?	0.487039	0.908642
chr20	-	6457561	6459440	8	Egfl8	NM_001004070	1056	0	0	0	NA	NA	NA	NA
chr9	+	100167964	100204826	24	Ano7	NM_001004071	2742	0.478398	0.956796	0	0	#NAME?	0.324481	0.785879
chrX	+	37640724	37654356	11	Pdha1	NM_001004072	2814	51.8414	57.0896	46.5931	0.81614	-0.293112	0.248333	0.695197
chr20	+	7040456	7043830	5	Lsm2	NM_001004073	737	1.04023	0.790171	1.29029	1.63292	0.707454	0.743314	1
chr12	-	41057288	41078167	6	Rnf34	NM_001004075	1960	30.066	33.6557	26.4764	0.786685	-0.346143	0.200193	0.620178
chr14	-	6468115	6520631	16	Abcg3l1	NM_001004076	2018	5.82338	7.09016	4.5566	0.642665	-0.637861	0.382477	0.836523
chr14	+	13695243	13697096	1	Gk2	NM_001004077	1853	1.74889	2.06305	1.43473	0.695439	-0.524005	0.822552	1
chr2	-	104340313	104351466	11	Cct5	NM_001004078	1739	788.191	900.741	675.642	0.750096	-0.414854	0.00452557	0.056975
chr3	-	160837670	160864602	15	Bpi	NM_001004079	1945	0	0	0	NA	NA	NA	NA
chr3	+	19799928	19826452	17	Gsn	NM_001004080	2582	61.6358	87.5653	35.7063	0.407767	-1.29418	0.182881	0.592985
chr8	-	62101456	62109361	8	Mpi	NM_001004081	1397	105.581	97.0104	114.151	1.17669	0.234734	0.172567	0.578228
chr9	+	16706511	16711884	11	Hsp90ab1	NM_001004082	2338	329.372	352.6	306.144	0.868249	-0.203819	0.0879429	0.404506
chr1	-	85180393	85188174	6	Egln2	NM_001004083	1988	923.149	981.687	864.612	0.880741	-0.18321	0.162105	0.561857
chr20	+	6123271	6128913	6	RT1-Bb	NM_001004084	1515	348.88	345.567	352.193	1.01917	0.0274014	0.777383	1
chr3	-	14320762	14334358	14	Crat	NM_001004085	2730	890.02	342.095	1437.94	4.20335	2.07154	7.37517e-37	8.90518e-34
chr4	-	30218887	30245586	9	Pon3	NM_001004086	1452	3819.19	4207.77	3430.6	0.815302	-0.294593	0.0135321	0.124421
chr14	-	54787853	55216825	3	Pcdh7	NM_001004087	3755	9.22081	10.8418	7.59984	0.700978	-0.512559	0.222979	0.658641
chr19	+	48236118	48286469	14	Lrrc36	NM_001004088	2410	1.0715	0.96305	1.17996	1.22523	0.293054	1	1
chr1	-	227941860	227951122	15	Sipa1	NM_001004089	3123	165.949	168.175	163.723	0.973528	-0.0387056	0.800846	1
chr2	+	262587480	262753105	8	Tspan5	NM_001004090	2852	19.5766	18.6352	20.5179	1.10103	0.138854	0.625543	0.993991
chr4	+	208711256	208723906	15	Il17re	NM_001004091	2612	5.82922	9.21357	2.44488	0.265357	-1.914	0.0634043	0.335326
chr5	-	79238775	79271622	6	Txndc8	NM_001004092	431	0	0	0	NA	NA	NA	NA
chr6	+	102868508	102897656	11	Psma3l	NM_001004094	897	0	0	0	NA	NA	NA	NA
chr2	-	210999098	211000650	2	S100a11	NM_001004095	297	1.81811	2.29706	1.33916	0.582989	-0.77846	0.669708	1
chr2	+	219873826	219885388	5	Reg4	NM_001004096	474	16.3375	16.9542	15.7207	0.927245	-0.108977	0.773786	1
chr4	-	135447945	135451449	5	Try10	NM_001004097	741	0	0	0	NA	NA	NA	NA
chr14	+	23515342	23571975	19	Cenpc	NM_001004098	3132	47.845	49.502	46.1879	0.933052	-0.0999704	0.723885	1
chr15	-	41224497	41230461	2	Gjb2	NM_001004099	2420	761.871	737.379	786.362	1.06643	0.092787	0.59518	0.980423
chr1	+	100787664	100791042	5	Klk10	NM_001004100	840	0.350901	0.470542	0.23126	0.491476	-1.02481	1	1
chr1	+	100897612	100902010	5	Klk4	NM_001004101	771	0	0	0	NA	NA	NA	NA
chr4	+	45604813	45851998	15	ST7	NM_001004102	2098	220.848	233.874	207.821	0.8886	-0.170394	0.256452	0.704778
chr16	+	71284599	71335563	13	Tacc1	NM_001004107	7632	128.915	124.751	133.078	1.06675	0.0932177	0.897284	1
chr11	-	70484781	70489094	3	Stfa2l1	NM_001004129	312	0.721525	1.44305	0	0	#NAME?	0.231832	0.670657
chr10	-	87227066	87233672	7	Krt39	NM_001004130	1446	0	0	0	NA	NA	NA	NA
chr10	-	86986161	86991053	8	Krt24	NM_001004131	1476	0.135598	0.271196	0	0	#NAME?	1	1
chrX	-	2501707	2507492	16	Cdk16	NM_001004132	1749	0	0	0	NA	NA	NA	NA
chr1	+	224312758	224446275	10	Shank2	NM_001004133	4636	0	0	0	NA	NA	NA	NA
chr1	+	58420200	58438562	8	Tbp	NM_001004198	1868	72.6473	68.6035	76.6912	1.11789	0.160779	0.465822	0.897975
chr4	+	147442104	147497945	18	Tax1bp1	NM_001004199	2900	1359.05	1404.87	1313.24	0.934779	-0.0973027	0.369523	0.823461
chr10	-	45938610	45961971	12	Cops3	NM_001004200	1570	277.289	287.505	267.072	0.928929	-0.10636	0.421645	0.867487
chr10	-	84762158	84766655	8	Lrrc46	NM_001004201	1259	7.40392	9.49303	5.31481	0.559865	-0.836849	0.158347	0.556607
chr10	-	70431593	70436226	4	Ccl6	NM_001004202	348	499.479	460.957	538	1.16714	0.222974	0.278661	0.735285
chr12	-	21364249	21371507	14	Mcm7	NM_001004203	2332	93.9553	98.4584	89.4522	0.908528	-0.138397	0.644336	1
chr12	-	31870775	31895659	10	Tmem248	NM_001004204	1674	767.527	740.31	794.744	1.07353	0.102361	0.610188	0.985969
chr12	+	39415024	39426666	4	Rilpl2	NM_001004205	1289	72.3327	80.2119	64.4535	0.803541	-0.315557	0.15217	0.545807
chr7	-	2953210	2960679	13	Pa2g4	NM_001004206	1574	249.082	234.777	263.386	1.12186	0.165887	0.234042	0.673802
chr19	+	37160287	37164378	9	Dhps	NM_001004207	1305	96.5186	105.419	87.6177	0.831134	-0.266847	0.308567	0.768558
chr13	-	82855944	82866235	6	Cacybp	NM_001004208	1523	246.62	255.878	237.363	0.927644	-0.108357	0.453767	0.89111
chr14	+	7064339	7095462	7	Hsd17b11	NM_001004209	1595	3763.88	4073.18	3454.58	0.848128	-0.237646	0.0536009	0.305679
chr14	+	86423838	86428923	5	Xbp1	NM_001004210	1841	0	0	0	NA	NA	NA	NA
chr14	-	87340435	87348793	13	Ddx56	NM_001004211	1939	111.693	101.184	122.202	1.20772	0.272283	0.182805	0.592985
chr16	+	55949791	56097482	10	Tusc3	NM_001004212	1492	20.1994	21.771	18.6277	0.85562	-0.224958	0.473729	0.9017
chr16	-	61400975	61419223	6	Tmem66	NM_001004213	1837	1391.51	1507.94	1275.07	0.84557	-0.242003	0.0359567	0.237129
chr17	-	34023303	34051486	7	Nqo2	NM_001004214	1205	128.517	133.619	123.415	0.923629	-0.114615	0.424891	0.869101
chr18	-	47585433	47598040	5	Ppic	NM_001004215	1355	5.62617	6.73189	4.52045	0.671498	-0.574545	0.410581	0.860624
chr1	-	45881397	45946253	13	Nox3	NM_001004216	1707	0	0	0	NA	NA	NA	NA
chr1	+	3522926	3564344	11	Katna1	NM_001004217	1835	69.2901	69.7065	68.8736	0.988051	-0.0173423	0.930843	1
chr1	+	9287056	9301801	7	Fuca2	NM_001004218	1602	122.611	131.723	113.499	0.861652	-0.214822	0.177098	0.584813
chr1	-	99549580	99563745	6	Etfb	NM_001004220	841	1928.35	2243.74	1612.97	0.718876	-0.476185	4.28954e-05	0.00159144
chr1	-	101560505	101566824	7	Emc10	NM_001004221	1625	440.285	467.733	412.837	0.882634	-0.180112	0.143928	0.529544
chr1	-	177472245	177476928	8	Arfip2	NM_001004222	1775	191.82	180.73	202.911	1.12273	0.167011	0.302501	0.763845
chr1	+	232101010	232111617	10	Eef1g	NM_001004223	1397	64.6333	78.343	50.9236	0.650008	-0.62147	0.0886634	0.405939
chr1	+	152845254	152875715	8	Bcap31	NM_001004224	1205	1125.74	1247.93	1003.55	0.804171	-0.314427	0.0064248	0.0740749
chr20	+	13414046	13422144	7	RGD1303003	NM_001004225	1277	734.355	770.018	698.692	0.907371	-0.140236	0.223981	0.660149
chr2	+	207100470	207104061	6	RGD1303130	NM_001004226	1571	517.406	551.415	483.396	0.876646	-0.189934	0.0895153	0.407913
chr2	+	237659374	237680651	11	Rtcd1	NM_001004227	1354	143.268	155.102	131.434	0.847403	-0.23888	0.233178	0.672504
chr2	+	261184359	261264295	12	Emcn	NM_001004228	1392	22.9835	22.833	23.134	1.01318	0.0188954	0.860561	1
chr3	+	74426912	74452805	9	Nup35	NM_001004229	1511	62.7014	66.0219	59.3808	0.899411	-0.152948	0.501825	0.919186
chr3	-	157597579	157623398	11	Edem2	NM_001004230	1873	540.665	585.56	495.77	0.84666	-0.240146	0.0346568	0.231312
chr3	+	2606427	2612086	9	Npdc1	NM_001004231	1358	64.0987	77.5568	50.6406	0.652949	-0.614959	0.00681609	0.0773111
chr4	+	55467468	55476891	7	Fscn3	NM_001004232	1770	5.85592	4.24784	7.464	1.75713	0.813219	0.191888	0.607584
chr4	-	66994924	67013389	5	Mkrn1	NM_001004233	1442	119.404	121.95	116.858	0.958246	-0.0615318	0.722526	1
chr4	+	240779515	240795754	12	Pyroxd1	NM_001004234	1756	142.235	156.746	127.725	0.814853	-0.295388	0.0987897	0.430346
chr5	-	130507126	130517627	7	Mrpl37	NM_001004235	1453	149.841	164.456	135.225	0.822258	-0.282338	0.0468149	0.280847
chr5	-	138803949	138808976	8	Tspan1	NM_001004236	1233	0.949184	1.89837	0	0	#NAME?	0.405977	0.857146
chr5	+	176750388	176751785	4	Aurkaip1	NM_001004237	768	342.839	363.334	322.345	0.887186	-0.172691	0.195527	0.613511
chr7	-	58270886	58295672	7	Rab21	NM_001004238	1490	218.868	203.426	234.311	1.15183	0.203922	0.166837	0.569297
chr7	+	70730173	70745438	14	Dctn2	NM_001004239	1652	939.011	1007.94	870.077	0.86322	-0.2122	0.066456	0.344792
chr7	+	117381996	117385580	12	Gpaa1	NM_001004240	2018	336.478	344.7	328.255	0.95229	-0.070527	0.455672	0.891602
chr7	+	125047477	125071018	15	Samm50	NM_001004241	1611	583.189	656.244	510.133	0.777353	-0.363358	0.0446993	0.273537
chr7	-	125451429	125510336	12	Arhgap8	NM_001004242	1517	189.345	216.896	161.795	0.745957	-0.422836	0.013304	0.123074
chr7	-	139359663	139386634	15	Rpap3	NM_001004243	2035	139.134	152.728	125.539	0.821978	-0.282827	0.142246	0.525831
chrX	-	114700519	114716824	9	Kansl2	NM_001004244	2058	16.1554	16.1323	16.1785	1.00286	0.00412228	0.919802	1
chr8	+	39998698	40009626	7	Esam	NM_001004245	1807	96.8108	103.242	90.3801	0.875423	-0.191947	0.282154	0.738923
chr8	-	52390855	52436391	21	Ttc12	NM_001004246	2214	3.71043	5.61886	1.80201	0.320707	-1.64067	0.0789915	0.379938
chr8	+	62472011	62489306	11	Ubl7	NM_001004247	1362	306.033	305.899	306.166	1.00087	0.00126109	0.90035	1
chr8	-	86767826	86789807	6	Tmem30a	NM_001004248	1754	1365.95	1296.37	1435.53	1.10735	0.147115	0.230277	0.66958
chr8	-	96576974	96584888	3	Tmed3	NM_001004249	1307	303.679	310.593	296.766	0.955481	-0.0657006	0.487473	0.908642
chr8	+	117030931	117042820	13	Uqcrc1	NM_001004250	1567	1803.22	1914.35	1692.09	0.883899	-0.178047	0.189949	0.603878
chr9	+	63901496	63909427	5	MGC94335	NM_001004251	1379	187.614	196.475	178.753	0.909798	-0.136381	0.44286	0.884864
chr9	-	84083340	84142523	17	Farsb	NM_001004252	2161	162.559	153.538	171.58	1.11751	0.160291	0.488434	0.909489
chrX	+	33875313	33909008	9	Syap1	NM_001004253	1466	224.986	238.156	211.817	0.889405	-0.169088	0.353193	0.810629
chr14	+	113612462	113631953	15	Mtif2	NM_001004254	2179	93.279	99.7933	86.7648	0.869445	-0.201833	0.2344	0.674166
chr17	-	19948511	19970468	11	Dek	NM_001004255	2553	334.213	361.593	306.832	0.848558	-0.236916	0.0921916	0.41494
chr17	+	25936390	25963433	9	Sirt5	NM_001004256	1342	220.077	229.059	211.094	0.921568	-0.117837	0.422542	0.868224
chr17	+	80379449	80400361	14	Hspa14	NM_001004257	1737	104.037	100.239	107.835	1.07578	0.105382	0.711744	1
chr1	-	92948062	92959663	4	Nudt19	NM_001004258	1315	86.4435	79.8546	93.0324	1.16502	0.220358	0.299734	0.760327
chr1	+	101918527	101923539	16	Pnkp	NM_001004259	1666	112.773	110.591	114.955	1.03946	0.0558341	0.709978	1
chr1	+	223537695	223560895	11	Slc22a18	NM_001004260	1468	2077.67	2244.71	1910.63	0.851173	-0.232476	0.0342037	0.229789
chr1	-	269413548	269438930	16	Pyroxd2	NM_001004261	1970	350.64	326.037	375.242	1.15092	0.202784	0.336024	0.797974
chr2	-	161883497	161920986	19	Cog6	NM_001004262	2152	129.275	122.931	135.619	1.10321	0.141713	0.659849	1
chr3	-	51762612	51835353	16	Itgb6	NM_001004263	2799	1.18382	1.44431	0.923334	0.639289	-0.645461	0.773812	1
chr3	+	117157779	117177433	9	Knstrn	NM_001004264	1454	5.48277	7.13012	3.83542	0.537919	-0.89454	0.356862	0.814269
chr3	+	117599949	117612635	10	Spint1	NM_001004265	2290	5.93756	8.39019	3.48493	0.415359	-1.26757	0.136542	0.514037
chr3	+	12630118	12742336	13	Ak8	NM_001004266	1551	0.228292	0.456584	0	0	#NAME?	0.71176	1
chr4	+	39352536	39369349	9	Tmem106b	NM_001004267	1854	540.878	634.479	447.277	0.70495	-0.504406	0.000770569	0.0157215
chr5	+	156105381	156116411	4	RGD1303271	NM_001004268	3384	0	0	0	NA	NA	NA	NA
chr8	-	28166274	28227631	9	Jam3	NM_001004269	1882	170.959	186.405	155.514	0.834282	-0.261393	0.1298	0.501921
chr8	+	60185055	60217874	9	Snupn	NM_001004270	1338	13.781	17.2091	10.3529	0.601594	-0.733137	0.0828319	0.39166
chr14	+	22455324	22493180	6	Ugt2b15	NM_001004271	1869	3535.72	4497.31	2574.12	0.57237	-0.804981	1.14603e-12	2.57992e-10
chr10	+	56350258	56354353	5	Phf23	NM_001004272	1686	129.637	133.123	126.151	0.947625	-0.0776115	0.762601	1
chr10	-	72063587	72095167	12	Ggnbp2	NM_001004273	2768	716.403	805.806	627	0.778103	-0.361967	0.00527771	0.0635526
chr10	+	86747475	86759484	4	Igfbp4	NM_001004274	2163	14639.9	15497.2	13782.6	0.889361	-0.169159	0.179382	0.586834
chr14	-	10666121	10696464	10	Cops4	NM_001004275	1573	325.7	332.991	318.409	0.956209	-0.0646016	0.567887	0.960362
chr18	+	40666686	40798792	7	Commd10	NM_001004276	1395	279.025	295.287	262.763	0.889856	-0.168356	0.204891	0.628544
chr19	+	48996418	49013716	6	Pla2g15	NM_001004277	2647	519.609	648.904	390.315	0.601499	-0.733365	0.000601183	0.0130925
chr1	-	227701922	227715984	8	Tsga10ip	NM_001004278	1802	0	0	0	NA	NA	NA	NA
chr2	+	197690282	197702296	10	Ppid	NM_001004279	1331	8.98881	10.6963	7.28129	0.680727	-0.554851	0.30882	0.768558
chr3	-	40897288	40915185	8	Mmadhc	NM_001004280	1308	536.298	533.243	539.352	1.01146	0.016433	0.83113	1
chr3	+	154120295	154137199	8	Tbc1d20	NM_001004281	1364	158.814	143.398	174.229	1.215	0.280954	0.0949897	0.42137
chr6	+	3625204	3683555	4	Tmem178a	NM_001004282	1640	16.9118	17.7191	16.1045	0.908878	-0.137841	0.837656	1
chr7	-	119182950	119195340	15	Eif3d	NM_001004283	1845	491.981	480.862	503.1	1.04625	0.0652223	0.690763	1
chr8	+	115658772	115663131	12	Zmynd10	NM_001004284	1730	40.9076	40.1035	41.7116	1.0401	0.0567201	0.798513	1
chr1	+	208172318	208360445	22	Tacc2	NM_001004415	9192	2.1208	1.35099	2.89061	2.13963	1.09736	0.425589	0.869909
chr1	+	208172318	208360445	21	Tacc2	NM_001004418	4077	0	0	0	NA	NA	NA	NA
chr14	-	83025668	83039430	15	Tacc3	NM_001004424	2040	46.1952	45.1857	47.2047	1.04468	0.0630651	0.778657	1
chr6	+	52289503	52306889	13	Pdia6	NM_001004442	1721	2651.16	2883.97	2418.34	0.838547	-0.254037	0.0149685	0.133341
chr8	+	64087246	64112576	14	Hexa	NM_001004443	1779	1462.35	1578.06	1346.64	0.853351	-0.228789	0.0398747	0.254991
chr6	+	108825980	108936519	5	Zbtb1	NM_001004444	3267	110.693	103.64	117.746	1.13611	0.1841	0.264948	0.716564
chr6	-	117412861	117414143	1	Rnf113a2	NM_001004445	1282	103.762	105.71	101.813	0.963135	-0.05419	0.988162	1
chr1	+	251867336	252035194	34	Smarca2	NM_001004446	5928	355.812	336.997	374.627	1.11166	0.152717	0.322371	0.783914
chr5	+	163325256	163350448	15	Spata21	NM_001004447	2431	0.82869	1.4493	0.208076	0.14357	-2.80018	0.333152	0.79585
chr2	+	203645266	203648519	1	Dear	NM_001004448	3253	0	0	0	NA	NA	NA	NA
chr7	+	132724655	132759434	17	Smgc	NM_001004449	2779	0	0	0	NA	NA	NA	NA
chrX	+	53540768	53697914	16	Dmd	NM_001005244	2297	0	0	0	NA	NA	NA	NA
chrX	+	53540768	53697914	14	Dmd	NM_001005246	2038	0	0	0	NA	NA	NA	NA
chr13	-	118372893	118420106	12	Cr1l	NM_001005265	1908	0	0	0	NA	NA	NA	NA
chr13	-	118372893	118420106	13	Cr1l	NM_001005330	2094	0	0	0	NA	NA	NA	NA
chr19	+	54077937	54100118	12	Ddx19a	NM_001005381	2528	122.548	116.13	128.966	1.11053	0.151252	0.310759	0.770774
chr1	-	100371039	100375077	5	Klk1c12	NM_001005382	780	0	0	0	NA	NA	NA	NA
chr8	-	114498892	114503576	14	Acy1	NM_001005383	1326	513.269	538.575	487.964	0.906028	-0.142373	0.168378	0.572021
chr2	-	75851663	75892056	17	Osmr	NM_001005384	2888	10.2274	11.0442	9.4106	0.852083	-0.230933	0.804694	1
chr8	+	47346316	47348693	5	Rps25	NM_001005528	466	15.5603	16.4536	14.667	0.891413	-0.165834	0.712505	1
chr10	-	29182722	29208093	8	Ttc1	NM_001005529	1435	201.788	201.602	201.974	1.00185	0.00266009	0.971449	1
chr10	-	56571906	56575557	4	Slc16a13	NM_001005530	1904	63.5948	64.8761	62.3135	0.9605	-0.0581424	0.912475	1
chr10	-	91062287	91073123	5	Spata32	NM_001005531	1148	0.0895669	0.179134	0	0	#NAME?	1	1
chr10	+	101879211	101890139	6	MGC95210	NM_001005532	3252	36.0281	40.3582	31.6981	0.785419	-0.348465	0.154457	0.549264
chr12	-	613301	634435	6	N4bp2l2	NM_001005533	1984	251.746	255.837	247.655	0.968016	-0.0468976	0.640797	1
chr13	-	94125547	94146440	6	Sdhc	NM_001005534	1149	1029.46	1109.55	949.369	0.855636	-0.224931	0.0481068	0.285247
chr13	+	58350166	58375119	7	Ddx59	NM_001005535	2058	0	0	0	NA	NA	NA	NA
chr18	+	46669389	46690474	8	Srfbp1	NM_001005536	1499	51.5434	52.7304	50.3564	0.954978	-0.0664613	0.946355	1
chr18	+	29291707	29306512	20	Ik	NM_001005537	1995	360.332	351.631	369.034	1.04949	0.0696918	0.627276	0.994674
chr1	-	177223330	177245718	12	Fam160a2	NM_001005538	3444	93.0174	90.7288	95.3059	1.05045	0.0710044	0.859699	1
chr20	+	42510560	42532381	8	Smpdl3a	NM_001005539	1661	1632.52	1810.74	1454.3	0.80315	-0.316259	0.0198113	0.159651
chr2	+	226682750	226687765	10	Ppm1j	NM_001005540	1686	0.615117	0.998975	0.23126	0.231497	-2.11093	0.597062	0.980833
chr3	+	129448273	129469258	24	Vps16	NM_001005541	2618	271.263	287.987	254.539	0.883858	-0.178113	0.218548	0.652012
chr5	-	139243234	139268227	16	Nasp	NM_001005543	2603	53.5109	56.106	50.9158	0.907493	-0.140042	0.673263	1
chr5	+	175945053	176002864	14	Morn1	NM_001005544	1607	6.27795	3.79878	8.75712	2.30525	1.20492	0.0541743	0.306972
chr7	+	141725703	141732907	7	Myg1	NM_001005545	1163	121.483	125.449	117.517	0.936769	-0.0942353	0.548641	0.950471
chr8	-	47724881	47728489	3	Ttc36	NM_001005546	780	739.077	840.574	637.58	0.758505	-0.398769	0.00326126	0.0449872
chr8	-	59377468	59400900	7	Tspan3	NM_001005547	1615	68.563	69.4154	67.7105	0.975439	-0.0358768	0.794866	1
chr8	+	81983992	82008381	12	Leo1	NM_001005548	2138	190.868	192.394	189.342	0.984137	-0.0230694	0.926481	1
chr8	-	83701247	83892349	11	Tinag	NM_001005549	1652	0.135598	0.271196	0	0	#NAME?	1	1
chr9	-	69728933	69762079	19	Ndufs1	NM_001005550	2476	1120.1	1126.66	1113.53	0.988349	-0.0169072	0.709321	1
chrX	+	32609748	32652920	7	Car5b	NM_001005551	1765	15.5582	16.2321	14.8843	0.916966	-0.12506	0.722083	1
chr11	-	1794869	1799518	3	MGC95208	NM_001005552	1322	1.22774	1.5768	0.878672	0.55725	-0.843604	0.769881	1
chr12	+	49383688	49424284	20	Git2	NM_001005553	2985	254.34	227.579	281.101	1.23518	0.304721	0.0260027	0.192299
chr15	+	111913764	111967206	17	Tm9sf2	NM_001005554	2773	1967.46	1914.32	2020.59	1.05551	0.0779395	0.526792	0.937179
chr2	-	241308144	241367644	14	Ptbp2	NM_001005555	1817	37.5173	40.637	34.3975	0.846456	-0.240492	0.426881	0.870809
chr3	+	130273621	130287788	7	Mavs	NM_001005556	2942	299.075	266.493	331.657	1.24452	0.315595	0.0406738	0.258049
chr4	-	232187480	232209492	4	Akap3	NM_001005557	2860	1.36939	0.747992	1.99079	2.66151	1.41224	0.349581	0.807689
chr5	+	130179451	130192201	8	Fam151a	NM_001005558	1884	0	0	0	NA	NA	NA	NA
chr9	-	112886287	112890798	2	Txndc2	NM_001005559	1607	0	0	0	NA	NA	NA	NA
chr7	-	120512620	120552754	17	Pla2g6	NM_001005560	3077	1.01264	0.913168	1.11211	1.21786	0.284352	1	1
chr1	+	101820325	101847650	15	Vrk3	NM_001005561	1728	306.844	318.348	295.339	0.927723	-0.108233	0.353942	0.811833
chr3	-	87591102	87632647	12	Creb3l1	NM_001005562	2642	110.919	107.698	114.14	1.05981	0.0838095	0.814448	1
chr7	-	117589686	117592585	9	Fbxl6	NM_001005563	1702	136.654	150.577	122.732	0.815082	-0.294983	0.128032	0.497622
chr9	-	100501660	100541256	6	Thap4	NM_001005564	1929	78.1132	80.9779	75.2485	0.929247	-0.105866	0.522111	0.93453
chrX	-	154351132	154467649	22	Arhgef6	NM_001005565	2247	16.3828	12.05	20.7156	1.71913	0.781681	0.0477781	0.284314
chr15	-	50459290	50481325	10	Mtmr9	NM_001005761	2217	53.1949	46.4901	59.8997	1.28844	0.365626	0.113996	0.466593
chr15	-	55585614	55616959	22	Sorbs3	NM_001005762	2598	341.348	305.157	377.538	1.2372	0.307074	0.0832006	0.392426
chr2	-	227614902	227691823	8	Rap1a	NM_001005765	2433	152.347	146.309	158.386	1.08254	0.114419	0.614285	0.988123
chr13	+	55157901	55204205	20	Atp2b4	NM_001005871	3997	4.77698	3.96574	5.58823	1.40913	0.494801	0.5266	0.937179
chr1	-	227898844	227906149	14	Kat5	NM_001005872	1948	86.7181	87.8056	85.6307	0.97523	-0.036185	0.982594	1
chr10	+	75981099	76019044	18	Dhx40	NM_001005873	2798	154.566	156.079	153.054	0.980622	-0.0282306	0.915352	1
chr10	-	78940770	78942989	1	Kif2b	NM_001005874	2219	0	0	0	NA	NA	NA	NA
chr10	+	95441588	95460233	11	Psmd12	NM_001005875	1485	239.451	230.747	248.155	1.07544	0.104929	0.418223	0.865997
chr10	+	104204895	104222933	5	Hn1	NM_001005876	1341	41.1229	48.3659	33.8799	0.700491	-0.513561	0.0571527	0.31491
chr1	-	90424463	90425456	1	Ffar2	NM_001005877	993	0.398802	0.358268	0.439336	1.22628	0.294286	1	1
chr20	+	7567670	7585191	11	Kifc1	NM_001005878	2293	10.5155	9.78046	11.2505	1.15031	0.202021	0.563355	0.957372
chr4	+	183421402	183467042	19	Gfpt1	NM_001005879	2260	116.183	106.843	125.522	1.17482	0.232444	0.364757	0.819265
chr4	-	222810974	222885994	6	Clec4a2	NM_001005880	790	2.72571	2.72253	2.7289	1.00234	0.00337464	1	1
chr8	+	23001935	23014338	10	Lppr2	NM_001005881	2870	14.7178	15.6722	13.7634	0.878205	-0.18737	0.534655	0.941815
chr14	+	43597573	43625115	5	Rbm47	NM_001005882	2346	401.92	355.318	448.523	1.26231	0.336068	0.0406481	0.258049
chr14	-	60685761	60712615	10	Pi4k2b	NM_001005883	1691	251.365	260.497	242.232	0.929883	-0.104879	0.494587	0.91475
chr14	+	82917691	82956473	14	Letm1	NM_001005884	2565	420.396	387.118	453.675	1.17193	0.228887	0.126567	0.494335
chr1	-	171716969	171731341	8	Dnajb13	NM_001005885	2255	0.579302	0.235271	0.923334	3.92456	1.97253	0.513124	0.927379
chr1	-	233241962	233298558	20	Dagla	NM_001005886	5567	10.9388	9.77193	12.1057	1.23883	0.308973	0.51682	0.930429
chr3	+	157055847	157117955	23	Itch	NM_001005887	2564	402.329	389.242	415.416	1.06724	0.0938884	0.510685	0.925111
chr6	-	131393898	131454514	17	Galc	NM_001005888	2054	27.7137	24.8766	30.5507	1.22809	0.296419	0.380553	0.834214
chr8	+	55152376	55194097	13	Rdx	NM_001005889	4105	2310.23	2556.31	2064.15	0.807472	-0.308516	0.0138167	0.12604
chr4	-	222969395	222981511	6	Clec4a1	NM_001005890	1200	40.2747	45.1562	35.3931	0.783794	-0.351454	0.120189	0.480106
chr4	-	222933505	222943219	6	Clec4a3	NM_001005891	779	31.364	33.9979	28.7301	0.845054	-0.242885	0.328517	0.791361
chr3	+	86627763	86646459	5	Spi1	NM_001005892	1341	75.6909	72.6498	78.732	1.08372	0.115991	0.585576	0.974171
chr4	+	142898414	142900127	1	Repin1	NM_001005893	1713	306.184	278.001	334.368	1.20276	0.266351	0.0467133	0.280745
chr19	+	54045140	54072633	8	Ddx19b	NM_001005895	5469	245.746	247.474	244.017	0.986031	-0.0202944	1	1
chr4	+	223124393	223147898	6	Clec4b2	NM_001005896	712	0.50883	0.741737	0.275922	0.371995	-1.42665	0.790845	1
chr4	-	223287985	223293143	6	Clec4e	NM_001005897	725	1.05234	1.5975	0.507182	0.317484	-1.65524	0.514302	0.928042
chr10	+	64800317	64803052	2	Omg	NM_001005898	1838	0.117635	0.235271	0	0	#NAME?	1	1
chr4	+	223068558	223086037	6	Clec4a	NM_001005899	831	5.68061	6.07242	5.2888	0.870953	-0.199333	0.76904	1
chr1	-	90035100	90037134	4	Hcst	NM_001005900	424	5.15247	4.02009	6.28484	1.56336	0.644648	0.355705	0.813931
chr5	-	176558656	176574530	20	Mib2	NM_001005901	3799	176.822	183.2	170.445	0.930377	-0.104113	0.607181	0.985191
chr4	-	186019188	186025416	12	Abtb1	NM_001005902	1887	329.268	350.573	307.964	0.878459	-0.186953	0.208396	0.635384
chr5	+	161383343	161482718	9	Capzb	NM_001005903	1626	664.602	708.767	620.437	0.875375	-0.192027	0.0906671	0.410696
chr5	+	63974870	63976758	1	Ccin	NM_001005904	1888	0	0	0	NA	NA	NA	NA
chr7	-	60110074	60122818	16	Cct2	NM_001005905	1904	426.082	433.517	418.646	0.965697	-0.0503574	0.697135	1
chr9	-	82438464	82443159	4	Chpf	NM_001005906	2917	74.0022	96.3046	51.6999	0.536837	-0.897443	0.000627913	0.0134083
chr1	+	227783723	227790741	10	Efemp2	NM_001005907	1450	0	0	0	NA	NA	NA	NA
chr16	-	14274049	14285133	9	Ghitm	NM_001005908	1372	1235.02	1304.2	1165.85	0.893915	-0.16179	0.212096	0.640824
chr1	-	175735385	175736285	1	Olr156	NM_001006595	1800	0	0	0	NA	NA	NA	NA
chr3	+	82714025	82714931	1	Olr595	NM_001006596	906	0	0	0	NA	NA	NA	NA
chr7	-	4056514	4057450	2	Olr990	NM_001006597	888	0	0	0	NA	NA	NA	NA
chr10	-	12194532	12195474	1	Olr1362	NM_001006598	942	0	0	0	NA	NA	NA	NA
chr20	+	3831521	3832412	1	Olr1738	NM_001006599	891	0	0	0	NA	NA	NA	NA
chr10	-	66032982	66047520	12	Pigs	NM_001006602	2409	215.745	200.059	231.432	1.15682	0.210164	0.131825	0.505592
chr10	+	88790982	88795172	10	Coasy	NM_001006954	2029	591.106	620.044	562.167	0.906657	-0.141372	0.280855	0.737847
chr11	-	47176048	47182290	5	Cldnd1	NM_001006955	2035	253.707	245.1	262.314	1.07023	0.0979187	0.53844	0.943727
chr12	+	9305264	9358429	11	Katnal1	NM_001006956	3269	0	0	0	NA	NA	NA	NA
chr12	+	27093545	27110202	7	Eif4h	NM_001006957	2420	1200.52	1267.33	1133.71	0.89457	-0.160734	0.143151	0.52788
chr14	+	17163927	17190705	21	Sdad1	NM_001006958	2243	33.2857	27.4935	39.0779	1.42135	0.507263	0.13456	0.510632
chr14	+	32901624	32918108	6	Noa1	NM_001006959	2231	50.9095	46.299	55.5201	1.19916	0.262028	0.3931	0.847865
chr14	-	85011887	85015728	4	Mtfp1	NM_001006960	1354	177.444	194.297	160.591	0.826528	-0.274865	0.0972857	0.426808
chr14	+	85147854	85150705	3	Osm	NM_001006961	720	1.12328	1.22799	1.01858	0.829466	-0.269746	1	1
chr15	-	38250949	38254058	9	Tinf2	NM_001006962	1656	122.904	107.433	138.375	1.28801	0.365148	0.0348602	0.231995
chr15	-	58977915	59000926	6	Itm2b	NM_001006963	1758	6711.55	6822.36	6600.74	0.967515	-0.0476434	0.578949	0.970297
chr16	+	19652970	19659002	9	Babam1	NM_001006964	1321	230.739	245.691	215.788	0.87829	-0.187231	0.282569	0.739224
chr16	+	19735399	19736135	2	Mrpl34	NM_001006965	572	132.415	152.75	112.08	0.733749	-0.446641	0.0172247	0.145997
chr17	+	32456607	32473005	10	Eci2	NM_001006966	1575	1304.28	1070.55	1538	1.43664	0.522694	3.24084e-06	0.00016749
chr19	-	55018814	55037768	15	Kars	NM_001006967	2143	521.609	547.147	496.07	0.906648	-0.141385	0.174699	0.581688
chr1	-	63016180	63023232	5	Tsen34	NM_001006968	2688	0	0	0	NA	NA	NA	NA
chr1	+	102057007	102061802	8	Irf3	NM_001006969	1445	796.028	817.965	774.092	0.946364	-0.0795333	0.583959	0.973411
chr1	+	197480624	197511188	14	Uqcrc2	NM_001006970	1830	1990.65	2011.45	1969.84	0.979312	-0.0301592	0.724037	1
chr1	-	204965143	204976424	16	Cln3	NM_001006971	1675	126.7	142.629	110.77	0.776627	-0.364707	0.0340941	0.229493
chr1	-	226124943	226129979	10	Ndufv1	NM_001006972	1481	1118.05	1169.69	1066.41	0.911704	-0.133363	0.297158	0.757699
chr1	+	227174537	227177363	6	mrpl11	NM_001006973	775	193.25	205.34	181.159	0.882241	-0.180755	0.216179	0.648593
chr1	-	234062122	234067704	4	Ccdc86	NM_001006974	1026	64.1886	55.6239	72.7532	1.30795	0.387306	0.13395	0.508991
chr1	+	234307344	234319170	7	Ms4a6bl	NM_001006975	2706	0	0	0	NA	NA	NA	NA
chr2	+	83279779	83298535	18	Tars	NM_001006976	2431	1043.67	941.113	1146.22	1.21794	0.284446	0.0162015	0.140554
chr2	+	143404696	143438535	12	Adad1	NM_001006977	1912	0.492869	0.777662	0.208076	0.267566	-1.90203	0.793582	1
chr4	-	208982585	208995976	9	Sec13	NM_001006978	1273	63.4282	63.6517	63.2048	0.992979	-0.0101652	0.90657	1
chr5	+	152779324	152788646	8	Matn1	NM_001006979	1889	0	0	0	NA	NA	NA	NA
chr6	-	59555820	59595751	8	Bcap29	NM_001006980	1733	147.399	141.201	153.597	1.08779	0.121396	0.421776	0.867487
chr6	-	116597172	116620312	15	Dlst	NM_001006981	2779	1348.58	1311.58	1385.57	1.05641	0.0791719	0.788724	1
chrX	+	2090632	2102536	6	Uxt	NM_001006982	528	157.637	175.671	139.603	0.794683	-0.331548	0.0345232	0.230769
chr7	+	12160067	12166499	5	Abhd17a	NM_001006983	1447	516.744	548.685	484.804	0.883575	-0.178575	0.235486	0.675534
chr7	-	34946141	35009764	12	Vezt	NM_001006984	2883	59.9565	65.5598	54.3533	0.829064	-0.270445	0.197648	0.616526
chr7	-	95910452	95932009	7	Mrpl13	NM_001006985	766	112.787	122.101	103.473	0.847434	-0.238827	0.134997	0.511272
chr8	-	23140381	23153799	8	Ecsit	NM_001006986	1453	332.488	348.885	316.092	0.906006	-0.142408	0.192328	0.608044
chr8	+	70682805	70710181	8	Spg21	NM_001006987	1503	508.597	584.72	432.475	0.739627	-0.43513	0.0111894	0.109117
chr8	-	116702847	116709264	6	Wdr6	NM_001006988	4164	255.279	239.317	271.241	1.1334	0.180652	0.514078	0.928042
chr8	+	117145033	117147665	4	Shisa5	NM_001006989	1455	237.354	239.086	235.623	0.985513	-0.0210525	0.889772	1
chr11	+	40265271	40305321	9	Igsf5	NM_001006990	2138	467.828	435.195	500.461	1.14997	0.201597	0.124265	0.489324
chr14	-	7027804	7045536	8	Nudt9	NM_001006991	1394	255.241	259.635	250.846	0.966148	-0.0496846	0.795022	1
chr15	+	31859204	31859642	1	Ang1	NM_001006992	438	322.152	392.687	251.617	0.640756	-0.642152	5.41261e-05	0.00190186
chr15	-	45357058	45401752	8	Sgcg	NM_001006993	1499	0	0	0	NA	NA	NA	NA
chr15	+	106783001	106806561	9	Gpr180	NM_001006994	1808	200.954	183.402	218.507	1.19141	0.252666	0.0719316	0.361033
chr1	-	51757960	51776935	11	Acat2	NM_001006995	1999	21.0699	24.5991	17.5407	0.713062	-0.487901	0.18863	0.602112
chr13	-	42680393	42693902	13	Ddx18	NM_001006996	2151	34.8495	36.708	32.991	0.898741	-0.154023	0.581524	0.972453
chr1	+	177389587	177393431	6	Smpd1	NM_001006997	2310	2244.41	2231.08	2257.74	1.01195	0.0171398	0.970208	1
chr1	-	226018061	226038888	10	Aldh3b1	NM_001006998	1863	6.99134	6.75929	7.2234	1.06866	0.0958064	0.913291	1
chr2	-	18553025	18803145	8	Xrcc4	NM_001006999	1439	33.5095	37.8815	29.1375	0.769175	-0.378616	0.248935	0.696076
chr4	+	178596100	178598690	10	Pcgf1	NM_001007000	828	29.2848	33.4488	25.1208	0.751022	-0.413073	0.212708	0.642234
chr5	+	117537608	117629816	20	Ift74	NM_001007001	2109	32.5117	32.4461	32.5772	1.00404	0.00582067	0.947006	1
chr5	+	176764183	176768534	8	Mxra8	NM_001007002	2268	43.6648	50.9294	36.4002	0.71472	-0.48455	0.0842288	0.394431
chr8	-	121945845	122008281	18	Cnot10	NM_001007003	2552	150.319	147.364	153.273	1.0401	0.0567179	0.755572	1
chr9	-	82184864	82188549	4	Tuba4a	NM_001007004	1449	361.338	397.923	324.752	0.816119	-0.293149	0.0934448	0.416768
chr10	-	109347155	109350645	6	Arhgdia	NM_001007005	1823	1310.37	1436.87	1183.87	0.82392	-0.279423	0.0160379	0.139865
chr15	+	2515817	2523491	4	Dusp13	NM_001007006	2546	0	0	0	NA	NA	NA	NA
chr15	+	49197429	49240307	11	Rnaseh2b	NM_001007007	1422	27.2375	30.2784	24.1967	0.79914	-0.32348	0.328599	0.791361
chr20	-	15820608	15822408	4	Chchd10	NM_001007008	619	2323.08	2403.16	2243	0.933356	-0.0995008	0.2946	0.75482
chr6	-	37237527	37272329	17	Drc1	NM_001007009	2455	0.208076	0	0.416152	Inf	Inf	0.661449	1
chr8	-	73438095	73451286	9	Dyx1c1	NM_001007010	1996	0.47076	0.593538	0.347981	0.586282	-0.770334	0.797575	1
chr10	+	86310807	86319305	8	Zpbp2	NM_001007011	1437	19.3968	21.7508	17.0428	0.783548	-0.351906	0.345533	0.805259
chr2	+	229848441	229853533	3	Alx3	NM_001007012	1540	0	0	0	NA	NA	NA	NA
chr6	-	107798629	107801179	2	Gphb5	NM_001007013	390	0	0	0	NA	NA	NA	NA
chr1	+	226874270	226884604	4	Rbm4b	NM_001007014	1801	56.1103	55.5451	56.6754	1.02035	0.029064	0.798786	1
chr15	-	31984002	31984812	2	Rnase2	NM_001007015	650	0.137961	0	0.275922	Inf	Inf	0.977637	1
chr4	+	142744001	142797357	103	Sspo	NM_001007016	15560	5.41907	5.24537	5.59277	1.06623	0.0925178	0.83317	1
chr8	-	90151446	90187798	5	Hmgn3	NM_001007020	1407	1.68931	2.36426	1.01436	0.429041	-1.22081	0.518547	0.932107
chrX	-	11936458	11963424	9	Atp6ap2	NM_001007091	1170	300.369	294.427	306.312	1.04036	0.0570895	0.613621	0.988123
chr5	+	170179525	170247835	17	Clstn1	NM_001007092	4328	229.926	203.042	256.81	1.26481	0.338922	0.0169613	0.144778
chr2	-	209029701	209034693	9	Creb3l4	NM_001007093	1104	0	0	0	NA	NA	NA	NA
chr5	-	108985562	108999161	8	Plin2	NM_001007144	1834	5468.69	1728.07	9209.31	5.32924	2.41393	8.52592e-94	1.13241e-89
chr18	+	27633008	27766069	18	Ctnna1	NM_001007145	3619	596.822	566.153	627.492	1.10834	0.148406	0.200603	0.620785
chr7	-	123054925	123063635	2	Tob2	NM_001007146	2275	205.606	221.496	189.715	0.856519	-0.223443	0.322517	0.78394
chr12	-	19476255	19509115	19	Sun1	NM_001007147	2465	63.3993	62.6978	64.1007	1.02237	0.0319241	0.872194	1
chr1	+	272540499	272705421	16	Btrc	NM_001007148	2313	70.9775	72.9998	68.9553	0.944596	-0.082231	0.592091	0.979103
chr5	+	2255013	2485906	12	Stau2	NM_001007149	2045	7.99754	8.95033	7.04476	0.787095	-0.34539	0.63351	0.997094
chr5	+	2306745	2390635	7	Stau2	NM_001007150	2466	0	0	0	NA	NA	NA	NA
chr4	+	204714825	205047901	62	Itpr1	NM_001007235	9757	0	0	0	NA	NA	NA	NA
chr14	+	22418686	22435535	6	Ugt2b37	NM_001007264	1882	875.75	878.218	873.283	0.994381	-0.00812987	0.910262	1
chr7	-	70558016	70584816	15	Os9	NM_001007265	2617	2088.58	2258.98	1918.18	0.849136	-0.235932	0.0436507	0.26966
chr5	-	163841376	163867441	8	Fblim1	NM_001007554	1414	2.13671	2.07877	2.19465	1.05575	0.0782615	1	1
chr13	+	104172507	104176284	4	Lefty2	NM_001007556	1129	0.135598	0.271196	0	0	#NAME?	1	1
chr9	-	8434334	8593088	22	Emr1	NM_001007557	3227	260.477	264.434	256.52	0.970072	-0.0438363	0.686124	1
chr9	+	7096163	7239092	16	Emr4	NM_001007558	2044	32.7211	35.0529	30.3893	0.866954	-0.205973	0.536155	0.942404
chr3	-	104701340	104703251	2	Fshb	NM_001007597	393	0	0	0	NA	NA	NA	NA
chr14	+	44343831	44347026	8	Rpl9	NM_001007598	690	5.10855	5.52732	4.68978	0.848474	-0.237058	0.818318	1
chr10	-	85510908	85514870	5	Rpl23	NM_001007599	488	432.186	556.748	307.624	0.552537	-0.855857	1.16575e-10	2.12547e-08
chrX	-	72916029	72919513	6	Rps4x	NM_001007600	884	2.00462	2.57451	1.43473	0.557282	-0.843521	0.695472	1
chr20	+	32486248	32491730	4	Pcbd1	NM_001007601	744	2271.31	2535.59	2007.03	0.791543	-0.33726	0.00206472	0.0322251
chr1	+	275040048	275050033	6	Gsto1	NM_001007602	878	956.398	1102.38	810.416	0.735151	-0.443888	0.000164888	0.00469632
chr5	-	21486033	21487196	4	Rps20	NM_001007603	503	1.96614	2.82405	1.10823	0.392425	-1.34951	0.484371	0.908289
chr8	-	66594523	66595857	3	Rplp1	NM_001007604	496	0	0	0	NA	NA	NA	NA
chr3	+	165321992	165324209	3	Svs3a	NM_001007605	2364	0	0	0	NA	NA	NA	NA
chr2	-	230689713	230705606	11	Sars	NM_001007606	1859	565.09	571.808	558.372	0.976502	-0.0343045	0.742994	1
chr10	-	15102509	15118524	11	Pigq	NM_001007607	3003	126.946	126.857	127.035	1.0014	0.0020152	0.980593	1
chr10	+	37368050	37382971	6	Skp1	NM_001007608	1214	998.797	1075.04	922.552	0.858155	-0.22069	0.0507942	0.296158
chr10	+	42738202	42750692	3	Mfap3	NM_001007609	1905	107.114	91.8867	122.341	1.33143	0.412977	0.0282433	0.203431
chr10	-	55914379	55931438	10	Wrap53	NM_001007610	1757	114.59	120.418	108.761	0.903193	-0.146894	0.476909	0.904255
chr10	+	63810533	63816789	3	Fam101b	NM_001007611	1362	1.22331	0.920871	1.52576	1.65686	0.728456	0.755176	1
chr10	+	69058108	69059959	3	Ccl7	NM_001007612	807	1.00955	1.53511	0.483998	0.315285	-1.66527	0.640721	1
chr10	-	94726625	94734161	14	Ddx5	NM_001007613	2382	1452.99	1384.2	1521.79	1.0994	0.136719	0.184098	0.594875
chr12	-	15997273	16025704	12	Wipi2	NM_001007615	1712	393.796	348.182	439.411	1.26202	0.33573	0.00577249	0.0683335
chr12	-	46762960	46783174	9	Wsb2	NM_001007616	1514	317.6	304.205	330.995	1.08807	0.121767	0.469573	0.8992
chr13	+	54160994	54177741	7	Nuak2	NM_001007617	2877	257.227	250.14	264.314	1.05666	0.079517	0.612114	0.987501
chr14	+	17533356	17548694	9	Rchy1	NM_001007618	1673	157.17	154.277	160.063	1.0375	0.0531125	0.626263	0.994118
chr14	+	2612361	2623812	4	Tmed5	NM_001007619	1813	357.693	287.127	428.259	1.49153	0.576797	9.93211e-05	0.00315594
chr15	+	22507947	22513890	10	Pdhb	NM_001007620	1787	880.207	902.664	857.751	0.950244	-0.0736299	0.344615	0.804425
chr15	-	38313181	38320467	9	Dhrs1	NM_001007621	1574	228.126	242.842	213.41	0.8788	-0.186393	0.24573	0.691626
chr15	-	55569715	55581479	10	Pdlim2	NM_001007622	1530	14.8166	14.9751	14.658	0.978821	-0.0308825	0.971119	1
chr16	-	7508455	7523705	6	Mettl6	NM_001007623	1645	74.1183	75.4627	72.7739	0.96437	-0.052342	0.89704	1
chr8	+	116642372	116650404	24	Qars	NM_001007624	2769	461.952	476.285	447.619	0.939813	-0.0895539	0.608388	0.985303
chr17	-	56066895	56091673	3	Epdr1	NM_001007625	2205	0.117635	0.235271	0	0	#NAME?	1	1
chr17	+	51649808	51662193	4	Ggps1	NM_001007626	2593	86.136	95.6609	76.611	0.80086	-0.320378	0.0999814	0.432981
chr18	+	68130749	68147701	8	Stard6	NM_001007627	1270	0.955522	0.870989	1.04005	1.19411	0.255934	1	1
chr18	+	28365064	28368320	2	Cxxc5	NM_001007628	2065	75.9009	70.8002	81.0016	1.14409	0.194197	0.276841	0.732241
chr19	+	48697684	48718959	5	Nutf2	NM_001007629	1929	130.966	126.117	135.814	1.07689	0.106876	0.676233	1
chr1	-	147672437	147750196	7	Zfand6	NM_001007630	1546	622.499	711.813	533.186	0.749054	-0.416859	0.000636619	0.0135073
chr20	+	31364395	31450469	11	Ascc1	NM_001007632	1485	144.42	155.58	133.259	0.856528	-0.223428	0.176264	0.583797
chr2	+	71520173	71532083	6	Mocs2	NM_001007633	1469	0	0	0	NA	NA	NA	NA
chr2	-	71808490	71810259	2	Pelo	NM_001007634	1479	159.693	173.265	146.121	0.843338	-0.245818	0.214687	0.64648
chr2	+	112320853	112387914	27	tGap1	NM_001007635	4122	0	0	0	NA	NA	NA	NA
chr2	-	209331130	209333683	2	S100a1	NM_001007636	285	3.43068	4.686	2.17535	0.464224	-1.10711	0.23128	0.670657
chr2	+	206691660	206697675	6	mrpl24	NM_001007637	1596	235.358	264.962	205.754	0.776543	-0.364862	0.0160869	0.140017
chr2	-	215908767	215912361	2	RGD1359334	NM_001007638	1232	0.135598	0.271196	0	0	#NAME?	1	1
chr2	+	226767138	226835174	14	St7l	NM_001007639	2514	104.594	98.0781	111.109	1.13287	0.179978	0.334325	0.79653
chr2	+	256794961	256806452	6	Ints12	NM_001007640	1494	37.0482	42.4564	31.64	0.745235	-0.424233	0.138894	0.518783
chr3	-	41757185	41774539	5	Rnd3	NM_001007641	2002	279.205	266.38	292.03	1.09629	0.132631	0.205096	0.628973
chr3	+	62667715	62674877	4	Phospho2	NM_001007642	2105	122.188	116.771	127.605	1.09278	0.128007	0.405721	0.857146
chr3	-	78594074	78601725	10	Tmx2	NM_001007643	1612	256.702	268.438	244.966	0.91256	-0.132008	0.369696	0.823461
chr4	+	149514308	149531683	3	MGC95152	NM_001007645	1581	77.3781	71.4576	83.2986	1.16571	0.221204	0.203286	0.625826
chr4	+	151819738	151885188	10	Fkbp9	NM_001007646	3005	311.349	324.601	298.098	0.918353	-0.122879	0.506731	0.923384
chr4	-	164992845	164999568	6	Rnf181	NM_001007647	1795	564.888	568.327	561.448	0.987896	-0.0175688	0.796459	1
chr4	+	224365695	224369284	6	Cdca3	NM_001007648	1496	2.189	2.89861	1.47939	0.51038	-0.970358	0.497445	0.916556
chr5	-	151411346	151412996	2	Tssk3	NM_001007650	1003	0.117635	0.235271	0	0	#NAME?	1	1
chr5	+	152039087	152062354	5	Pef1	NM_001007651	1498	136.303	138.652	133.954	0.966118	-0.0497286	0.630087	0.994674
chr5	-	82500184	82503419	4	Pole3	NM_001007652	2599	121.443	130.79	112.095	0.857061	-0.222531	0.239667	0.681493
chr5	+	147824052	147834646	8	Mrps15	NM_001007653	2200	146.404	163.316	129.492	0.792893	-0.334801	0.0249979	0.187304
chr5	-	168546217	168556520	5	Agtrap	NM_001007654	2156	102.197	98.0431	106.352	1.08474	0.117353	0.721728	1
chr5	+	176848286	176862702	8	Ube2j2	NM_001007655	1603	186.937	192.523	181.351	0.941966	-0.0862525	0.559262	0.956336
chr6	-	36695658	36706479	8	Mapre3	NM_001007656	1813	177.03	179.761	174.299	0.969611	-0.0445214	0.662905	1
chr7	+	12426181	12428310	2	RGD1359127	NM_001007657	1617	129.563	131.634	127.492	0.968535	-0.0461241	0.747609	1
chr7	+	115861664	115864842	2	Them6	NM_001007658	1542	113.704	105.474	121.933	1.15605	0.209201	0.304608	0.766266
chr7	+	140730273	140739416	4	RGD1359310	NM_001007659	1420	10.259	10.1806	10.3375	1.01541	0.0220643	1	1
chr8	+	11846050	11885451	10	Ccdc82	NM_001007660	3024	31.6279	36.2303	27.0254	0.745934	-0.42288	0.131949	0.505787
chr8	+	28064822	28073704	8	Thyn1	NM_001007661	955	77.2945	86.5052	68.0839	0.78705	-0.345474	0.105609	0.44829
chr8	-	47670181	47694935	11	Arcn1	NM_001007662	3453	1809.25	1691.39	1927.12	1.13937	0.188235	0.120669	0.480858
chr8	+	70145690	70170130	14	Vwa9	NM_001007663	1831	65.8139	65.5182	66.1096	1.00903	0.0129635	0.970891	1
chr8	+	114514610	114518648	4	Abhd14b	NM_001007664	1575	2693.52	3029.75	2357.3	0.77805	-0.362066	0.0017774	0.0286846
chr8	-	114720829	114748300	6	Tex264	NM_001007665	1459	669.085	762.888	575.282	0.754084	-0.407203	0.00219865	0.0336823
chr9	+	81630646	81634580	8	Bcs1l	NM_001007666	1650	96.0258	99.789	92.2625	0.924576	-0.113137	0.444041	0.885016
chrX	+	43930759	43934047	6	Sat1	NM_001007667	1166	695.414	750.192	640.635	0.853961	-0.227757	0.0815772	0.387659
chr10	+	9656364	9661130	3	Ubald1	NM_001007668	2634	0	0	0	NA	NA	NA	NA
chr10	-	43545158	43553389	3	Zfp672	NM_001007669	2921	115.924	104.877	126.97	1.21066	0.275799	0.172572	0.578228
chr10	-	55252747	55258298	5	Odf4	NM_001007670	1433	0.748319	0.456584	1.04005	2.2779	1.18771	0.72884	1
chr10	-	59082544	59098781	4	Cyb5d2	NM_001007671	1457	22.0591	23.6462	20.472	0.865764	-0.207954	0.545538	0.948734
chr10	+	67842259	67853168	7	Tmem98	NM_001007672	1410	389.705	489.562	289.848	0.592056	-0.756194	1.81992e-08	1.90332e-06
chr10	+	77616853	77645126	7	Mmd	NM_001007673	2642	5.07995	7.45807	2.70183	0.362269	-1.46487	0.062279	0.331805
chr10	+	104101680	104114608	7	Slc25a19	NM_001007674	1474	13.7685	15.7533	11.7837	0.748018	-0.418856	0.493068	0.913377
chr10	+	107090842	107111040	4	C1qtnf1	NM_001007675	1534	72.4154	81.5825	63.2483	0.775268	-0.367233	0.065542	0.341813
chr11	-	67294268	67318850	7	Timmdc1	NM_001007676	1335	214.861	215.804	213.918	0.99126	-0.0126639	0.98338	1
chr19	+	36790825	36793693	4	Lyl1	NM_001007677	1459	14.2173	18.5971	9.83762	0.528988	-0.918694	0.0535316	0.305522
chr2	+	185165819	185177314	2	Rabif	NM_001007678	3576	0	0	0	NA	NA	NA	NA
chr13	+	114572891	114597478	8	Tmem206	NM_001007679	1396	6.24759	6.79071	5.70447	0.84004	-0.251469	0.742958	1
chr15	-	22614362	22661344	9	Abhd6	NM_001007680	2202	349.118	328.605	369.631	1.12485	0.169731	0.332198	0.79483
chr15	-	32213644	32217278	4	Zfp219	NM_001007681	2806	130.777	138.746	122.809	0.885133	-0.176033	0.318984	0.780967
chr15	+	37642562	37646202	2	Thtpa	NM_001007682	2509	310.074	332.983	287.164	0.862398	-0.213574	0.0991186	0.431354
chr16	+	7011032	7025989	10	Glt8d1	NM_001007683	1619	64.9051	69.9227	59.8874	0.85648	-0.223509	0.266715	0.719145
chr16	-	19084195	19086146	3	Klf2	NM_001007684	1056	32.6841	30.9303	34.4379	1.1134	0.154973	0.569053	0.961231
chr8	-	116576637	116581366	6	Klhdc8b	NM_001007685	1828	3.32917	5.13007	1.52827	0.297903	-1.74708	0.0767539	0.374584
chr16	-	79403685	79413576	3	Cln8	NM_001007686	2224	154.196	158.023	150.369	0.95156	-0.071634	0.64569	1
chr18	-	80511682	80534735	11	Cndp1	NM_001007687	2641	43.7793	41.5241	46.0345	1.10862	0.148768	0.684214	1
chr18	-	63201099	63298831	6	Fam210a	NM_001007688	9508	710.435	696.186	724.683	1.04093	0.0578784	0.646799	1
chr19	+	10591815	10604728	9	Ciapin1	NM_001007689	1779	325.485	285.577	365.393	1.27949	0.355568	0.00646808	0.0744446
chr1	+	7018428	7039844	3	Fbxo30	NM_001007690	3208	37.7279	40.2222	35.2335	0.875971	-0.191045	0.492151	0.91298
chr1	-	160037250	160045625	2	Prss23	NM_001007691	1852	92.256	95.0959	89.416	0.940271	-0.0888507	0.594558	0.98001
chr1	-	204767468	204782663	8	Nfatc2ip	NM_001007692	1474	13.7941	11.7088	15.8794	1.35619	0.439561	0.336717	0.798509
chr1	-	231943186	231952715	4	Ttc9c	NM_001007693	2012	112.324	110.274	114.373	1.03717	0.0526503	0.793463	1
chr1	+	260127718	260132860	3	Ifit3	NM_001007694	2026	28.6084	25.249	31.9678	1.2661	0.34039	0.177143	0.584813
chr20	-	9848948	9858712	10	Tcp11	NM_001007695	1934	0.45144	0.5549	0.347981	0.627105	-0.673221	1	1
chr2	+	215163443	215168161	7	mrpl9	NM_001007696	1418	228.534	249.056	208.012	0.8352	-0.259807	0.0925571	0.415944
chr2	-	215925755	215953662	8	Prune	NM_001007697	1697	55.2835	55.648	54.919	0.986899	-0.0190252	0.931712	1
chr2	+	217210323	217235989	4	Golph3l	NM_001007698	1747	51.2649	41.0691	61.4607	1.49652	0.581611	0.0247458	0.185993
chr2	-	228528578	228569428	9	Cept1	NM_001007699	2122	740.139	720.557	759.72	1.05435	0.0763559	0.422902	0.868335
chrX	-	88235923	88245064	7	M6pr	NM_001007700	2257	117.163	122.417	111.909	0.914164	-0.129475	0.310846	0.770847
chr5	+	10062170	10138210	11	Tram1	NM_001007701	2755	4260.72	4450.97	4070.48	0.914514	-0.128922	0.208255	0.635143
chr5	-	55229459	55254965	11	RGD1359108	NM_001007702	3410	57.8433	55.4573	60.2293	1.08605	0.119086	0.647824	1
chr5	-	176789843	176793929	3	Gltpd1	NM_001007703	1973	113.44	102.847	124.032	1.20599	0.270213	0.200323	0.620178
chr6	+	2785888	2837635	7	Galm	NM_001007704	2165	1147.24	1382.05	912.437	0.660207	-0.59901	1.272e-06	7.67942e-05
chr6	+	135842579	135862543	11	Ubr7	NM_001007705	3250	287.11	240.143	334.077	1.39116	0.476287	0.000627351	0.0134083
chr6	-	144259957	144265948	4	Trmt61a	NM_001007706	1834	65.7418	55.5174	75.9662	1.36833	0.452418	0.110036	0.458877
chr7	+	117422048	117424838	6	Fam203a	NM_001007707	2261	111.201	106.162	116.24	1.09494	0.130847	0.532785	0.940767
chr7	-	120366952	120374272	6	RGD1359634	NM_001007708	1384	8.57164	8.99377	8.1495	0.906127	-0.142214	0.70339	1
chr7	+	121451109	121463407	6	Smcr7l	NM_001007709	2124	232.701	194.961	270.441	1.38715	0.472127	0.00179233	0.0288905
chr8	-	104171293	104237198	6	Acpl2	NM_001007710	2829	101.023	113.86	88.185	0.774503	-0.368657	0.0528699	0.302775
chr9	+	9033677	9043040	13	Gtf2f1	NM_001007711	1676	101.482	99.1244	103.84	1.04758	0.0670566	0.574328	0.965774
chr9	-	54940737	54952755	2	Sdpr	NM_001007712	2121	75.3418	78.3933	72.2903	0.922149	-0.116928	0.566913	0.960224
chr9	-	81335835	81344478	11	Tmbim1	NM_001007713	2052	40.8607	38.9854	42.736	1.09621	0.132519	0.619774	0.991087
chrX	-	107278230	107289323	4	Morf4l2	NM_001007714	1823	431.264	436.391	426.136	0.976502	-0.0343056	0.682979	1
chrX	+	21736680	21747814	8	Ribc1	NM_001007715	1488	19.6246	22.1238	17.1253	0.774066	-0.369471	0.307676	0.768148
chr14	+	21986918	22004148	8	ste2	NM_001007718	1279	3.00865	1.55659	4.46071	2.86569	1.51888	0.185163	0.596551
chr2	-	220148045	220229494	9	Hsd3b1	NM_001007719	1357	0	0	0	NA	NA	NA	NA
chr3	+	63767469	63782078	9	Gorasp2	NM_001007720	2058	845.208	784.312	906.103	1.15528	0.208249	0.138662	0.518397
chr10	+	4254719	4288863	5	Emp2	NM_001007721	3130	23.1754	21.1504	25.2004	1.19149	0.252766	0.374599	0.827577
chr10	-	15484458	15485302	3	Hba2	NM_001007722	544	447.619	525.649	369.589	0.703109	-0.508179	0.513804	0.928023
chr10	-	88135606	88149785	11	Nt5c3b	NM_001007723	1666	28.9834	29.5534	28.4135	0.961427	-0.0567505	0.804001	1
chr10	-	90867137	90889424	5	Dcakd	NM_001007724	1709	118.598	117.608	119.588	1.01684	0.0240925	0.806098	1
chr10	-	94317973	94324597	7	Icam2	NM_001007725	1364	53.5919	58.3372	48.8467	0.837317	-0.256155	0.311297	0.771135
chr10	+	102925917	102959579	13	Dnai2	NM_001007726	2897	0	0	0	NA	NA	NA	NA
chr13	-	47327522	47368232	3	Lypd1	NM_001007727	2013	0.639812	0.727779	0.551844	0.758258	-0.39924	1	1
chr13	-	88685409	88722184	6	Mpzl1	NM_001007728	2268	27.4363	29.902	24.9707	0.835084	-0.260007	0.435186	0.878442
chr14	-	18758190	18758900	3	Pf4	NM_001007729	318	6.31989	7.36727	5.27251	0.715666	-0.482642	0.623924	0.993991
chr14	-	85644748	85655131	5	Cabp7	NM_001007730	2994	0	0	0	NA	NA	NA	NA
chr16	+	73198500	73213646	5	Golga7	NM_001007731	1979	246.662	251.312	242.011	0.962989	-0.0544092	0.762634	1
chr17	-	34542624	34554071	7	Serpinb9	NM_001007732	1810	97.3606	94.0214	100.7	1.07103	0.0990011	0.609374	0.985724
chr17	-	78043450	78066592	10	Nudt5	NM_001007733	1343	36.4738	36.5613	36.3863	0.995213	-0.0069228	0.863849	1
chr1	-	32308390	32350239	6	Echdc1	NM_001007734	1865	166.667	188.701	144.632	0.766462	-0.383714	0.0588816	0.321255
chr1	+	85510197	85513465	2	Sertad1	NM_001007735	1169	71.7983	91.704	51.8927	0.565872	-0.821453	0.0725609	0.363544
chr1	-	233990663	234001238	4	Tmem109	NM_001007736	1892	169.058	180.276	157.841	0.875548	-0.191741	0.238281	0.678861
chr1	-	246496969	246553306	4	RGD1359158	NM_001007737	1348	2.57754	2.358	2.79707	1.1862	0.246352	0.76938	1
chr1	+	249846441	249851701	2	Tmem252	NM_001007738	2052	34.4002	34.6802	34.1202	0.983851	-0.023488	0.84706	1
chr20	+	33095743	33108151	7	Sar1a	NM_001007739	2627	1299.99	1244.18	1355.81	1.08972	0.12396	0.247238	0.693518
chr20	-	33874997	33903564	9	Vps26a	NM_001007740	1261	248.877	238.305	259.449	1.08873	0.122643	0.394527	0.849563
chr2	+	206705208	206714694	4	Isg20l2	NM_001007741	1631	1.70384	1.37474	2.03294	1.47878	0.564408	0.620698	0.991712
chr3	-	8815481	8838290	10	Ubac1	NM_001007742	1804	100.158	109.364	90.9524	0.831652	-0.265949	0.185064	0.596551
chr3	-	17081163	17086012	7	Cdk9	NM_001007743	1675	357.934	355.957	359.91	1.0111	0.0159312	0.81948	1
chr3	+	17132598	17136665	5	Tor2a	NM_001007744	1495	260.361	307.209	213.513	0.695008	-0.524898	0.000601296	0.0130925
chr4	-	187412089	187427229	12	Tmem43	NM_001007745	2855	53.989	59.0147	48.9633	0.829679	-0.269374	0.219908	0.654184
chr5	+	28086458	28105348	6	MGC94199	NM_001007746	4038	0	0	0	NA	NA	NA	NA
chr5	+	138791234	138801110	22	Pomgnt1	NM_001007747	2712	167.933	159.023	176.843	1.11206	0.153232	0.371533	0.82523
chr6	+	58209470	58215203	7	Tmem18	NM_001007748	1444	50.6833	43.4997	57.8668	1.33028	0.411729	0.0855137	0.396992
chr6	+	101507335	101525542	5	Atp5s	NM_001007749	1991	48.4416	48.3549	48.5282	1.00358	0.00516037	1	1
chr7	-	29150842	29177859	9	Chpt1	NM_001007750	1534	1345.47	1281.52	1409.42	1.0998	0.137244	0.28096	0.737929
chr7	-	117774183	117776528	3	MGC94207	NM_001007751	1743	354.925	366.427	343.424	0.937222	-0.093538	0.453676	0.89111
chr8	-	74012276	74033156	10	Mns1	NM_001007752	1795	0.614353	0.721525	0.507182	0.702931	-0.508546	1	1
chr8	-	115651587	115654110	3	Cyb561d2	NM_001007753	1464	68.0331	79.7296	56.3366	0.706595	-0.501044	0.018034	0.150393
chr8	+	115667337	115674549	5	Rassf1	NM_001007754	1576	26.9773	34.0768	19.8779	0.583327	-0.777624	0.0377792	0.245251
chr9	+	98115049	98135543	12	Scly	NM_001007755	2135	624.281	645.781	602.782	0.933415	-0.0994095	0.609557	0.985724
chrX	-	30198506	30217341	4	Gemin8	NM_001007756	1160	9.22833	10.0077	8.44894	0.844242	-0.244271	0.772113	1
chrX	-	105455042	105457641	3	Armcx6	NM_001007757	1931	1.27872	1.4942	1.06324	0.711579	-0.490905	0.765548	1
chr15	+	61872646	61903369	10	Nufip1	NM_001007758	1636	80.3753	71.5008	89.2498	1.24823	0.319889	0.0901224	0.409513
chr18	-	51040239	51192562	5	2003-03-01	NM_001007759	1772	29.1433	29.63	28.6566	0.967146	-0.0481945	0.902294	1
chr4	-	7308532	7323114	16	Abcb8	NM_001007796	2145	170.217	169.878	170.556	1.00399	0.0057498	0.82955	1
chr2	+	8617991	8627696	8	Arrdc3	NM_001007797	1245	681.693	676.248	687.139	1.0161	0.0230487	0.770488	1
chrX	-	105250665	105279934	16	Btk	NM_001007798	1817	13.9763	13.6443	14.3083	1.04866	0.0685504	0.787633	1
chr3	-	66478180	66507756	10	Cir1	NM_001007799	1356	75.9472	78.7086	73.1858	0.929832	-0.104958	0.748223	1
chr10	+	9492842	9526484	16	Glyr1	NM_001007800	1659	526.833	480.047	573.62	1.19493	0.25692	0.0460307	0.27833
chr9	-	16011984	16017295	9	Yipf3	NM_001007801	2384	550.601	562.929	538.273	0.9562	-0.0646151	0.59567	0.980423
chr8	+	122101290	122117000	5	Cmtm6	NM_001007802	593	163.211	139.904	186.517	1.33318	0.414873	0.014945	0.133221
chr8	+	70480935	70534998	14	Clpx	NM_001007803	1902	2330.15	1780.07	2880.22	1.61804	0.694246	9.51971e-10	1.42068e-07
chr10	+	83661433	83673397	8	Snf8	NM_001007804	777	330.825	373.235	288.415	0.772742	-0.371941	0.00526234	0.0634826
chr3	+	181692297	181698641	7	Psma7	NM_001008217	908	468.433	536.862	400.005	0.745079	-0.424535	0.00124145	0.0221574
chr10	-	13883206	13888420	22	Tbl3	NM_001008277	2501	186.992	168.823	205.161	1.21524	0.281244	0.0783262	0.378134
chr10	+	37195756	37205192	3	Cdkn2aipnl	NM_001008278	1782	136.351	142.156	130.546	0.91833	-0.122916	0.473699	0.9017
chr10	-	46728478	46742400	30	Flii	NM_001008279	4000	365.207	375.136	355.279	0.947068	-0.0784604	0.573773	0.965521
chr10	+	82171006	82185664	7	Lrrc59	NM_001008280	2802	677.768	635.417	720.119	1.1333	0.180532	0.240706	0.683425
chr10	+	86395551	86407493	12	Psmd3	NM_001008281	2121	754.706	747.648	761.765	1.01888	0.0269875	0.750745	1
chr10	+	103720859	103725037	8	Galk1	NM_001008282	1324	708.56	887.96	529.161	0.595929	-0.746788	5.46933e-09	6.72627e-07
chr10	+	105446490	105451152	5	Mettl23	NM_001008283	901	110.451	122.007	98.8947	0.810565	-0.303	0.054677	0.307524
chr11	-	90833004	90867428	3	Crkl	NM_001008284	2773	36.4996	34.0349	38.9642	1.14483	0.195134	0.491264	0.911946
chr11	-	65358816	65400932	18	Spice1	NM_001008285	3025	75.7685	81.8787	69.6583	0.85075	-0.233193	0.247719	0.694335
chr3	+	68216582	68279582	10	Mtx2	NM_001008286	1213	267.731	285.789	249.672	0.873623	-0.194918	0.184375	0.595397
chr11	-	35446569	35456223	9	Donson	NM_001008287	2214	16.8804	15.8883	17.8725	1.12489	0.169778	0.636987	0.999264
chr11	-	34705578	34714961	7	RGD1306954	NM_001008288	1153	178.01	193.429	162.591	0.840571	-0.250559	0.144276	0.5298
chr12	+	31858314	31867474	5	Sbds	NM_001008289	1396	121.675	125.522	117.829	0.938715	-0.0912407	0.767397	1
chr12	+	41560317	41569459	7	Fam216a	NM_001008290	1244	49.9819	42.8981	57.0656	1.33026	0.411709	0.0879546	0.404506
chr12	-	52077897	52090133	14	Tfip11	NM_001008291	3500	239.653	230.569	248.736	1.07879	0.109414	0.434602	0.878416
chr12	+	40372112	40385227	6	Diablo	NM_001008292	1308	4.75334	4.39857	5.10812	1.16131	0.215757	1	1
chr13	-	102830290	102848026	8	Tfb2m	NM_001008293	2067	145.35	142.101	148.599	1.04573	0.0645146	0.635579	0.998403
chr14	-	35976769	36034611	16	Fip1l1	NM_001008295	1896	137.278	121.068	153.487	1.26778	0.342301	0.0330199	0.224908
chr15	-	38149134	38153351	5	Emc9	NM_001008296	818	12.6598	14.436	10.8836	0.753923	-0.407512	0.463187	0.896729
chr16	+	3783383	3787313	4	Fam213a	NM_001008297	1184	124.814	132.111	117.517	0.889527	-0.168889	0.25115	0.699177
chr17	-	55791549	55825467	9	Stard3nl	NM_001008298	1270	110.622	116.057	105.187	0.906332	-0.141889	0.491884	0.912714
chr18	+	63299069	63319607	11	Rnmt	NM_001008299	2019	133.044	116.303	149.786	1.28789	0.365013	0.033566	0.227345
chr18	+	59595642	59921504	32	Nedd4l	NM_001008300	4153	634.785	533.412	736.158	1.38009	0.464766	0.000125994	0.0038648
chr18	-	1221704	1259299	16	Usp14	NM_001008301	2126	191.025	176.975	205.076	1.15878	0.212611	0.176041	0.583378
chr1	-	54248196	54264093	8	Sft2d1	NM_001008302	972	145.75	154.177	137.324	0.890688	-0.167009	0.335694	0.797619
chr1	-	85210608	85219232	7	Snrpa	NM_001008303	1146	47.0764	45.9793	48.1735	1.04772	0.0672573	0.912666	1
chr1	-	101923968	101930515	12	Ptov1	NM_001008304	1723	810.301	885.28	735.322	0.83061	-0.267756	0.0224451	0.174597
chr1	+	227675717	227681017	7	Eif1ad	NM_001008305	2510	140.609	137.385	143.833	1.04693	0.0661663	0.587152	0.975156
chr1	-	274338777	274344504	3	Calhm2	NM_001008306	1833	23.8002	25.8179	21.7824	0.843693	-0.245209	0.462509	0.896369
chr20	+	14030704	14064392	6	Fam207a	NM_001008307	1733	75.0849	77.5457	72.6241	0.936532	-0.0945996	0.639228	1
chr20	-	34255575	34285599	10	Zufsp	NM_001008308	1992	67.3213	70.1983	64.4442	0.918031	-0.123386	0.569823	0.96192
chr2	-	47518637	47525723	6	Btf3	NM_001008309	861	3.30644	3.91105	2.70183	0.69082	-0.533619	0.634385	0.997094
chr2	+	83676998	83678429	1	Rxfp3	NM_001008310	1431	0.138725	0.27745	0	0	#NAME?	1	1
chr3	-	49193349	49199006	3	Ermn	NM_001008311	1780	0	0	0	NA	NA	NA	NA
chr3	-	166209486	166228921	10	Serinc3	NM_001008312	2145	1339.49	1354.47	1324.51	0.977884	-0.0322645	0.746133	1
chr4	+	145910681	145924082	6	Cbx3	NM_001008313	1718	1.58973	2.55556	0.623903	0.244135	-2.03425	0.135139	0.511665
chr4	+	210801432	210819194	8	Mkrn2	NM_001008314	2211	103.101	112.324	93.8794	0.835794	-0.258781	0.184098	0.594875
chr4	-	224839882	224846284	10	Ltbr	NM_001008315	2075	1187.33	1311.23	1063.42	0.811008	-0.302212	0.00936008	0.0962234
chr5	-	21569209	21577465	4	Plag1	NM_001008316	3335	3.05324	2.94384	3.16264	1.07433	0.103433	0.875195	1
chr5	-	68455220	68548182	12	Erp44	NM_001008317	1411	938.352	963.426	913.278	0.947948	-0.0771197	0.444248	0.885112
chr6	+	1524702	1535939	10	Ndufaf7	NM_001008318	2372	39.48	39.2304	39.7296	1.01273	0.0182426	0.960397	1
chr14	-	83349563	83383727	9	Maea	NM_001008319	2151	542.209	554.343	530.076	0.956224	-0.0645788	0.619671	0.991087
chr6	+	107702936	107785231	5	Rhoj	NM_001008320	1832	17.8895	17.4805	18.2985	1.0468	0.0659832	0.926984	1
chr7	-	11813535	11815565	4	Gadd45b	NM_001008321	1276	24.9048	35.2195	14.5901	0.414261	-1.27139	0.0615302	0.329667
chr7	-	70998103	71003174	12	Shmt2	NM_001008322	2045	1652.77	1593.48	1712.07	1.07442	0.103554	0.701527	1
chr7	-	123158884	123169142	8	Pmm1	NM_001008323	1198	81.8739	93.4719	70.2759	0.751839	-0.411504	0.168919	0.572119
chr7	+	141476182	141497940	15	Eif4b	NM_001008324	3659	727.609	774.296	680.921	0.879406	-0.185399	0.214847	0.646634
chr8	+	39687949	39703275	4	Tmem218	NM_001008325	973	89.5624	101.327	77.7981	0.767795	-0.381206	0.0798091	0.381716
chr8	-	51395454	51407172	7	Rexo2	NM_001008326	1185	268.113	285.852	250.375	0.875891	-0.191177	0.223405	0.659392
chr8	+	71455248	71467171	5	Fam96a	NM_001008327	1142	293.569	314.877	272.261	0.864658	-0.209799	0.114072	0.466752
chr8	-	114537731	114543478	11	Parp3	NM_001008328	2100	180.119	187.725	172.514	0.918976	-0.1219	0.318858	0.780967
chr8	-	131184117	131187471	3	RGD1311745	NM_001008329	778	45.3557	46.374	44.3375	0.956085	-0.0647885	0.746884	1
chr9	+	16017435	16021548	9	Polr1c	NM_001008330	1290	240.54	246.176	234.905	0.954215	-0.0676135	0.616636	0.989785
chr9	-	85231502	85280641	11	Wdfy1	NM_001008331	1360	85.0813	83.1925	86.9701	1.04541	0.0640652	0.951542	1
chr9	-	88062425	88104120	7	Col4a4	NM_001008332	1152	2.85271	3.1589	2.54652	0.806141	-0.310896	0.764716	1
chr4	-	247795749	247822690	7	Amn1	NM_001008333	1243	35.7942	34.3697	37.2188	1.0829	0.114895	0.674157	1
chr10	+	65823081	65832165	3	Tmem97	NM_001008334	1242	713.197	755.044	671.351	0.889155	-0.169493	0.131189	0.504183
chr11	-	84411364	84417958	11	Eif4a2	NM_001008335	1880	951.296	987.004	915.589	0.927645	-0.108356	0.551737	0.951867
chr11	-	74431229	74470437	15	Tnk2	NM_001008336	4225	127.839	157.755	97.9236	0.620732	-0.687957	0.0194492	0.157707
chr11	+	50229231	50234310	2	Trmt10c	NM_001008337	2623	121.073	120.262	121.884	1.01348	0.0193204	0.768361	1
chr14	-	5077922	5093047	2	Lrrc8d	NM_001008338	3149	494.096	400.975	587.217	1.46447	0.550382	0.000156834	0.00455815
chr14	+	82778076	82802152	11	Nelfa	NM_001008339	2191	110.211	109.079	111.343	1.02076	0.0296398	0.975104	1
chr16	-	70327539	70332022	3	Thap1	NM_001008340	964	38.6638	41.7115	35.616	0.853866	-0.227918	0.432897	0.87702
chr17	+	40954517	40963575	6	Prl7a4	NM_001008341	952	0	0	0	NA	NA	NA	NA
chr17	+	71079216	71093697	10	Akr1e2	NM_001008342	1342	580.433	605.544	555.321	0.917061	-0.12491	0.218201	0.651505
chr18	-	80841875	80846335	6	Timm21	NM_001008343	1318	70.2934	83.8397	56.747	0.676851	-0.56309	0.00357873	0.0480614
chr18	-	27409447	27436622	11	Etf1	NM_001008344	2264	192.029	192.076	191.982	0.999514	-0.000701774	1	1
chr1	+	146966068	146971740	3	Mesdc2	NM_001008345	1992	231.338	243.722	218.954	0.898376	-0.154609	0.234996	0.674712
chr1	-	177580521	177584545	7	Rrp8	NM_001008346	2072	32.0283	24.1824	39.8743	1.64889	0.721499	0.0105888	0.105113
chr1	+	212790892	212897409	11	Fank1	NM_001008347	1292	0	0	0	NA	NA	NA	NA
chr1	-	228146287	228166896	11	Frmd8	NM_001008348	2879	90.8754	91.6768	90.0741	0.982518	-0.0254438	0.965331	1
chr1	+	273483942	273490197	22	Nfkb2	NM_001008349	3070	72.7045	78.5422	66.8667	0.851348	-0.232179	0.267864	0.720782
chr20	-	9678688	9684785	5	Taf11	NM_001008350	1188	38.4391	38.876	38.0022	0.977523	-0.0327971	0.832001	1
chr20	-	13587479	13594340	7	RGD1309594	NM_001008351	1751	65.789	69.3927	62.1852	0.896135	-0.158212	0.360409	0.817187
chr2	+	208198237	208207794	5	Pmvk	NM_001008352	975	244.84	264.71	224.97	0.849872	-0.234683	0.254637	0.702669
chr3	-	136347547	136365793	6	Mkks	NM_001008353	2948	175.945	182.893	168.996	0.924018	-0.114007	0.302052	0.763245
chr3	+	20773164	20829832	7	Mrrf	NM_001008354	3576	153.67	161.759	145.581	0.899985	-0.152027	0.270379	0.72404
chr4	-	208768760	208784670	8	Emc3	NM_001008355	1898	333.652	341.61	325.695	0.953412	-0.0688284	0.534104	0.941531
chr7	+	11712436	11718438	4	Slc39a3	NM_001008356	1361	258.452	283.008	233.895	0.826461	-0.274981	0.058185	0.318423
chr7	-	27226469	27255042	14	Hcfc2	NM_001008357	2273	49.6	50.0843	49.1158	0.980662	-0.0281717	0.782558	1
chr7	+	139636745	139642342	8	Tmem106c	NM_001008358	1400	56.9645	58.5764	55.3526	0.944963	-0.0816697	0.702903	1
chr17	-	2400210	2405996	3	Spata31a5	NM_001008359	3275	0	0	0	NA	NA	NA	NA
chr10	+	9734341	9756550	7	Cdip1	NM_001008360	2580	620.532	667.018	574.045	0.860614	-0.216563	0.0425854	0.2653
chr10	+	57013968	57018256	9	Rnf167	NM_001008361	1861	348.729	361.129	336.328	0.931324	-0.102645	0.445858	0.886252
chr12	-	13197572	13213969	4	Zfp655	NM_001008362	3994	22.6743	23.0615	22.2871	0.966419	-0.0492799	1	1
chr12	+	19239056	19250441	7	Zfand2a	NM_001008363	3194	85.5083	78.9147	92.1019	1.16711	0.222937	0.208604	0.635769
chr18	+	47416794	47569096	7	Snx24	NM_001008364	2191	291.45	272.877	310.023	1.13613	0.184124	0.140278	0.52144
chr19	+	25505007	25539012	15	Tom1	NM_001008365	2200	443.54	449.17	437.911	0.974932	-0.0366266	0.612001	0.987501
chr19	+	60248981	60271294	12	Cenpn	NM_001008366	1838	10.0729	11.4209	8.72486	0.763937	-0.388475	0.486211	0.908642
chr1	-	75991119	76011769	6	Isoc2b	NM_001008367	1045	258.514	263.641	253.387	0.961109	-0.0572285	0.592423	0.979286
chr1	+	88130544	88153086	15	Sirt2	NM_001008368	2044	480.315	498.71	461.92	0.92623	-0.110558	0.322892	0.784605
chr1	+	226219371	226232745	24	Pitpnm1	NM_001008369	4165	41.9612	38.703	45.2193	1.16837	0.224494	0.268538	0.721424
chr1	-	233493735	233518545	4	Sdhaf2	NM_001008371	1856	384.655	382.848	386.463	1.00944	0.0135574	0.936212	1
chr2	-	41945287	41995921	15	Papd4	NM_001008372	1848	270.995	265.439	276.551	1.04186	0.0591671	0.748709	1
chr7	+	122151953	122156374	2	Srek1ip1	NM_001008373	2282	152.162	160.082	144.241	0.901046	-0.150327	0.295952	0.756513
chr2	-	147587582	147603481	3	Pgrmc2	NM_001008374	1829	1701.44	1313.57	2089.3	1.59056	0.669531	1.14269e-08	1.28621e-06
chr2	+	261708665	261721120	7	Lamtor3	NM_001008375	1218	125.024	119.394	130.653	1.0943	0.130008	0.485671	0.908642
chr5	+	148049386	148062970	5	Trappc3	NM_001008376	1224	256.738	271.75	241.726	0.889515	-0.168909	0.230715	0.670537
chr6	+	146389787	146396584	5	RGD1307315	NM_001008377	1675	6.45265	6.06472	6.84057	1.12793	0.173676	0.820084	1
chr7	-	70530382	70533257	6	Tspan31	NM_001008378	1454	1648.32	1690.33	1606.31	0.950295	-0.0735527	0.432151	0.876275
chr7	+	141857063	141860371	4	Prr13	NM_001008379	778	163.909	168.16	159.657	0.949434	-0.0748603	0.728811	1
chr8	-	69480085	69516482	17	Dis3l	NM_001008380	3206	170.82	172.834	168.806	0.976693	-0.0340232	0.944167	1
chr9	+	98070734	98105363	9	Ube2f	NM_001008381	1119	131.908	124.017	139.798	1.12725	0.172807	0.213234	0.643238
chr10	+	43332174	43345136	8	Cnot8	NM_001008382	2145	228.497	245.932	211.062	0.858212	-0.220594	0.150393	0.542361
chr19	-	48813853	48819507	10	Dpep3	NM_001008383	1662	0.402282	0.456584	0.347981	0.762139	-0.391873	1	1
chr7	-	119772956	119786147	7	Rac2	NM_001008384	1303	115.063	107.775	122.351	1.13524	0.183	0.381763	0.835625
chr18	+	61365055	61369043	3	Pmaip1	NM_001008385	318	0.135598	0.271196	0	0	#NAME?	1	1
chr6	+	65492816	65769835	10	Ispd	NM_001008386	2630	30.4324	25.9254	34.9394	1.34769	0.430488	0.186573	0.599146
chr4	+	142998499	143001333	2	Gimap9	NM_001008398	1700	13.0163	12.7279	13.3046	1.04531	0.0639309	0.953086	1
chr10	+	46837697	46884559	7	Dhrs7b	NM_001008507	1214	149.483	172.698	126.268	0.731149	-0.451762	0.00437033	0.0556536
chr12	-	52099685	52111434	6	Tpst2	NM_001008508	1731	526.804	526.249	527.358	1.00211	0.00303501	0.88804	1
chr18	-	27112309	27132659	21	Brd8	NM_001008509	3296	163.053	166.433	159.672	0.959376	-0.0598325	0.854772	1
chr1	+	141576455	141582790	3	Isg20	NM_001008510	789	15.0413	16.196	13.8867	0.857419	-0.221928	0.782298	1
chr1	-	229159582	229169579	7	Esrra	NM_001008511	2157	297.261	307.84	286.682	0.931272	-0.102726	0.562335	0.957372
chr1	-	24052951	24056922	2	Taar2	NM_001008512	1020	0	0	0	NA	NA	NA	NA
chr5	-	62722613	62723718	4	Ccl21	NM_001008513	838	43.6382	57.3302	29.9463	0.522347	-0.936919	0.0975598	0.426808
chr5	+	142113779	142118477	4	Cldn19	NM_001008514	1594	0.239636	0.271196	0.208076	0.767254	-0.382223	1	1
chr5	-	159023752	159026600	3	C1qa	NM_001008515	1002	1074.84	1135.85	1013.83	0.892573	-0.163958	0.187724	0.600424
chr6	+	119708425	119754191	6	Esrrb	NM_001008516	1302	0.346801	0.27745	0.416152	1.49992	0.584882	0.95762	1
chr9	+	49573658	49584328	4	RGD1310553	NM_001008517	3433	200.597	195.196	205.998	1.05534	0.0777052	0.583273	0.973411
chr3	+	121310710	121314264	5	MGC105649	NM_001008518	1152	6.98797	6.46137	7.51458	1.163	0.217852	0.620854	0.991724
chr6	-	7919927	8001949	38	Lrpprc	NM_001008519	4310	1565.16	1705.66	1424.67	0.835263	-0.259697	0.0251845	0.187922
chr6	-	36603421	36608410	9	Abhd1	NM_001008520	1364	546.116	431.729	660.503	1.5299	0.613439	0.0001157	0.00361582
chr7	-	135495108	135507004	9	Twf1	NM_001008521	2875	40.7524	38.7428	42.7621	1.10374	0.142403	0.443347	0.884928
chr9	+	64973841	65072436	35	Aox3l1	NM_001008522	4250	14.7925	14.629	14.9559	1.02234	0.0318757	0.925707	1
chr9	+	64906927	64964045	35	Aox4	NM_001008523	4878	0.459304	0.271196	0.647412	2.38725	1.25535	0.706116	1
chr5	-	159017523	159020850	3	C1qc	NM_001008524	1029	694.406	716.916	671.897	0.937204	-0.0935643	0.486113	0.908642
chr7	-	12488475	12495748	8	Ndufs7	NM_001008525	723	605.766	684.064	527.469	0.771082	-0.375044	0.00248269	0.0370091
chr6	+	144231087	144234735	2	Bag5	NM_001008526	2006	141.336	142.232	140.44	0.987402	-0.0182912	0.900249	1
chr9	+	64810459	64896031	36	Aox3	NM_001008527	4726	2858.84	2187.3	3530.38	1.61404	0.690674	0.00110334	0.0204102
chr19	+	52891898	52905966	9	Dhodh	NM_001008553	1529	95.9222	97.4226	94.4219	0.9692	-0.0451341	0.849111	1
chr14	+	23058671	23097346	10	Tmprss11g	NM_001008554	2698	0	0	0	NA	NA	NA	NA
chr14	-	37575343	37580564	3	Slc10a4	NM_001008555	1314	0	0	0	NA	NA	NA	NA
chr17	-	17663711	17701633	13	Ippk	NM_001008556	1470	35.35	33.5929	37.107	1.10461	0.143535	0.544512	0.948215
chr1	-	72663632	72683869	5	Zfp667	NM_001008557	3384	17.66	22.4561	12.8639	0.572847	-0.803779	0.0730879	0.365357
chr1	+	124119140	124120740	1	Ndn	NM_001008558	1600	1.93437	2.29833	1.57042	0.683289	-0.549432	0.699876	1
chr1	-	141796055	141803912	4	Hapln3	NM_001008559	1322	1.07807	0.649675	1.50646	2.31879	1.21337	0.75266	1
chr8	+	93934401	93951103	2	Prss35	NM_001008560	3132	0.401518	0.179134	0.623903	3.48289	1.80028	0.958546	1
chr15	-	31797572	31801127	3	Rnase9	NM_001008561	1260	0.135598	0.271196	0	0	#NAME?	1	1
chr4	+	207494654	207554220	6	Lmcd1	NM_001008562	1663	29.6674	29.8594	29.4753	0.987136	-0.0186796	0.833652	1
chr1	-	102141918	102151178	7	Rcn3	NM_001008694	1418	41.9984	39.761	44.2359	1.11254	0.153862	0.505206	0.922081
chr5	+	141245110	141249674	9	Ebna1bp2	NM_001008721	2218	0	0	0	NA	NA	NA	NA
chr19	+	65037337	65053996	8	Irf8	NM_001008722	1275	53.048	46.9449	59.151	1.26001	0.333433	0.20843	0.635384
chr2	+	201412181	201428141	7	Fga	NM_001008724	2389	2258.39	2646.99	1869.79	0.706384	-0.501476	0.154783	0.549662
chr2	+	63332283	63361404	15	Il6st	NM_001008725	7454	3980.76	3961.94	3999.58	1.0095	0.0136422	0.987446	1
chr10	-	87934149	87937029	8	Ka11	NM_001008750	1476	0.457162	0.358268	0.556057	1.55207	0.634194	1	1
chr10	-	87910657	87914716	8	Krt14	NM_001008751	1458	69.4251	97.2625	41.5877	0.427582	-1.22573	0.049648	0.292169
chr10	-	87942673	87945393	8	Krt16	NM_001008752	1392	2.97312	3.95967	1.98657	0.501702	-0.995098	0.489367	0.910437
chr10	-	87187795	87203807	8	Krt23	NM_001008753	1269	24.1196	10.2349	38.0043	3.71319	1.89266	1.34285e-08	1.45006e-06
chr10	-	87732924	87749163	8	Krt33a	NM_001008757	1215	0	0	0	NA	NA	NA	NA
chr10	-	87736680	87740372	9	Krt34	NM_001008758	1176	0	0	0	NA	NA	NA	NA
chr10	-	87809277	87812643	7	Krt36	NM_001008759	1407	0	0	0	NA	NA	NA	NA
chr10	-	87071825	87081926	7	Krt28	NM_001008760	1152	0	0	0	NA	NA	NA	NA
chr10	-	87124673	87131666	8	Krt12	NM_001008761	1371	0	0	0	NA	NA	NA	NA
chr11	-	64285569	64350871	27	Slc9a10	NM_001008762	3720	0.0895669	0.179134	0	0	#NAME?	1	1
chr14	+	36954230	36976506	4	Lrrc66	NM_001008763	2598	0.135598	0.271196	0	0	#NAME?	1	1
chr1	-	90170908	90172105	4	Psenen	NM_001008764	534	475.771	545.871	405.67	0.743161	-0.428254	0.00116974	0.021312
chr10	+	43424596	43432495	4	Igtp	NM_001008765	2102	626.35	507.546	745.155	1.46815	0.554003	2.92641e-06	0.000153026
chr3	-	126196995	126202542	7	Ciao1	NM_001008766	1430	173.918	181.753	166.083	0.913784	-0.130075	0.425681	0.869964
chr2	+	218170101	218173902	8	Txnip	NM_001008767	2742	1313.44	866.894	1759.99	2.03023	1.02164	1.81447e-05	0.000765072
chr7	+	2415105	2430938	13	Prim1	NM_001008768	1458	52.8598	56.1406	49.579	0.883121	-0.179317	0.427768	0.87168
chr2	+	104317819	104339571	6	Cmbl	NM_001008770	1131	2066.56	2055.29	2077.82	1.01096	0.0157239	0.937487	1
chr2	+	227841798	227851772	10	Wdr77	NM_001008771	4062	0	0	0	NA	NA	NA	NA
chr5	-	22419594	22446480	5	Impad1	NM_001008772	12794	0.37996	0	0.75992	Inf	Inf	0.412266	0.861098
chr18	+	40240996	40252356	3	Eif1a	NM_001008773	1830	555.914	462.898	648.929	1.40188	0.487368	0.0445404	0.272871
chr17	-	24806009	24837335	3	Tmem170b	NM_001008774	941	29.7378	20.6375	38.838	1.88191	0.912199	0.000904403	0.0178224
chr1	+	90172228	90174276	9	U2af1l4	NM_001008775	703	61.4333	69.2749	53.5917	0.773609	-0.370324	0.100926	0.435922
chr6	-	136865777	136871721	5	Serpina11	NM_001008776	1482	4.90666	6.58284	3.23049	0.490745	-1.02696	0.165151	0.567092
chr7	-	141245845	141251072	9	Krt1	NM_001008802	2404	19.3643	34.1277	4.60094	0.134815	-2.89094	0.0231927	0.178267
chr7	-	140996764	141006621	9	Krt82	NM_001008803	1482	0	0	0	NA	NA	NA	NA
chr10	-	87092252	87096248	7	Krt10	NM_001008804	1581	62.8615	78.8981	46.825	0.593487	-0.752711	0.000605862	0.0131488
chr7	-	141286687	141294636	9	Krt76	NM_001008805	1746	0.802462	0.450329	1.15459	2.56389	1.35833	0.561584	0.957372
chr7	-	141315718	141321166	9	Krt4	NM_001008806	1614	2.20888	2.5865	1.83126	0.708007	-0.498165	0.504663	0.921745
chr7	-	141259821	141271225	9	Krt77	NM_001008807	1563	1.0308	0.741737	1.31986	1.77942	0.83141	0.94162	1
chr7	-	141198446	141206471	9	Krt73	NM_001008808	1665	0	0	0	NA	NA	NA	NA
chr7	-	141180800	141190972	9	Krt72	NM_001008809	1665	0	0	0	NA	NA	NA	NA
chr7	+	140922817	140929091	9	Krt86	NM_001008810	1557	0	0	0	NA	NA	NA	NA
chr7	-	140961784	140968249	8	Krt85	NM_001008811	1419	0	0	0	NA	NA	NA	NA
chr7	-	140982316	140988077	8	Krt84	NM_001008812	1677	0	0	0	NA	NA	NA	NA
chr7	-	140935550	140942066	10	Kb23	NM_001008813	1671	0	0	0	NA	NA	NA	NA
chr7	-	140908542	140913443	9	Krt81	NM_001008814	1629	0	0	0	NA	NA	NA	NA
chr7	-	140796566	140816784	9	Krt80	NM_001008815	1359	0.841764	1.01293	0.670596	0.662034	-0.595023	1	1
chr10	-	87958995	87966157	8	Krt42	NM_001008816	1359	0.117635	0.235271	0	0	#NAME?	1	1
chr10	-	87745724	87749163	7	Krt31	NM_001008817	1245	0	0	0	NA	NA	NA	NA
chr10	-	87787318	87792744	7	Krt32	NM_001008818	1368	0	0	0	NA	NA	NA	NA
chr10	-	87745809	87749163	7	Krt33b	NM_001008819	1156	0	0	0	NA	NA	NA	NA
chr10	-	87798388	87801786	7	Krt35	NM_001008820	1368	0	0	0	NA	NA	NA	NA
chr10	-	87249904	87255869	7	Krt40	NM_001008821	1296	0	0	0	NA	NA	NA	NA
chr10	-	87020967	87028244	8	Krt25	NM_001008822	1341	0	0	0	NA	NA	NA	NA
chr10	-	87035440	87044093	7	Krt26	NM_001008823	1293	0	0	0	NA	NA	NA	NA
chr10	-	87051954	87057238	8	Krt27	NM_001008824	1350	0	0	0	NA	NA	NA	NA
chr7	-	141009310	141017951	9	Kb15	NM_001008825	1599	0.135598	0.271196	0	0	#NAME?	1	1
chr20	+	5287622	5295623	8	RT1-T24-4	NM_001008826	1654	0.219668	0	0.439336	Inf	Inf	0.655376	1
chr20	+	7474638	7478156	8	RT1-A1	NM_001008827	1566	74.0905	79.8151	68.3659	0.856552	-0.223386	0.153135	0.54823
chr7	-	141019965	141028601	9	Krt75	NM_001008828	1725	0.463611	0	0.927221	Inf	Inf	0.387217	0.841452
chr20	+	7433458	7436984	8	RT1-A2	NM_001008829	1560	71.3651	61.4323	81.298	1.32337	0.404222	0.0464899	0.279782
chr20	-	5857953	5878729	8	RT1-A3	NM_001008830	968	75.4149	72.7273	78.1025	1.07391	0.102871	0.516314	0.93034
chr20	-	6146270	6150864	5	RT1-Ba	NM_001008831	1119	654.508	623.37	685.646	1.0999	0.137376	0.521468	0.93437
chr20	-	6718704	6872656	8	RT1-CE1	NM_001008832	1191	0	0	0	NA	NA	NA	NA
chr20	-	155838	158856	7	RT1-CE10	NM_001008833	1114	68.3143	65.7879	70.8408	1.07681	0.106759	0.519568	0.932807
chr20	-	6775878	6779286	8	RT1-CE11	NM_001008834	1078	0	0	0	NA	NA	NA	NA
chr20	-	6718906	6872656	7	RT1-CE12	NM_001008835	1111	0	0	0	NA	NA	NA	NA
chr20_AABR06110665_random	-	0	613	2	RT1-CE13	NM_001008836	427	0	0	0	NA	NA	NA	NA
chr20	-	6755415	6872379	10	RT1-CE14	NM_001008837	2044	0	0	0	NA	NA	NA	NA
chr20	-	4805695	5073876	7	RT1-CE15	NM_001008838	1097	5.40349	5.51429	5.29268	0.959813	-0.059175	0.757496	1
chr20	-	5857675	5876456	7	RT1-CE16	NM_001008839	1019	378.511	368.879	388.143	1.05222	0.0734421	0.606872	0.985191
chr20	-	6852359	6855286	7	RT1-CE2	NM_001008840	1093	4.3141	5.00335	3.62484	0.724482	-0.464978	0.542582	0.94659
chr20	-	7008108	7011516	8	RT1-CE3	NM_001008841	1167	14.3471	13.4287	15.2656	1.13679	0.184964	0.631397	0.995514
chr20	-	6994666	6997483	7	RT1-CE4	NM_001008842	1117	11.9587	10.388	13.5294	1.30241	0.381188	0.292287	0.752651
chr20	-	6968845	6973135	8	RT1-CE5	NM_001008843	1593	0	0	0	NA	NA	NA	NA
chr20	-	6776338	6779286	7	RT1-CE7	NM_001008845	1103	0.395664	0.235271	0.556057	2.36348	1.24091	0.958456	1
chr20	+	6099930	6105533	6	RT1-DOb	NM_001008846	819	1.85642	2.44153	1.27131	0.520703	-0.941467	0.468608	0.89852
chr20	-	6207781	6212754	5	RT1-Da	NM_001008847	1192	725.093	689.318	760.867	1.1038	0.142475	0.445841	0.886252
chr20	+	5955098	5960408	4	RT1-Ha	NM_001008848	1678	0	0	0	NA	NA	NA	NA
chr20	-	4438940	4441142	5	RT1-M1-2	NM_001008849	1026	0.135598	0.271196	0	0	#NAME?	1	1
chr20	-	4419458	4421679	5	RT1-M1-4	NM_001008850	1026	0	0	0	NA	NA	NA	NA
chr20	+	4514213	4516334	5	RT1-M10-1	NM_001008851	915	0	0	0	NA	NA	NA	NA
chr20	+	4098255	4101172	6	RT1-M6-1	NM_001008852	993	0	0	0	NA	NA	NA	NA
chr20	+	4113594	4116511	6	RT1-M6-2	NM_001008853	999	0.311951	0	0.623903	Inf	Inf	0.618415	0.990429
chr20	+	5245093	5248485	8	RT1-N2	NM_001008854	1390	0	0	0	NA	NA	NA	NA
chr20	+	5265250	5269111	8	RT1-N3	NM_001008855	1804	19.6168	16.4329	22.8007	1.3875	0.472489	0.286974	0.744538
chr20	+	5258700	5261105	5	RT1-O1	NM_001008856	546	0	0	0	NA	NA	NA	NA
chr20	+	5253817	5255239	5	RT1-S2	NM_001008857	531	0.337303	0.235271	0.439336	1.86736	0.901002	0.957438	1
chr20	+	5367480	5380689	6	RT1-T24-1	NM_001008858	1059	3.21909	3.5029	2.93527	0.837955	-0.255056	0.806897	1
chr9	-	14558417	14572144	6	Mrps10	NM_001008859	508	22.4667	23.397	21.5363	0.920473	-0.119553	0.8202	1
chrX	-	2481250	2497422	21	Usp11	NM_001008861	3399	34.161	34.2521	34.0699	0.994681	-0.00769466	0.915163	1
chr7	+	2697334	2714080	24	Pan2	NM_001008862	3618	298.23	296.999	299.461	1.00829	0.0119111	0.934653	1
chr15	+	8226915	8291196	20	Usp54	NM_001008863	5738	67.8072	61.5473	74.0672	1.20342	0.267139	0.252174	0.700676
chr8	+	118451035	118456674	6	Prss45	NM_001008864	993	0	0	0	NA	NA	NA	NA
chr8	+	118464793	118471679	4	Prss46	NM_001008865	750	0	0	0	NA	NA	NA	NA
chr3	-	166766122	166766472	2	Wfdc12	NM_001008866	237	0	0	0	NA	NA	NA	NA
chr3	+	167249153	167256308	4	Wfdc6b	NM_001008867	549	0	0	0	NA	NA	NA	NA
chr3	-	167290330	167292581	2	Wfdc9	NM_001008868	225	0	0	0	NA	NA	NA	NA
chr3	-	166776185	166776556	2	Wfdc15a	NM_001008869	235	0	0	0	NA	NA	NA	NA
chr14	+	33038332	33044841	4	Spink2	NM_001008870	1021	0	0	0	NA	NA	NA	NA
chr5	+	61770344	61781920	3	Spink4	NM_001008871	228	0	0	0	NA	NA	NA	NA
chr3	-	166921183	166922634	3	Slpil2	NM_001008872	393	6.1383	7.55861	4.71798	0.624186	-0.679951	0.325671	0.787324
chr3	-	166956772	166958192	3	Slpil3	NM_001008873	393	0	0	0	NA	NA	NA	NA
chr2	+	55179916	55191826	5	Spink6	NM_001008874	954	0	0	0	NA	NA	NA	NA
chr2	+	55126831	55129753	4	Spink14	NM_001008875	594	0	0	0	NA	NA	NA	NA
chr10	+	3214337	3327889	19	Rsl1d1	NM_001008876	3136	3.57054	2.28708	4.854	2.12235	1.08567	0.295816	0.756508
chr7	-	75692430	75715911	7	LOC362901	NM_001008877	978	0	0	0	NA	NA	NA	NA
chr7	-	101766568	101787337	4	LOC362921	NM_001008878	412	0	0	0	NA	NA	NA	NA
chr5	-	54851038	54931298	8	Zfp292	NM_001008879	9965	268.486	284.01	252.963	0.890682	-0.167018	0.41792	0.865557
chr8	+	48067554	48082728	5	Scn4b	NM_001008880	4272	0.27745	0.5549	0	0	#NAME?	0.707588	1
chr3	+	167365259	167366887	2	Spint5p	NM_001008881	504	0	0	0	NA	NA	NA	NA
chr9	-	9731077	9750175	18	Uhrf1	NM_001008882	2530	5.22536	3.6788	6.77192	1.8408	0.88033	0.25759	0.706736
chr20	+	6167758	6177328	6	RT1-Db1	NM_001008884	1272	419.777	397.384	442.17	1.1127	0.154064	0.400149	0.853376
chr20	-	5898746	5902081	7	Slc39a7	NM_001008885	2252	45.7799	38.3834	53.1764	1.3854	0.470305	0.0694708	0.353874
chr20	+	5274289	5278991	8	RT1-S3	NM_001008886	2682	961.598	835.884	1087.31	1.30079	0.379391	0.00130938	0.0229993
chr13	-	32336214	32341680	5	Serpinb3	NM_001008887	981	0	0	0	NA	NA	NA	NA
chr17	+	36991587	36995865	2	Uqcrfs1	NM_001008888	1087	1568.78	1644.91	1492.64	0.907431	-0.14014	0.213214	0.643238
chr13	+	52529959	52531677	2	Yod1	NM_001008889	912	36.5136	27.9271	45.1001	1.61493	0.691467	0.0112762	0.109788
chr1	-	175167530	175168811	3	Hbe1	NM_001008890	444	0.811237	0.790171	0.832304	1.05332	0.0749456	0.939884	1
[truncated: 15,907 more rows]
