# Supplementary material for: Genes involved in the induction of liver growth by peroxisome proliferators
Source: Royal Society of Chemistry journal article supplement (doi:10.1039/c3tx50110h), 2014-01-01
Supplement: c3tx50110h3.xlsx [file c3tx50110h3.xlsx]

## Sheet: Counts_all_samples_Partek
Sample ID	DB_10_TH3_2-1-1	DB_11_TH3_3-2-1	DB_12_TH3_4-3-1	DB_60_CH3_1-4-1	DB_61_CH3_2-5-1	DB_62_CH3_3-6-1	DB_63_CH3_4-7-1	DB_9_TH3_1-8-1
Number of Alignments	23160868	20636221	18698530	25970188	18682894	17233871	21029009	13623208
Attribute	T_Group	T_Group	T_Group	C_Group	C_Group	C_Group	C_Group	T_Group
A1bg	14	14	11	79	14	2	28	0
A1cf	1239	1055	853	1030	870	641	953	808
A1i3	111704	86422	79760	83383	60157	62995	88797	64567
A2m	429	358	252	263	258	260	303	274
A3galt2	3	11	5	3	6	8	8	4
A4galt	0	1	0	1	0	1	0	1
AA926063	11	12	16	8	10	9	13	3
Aaas	82	73	58	91	36	66	44	41
Aacs	44	33	13	79	36	48	41	30
Aadac	847	637	623	1037	690	456	899	469
Aadacl2	0	1	1	1	2	0	0	0
Aadacl3	0	0	0	0	1	0	0	0
Aadat	3018	2646	2315	3338	2191	1637	2371	1951
Aagab	107	88	65	106	55	74	56	68
Aak1	103	106	74	68	57	59	69	72
Aamdc	98	102	67	120	94	127	104	36
Aamp	1411.26	1359.56	1125.51	1830.42	1174.5	1271	1226.91	763.456
Aanat	0	1	0	5	0	1	0	0
Aar2	221	214	133	292	157	168	178	122
Aard	0	0	1	0	0	0	1	2
Aars	3659	3213	2742	3795	2771	2956	2746	2354
Aars2	122	95	85	187	79	97	80	83
Aarsd1	152	123	102	209	109	148	147	70
Aasdhppt	312	328	262	447	304	273	372	225
Aass	5525	5526	4509	3001	3342	1949	2402	3529
Aatf	121	114	79	138	84	109	114	80
Aatk	23	29	21	38	23	25	16	16
Abat	1947	1328	1191	2063	1117	953	1511	1087
Abca1	1683	1325	939	1343	933	809	1208	1028
Abca13	6	7	9	7	11	7	7	4
Abca15	4	0	1	2	4	4	0	1
Abca17	22	20	11	18	10	9	12	8
Abca2	639	456	435	607	384	417	475	358
Abca4	30	19	27	16	9	15	18	11
Abca5	32	20	22	26	21	17	17	19
Abca7	26	38	25	39	24	26	29	20
Abcb10	226	221	158	285	169	121	184	154
Abcb11	9691	7474	6391	7634	7302	6195	6726	5532
Abcb1a	215	166	139	238	219	273	380	78
Abcb1b	145	105	78	84	106	128	100	56
Abcb4	2397	1931	1938	2033	1982	1878	2130	1329
Abcb6	609	485	455	789	398	487	501	332
Abcb7	351	296	258	319	226	181	264	204
Abcb8	218	197	154	330	134	137	189	138
Abcb9	55	46	37	64	26	10	41	10
Abcc1	31	36	20	27	15	25	15	17
Abcc10	159	138	117	220	109	104	121	96
Abcc12	4	1	1	2	0	1	3	1
Abcc2	7080	5115	4095	8304	4974	4669	7156	4934
Abcc3	51	55	29	47	28	41	41	21
Abcc4	61	61	62	59	42	42	40	49
Abcc5	93	117	74	105	72	78	88	68
Abcc6	7819	6227	5556	7504	4799	4330	5901	3457
Abcc8	57	54	57	102	30	39	45	21
Abcc9	221	208	206	246	144	125	253	139
Abcd1	723	564	392	749	311	351	522	358
Abcd2	20	21	15	69	27	32	37	14
Abcd3	7852	7154	6673	5101	3345	3095	3842	4508
Abcd4	80	66	49	109	56	57	93	33
Abce1	1156	1112	983	1108	814	811	826	815
Abcf1	663	661	498	355	457	564	388	411
Abcf2	520	486	350	574	319	395	363	262
Abcf3	590	524	425	675	467	467	507	322
Abcg1	139	145	119	128	93	105	134	88
Abcg2	43	44	33	95	25	47	41	34
Abcg3	756.829	625.013	455.515	682.183	450.646	385.906	428.456	444.966
Abcg3l1	106.616	57.8142	46.6789	83.165	62.1317	40.4391	61.584	46.791
Abcg3l2	126.852	70.6878	86.6018	119.865	68.8355	46.8398	92.1108	63.1734
Abcg3l3	98.1702	70.9872	60.4846	94.8167	50.3531	38.0937	59.5435	53.0343
Abcg3l4	4.53254	20.498	17.7193	6.96968	6.03281	2.72119	9.30517	7.03562
Abcg4	5	0	7	2	6	5	2	1
Abcg5	126	88	73	233	176	319	291	33
Abcg8	45	29	26	108	72	120	127	27
Abhd1	791.156	766.351	789.352	785.356	365.339	511.921	487.001	510.245
Abhd10	36	21	14	20	22	26	25	20
Abhd11	58	49	44	103	45	57	71	33
Abhd12	278	205	213	380	203	220	282	140
Abhd12b	1	1	0	2	0	0	0	0
Abhd13	497	476	422	527	354	414	477	407
Abhd14a	66	70	71	116	70	75	99	36
Abhd14b	4018	3219	3272	5107	3790	3723	4843	2301
Abhd15	441	489	339	247	143	167	205	285
Abhd16a	487	442	352	400	232	276	268	245
Abhd16b	3	3	2	0	0	0	1	0
Abhd2	5253	4001	2858	3487	2849	2186	3284	3286
Abhd3	3	5	2	3	10	5	5	0
Abhd4	568	526	450	790	425	370	495	319
Abhd5	418	348	245	411	218	222	337	374
Abhd6	508	414	432	643	305	341	414	292
Abhd8	29	25	25	56	32	33	51	15
Abi1	506	430	358	467	354	256	456	306
Abi2	41	41	43	45	41	19	50	35
Abi3	109	119	83	135	96	129	110	77
Abl1	401	366	307	466	305	310	311	222
Abl2	62	74	60	20	39	34	30	76
Ablim2	9	14	12	20	3	6	14	6
Ablim3	342	262	327	352	277	353	235	210
Abo	6	1	0	10	1	10	4	4
Abo2	0	0	0	0	1	1	0	3
Abol1	0	4	1	3	0	0	3	0
Abp1	1	1	1	4	1	4	1	0
Abr	139	131	113	104	63	57	81	84
Abracl	92	84	80	97	80	101	100	43
Abt1	118	126	89	161	105	125	116	79
Abtb1	474	370	299	588	330	317	437	203
Abtb2	828	643	550	933	473	444	563	449
Acaa1a	5310.93	4650.92	3858.95	5794.19	3408.65	3928.48	4314.16	2523.34
Acaa1b	5406.07	5517.06	3784.06	1378.81	1244.35	1064.66	1118.93	2547.66
Acaa2	8939	8536	8969	10999	6695	9821	8006	5120
Acaca	1714	1498	1119	1757	720	702	649	1318
Acacb	2125	1387	1221	2700	785	693	1137	1193
Acad10	1105	1017	909	1276	958	1045	1148	615
Acad11	3679	3125	3020	3557	2435	2390	2834	1907
Acad9	669	553	471	821	501	458	600	364
Acadl	4145	3757	3778	6102	3032	2936	3796	2353
Acadm	8643	7606	7444	9531	6927	6706	7954	5130
Acads	1837	1660	1504	2502	1414	1703	1710	981
Acadsb	439	310	319	517	356	355	430	265
Acadvl	3747	3344	3249	4619	2523	2992	3186	2162
Acan	4	1	4	4	6	8	6	3
Acap1	21	15	18	32	18	23	15	13
Acap2	190	157	115	164	88	87	100	100
Acap3	243	247	164	275	188	236	219	174
Acat1	4102	3751	3251	4202	2339	2837	2877	2335
Acat3	146	159	119	362	210	146	152	72
Acbd3	480	464	349	620	389	364	402	287
Acbd4	213	172	161	290	200	193	229	128
Acbd5	290	269	184	286	179	167	211	156
Acbd6	91	100	91	135	85	98	103	61
Acbd7	0	0	0	1	0	0	0	1
Accs	107	75	71	109	81	53	68	56
Accsl	0	0	1	2	1	1	0	0
Acd	187	143	154	231	128	160	163	96
Ace	4	4	2	3	4	12	4	4
Ace2	1	6	8	5	8	6	12	2
Ace3	1	2	0	0	1	0	1	3
Acer1	2	4	3	0	0	6	3	0
Acer2	259	372	307	419	454	474	278	251
Ache	25	21	24	32	21	18	31	27
Acin1	992	865	761	1091	715	729	807	561
Acly	3727.98	3189	1942.01	7571.01	1535	1607	1880	3136
Acmsd	305	190	187	259	299	182	165	207
Acn9	27	22	23	30	16	28	28	10
Acnat2	1658	1443	1580	2470	2458	2239	2853	1014
Aco1	2928	2465	2247	3312	2016	1861	2291	1512
Aco2	1564	1577	1331	2059	1081	1177	1475	929
Acot1	98	111	61	11	10	14	8	68
Acot11	9.73222	4.476	1	1.23062	2	2.64078	3.57513	1
Acot12	2097	1810	1678	1422	994	1003	1287	1175
Acot13	146	103	110	198	91	98	130	71
Acot2	1696	1700	1589	587	303	421	385	1062
Acot3	934	995	863	172	130	125	113	551
Acot4	1592	1509	1445	439	256	291	264	1140
Acot5	300	305	287	378	169	159	181	203
Acot7	624.998	528	518.001	504.001	325	320.001	352.001	313.001
Acot8	196	187.567	161.823	276.704	140	140	182	112
Acot9	38	53	27	52	48	33	58	29
Acox1	10631	8787	8256	4801	3120	3206	3539	5351
Acox2	8660	7265	6610	14626	8259	7084	10902	5143
Acox3	3520	2892	2418	3432	2165	1795	2562	2125
Acoxl	2	4	1	1	3	1	0	1
Acp1	84	94	93	134	63	94	99	60
Acp2	1796	1431	1308	2115	1135	1200	1549	994
Acp5	191	167	148	289.999	173	187	223	111
Acp6	255	216	203	321	209	217	203	143
Acpl2	155	119	109	219	114	96	158	61
Acpp	486	349	298.001	257	119	91	124	325
Acpt	11	6	4	0	1	6	4	2
Acr	0	0	0	1	1	0	1	1
Acrbp	10	14	21	20	15	21	15	15
Acrv1	0	0	0	1	1	1	1	1
Acsbg1	21	26	9	31	16	20	28	11
Acsbg2	1	0	1	3	2	0	1	0
Acsf2	1033	888	787	2277	936	798	1376	486
Acsl1	47820	38992	35555	36453	18741	17902	27872	26547
Acsl3	278	210	163	150	111	113	112	144
Acsl4	6080	5560	4884	5599	5186	4044	4580	4025
Acsl5	4091	3672	2980	6778	2682	2343	3271	2588
Acsl6	0	1	1	0	2	0	4	0
Acsm2a	163	137	153	555	434	365	615	68
Acsm3	388.227	221.775	266.882	543.537	502.648	426.788	648.618	234.604
Acsm4	1	4	0	2	5	4	2	1
Acsm5	911	861	828	1929	1499	1634	2237	380
Acss1	36	42	19	31	15	36	27	24
Acss2	849	644	594	1486	830	527	732	479
Acss3	1121	957	791	1026	867	629	875	725
Acta1	18	25	22	25	15	35	28	21
Acta2	42	45	57	86	41	114	38	36
Actb	9456	9458	7146	11380	5555	7406	6868	6237
Actbl2	13	4	6	7	5	3	4	1
Actc1	6	2	10	12	4	3	8	3
Actg1	1600	1758	1275	2505	1306	1370	1451	1065
Actg2	5	6	7	11	2	16	5	2
Actl11	2	2	2	1	3	1	1	0
Actl6a	165.115	175.005	136.179	140.832	103.978	102.222	125.446	91.3843
Actl6b	1	0	0	1	3	1	0	1
Actl7a	14	7	10	11	1	7	3	6
Actl7b	4	8	8	5	2	1	2	5
Actl9	1	1	0	1	0	1	0	0
Actl9b	0	0	0	2	1	0	0	2
Actn1	392	428	280	437	238	313	335	257
Actn2	5	5	2	10	4	7	9	3
Actn3	2	4	2	5	3	2	5	5
Actn4	3604.5	3112.99	2780.77	4942.02	2747.07	2725.76	3560.39	2007.49
Actr10	261	229	212	345	227	225	274	178
Actr1a	537	541	422	609	424	547	469	265
Actr1b	1072	936	743	1214	923	962	897	606
Actr2	479	378	294	431	266	318	350	246
Actr3	862	787	622	899	547	493	616	550
Actr3b	5	4	4	2	1	6	8	4
Actr5	70	51	51	66	47	62	57	29
Actr6	59	50	36	75	60	34	49	38
Actrt1	2	0	1	0	1	0	0	0
Actrt2	2	1	1	0	0	0	1	0
Actrt3	1	1	0	1	4	0	0	0
Acvr1	123	90	95	91	97	97	67	86
Acvr1b	160	138	132	164	104	115	125	82
Acvr1c	30	41	19	24	27	14	19	29
Acvr2a	226	171	135	149	111	132	151	131
Acvr2b	20	26	16	26	24	34	22	14
Acvrl1	60	73	59	75	61	65	56	57
Acy1	846	753	612	1344	600	673	840	530
Acy3	992	739	770	1093	807	941	1020	544
Acyp1	36	27	27	42	17	21	29	19
Acyp2	42	42	35	64	42	15	32	22
Ada	25	36	26	33	20	30	30	23
Adad1	1	0	0	1	0	2	2	0
Adam10	314	289	217	298	203	225	274	198
Adam11	40	42	27	17	14	24	25	13
Adam15	188	146	104	215	129	198	181	91
Adam17	297	275	238	326	221	219	280	192
Adam19	60	40	48	61	39	43	42	35
Adam1a	25	38	30	23	22	23	22	23
Adam2	1	0	2	4	1	0	3	1
Adam23	78	77	54	79	47	58	80	77
Adam26a	0	0	0	0	1	0	0	0
Adam26b	1	0	1	1	1	0	0	0
Adam28	16	24	26	43	37	30	50	13
Adam30	1	2	5	4	2	2	2	0
Adam32	2	1	0	1	0	2	0	0
Adam3a	1	0	1	1	1	1	0	2
Adam4	17	15	8	8	10	13	10	13
Adam4l1	12	12	6	6	8	17	8	1
Adam5	1	1	0	0	1	1	1	0
Adam6	0	1	2	0	2	0	0	0
Adam7	4	3	2	3	0	6	1	0
Adam9	394	340	301	406	298	301	385	284
Adamdec1	32	14	25	91	58	37	71	5
Adamts1	109	132	110	137	92	103	139	95
Adamts10	269	257	237	371	186	158	200	164
Adamts12	181	150	139	159	108	108	154	101
Adamts14	10	9	7	12	7	8	8	8
Adamts15	11	5	11	6	6	16	5	12
Adamts18	0	0	0	1	1	2	0	0
Adamts19	2	3	3	6	3	6	2	3
Adamts2	72	49	62	123	48	69	75	52
Adamts3	6	3	2	6	4	4	8	9
Adamts4	30	30	15	16	11	13	12	26
Adamts5	1	1	3	0	4	5	3	3
Adamts7	309	265	192	376	167	160	400	135
Adamts9	59	70	68	62	32	39	67	39
Adamtsl3	34	20	21	26	15	16	28	15
Adamtsl4	1192	1059	980	985	961	775	1001	545
Adamtsl5	7	9	8	5	3	6	6	1
Adap1	3	7	2	7	9	10	12	9
Adap2	340	351	235	338	272	214	258	226
Adar	600	496	312	460	274	318	286	338
Adarb1	174	160	114	151	100	112	137	108
Adarb2	1	1	1	2	1	0	1	0
Adat1	96	73	78	98	49	54	66	54
Adat2	35	27	36	59	43	32	34	26
Adat3	44	40	22	32	30	36	30	25
Adc	4	7	3	6	1	6	6	3
Adck1	86	78	53	70	56	43	45	45
Adck2	238	202	186	296	172	159	162	146
Adck3	5033	3741	3128	6641	3723	3135	5008	2361
Adck4	156	172	103	221	129	132	157	100
Adck5	784	668	532	955	578	582	558	474
Adcy1	398	342	398	299	615	422	260	205
Adcy10	144	144	191	125	96	77	204	104
Adcy2	3	1	0	2	2	3	5	2
Adcy3	25	39	38	35	30	29	35	24
Adcy4	95	118	70	93	53	68	72	60
Adcy5	104	84	71	103	71	47	64	73
Adcy6	1198	974	842	1050	717.002	848	954.002	546.002
Adcy7	37	24	25	34	20	25	20	21
Adcy8	5	0	2	5	3	4	2	3
Adcy9	73	62	38	70	35	34	63	32
Adcyap1	0	0	1	0	2	0	1	0
Adcyap1r1	146	113	123	132	95.9999	61	133	95
Add1	1037	864	766	1568	927	809	1289	571
Add2	15	12	3	15	5	6	27	6
Add3	95	95	70	127	78	85	92	73.9999
Adh1	12161	9009	9539	11521	7435	7234	9074	6393
Adh4	170	163	125	288	176	111	282	77
Adh5	1578	1406	1275	2395	1579	1350	1980	810
Adh6	5	2	4	4	1	1	6	1
Adh6a	0	2	0	2	0	1	0	0
Adh7	283	210	204	275	211	133	240	120
Adhfe1	3131	2356	2517	3051	2062	1965	2527	1720
Adi1	2033	1558	1662	2986	1764	1506	2100	1103
Adipoq	0	0	1	0	1	21	0	0
Adipor1	1089	977	874	1458	997	837	1050	727
Adipor2	1270	994	795	1182	563	571	717	876
Adk	5735	5255	4733	5921	4238	4050	4513	3506
Adm	24	18	17	13	8	15	31	10
Adm2	5	7	3	4	4	5	2	2
Adnp	1348	1112	1067	1293	841	814	1158	703
Adnp2	156	116	112	235	120	115	148	111
Ado	42	52	39	46	35	39	23	35
Adora1	39	21	23	31	13	16	35	18
Adora2a	62	66	53	87	65	49	87	36
Adora2b	4	5	3	6	3	3	2	2
Adora3	46	54	35	45	18	19	46	37
Adpgk	257	232	214	244	159	184	149	156
Adprh	87	84	72	126	89	100	82	59
Adprhl1	0	1	0	0	5	1	1	1
Adprhl2	238	203	146	284	196	183	168	107
Adprm	171	170	135	185	134	145	181	107
Adra1a	0	4	1	0	0	0	0	0
Adra1b	597	461	474	1043	559	483	765	277
Adra1d	2	2	1	1	0	5	0	0
Adra2a	4	1	1	2	0	1	1	3
Adra2b	133	111	78	138	102	105	138	94
Adra2c	0	0	0	4	1	0	0	0
Adrb1	4	11	5	10	1	2	4	4
Adrb2	15	25	11	32	22	14	22	9
Adrb3	0	0	2	1	4	0	1	0
Adrbk1	387	370	252	417	263	370	337	223
Adrbk2	19	22	5	10	10	6	13	6
Adrm1	922	883	725	1092	691	878	757	547
Adsl	292	285	244	382	228	256	246	180
Adss	1309	1159	943	1389	1019	788	1209	679
Adtrp	5914	5022	5204	5489	3966	3437	4731	3411
Aebp1	43	40	44	72	47	85	58	25
Aebp2	168	151	117	157	77	62	120	130
Aen	218	190	151	240	183	214	194	127
Aes	2686	2301	1942	4260	2176	2378	2657	1356
Afap1	4	5	5	4	3	5	2	8
Afap1l1	61	92	73	97	42	73	59	77
Aff1	473	362	307	405	308	326	303	308
Aff3	10	17	10	15	15	10	15	11
Aff4	998.35	939.7	796.367	818.035	810.195	716.972	851.388	661.537
Afg3l1	377	357	309	465	263	314	297	205
Afg3l2	682	711	534	817	464	534	525	438
Afm	24034	19881	17146	19485	16230	15307	18092	14458
Afmid	1598	1556	1288	2284	1087	1269	1306	1000
Afp	202	165	196	341	197	173	259	126
Aga	310	315	254	433	252	246	325	187
Agap1	121	105	82	146	77	103	128	92
Agap2	22	32	18	16	20	18	16	12
Agap3	268	239	212	272	200	244	197	147
Agbl4	0	1	0	1	2	0	0	0
Agbl5	49	34	28	59	32	20	45	26
Ager	9	5	1	5	3	6	5	5
Agfg1	198	232	167	210	160	176	198	142
Agfg2	553	470	389	831	588	579	661	284
Agk	96	75	70	162	70	69	84	52
Agl	682	622	484	854	501	524	729	487
Agmat	996	809	819	1481	1364	1096	1497	537
Agmo	3594	3189	2966	3932	3004	2705	2977	2224
Agpat1	81.7789	70	67.7582	89	63.7953	59.4088	71.3903	54.7491
Agpat2	1689.94	1500	1296.88	1907	1153	1006.9	1389	913.928
Agpat3	1248	1200	980	1539	911	1055	941	720
Agpat4	12	22	17	27	14	26	23	15
Agpat5	94	114	58	83	63	56	81	79
Agpat6	1786	1758	1451	1298	835	1016	1002	1345
Agpat9	48	77	60	22	27	33	16	23
Agphd1	236	145	142	290	137	111	264	107
Agps	65	46	26	32	34	29	33	49
Agr2	0	0	0	1	2	6	1	0
Agr3	1	1	1	0	0	0	0	0
Agrn	541	496	371	597	331	337	427	275
Agrp	0	0	0	1	0	0	0	1
Agt	21067	19366	16400	24952	16560	18393	18561	11327
Agtpbp1	27	31	25	30	24	27	19	12
Agtr1a	1666	1455	1328	1994	1434	846	1690	990
Agtr1b	29	27	22	38	20	12	31	17
Agtr2	0	1	2	1	1	0	1	0
Agtrap	157	145	123	197	92	116	120	103
Agxt	2926.99	2491.01	2323.01	2822.03	1886.98	1713.01	2504.98	1608.99
Agxt2	1977	1607	1418	2205	1517	1310	1693	1096
Agxt2l2	408.163	390.015	306.729	700.572	297.082	296.793	373.663	254.875
Ahctf1	737.985	614.991	543.985	678.976	588.953	552	679.984	501
Ahcy	10870	9360	9062	14852	10299	9674	10289	5960
Ahcyl1	1075	990	918	1241	805	798	945	681
Ahcyl2	168	162	101	154	111	134	125	117
Ahdc1	493	390	304	478	287	286	310	237
Ahi1	44	53	37	58	45	27	42	35
Ahnak	220	262	244	305	208	378	336	150
Ahr	291	226	234	738	412	370	622	156
Ahrr	6	2	6	2	1	2	2	2
Ahsa2	188.007	223.052	163.569	293.472	269.749	248.733	280.478	117.582
Ahsg	166812	133650	127066	250006	156733	151392	169386	92828
Ahsp	10	5	3	4	3	6	31	2
Aida	160	174	150	175	128	134	144	93
Aif1	265	367	195	309	227	244	309	162
Aif1l	4	3	6	5	6	1	0	3
Aifm1	1214	995	948	1669	951	941	1074	712
Aifm2	363	335	332	342	246	234	300	227
Aifm3	12	6	9	16	6	8	9	9
Aig1	120	110	121	92	64	79	88	63
Aimp1	156	227	152	222	146	191	198	142
Aimp2	124	126	120	132	98	114	119	74
Aip	255.649	225.892	179.897	328.872	193.876	198	190.839	108
Aipl1	0	1	0	0	1	0	1	0
Aire	1	0	0	2	0	0	0	0
Ajap1	0	1	4	1	0	3	1	1
Ajuba	123	71	80	128	68	74	73	69
Ak1	3	7	8	7	10	4	1	6
Ak2	1451	1499	1317	2202.01	1167	1364	1436	859.999
Ak3	808	697	639	1306	836	807	979	464
Ak4	702	649	402	767	385	425	406	443
Ak7	16	14	14	23	10	22	10	7
Ak8	0	1	0	1	1	0	1	2
Akap1	870	840	722	823	545	599	606	553
Akap10	119	113	90	124	76	92	94	61
Akap11	534	469	349	357	393	394	356	339
Akap12	60	72	33	54	41	53	41	30
Akap13	739	699	513	857	568	588	749	419
Akap14	0	1	0	2	1	0	1	1
Akap17a	447	425	321	484	377	371	365	219
Akap2	425	346	303	350	187	197	147	325
Akap3	5	4	3	1	3	0	4	3
Akap4	3	3	2	2	2	0	0	2
Akap5	10	5	5	8	6	7	15	5
Akap6	44	34	29	73	32	25	59	33
Akap7	27	18	22	29	16	11	26	14
Akap8	403	387	310	339	297	325	345	237
Akap8l	592	447	496	676	411	432	646	320
Akap9	808	774	718	862	646	577	716	627
Akip1	46	54	37	54	59	65	45	19
Akirin1	274	270	219	208	168	217	185	207
Akirin2	266	242	229	254	212	190	254	148
Akna	61	79	59	74	37	51	75	48
Aknad1	99.0001	53	68	121	66	44	74	37
Akp3	0	0	0	1	0	2	2	0
Akr1a1	2756	2633	2152	4813	2443	2871	3372	1677
Akr1b1	89	82	53	98	69	83	71	57
Akr1b10	3	3	2	10	2	9	2	1
Akr1b7	4	3	3	43	12	2	24	0
Akr1b8	13	12	11	28	16	37	12	13
Akr1c1	363	282	262	417	313	322	278	209
Akr1c12	1585	1334	1447	1825	1416	1410	2041	1016
Akr1c12l1	1061	845	890	1192	872	842	1194	674
Akr1c13	4363	3618	3821	5695	3574	3568	4779	2680
Akr1c14	12791	11120	10420	19879	16167	14629	19772	6933
Akr1c19	145	141	97	132	146	115	152	77
Akr1c2	8812	7769	7737	8612	9673	6665	8137	4813
Akr1c3	283	240	265	541	261	232	375	190
Akr1cl	126	114	112	195	108	150	135	92
Akr1d1	14370	10846	9320	23568	15148	10452	17654	7128
Akr1e2	698	663	654	1073	546	608	823	439
Akr7a2	1353	1099	960	2148	1082	1100	1244	634
Akr7a3	256	163	150	208	128	251	225	103
Akt1	538	516	411	568	373	424	410	340
Akt1s1	390	349	307	476	350	346	356	252
Akt2	819	668	607	1367	574	560	628	501
Akt3	13	4	7	11	10	9	9	6
Aktip	83	85	86	120	73	82	87	63
Alad	2569	2285	1991	4847	2335	2470	3436	1516
Alas1	2021	1976	1708	2262	670	578	1191	1146
Alas2	317	142	79	241	164	172	608	122
Alb	1254190	1022480	989133	1403940	1042360	1162090	1013370	714433
Alcam	717	656	462	805	622	451	611	444
Aldh16a1	620	569	432	847	530	552	685	313
Aldh18a1	18	15	6	18	19	16	23	11
Aldh1a1	847	943	813	1146	687	1092	853	322
Aldh1a2	8	2	8	8	4	12	14	5
Aldh1a3	34	23	24	25	28	34	37	26
Aldh1a7	5	1	1	5	2	6	0	2
Aldh1b1	359	194	179	335	95	94	133	117
Aldh1l1	3404	2651	1983	3233	1925	1756	2252	1486
Aldh1l2	1945	1821	1354	2569	1232	1197	1745	1021
Aldh2	16004	13649	10667	19184	12034	12801	12370	7436
Aldh3a1	1	0	1	0	1	2	4	1
Aldh3a2	10604	8996	8072	8987	4751	4359	7061	6225
Aldh3b1	18	28	15	28	10	6	23	16
Aldh4a1	11095	7864	6023	11494	6985	5793	7712	5161
Aldh6a1	13321.5	10357	9522.05	13994.3	10219.3	7967.92	11379.8	7472.03
Aldh7a1	6280	5152	4410	7151	4844	4118	5336	3310
Aldh8a1	3782	3090	2970	3359	2249	2729	2987	2184
Aldh9a1	4550	3661	3287	5435	2597	2458	3430	2739
Aldoa	673.002	789.006	545.998	906.995	555.998	641	740.002	423.002
Aldoart1	23	20	18	21	16	28	21	12
Aldob	30012	26836	25902	48941	25954	28296	31679	18739
Aldoc	8	4	3	6	8	5	6	5
Alg1	168.622	142.715	110.303	202.022	113.456	119.347	141.039	89.4797
Alg10	170	120	111	138	103	100	130	111
Alg11	492	461	373	495	418	439	496	306
Alg12	148	167	124	211	131	114	130	128
Alg13	125	114	106	205	118	99	126	70
Alg14	252	200	180	235	224	177	218	149
Alg2	322	292	172	210	125	137	152	208
Alg3	215	212	188	312.001	159	166	203	137
Alg5	290	228	202	346	247	249	271	190
Alg6	110	71	88	126	81	53	128	58
Alg8	110	95	98	146	91	84	101	67
Alg9	188	161	151	221	159	137	181	104
Alk	2	2	0	6	3	2	2	1
Alkbh1	181	141	141	161	136	127	138	105
Alkbh2	64	47	47	83	51	40	50	25
Alkbh3	289	225	203	389	214	214	271	175
Alkbh4	28	25	32	29	33	34	31	19
Alkbh5	506	436	327	502	345	306	366	342
Alkbh6	54	49	46	61	46	42	63	32
Alkbh7	104	64	49	131	82	57	81	37
Alkbh8	67	52	48	38	33	30	41	43
Allc	0	1	3	0	2	0	1	4
Alms1	149	137	107	118	112	87	139	81
Alox12	6	8	4	4	5	9	10	1
Alox12b	1	0	1	1	1	1	3	0
Alox12e	5	1	1	1	1	6	9	0
Alox15	52	32	20	47	30	40	229	30
Alox15b	0	1	0	0	0	2	0	0
Alox5	8	1	1	5	7	13	1	7
Alox5ap	21	28	12	23	11	21	33	12
Aloxe3	6	6	8	8	5	3	8	3
Alpi	3	1	1	0	1	1	1	1
Alpk3	8	3	3	7	2	3	2	3
Alpl	158	174	112	100	112	162	84	106
Als2	814	610	505	711	424	420	503	561
Als2cr11	0	1	0	4	2	0	0	1
Als2cr12	15	13	9	16	6	5	12	5
Als2cr8	39	29	30	35	27	21	23	18
Alx1	0	0	0	2	0	0	1	0
Alx3	3	0	0	0	0	0	0	0
Alx4	0	0	2	2	0	0	0	0
Amacr	5957	4758	4565	4971	5249	3823	5987	3381
Ambn	0	1	0	0	0	3	2	0
Ambp	45183	41276	38535	73170	41398	43861	46760	24636
Ambra1	454	327	302	445	279	275	317	306
Amd1	1108	1067	833	792	623	910	776	748
Amdhd1	1128	947	838	1099	689	364	774	530
Amdhd2	107	82	77	105	111	112	110	48
Amelx	2	0	0	2	0	0	1	3
Amh	3	2	2	4	0	1	1	1
Amhr2	27	7	9	2	17	7	8	13
Amigo1	39	51	35	39	30	48	39	29
Amigo2	89	75	55	78	70	62	77	46
Amigo3	25	26	20	18	18	21	15	17
Ammecr1l	1093	880	846	1486	1129	1042	1152	736
Amn	1	1	2	0	1	0	0	0
Amn1	50	43	44	62	43	33	40	27
Amotl2	772	640	641	1035	494	516	618	433
Ampd1	1	5	2	6	2	2	1	3
Ampd2	652	584	496	961	477	579	601	332
Ampd3	10	10	8	12	4	12	12	8
Amph	1	1	0	0	1	0	2	0
Amt	800	625	602	1071	584	598	792	435
Amtn	0	2	0	0	0	0	2	0
Amy1a	5031	4606	4694	7712	4963	5042	5354	2959
Amy2	139	141	122	191	164	120	152	102
Amz1	8	6	5	19	9	5	5	3
Amz2	356	284	244	391	282	268	323	179
Anapc1	318	305	201	365	182	210	236	203
Anapc10	32	27	17	39	24	14	21	11
Anapc11	304	231	212	437	317	343	401	156
Anapc13	262.908	215	199.708	561.779	197.64	252.898	274.872	125.943
Anapc15	90	62	63	132	91	75	89	49
Anapc2	468	427	349	642	372	388	439	248
Anapc4	220	199	159	216	174	155	205	124
Anapc5	1377	1285	1045	2163	1180	1183	1461	771
Anapc7	165	130	123	164	107	126	116	101
Ang	41	26	38	32	46	35	50	7
Ang1	2821	2447	2330	3473	3142	3268	3510	1493
Angel1	237	196	171	292	200	187	227	137
Angel2	412	376	282	453	312	256	362	265
Angpt1	4	8	5	7	5	5	13	9
Angpt2	8	10	13	12	6	11	8	5
Angpt4	2	3	0	3	0	6	1	0
Angptl1	6	14	6	7	6	2	9	4
Angptl2	195	163	120	230	114	160	188	103
Angptl3	3555	2947	2973	3933	2500	2404	2807	2389
Angptl4	7051	6209	5659	3849	2693	2486	1349	4222
Angptl6	286.541	207.591	186.585	370.671	219.908	203.081	229.055	137.449
Ank1	4	2	1	3	4	5	6	3
Ank3	77	81	65	87	67	59	78	49
Ankfy1	904	762	577	929	660	635	695	549
Ankh	1862	1747	1257	1403	741	819	867	1348
Ankhd1	737	671	578	856	530	488	760	496
Ankib1	343	308	246	332	232	215	248	207
Ankle2	406	263	224	253	200	218	212	217
Ankmy2	90	91	76	104	46	87	94	60
Ankra2	41	23	25	34	31	35	27	21
Ankrd1	4	10	3	15	6	7	8	11
Ankrd10	53	76	53	70	51	53	60	47
Ankrd12	146	149	104	139	163	170	154	74
Ankrd13a	976	1001	672	1139	679	795	758	565
Ankrd13c	473	363	316	492	301	230	361	281
Ankrd13d	7	6	2	6	6	3	8	3
Ankrd16	21	18	14	23	8	13	25	10
Ankrd17	1144	994	855	900	664	685	849	783
Ankrd2	0	0	0	0	0	1	0	0
Ankrd22	2	0	2	1	0	2	0	0
Ankrd23	13	10	4	11	6	4	8	6
Ankrd24	107	87	67	122	76	98	109	52
Ankrd27	1175	977	776	986	522	562	669	744
Ankrd29	2	1	1	2	0	0	3	1
Ankrd32	59	40	36	39	35	33	42	47
Ankrd33b	77	91	113	236	78	101	94	73
Ankrd34a	3	2	1	2	2	2	2	3
Ankrd34b	1	1	1	3	0	1	4	2
Ankrd34c	3	1	0	5	3	1	0	1
Ankrd37	6	11	17	8	11	16	6	7
Ankrd39	13	16	8	12	11	12	3	14
Ankrd40	522	469	366	564	384	396	396	338
Ankrd42	41	44	47	62	57	37	43	17
Ankrd44	325	304	252	384	229	190	242	148
Ankrd46	560	363	301	625	397	308	581	266
Ankrd49	190	150	126	198	188	163	164	117
Ankrd5	3	0	6	0	2	4	1	1
Ankrd50	177	148	129	152	130	125	124	116
Ankrd52	210	167	128	142	121	102	96	152
Ankrd54	79	62	64	99	73	73	78	39
Ankrd55	5	1	8	8	3	6	6	1
Ankrd6	6	2	3	4	8	6	3	1
Ankrd61	24	24	22	16	10	11	19	18
Ankrd65	0	0	2	0	2	1	1	2
Ankrd7	2	1	0	1	1	1	1	1
Ankrd9	70	73	59	76	45	59	40	45
Anks1a	276	278	205	336	206	205	238	174
Anks1b	0	1	3	3	0	2	3	0
Anks3	94	88	64	113	73	71	83	57
Anks4b	680	476	411	708	572	557	861	320
Anks6	8	13	8	9	5	9	13	2
Ankzf1	362	333	279	346	229	255	274	194
Ano1	26	18	22	23	20	24	28	15
Ano4	3	4	4	4	0	2	1	0
Ano6	263	276	231	388	227	202	304	144
Ano7	0	0	0	3	1	1	1	1
Anp32a	837	794	660	1308	649	632	912	538
Anp32b	449	458	398	462	332	384	422	283
Anp32e	166	160	121	178	104	144	130	108
Anpep	2624	1835	1807	3100	1479	1573	2336	1389
Antxr1	16	14	20	35	12	15	17	19
Anxa1	35	72	38	60	58	183	100	30
Anxa10	1	0	0	2	1	1	0	1
Anxa11	884	820	726	1379	697	760	858	494
Anxa13	11	14	16	18	9	34	13	9
Anxa2	58	65	60	102	60	216	103	34
Anxa3	538	652	345	576	389	428	524	322
Anxa4	336	294	258	407	289	364	332	189
Anxa5	133	127	125	205	89	104	132	72
Anxa6	1806	1408	1444	2588	1701	1559	2283	990
Anxa7	145	117	95	180	101	157	154	80
Anxa8	13	7	7	8	7	61	22	9
Aoah	6	8	5	9	6	3	7	9
Aoc2-ps1	18	29	27	23	13	10	7	22
Aoc3	21	21	34	23	22	53	33	18
Aox1	5074	3735	3456	4545	3307	3878	4216	2568
Aox3	5017	3841	2992	3030	2623	1555	2958	3520
Aox3l1	25	25	14	18	14	14	21	17
Aox4	3	1	1	1	1	4	2	3
Ap1ar	426	453	409	414	375	442	525	276
Ap1b1	912	801	594	1046	570	704	666	508
Ap1g1	725	544	448	479	375	321	385	510
Ap1m1	509	465	375	605	323	335	325	332
Ap1m2	5	2	5	4	5	6	1	2
Ap1s1	474	426	411	795	415	440	568	246
Ap1s2	42	34	33	59	34	31	43	21
Ap1s3	46	34	26	29	18	24	28	32
Ap2a1	784	697	559	869	460	511	541	483
Ap2a2	1536	1278	1062	1570	994	984	1078	947
Ap2b1	576	498	418	562	398	427	485	368
Ap2m1	1049	916	803	1452	880	908	1023	666
Ap2s1	557	493	441	698	485	531	591	264
Ap3b1	395	355	284	567	322	262	406	275
Ap3d1	1655	1634	1334	2140	1404	1283	1409	1083
Ap3m1	620	534	459	592	416	418	507	382
Ap3m2	11	22	10	32	20	11	17	10
Ap3s1	149	149	138	171	170	137	164	90
Ap3s2	272	225	182	452	203	258	276	129
Ap4b1	199	189	139	305	162	166	188	106
Ap4e1	58	59	48	50	38	38	47	30
Ap4m1	60	62	56	62	51	44	52	43
Ap4s1	111	100	71	155	111	89	124	59
Ap5m1	179	147	129	180	125	102	140	119
Ap5s1	63	47	36	72	39	29	22	30
Apaf1	120	91	65	86	72	61	84	73
Apba1	18	29	12	16	7	15	8	14
Apba2	5	0	3	9	4	2	8	0
Apba3	1152.33	980.112	741.534	1526.31	689.799	825.255	821.177	637.784
Apbb1	30	27	27	40	18	18	19	9
Apbb1ip	37	41	27	55	28	30	53	22
Apbb3	502	433	344	789	352	373	420	272
Apc	405	321	279	341	205	217	284	266
Apc2	20	17	10	25	12	13	16	17
Apcs	14446	13406	12439	19989	18848	13910	17929	7884
Apeh	710	597	551	1011	556	601	688	377
Apex1	170	163	134	167	96	153	110	103
Aph1a	957	734	644	1153	671	654	835	505
Aph1b	100	122	108	157	108	77	90	56
Api5	1590	1482	1133	1764	1251	1131	1385	1035
Apip	55	37	43	76	42	38	43	32
Apitd1	17	19	10	14	7	7	10	8
Aplf	45	43	35	31	34	42	41	21
Apln	9	13	10	10	2	6	4	4
Aplnr	2	2	5	0	3	2	6	1
Aplp1	79	90	80	120	90	130	105	52
Aplp2	5387.8	4656.99	4150.87	5784.64	3871.01	4354.19	4590.18	2965.99
Apmap	2525	2158	2004	2516	1378	1208	1581	1509
Apoa1	20351	20655	18881	43227	26677	31370	31099	12508
Apoa1bp	292	204	212	373	237	230	293	164
Apoa2	11590	9892	9484	13090	9449	12207	9542	5671
Apoa4	20206	22332	20265	23826	12311	12316	16125	11219
Apoa5	16612	13370	13804	24807	18440	17248	18882	9046
Apob	116855	94389	84908	106288	109702	78314	117678	71223
Apobec1	99	71	89	151	115	65	95	56
Apobec2	4	9	0	2	7	3	3	0
Apobec3b	4	5	5	11	11	4	4	4
Apobec4	0	0	0	2	0	1	1	0
Apobr	10	25	29	38	21	26	42	14
Apoc1	29719.9	29017.9	26314.8	35734.5	26295	27956.8	28782	15873.5
Apoc2	6397	6130	6088	8935	6209	6278	7327	3634
Apoc3	34789.4	32196.9	31138.5	41127.5	26064.5	30517	30832.4	19313.2
Apoc4	3022	2859	2448	5073	3758	3707	3989	1424
Apod	1	0	0	0	0	0	1	0
Apoe	143842	135816	122410	208004	127936	173714	152684	79767.3
Apof	4427	4179	3588	6761	3957	3702	4442	2588
Apoh	40042	34456	35359	51574	41913	38926	46057	25090
Apol3	1145	855	820	1249	714	559	820	630
Apol9a	995	883	673	533	235	376	263	584
Apold1	29	30	25	48	31	28	26	21
Apom	2186	2014	2177	4785	2499	3304	3023	1397
Apon	1798	1628	1464	2922	1628	1616	1661	1106
Apoo	83	61	75	130	73	53	77	41
Apool	247	201	196	355	213	162	246	141
Apopt1	227	184	215	381	223	271	344	121
App	792	833	703	1112	700	839	811	594
Appbp2	584	483	333	449	407	352	425	322
Appl2	229	184	171	280	194	171	202	128
Aprt	232	176	194	394	218	260	274	118
Aptx	53	38	37	61	39	55	44	59
Aqp1	167	172	136	215	150	251	192	88
Aqp11	247	184	151	238	146	120	185	136
Aqp12a	2	0	2	11	0	0	2	0
Aqp2	0	0	0	2	1	0	0	0
Aqp3	4	3	2	4	2	1	2	1
Aqp4	3	1	1	1	2	3	3	4
Aqp5	17	19	11	12	9	4	5	1
Aqp6	0	1	0	3	0	0	0	0
Aqp7	2	0	2	3	3	1	0	0
Aqp8	1579	1246	1037	2312	1451	1300	1686	796
Aqp9	2381	1894	1829	3767	2763	2124	3966	1115
Aqr	359	331	268	303	253	246	265	244
Ar	65	73	40	41	31	29	57	51
Araf	1232	1045	968.999	1685.99	899	868.001	1192	699
Arap2	64	72	57	92	58	65	82	45
Arc	2	2	3	4	5	5	2	0
Arcn1	3115	2752	2278	3279	2294	2088	2583	2154
Areg	0	0	0	3	1	2	0	1
Arf1	919	807	731	1230	623	769	857	633
Arf2	85	60	49	88	44	59	66	53
Arf3	952	861	763	1184	741	816	904	568
Arf4	1477	1356	1104	1560	1068	905	1169	970
Arf5	1835	1642	1471	2310	1334	1486	2027	967
Arf6	548	483	371	525	302	359	356	312
Arfgap1	482	426	354	571	324	363	395	277
Arfgap2	1689	1490	1287	2064	1146	1203	1424	981
Arfgap3	377	312	285	552	252	220	331	280
Arfgef2	645	579	445	620	392	424	496	388
Arfip1	169	177	117	148	83	112	122	135
Arfip2	288	277	263	308	189	247	228	189
Arfrp1	69	68	63	122	79	76	68	35
Arg1	11868	12210	11347	15880	11934	12533	11690	7505
Arg2	3	2	1	3	1	1	4	1
Arglu1	423	443	312	378	330	350	376	243
Arhgap1	434	390	344	494	339	325	377	251
Arhgap10	8	19	12	21	14	13	18	9
Arhgap11a	22	16	18	27	26	18	14	12
Arhgap12	659	504	458	742	575	420	764	372
Arhgap15	13	14	7	12	7	6	12	6
Arhgap17	235	187	164	211	148	144	184	132
Arhgap18	109	87	64	155	84	81	119	48
Arhgap20	2	1	2	2	5	2	5	4
Arhgap21	312	305	250	371	233	336	308	255
Arhgap22	6	13	3	13	14	12	16	6
Arhgap24	203	176	147	224	111	111	234	108
Arhgap25	69	99	63	102	54	61	76	51
Arhgap26	35	29	10	35	15	21	32	17
Arhgap27	34	48	37	39	19	28	28	22
Arhgap28	8	7	8	13	2	5	10	5
Arhgap29	893	680	566	830	689	652	918	576
Arhgap30	91	134	72	81	52	56	108	49
Arhgap31	52	83	62	66	38	56	48	61
Arhgap35	1634	1246	1110	1679	1110	1082	1384	1026
Arhgap39	67	75	42	96	59	50	60	58
Arhgap4	108	126	76	87	62	58	80	61
Arhgap5	482	399	301	311	269	228	319	337
Arhgap8	213	159	225	285	237	186	293	123
Arhgap9	81.9339	90.9882	69.848	104.995	86	71.9852	94	37
Arhgdia	1739	1711	1357	2496	1461	1780	1883	1066
Arhgdib	243	281	177	302	202	170	260	133
Arhgdig	2	2	0	1	0	0	0	1
Arhgef1	679	699	540	814	489	519	609	366
Arhgef11	467.234	391.723	328.456	559.632	282.947	301.674	351.103	257.52
Arhgef12	1259	1091	913	1035	842	734	864	774
Arhgef15	70	75	59	72	54	55	56	37
Arhgef18	495	447	333	522	284	292	328	284
Arhgef19	361	273	210	499	192	169	301	130
Arhgef2	205	190	176	227	96	115	152	111
Arhgef25	11	11	20	24	11	19	18	5
Arhgef28	7	2	5	2	2	9	5	0
Arhgef3	60	94	50	164	161	93	121	51
Arhgef37	124	87	69	83	35	25	61	54
Arhgef39	47	38	59	70	56	41	46	36
Arhgef40	228.38	171.854	165.37	231.313	165.649	170.863	229.547	120.706
Arhgef6	26	27	20	21	8	16	12	15
Arhgef7	458	431.999	328	623	345.999	337	427.002	298.999
Arhgef9	26	14	16	15	11	18	22	11
Arid1a	1214	1028	866	970	646	662	813	713
Arid3a	86	56	45	24	17	23	23	73
Arid3b	50	50	46	84	45	61	53	54
Arid3c	0	1	0	0	1	0	1	1
Arid4a	125	128	91	127	131	135	142	108
Arid4b	529	461	438	451	440	365	484	286
Arid5a	11	16	13	22	31	29	14	7
Arid5b	168	162	179	259	169	135	211	111
Arih1	922	839	652	953	713	654	773	606
Arih2	662	542	489	631	405	489	495	415
Arl1	565	480	424	676	458	371	525	404
Arl10	2	2	1	1	0	2	2	0
Arl11	29	32	22	50	48	43	39	12
Arl13a	7	3	4	7	5	1	6	1
Arl13b	56	47	35	58	56	40	60	31
Arl14ep	86	77	62	83	61	70	81	56
Arl2	136	107	90	194	114	143	112	68
Arl2bp	405	340	249	411	270	276	301	228
Arl3	113	116	135	176	159	134	204	73
Arl4a	82	91	98	201	141	112	139	53
Arl4d	40	30	23	40	31	62	44	29
Arl5a	304	259	237	288	215	143	238	194
Arl5b	213	192	199	229	191	190	283	135
Arl5c	7	10	1	4	5	1	3	4
Arl6	25	15	16	21	23	14	26	11
Arl6ip1	1825	1451	1432	1382	1068	1033	1140	1225
Arl6ip4	243	280	199	386	274	308	318	165
Arl6ip5	162	138	139	135	118	93	105	95
Arl6ip6	97	72	66	89	66	87	96	40
Arl8a	304	275	220	394	230	261	295	164
Arl8b	860	853	814	1167	875	845	1131	607
Armc1	486	507	382	517	393	326	375	353
Armc10	140	106	121	177	119	123	141	67
Armc12	1	1	0	0	0	1	0	0
Armc5	361	354	272	494	299	296	272	223
Armc6	34.7039	32.9169	18.4147	32.7619	20.3054	30	24	16.8722
Armc7	56	47	33	42	25	17	30	30
Armc8	227	235	197	201	151	125	166	151
Armc9	109	74	75	104	74	77	86	52
Armcx1	19	22	25	36	30	19	34	14
Armcx2	19	12	14	22	11	11	15	16
Armcx3	135	139	118	177	133	118	161	97
Armcx6	1	2	4	8	0	3	1	2
Arnt	462	383	321	408	240	172	299	249
Arnt2	6	0	5	7	2	1	2	1
Arntl	588	483	433	528	412	282	304	337
Arntl2	66	66	45	97	40	19	81	28
Arpc1a	694	570	522	1152	653	649	657	400
Arpc1b	486	553	371	689	442	489	530	258
Arpc2	1457	1267	1265	1984	1262	1245	1688	840
Arpc3	638	615	533	869	593	621	767	391
Arpc4	864	737	737	1024	643	697	696	546
Arpc5	555	532	483	585	450	420	462	317
Arpc5l	373	455	373	547	326	371	329	253
Arpp19	234	203	174	290	240	232	241	105
Arpp21	2	4	4	1	9	5	5	3
Arr3	2	2	3	3	0	2	2	2
Arrb1	29	45	24	20	10	13	26	25
Arrb2	111	128	91	142	98	85	143	50
Arrdc1	133	135	118	222	121	138	174	51
Arrdc2	62	49	24	73	43	42	48	31
Arrdc3	1048	794	443	1005	661	687	703	544
Arrdc4	35	26	19	12	6	7	11	20
Arrdc5	0	0	0	0	0	0	1	0
Arsa	433	402	354	492	245	340	431	200
Arsb	321	287	244	464	220	230	274	183
Arse	71	61	53	96	64	66	53	36
Arsg	16	4	3	18	11	13	6	7
Arsi	3	0	0	1	0	1	0	2
Arsj	0	0	0	0	2	1	1	1
Arsk	122	69	70	86	60	59	63	46
Art1	0	0	1	5.59013e-08	1	1	0	1
Art2	17	15	14	12	9	7	17	8
Art3	8	8	1	10	7	4	4	1
Art4	18	19	20	27	12	23	24	10
Art5	1	2	1.12374e-08	2	0	1.12374e-08	0	0
Artn	1	5	1	4	0	4	1	0
Arv1	125	112	106	156	81	99	92	70
Arvcf	355	361	246	386	251	282	369	206
Arx	1	1	1	1	1	2	3	2
As3mt	1949	1913	1911	2929	1948	1889	1921	1266
Asah1	345	342	269	403	296	264	370	229
Asah2	16	20	15	16	9	13	10	9
Asap1	112	119	86	167	83	75	112	70
Asb1	17	6	8	17	13	13	13	7
Asb10	1	0	3	3	0	2	3	1
Asb11	2	2	1	1	3	1	3	3
Asb12	0	0	0	1	1	2	1	0
Asb13	99	110	92	78	102	159	100	83
Asb14	0	7	1	1	3	3	1	0
Asb16	2	1	2	1	1	0	1	0
Asb17	1	1	1	0	0	0	1	0
Asb18	0	1	1	0	0	1	1	1
Asb2	2	5	3	6	3	4	5	2
Asb3	187	158	136	232	131	137	149	125
Asb4	1	0	0	0	0	1	0	0
Asb5	11	16	12	39	13	9	21	9
Asb6	141	145	99	179	99	135	133	100
Asb7	81	65	64	90	36	47	48	59
Asb8	452	373	349	551	291	334	365	289
Asb9	0	0	0	0	1	1	0	0
Ascc1	181	168	145	238	180	183	205	112
Ascc2	213	158	141	252	135	150	157	121
Ascl1	0	2	0	4	1	1	2	0
Ascl2	2	7	4	1	2	3	3	4
Ascl3	1	1	1	4	4	4	1	1
Asf1a	127	123	108	159	78	84	105	86
Asf1b	9	8	2	9	5	7	1	2
Asgr1	4285	3887	3948	5300	4716	4741	5112	2336
Asgr2	2882	2525	2373	4052	2485	2474	2917	1613
Ash1l	1031	841	775	851	708	635	761	612
Ash2l	237	189	195	260	160	162	177	134
Asic1	8	9	11	15	10	7	15	6
Asic2	10	4	4	3	2	5	4	2
Asic3	0	1	0	1	2	0	0	0
Asic4	2	0	2	1	0	4	3	1
Asic5	4	5	6	9	4	6	13	2
Asip	1	1	0	1	1	0	2	0
Asl	4291	4146	3856	5011	4743	4726	4418	2424
Asmt	1	5	2	3	1	0	2	2
Asmtl	183	190	157	235	193	214	198	116
Asna1	365	363	314	595	355	376	441	259
Asns	17	32	15	159	16	21	25	21
Asnsd1	284	285	211	256	212	202	219	188
Aspa	78	85	57	116	66	63	100	71
Aspdh	1128	976	904	1741	817	1026	1210	571
Aspg	2932	2880	2273	2113	1929	2022	1671	1595
Asphd2	1	1	3	0	2	0	0	1
Aspm	28	32	41	47	38	42	26	25
Aspn	6	6	3	8	6	12	3	9
Asrgl1	272	239	228	416	246	316	353	148
Ass1	25729	19886	20641	25692	15311	15145	15091	15080
Aste1	32	19	24	26	25.5913	26	31	20
Astl	2	1	1	0	0	0	2	0
Astn1	2	4	2	3	6	4	5	2
Astn2	26	26	21	44	14	16	20	9
Asun	204	202	174	247	163	172	211	136
Asz1	0	1	1	0	1	0	0	0
Atad1	723	710	558	663	517	494	564	443
Atad2	87	70	66	95	87	62	89	65
Atad3a	468	473	321	459	274	270	289	312
Atat1	28	32	23	45	26	24	27	18
Atcay	3	5	1	2	1	4	0	0
Ate1	114	108	78	131	101	70	98	91
Atf1	532	433	406	502	369	350	413	334
Atf2	280	210	151	275	178	151	185	175
Atf3	8	7	8	17	10	23	21	8
Atf4	1470	1315	1406	1645	1265	1365	1285	963
Atf5	7502	6785	5342	8503	4495	5252	5453	4078
Atf6	840	685	553	536	456	383	497	575
Atf6b	619	604	492	835	433	424	504	347
Atf7	139	102	100	161	74	92	90	73
Atf7ip2	4	1	2	2	2	0	1	0
Atg10	68	47	27	77	49	40	57	41
Atg12	696	606	537	748	540	504	620	396
Atg13	1022	857	780	1351	732	635	853	699
Atg14	233	161	168	268	204	193	215	115
Atg16l1	282	273	186	271	187	220	198	194
Atg16l2	36	41	43	76	62	61	54	24
Atg2a	975	767	641	906	586	586	601	507
Atg3	347	317	270	512	284	324	363	211
Atg4al1	119	115	83	147	98	106	121	80
Atg4b	234	201	170	306	158	193	208	121
Atg4c	207	210	213	311	236	211	317	161
Atg4d	352	335	295	400	287	319	309	203
Atg5	280	243	204	343	243	243	277	161
Atg7	120	100	89	171	85	106	103	88
Atg9a	1697	1373	1111	2080	1148	1078	1320	943
Atg9b	8	1	1	5	1	0	2	2
Atic	419	389	295	439	281	391	289	290
Atl1	23	17	10	22	13	14	27	16
Atl2	1369	1219	988	1393	1040	1119	1204	867
Atl3	892	731	556	730	515	475	657	531
Atm	269	209	147	187	143	130	201	156
Atmin	19	19	8	23	9	15	16	11
Atn1	456	356	359	506	266	341	323	260
Atoh1	2	0	1	3	1	1	0	0
Atoh8	239	235	233	338	201	223	309	120
Atox1	543	438	445	737	456	600	521	290
Atp10a	10	10	2	10	6	4	8	3
Atp11a	1277	1034	938	1083	738	741	865	837
Atp12a	0	1	2	3	1	1	1	1
Atp13a1	787	654	507	1052	553	572	612	440
Atp13a2	230	214	137	301	185	207	223	134
Atp13a3	25	17	19	24	24	14	10	16
Atp13a4	2	0	1	4	1	3	3	2
Atp13a5	29	26	29	61	20	24	36	16
Atp1a1	5343	4790	4142	8389	3837	4730	4859	3171
Atp1a2	5	6	6	5	4	12	8	0
Atp1a3	10	8	6	16	2	4	5	6
Atp1a4	2	0	2	5	2	1	6	0
Atp1b1	588.484	687.738	643.067	668.47	557.812	604.612	672.375	463.668
Atp1b2	12	16	4	13	8	11	11	9
Atp1b3	231	224	207	274	212	236	269	159
Atp1b4	15	15	11	9	11	6	8	4
Atp2a1	6	10	9	10	9	8	12	6
Atp2a2	3423.06	3050.03	2519	3389.99	2013.01	2055.98	2555.01	2143
Atp2a3	64	60	21	46	29	75	38	25
Atp2b1	557	503	369	504	417	433	455	304
Atp2b2	276	221	145	277	153	131	220	144
Atp2b3	3	4	0	8	1	1	3	3
Atp2b4	10	8	13	10	7	4	8	4
Atp2c1	1235	1172	1064	1253	973	821	1002	800
Atp2c2	2	1	2	3	1	1	4	0
Atp4a	1	5	2	0	3	3	2	2
Atp4b	2	0	0	0	0	1	0	0
Atp5a1	9046	6998	6424	11769	5852	6585	7513	5222
Atp5b	16354	13914	12460	24519	12772	12733	15102	9319
Atp5c1	3018	2702	2459	4354	2643	2526	3201	1747
Atp5d	1281	1049	928	2175	1185	1322	1429	640
Atp5e	942	781	835	1560	1112	1097	1203	513
Atp5f1	3489	2953	2877	4336	2948	2605	3605	2026
Atp5g1	1810	1854	1538	2865	1580	1834	2328	1086
Atp5g2	1256	993	859	1905	1095	1110	1179	619
Atp5g3	3158	2666	2346	6219	2870	2850	3439	1517
Atp5h	556	561	477	785	660	552	624	309
Atp5i	641	525	472	830	532	622	677	296
Atp5j	784	817	704	1206	791	615	959	476
Atp5j2	897	858	809	1140	1055	907	1149	568
Atp5l	1607	1381	1200	1989	1700	1311	1846	792
Atp5o	1581	1358	1457	2217	1603	1355	1920	937
Atp5s	80	50	62	82	50	49	74	36
Atp5sl	252	221	183	364	217	213	248	160
Atp6ap1	935	873	783	1048	748	804	919	562
Atp6ap1l	25	12	18	32	28	13	45	13
Atp6ap2	419	394	341	443	315	347	341	266
Atp6v0a1	1164	1021	896	1270	754	714	727	659
Atp6v0a2	242	192	156	198	115	146	115	195
Atp6v0a4	2	1	1	3	2	6	3	1
Atp6v0b	409	333	322	620	414	546	536	212
Atp6v0c	2753	2779	2374	3947	2496	2884	3133	1652
Atp6v0d1	2184	2140	1665	3104	1778	1744	2125	1322
Atp6v0d2	1	1	4	1	1	0	0	1
Atp6v0e1	662	604	582	923	783	876	911	410
Atp6v0e2	261	237	198	256	148	180	224	197
Atp6v1a	408	335	260	354	229	258	292	235
Atp6v1b1	3	0	2	1	3	1	0	2
Atp6v1b2	848	850	622	894	547	620	715	612
Atp6v1c1	286	246	236	367	297	279	356	181
Atp6v1c2	9	9	2	13	7	6	8	3
Atp6v1d	346	325	264	369	333	309	311	164
Atp6v1e1	386	348	322	463	315	299	341	223
Atp6v1e2	1	1	0	0	2	0	1	0
Atp6v1f	191	246	184	309	210	222	251	141
Atp6v1g1	1175	1074	1009	1693	1336	1277	1430	665
Atp6v1g2	1	1	1	0	0	1	2	1
Atp6v1g3	0	1	0	0	1	0	0	0
Atp6v1h	452	414	346	429	333	383	335	243
Atp7a	57	59	28	35	36	29	37	33
Atp7b	1097	810	657	1200	678	558	895	630
Atp8b1	253	217	171	242	168	148	240	221
Atp8b2	698	594	516	632	400	346	500	414
Atp9b	533	450	319	553	427	409	457	325
Atpaf1	293	226	227	383	199	206	274	199
Atpaf2	192	195	144	224	168	163	170	100
Atpbd4	60	46	41	42	47	30	47	28
Atpif1	183	182	157	272	244	235	301	94
Atraid	260	212	179	337	206	199	250	136
Atrip	33	27	20	38	14	23	33	28
Atrn	8484	7141	6093	6818	4156	3870	5035	5372
Atxn1	296	297	249	204	133	150	204	253
Atxn10	710	583	501	890	503	434	561	433
Atxn2l	900	847	737	1227	615	709	788	499
Atxn3	388	342	217	236	157	177	192	201
Atxn7l3b	1490	1248	1080	1660	968	913	1139	904
Auh	378	303	377	632	341	316	460	238
Aup1	1393	1353	1196	2371	1326	1440	1601	861
Aurka	51	51	37	45	57	36	34	21
Aurkaip1	400	385	362	558	310	403	412	251
Aurkb	15	14	7	15	9	6	4	2
Aurkc	16	8	11	26	12	17	16	7
Aven	162	110	109	232	156	141	139	87
Avil	23	18	17	10	6	18	14	22
Avp	0	0	0	0	1	0	0	0
Avpi1	118	157	110	201	97	105	123	107
Avpr1a	1439	1102	1032	2941	1706	1121	1755	652
Avpr1b	0	0	0	2	1	0	1	0
Avpr2	0	2	1	1	0	0	1	1
Awat1	0	1	0	1	1	3	2	0
Awat2	3	0	0	0	0	0	1	1
Axin1	390	337	261	491	330	381	326	229
Axin2	201	163	121	103	115	146	143	141
Axl	252	371	208	329.001	160	212	252.999	185
Azgp1	11305	9557	10081	14948	11842	11103	12727	6317
Azi1	113	112	80	120	63	95	104	51
Azi2	248	242	179	318	183	217	247	124
Azin1	842	885	600	767	708	597	536	529
B2m	24125	22656	19761	25413	19848	18949	23604	14397
B3galnt1	2	4	2	9	8	4	8	3
B3galnt2	295.909	262.189	243.233	321.549	274.442	236.15	282.809	201.338
B3galt1	365	268	333	872	535	566	696	221
B3galt2	11	12	15	7	12	8	6	6
B3galt4	66	49	55	94	62	69	59	55
B3galt5	10	8	4	7	2	6	8	2
B3galt6	48	46	42	57	38	45	37	35
B3gat1	1	1	0	1	0	0	1	0
B3gat2	3	6	0	2	2	4	0	2
B3gat3	529	504	397	647	479	536	509	317
B3gnt1	184	122	109	171	133	113	135	112
B3gnt2	123	126	100	131	149	128	124	107
B3gnt3	2	1	3	2	0	3	4	0
B3gnt4	0	3	0	0	1	1	0	2
B3gnt5	3	1	2	5	2	3	5	3
B3gnt6	0	0	1	1	2	0	1	2
B3gnt7	10	12	11	24	4	11	13	13
B3gnt8	8	1	5	6	3	6	5	2
B3gntl1	18	10	11	15	16	10	19	2
B4galnt1	838	716	760	1178	738	908	793	438
B4galnt3	4	1	4	0	0	1	2	2
B4galnt4	4	0	0	2	6	4	2	2
B4galt1	410	347	241	363	238	255	233	291
B4galt2	0	4	5	4	5	4	3	4
B4galt3	153	157	119	174	113	161	143	90
B4galt4	1	1	1	1	3	4	6	3
B4galt5	95	87	67	106	86	44	82	45
B4galt6	55	77	56	98	51	47	56	39
B4galt7	143	97	110	168	115	121	106	87
B9d1	15	20	22	27	28	29	19	11
B9d2	21	30	26	31	33	37	27	16
Baalc	0	0	1	1	0	2	0	2
Baat	15459	12098	12295	17267	13723	11289	16598	9196
Babam1	322	264	240	549	258	272	255	169
Bace1	229	186	163	221	141	124	168	126
Bace2	31	38	33	58	28	48	25	26
Bach1	453	438	341	547	396	474	464	320
Bad	99	67	77	86	54	85	65	40
Bag1	442	399	328	541	390	453	475	254
Bag2	26	21	21	27	11	21	20	7
Bag3	1046	898	779	756	490	574	535	578
Bag4	118.76	99.3206	105.418	142.726	110	83	101	73
Bag5	195	198	158	219	181	205	176	145
Bag6	1296	1189.01	910.002	1628.98	909.001	938.999	1026.99	704.002
Bai1	0	0	2	6	3	4	3	2
Bai2	2	4	2	4	5	6	4	1
Bai3	2	2	0	7	0	5	4	0
Baiap2	146	144	135	232	76	131	120	83
Baiap2l1	450	445	404	706	307	419	410	295
Baiap2l2	2	1	6	5	3	5	3	4
Bak1	48	69	53	77	34	44	37	23
Bambi	46	34	17	32	16	25	32	19
Banf1	264	247	245	477	244	300	313	176
Bank1	35	34	17	27	18	26	18	14
Banp	62	58	74	94	61	56	88	33
Bap1	506	462	363	707	407	378	465	317
Bard1	7	4	5	7	3	3	1	5
Barhl1	0	1	2	2	0	1	1	0
Barhl2	3	4	0	2	1	3	1	0
Barx1	2	0	1	0	2	0	2	0
Basp1	5	16	11	17	10	20	13	0
Batf	7	3	3	13	7	4	4	2
Batf3	7	13	11	14	8	8	18	3
Bax	132	88	106	185	121	150	95	54
Baz1a	246	275	216	117	148	226	172	171
Baz1b	887	780	654	738	428	527	628	481
Baz2a	648	584	385	451	335	343	360	364
Baz2b	251	211	170	191	165	139	177	161
Bbc3	84	76	48	161	130	146	133	47
Bbox1	1873	1550	1346	2169	1163	881	1395	1247
Bbs1	63	43	52	69	52	27	58	40
Bbs10	201	201	178	230	139	128	153	156
Bbs2	157	103	117	109	79	74	85	70
Bbs4	128	91	96	120	85	66	92	75
Bbs5	35	23	26	37	32	25	24	14
Bbs7	19	13	11	26	21	25	28	11
Bbx	51	46	29	31	26	15	24	27
Bc1	0	1	2	0	1	0	0	0
Bcam	82	56	40	114	81	121	78	45
Bcan	10	9	1	4	4	5	3	2
Bcap29	235	151	172	197	183	123	194	128
Bcap31	1412	1224	1178	2120	1338	1329	1613	764
Bcar1	2395	1614	1161	2223	949	1204	1430	1103
Bcar3	391	325	262	398	246	223	409	199
Bcas1	3	1	1	1	3	4	3	0
Bcas2	245	208	199	294	246	225	258	137
Bcas3	313	284	270	326	185	211	249	171
Bcat1	2	0	5	4	2	9	7	3
Bcat2	39	35	27	34	21	28	36	34
Bccip	338.27	306.263	251.387	430.514	316.877	266.69	310.956	160.96
Bcdin3d	57	51	44	60	21	49	34	25
Bche	69	38	21	75	22	23	35	29
Bckdha	1718	1301	1196	2406	1239	1384	1453	777
Bckdhb	1191	986	911	1564	797	788	914	707
Bckdk	386	314	257	512	203	258	239	256
Bcl10	182	171	151	266	200	210	191	106
Bcl11a	1	2	3	7	2	2	5	3
Bcl11b	1	4	3	2	3	5	4	1
Bcl2	3	5	3	2	9	1	4	1
Bcl2a1	32	40	23	36	35	29	42	25
Bcl2l1	201	210	157	324	247	305.999	286	127
Bcl2l10	2	1	1	0	0	0	0	0
Bcl2l11	11	18	10	13	7	8	10	6
Bcl2l12	54.0828	60	46.046	111	36	75.1387	62.0554	34.099
Bcl2l13	116	92	84	99	64	78	65	66
Bcl2l14	2	3	4	1	1	4	5	3
Bcl2l15	1	1	3	2	2	1	1	1
Bcl2l2	444	402	348	511	376	336	402	266
Bcl3	141	183	225	198	387	273	151	154
Bcl6	800	1362	916	275	98	75	332	301
Bcl6b	291	287	233	301	177	202	189	196
Bcl7b	217	196	159	322	180	213	184	138
Bcl7c	114	146	134	228	154	200	181	93
Bcl9l	1159	945	738	708	385	405	485	662
Bclaf1	734	637	553	642	530	496	559	441
Bcmo1	48	33	31	42	45	28	46	16
Bco2	456	316	281	492	229	244	318	231
Bcor	371	319	258	361	221	191	194	269
Bcorl1	119	130	80	103	86	96	90	62
Bcs1l	125	118	97	177	115	104	117	81
Bdh1	3829	2794	2704	4252	2160	2315	3180	1854
Bdh2	21	19	14	52	9	25	24	6
Bdkrb1	2	1	0	0	1	0	0	0
Bdkrb2	0	5	2	3	3	7	0	3
Bdnf	6	4	2	6	3	7	9	4
Bdp1	27	20	19	22	7	24	18	16
Becn1	628.437	618.8	501.027	864.144	524.524	552	610.618	378.446
Begain	8	1	0	5	1	3	3	4
Bend5	2	0	4	3	1	1	2	0
Bend6	0	1	2	3	4	2	1	1
Bend7	34	32	25	26	17	17	23	28
Best1	2	2	0	4	1	0	29	1
Best2	1	1	0	1	1	0	0	1
Best3	5	3	0	4	2	3	4	4
Bet1	623	540	565	735	531	364	658	431
Bet1l	315	269	184	271	213	238	195	165
Bex1	0	1	0	5	0	1	0	2
Bex2	0	1	0	8	1	1	0	0
Bfar	673.642	605.672	494.76	518.479	330.674	361.324	405.872	359.562
Bfsp1	5	2	2	2	4	3	9	1
Bglap	1	1	2	0	0	0	0	1
Bgn	1257	1247	1138	1390	1068	1022	1502	880
Bhlha15	74	57	56	32	19	24	25	102
Bhlhb9	45	38	35	53	38	38	46	33
Bhlhe22	4	7	5	6	3	4	3	3
Bhlhe23	0	1	0	1	0	1	0	0
Bhlhe40	512	281	285	840	279	466	473	396
Bhmt	68569	66005	59540	54385	30879	19982	31975	43509
Bhmt2	11302	9270	8025	11476	6928	5691	7901	6652
Bicc1	18	14	25	24	12	16	20	15
Bicd1	5	2	2	5	1	7	1	1
Bicd2	320	288	252	330.001	248	252	254	173
Bid	106	94	60	100	87	78	80	61
Bik	2	0	0	1	0	3	1	1
Bin1	128	123	108	213	109	124	141	84
Bin2	78	73	82	90	65	56	94	45
Bin2a	0	1	1	0	0	1	0	2
Bin3	261	235	203	292	211	206	250	148
Birc2	478	365	384	700	617	530	690	339
Birc3	124	90	77	118	97	91	103	66
Birc5	18	10	9	22	12	13	11	8
Birc6	2204	1882	1527	1453	1405	1222	1662	1314
Blcap	561	557	521	766	415	429	524	323
Bles03	288	223	189	378.001	219	251	226	130
Blk	42	39	30	26	19	18	23	21
Blmh	316	323	291	430	297	304	351	179
Blnk	3	6	10	11	1	3	4	2
Bloc1s1	354	351	279	703	436	445	595	245
Bloc1s2	155	124	139	142	125	107	140	83
Bloc1s4	149	125	94	146	90	108	103	104
Bloc1s5	140	107	98	197	129	124	141	72
Bloc1s6	179	142	120	290	128	123	146	116
Blvra	184	179	119	258	125	138	182	117
Blvrb	1342	1192	839	2181	1306	1426	1561	672
Blzf1	90	97	80	99	82	71	74	69
Bmf	680	490	430	634	406	301	501	381
Bmi1	157	133	112	135	76	107	122	88
Bmp1	2055	2039	1649	2453	1301	1117	1632	1212
Bmp10	28	24	27	18	18	11	17	22
Bmp15	0	3	2	1	2	0	0	0
Bmp2	54	85	33	68	68	33	46	46
Bmp3	1	3	0	1	0	0	0	1
Bmp4	6	11	6	8	4	14	6	0
Bmp5	100	128	96	141	91	100	127	83
Bmp6	10	21	20	14	9	17	14	11
Bmp7	35	20	19	12	19	36	14	4
Bmp8a	2	0	0	1	1	1	0	0
Bmper	13	13	12	12	13	5	10	11
Bmpr1a	171	128	96	123	102	89	105	100
Bmpr1b	2	1	1	2	0	1	1	0
Bmpr2	200	168	144	130	121	110	139	145
Bms1	400	329	254	375	254	290	270	266
Bmx	4	2	7	7	1	9	4	2
Bmyc	49	34	28	58	47	34	33	34
Bnc1	4	5	1	1	2	2	4	2
Bnc2	5	1	5	1	3	6	5	3
Bnip1	84	72	67	126	55	83	99	46
Bnip2	92	102	93	122	74	78	78	72
Bnip3	1254	1248	1155	1063	1027	837	907	847
Bnip3l	1309	1199	1127	1407	1244	1406	1553	744
Bnipl	2	3	2	3	2	7	6	5
Bod1	112	85	69	84	79	71	74	45
Bok	13	13	5	15	12	20	14	7
Bola1	211	186	170	302	198	261	221	121
Bola3	69	64	56	89	53	56	68	43
Boll	0	0	0	1	0	1	1	0
Bop1	383	395	250	361	226	249	200	259
Bora	25	29	22	33	20	18	23	19
Bpgm	187	128	108	199	115	127	294	116
Bphl	870	578	575	895	559	619	616	436
Bpi	1	1	0	0	1	1	0	2
Bpifa1	0	0	0	1	0	0	0	1
Bpifa2	1	0	0	1	2	1	2	0
Bpifa2f	0	0	0	0	1	0	0	1
Bpifa3	0	0	0	0	0	1	1	0
Bpifa5	0	0	0	1	0	0	0	0
Bpifb1	0	1	0	0	1	1	0	2
Bpifb2	0	3	2	1	0	1	2	0
Bpifb3	0	1	0	1	0	0	0	0
Bpifb4	2	0	4	2	1	2	1	0
Bpifc	2	2	2	1	0	3	2	1
Bpnt1	365	356	294	447	316	261	343	269
Brca1	77	55	21	46	49	25	38	13
Brca2	32	40	22	39	19	30	22	15
Brcc3	475	414	357	546	423	374	393	318
Brd1	342	361	291	334	263	277	269	215
Brd2	796	699	608	884	598	782	672	462
Brd3	759	627	420	517	295	346	366	435
Brd4	1347	1243	1101	1578	922	947	1134	866
Brd7	329	374	300	501	249	240	334	248
Brd8	232	219	185	293	168	197	214	120
Brd9	157	122	94	200	125	111	143	88
Bre	352	299	253	463	276	233	347	197
Brf1	203	201	160	198	132	183	164	133
Brf2	114	117	93	146	124	110	134	77
Bri3	608	541	603	911	581	718	765	392
Bri3bp	28	30	38	44	32	30	31	16
Brix1	155	127	129	127	119	93	107	141
Brk1	512	451	412	626	473	473	498	303
Brms1	313	319	281	475	348	413	347	189
Brms1l	90	67	78	79	56	71	85	59
Brox	335	298	252	379	228	268	335	202
Brpf1	207	187	173	187	139	166	140	134
Brpf3	253	173	129	189	131	177	139	118
Brs3	0	0	0	0	0	0	2	0
Brsk1	6	5	10	10	9	14	8	5
Bscl2	484	447	481	591	320	445	465	383
Bsdc1	1121	1058	923	1536	884	953	1017	649
Bsg	6936.97	5787.44	5591.18	9398.36	6919.77	6552.3	7396.49	3801.11
Bsn	14	5	10	11	10	5	18	5
Bsnd	3	0	4	1	3	4	2	2
Bspry	55	43	34	49	39	49	35	35
Bst1	7	9	3	1	7	3	8	4
Bst2	3215	3028	2442	5653	2059	2641	3034	1558
Bsx	0	0	1	0	0	0	1	1
Btaf1	493	482	399	356	289	304	321	393
Btbd1	755	680	584	661	513	449	568	444
Btbd10	32	35	19	31	17	26	26	40
Btbd16	6	2	1	4	2	1	3	0
Btbd17	1.80792e-19	0	0	1.5863	0	0	0	0
Btbd3	33	24	17	28	15	26	23	20
Btbd6	353	284	240	415	272	307	370	185
Btbd7	121	128	88	127	92	88	111	95
Btbd9	152	148	105	170	80	104	113	79
Btc	3	2	5	5	2	5	6	2
Btd	1118	920	839	1240	631	618	829	672
Btf3	566	488	484	878	514	520	550	315
Btg1	2310	2268	2623	3800	3461	3056	2720	1690
Btg2	240	176	200	199	267	254	171	147
Btg3	8	8	10	12	13	13	18	23
Btg4	0	0	0	1	1	0	1	0
Btk	20	25	11	18	12	14	17	9
Btla	0	2	2	0	0	0	3	2
Btn1a1	3	1	0	0	0	0	0	0
Btn3a2	0.185673	1	0.0928366	1.48257	1	0	2	0
Btnl2	1	0	0	0	0	1	0	0
Btnl3	0	2	0	0	0	0	2	0
Btnl5	1	2	0	0	0	1	1	2
Btnl7	2	0	0	1	2	1	1	2
Btnl8	1	0	0	1	1	1	0	0
Btrc	75	80	54	118	67	61	118	69
Bub1	36	16	20	39	29	19	9	11
Bub3	342	318	254	424	269	324	248	210
Bucs1	4912	3914	3776	5729	3688	3740	4537	2765
Bud13	85	74	74	147	83	96	97	52
Bud31	254.268	224.631	203.949	323.621	268.775	318.789	319.36	127.823
Bves	0	1	1	1	0	1	0	0
Bwk1	617	596	535	794	525	612	624	416
Bysl	142	156	110	149	73	125	78	123
Bzw1	774	669	593	772	553	668	582	486
Bzw2	95	87	56	79	73	71	53	68
C1H6orf35	167	138	113	246	139	140	187	77
C1d	73	82	75	99	77	54	69	60
C1galt1	298	243	175	223	196	153	182	215
C1galt1c1	181	232	160	233	231	181	272	109
C1qa	1310	1442	1063	1729	1236	1249	1458	811
C1qb	879	1112	715	1156	927	891	1058	489
C1qbp	472	456	429	731	385	370	426	278
C1qc	904	1018	712	1149	765	928	1047	601
C1ql1	2	1	0	0	0	0	0	0
C1ql2	0	0	0	0	0	1	1	1
C1ql3	1	1	1	0	0	2	0	0
C1ql4	1	0	1	1	2	1	1	1
C1qtnf1	84	109	63	157	88	90	105	51
C1qtnf2	8	7	13	12	5	6	7	5
C1qtnf3	12	7	12	6	9	7	11	1
C1qtnf4	2	0	2	0	1	1	0	0
C1qtnf5	37	25	28	42	27	34	40	13
C1qtnf6	13	12	10	25	18	13	13	6
C1qtnf7	3	6	5	6	7	7	8	2
C1qtnf9	1	3	1	0	0	2	1	2
C1r	16952	14070	12070	20215	13042	12135	17259	9318
C1rl	1002	753	692	1168	680	516	715	537
C1s	9311	7419	6229	8433	7390	6368	9499	4839
C2	3229	2815	2192	3589	2462	2589	2995	1733
C2cd2	581	477	376	585	411	337	516	389
C2cd2l	616	666	483	554	281	416	433	489
C2cd3	184	141	102	200	90	111	146	91
C2cd4c	3	0	4	5	0	4	4	1
C3	215787	180438	150917	231299	178361	158060	177369	113736
C3ar1	27	42	17	35	18	28	28	25
C4a	38838.3	32570.1	25146.8	39472.7	25736.9	20702.9	30961.1	20292.6
C4b	6926.05	5474.07	4091.97	5916.13	4080.38	3485.41	5118.95	3431.07
C4bpa	12626	10088	9205	15404	11739	10271	14510	6968
C4bpb	4881	4453	4680	8071	6178	5202	6530	2996
C5ar1	69	75	53	84	59	50	72	40
C6	6290	5825	4730	6521	3317	2833	3744	3869
C8a	16692	13803	12245	18771	14674	11972	16907	9478
C8b	7933	6755	6676	10804	7615	6297	8224	4519
C8g	3615	3151	3139	5705	3452	3346	4067	1929
C9	19163	16716	14344	25390	18959	16536	21113	10978
CB741658	4	3	1	2	2	2	3	1
Ca2	78	48	38	60	50	47	71	35
Caap1	65	55	71	60	51	39	49	48
Cab39	816	819	724	897	694	754	763	491
Cab39l	169	116	112	237	131	138	168	70
Cabin1	244	226	196	281	165	187	192	141
Cables1	52	36	19	43	40	38	45	27
Cabp1	91	70	72	70	45	83	79	57
Cabp4	3	3	2	3	3	4	2	1
Cabp5	2	3	1	2	2	1	0	0
Cabp7	50	44	40	90	56	53	66	39
Cabs1	0	0	2	2	0	1	0	0
Cabyr	20	23	11	18	16	7	11	2
Cacfd1	188	187	137	255	177	150	171	108
Cachd1	12	17	14	20	11	9	16	8
Cacna1a	7	5	5	14	7	8	5	4
Cacna1b	5	8	2	9	7	3	6	3
Cacna1c	6	7	5	7	5	4	13	2
Cacna1d	288	214	193	302	187	181	274	195
Cacna1e	4	2	2	5	1	1	3	4
Cacna1f	7	3	4	2	6	6	4	4
Cacna1g	17	16	7	14	11	8	8	3
Cacna1h	7.79823e-42	4	3	5	4.65877	4	4	4
Cacna1i	3	1	0	4	2	2	4	2
Cacna1s	2	1	2	4	0	1	2	3
Cacna2d1	9	7	12	15	10	4	8	0
Cacna2d2	10	7	5	6	5	7	2	2
Cacna2d3	5	2	3	1	0	1	2	2
Cacna2d4	113	111	130	85	41	24	57	92
Cacnb1	5	3	2	2	2	2	1	3
Cacnb2	20	13	13	36	14	25	40	11
Cacnb3	8	12	9	14	14	12	21	10
Cacnb4	11	16	9	22	8	8	8	11
Cacng1	0	0	0	1	0	0	1	1
Cacng2	0	0	1	1	0	0	0	0
Cacng3	0	0	0	0	0	0	1	0
Cacng4	2	3	3	2	0	0	0	1
Cacng5	1	0	0	0	0	0	0	0
Cacng6	0	1	0	0	1	1	0	0
Cacng8	1	1	0	2	0	0	0	0
Cactin	197	172	150	253	150	162	177	126
Cacul1	606	573	476	644	466	509	530	420
Cacybp	472	410	406	662	491	488	490	284
Cad	436	368	261	456	241	306	244	274
Cadm1	316	273	261	326	186	257	225	187
Cadm2	0	2	0	0	0	1	0	1
Cadm3	13	12	18	28	14	12	11	16
Cadm4	22	16	15	26	11	16	19	10
Cadps	7	1	7	6	6	4	9	5
Cage1	18	16	11	25	14	11	21	11
Calb1	12	32	14	5	6	1	2	9
Calb2	1	0	1	0	2	1	1	2
Calca	0	0	0	0	0	0	1	1
Calcb	2	0	2	0	0	0	1	0
Calcoco1	439	370	349	584	323	328	368	196
Calcr	1	2	1	1	0	2	0	0
Calcrl	102	90	51	82	52	59	56	73
Cald1	2778	2195	1905	2963	2013	1786	2265	1705
Calhm1	1	0	0	0	0	1	0	0
Calhm2	29	30	19	29	26	31	37	25
Calhm3	0	0	0	0	1	0	1	0
Calm1	1653	1683	1418	2760	1606	1567	2062	1025
Calm2	893	813	709	1364	838	749	939	523
Calm3	272	206	183	288	230	251	255	171
Calml3	1	1	5	2	2	11	10	1
Calml4	21	27	27	44	18	37	26	24
Caln1	4	4	3	4	3	4	2	1
Calr	12641	12199	9505	22800	11962	10085	16330	7289
Calr3	26	24	20	36	21	29	26	14
Calu	1894	1728.99	1426.02	2494	1620	1550.02	1947	1279.99
Caly	2	0	2	0	0	0	2	0
Camk1	370	289	342	480	389	443	423	225
Camk1d	261	244	214	345	234	181	252	189
Camk1g	1	1	1	1	2	3	0	2
Camk2a	3	0	1	1	0	0	0	1
Camk2b	6	6	7	2	4	4	3	4
Camk2d	38	42	27	29	18	26	24	26
Camk2g	27	22	9	36	15	13	19	17
Camk2n1	41	36	46	58	57	49	82	19
Camk2n2	8	11	1	4	2	4	4	6
Camk4	2	1	2	4	3	2	3	0
Camkk1	29	32	13	22	27	18	25	12
Camkk2	23	21	16	35	12	10	9	16
Camkmt	6	13	10	11	7	10	7	9
Camkv	3	0	2	2	1	3	1	0
Camlg	86	64	59	83	65	60	82	46
Camp	1	0	1	1	1	0	1	0
Camsap1	212	210	145	168	128	155	145	147
Camsap2	291	322	238	334	260	241	278	205
Camsap3	248	189	195	292	138	192	154	120
Camta1	38	31	21	48	36	27	27	15
Camta2	468	426	347	555	301	311	384	281
Cand1	912	782	666	799	617	635	750	569
Cand2	3	5	5	8	8	8	8	1
Cant1	418	415	338	562	397	402	457	283
Canx	8037	7674	7198	11526	8284	7125	10083	5027
Cap1	1394	1352	1072	1674	1117	1017	1247	947
Cap2	2	1	1	0	1	0	1	0
Capg	86	126	70	105	75	92	100	47
Capn1	228	240	186	279	137	205	204	129
Capn10	84	83	58	107	59	73	78	72
Capn11	0	1	1	2	0	2	2	0
Capn12	6.4971	11.0156	12.2256	8.96454	7.92785	2.23995	6.60724	6.50808
Capn13	3	1	3	0	3	1	0	2
Capn2	269	263	266	336	285	227	294	194
Capn3	3	4	2	1	4	1	3	1
Capn5	12	19	9	30	16	21	9	11
Capn6	5	3	2	3	2	2	2	1
Capn7	340	276	251	341	243	213	262	213
Capn8	1	1	0	0	0	1	1	0
Capn9	1	2	0	2	0	0	1	1
Capns1	268	189	200	303	168	216	237	137
Capns2	7	2	2	1	0	3	2	0
Caprin1	2796	2512	2137	2295	1402	1245	1942	1635
Caps2	22	18	15	39	24	11	21	13
Capsl	2	1	0	0	0	0	0	0
Capza1	600	590	471.77	612.764	408.749	398.72	560.788	474.577
Capza2	1416	1287	1218	1758	1316	1064	1414	802
Capza3	0	0	1	0	2	0	0	0
Capzb	847	802	753	1295	691	792	901	504
Car1	8	6	7	16	12	6	9	9
Car11	1	1	3	2	5	7	4	0
Car12	2	1	2	5	0	1	0	1
Car13	1	1	2	1	4	5	3	0
Car14	351	248	251	561	258	268	341	203
Car15	1	0	0	1	2	0	0	1
Car3	12221	9509	7965	23241	7080	7986	11526	10045
Car4	0	0	1	0	1	0	0	1
Car5a	586	438	466	752	437	371	645	285
Car5b	31	17	20	35	21	28	23	14
Car6	17	11	22	39	28	19	34	18
Car7	28	29	29	59	9	25	28	14
Car8	466	427	348	834	471	560	564	296
Car9	6	4	9	5	4	7	13	1
Card10	250	220	178	269	235	304	234	115
Card6	610	426	402	628	397	315	500	350
Card9	25	22	24	25	23	19	25	19
Carhsp1	1776	1337	1349	2848	1632	1511	2122	902
Carkd	507	444	381	749	434	471	458	280
Carm1	418.43	318.451	268.314	378.712	220.592	286.944	295.54	248.656
Cars	344	336	267	450	236	301	259	215
Cars2	343	299	252	517	197	169	276	210
Cartpt	0	0	1	0	2	1	0	0
Casc1	9	9	7	9	13	8	14	7
Casc3	227	174	145	184	127	143	121	140
Casc4	8	13	8	12	15	2	7	4
Casc5	18	17	10	16	16	17	10	8
Cask	77	57	49	73	55	48	54	61
Caskin1	17	17	11	8	12	13	14	16
Caskin2	371	324	243	352	202	226	229	201
Casp1	73	64	47	73	62	67	59	48
Casp12	197	150	139	134	152	153	115	143
Casp14	0	1	0	1	1	2	0	0
Casp2	95	97	57	89	84	75	107	47
Casp3	477	440	390	553	461	372	541	369
Casp4	145	144	124	200	40	72	83	110
Casp6	266	179	183	331	230	272.001	252	114
Casp7	391	285	286	490	272	254	347	209
Casp8	92	72	64	124	73	61	84	39
Casp8ap2	120	145	104	132	99	103	130	101
Casp9	102	80	74	114	66	72	81	58
Casq1	12	8	10	8	4	14	11	7
Casq2	1	1	2	0	1	6	0	0
Casr	8	2	3	11	4	1	8	2
Cass4	4	1	3	4	5	2	2	0
Cast	1590.99	1442.01	1245	1894.99	1541.01	1070	1741.98	900.005
Cat	30111	28955	27600	25548	20121	24440	35631	17187
Catsper2	15	20	17	35	21	22	33	12
Catsper3	0	1	0	1	0	0	1	0
Catsperd	3	8	3	5	3	5	9	3
Catsperg1	40	34	32	57	23	27	38	20
Cav1	38	33	40	53	50	102	135	38
Cav2	88	74	64	103	79	134	124	60
Cav3	0	0	1	3	0	3	1	0
Cb707485	0	0	0	0	1	0	0	0
Cbfa2t2	102	77	61	88	62	70	63	58
Cbfa2t3	18	35	24	44	15	23	25	15
Cbfb	318	281	243	321	272	212	243	183
Cblb	218	154	164	159	114	126	142	114
Cblc	9	2	9	8	4	16	10	1
Cbll1	227	165	139	195	174	134	149	137
Cbln1	1	1	0	3	2	0	2	1
Cbln2	2	1	0	0	1	0	3	2
Cbln3	495	476	325	584	280	269	349	291
Cbln4	1	0	0	2	1	2	0	2
Cbp	24	17	16	17	14	7	21	15
Cbr1	38	50	40	61	32	48	59	22
Cbr3	6	6	6	9	13	8	2	1
Cbr4	239	217	218	387	245	149	291	148
Cbs	5715	5164	4172	6383	4440	4361	4154	3407
Cbwd1	47	29	26	63	31	27	33	18
Cbx2	95	100	66	167	93	85	126	50
Cbx3	69	62	70	156	105	81	101	44
Cbx5	108	89	89	101	84	95	86	84
Cbx6	106	67	82	129	73	87	126	54
Cbx7	73	75	62	77	59	55	76	41
Cbx8	56	52	32	77	42	63	61	24
Cby1	33	20	24	47	34	31	37	17
Cc2d1a	266	246	206	352	186	216	185	152
Cc2d1b	283	256	229	354	243	291	229	156
Ccar1	267	284	230	303	260	226	244	157
Ccbl1	507	461	362	602	337	410	410	262
Ccbp2	113	91	56	37	38	27	32	50
Ccdc101	189	153	144	247	159	195	170	97
Ccdc102a	21	20	27	17	24	27	15	17
Ccdc103	2	0	0	0	0	2	1	2
Ccdc104	156	178	144	205	149	140	146	90
Ccdc105	1	0	0	0	0	0	0	0
Ccdc112	44	35	40	37	34	42	36	34
Ccdc114	0	2	3	3	1	4	6	0
Ccdc115	49.1362	61.4676	34.2435	64.3964	35	40.3696	41	39
Ccdc116	3	0	1	1	1	1	0	1
Ccdc117	142	174	141	168	143	159	180	117
Ccdc12	143	126	100	186	112	121	129	66
Ccdc120	37	18	24	24	17	29	36	16
Ccdc124	271	252	192	482	319	337	280	143
Ccdc125	169	158	123	202	139	168	123	112
Ccdc126	112	154	100	242	135	71	215	104
Ccdc127	125	91	85	93	64	74	82	57
Ccdc129	0	2	1	1	2	3	0	3
Ccdc130	78	82	67	111	51	85	61	54
Ccdc132	268	233	167	293	220	166	249	130
Ccdc134	65	60	38	85	41	48	46	32
Ccdc135	0	0	0	3	0	0	1	1
Ccdc146	14.3767	14.6367	12.0702	25.3505	48.0684	15.6529	34.307	9.39313
Ccdc148	2	8	3	9	1	11	9	2
Ccdc150	8	7	5	5	4	4	1	4
Ccdc152	34	41	34	59	47	35	64	18
Ccdc153	0	1	0	3	1	2	3	0
Ccdc163	14	30	15	25	29	22	27	17
Ccdc164	1	2	5	1	2	1	2	0
Ccdc166	1	0	1	3	1	0	1	1
Ccdc167	75	69	57	105	66	61	86	39
Ccdc169	2	2	1	0	1	0	0	0
Ccdc17	97	90	66	138	74	80	105	52
Ccdc172	1	0	0	0	0	2	0	1
Ccdc173	6	3	7	6	3	2	3	2
Ccdc174	58	47	49	63	52	64	54	43
Ccdc175	4	11	4	10	5	7	10	0
Ccdc176	52.4609	35.96	34.9492	57.708	39.7288	36.089	53.2068	32.9654
Ccdc19	4	6	5	8	2	6	3	4
Ccdc22	188.372	162.184	152.697	246.535	161.661	196.163	192.124	108.393
Ccdc23	28	26	12	27	28	33	34	11
Ccdc24	4	0	0	2	1	1	4	0
Ccdc25	241	245	190	241	174	177	212	179
Ccdc27	1	4	2	5	3	1	4	0
Ccdc28a	138	115	115	206	115	133	139	59
Ccdc28b	66	57	47	51	80	81	79	32
Ccdc32	101	88	63	123	58	53	78	46
Ccdc33	3	2	3	1	0	1	1	0
Ccdc34	17	8	14	23	18	17	21	5
Ccdc39	95	85	70	50	62	63	73	60
Ccdc40	3	7	3	3	3	1	7	4
Ccdc41	91	103	126	171	97	98	100	84
Ccdc42	0	2	1	0	2	0	1	0
Ccdc43	156	132	121	172	155	107	151	82
Ccdc47	1536	1394	1203	1657	1172	1162	1434	987
Ccdc48	5	4	2	1	2	4	2	0
Ccdc50	83	80	50	72	65	45	88	62
Ccdc51	96	97	79	137	83	96	70	68
Ccdc53	253	221	230	364	267	239	328	141
Ccdc58	152	138	120	225	134	128	156	78
Ccdc59	95.855	93.6961	73.0207	87.1633	74	100.723	90.3777	58.4408
Ccdc60	1	1	1	0	0	1	2	0
Ccdc61	44	33	50	59	32	30	37	22
Ccdc62	48	47	39	38	23	30	38	22
Ccdc63	1	3	4	0	1	2	1	0
Ccdc64	52	62	39	72	49	62	48	20
Ccdc64b	5	3	3	3	5	10	8	0
Ccdc65	2	6	8	1	4	2	2	0
Ccdc67	4	3	2	6	4	0	3	2
Ccdc68	3	1	4	4	6	0	4	1
Ccdc69	4	1	3	1	2	2	4	2
Ccdc7	1	0	1	1	3	2	0	1
Ccdc71	97	86	86	123	65	77	105	66
Ccdc75	53	54	51	83	52	70	51	45
Ccdc77	27	23	17	59	41	21	29	15
Ccdc8	4	6	3	6	2	4	2	0
Ccdc80	613	670	533	824	593	661	845	534
Ccdc81	0	2	2	6	2	1	2	3
Ccdc82	44	35	36	62	40	29	58	20
Ccdc85a	0	3	0	0	1	3	1	1
Ccdc86	90	115	46	57	58	69	60	73
Ccdc87	0	1	1	1	3	3	2	1
Ccdc89	1	0	0	1	0	0	0	0
Ccdc90b	90	81	61	119	87	73	88	50
Ccdc91	288	256	253	361	198	237	314	191
Ccdc92	11	7	6	9	5	10	6	2
Ccdc93	94	93	66	83	73	64	72	40
Ccdc94	123	104	65	156	124	112	104	70
Ccdc97	297	279	194	318	183	200	196	175
Ccer1	0	0	1	0	0	2	4	0
Ccin	0	1	0	0	1	1	0	1
Cck	0	0	0	2	1	2	0	1
Cckar	0	0	0	1	2	0	0	0
Cckbr	1	2	1	1	0	0	1	2
Ccl1	2	0	0	0	3	1	0	0
Ccl12	2	0	2	1	5	0	2	0
Ccl17	1	0	1	0	0	2	1	0
Ccl19	14	19	12	18	14	11	15	5
Ccl2	3	8	4	2	10	9	16	4
Ccl20	1	1	0	1	0	1	0	0
Ccl21	51	37	37	53	63	116	53	26
Ccl22	5	6	0	6	0	1	2	1
Ccl24	57	57	58	96	101	62	114	38
Ccl25	1	2	0	7	1	0	0	0
Ccl26	1	1	1	3	1	2	0	2
Ccl27	12	7	16	26	8	13	17	5
Ccl28	2	0	1	1	4	2	1	1
Ccl3	12	13	14	20	17	17	31	8
Ccl4	7	8	4	10	1	10	11	6
Ccl5	76	102	69	126	80	74	86	52
Ccl6	575	774	449	585	408	337	514	381
Ccl7	1	1	3	1	1	6	0	1
Ccl9	7052	5964	5596	10020	6462	5218	8266	3796
Ccm2	470	487	411	683	462	508	491	332
Ccna1	3	0	0	1	1	2	2	0
Ccna2	14	7	18	14	17	11	10	9
Ccnb1	23	13	14	19	24	25	7	4
Ccnb1ip1	2	0	0	1	0	5	1	1
Ccnb2	22	13	19	37	26	26	12	10
Ccnc	485	483	377	569	423	308	394	326
Ccnd1	1658	1570	1195	365	445	748	515	906
Ccnd2	61	57	34	60	22	47	39	38
Ccnd3	212	183	166	253	221	225	168	140
Ccndbp1	169	144	121	201	188	198	208	106
Ccne1	10	18	4	10	6	14	8	3
Ccne2	47	37	35	47	54	22	34	31
Ccnf	59	46	35	129	125	52	104	43
Ccng1	691	740	488	666	598	490	527	392
Ccng2	334	279	228	472	321	236	355	140
Ccnh	136	145	142	217	135	119	154	99
Ccni	1118	968	899	1390	961	811	1105	555
Ccnj	122	98	72	95	57	87	72	71
Ccnjl	10	9	4	23	11	9	7	11
Ccnk	273	244	181	297	126	160	194	169
Ccnl1	432	429	419	468	564	508	624	268
Ccnl2	811	774	725	760	530	623	777	409
Ccno	0	3	0	3	2	0	3	0
Ccnt1	112	106	103	97	60	57	90	97
Ccnt2	473	396	371	452	350	342	419	254
Ccny	408	376	290	466	338	334	341	251
Ccp110	46	51	33	27	36	25	32	25
Ccpg1	495.665	443.774	330.402	464.318	343.592	352.621	371.562	302.732
Ccr1	1	6	3	3	2	3	5	1
Ccr10	2	2	1	2	0	2	0	2
Ccr1l1	0	0	0	0	0	1	0	0
Ccr3	0	1	0	0	1	0	0	0
Ccr4	0	2	2	0	0	2	1	0
Ccr5	79	72	46	71	46	45	76	34
Ccr6	2	2	0	3	2	0	3	0
Ccr7	5	1	0	5	0	1	0	0
Ccr9	7	5	8	6	4	5	2	4
Ccrl2	11	10	13	14	11	16	16	4
Ccrn4l	17	31	34	14	10	9	6	23
Ccs	495	426	407	609	397	452	531	250
Ccsap	6	0	7	5	1	4	4	4
Cct2	884	724	706	990	749	680	798	534
Cct3	1090	1060	894	1554	1018	1111	999	662
Cct4	1349	1386	1264	1878	1393	1363	1484	867
Cct5	1120	1085	924	1870	980	1409	1303	703
Cct6a	454	488	396	553	368	365	388	338
Cct6b	4	0	5	11	2	1	4	3
Cct7	681	664	589	1014	590	607	735	414
Cct8	1060.32	1063	886.369	1499.03	1009.76	1040.11	1150.62	674.578
Cct8l1	1	2	0	2	2	3	1	1
Ccz1	466	426	393	594	431	387	509	284
Cd101	2	3	4	2	5	4	2	1
Cd14	365	361	296	313	354	372	377	248
Cd151	747	653	566	1035	675	784	745	391
Cd163	852	1236	641	975	654	650	823	597
Cd163l1	3	2	2	4	0	4	2	1
Cd164	15957	12865	11831	19150	10425	8595	13265	9842
Cd177	0	1	1	0	1	1	0	1
Cd180	33	38	8	40	14	21	25	26
Cd19	6	2	5	4	2	2	1	4
Cd1d1	709	611	497	904	561	482	709	350
Cd2	7	6	6	9	5	2	8	2
Cd200	12	3	5	15	15	26	23	2
Cd200r1	36	22	27	25	16	11	35	16
Cd209a	9	8	10	4	4	5	4	2
Cd209b	22	41	27	36	29	46	25	14
Cd209d	0	0	0	0	0	0	0	1
Cd209e	0	1	0	0	0	0	0	0
Cd22	115	166	65	141	65	89	114	88
Cd226	12	3	4	3	2	4	5	6
Cd24	14	6	4	12	5	39	4	3
Cd244	12	9	7	9	6	2	6	3
Cd247	10	19	6	16	6	12	10	5
Cd248	12	8	13	21	6	18	13	7
Cd27	6	9	7	11	7	6	6	6
Cd274	48	31	22	33	38	19	42	34
Cd276	64	42	51	71	51	59	59	28
Cd28	2	2	0	2	0	0	2	2
Cd2ap	236	216	167	201	140	185	230	162
Cd2bp2	547	475	412	528	326	389	400	333
Cd300a	84	129	83	126	65	73	124	39
Cd300e	1	5	0	1	1	2	2	2
Cd300le-ps1	54	89	37	115	83	68	84	46
Cd300lf	108	127	101	309	105	116	143	77
Cd302	4187	3603	3726	5339	4287	3487	4491	2495
Cd320	159	135	137	246	219	194	206	106
Cd34	8	4	12	12	6	16	10	9
Cd36	160.351	206.163	118.189	190.881	162.205	118.02	166.686	111.845
Cd37	32	36	16	46	30	30	38	18
Cd38	191	271	138	235	147	120	184	141
Cd3d	4	1	2	5	2	1	0	1
Cd3e	1	5	2	7	2	3	2	0
Cd3eap	38.508	37.8143	17.0828	30.5969	29.586	31.9767	11.604	26.3411
Cd3g	2	2	2	4	1	4	4	0
Cd4	238	248	189	257	144	187	210	155
Cd40	11	7	4	14	8	3	6	5
Cd40lg	1	0	0	0	1	0	3	0
Cd44	45	47	29	40	31	68	56	16
Cd46	22	18	22	18	16	11	5	21
Cd47	538	454	351	613	399	341	474	342
Cd48	121	151	111	172	127	108	145	92
Cd5	4	1	1	5	0	2	3	1
Cd52	5	8	4	8	4	5	11	3
Cd53	112	133	94	108	92	68	123	68
Cd55	3	1	2	3	1	12	8	1
Cd59	920	769	804	1199	784	810	1073	520
Cd5l	2198	2930	1645	2366	1636	1514	2097	1477
Cd6	9	8	2	12	5	3	7	2
Cd63	304	243	217	434	387	455	585	162
Cd68	433	475	329	565	306	343	443	273
Cd69	4	4	2	2	3	4	3	3
Cd7	25	36	23	35	20	33	25	15
Cd70	0	0	1	2	0	0	0	0
Cd72	4.23271	9.53807	5.74551	3.29754	4.51915	6.69888	15.2383	3.11841
Cd74	2811	3633	2057	2731	1916	2462	2923	1828
Cd79b	0	4	0	9	4	1	6	4
Cd80	4	2	1	1	0	0	0	2
Cd81	6647	5901	5236	7069	5141	5084	5853	3646
Cd82	881	762	626	1128	668	628	777	468
Cd83	28	35	27	32	21	20	25	10
Cd84	8	7	4	7	2	5	9	10
Cd86	14	20	12	20	8	8	17	10
Cd8a	24	22	18	33	25	18	18	15
Cd8b	3	0	2	7	3	1	1	2
Cd9	41	24	26	41	32	92	45	21
Cd93	212	306	197	293	119	185	175	188
Cd96	4	6	2	9	8	4	4	2
Cd97	220	249	205	280	160	160	217	165
Cd99	312	266	247	565	361	455	343	155
Cd99l2	392	342	312	446	245	204	303	225
Cda	3	1	2	2	0	4	7	3
Cdadc1	235	193	199	252	195	177	213	132
Cdc123	228	218	192	314	189	223	244	142
Cdc14a	26	40	22	31	20	19	23	16
Cdc14b	107	94	78	145	89	60	98	85
Cdc16	301	235	224	327	218	222	245	198
Cdc20	29	23	21	33	34	33	13	20
Cdc23	198	158	137	264	137	134	149	110
Cdc25a	122	129	107	106	64	91	57	91
Cdc25b	106	58	29	84	38	46	212	39
Cdc25c	10	12	9	10	9	6	9	5
Cdc26	149	113	124	193	144	131	190	96.9999
Cdc27	261	217	180	192	189	140	172	215
Cdc34	506	557	404	689	422	488	456	359
Cdc37	961	886	728	1326	790	898	923	573
Cdc37l1	486	506	364	551	454	541	512	307
Cdc40	262	209	185	293	223	194	265	150
Cdc42	1165	1079	851	1393	946	858	1037	741
Cdc42bpa	245	192	161	194	154	144	163	164
Cdc42bpb	959	759	659	955	475	585	673	494
Cdc42bpg	287	289	207	364	191	251	276	169
Cdc42ep1	267	235	225	331	161	266	253	145
Cdc42ep2	49	60	37	53	29	35	44	37
Cdc42ep3	31	48	34	36	31	29	33	33
Cdc42ep4	490	475	434	1263	653	637	615	311
Cdc42ep5	8	11	9	9	11	17	12	5
Cdc42se1	554	534	446	531	374	452	343	378
Cdc42se2	85	104	78	111	63	96	56	65
Cdc45	11	5	5	11	6	6	8	7
Cdc5l	440	447	338	502	362	346	411	229
Cdc6	2	3	1	2	6	3	4	4
Cdc7	4	2	7	6	5	3	3	1
Cdc73	152	133	119	139	93	93	104	100
Cdca2	14	17	12	16	20	14	14	4
Cdca3	18	7	16	21	23	14	7	3
Cdca4	79	62	68	76	56	70	63	53
Cdca5	4	2	2	2	2	1	1	1
Cdca7	12	10	9	7	7	10	9	7
Cdca7l	3	5	1	3	3	2	5	0
Cdca8	11	7	9	20	9	12	8	2
Cdcp1	3	5	3	5	3	15	2	4
Cdh1	1214	1011	746	1795	810	824	1239	638
Cdh10	1	3	1	2	2	1	2	2
Cdh11	17	9	5	11	10	23	36	11
Cdh13	8	3	6	7	9	5	11	5
Cdh15	0	0	0	1	3	3	1	1
Cdh16	0	3	1	1	2	0	0	2
Cdh17	2812	1603	1655	1441	1857	1672	2403	1742
Cdh19	3	0	2	0	2	1	0	0
Cdh2	3331	2922	2495	3854	2375	2659	3240	1864
Cdh20	1	2	2	3	3	0	1	0
Cdh22	2	0	0	2	2	1	1	0
Cdh23	10	7	6	16	8	6	7	6
Cdh26	2	0	5	0	1	1	3	0
Cdh3	11	9	4	9	7	8	8	6
Cdh5	171	252	151	215	95	122	133	140
Cdh6	1	1	3	3	1	3	2	5
Cdh7	0	0	0	0	0	2	0	1
Cdh8	2	0	1	3	1	2	0	0
Cdh9	2	3	4	0	1	0	1	0
Cdhr1	1	1	8	8	3	3	10	6
Cdhr5	11	11	6	10	3	3	4	7
Cdip1	768	769	592	1257	626	644	845	493
Cdipt	443	429	388	570	360	398	389	270
Cdk1	31	20	15	25	29	11	13	6
Cdk10	340	299	237	431	207	255	268	185
Cdk11b	454	438	389	558	321	393	344	281
Cdk12	406.001	338	278	303	215	226	274	284
Cdk13	398.999	381.001	254.001	347	293	289.999	336	304.001
Cdk14	63	50	46	81	52	41	61	36
Cdk16	666	606	506.001	791.002	546	484	611.001	387.001
Cdk17	82	95	56	102	115	77	86	66
Cdk18	215	142	151	316	145	156	229	126
Cdk19	218	199	141	241	139	131	169	126
Cdk2	166	148	105	180	113	145	135	109
Cdk20	114	116	103	169	104	81	120	65
Cdk2ap1	358	324	291	380	273	312	363	223
Cdk2ap2	784	677	622	1408	774	776	1094	476
Cdk4	411	375	323	494	325	389	414	289
Cdk5	124	131	101	163	104	116	126	68
Cdk5r1	5	2	3	2	2	1	1	6
Cdk5r2	0	0	1	0	0	0	0	0
Cdk5rap1	118	86	72	140	75	86	111	45
Cdk5rap2	71	64	51	108	60	67	69	41
Cdk5rap3	544	510	359	712	406	488	563	318
Cdk6	35	30	21	25	28	38	28	29
Cdk9	518	474	358	551	373	415	433	292
Cdkl1	5	4	5	5	2	3	2	0
Cdkl2	15	5	4	3	7	2	4	9
Cdkl3	6	8	4	14	7	12	8	12
Cdkn1a	514	623	717	1064	461	539	297	530
Cdkn1b	243	228	213	320	229	205	248	122
Cdkn1c	26	11	16	33	23	20	21	13
Cdkn2a	1	1	0	3	1	0	4	0
Cdkn2aip	250	218	183	258	214	182	254	161
Cdkn2aipnl	198	176	165	255	139	179	182	105
Cdkn2b	6	9	5	6	4	10	7	4
Cdkn2c	13	24	6	9	9	12	11	10
Cdkn3	5	3	4	8	6	7	1	1
Cdnf	2	0	1	0	0	0	1	1
Cdo1	16401	15340	16564	19866	18116	18024	17979	9892
Cdon	169	141	99	135	92	83	117	117
Cdr2	14	13	9	26	12	18	37	18
Cds1	62	57	49	49	29	54	28	53
Cds2	277	202	210	293	228	165	246	136
Cdt1	20	10	10	15	13	9	7	7
Cdv3	137	113	103	125	70	109	97	83
Cdx2	4	6	7	2	4	7	4	2
Cdx4	1	1	0	1	0	1	0	1
Cdyl	39	44	30	42	33	35	36	31
Cdyl2	9	15	6	5	9	1	10	0
Ceacam1	2756.96	2586	2359	2658.99	2130.01	2088	2503.04	1649
Ceacam10	134	137	132	133	82	89	153	100
Ceacam11	1	0	0	0	0	2	0	1
Ceacam16	1	1	3	1	6	1	6	1
Ceacam19	2	0	0	2	1	1	1	3
Ceacam20	19	25	26	31	9	14	30	25
Ceacam3	2	1	2	6	0	2	2	2
Ceacam9	1	0	0	0	1	1	0	0
Cebpa	1761	1423	1027	2744	1002	1119	1514	972
Cebpb	872	803	964	927	810	798	700	567
[truncated: 14,552 more rows]

## Sheet: RPKM_all_samples_Partek
Sample ID	DB_10_TH3_2-1-1	DB_11_TH3_3-2-1	DB_12_TH3_4-3-1	DB_60_CH3_1-4-1	DB_61_CH3_2-5-1	DB_62_CH3_3-6-1	DB_63_CH3_4-7-1	DB_9_TH3_1-8-1
Number of Alignments	23160868	20636221	18698530	25970188	18682894	17233871	21029009	13623208
Attribute	T_Group	T_Group	T_Group	C_Group	C_Group	C_Group	C_Group	T_Group
A1bg	0.356829	0.400483	0.347274	1.79572	0.442355	0.0685068	0.786006	0
A1cf	28.7147	27.4416	24.4866	21.2887	24.9955	19.9647	24.3255	31.836
A1i3	1040.33	903.339	920.098	692.563	694.542	788.46	910.827	1022.32
A2m	4.04955	3.79277	2.94644	2.21404	3.01911	3.29833	3.15012	4.39719
A3galt2	0.0677807	0.278934	0.139927	0.0604485	0.168053	0.242911	0.199072	0.153646
A4galt	0	0.0293332	0	0.0233085	0	0.0351243	0	0.0444335
AA926063	1.15557	1.41485	2.08195	0.749502	1.30231	1.27063	1.50412	0.535797
Aaas	1.85267	1.85111	1.62315	1.8336	1.00832	2.00401	1.0949	1.57487
Aacs	0.595348	0.501138	0.217876	0.95329	0.603853	0.872834	0.610996	0.690105
Aadac	22.2312	18.7648	20.2542	24.2738	22.4512	16.0848	25.9881	20.928
Aadacl2	0	0.0401812	0.0443451	0.0319284	0.0887643	0	0	0
Aadacl3	0	0	0	0	0.0436226	0	0	0
Aadat	72.0321	70.8796	68.4392	71.0514	64.8276	52.5082	62.3267	79.1661
Aagab	4.2501	3.92304	3.19798	3.75492	2.70825	3.9502	2.44985	4.59198
Aak1	0.557567	0.644007	0.49618	0.328283	0.382512	0.429224	0.411382	0.662625
Aamdc	4.83022	5.64243	4.09038	5.27475	5.74354	8.41234	5.6456	3.01661
Aamp	22.4431	24.266	22.1703	25.9601	23.1548	27.164	21.4894	20.6412
Aanat	0	0.036963	0	0.146856	0	0.0442603	0	0
Aar2	3.6378	3.95353	2.71173	4.28657	3.20374	3.71645	3.22703	3.41415
Aard	0	0	0.0429215	0	0	0	0.0381648	0.117824
Aars	46.9765	46.2971	43.6047	43.452	44.1027	51.0029	38.8289	51.3807
Aars2	1.58517	1.38536	1.36798	2.16689	1.27248	1.69379	1.14483	1.83345
Aarsd1	1.98512	1.8029	1.65002	2.43427	1.76473	2.59762	2.11444	1.55423
Aasdhppt	12.9529	15.2831	13.4729	16.55	15.6457	15.2316	17.0095	15.8807
Aass	76.3112	85.6627	77.1407	36.966	57.2234	36.1776	36.5397	82.8673
Aatf	2.91699	3.08446	2.35898	2.96694	2.51038	3.53141	3.02685	3.2788
Aatk	0.187475	0.2653	0.212022	0.276235	0.232409	0.273859	0.143639	0.221723
Abat	48.7329	37.306	36.9245	46.0506	34.6593	32.0569	41.654	46.2553
Abca1	10.7129	9.46594	7.40349	7.62393	7.36234	6.9206	8.46889	11.1248
Abca13	0.0171448	0.0224493	0.0318545	0.0178385	0.0389658	0.0268813	0.02203	0.0194319
Abca15	0.0324268	0	0.0100413	0.0144595	0.0401989	0.0435789	0	0.0137822
Abca17	0.178481	0.182106	0.110538	0.130233	0.100573	0.0981262	0.107223	0.110341
Abca2	3.43668	2.7525	2.89784	2.91143	2.56023	3.01402	2.81363	3.27338
Abca4	0.18083	0.128537	0.201586	0.0860102	0.0672517	0.12151	0.119497	0.112725
Abca5	0.267242	0.18746	0.227575	0.193646	0.217413	0.190799	0.156365	0.269764
Abca7	0.17236	0.28273	0.205282	0.230573	0.197236	0.231638	0.211738	0.225408
Abcb10	2.83988	3.1168	2.45921	3.19387	2.63263	2.04338	2.54651	3.28994
Abcb11	85.5842	74.0803	69.9103	60.1253	79.9425	73.5256	65.4211	83.0582
Abcb1a	1.88869	1.63664	1.51246	1.86457	2.38493	3.22297	3.67656	1.16491
Abcb1b	1.60981	1.30834	1.07263	0.831699	1.45889	1.90981	1.22277	1.05699
Abcb4	26.4689	23.9318	26.5075	20.021	27.1321	27.8699	25.905	24.9499
Abcb6	9.2488	8.26675	8.55908	10.6862	7.49311	9.93961	8.37996	8.57199
Abcb7	6.50703	6.15874	5.92438	5.27407	5.19391	4.50948	5.39033	6.42956
Abcb8	4.38808	4.4505	3.8396	5.92395	3.34375	3.70604	4.19002	4.7225
Abcb9	0.725541	0.681054	0.604572	0.752937	0.42519	0.177285	0.595688	0.224272
Abcc1	0.268822	0.350373	0.214823	0.208808	0.161252	0.29135	0.143262	0.250627
Abcc10	1.41285	1.37626	1.28775	1.74341	1.2007	1.24195	1.18419	1.45026
Abcc12	0.0380324	0.0106713	0.0117772	0.0169591	0	0.0127781	0.031416	0.0161648
Abcc2	62.157	50.3996	44.5305	65.0165	54.1344	55.0874	69.1931	73.643
Abcc3	0.442078	0.535077	0.311368	0.363334	0.300883	0.477622	0.391425	0.309473
Abcc4	0.598172	0.671353	0.75307	0.515975	0.510571	0.5535	0.432009	0.816898
Abcc5	0.699302	0.987399	0.689225	0.704127	0.671159	0.788222	0.728787	0.869293
Abcc6	58.4581	52.2513	51.4521	50.0341	44.479	43.5064	48.5909	43.9408
Abcc8	0.536995	0.570971	0.665147	0.856989	0.35037	0.493778	0.466921	0.336349
Abcc9	1.51244	1.59762	1.74622	1.50141	1.22168	1.14965	1.90696	1.61724
Abcd1	9.1517	8.01248	6.14606	8.45522	4.88017	5.97094	7.2773	7.7041
Abcd2	0.156549	0.184487	0.145432	0.48167	0.261996	0.336622	0.318976	0.186305
Abcd3	106.946	109.36	112.578	61.9614	56.4797	56.6524	57.6341	104.387
Abcd4	1.46484	1.35634	1.11133	1.77995	1.27116	1.40265	1.87551	1.02728
Abce1	14.4672	15.6191	15.238	12.3665	12.6288	13.6401	11.3852	17.3404
Abcf1	9.25804	10.3593	8.61355	4.42093	7.91102	10.5842	5.96724	9.75715
Abcf2	8.72587	9.15306	7.2748	8.59008	6.63601	8.90788	6.70885	7.4745
Abcf3	10.1007	10.0683	9.01232	10.3058	9.91123	10.7446	9.5597	9.37198
Abcg1	1.70062	1.99107	1.80338	1.39664	1.41055	1.72645	1.80565	1.83042
Abcg2	0.8536	0.98031	0.811423	1.68186	0.615229	1.25388	0.896408	1.14747
Abcg3	15.786	14.6315	11.7686	12.6898	11.6526	10.8175	9.84277	15.7789
Abcg3l1	2.28111	1.3883	1.23706	1.58688	1.64796	1.16278	1.4512	1.70201
Abcg3l2	2.12368	1.3282	1.79584	1.78964	1.42862	1.05385	1.6984	1.79806
Abcg3l3	2.11719	1.71825	1.61575	1.82367	1.34623	1.10409	1.41433	1.94452
Abcg3l4	0.0728044	0.369531	0.352541	0.0998409	0.120129	0.0587417	0.164618	0.192129
Abcg4	0.057263	0	0.0993	0.0204274	0.0851855	0.0769566	0.0252272	0.0194706
Abcg5	2.20251	1.72646	1.58059	3.63232	3.81392	7.49395	5.60244	0.980703
Abcg8	0.402347	0.291012	0.287944	0.861175	0.798052	1.44192	1.25063	0.410419
Abhd1	25.0434	27.2259	30.9491	22.1706	14.3363	21.7774	16.9784	27.459
Abhd10	1.26885	0.830717	0.611202	0.628664	0.961263	1.23156	0.970477	1.19844
Abhd11	2.18328	2.07015	2.05155	3.45779	2.09993	2.88356	2.94358	2.11189
Abhd12	6.15855	5.09697	5.84467	7.50752	5.57494	6.5498	6.88048	5.27275
Abhd12b	0.069527	0.078033	0	0.124012	0	0	0	0
Abhd13	4.06182	4.36613	4.27193	3.84109	3.58656	4.54712	4.29357	5.65502
Abhd14a	2.01388	2.39724	2.68346	3.15665	2.64787	3.07554	3.32705	1.86753
Abhd14b	110.147	99.0399	111.103	124.856	128.8	137.161	146.223	107.24
Abhd15	6.14614	7.64887	5.85209	3.07001	2.47065	3.1279	3.14669	6.7528
Abhd16a	10.5239	10.72	9.42193	7.70885	6.2151	8.0155	6.37853	9.00101
Abhd16b	0.0682449	0.076594	0.0563542	0	0	0	0.0250545	0
Abhd2	112.113	95.8391	75.5542	66.3714	75.3794	62.7006	77.1949	119.232
Abhd3	0.0677452	0.126722	0.0559416	0.0604169	0.279942	0.15174	0.124355	0
Abhd4	10.2226	10.6249	10.0317	12.6801	9.48232	8.94929	9.81197	9.7607
Abhd5	16.2885	15.2198	11.8255	14.2832	10.5311	11.626	14.4634	24.7772
Abhd6	9.96074	9.11072	10.492	11.2439	7.41376	8.98575	8.94055	9.73388
Abhd8	0.631742	0.611232	0.674573	1.08795	0.864176	0.966112	1.22362	0.555531
Abi1	7.27028	6.93416	6.37134	5.98408	6.30543	4.94325	7.21608	7.47477
Abi2	0.494892	0.555437	0.642898	0.484416	0.613509	0.308214	0.66471	0.71824
Abi3	2.79632	3.42636	2.63746	3.08869	3.05311	4.44757	3.10806	3.35836
Abl1	2.81158	2.88012	2.66619	2.91388	2.65104	2.92105	2.40161	2.64627
Abl2	0.711193	0.952691	0.8525	0.2046	0.554588	0.524139	0.379012	1.48212
Ablim2	0.15071	0.253573	0.248902	0.298682	0.0622775	0.135028	0.258204	0.164096
Ablim3	5.21224	4.48151	6.17296	4.78433	5.23346	7.23012	3.9446	5.44118
Abo	0.168987	0.0316102	0	0.251179	0.0349151	0.378508	0.124079	0.191531
Abo2	0	0	0	0	0.0532586	0.0577366	0	0.219117
Abol1	0	0.187098	0.0516218	0.111503	0	0	0.137703	0
Abp1	0.0156153	0.0175257	0.0193418	0.0557044	0.019358	0.0839425	0.0171983	0
Abr	1.21883	1.28921	1.22731	0.81328	0.684823	0.671698	0.782255	1.25222
Abracl	5.8501	5.99486	6.30105	5.50081	6.30632	8.63115	7.00344	4.64857
Abt1	3.94334	4.72583	3.684	4.79831	4.34993	5.6139	4.2695	4.48833
Abtb1	10.8456	9.50166	8.47407	11.9986	9.36047	9.74775	11.0126	7.89668
Abtb2	7.93738	6.91803	6.53066	7.97642	5.62107	5.72008	5.94417	7.3176
Acaa1a	150.266	147.691	135.241	146.205	119.559	149.378	134.438	121.379
Acaa1b	182.497	209.029	158.227	41.5107	52.0748	48.3013	41.6021	146.215
Acaa2	238.98	256.125	297.005	262.244	221.888	352.858	235.735	232.712
Acaca	10.832	10.6251	8.75941	9.90259	5.6408	5.9622	4.51729	14.1608
Acacb	12.7838	9.3649	9.0984	14.4859	5.8544	5.60283	7.53353	12.2016
Acad10	18.4279	19.0353	18.7769	18.9777	19.8057	23.4208	21.0858	17.4367
Acad11	46.0555	43.9063	46.8281	39.7114	37.7887	40.2089	39.074	40.5862
Acad9	11.8235	10.9691	10.3107	12.9403	10.9767	10.8783	11.6791	10.937
Acadl	123.51	125.644	139.44	162.154	112	117.572	124.577	119.199
Acadm	191.077	188.723	203.843	187.915	189.845	199.241	193.671	192.813
Acads	45.3746	46.0189	46.0149	55.1151	43.2976	56.5315	46.5196	41.1954
Acadsb	16.5252	13.0969	14.8737	17.3561	16.6128	17.959	17.8273	16.9591
Acadvl	76.9655	77.091	82.6627	84.6136	64.2452	82.5935	72.0766	75.4994
Acan	0.0248926	0.0069845	0.0308332	0.0221999	0.0462885	0.0669072	0.0411243	0.03174
Acap1	0.367383	0.294521	0.39005	0.499263	0.390376	0.540754	0.28902	0.386651
Acap2	2.29212	2.12573	1.71842	1.76444	1.31606	1.41051	1.32868	2.05097
Acap3	2.36303	2.69578	1.97539	2.38492	2.26637	3.08423	2.34554	2.87665
Acat1	81.0568	83.1889	79.5716	74.0508	57.2974	75.3399	62.6137	78.4433
Acat3	3.15344	3.85438	3.18366	6.97302	5.62293	4.23796	3.61586	2.64387
Acbd3	6.0616	6.57641	5.45907	6.98261	6.08985	6.1776	5.59124	6.16174
Acbd4	5.14636	4.66416	4.8183	6.24883	5.99048	6.26686	6.09385	5.25782
Acbd5	8.10428	8.43711	6.36916	7.12791	6.20127	6.27199	6.49434	7.41168
Acbd6	2.66195	3.2831	3.29722	3.52186	3.0824	3.85263	3.31843	3.03364
Acbd7	0	0	0	0.0722433	0	0	0	0.137719
Accs	2.42131	1.90481	1.99009	2.19975	2.27228	1.61181	1.69477	2.15442
Accsl	0	0	0.0246793	0.0355382	0.0247	0.0267768	0	0
Acd	5.86344	5.03236	5.98108	6.45956	4.97544	6.74222	5.62905	5.1175
Ace	0.0504396	0.0566104	0.0312384	0.0337375	0.0625291	0.20336	0.055553	0.0857525
Ace2	0.018805	0.126634	0.186342	0.0838539	0.186498	0.151634	0.248537	0.0639409
Ace3	0.0168987	0.0379323	0	0	0.0209491	0	0.0186119	0.0861888
Acer1	0.035624	0.0799645	0.0661883	0	0	0.143627	0.0588532	0
Acer2	2.16844	3.49555	3.18371	3.12854	4.7121	5.33333	2.56347	3.57271
Ache	0.568708	0.536158	0.67625	0.6492	0.592214	0.550292	0.776688	1.04421
Acin1	9.26874	9.07089	8.80727	9.09104	8.28182	9.15395	8.3046	8.91143
Acly	37.3442	35.822	24.0988	67.6373	19.0601	21.6343	20.7505	53.4292
Acmsd	14.3607	10.0405	10.906	10.8757	17.4525	11.5165	8.55649	16.57
Acn9	3.46952	3.17288	3.66084	3.43801	2.5488	4.83544	3.96278	2.18465
Acnat2	36.1912	35.3517	42.7192	48.0834	66.5137	65.6818	68.5893	37.6298
Aco1	37.0408	34.9986	35.2095	37.3662	31.6162	31.6393	31.9205	32.5189
Aco2	20.7013	23.427	21.8216	24.3051	17.7377	20.9368	21.5025	20.9051
Acot1	2.68994	3.41951	2.07393	0.269271	0.340273	0.516436	0.241848	3.17322
Acot11	0.204776	0.105702	0.0260624	0.0230925	0.0521685	0.0746744	0.0828506	0.035772
Acot12	53.0719	51.4126	52.6024	32.0956	31.1863	34.1145	35.8741	50.5568
Acot13	8.48417	6.71766	7.91765	10.2613	6.55554	7.6534	8.32024	7.01439
Acot2	30.9497	34.818	35.9171	9.55319	6.85463	10.3249	7.73797	32.9481
Acot3	20.7655	24.8281	23.7659	3.41039	3.58303	3.73489	2.76701	20.8268
Acot4	28.0672	29.8587	31.5552	6.90241	5.59509	6.89479	5.12621	34.1693
Acot5	6.9527	7.93335	8.23876	7.81275	4.85545	4.95224	4.62005	7.99841
Acot7	18.6173	17.5717	19.06	13.5313	12.1005	12.9066	11.6175	15.8406
Acot8	5.72181	6.1455	5.85148	7.20399	5.06659	5.49259	5.85173	5.55866
Acot9	1.0109	1.58244	0.889688	1.2337	1.58299	1.17981	1.69938	1.3116
Acox1	206.295	191.373	198.441	83.0858	75.0551	83.6085	75.6366	176.533
Acox2	149.324	140.595	141.176	224.914	176.542	164.158	207.039	150.766
Acox3	58.6344	54.0671	49.89	50.9844	44.7073	40.1834	47.003	60.1789
Acoxl	0.0279097	0.0626483	0.0172851	0.0124453	0.0518987	0.0187541	0	0.0237247
Acp1	2.59058	3.25364	3.55261	3.68554	2.40631	3.89159	3.3627	3.14306
Acp2	37.9748	33.9589	34.2566	39.8822	29.7506	34.0991	36.0726	35.7315
Acp5	5.89559	5.77016	5.62791	7.93952	6.55928	7.75128	7.54643	5.80798
Acp6	8.39173	7.97792	8.27475	9.42098	8.52645	9.59717	7.35772	8.0006
Acpl2	2.36561	2.03837	2.06056	2.98082	2.15689	1.96904	2.65586	1.58277
Acpp	16.0396	12.8055	12.0904	7.4768	4.955	4.02026	4.40966	17.8239
Acpt	0.405931	0.248505	0.182838	0	0.0457478	0.297565	0.162576	0.125477
Acr	0	0	0	0.0256022	0.0355884	0	0.0316179	0.048806
Acrbp	0.342669	0.538428	0.891336	0.611201	0.637201	0.967088	0.566111	0.873859
Acrv1	0	0	0	0.0465607	0.0647218	0.0701636	0.057501	0.0887595
Acsbg1	0.338448	0.470295	0.179665	0.445568	0.319671	0.433186	0.497012	0.301398
Acsbg2	0.0165236	0	0.0204669	0.0442086	0.0409682	0	0.0181988	0
Acsf2	14.4621	13.953	13.6475	28.4298	16.2449	15.0143	21.2171	11.5676
Acsl1	563.969	516.114	519.39	383.406	273.999	283.739	362.034	532.275
Acsl3	4.33478	3.67507	3.14816	2.0859	2.14564	2.36795	1.92343	3.81733
Acsl4	53.9925	55.4153	53.7221	44.3425	57.0918	48.2629	44.7952	60.7675
Acsl5	74.4663	75.0167	67.1884	110.03	60.5201	57.3159	65.5763	80.0885
Acsl6	0	0.0189069	0.0208662	0	0.0417674	0	0.0742152	0
Acsm2a	2.90096	2.73653	3.37282	8.80901	9.57535	8.7301	12.055	2.05749
Acsm3	6.53752	4.19145	5.56664	8.16275	10.493	9.65854	12.0296	6.71641
Acsm4	0.0210001	0.0942772	0	0.0374569	0.130168	0.11289	0.0462581	0.0357024
Acsm5	16.1733	17.1557	18.2079	30.5417	32.9909	38.9857	43.7405	11.4694
Acss1	0.432363	0.566135	0.282649	0.332038	0.223331	0.58106	0.357146	0.490042
Acss2	12.7857	10.885	11.0803	19.958	15.4955	10.666	12.1413	12.2639
Acss3	19.8201	18.9905	17.323	16.1781	19.0033	14.9459	17.039	21.7928
Acta1	0.540454	0.842463	0.818194	0.669431	0.558326	1.4123	0.925935	1.07197
Acta2	1.31121	1.57674	2.20417	2.39442	1.58678	4.78299	1.3066	1.91074
Actb	323.002	362.595	302.349	346.673	235.23	339.98	258.383	362.201
Actbl2	0.204255	0.0705364	0.116769	0.0980858	0.0973888	0.0633464	0.0692189	0.0267118
Actc1	0.173981	0.0650886	0.359168	0.310321	0.143788	0.116908	0.255492	0.147893
Actg1	38.0827	46.9625	37.5894	53.1735	38.5356	43.8228	38.0374	43.0956
Actg2	0.176662	0.23793	0.306351	0.346614	0.0876021	0.759742	0.194572	0.120138
Actl11	0.0234018	0.0262648	0.0289865	0.0104351	0.0435162	0.015725	0.0128871	0
Actl6a	4.12322	4.90485	4.2122	3.13641	3.21886	3.43058	3.4502	3.87969
Actl6b	0.0276417	0	0	0.0246515	0.102801	0.0371481	0	0.0469937
Actl7a	0.409531	0.229817	0.362332	0.286967	0.0362635	0.275188	0.0966532	0.298391
Actl7b	0.124338	0.279099	0.308021	0.138609	0.0770697	0.0417749	0.0684714	0.264234
Actl9	0.0313326	0.0351658	0	0.0279432	0	0.0421083	0	0
Actl9b	0	0	0	0.0575571	0.0400037	0	0	0.109722
Actn1	5.75292	7.0497	5.08988	5.71957	4.33002	6.17332	5.41481	6.41226
Actn2	0.0733542	0.0823284	0.036344	0.130838	0.0727488	0.138015	0.145423	0.0748258
Actn3	0.030109	0.0675851	0.0372944	0.0671299	0.0559884	0.0404639	0.0829033	0.127971
Actn4	40.1312	38.8991	38.3487	49.0706	37.9156	40.7847	43.6588	37.9985
Actr10	7.86942	7.7493	7.91745	9.27686	8.48474	9.1171	9.0989	9.12426
Actr1a	8.37935	9.47454	8.15635	8.47487	8.20186	11.4708	8.06018	7.03003
Actr1b	14.5734	14.2812	12.5113	14.7185	15.5553	17.5757	13.4305	14.006
Actr2	15.8722	14.0578	12.0669	12.7367	10.9268	14.1612	12.7734	13.8583
Actr3	17.8076	18.2473	15.9161	16.563	14.0087	13.6873	14.0157	19.3169
Actr3b	0.196256	0.176213	0.194473	0.0700103	0.048659	0.316501	0.345843	0.266924
Actr5	1.15268	0.942556	1.04023	0.969251	0.959447	1.37207	1.03377	0.811869
Actr6	1.49233	1.4194	1.12788	1.69181	1.88137	1.15575	1.36503	1.63407
Actrt1	0.0637759	0	0.0394979	0	0.0395309	0	0	0
Actrt2	0.0616364	0.0345885	0.0381728	0	0	0	0.0339424	0
Actrt3	0.0386884	0.0434216	0	0.0345033	0.191846	0	0	0
Acvr1	2.98353	2.45015	2.85428	1.96855	2.91681	3.16205	1.78993	3.54649
Acvr1b	3.03524	2.93817	3.10166	2.77458	2.44578	2.93186	2.61167	2.64461
Acvr1c	0.699778	1.07336	0.548959	0.499263	0.780752	0.438873	0.488122	1.15004
Acvr2a	4.3081	3.65846	3.18756	2.53305	2.62307	3.38161	3.17022	4.24545
Acvr2b	0.479736	0.699956	0.475379	0.556193	0.713665	1.09603	0.581208	0.570921
Acvrl1	0.73932	1.00955	0.900493	0.82418	0.931798	1.07638	0.759985	1.19407
Acy1	27.5469	27.5183	24.6831	39.0284	24.2194	29.4502	30.1243	29.3395
Acy3	32.7704	27.3993	31.507	32.201	33.0487	41.7764	37.1113	30.5523
Acyp1	2.48517	2.16485	2.41991	2.53364	1.44007	1.96227	2.17935	2.37576
Acyp2	1.5907	1.78531	1.64193	2.16172	1.97197	0.76349	1.33483	1.41657
Ada	0.773768	1.25054	0.996762	0.910887	0.767382	1.24786	1.02265	1.21025
Adad1	0.0225817	0	0	0.020139	0	0.0606959	0.049742	0
Adam10	3.58186	3.7	3.0661	3.03162	2.87069	3.44932	3.44244	3.8399
Adam11	0.683169	0.805086	0.571188	0.258939	0.29642	0.550873	0.470267	0.377474
Adam15	2.89691	2.52496	1.98499	2.95458	2.46421	4.10029	3.07179	2.38393
Adam17	3.12765	3.25026	3.10446	3.06167	2.88512	3.0994	3.24755	3.43746
Adam19	0.412184	0.308407	0.40844	0.373723	0.332135	0.396991	0.317779	0.408774
Adam1a	0.376362	0.642058	0.559416	0.308797	0.410581	0.465335	0.364775	0.588666
Adam2	0.0178341	0	0.0441802	0.0636195	0.0221086	0	0.0589261	0.0303198
Adam23	1.17098	1.29739	1.00415	1.0577	0.874711	1.17019	1.32276	1.96527
Adam26a	0	0	0	0	0.0349151	0	0	0
Adam26b	0.0201853	0	0.0250024	0.0180017	0.0250233	0	0	0
Adam28	0.295855	0.498074	0.595496	0.709098	0.848146	0.745507	1.01827	0.408674
Adam30	0.0125476	0.0281653	0.0777102	0.044761	0.0311101	0.0337258	0.0276393	0
Adam32	0.0391622	0.0219766	0	0.0174629	0	0.0526306	0	0
Adam3a	0.018295	0	0.0226611	0.016316	0.02268	0.024587	0	0.0622069
Adam4	0.299958	0.297048	0.174843	0.125887	0.218737	0.308267	0.194333	0.389969
Adam4l1	0.210274	0.235999	0.130228	0.0937639	0.173782	0.400337	0.154394	0.0297906
Adam5	0.0171199	0.0192143	0	0	0.0212232	0.0230076	0.0188554	0
Adam6	0	0.0194769	0.0429905	0	0.0430264	0	0	0
Adam7	0.0481878	0.0405623	0.0298438	0.0322313	0	0.0971405	0.0132682	0
Adam9	5.49821	5.32511	5.20282	5.05278	5.15527	5.64499	5.91727	6.73781
Adamdec1	0.577127	0.283383	0.558481	1.46367	1.29676	0.896798	1.41031	0.153309
Adamts1	1.07669	1.4634	1.34587	1.20688	1.12658	1.36733	1.51222	1.59538
Adamts10	2.85647	3.06292	3.11726	3.51343	2.44851	2.25479	2.33907	2.96072
Adamts12	0.911785	0.848066	0.867313	0.714316	0.674447	0.731155	0.854418	0.864989
Adamts14	0.122209	0.123444	0.105961	0.130786	0.10605	0.13139	0.107678	0.166214
Adamts15	0.0783211	0.0399559	0.0970121	0.0380993	0.05296	0.153101	0.0392096	0.145259
Adamts18	0	0	0	0.0102029	0.0141825	0.03075	0	0
Adamts19	0.0198284	0.0333813	0.0368405	0.0530503	0.0368713	0.079943	0.0218385	0.0505654
Adamts2	0.819371	0.625848	0.873951	1.24834	0.677173	1.05528	0.940037	1.00607
Adamts3	0.061651	0.0345967	0.0254546	0.0549819	0.0509518	0.0552359	0.0905347	0.15722
Adamts4	0.387927	0.435386	0.240252	0.184514	0.176332	0.225914	0.170902	0.571581
Adamts5	0.0155422	0.0174437	0.0577539	0	0.0770697	0.104437	0.0513535	0.0792701
Adamts7	2.36425	2.27565	1.81963	2.56568	1.58403	1.64523	3.37079	1.75608
Adamts9	0.319824	0.425875	0.456579	0.29973	0.21504	0.284116	0.400009	0.359418
Adamtsl3	0.20198	0.133348	0.154524	0.137747	0.110467	0.127739	0.1832	0.151495
Adamtsl4	12.3776	12.3419	12.6047	9.12172	12.3707	10.8152	11.448	9.62127
Adamtsl5	0.287568	0.414963	0.40708	0.183186	0.152783	0.331257	0.271475	0.0698422
Adap1	0.0548851	0.143733	0.0453222	0.114212	0.20412	0.24587	0.241797	0.279931
Adap2	8.90773	10.321	7.62611	7.8974	8.83421	7.53483	7.44464	10.0663
Adar	7.18009	6.6617	4.62467	4.90926	4.06481	5.1142	3.76947	6.87655
Adarb1	1.17432	1.21298	0.952139	0.907821	0.836656	1.01436	1.01834	1.24065
Adarb2	0.0158736	0.0178156	0.0196618	0.028313	0.0196783	0	0.0174829	0
Adat1	1.35588	1.15717	1.36456	1.2344	0.857939	1.02498	1.02667	1.29664
Adat2	1.46148	1.26536	1.86198	2.19713	2.22589	1.79575	1.56365	1.84575
Adat3	1.38668	1.41485	0.858805	0.899403	1.17208	1.52475	1.04131	1.33949
Adc	0.123803	0.243161	0.115011	0.165616	0.0383691	0.249571	0.204531	0.157858
Adck1	1.78517	1.81719	1.36272	1.29586	1.44105	1.19956	1.0288	1.58807
Adck2	4.09727	3.90296	3.96623	4.54453	3.67077	3.67864	3.07163	4.27313
Adck3	87.2716	72.8045	67.1831	102.697	80.0294	73.0559	95.6415	69.6013
Adck4	3.2135	3.97656	2.62808	4.06	3.29423	3.65426	3.56196	3.50211
Adck5	16.959	16.2176	14.2542	18.4233	15.4997	16.9192	13.294	17.4316
Adcy1	5.33835	5.14843	6.61233	3.57664	10.2261	7.60692	3.8409	4.6747
Adcy10	1.20492	1.35233	1.97959	0.932793	0.995812	0.865881	1.88002	1.47946
Adcy2	0.0342488	0.0128129	0	0.0203626	0.0283051	0.0460274	0.062868	0.0388176
Adcy3	0.234094	0.409864	0.440739	0.292279	0.348243	0.364939	0.360956	0.382065
Adcy4	1.20039	1.67343	1.09558	1.048	0.830208	1.15473	1.002	1.28892
Adcy5	0.925842	0.839281	0.782905	0.81775	0.78356	0.562307	0.627508	1.10485
Adcy6	8.77181	7.99811	7.63484	6.85667	6.5066	8.34274	7.69197	6.79696
Adcy7	0.383651	0.2793	0.321086	0.314408	0.257084	0.348375	0.228402	0.370194
Adcy8	0.0469205	0	0.0232472	0.0418449	0.0349	0.0504458	0.0206709	0.0478619
Adcy9	1.58944	1.51509	1.02483	1.35925	0.944716	0.994886	1.51077	1.18453
Adcyap1	0	0	0.0424109	0	0.0848928	0	0.0377108	0
Adcyap1r1	1.01417	0.881967	1.06054	0.819439	0.824516	0.571414	1.01753	1.11971
Add1	11.7764	11.0121	10.7748	15.8803	13.0504	12.3468	16.1221	11.0241
Add2	0.233081	0.186145	0.0569081	0.210248	0.0963154	0.126114	0.44647	0.150902
Add3	0.999483	1.12619	0.912214	1.1941	1.0106	1.20519	1.05992	1.32361
Adh1	301.07	250.323	292.516	254.372	228.187	240.685	247.419	269.078
Adh4	5.50222	5.92109	5.01126	8.31307	7.06176	4.82819	10.0525	4.23697
Adh5	49.122	49.1223	49.1616	66.4896	60.9343	56.4774	67.8844	42.8676
Adh6	0.116441	0.0522745	0.115383	0.0830759	0.02887	0.0312973	0.153894	0.0395923
Adh6a	0	0.0799645	0	0.0635407	0	0.0478756	0	0
Adh7	6.037	5.02781	5.39029	5.23175	5.57992	3.81293	5.63874	4.35202
Adhfe1	72.8367	61.513	72.5267	63.2979	59.4657	61.433	64.7453	68.0254
Adi1	66.8017	57.4569	67.6438	87.5023	71.8553	66.5038	75.9985	61.617
Adipoq	0	0	0.0359651	0	0.0359952	0.819456	0	0
Adipor1	23.1963	23.3567	23.0595	27.6967	26.3267	23.9601	24.633	26.327
Adipor2	46.2733	40.6479	35.8791	38.4082	25.43	27.9599	28.7728	54.2633
Adk	142.554	146.603	145.723	131.256	130.592	135.292	123.551	148.161
Adm	0.747102	0.628877	0.655488	0.360904	0.308723	0.627526	1.06284	0.52923
Adm2	0.210411	0.330613	0.156375	0.15012	0.208674	0.282774	0.0926966	0.143088
Adnp	10.6304	9.84216	10.4225	9.09367	8.22182	8.62695	10.0579	9.42523
Adnp2	1.60598	1.34029	1.42818	2.15757	1.53147	1.59106	1.67809	1.94274
Ado	1.85041	2.57127	2.12829	1.80741	1.9116	2.30917	1.11605	2.62158
Adora1	1.56785	0.947512	1.14529	1.11143	0.64788	0.864436	1.54969	1.23024
Adora2a	1.07723	1.28703	1.14062	1.34809	1.40005	1.14416	1.66485	1.0634
Adora2b	0.0939125	0.131752	0.0872433	0.12563	0.0873163	0.0946579	0.0517165	0.0798305
Adora3	1.12655	1.48426	1.06172	0.982845	0.546482	0.625343	1.24076	1.54053
Adpgk	4.30256	4.3592	4.43767	3.64304	3.29991	4.13984	2.74736	4.44011
Adprh	2.4729	2.67973	2.53494	3.19402	3.13609	3.81997	2.56707	2.85112
Adprhl1	0	0.0313647	0	0	0.17322	0.0375568	0.0307789	0.0475108
Adprhl2	6.16804	5.90461	4.68674	6.56399	6.29705	6.37372	4.7953	4.71443
Adprm	5.85035	6.52769	5.72093	5.64465	5.68331	6.66693	6.82025	6.22365
Adra1a	0	0.135738	0.0374511	0	0	0	0	0
Adra1b	10.402	9.01508	10.2299	16.2072	12.0744	11.31	14.6805	8.20539
Adra1d	0.0293317	0.0329202	0.0181658	0.0130794	0	0.0985484	0	0
Adra2a	0.0616584	0.0173004	0.0190932	0.0274942	0	0.0207159	0.0169773	0.0786192
Adra2b	1.41894	1.32911	1.03075	1.31302	1.34903	1.50547	1.62154	1.70496
Adra2c	0	0	0	0.0903889	0.0314113	0	0	0
Adrb1	0.123273	0.380473	0.190864	0.274844	0.0382048	0.0828341	0.13577	0.209576
Adrb2	0.317006	0.592982	0.28795	0.603124	0.576382	0.397628	0.512077	0.323366
Adrb3	0	0	0.0493587	0.0177691	0.0988	0	0.0219443	0
Adrbk1	6.8904	7.39367	5.55752	6.62139	5.80497	8.85334	6.60845	6.75015
Adrbk2	0.372886	0.484585	0.121546	0.175026	0.243295	0.158251	0.280997	0.200193
Adrm1	27.8381	29.9223	27.1141	29.4043	25.8641	35.6267	25.1734	28.0784
Adsl	6.45875	7.07514	6.68502	7.53544	6.25188	7.60987	5.99289	6.76883
Adss	22.2598	22.1203	19.8628	21.0651	21.4816	18.0086	22.6436	19.6303
Adtrp	232.766	221.84	253.702	192.669	193.509	181.798	205.082	228.242
Aebp1	0.489475	0.511031	0.620387	0.730928	0.66324	1.30033	0.727154	0.483813
Aebp2	3.80967	3.84308	3.28633	3.1751	2.16461	1.88948	2.99706	5.01184
Aen	3.96313	3.87668	3.40021	3.8911	4.12423	5.22838	3.88436	3.92519
Aes	86.0322	82.7173	77.0463	121.687	86.4022	102.362	93.7309	73.8398
Afap1	0.0694431	0.0974236	0.107519	0.0619311	0.0645656	0.116657	0.0382415	0.236121
Afap1l1	0.766517	1.29749	1.13622	1.08703	0.654262	1.23278	0.816545	1.64497
Aff1	4.38248	3.76437	3.52326	3.34652	3.5377	4.05928	3.09199	4.8516
Aff3	0.113532	0.216617	0.140626	0.151876	0.211116	0.152578	0.187563	0.212318
Aff4	4.23928	4.47841	4.18861	3.09786	4.26491	4.09151	3.98174	4.77573
Afg3l1	6.50318	6.91158	6.60222	7.15347	5.62407	7.27924	5.64257	6.01193
Afg3l2	9.57912	11.2082	9.2903	10.2339	8.07923	10.0799	8.12151	10.459
Afm	567.979	527.314	501.9	410.664	475.484	486.148	470.901	580.885
Afmid	27.4774	30.0284	27.4323	35.0247	23.1707	29.3246	24.733	29.233
Afp	4.39154	4.02601	5.278	6.6115	5.30937	5.05457	6.20157	4.65706
Aga	11.3237	12.9141	11.4923	14.1057	11.4114	12.0763	13.0752	11.613
Agap1	1.20654	1.17509	1.01279	1.29834	0.951828	1.38028	1.40573	1.55963
Agap2	0.194488	0.3175	0.197101	0.126145	0.219185	0.213852	0.155785	0.180354
Agap3	2.66803	2.67041	2.6142	2.41493	2.46829	3.26451	2.16002	2.48799
Agbl4	0	0.0717903	0	0.0570455	0.158592	0	0	0
Agbl5	0.644422	0.501855	0.456121	0.692	0.521717	0.353489	0.651813	0.58133
Ager	0.273652	0.170628	0.0376621	0.135583	0.113081	0.245177	0.167441	0.258465
Agfg1	2.62881	3.45706	2.74637	2.48653	2.63345	3.14036	2.89532	3.20522
Agfg2	8.70769	8.30616	7.58708	11.6697	11.478	12.2526	11.4634	7.60276
Agk	1.86038	1.63123	1.68026	2.79979	1.68166	1.79701	1.79286	1.7132
Agl	3.8914	3.98324	3.42069	4.34569	3.54381	4.01814	4.58126	4.72417
Agmat	33.8611	30.8684	34.4884	44.9031	57.4866	50.0754	56.0531	31.0378
Agmo	73.7176	73.4129	75.3549	71.9261	76.3842	74.5645	67.2524	77.5538
Agpat1	1.68862	1.62224	1.73301	1.63893	1.63302	1.64859	1.62355	1.92196
Agpat2	53.6509	53.4469	50.9979	53.9929	45.3781	42.9602	48.5674	49.328
Agpat3	8.97618	9.68685	8.73072	9.87177	8.1228	10.1977	7.45422	8.8041
Agpat4	0.279609	0.57533	0.490643	0.561065	0.404398	0.81417	0.590247	0.594205
Agpat5	1.66813	2.27056	1.27491	1.31359	1.38597	1.33556	1.58316	2.38345
Agpat6	24.566	27.1392	24.7211	15.9224	14.2381	18.781	15.1795	31.4522
Agpat9	1.04301	1.87786	1.6149	0.426334	0.727314	0.963681	0.382916	0.849671
Agphd1	4.06933	2.8061	3.03282	4.45952	2.92848	2.57221	5.01361	3.13668
Agps	1.35186	1.07374	0.66979	0.593537	0.876612	0.810565	0.755906	1.73256
Agr2	0	0	0	0.0413151	0.11486	0.373553	0.0510229	0
Agr3	0.0403894	0.0453307	0.0500282	0	0	0	0	0
Agrn	3.20945	3.30247	2.72618	3.15855	2.43429	2.6868	2.78995	2.77358
Agrp	0	0	0	0.0594224	0	0	0	0.113278
Agt	470.318	485.236	453.503	496.791	458.31	551.84	456.379	429.911
Agtpbp1	0.259924	0.334942	0.298106	0.257563	0.286421	0.349316	0.201452	0.196399
Agtr1a	32.9207	32.2687	32.5042	35.1397	35.128	22.4665	36.7804	33.2586
Agtr1b	0.5741	0.599899	0.53946	0.670892	0.490829	0.319259	0.675907	0.572155
Agtr2	0	0.0443759	0.097949	0.0352616	0.0490155	0	0.043547	0
Agtrap	3.1441	3.25904	3.05105	3.51838	2.28399	3.12195	2.64675	3.50678
Agxt	79.45	75.9036	78.2978	68.221	63.3547	62.2098	74.6372	73.9867
Agxt2	44.5044	40.601	39.5385	44.2675	42.3343	39.6314	41.9749	41.9452
Agxt2l2	11.0906	11.894	10.3234	16.9767	10.0071	10.8379	11.1824	11.774
Ahctf1	3.7535	3.51061	3.42707	3.0798	3.71347	3.77311	3.80911	4.33213
Ahcy	231.309	223.544	238.855	281.856	271.687	276.657	241.142	215.618
Ahcyl1	13.5122	13.9662	14.2925	13.9114	12.5437	13.4801	13.0824	14.5526
Ahcyl2	1.44581	1.56473	1.07664	1.18196	1.18423	1.54981	1.18481	1.71184
Ahdc1	3.5004	3.10785	2.67357	3.02676	2.52617	2.72903	2.4242	2.86084
Ahi1	0.604825	0.817669	0.629979	0.711025	0.766832	0.498785	0.635862	0.817939
Ahnak	0.54808	0.732567	0.752937	0.677643	0.642385	1.26557	0.921928	0.635314
Ahr	4.90601	4.27631	4.88651	11.0961	8.6108	8.38319	11.5495	4.47132
Ahrr	0.0551891	0.020647	0.0683598	0.0164063	0.0114028	0.0247232	0.0202613	0.0312757
Ahsa2	2.19509	2.92286	2.36552	3.0558	3.90435	3.90287	3.60672	2.33396
Ahsg	5177.8	4655.99	4885.34	6920.67	6031	6315.29	5790.71	4898.61
Ahsp	0.775158	0.434995	0.288044	0.276522	0.288285	0.625048	2.6466	0.26357
Aida	2.57961	3.14853	2.99553	2.51624	2.55832	2.90343	2.55701	2.54914
Aif1	17.4151	27.0689	15.8731	18.11	18.4934	21.5497	22.3653	18.0997
Aif1l	0.0562557	0.0473536	0.104521	0.0627128	0.104609	0.0189007	0	0.0717304
Aifm1	25.0914	23.081	24.2696	30.764	24.3668	26.1378	24.4482	25.0186
Aifm2	4.58141	4.74528	5.19012	3.84944	3.84891	3.96899	4.17013	4.87072
Aifm3	0.208581	0.117049	0.193769	0.248024	0.129287	0.186877	0.172295	0.265957
Aig1	3.80687	3.91656	4.75466	2.60288	2.51697	3.36811	3.07472	3.39784
Aimp1	6.39649	10.4464	7.71983	8.11801	7.42131	10.525	8.94166	9.89876
Aimp2	4.85831	5.54063	5.82361	4.6123	4.75993	6.00261	5.13507	4.92914
Aip	6.0482	5.99803	5.27174	6.93888	5.68615	6.29534	4.97262	4.34392
Aipl1	0	0.0342705	0	0	0.0378535	0	0.0336304	0
Aire	0.0228325	0	0	0.0407252	0	0	0	0
Ajap1	0	0.0201491	0.0889483	0.0160107	0	0.0723808	0.0197727	0.0305215
Ajuba	1.64214	1.06387	1.32295	1.52403	1.12545	1.32773	1.07341	1.56614
Ak1	0.0743564	0.194724	0.245603	0.15473	0.307261	0.133238	0.0272981	0.252827
Ak2	40.4613	45.8285	45.1373	54.5535	39.6568	50.8794	43.7575	38.8509
Ak3	33.0991	32.0451	32.423	47.712	42.4543	44.4273	44.1696	32.3145
Ak4	44.7707	46.4543	31.7563	43.6246	30.4388	36.4265	28.518	48.0326
Ak7	0.242819	0.23846	0.263171	0.311294	0.188137	0.448702	0.167147	0.180608
Ak8	0	0.0312434	0	0.0248264	0.0345099	0	0.0306598	0.094654
Akap1	14.3701	15.572	14.7715	12.1233	11.1596	13.2965	11.0242	15.5289
Akap10	1.48454	1.58215	1.3907	1.37957	1.17535	1.54242	1.29154	1.29375
Akap11	3.31743	3.27008	2.68555	1.97792	3.02666	3.28949	2.43583	3.58043
Akap12	0.430961	0.581381	0.29389	0.340105	0.357733	0.509964	0.324561	0.357437
Akap13	2.60893	2.76962	2.24328	2.69823	2.48587	2.78977	2.9123	2.51483
Akap14	0	0.0261655	0	0.0415828	0.0289011	0	0.0256768	0.0396351
Akap17a	7.71375	8.23136	6.86136	7.44874	8.0651	8.60407	6.93724	6.42506
Akap2	5.32808	4.86836	4.70513	3.91318	2.90626	3.3191	2.02972	6.92693
Akap3	0.075483	0.0677741	0.056098	0.0134635	0.056145	0	0.0665082	0.0769974
Akap4	0.0501079	0.0562381	0.0413773	0.0297916	0.0414119	0	0	0.0567924
Akap5	0.159912	0.0897379	0.0990373	0.114091	0.118944	0.150436	0.264185	0.135934
Akap6	0.215294	0.186717	0.175762	0.318553	0.194107	0.164396	0.317957	0.274517
Akap7	1.11663	0.835491	1.12698	1.0696	0.820305	0.611377	1.18428	0.984347
Akap8	5.10565	5.50277	4.86468	3.83023	4.66458	5.53351	4.81394	5.10469
Akap8l	12.3064	10.429	12.7714	12.5324	10.5916	12.0688	14.7903	11.3093
Akap9	2.89082	3.10796	3.18186	2.75041	2.86519	2.77433	2.82136	3.81376
Akip1	1.11391	1.46762	1.1098	1.16618	1.77115	2.11533	1.20017	0.782209
Akirin1	5.41928	5.99349	5.36516	3.66889	4.11919	5.76797	4.02995	6.96045
Akirin2	7.76006	7.92362	8.27497	6.60841	7.66708	7.44919	8.16118	7.34042
Akna	0.492014	0.715154	0.58945	0.532304	0.369965	0.552828	0.666262	0.65821
Aknad1	1.71822	1.06054	1.58071	1.99915	1.40249	1.17312	1.46027	1.11232
Akp3	0	0	0	0.0228928	0	0.0689956	0.0565438	0
Akr1a1	105.866	113.515	102.393	164.882	116.336	148.212	142.66	109.518
Akr1b1	2.86982	2.96758	2.11684	2.81819	2.75819	3.59679	2.5215	3.12475
Akr1b10	0.0911533	0.102305	0.0752711	0.270976	0.0753341	0.367507	0.0669294	0.0516567
Akr1b7	0.135243	0.113841	0.125639	1.29659	0.502975	0.0908775	0.89372	0
Akr1b8	0.565248	0.585601	0.592429	1.08576	0.862435	2.16207	0.574663	0.960981
Akr1c1	13.2597	11.5612	11.8543	13.5845	14.1737	15.8072	11.1843	12.9792
Akr1c12	55.8192	52.7273	63.1205	57.3188	61.8199	66.7338	79.1651	60.8308
Akr1c12l1	37.7037	33.7016	39.1748	37.7768	38.4146	40.2118	46.7314	40.7197
Akr1c13	155.044	144.299	168.187	180.486	157.447	170.398	187.043	161.912
Akr1c14	240.116	234.286	242.288	332.806	376.233	369.066	408.793	221.266
Akr1c19	4.62034	5.04254	3.82847	3.75111	5.76726	4.92465	5.3344	4.17131
Akr1c2	279.551	276.616	304.023	243.652	380.416	284.158	284.307	259.584
Akr1c3	10.1234	9.63549	11.7417	17.259	11.5741	11.1532	14.7742	11.5549
Akr1cl	4.17835	4.24291	4.60044	5.76698	4.43985	6.68494	4.93065	5.18678
Akr1d1	195.047	165.225	156.691	285.288	254.887	190.657	263.913	164.484
Akr1e2	22.4568	23.9404	26.0626	30.7873	21.7769	26.2886	29.1628	24.0122
Akr7a2	46.9972	42.8446	41.3041	66.5408	46.5921	51.3498	47.5916	37.4403
Akr7a3	8.79326	6.2838	6.38188	6.37167	5.45043	11.5866	8.51194	6.01482
Akt1	14.4638	15.5695	13.6864	13.6185	12.4314	15.3192	12.14	15.5401
Akt1s1	10.644	10.6903	10.3783	11.5858	11.8418	12.6907	10.701	11.6927
Akt2	17.8233	16.3157	16.3621	26.5309	15.4855	16.3781	15.0522	18.536
Akt3	0.400351	0.138255	0.267019	0.302113	0.381775	0.372487	0.305264	0.31414
Aktip	2.1006	2.4144	2.69595	2.70849	2.29034	2.78902	2.42505	2.7107
Alad	89.6684	89.513	86.0784	150.879	101.035	115.863	132.088	89.9601
Alas1	45.8776	50.3438	48.0253	45.7938	18.8547	17.6333	29.7771	44.2277
Alas2	7.97139	4.00763	2.46065	5.4047	5.11245	5.81267	16.8389	5.21567
Alb	27062	24761.4	26436.3	27016.4	27882.1	33698.4	24082.5	26208.1
Alcam	10.7941	11.0839	8.615	10.8079	11.6083	9.12461	10.1308	11.3638
Aldh16a1	10.4323	10.7455	9.00367	12.7102	11.0554	12.4824	12.6945	8.95382
Aldh18a1	0.225007	0.210445	0.0929012	0.200667	0.294433	0.268791	0.316655	0.233771
Aldh1a1	17.5145	21.8852	20.8234	21.1339	17.6109	30.3465	19.4267	11.32
Aldh1a2	0.153926	0.0431894	0.19066	0.137275	0.0954098	0.310296	0.296679	0.163556
Aldh1a3	1.01171	0.768122	0.884578	0.663434	1.03287	1.35965	1.21259	1.31531
Aldh1a7	0.116756	0.0262079	0.0289238	0.104126	0.0578961	0.188292	0	0.0793988
Aldh1b1	7.0552	4.27899	4.35728	5.87137	2.31446	2.48265	2.87874	3.9091
Aldh1l1	54.8608	47.952	39.5861	46.4684	38.4604	38.0337	39.9739	40.7161
Aldh1l2	27.1071	28.4838	23.3738	31.9306	21.2856	22.4197	26.7852	24.1916
Aldh2	367.159	351.44	303.12	392.504	342.252	394.677	312.558	290.028
Aldh3a1	0.0251757	0	0.0311838	0	0.0312099	0.067668	0.110912	0.0428013
Aldh3a2	153.793	146.434	145.009	116.241	85.4205	84.9621	112.789	153.49
Aldh3b1	0.417162	0.728308	0.430597	0.578722	0.287305	0.186877	0.587079	0.630417
Aldh4a1	153.588	122.179	103.274	141.899	119.869	107.772	117.58	121.462
Aldh6a1	173.297	151.216	153.432	162.356	164.804	139.301	163.046	165.254
Aldh7a1	143.161	131.815	124.523	145.382	136.893	126.161	133.973	128.283
Aldh8a1	109.007	99.9578	106.032	86.3422	80.3588	105.708	94.821	107.019
Aldh9a1	84.0257	75.8796	75.1879	89.5117	59.4543	61.0035	69.7639	85.994
Aldoa	20.3826	27.1347	20.4237	24.3957	21.0046	26.2492	24.7597	21.8159
Aldoart1	0.587259	0.573134	0.569274	0.47819	0.506445	0.960797	0.59055	0.520905
Aldob	829.582	832.543	886.839	1206.47	889.363	1051.14	964.432	880.615
Aldoc	0.218476	0.122602	0.10148	0.146132	0.270841	0.183508	0.180468	0.232145
Alg1	4.00906	3.80823	3.24835	4.28359	3.34402	3.8134	3.69321	3.61684
Alg10	3.44438	2.72877	2.78569	2.49356	2.58708	2.72291	2.90096	3.82349
Alg11	12.7968	13.4574	12.0169	11.4821	13.478	15.3452	14.2087	13.5311
Alg12	3.1324	3.96694	3.25075	3.9827	3.43714	3.24259	3.03036	4.60575
Alg13	3.37737	3.45699	3.54749	4.93972	3.9524	3.59481	3.74951	3.21545
Alg14	7.20081	6.41409	6.3709	5.98864	7.93486	6.79714	6.86078	7.2384
Alg2	4.59595	4.67765	3.04085	2.67312	2.21177	2.62792	2.38946	5.04729
Alg3	6.71415	7.42829	7.23841	8.56663	6.17642	6.95944	6.91163	7.37285
Alg5	8.79292	7.7588	7.58637	9.35602	9.28416	10.1463	9.04983	9.79409
Alg6	1.64112	1.18886	1.62621	1.67647	1.49811	1.06266	2.10326	1.47113
Alg8	2.39385	2.32034	2.64166	2.83358	2.45502	2.45672	2.42081	2.47887
Alg9	3.12558	3.00416	3.10955	3.27676	3.27703	3.06102	3.31427	2.93956
Alk	0.0181375	0.0203564	0	0.0485264	0.0337271	0.0243752	0.0199762	0.0154178
Alkbh1	2.66629	2.33117	2.57274	2.11512	2.48358	2.51423	2.23895	2.62963
Alkbh2	2.28182	1.88072	2.07561	2.63912	2.25415	1.91661	1.96339	1.51536
Alkbh3	9.89528	8.64644	8.60941	11.8784	9.08353	9.84727	10.2196	10.1869
Alkbh4	0.670513	0.671915	0.949176	0.619337	0.979657	1.09421	0.817612	0.773532
Alkbh5	12.4485	12.0387	9.96468	11.0142	10.522	10.1172	9.91711	14.3044
Alkbh6	2.50163	2.54771	2.63958	2.52022	2.64179	2.61487	3.21444	2.52031
Alkbh7	4.53111	3.12951	2.64433	5.09006	4.4289	3.33748	3.8868	2.74062
Alkbh8	1.1726	1.02142	1.04055	0.593116	0.71598	0.705617	0.790307	1.27944
Allc	0	0.0328755	0.108847	0	0.0726254	0	0.0322614	0.199197
Alms1	0.64604	0.666681	0.574651	0.456284	0.602007	0.506949	0.66378	0.597081
Alox12	0.0912818	0.136599	0.0753772	0.0542716	0.0943004	0.184012	0.167559	0.0258647
Alox12b	0.0190372	0	0.0235803	0.0169778	0.0236	0.0255843	0.0629013	0
Alox12e	0.0878996	0.0197307	0.0217753	0.0156782	0.0217935	0.141756	0.174259	0
Alox15	1.02566	0.708393	0.488626	0.826755	0.733553	1.06031	4.97475	1.006
Alox15b	0	0.0235007	0	0	0	0.0562806	0	0
Alox5	0.13631	0.0191233	0.021105	0.0759781	0.147859	0.297683	0.0187661	0.202774
Alox5ap	0.967665	1.44807	0.684911	0.945177	0.628361	1.30046	1.67477	0.940075
Aloxe3	0.102597	0.115149	0.169442	0.121998	0.10599	0.0689409	0.150664	0.0872129
Alpi	0.058189	0.0217693	0.0240252	0	0.0240453	0.0260671	0.0213627	0.0329758
Alpk3	0.0683304	0.0287587	0.031739	0.0533214	0.021177	0.0344364	0.0188144	0.0435633
Alpl	2.82947	3.49721	2.48435	1.59708	2.48643	3.89884	1.65677	3.22723
Als2	6.93478	5.83261	5.32902	5.40204	4.47801	4.80872	4.71968	8.12544
Als2cr11	0	0.0257211	0	0.0817531	0.0568205	0	0	0.0389619
Als2cr12	0.350457	0.340888	0.260455	0.333383	0.173782	0.156995	0.308788	0.198604
Als2cr8	0.605493	0.50532	0.576916	0.48461	0.519659	0.438163	0.393286	0.475108
Alx1	0	0	0	0.0437068	0	0	0.0269883	0
Alx3	0.0841096	0	0	0	0	0	0	0
Alx4	0	0	0.0612953	0.0441326	0	0	0	0
Amacr	170.219	152.591	161.573	126.679	185.938	146.81	188.42	164.248
Ambn	0	0.025491	0	0	0	0.0915707	0.0500298	0
Ambp	1703.78	1746.88	1799.88	2460.66	1935.22	2222.75	1942	1579.38
Ambra1	3.74585	3.02808	3.08638	3.27442	2.85371	3.04929	2.88064	4.29231
Amd1	15.437	16.6845	14.3753	9.84076	10.7602	17.0387	11.9075	17.7174
Amdhd1	37.7541	35.5738	34.7414	32.8045	28.5881	16.373	28.532	30.1583
Amdhd2	3.13849	2.69945	2.79753	2.74667	4.03618	4.41497	3.55358	2.39361
Amelx	0.119319	0	0	0.103937	0	0	0.12852	0.298216
Amh	0.0779355	0.0583135	0.0643564	0.0926731	0	0.0349129	0.0286121	0.0441662
Amhr2	0.605275	0.176121	0.249907	0.0399851	0.472442	0.210891	0.197522	0.495459
Amigo1	1.13622	1.6676	1.26303	1.01331	1.0835	1.87936	1.2514	1.43638
Amigo2	1.24078	1.17352	0.94976	0.969791	1.2098	1.16163	1.18231	1.09028
Amigo3	0.706881	0.825095	0.70046	0.453898	0.630942	0.79799	0.467125	0.817204
Ammecr1l	11.0571	9.99144	10.6008	13.4066	14.1588	14.1664	12.8354	12.6583
Amn	0.0245599	0.0275646	0.060842	0	0.0304465	0	0	0
Amn1	1.73678	1.67636	1.8931	1.92064	1.85163	1.54049	1.53028	1.59446
Amotl2	8.04928	7.48936	8.27838	9.6241	6.38524	7.23039	7.09683	7.67544
Ampd1	0.0189869	0.106549	0.0470362	0.101598	0.0470755	0.0510337	0.0209118	0.0968392
Ampd2	8.37078	8.41503	7.88764	11.0033	7.59185	9.99008	8.49824	7.24656
Ampd3	0.110172	0.12365	0.109171	0.117905	0.0546312	0.177674	0.145609	0.149843
Amph	0.0211545	0.0237425	0	0	0.0262248	0	0.0465981	0
Amt	17.2878	15.1584	16.1136	20.6404	15.6449	17.3669	18.85	15.9814
Amtn	0	0.0967235	0	0	0	0	0.0949169	0
Amy1a	132.532	136.18	153.164	181.181	162.077	178.501	155.339	132.522
Amy2	3.8129	4.34094	4.14522	4.67255	5.57693	4.42378	4.59219	4.75681
Amz1	0.229356	0.193062	0.177557	0.485796	0.31987	0.192647	0.15788	0.146223
Amz2	5.22815	4.68102	4.43849	5.12099	5.13402	5.28938	5.2244	4.46916
Anapc1	1.54357	1.66159	1.20849	1.58005	1.09517	1.36991	1.26167	1.67522
Anapc10	1.24137	1.17554	0.816857	1.34926	1.15418	0.729878	0.897233	0.725468
Anapc11	3.99075	3.40344	3.44718	5.11614	5.15883	6.05128	5.79778	3.48162
Anapc13	18.4276	16.9133	17.3384	35.1164	17.1732	23.8222	21.2193	15.0077
Anapc15	4.94385	3.82242	4.28658	6.4666	6.1969	5.53676	5.38454	4.57609
Anapc2	7.57649	7.75845	6.99834	9.26909	7.46579	8.44162	7.82749	6.82573
Anapc4	3.11742	3.16483	2.79073	2.72965	3.05656	2.95173	3.19936	2.98724
Anapc5	25.1496	26.3406	23.6408	35.2317	26.7172	29.0372	29.3889	23.9402
Anapc7	2.757	2.43793	2.54569	2.44386	2.21639	2.82941	2.13475	2.86913
Ang	3.51236	2.49984	4.03223	2.44481	4.88521	4.02953	4.7176	1.0195
Ang1	278.083	270.726	284.495	305.32	383.962	432.937	381.078	250.211
Angel1	2.69994	2.50603	2.41296	2.96667	2.82453	2.86299	2.84818	2.6534
Angel2	5.00947	5.13106	4.24709	4.91216	4.70284	4.18318	4.84774	5.47792
Angpt1	0.0913784	0.205115	0.141482	0.142614	0.1416	0.153506	0.327087	0.349544
Angpt2	0.152364	0.213756	0.306679	0.203824	0.141663	0.281552	0.167811	0.161897
Angpt4	0.037093	0.0624465	0	0.0496207	0	0.14955	0.0204267	0
Angptl1	0.19836	0.519463	0.245697	0.206386	0.245903	0.0888595	0.327703	0.224821
Angptl2	3.95461	3.71007	3.01438	4.15984	2.86606	4.36075	4.19917	3.55126
Angptl3	87.1122	81.0483	90.2364	85.9494	75.9434	79.1673	75.7561	99.5247
Angptl4	164.917	162.99	163.946	80.2862	78.0837	78.1424	34.7505	167.883
Angptl6	7.88012	6.40735	6.35578	9.09104	7.49717	7.50562	6.9378	6.42634
Ank1	0.0337051	0.0189143	0.0104372	0.0225443	0.0417837	0.0566211	0.0556831	0.0429767
Ank3	0.441601	0.527124	0.46749	0.447201	0.482309	0.459347	0.497867	0.483699
Ankfy1	5.43612	5.14281	4.29778	4.98214	4.92012	5.13176	4.60301	5.61266
Ankh	32.8542	34.5962	27.4722	22.0774	16.2084	19.4208	16.8487	40.4368
Ankhd1	3.92512	4.01081	3.81294	4.06573	3.49922	3.49282	4.45794	4.49099
Ankib1	2.33883	2.35711	2.07772	2.01893	1.96111	1.97022	1.86248	2.39966
Ankle2	6.60745	4.80384	4.51547	3.67205	4.03505	4.768	3.79997	6.00403
Ankmy2	1.74332	1.97834	1.82346	1.79659	1.1046	2.26478	2.00539	1.97589
Ankra2	1.08337	0.682096	0.81824	0.80122	1.01547	1.24289	0.785765	0.943383
Ankrd1	0.0991419	0.278177	0.0921013	0.331564	0.184357	0.233167	0.218385	0.463516
Ankrd10	0.994499	1.60054	1.23183	1.1714	1.18634	1.33652	1.23998	1.49935
Ankrd12	0.646471	0.740469	0.570396	0.548897	0.894735	1.01162	0.751022	0.557062
Ankrd13a	11.5706	13.3188	9.86784	12.0423	9.97897	12.6661	9.89716	11.3875
Ankrd13c	5.29763	4.56302	4.38385	4.91434	4.17925	3.46195	4.45312	5.3506
Ankrd13d	0.142362	0.136953	0.0503817	0.108824	0.151271	0.0819952	0.179193	0.103727
Ankrd16	0.675635	0.649965	0.557915	0.659934	0.319075	0.562093	0.885867	0.546976
Ankrd17	4.89628	4.77476	4.53266	3.43528	3.52305	3.94006	4.00206	5.69741
Ankrd2	0	0	0	0	0	0.051994	0	0
Ankrd22	0.120942	0	0.149804	0.0539295	0	0.162536	0	0
Ankrd23	0.219169	0.189217	0.0835301	0.16539	0.1254	0.0906291	0.148546	0.171974
Ankrd24	1.33061	1.21425	1.03202	1.35302	1.17163	1.63781	1.49289	1.09937
Ankrd27	12.0389	11.2349	9.84826	9.00964	6.63028	7.73854	7.54941	12.9598
Ankrd29	0.0379906	0.0213192	0.0235284	0.0338809	0	0	0.0627629	0.0322939
Ankrd32	0.679307	0.516891	0.513409	0.400459	0.499566	0.510622	0.532598	0.919999
Ankrd33b	1.85627	2.46216	3.37424	5.07389	2.33107	3.27222	2.49582	2.99191
Ankrd34a	0.0452265	0.0338397	0.0186732	0.0268894	0.0373777	0.0405204	0.0332077	0.0768898
Ankrd34b	0.0131155	0.0147201	0.0162455	0.0350902	0	0.0176261	0.0577805	0.0445955
Ankrd34c	0.0522294	0.0195397	0	0.0776324	0.0647479	0.0233973	0	0.0295984
Ankrd37	0.339971	0.699532	1.19313	0.404259	0.772669	1.21838	0.374436	0.674316
Ankrd39	0.514474	0.710665	0.392155	0.423527	0.539664	0.638225	0.130761	0.941941
Ankrd40	6.66017	6.71603	5.7842	6.41761	6.07375	6.79019	5.56475	7.33174
Ankrd42	0.63838	0.768905	0.906443	0.860928	1.10022	0.774228	0.737394	0.450007
Ankrd44	2.35007	2.46715	2.25708	2.47633	2.05279	1.84639	1.9273	1.81943
Ankrd46	10.1378	7.37544	6.74949	10.0906	8.9096	7.49341	11.5843	8.18679
Ankrd49	3.83341	3.39662	3.14883	3.56268	4.70219	4.41968	3.64428	4.01322
Ankrd5	0.0417835	0	0.10351	0	0.0345322	0.0748713	0.0153398	0.0236788
Ankrd50	1.58191	1.48455	1.42806	1.21152	1.44033	1.50138	1.22058	1.76255
Ankrd52	2.6778	2.39001	2.02169	1.61483	1.91273	1.74796	1.34823	3.29517
Ankrd54	1.79145	1.57795	1.79765	2.00213	2.05216	2.22471	1.94809	1.50355
Ankrd55	0.0725164	0.0162776	0.143716	0.103475	0.0539384	0.116947	0.0958415	0.0246571
Ankrd6	0.0558555	0.0208963	0.0345926	0.0332089	0.0923241	0.075065	0.030759	0.0158267
Ankrd61	0.715135	0.802625	0.811983	0.425184	0.369392	0.440495	0.623543	0.911853
Ankrd65	0	0	0.0842871	0	0.0843576	0.0457252	0.0374731	0.115688
Ankrd7	0.102801	0.0576887	0	0.0458401	0.0637201	0.0690777	0.0566111	0.0873859
Ankrd9	2.08007	2.4346	2.1716	2.01406	1.65769	2.35615	1.30911	2.27336
Anks1a	2.12191	2.39876	1.95218	2.30376	1.96334	2.11809	2.01526	2.27427
Anks1b	0	0.00873756	0.028929	0.0208289	0	0.0209251	0.0257231	0
Anks3	1.69886	1.78499	1.4327	1.82132	1.63555	1.72448	1.65213	1.75138
Anks4b	16.2209	12.7438	12.1438	15.0619	16.9151	17.8564	22.6207	12.9775
Anks6	0.0790955	0.144255	0.0979714	0.0793568	0.0612834	0.119585	0.14156	0.0336177
Ankzf1	5.85167	6.04144	5.58628	4.98801	4.58899	5.53966	4.87818	5.33149
Ano1	0.241676	0.187783	0.253297	0.190663	0.230462	0.299808	0.286651	0.237042
Ano4	0.0325941	0.0487755	0.05383	0.0387576	0	0.0292025	0.0119661	0
Ano6	2.08317	2.45359	2.26636	2.74082	2.22898	2.15027	2.65203	1.93913
Ano7	0	0	0	0.0421288	0.0195204	0.0211617	0.0173426	0.0267703
Anp32a	35.5345	37.8329	34.7069	49.5235	34.157	36.059	42.6437	38.8313
Anp32b	17.0353	19.5026	18.704	15.6324	15.6153	19.5797	17.634	18.2543
Anp32e	5.21635	5.64291	4.70968	4.98836	4.05137	6.08125	4.49923	5.76976
Anpep	34.1249	26.7835	29.108	35.9541	23.8444	27.4921	33.4592	30.7104
Antxr1	0.207641	0.203913	0.321492	0.405079	0.193056	0.261611	0.242984	0.4192
Anxa1	1.08874	2.5137	1.46415	1.66451	2.23663	7.65031	3.42603	1.58654
Anxa10	0.0321731	0	0	0.0573855	0.0398844	0.0432379	0	0.0546976
Anxa11	16.6745	17.3595	16.9622	23.1976	16.2983	19.2657	17.8247	15.8417
Anxa13	0.29536	0.421902	0.532141	0.431034	0.29958	1.2269	0.384449	0.410844
Anxa2	1.87302	2.35587	2.40001	2.93761	2.40201	9.37431	3.66342	1.86667
Anxa3	6.84812	9.31454	5.43946	6.5387	6.13832	7.32158	7.3461	6.9682
Anxa4	7.40921	7.2762	7.04692	8.00399	7.90025	10.7871	8.06318	7.08549
Anxa5	4.04968	4.34008	4.7144	5.56676	3.35946	4.25573	4.42669	3.72715
Anxa6	29.7053	25.9922	29.4192	37.9629	34.6841	34.4615	41.3578	27.6839
Anxa7	3.36408	3.04656	2.73004	3.72435	2.9049	4.8952	3.9351	3.15547
Anxa8	0.306884	0.185462	0.204681	0.168423	0.204852	1.93523	0.571992	0.361201
Aoah	0.153017	0.228983	0.157945	0.204697	0.189692	0.102821	0.196618	0.390217
Aoc2-ps1	0.52977	0.957939	0.984297	0.603702	0.474317	0.395537	0.226908	1.10081
Aoc3	0.230361	0.258544	0.461973	0.225008	0.299174	0.781336	0.398694	0.33569
Aox1	51.2939	42.3771	43.275	40.976	41.4439	52.686	46.941	44.1353
Aox3	45.8348	39.3841	33.8579	24.6873	29.7071	19.0921	29.7636	54.6726
Aox3l1	0.253978	0.28505	0.17617	0.163083	0.176317	0.191142	0.23497	0.293617
Aox4	0.0265537	0.00993409	0.0109635	0.00789374	0.0109727	0.0475812	0.0194971	0.045144
Ap1ar	7.74772	9.24671	9.21372	6.71498	8.45486	10.8034	10.5162	8.53393
Ap1b1	10.8059	10.6518	8.71767	11.053	8.37245	11.2102	8.69115	10.2331
Ap1g1	9.51742	8.01502	7.28462	5.60785	6.10272	5.66315	5.56645	11.3822
Ap1m1	11.4106	11.6995	10.4128	12.0955	8.9764	10.0927	8.02432	12.6533
Ap1m2	0.128654	0.0577574	0.159357	0.0917895	0.15949	0.20748	0.0283393	0.08749
Ap1s1	15.7186	15.8551	16.882	23.5115	17.0605	19.6092	20.7452	13.869
Ap1s2	1.00133	0.909767	0.974514	1.25446	1.00488	0.993254	1.1291	0.85118
Ap1s3	0.785023	0.651221	0.549598	0.44137	0.38081	0.550437	0.526282	0.928432
Ap2a1	11.5372	11.5118	10.1893	11.4047	8.39177	10.106	8.76836	12.0839
Ap2a2	20.5321	19.1734	17.5839	18.7164	16.4717	17.677	15.8707	21.5213
Ap2b1	4.59441	4.45822	4.12982	3.99782	3.93551	4.57728	4.26074	4.99034
Ap2m1	25.1762	24.6737	23.8713	31.0785	26.1823	29.2868	27.0412	27.1746
Ap2s1	31.1518	30.9456	30.5502	34.8147	33.6264	39.9112	36.4042	25.1019
Ap3b1	4.59446	4.63436	4.09169	5.88166	4.64305	4.09553	5.20115	5.43808
Ap3d1	14.993	16.6138	14.9691	17.2896	15.7677	15.6203	14.0585	16.68
Ap3m1	8.47129	8.18887	7.76816	7.21372	7.04632	7.67549	7.62961	8.87354
Ap3m2	0.342916	0.769738	0.386138	0.889662	0.772923	0.460851	0.583687	0.529994
Ap3s1	5.00643	5.61892	5.74339	5.1241	7.08111	6.18635	6.06907	5.14115
Ap3s2	9.68174	8.98859	8.02423	14.3484	8.95759	12.3417	10.8201	7.80638
Ap4b1	2.94149	3.13545	2.54493	4.02062	2.96852	3.29757	3.06061	2.66376
Ap4e1	0.726283	0.829191	0.744503	0.558377	0.589892	0.63949	0.648204	0.638667
Ap4m1	1.90204	2.20589	2.19889	1.75283	2.00424	1.87453	1.81555	2.31746
Ap4s1	5.47097	5.53179	4.33458	6.81322	6.78226	5.89526	6.7313	4.94389
Ap5m1	2.57704	2.37526	2.30041	2.31111	2.23095	1.97352	2.2199	2.91267
Ap5s1	2.40717	2.01553	1.70379	2.45346	1.84732	1.48914	0.925818	1.94878
Apaf1	0.882499	0.751102	0.592098	0.564042	0.656412	0.602886	0.680375	0.912707
Apba1	0.211648	0.382706	0.174772	0.167781	0.102035	0.237031	0.103602	0.279863
Apba2	0.0797493	0	0.0592687	0.12802	0.0790911	0.0428705	0.140534	0
Apba3	25.6593	24.4944	20.4525	30.3102	19.0415	24.6961	20.1391	24.1444
Apbb1	0.510559	0.515719	0.569162	0.607106	0.379759	0.411689	0.356135	0.260401
Apbb1ip	0.642091	0.798552	0.580371	0.851211	0.60237	0.699662	1.01299	0.649072
Apbb3	10.7406	10.3977	9.11654	15.055	9.33636	10.7252	9.89713	9.89392
Apc	2.03757	1.81253	1.73863	1.53	1.27856	1.4672	1.57366	2.27517
Apc2	0.0900068	0.0858656	0.0557433	0.100338	0.066948	0.078625	0.0793052	0.130068
Apcs	907.896	945.611	968.325	1120.36	1468.47	1174.86	1241.03	842.385
Apeh	12.984	12.2532	12.481	16.4885	12.6048	14.7705	13.8571	11.721
Apex1	6.05109	6.51173	5.90795	5.30128	4.2361	7.31893	4.31234	6.233
Aph1a	20.2647	17.4441	16.8912	21.7739	17.6141	18.6113	19.4738	18.18
Aph1b	3.37051	4.61509	4.50886	4.71928	4.51264	3.48786	3.34099	3.20892
Api5	19.0695	19.9487	16.8314	18.8678	18.5999	18.2296	18.2948	21.1037
Apip	2.58119	1.94887	2.49962	3.1809	2.44353	2.3967	2.2226	2.55319
Apitd1	0.930287	1.16693	0.677822	0.683244	0.474872	0.5148	0.602704	0.744275
Aplf	0.755417	0.810154	0.727762	0.464104	0.707561	0.947536	0.758043	0.599334
Apln	0.126083	0.2044	0.173524	0.124937	0.0347339	0.112963	0.0617175	0.0952682
Aplnr	0.0236842	0.0265817	0.0733408	0	0.0440413	0.0318296	0.0782557	0.0201328
Aplp1	1.64145	2.09878	2.05891	2.22362	2.31821	3.63007	2.40284	1.83687
Aplp2	68.1481	66.1261	65.0424	65.2663	60.6903	74.0571	63.9698	63.7936
Apmap	52.5905	50.4454	51.7	46.7344	35.58	33.8131	36.2672	53.4331
Apoa1	988.392	1125.88	1135.84	1872.31	1606.17	2047.53	1663.51	1032.78
Apoa1bp	12.3724	9.70121	11.1264	14.0948	12.4489	13.097	13.6733	11.8138
Apoa2	1211.65	1160.66	1228.1	1220.43	1224.59	1715.05	1098.68	1007.93
Apoa4	688.571	854.124	855.387	724.101	520.083	564.04	605.208	649.977
Apoa5	401.593	362.76	413.348	534.832	552.631	560.369	502.745	371.788
Apob	358.463	324.97	322.621	290.777	417.179	322.855	397.583	371.443
Apobec1	3.35514	2.70059	3.73605	4.56386	4.83153	2.96047	3.54597	3.22656
Apobec2	0.144161	0.364045	0	0.0642833	0.31275	0.145305	0.119082	0
Apobec3b	0.0983514	0.13798	0.152278	0.241209	0.335293	0.132176	0.108322	0.167208
Apobec4	0	0	0	0.0557246	0	0.0419864	0.0344091	0
Apobr	0.124034	0.348021	0.44554	0.420344	0.322902	0.433398	0.573755	0.295219
Apoc1	3084.37	3385.79	3412.51	3304.35	3403.36	3875.98	3309.38	2823.09
Apoc2	551.295	592.915	649.874	686.723	663.346	727.111	695.456	532.436
Apoc3	2792.14	2900.23	3098.45	2942.06	2592.98	3290.65	2727.35	2635.42
Apoc4	277.614	294.772	278.552	415.616	427.971	457.659	403.596	222.399
Apod	0.0509154	0	0	0	0	0	0.0560771	0
Apoe	5416.28	5738.72	5707.48	6989.37	5971.15	8800.49	6333.64	5107.52
Apof	159.55	169.038	160.173	217.31	176.793	179.307	176.321	158.573
Apoh	1509.93	1458.24	1651.53	1734.4	1959.29	1972.66	1912.81	1608.48
Apol3	34.5712	28.9734	30.6669	33.6319	26.725	22.6826	27.2684	32.3389
Apol9a	27.3982	27.2888	22.9542	13.089	8.02191	13.9142	7.97611	27.3393
Apold1	0.434309	0.504251	0.463754	0.641094	0.575537	0.563548	0.428854	0.534682
Apom	124.025	128.246	152.991	242.115	175.767	251.926	188.901	134.751
Apon	62.7067	63.7241	63.2431	90.8834	70.3865	75.7422	63.8014	65.5775
Apoo	4.03108	3.32505	4.51182	5.63075	4.39518	3.45932	4.11879	3.38534
Apool	7.55814	6.90302	7.42885	9.68782	8.07995	6.66201	8.29066	7.33521
Apopt1	11.9525	10.8736	14.0222	17.8911	14.5562	19.1766	19.9492	10.8316
App	14.6135	17.2504	16.0669	18.2984	16.0117	20.8048	16.4811	18.6334
Appbp2	3.94971	3.66627	2.78961	2.70819	3.41238	3.19939	3.16575	3.7024
Appl2	3.33582	3.00822	3.08539	3.63751	3.50332	3.34761	3.24082	3.16995
Aprt	18.4473	15.7066	19.1071	27.9397	21.4888	27.7837	23.9956	15.9515
Aptx	1.61606	1.30044	1.39743	1.65879	1.4742	2.25381	1.47765	3.05851
Aqp1	2.74788	3.17639	2.77184	3.155	3.05973	5.55044	3.47951	2.46172
Aqp11	8.2735	6.91727	6.26494	7.10966	6.06256	5.40189	6.82496	7.74474
Aqp12a	0.0790051	0	0.0978594	0.387523	0	0	0.0870144	0
Aqp2	0	0	0	0.0551263	0.0383142	0	0	0
Aqp3	0.0960006	0.080809	0.0594554	0.0856158	0.0595052	0.0322542	0.0528664	0.0408028
Aqp4	0.0265705	0.00994039	0.0109705	0.00789875	0.0219594	0.0357085	0.0292642	0.0602302
Aqp5	0.518359	0.65022	0.415453	0.326319	0.340201	0.163913	0.167914	0.0518391
Aqp6	0	0.0370195	0	0.0882483	0	0	0	0
Aqp7	0.0681551	0	0.0844201	0.0911737	0.126736	0.0457974	0	0
Aqp8	46.5997	41.2709	37.9077	60.8511	53.0859	51.5604	54.8018	39.9383
Aqp9	59.8734	53.4539	56.9687	84.4793	86.1324	71.7797	109.841	47.6678
Aqr	3.20188	3.31332	2.96069	2.41009	2.79731	2.94861	2.60311	3.69978
Ar	0.678544	0.855288	0.517216	0.381705	0.401178	0.40685	0.655353	0.905129
Araf	23.821	23.0363	23.4833	28.8575	21.9512	22.4003	25.42	23.4233
Arap2	0.397137	0.501439	0.43811	0.50913	0.446169	0.542058	0.560416	0.474732
Arc	0.0285369	0.0320281	0.0530206	0.0508998	0.0884417	0.0958778	0.0314298	0
Arcn1	38.9499	38.6208	35.2817	36.5653	35.5593	35.0874	35.5721	45.7899
Areg	0	0	0	0.100537	0.0465839	0.101001	0	0.0638852
Arf1	44.186	43.5479	43.5345	52.7416	37.1336	49.6898	45.3822	51.7426
Arf2	1.68425	1.33433	1.20263	1.55507	1.08081	1.57113	1.44035	1.78542
Arf3	12.5012	12.6894	12.4104	13.8658	12.0626	14.4004	13.0743	12.6805
Arf4	39.7825	40.9917	36.8322	37.4728	35.661	32.7591	34.6786	44.418
Arf5	74.956	75.278	74.4269	84.1515	67.5518	81.5757	91.1927	67.154
Arf6	20.5923	20.3703	17.2682	17.594	14.0683	18.1297	14.7337	19.9322
Arfgap1	11.2068	11.1165	10.1949	11.8399	9.33875	11.3426	10.115	10.9494
Arfgap2	26.4124	26.1511	24.929	28.7851	22.2164	25.2823	24.5259	26.0809
Arfgap3	6.66836	6.19379	6.2441	8.70755	5.52572	5.22964	6.44824	8.41998
Arfgef2	4.82897	4.86517	4.1267	4.13968	3.63825	4.26612	4.0899	4.93858
Arfip1	4.25966	5.00709	3.65276	3.32682	2.59344	3.79383	3.38675	5.78492
Arfip2	7.0055	7.56225	7.9241	6.68155	5.69927	8.0745	6.10826	7.81599
Arfrp1	3.21724	3.55851	3.6385	5.0731	4.56638	4.76233	3.49204	2.77445
Arg1	340.476	393.142	403.215	406.293	424.429	483.21	369.368	366.045
Arg2	0.0904531	0.0676794	0.0373465	0.0806683	0.0373777	0.0405204	0.132831	0.0512599
Arglu1	10.6245	12.4881	9.70669	8.46722	10.2753	11.8143	10.4014	10.3765
Arhgap1	6.51321	6.56893	6.39457	6.61168	6.3069	6.55482	6.23136	6.40405
Arhgap10	0.131937	0.351685	0.245134	0.308869	0.286229	0.288132	0.326952	0.252344
Arhgap11a	0.227788	0.185932	0.23085	0.249317	0.333728	0.250469	0.159652	0.211235
Arhgap12	5.81745	4.99347	5.00795	5.84159	6.29254	4.98275	7.42809	5.58298
Arhgap15	0.33691	0.407214	0.224706	0.277352	0.224895	0.208975	0.342521	0.264361
Arhgap17	3.08102	2.71043	2.63877	2.50901	2.34411	2.58154	2.60933	2.89582
Arhgap18	2.05781	1.84341	1.4966	2.6097	1.96593	2.05511	2.47435	1.54062
Arhgap20	0.0222157	0.0124668	0.0275174	0.0198125	0.0688512	0.0298561	0.0611697	0.0755381
Arhgap21	2.05132	2.25062	2.03594	2.17536	1.89909	2.96886	2.23031	2.85032
Arhgap22	0.124189	0.301994	0.076913	0.239968	0.359228	0.333798	0.364743	0.211134
Arhgap24	3.2129	3.12635	2.88181	3.16176	2.17788	2.361	4.07899	2.90603
Arhgap25	0.873143	1.40603	0.98747	1.15111	0.847112	1.03738	1.05922	1.09719
Arhgap26	0.553542	0.51476	0.195898	0.493663	0.294093	0.446348	0.557402	0.457095
Arhgap27	0.56245	0.891191	0.758148	0.575372	0.389645	0.622493	0.510151	0.618732
Arhgap28	0.0972712	0.095525	0.120485	0.140967	0.0301464	0.0817027	0.133915	0.103357
Arhgap29	9.51775	8.13423	7.47217	7.88934	9.10359	9.33905	10.7761	10.4371
Arhgap30	1.07	1.76837	1.04863	0.84939	0.757978	0.884917	1.39863	0.979522
Arhgap31	0.491714	0.88087	0.726187	0.556587	0.445455	0.711655	0.499904	0.980651
Arhgap35	8.43496	7.21895	7.09744	7.72968	7.10338	7.50638	7.8687	9.00438
Arhgap39	0.627236	0.788028	0.487026	0.801506	0.684729	0.629068	0.618647	0.923122
Arhgap4	1.45948	1.91104	1.27214	1.04851	1.03867	1.05335	1.19069	1.40146
Arhgap5	5.56741	5.17253	4.30645	3.20366	3.85185	3.53926	4.05819	6.61776
Arhgap8	6.06232	5.07904	7.93212	7.23409	8.36216	7.1145	9.18466	5.95169
Arhgap9	1.8275	2.35754	1.99277	2.16771	2.43871	2.2111	2.41212	1.43207
Arhgdia	41.1868	45.4813	39.8094	52.7209	42.8963	56.6566	49.1185	42.9231
Arhgdib	9.28481	12.0503	8.37698	10.2909	9.56817	8.72947	10.9415	8.6396
Arhgdig	0.0829515	0.0930999	0	0.0369891	0	0	0	0.0705131
Arhgef1	9.28037	10.7225	9.1419	9.92201	8.28543	9.53312	9.16746	8.50456
Arhgef11	4.40083	4.14099	3.83199	4.70092	3.30382	3.81865	3.64226	4.1237
Arhgef12	12.482	12.1397	11.2118	9.15118	10.3486	9.77969	9.43424	13.0459
Arhgef15	0.827358	0.994905	0.863764	0.758941	0.791225	0.873635	0.728987	0.743486
Arhgef18	3.48593	3.53302	2.90473	3.27842	2.47938	2.76356	2.54404	3.40022
Arhgef19	4.27265	3.62642	3.07863	5.26709	2.8171	2.68812	3.92367	2.61583
Arhgef2	2.11345	2.19845	2.24749	2.0871	1.22693	1.59334	1.72591	1.94553
Arhgef25	0.225624	0.253227	0.508125	0.43902	0.279703	0.523744	0.406632	0.174357
Arhgef28	0.0487868	0.0156444	0.043164	0.0124312	0.01728	0.0842982	0.0383804	0
Arhgef3	0.716222	1.25936	0.739289	1.7459	2.3825	1.49194	1.59081	1.035
Arhgef37	1.19666	0.942308	0.824794	0.714343	0.418724	0.324236	0.648358	0.885969
Arhgef39	1.25265	1.13668	1.94773	1.66383	1.85024	1.46854	1.35028	1.6312
Arhgef40	1.61174	1.36119	1.44557	1.45585	1.44922	1.62053	1.7842	1.44823
Arhgef6	0.499592	0.582278	0.476014	0.359866	0.190565	0.413175	0.253957	0.490014
Arhgef7	4.55937	4.77209	4.00097	5.47163	4.25139	4.45824	4.63936	5.01736
Arhgef9	0.330172	0.199535	0.251671	0.169878	0.173169	0.307193	0.307698	0.237484
Arid1a	7.42121	7.053	6.55724	5.28819	4.89552	5.43859	5.47372	7.41005
Arid3a	1.57071	1.14792	1.01802	0.390921	0.384908	0.564544	0.46266	2.26671
Arid3b	0.572326	0.642345	0.652197	0.857497	0.638553	0.938373	0.668168	1.05085
Arid3c	0	0.0393013	0	0	0.0434103	0	0.0385672	0.059533
Arid4a	1.10459	1.26948	0.996048	1.00086	1.43507	1.60324	1.38203	1.62252
Arid4b	4.60126	4.50036	4.71903	3.4984	4.74445	4.26688	4.63655	4.22917
Arid5a	0.195609	0.319331	0.286343	0.348898	0.68339	0.693053	0.274196	0.211626
Arid5b	1.86516	2.01858	2.46154	2.56441	2.32597	2.01425	2.58004	2.0951
Arih1	7.78575	7.95163	6.81969	7.17698	7.46396	7.42197	7.18927	8.69996
Arih2	7.61596	6.99827	6.96824	6.47404	5.77607	7.56045	6.27203	8.1169
Arl1	27.3176	26.0471	25.3926	29.1488	27.4517	24.1068	27.9569	33.2086
Arl10	0.110284	0.123776	0.0683016	0.0491771	0	0.148213	0.121465	0
Arl11	0.860558	1.06575	0.808634	1.32322	1.76577	1.71484	1.27463	0.605395
Arl13a	0.182729	0.0878933	0.129335	0.162962	0.161804	0.0350818	0.172503	0.0443798
Arl13b	0.683981	0.644285	0.529506	0.631777	0.847919	0.65658	0.807129	0.643714
Arl14ep	2.81087	2.8246	2.51004	2.41936	2.47163	3.07477	2.91584	3.11176
Arl2	6.70317	5.91902	5.49453	8.52752	6.96557	9.47216	6.07988	5.69804
Arl2bp	8.6997	8.19696	6.62515	7.87355	7.18991	7.96765	7.12117	8.32644
Arl3	6.35276	7.31925	9.40081	8.82422	11.0813	10.1242	12.6314	6.97722
Arl4a	3.42073	4.2606	5.06382	7.47792	7.2918	6.27906	6.38639	3.75886
Arl4d	1.24968	1.05192	0.890046	1.11449	1.20063	2.60316	1.514	1.54032
Arl5a	11.4235	10.9232	11.0312	9.65156	10.0155	7.2216	9.85004	12.3937
Arl5b	3.34298	3.38205	3.86861	3.20531	3.7162	4.00756	4.89189	3.60217
Arl5c	0.283256	0.454156	0.050122	0.144351	0.25082	0.0543817	0.133702	0.27518
Arl6	1.07404	0.723261	0.851425	0.804596	1.22495	0.808312	1.23024	0.803429
Arl6ip1	37.2385	33.2293	36.1926	25.1488	27.0154	28.3271	25.6195	42.4953
Arl6ip4	8.81667	11.402	8.94332	12.4901	12.3242	15.0183	12.7075	10.1779
Arl6ip5	12.3361	11.7941	13.1107	9.16802	11.1392	9.51737	8.80618	12.2988
Arl6ip6	2.44346	2.0356	2.05933	1.99942	2.06105	2.94527	2.66343	1.71305
Arl8a	7.68927	7.80673	6.89258	8.88766	7.21191	8.87205	8.21807	7.0523
Arl8b	13.6063	15.1466	15.9519	16.4662	17.1617	17.9668	19.7079	16.327
Armc1	8.87634	10.3927	8.64188	8.42108	8.89817	8.00179	7.54336	10.9609
Armc10	3.13846	2.66698	3.35986	3.53868	3.30709	3.70566	3.48132	2.55352
Armc12	0.035536	0.0398835	0	0	0	0.0477574	0	0
Armc5	4.77678	5.25722	4.45804	5.82955	4.90467	5.26371	3.96399	5.01659
Armc6	1.04199	1.10925	0.684855	0.877275	0.755802	1.21054	0.793658	0.86126
Armc7	1.0202	0.960991	0.74466	0.682379	0.564609	0.416215	0.601941	0.929166
Armc8	2.20396	2.56077	2.36914	1.74042	1.81746	1.63102	1.7751	2.49247
Armc9	0.956353	0.728699	0.81508	0.813776	0.804886	0.907934	0.831048	0.775659
Armcx1	0.385684	0.501216	0.628587	0.651718	0.754935	0.518326	0.760138	0.483149
Armcx2	0.248817	0.176373	0.227092	0.256938	0.178579	0.193594	0.216348	0.356223
Armcx3	2.96782	3.4296	3.21317	3.47022	3.62465	3.48624	3.89821	3.62536
Armcx6	0.0223595	0.05019	0.110782	0.159526	0	0.090148	0.0246263	0.0760271
Arnt	8.21558	7.64399	7.07048	6.47048	5.29076	4.11052	5.85604	7.52786
Arnt2	0.0415823	0	0.0429215	0.0432648	0.017183	0.00931385	0.0152659	0.0117824
Arntl	8.52793	7.86209	7.7786	6.82936	7.40754	5.49652	4.85597	8.30944
Arntl2	1.65388	1.85622	1.39675	2.16776	1.2426	0.639861	2.23553	1.19287
Arpc1a	19.6487	18.1124	18.306	29.0876	22.9192	24.694	20.4869	19.2535
Arpc1b	14.0265	17.9128	13.2628	17.7342	15.8142	18.9668	16.8471	12.6593
Arpc2	44.0531	42.995	47.3756	53.4981	47.3028	50.5893	56.2115	43.1789
Arpc3	31.59	34.1766	32.6891	38.3732	36.3994	41.323	41.8273	32.914
Arpc4	26.2153	25.0976	27.6984	27.7089	24.1859	28.4214	23.2587	28.1649
Arpc5	13.6463	14.681	14.7101	12.8279	13.7165	13.8785	12.5112	13.2512
Arpc5l	12.6909	17.3748	15.7195	16.5978	13.7503	16.964	12.3286	14.6346
Arpp19	29.8031	29.0179	27.45	32.94	37.8937	39.7105	33.8064	22.7358
Arpp21	0.0314809	0.075748	0.0779873	0.012018	0.180207	0.11199	0.089175	0.0841313
Arr3	0.0697517	0.0782851	0.129596	0.0933094	0	0.0937403	0.0768229	0.118585
Arrb1	0.925434	1.6117	0.94865	0.56919	0.395602	0.557523	0.913812	1.35632
Arrb2	2.93482	3.79834	2.98022	3.34832	3.21215	3.0203	4.1642	2.24752
Arrdc1	3.63676	4.14306	3.99662	5.41372	4.10165	5.07124	5.24021	2.37088
Arrdc2	1.15484	1.02436	0.55372	1.21265	0.992912	1.05136	0.984711	0.981678
Arrdc3	36.3444	30.9044	19.0295	31.0829	28.4176	32.0188	26.8514	32.0738
Arrdc4	1.60251	1.33608	1.07754	0.489998	0.340561	0.430728	0.554705	1.55682
Arrdc5	0	0	0	0	0	0	0.0468968	0
Arsa	12.2673	12.7824	12.4226	12.431	8.60472	12.9453	13.4485	9.63309
Arsb	7.44339	7.46916	7.00814	9.5954	6.3241	7.16746	6.99765	7.21426
Arse	1.66967	1.61	1.54382	2.01337	1.86579	2.08588	1.37273	1.4393
Arsg	0.436952	0.122602	0.10148	0.438395	0.372406	0.477121	0.180468	0.325003
Arsi	0.07522	0	0	0.022361	0	0.0336964	0	0.0852545
Arsj	0	0	0	0	0.059671	0.0323441	0.0265069	0.0409165
Arsk	3.11318	1.97614	2.21254	1.95714	1.89805	2.02334	1.7706	1.99562
Art1	0	0	0.0390651	1.57233e-09	0.0390978	0.0423851	0	0.0536188
Art2	0.620454	0.614436	0.632901	0.39059	0.407205	0.343345	0.683353	0.496393
Art3	0.23307	0.261584	0.0360865	0.259822	0.252817	0.156613	0.128349	0.0495305
Art4	0.319037	0.37796	0.439082	0.426787	0.263669	0.547858	0.468506	0.301331
Art5	0.0217075	0.0487265	3.0215e-10	0.0387186	0	3.27829e-10	0	0
Artn	0.032439	0.182038	0.0401804	0.11572	0	0.174381	0.0357275	0
Arv1	4.72595	4.7525	4.96401	5.25997	3.79642	5.03021	3.83092	4.49938
Arvcf	4.05814	4.63159	3.48322	3.93519	3.55699	4.33231	4.6458	4.00351
Arx	0.015531	0.0174311	0.0192375	0.013851	0.0192536	0.0417448	0.0513166	0.0528087
As3mt	52.3324	57.6499	63.5576	70.1388	64.8424	68.1653	56.8097	57.7921
Asah1	6.58233	7.32338	6.35712	6.85718	7.00105	6.76919	7.77496	7.42799
Asah2	0.283239	0.397364	0.328906	0.2526	0.197509	0.309278	0.194971	0.270864
Asap1	1.46051	1.74164	1.38909	1.94215	1.34176	1.31437	1.60857	1.55188
Asb1	0.363365	0.143936	0.211803	0.324058	0.344467	0.37343	0.306036	0.254371
Asb10	0.024311	0	0.0903381	0.0650434	0	0.0653438	0.0803266	0.0413312
Asb11	0.0655676	0.0735892	0.0406075	0.0292374	0.121925	0.0440587	0.108322	0.167208
Asb12	0	0	0	0.0290171	0.0403353	0.0874533	0.0358352	0
Asb13	2.24145	2.79519	2.58006	1.57496	2.86289	4.83797	2.49362	3.19483
Asb14	0	0.168929	0.0266335	0.0191761	0.0799675	0.0866911	0.023682	0
Asb16	0.0616364	0.0345885	0.0763457	0.0274844	0.0382048	0	0.0339424	0
Asb17	0.0464261	0.0521059	0.0575055	0	0	0	0.0511326	0
Asb18	0	0.0318178	0.035115	0	0	0.0380993	0.0312235	0.0481971
Asb2	0.0347495	0.097502	0.0645636	0.0929715	0.0646176	0.0934008	0.0956808	0.0590778
Asb3	3.73276	3.53973	3.3626	4.13006	3.24168	3.6752	3.27575	4.24203
Asb4	0.0286125	0	0	0	0	0.0384528	0	0
Asb5	0.318324	0.519662	0.430135	1.00652	0.46637	0.350018	0.669317	0.442786
Asb6	2.81194	3.24549	2.44551	3.18361	2.44756	3.6182	2.92129	3.39049
Asb7	1.83874	1.65605	1.79954	1.82204	1.01309	1.43385	1.20008	2.277
Asb8	9.69001	8.97468	9.26741	10.5346	7.73374	9.62286	8.61816	10.5332
Asb9	0	0	0	0	0.0555814	0.0602547	0	0
Ascc1	5.26256	5.48217	5.22197	6.17128	6.48787	7.15059	6.56461	5.53621
Ascc2	3.591	2.98963	2.94444	3.78892	2.8215	3.39859	2.91522	3.46814
Ascl1	0	0.0650013	0	0.103302	0.0358987	0.038917	0.0637872	0
Ascl2	0.0569608	0.223753	0.141109	0.0253995	0.0706133	0.114826	0.0941029	0.193678
Ascl3	0.0668363	0.0750131	0.0827866	0.238425	0.331424	0.35929	0.073612	0.113629
Asf1a	2.03616	2.21329	2.14477	2.27345	1.55029	1.80992	1.8541	2.34414
Asf1b	0.24501	0.244431	0.0674403	0.218506	0.168742	0.256101	0.0299832	0.0925651
Asgr1	156.391	159.221	178.478	172.511	213.376	232.543	205.488	144.947
Asgr2	91.0271	89.5082	92.8371	114.137	97.3002	105.014	101.473	86.6137
Ash1l	4.3214	3.95627	4.0236	3.18108	3.67883	3.57694	3.51307	4.36107
Ash2l	4.27078	3.82248	4.35252	4.17841	3.57428	3.92324	3.51292	4.10524
Asic1	0.0915964	0.115653	0.156001	0.153165	0.141938	0.107711	0.189154	0.116793
Asic2	0.189142	0.0893109	0.101679	0.0546516	0.0420298	0.119537	0.0746814	0.0753636
Asic3	0	0.0302487	0	0.024036	0.0668226	0	0	0
Asic4	0.0328587	0	0.0407003	0.0146521	0	0.0883185	0.0542847	0.0279316
Asic5	0.0916207	0.128537	0.170229	0.183847	0.113581	0.184696	0.327954	0.0778824
Asip	0.0622137	0.0698249	0	0.0554837	0.0771252	0	0.137041	0
Asl	89.2865	96.8236	99.3829	92.9889	122.346	132.158	101.249	85.7502
Asmt	0.0278917	0.15652	0.0690958	0.0746234	0.0345768	0	0.0614384	0.0948374
Asmtl	8.8381	10.2988	9.39193	10.1217	11.5552	13.8897	10.532	9.52448
Asna1	11.6736	13.0299	12.4391	16.971	14.0751	16.1611	15.5341	14.0827
Asns	0.364086	0.769182	0.397918	3.03691	0.424801	0.60443	0.589699	0.764627
Asnsd1	5.25367	5.91717	4.83475	4.22342	4.86173	5.0219	4.46195	5.91259
Aspa	2.18685	2.67466	1.97946	2.90043	2.29392	2.37376	3.08788	3.38422
Aspdh	51.2661	49.7847	50.8906	70.5667	46.0314	62.6673	60.568	44.1198
Aspg	50.1556	55.2934	48.1618	32.2355	40.9071	46.4846	31.4824	46.3865
Asphd2	0.0265048	0.0297474	0.0984901	0	0.065715	0	0	0.0450609
Aspm	0.124287	0.159419	0.225423	0.186056	0.209103	0.250546	0.127109	0.188661
Aspn	0.169651	0.190407	0.105069	0.201732	0.210314	0.455994	0.0934251	0.432637
Asrgl1	10.5327	10.3871	10.9358	14.3662	11.8091	16.4448	15.055	9.74333
Ass1	746.059	647.176	741.359	664.398	550.383	590.19	481.953	743.408
Aste1	0.573057	0.381879	0.532361	0.415242	0.568135	0.625739	0.611428	0.60891
Astl	0.0383789	0.0215371	0.023769	0	0	0	0.0422697	0
Astn1	0.0120101	0.0269588	0.0148763	0.0160664	0.0446661	0.0322811	0.0330691	0.0204184
Astn2	0.265449	0.297924	0.265567	0.400627	0.177193	0.219533	0.224892	0.156216
Asun	3.19129	3.5466	3.37157	3.44598	3.16107	3.61607	3.63542	3.61702
Asz1	0	0.0280919	0.031003	0	0.0310289	0	0	0
Atad1	13.5429	14.9265	12.9466	11.0756	12.0054	12.4358	11.6356	14.1076
Atad2	0.675965	0.610418	0.635179	0.658276	0.837982	0.647394	0.761607	0.858605
Atad3a	8.56934	9.72047	7.28038	7.49538	6.2196	6.64411	5.82821	9.71251
Atat1	0.852564	1.09356	0.867449	1.22197	0.981416	0.982092	0.905459	0.931787
Atcay	0.0475859	0.0890126	0.0196474	0.0282922	0.0196638	0.0852686	0	0
Ate1	1.08632	1.15505	0.920647	1.11327	1.19312	0.89644	1.02852	1.47424
Atf1	9.8965	9.04029	9.35499	8.32825	8.50956	8.75004	8.46167	10.5631
Atf2	6.54186	5.50665	4.36986	5.73001	5.15554	4.74124	4.76048	6.95115
Atf3	0.182757	0.179476	0.226371	0.346347	0.283201	0.706128	0.528371	0.310705
Atf4	54.3866	54.604	64.4328	54.2775	58.0197	67.8702	52.3617	60.5726
Atf5	316.317	321.085	278.995	319.74	234.955	297.606	253.231	292.326
Atf6	11.2739	10.3183	9.1932	6.41562	7.58699	6.9082	7.3466	13.1201
Atf6b	10.6606	11.6749	10.4955	12.825	9.24463	9.81361	9.55999	10.16
Atf7	2.68164	2.20856	2.38964	2.77007	1.76981	2.38531	1.91233	2.39433
Atf7ip2	0.0870051	0.0244123	0.0538843	0.0387967	0.0539294	0	0.0239564	0
Atg10	1.84653	1.43242	0.908153	1.86474	1.64951	1.45976	1.70474	1.89281
Atg12	11.7065	11.4398	11.1877	11.2202	11.2596	11.3926	11.4854	11.3237
Atg13	18.0845	17.0201	17.0961	21.3202	16.0575	15.1008	16.6242	21.0285
Atg14	2.95103	2.28859	2.63557	3.02714	3.20302	3.28509	2.99911	2.47623
Atg16l1	4.13016	4.48751	3.37426	3.5397	3.39524	4.33024	3.19388	4.83053
Atg16l2	0.741224	0.947448	1.09664	1.39553	1.58252	1.68791	1.22455	0.840105
Atg2a	6.63988	5.86241	5.40706	5.50255	4.94725	5.36322	4.50782	5.87002
Atg3	10.7553	11.0275	10.3659	14.1528	10.9125	13.4962	12.3919	11.1186
Atg4al1	3.94622	4.28013	3.40926	4.34742	4.02876	4.72402	4.41932	4.51024
Atg4b	4.12883	3.98045	3.71542	4.81518	3.45604	4.57657	4.04213	3.62971
Atg4c	4.06989	4.63401	5.18728	5.45322	5.75222	5.57529	6.86449	5.38163
Atg4d	7.83809	8.37215	8.13648	7.94341	7.92246	9.54619	7.57813	7.68491
Atg5	5.81219	5.66126	5.24517	6.34974	6.25315	6.77891	6.33283	5.68176
Atg7	2.24487	2.09959	2.06228	2.85289	1.97124	2.66494	2.12218	2.79877
Atg9a	17.9452	16.2952	14.5522	19.6159	15.0494	15.3199	15.3736	16.9532
Atg9b	0.124472	0.0174625	0.0192721	0.0693796	0.0192883	0	0.0342727	0.0529039
Atic	7.28002	7.58565	6.34875	6.80241	6.05251	9.12993	5.53035	8.56628
Atl1	0.384309	0.318806	0.206966	0.327835	0.269282	0.314378	0.496881	0.454515
Atl2	20.8495	20.8363	18.6379	18.9201	19.6352	22.9031	20.1955	22.4485
Atl3	19.0565	17.5275	14.713	13.9085	13.6394	13.6378	15.459	19.2863
Atm	1.19049	1.03811	0.80582	0.738065	0.784549	0.773194	0.979728	1.17374
Atmin	0.170977	0.191895	0.0891707	0.184583	0.100401	0.181405	0.158577	0.168288
Atn1	4.49712	3.94043	4.38542	4.45041	3.25208	4.51956	3.50839	4.35931
Atoh1	0.0411987	0	0.0255153	0.0551131	0.0255367	0.0276838	0	0
Atoh8	4.3449	4.79484	5.24668	5.47997	4.5299	5.44827	6.18694	3.70884
Atox1	47.5552	43.0524	48.2731	57.5633	49.5078	70.619	50.2542	43.1789
Atp10a	0.0827925	0.0929214	0.0205101	0.0738364	0.0615819	0.0445064	0.0729486	0.0422267
Atp11a	7.39189	6.71753	6.72535	5.59078	5.2958	5.76441	5.51463	8.23693
Atp12a	0	0.0120573	0.0266137	0.0287427	0.013318	0.0144377	0.0118321	0.0182643
Atp13a1	8.91388	8.31371	7.11291	10.6264	7.76476	8.70683	7.63448	8.47267
Atp13a2	2.6202	2.73618	1.93319	3.0581	2.61269	3.16919	2.79799	2.59529
Atp13a3	1.36634	1.04278	1.28623	1.16979	1.62607	1.0283	0.601941	1.48667
Atp13a4	0.022136	0	0.0137093	0.0394829	0.0137208	0.0446234	0.0365701	0.0376335
Atp13a5	0.280491	0.28224	0.347429	0.526175	0.239807	0.311964	0.383495	0.263097
Atp1a1	63.4463	63.8383	60.9226	88.8405	56.4838	75.4839	63.5483	64.0167
Atp1a2	0.0420657	0.0566545	0.0625255	0.0375153	0.0417186	0.135679	0.0741284	0
Atp1a3	0.121316	0.108926	0.0901604	0.173108	0.0300786	0.0652153	0.0668072	0.12375
Atp1a4	0.0250627	0	0.0310438	0.0558788	0.0310697	0.016841	0.0828103	0
Atp1b1	11.5336	15.1279	15.6111	11.684	13.5528	15.925	14.5137	15.4495
Atp1b2	0.173981	0.260355	0.0718336	0.168091	0.143788	0.214331	0.17565	0.221839
Atp1b3	5.48609	5.97068	6.08932	5.80339	6.24163	7.53243	7.03622	6.41984
Atp1b4	0.155124	0.174102	0.140906	0.0830063	0.141024	0.0833896	0.0911202	0.0703273
Atp2a1	0.0831112	0.155465	0.154418	0.123534	0.154547	0.148926	0.183074	0.141298
Atp2a2	29.894	29.7037	26.2551	26.2082	21.3916	24.0067	24.1775	31.6291
Atp2a3	0.617907	0.650159	0.251137	0.396078	0.347098	0.973143	0.404076	0.410354
Atp2b1	5.68673	5.76368	4.66639	4.589	5.27782	5.94111	5.11629	5.27663
Atp2b2	1.7584	1.58025	1.14426	1.57386	1.2084	1.12163	1.54371	1.55972
Atp2b3	0.0255986	0.0383071	0	0.0608786	0.010578	0.0114674	0.0281937	0.0435202
Atp2b4	0.108022	0.0969897	0.173941	0.0963365	0.0937389	0.0580688	0.0951781	0.0734592
Atp2c1	11.0904	11.8123	11.835	10.0349	10.8319	9.90823	9.91025	12.2137
Atp2c2	0.0294819	0.0165444	0.0365177	0.0394391	0.0182741	0.0198106	0.0649414	0
Atp4a	0.0139054	0.078033	0.0344478	0	0.0517149	0.0560631	0.0306302	0.0472813
Atp4b	0.058189	0	0	0	0	0.0391006	0	0
Atp5a1	211.006	183.205	185.606	244.826	169.221	206.427	193.014	207.086
Atp5b	401.424	383.315	378.83	536.737	388.641	420.032	408.272	388.888
Atp5c1	120.319	120.9	121.429	154.805	130.624	135.339	140.552	118.409
Atp5d	69.2225	63.6207	62.1146	104.818	79.383	96.0068	85.0485	58.7968
Atp5e	109.333	101.737	120.043	161.475	159.999	171.112	153.781	101.227
Atp5f1	124.807	118.557	127.475	138.327	130.73	125.233	142.03	123.212
Atp5g1	139.303	160.146	146.618	196.647	150.747	189.694	197.334	142.098
Atp5g2	86.9061	77.1142	73.6209	117.553	93.9259	103.218	89.8484	72.816
Atp5g3	198.473	188.05	182.627	348.569	223.605	240.716	238.044	162.087
Atp5h	55.5695	62.9287	59.051	69.9698	81.7741	74.1434	68.6882	52.5044
Atp5i	95.7647	88.0301	87.3447	110.587	98.5303	124.885	111.397	75.1821
Atp5j	79.0892	92.5014	87.9673	108.5	98.921	83.3774	106.551	81.6364
Atp5j2	89.6507	96.2439	100.151	101.612	130.715	121.826	126.479	96.5129
Atp5l	144.852	139.71	133.979	159.891	189.963	158.812	183.264	121.37
Atp5o	96.5512	93.0787	110.213	120.746	121.358	111.208	129.141	97.2839
Atp5s	1.73486	1.21694	1.66538	1.58587	1.34417	1.42805	1.76743	1.32725
Atp5sl	5.87813	5.7857	5.28734	7.57216	6.27493	6.67714	6.37128	6.34504
Atp6ap1	19.4553	20.3876	20.1807	19.4477	19.2948	22.483	21.061	19.881
Atp6ap1l	0.938615	0.505654	0.83708	1.07146	1.30321	0.655938	1.86078	0.829786
Atp6ap2	15.4623	16.3185	15.5869	14.5795	14.4105	17.2092	13.8596	16.6885
Atp6v0a1	12.5737	12.3783	11.9885	12.2347	10.097	10.3653	8.64931	12.1024
Atp6v0a2	4.06404	3.61884	3.245	2.96543	2.39415	3.29509	2.12705	5.56741
Atp6v0a4	0.0273787	0.0153641	0.0169563	0.0366256	0.033941	0.110384	0.0452315	0.0232734
Atp6v0b	26.5152	24.2292	25.8568	35.8461	33.2722	47.5703	38.2712	23.3659
Atp6v0c	103.27	116.999	110.306	132.043	116.071	145.391	129.439	105.355
Atp6v0d1	59.5309	65.4679	56.2149	75.4556	60.0803	63.8864	63.7948	61.2628
Atp6v0d2	0.0330853	0.0371329	0.163924	0.0295063	0.0410152	0	0	0.0562484
Atp6v0e1	34.2308	35.0526	37.276	42.5638	50.1916	60.8744	51.8816	36.0428
Atp6v0e2	13.0731	13.3233	12.2843	11.4356	9.18989	12.1166	12.3573	16.7757
Atp6v1a	4.3293	3.98958	3.41726	3.34997	3.01234	3.67916	3.41253	4.23936
Atp6v1b1	0.0520824	0	0.0430078	0.0154828	0.0645656	0.0233314	0	0.0590303
Atp6v1b2	13.5857	15.2838	12.3431	12.7733	10.8639	13.349	12.6162	16.6691
Atp6v1c1	7.08051	6.83531	7.23699	8.10297	9.11519	9.28271	9.70699	7.61821
Atp6v1c2	0.27776	0.311742	0.0764548	0.357808	0.267816	0.248857	0.271928	0.157407
Atp6v1d	11.5359	12.1614	10.9025	10.9719	13.7635	13.8454	11.4201	9.29597
Atp6v1e1	13.5828	13.7437	14.0347	14.5299	13.7411	14.1398	13.2157	13.3408
Atp6v1e2	0.0435245	0.0488493	0	0	0.107913	0	0.0479369	0
Atp6v1f	12.8453	18.5682	15.3276	18.5331	17.5081	20.0648	18.5917	16.1215
Atp6v1g1	47.2366	48.4585	50.2434	60.6984	66.5822	68.9928	63.3159	45.4504
Atp6v1g2	0.0294719	0.0330775	0.0365052	0	0	0.0396077	0.0649193	0.0501052
Atp6v1g3	0	0.0281899	0	0	0.0311372	0	0	0
Atp6v1h	11.7919	12.1219	11.1807	9.98123	10.7697	13.4282	9.6256	10.7778
Atp7a	0.52654	0.611692	0.320377	0.28834	0.412259	0.36002	0.376439	0.518258
Atp7b	8.60232	7.12884	6.38148	8.39209	6.59097	5.88051	7.7298	8.39895
Atp8b1	2.62145	2.52352	2.19465	2.23623	2.15795	2.06089	2.73885	3.89304
Atp8b2	7.37207	7.04118	6.75043	5.95293	5.23727	4.91114	5.81621	7.43379
Atp9b	4.51058	4.27407	3.34382	4.17359	4.47964	4.65158	4.25948	4.67588
Atpaf1	4.12611	3.57196	3.95955	4.81007	3.47406	3.89863	4.24971	4.76433
Atpaf2	5.67021	6.46334	5.26754	5.89964	6.1506	6.4693	5.52946	5.0208
Atpbd4	1.09399	0.941339	0.925965	0.682956	1.06236	0.735117	0.943838	0.867954
Atpif1	16.3927	18.2976	17.4199	21.7294	27.0956	28.2903	29.6962	14.3153
Atraid	11.8291	10.8253	10.0874	13.6738	11.6187	12.1676	12.5272	10.5195
Atrip	0.558971	0.513291	0.419617	0.574035	0.293977	0.52357	0.615638	0.806323
Atrn	41.974	39.6519	37.3387	30.0827	25.4898	25.7314	27.4357	45.1847
Atxn1	2.88231	3.24587	3.00328	1.77157	1.60551	1.96297	2.18784	4.18837
Atxn10	16.9366	15.6085	14.8031	18.9337	14.8746	13.9132	14.7389	17.5602
Atxn2l	9.08549	9.59653	9.21554	11.0466	7.69647	9.61887	8.76129	8.5641
Atxn3	5.46393	5.40535	3.78512	2.96391	2.74084	3.3498	2.9779	4.81221
Atxn7l3b	18.2504	17.1564	16.3854	18.1332	14.6985	15.029	15.3655	18.8248
Auh	13.0984	11.784	16.1814	19.531	14.6485	14.7159	17.5558	14.021
Aup1	42.2067	46.0101	44.8858	64.0681	49.8063	58.6361	53.4266	44.3516
Aurka	0.935425	1.04987	0.840597	0.73609	1.29606	0.887387	0.686837	0.654837
Aurkaip1	22.4876	24.2923	25.2081	27.9768	21.6051	30.4482	25.5104	23.9902
Aurkb	0.359403	0.376481	0.207747	0.320525	0.267327	0.193203	0.105557	0.0814696
Aurkc	1.11243	0.624264	0.947313	1.61215	1.0343	1.58845	1.22521	0.827422
Aven	6.60487	5.03346	5.50457	8.43562	7.88469	7.72574	6.24166	6.03037
Avil	0.329481	0.2894	0.301646	0.127756	0.106553	0.346534	0.220885	0.535797
Avp	0	0	0	0	0.0914956	0	0	0
Avpi1	4.7	7.01843	5.42695	7.13989	4.78959	5.62053	5.39581	7.24561
Avpr1a	38.929	33.4594	34.5811	70.9557	57.214	40.7558	52.2908	29.9872
Avpr1b	0	0	0	0.0507991	0.0353067	0	0.0313677	0
Avpr2	0	0.0868432	0.0479213	0.0345033	0	0	0.0426105	0.0657743
Awat1	0	0.0364076	0	0.0289299	0.040214	0.130786	0.0714551	0
Awat2	0.12927	0	0	0	0	0	0.0474584	0.0732576
Axin1	4.96572	4.81584	4.11628	5.57543	5.20885	6.5195	4.57163	4.95711
Axin2	2.79409	2.54306	2.08342	1.27691	1.98177	2.72752	2.18935	3.33226
Axl	4.09579	6.77862	4.18899	4.76329	3.2266	4.62038	4.51767	5.11179
Azgp1	411.905	390.817	454.965	485.724	534.888	543.675	510.727	391.303
Azi1	1.35526	1.5076	1.18845	1.28352	0.936686	1.53122	1.37376	1.03989
Azi2	5.3619	5.87228	4.79366	6.1316	4.90489	6.3052	5.88166	4.55789
Azin1	8.5279	10.06	7.52711	6.92795	8.88943	8.12599	5.97903	9.1088
B2m	569.507	600.26	577.814	535.016	580.843	601.16	613.696	577.802
B3galnt1	0.0454487	0.102018	0.0562949	0.182395	0.225368	0.122158	0.200225	0.115901
B3galnt2	3.246	3.22796	3.30491	3.1457	3.73209	3.48137	3.4168	3.75484
B3galt1	5.90237	4.864	6.66999	12.5756	10.725	12.3005	12.3959	6.07577
B3galt2	0.106417	0.130294	0.179745	0.0603943	0.143916	0.104011	0.0639301	0.0986836
B3galt4	1.80814	1.50664	1.86638	2.29666	2.10567	2.54045	1.78023	2.56169
B3galt5	0.0820218	0.0736451	0.0406384	0.0512044	0.0203362	0.0661382	0.0722695	0.0278891
B3galt6	0.969799	1.04309	1.05108	1.02706	0.951776	1.22187	0.823338	1.20222
B3gat1	0.0206585	0.0231859	0	0.0184238	0	0	0.0227528	0
B3gat2	0.0655179	0.147067	0	0.0389537	0.0541476	0.117401	0	0.0742581
B3gat3	14.511	15.5166	13.489	15.8279	16.2887	19.7596	15.3778	14.7834
B3gnt1	4.01234	2.98583	2.94411	3.32549	3.59536	3.31154	3.24227	4.15215
B3gnt2	1.81005	2.08104	1.82277	1.71924	2.7182	2.53144	2.00975	2.67697
B3gnt3	0.039978	0.0224345	0.074278	0.0356534	0	0.0805907	0.0880618	0
B3gnt4	0	0.102811	0	0	0.0378535	0.0410363	0	0.103825
B3gnt5	0.0307743	0.0115131	0.0254123	0.0457421	0.0254335	0.041358	0.0564901	0.0523194
B3gnt6	0	0	0.0335509	0.0241566	0.067158	0	0.0298327	0.0921006
B3gnt7	0.17059	0.229752	0.23243	0.365127	0.0845909	0.252184	0.244249	0.377026
B3gnt8	0.190624	0.0267431	0.147572	0.127502	0.0886174	0.192137	0.131218	0.08102
B3gntl1	0.514343	0.320705	0.389333	0.382254	0.566776	0.384019	0.597957	0.0971597
B4galnt1	16.167	15.5033	18.1613	20.268	17.6503	23.542	16.8498	14.366
B4galnt3	0.0581499	0.016316	0.0720271	0	0	0.0195371	0.0320225	0.0494304
B4galnt4	0.0489527	0	0	0.0218286	0.0910287	0.0657883	0.0269577	0.0416123
B4galt1	7.7235	7.33643	5.62335	6.09841	5.558	6.45569	4.83418	9.31964
B4galt2	0	0.0960049	0.132442	0.0762867	0.132553	0.114958	0.0706588	0.145427
B4galt3	3.35328	3.86192	3.23053	3.40101	3.07021	4.74217	3.45184	3.35349
B4galt4	0.0207478	0.0232862	0.0256993	0.0185035	0.0771623	0.111533	0.137107	0.10582
B4galt5	2.24017	2.30251	1.95695	2.22917	2.514	1.39438	2.12964	1.80403
B4galt6	0.443785	0.69731	0.559687	0.705206	0.510142	0.509659	0.497662	0.534996
B4galt7	3.9477	3.00542	3.76139	4.13616	3.93565	4.48917	3.22293	4.08322
B9d1	0.798575	1.19503	1.45076	1.28194	1.84796	2.07489	1.11407	0.995617
B9d2	0.874351	1.40188	1.34087	1.15109	1.7033	2.07033	1.23813	1.13256
Baalc	0	0	0.0226803	0.0163298	0	0.0492157	0	0.0622597
Baat	391.244	343.641	385.427	389.729	430.552	383.967	462.656	395.677
Babam1	10.5244	9.68436	9.7163	16.0027	10.4538	11.9477	9.17949	9.39084
Bace1	4.58173	4.17668	4.03951	3.94335	3.49722	3.33417	3.70202	4.28588
Bace2	0.86632	1.19186	1.14229	1.44552	0.970031	1.80273	0.769472	1.23528
Bach1	6.05163	6.56708	5.64255	6.5169	6.55813	8.50989	6.82697	7.26774
Bad	4.27018	3.24347	4.11386	3.30818	2.88746	4.92722	3.08788	2.93323
Bag1	14.5901	14.7821	13.4109	15.9263	15.9593	20.0959	17.269	14.2543
Bag2	0.791109	0.717145	0.791461	0.732666	0.414922	0.858725	0.670238	0.362106
Bag3	19.3996	18.6923	17.8956	12.5044	11.266	14.3069	10.9283	18.2249
Bag4	2.39719	2.25008	2.63569	2.56932	2.75257	2.25156	2.24539	2.50514
Bag5	4.1971	4.78304	4.21229	4.20376	4.82951	5.9298	4.17218	5.30588
Bag6	15.4851	15.9438	13.465	17.3589	13.4651	15.0791	13.5151	14.3009
Bai1	0	0	0.0205851	0.0444638	0.0309035	0.0446692	0.0274557	0.0282541
Bai2	0.0172671	0.038759	0.0213878	0.0307984	0.0535142	0.0696164	0.0380351	0.0146779
Bai3	0.0157779	0.0177082	0	0.049249	0	0.0530105	0.0347549	0
Baiap2	3.50597	3.88099	4.01547	4.96848	2.26245	4.22765	3.17375	3.38851
Baiap2l1	8.55164	9.49121	9.50967	11.9652	7.23246	10.701	8.58137	9.53091
Baiap2l2	0.0445116	0.0249786	0.165403	0.0992415	0.0827705	0.14955	0.0735361	0.151349
Bak1	1.07885	1.74057	1.47551	1.54343	0.947343	1.32905	0.915916	0.878863
Bambi	2.3588	1.95676	1.07977	1.4634	1.0171	1.72284	1.80725	1.65639
Banf1	14.9391	15.6871	17.1725	24.0724	17.1167	22.8147	19.5075	16.932
Bank1	0.484505	0.528243	0.291492	0.333329	0.308896	0.483699	0.274434	0.329483
Banp	1.28083	1.34478	1.89356	1.73183	1.56221	1.55474	2.00225	1.15901
Bap1	5.82437	5.96849	5.1755	7.25767	5.80769	5.84739	5.89504	6.20344
Bard1	0.123361	0.0791159	0.109143	0.110016	0.0655407	0.0710514	0.0194095	0.149804
Barhl1	0	0.020267	0.0447345	0.0322089	0	0.0242682	0.0198885	0
Barhl2	0.0826604	0.123697	0	0.0491457	0.0341576	0.111089	0.0303468	0
Barx1	0.0629392	0	0.0389797	0	0.0780246	0	0.0693198	0
Basp1	0.212482	0.763126	0.579017	0.644288	0.52682	1.14223	0.608458	0
Batf	0.311903	0.150026	0.165573	0.516588	0.386661	0.239526	0.196299	0.151505
Batf3	0.751826	1.56707	1.46339	1.34099	1.06517	1.15473	2.12925	0.547792
Bax	6.84186	5.11926	6.8054	8.55168	7.77493	10.4487	5.42325	4.75849
Baz1a	2.00934	2.52101	2.18534	0.852283	1.49862	2.48084	1.54733	2.3746
Baz1b	5.99614	5.9179	5.47613	4.44922	3.58676	4.78774	4.67567	5.52801
Baz2a	4.48154	4.53304	3.29807	2.78169	2.87215	3.188	2.74214	4.27985
Baz2b	1.51952	1.43364	1.27477	1.03121	1.23831	1.13089	1.18017	1.65705
Bbc3	3.35505	3.40689	2.3747	5.73489	6.43685	7.8369	5.85069	3.19148
Bbox1	69.4752	64.5281	61.8422	71.7516	53.4789	43.9178	56.9905	78.6383
Bbs1	0.725361	0.555657	0.741591	0.708505	0.742212	0.417782	0.735492	0.782978
Bbs10	3.254	3.6521	3.56935	3.3207	2.78964	2.78486	2.72803	4.29361
Bbs2	2.63454	1.93985	2.43186	1.63122	1.6434	1.66882	1.57094	1.997
Bbs4	2.20182	1.75686	2.04546	1.84091	1.8126	1.52576	1.74299	2.19335
Bbs5	1.10385	0.814131	1.01569	1.04069	1.25113	1.05963	0.83366	0.750663
Bbs7	0.304397	0.233752	0.218286	0.371483	0.417077	0.538268	0.494061	0.299609
Bbx	0.742912	0.752055	0.523254	0.402725	0.469517	0.29365	0.385047	0.668661
Bc1	0	0.378582	0.835627	0	0.418163	0	0	0
Bcam	1.50083	1.15035	0.906827	1.86081	1.83786	2.97629	1.57235	1.40025
Bcan	0.13208	0.138559	0.0198292	0.0571089	0.0654939	0.0887508	0.0436403	0.0496716
Bcap29	5.85483	4.22229	5.3079	4.37716	5.65208	4.11835	5.32334	5.42166
Bcap31	50.5933	49.2226	52.2818	67.7445	59.4326	63.9963	63.6544	46.5401
Bcar1	31.0067	23.4519	18.6178	25.6666	15.2309	20.9483	20.3902	24.2773
Bcar3	5.05901	4.71951	4.19892	4.59253	3.9458	3.87762	5.82839	4.37741
Bcas1	0.048422	0.0181153	0.0199926	0.0143947	0.0600279	0.0867668	0.0533309	0
Bcas2	10.0362	9.56296	10.0973	10.7407	12.4925	12.3868	11.6402	9.54115
Bcas3	4.50172	4.58435	4.81001	4.1815	3.2985	4.07839	3.9443	4.18125
Bcat1	0.0350599	0	0.108567	0.0625346	0.0434632	0.212029	0.13515	0.0894082
Bcat2	1.09059	1.09848	0.93521	0.847923	0.727994	1.05227	1.10876	1.61641
Bccip	11.8645	12.0561	10.9214	13.4665	13.7781	12.5709	12.0122	9.59801
Bcdin3d	1.98152	1.98984	1.89463	1.86018	0.90501	2.28924	1.30178	1.47754
Bche	1.58635	0.980523	0.598021	1.53777	0.627022	0.71064	0.886245	1.1335
Bckdha	44.7387	38.0244	38.578	55.8774	39.9984	48.4361	41.6737	34.3999
Bckdhb	34.4196	31.9813	32.6107	40.3098	28.5538	30.605	29.0922	34.7368
Bckdk	9.25891	8.45331	7.63578	10.9527	6.03642	8.31696	6.31403	10.4397
Bcl10	4.9453	5.21485	5.08213	6.44589	6.73693	7.66854	5.71598	4.89669
Bcl11a	0.0157005	0.0352425	0.058342	0.0980145	0.0389272	0.0422002	0.0864606	0.0800773
Bcl11b	0.0115506	0.051855	0.0429215	0.0206023	0.0429574	0.0776154	0.0508864	0.0196373
Bcl2	0.109863	0.205507	0.136082	0.0653192	0.408587	0.0492157	0.161335	0.0622597
Bcl2a1	1.9766	2.77302	1.75972	1.98313	2.68007	2.40734	2.85728	2.62533
Bcl2l1	3.66207	4.30757	3.5427	5.26268	5.58375	7.51116	5.77451	3.93552
Bcl2l10	0.0804027	0.0451196	0.0497953	0	0	0	0	0
Bcl2l11	0.803755	1.76843	0.912981	1.09236	0.633967	0.825147	0.951327	0.746225
Bcl2l12	1.38008	1.71839	1.45541	2.52608	1.13883	2.5768	1.74406	1.47932
Bcl2l13	5.11066	4.54916	4.58401	3.88986	3.4955	4.61834	3.15405	4.94354
Bcl2l14	0.0548967	0.0924192	0.135995	0.0244791	0.0340273	0.147553	0.151155	0.139995
Bcl2l15	0.0507956	0.05701	0.188753	0.0906016	0.125941	0.068265	0.0559451	0.0863578
Bcl2l2	5.44455	5.53261	5.28574	5.5883	5.71581	5.5372	5.42927	5.54544
Bcl3	3.40484	4.95968	6.72988	4.26405	11.5851	8.85956	4.01597	6.32228
Bcl6	10.1921	19.4749	14.4549	3.12454	1.54778	1.28412	4.65852	6.51952
Bcl6b	3.99374	4.42072	3.96086	3.68411	3.01141	3.72572	2.85683	4.57318
Bcl7b	5.3692	5.4429	4.87298	7.10535	5.52119	7.08274	5.01422	5.80503
Bcl7c	4.99198	7.17539	7.26809	8.90395	8.35987	11.7698	8.72937	6.92352
Bcl9l	8.76227	8.01843	6.91093	4.7736	3.60831	4.11491	4.03841	8.50876
Bclaf1	9.88194	9.62521	9.22186	7.70834	8.84571	8.97429	8.28885	10.0939
Bcmo1	1.07326	0.828136	0.858563	0.837514	1.24734	0.841381	1.13281	0.608217
Bco2	7.83461	6.09347	5.98007	7.53872	4.87752	5.63397	6.0175	6.74746
Bcor	2.49858	2.41121	2.15222	2.16823	1.84511	1.72872	1.43899	3.07997
Bcorl1	0.749523	0.918979	0.62413	0.578568	0.671501	0.812608	0.624333	0.663903
Bcs1l	3.27093	3.46552	3.14398	4.13061	3.73052	3.65735	3.37197	3.60348
Bdh1	102.24	83.731	89.4312	101.253	71.4989	83.0727	93.5187	84.1628
Bdh2	0.784344	0.796463	0.647683	1.73209	0.416716	1.25487	0.987267	0.38099
Bdkrb1	0.0658175	0.0369348	0	0	0.0407964	0	0	0
Bdkrb2	0	0.0632474	0.0279206	0.0301543	0.041916	0.100679	0	0.0574837
Bdnf	0.0667332	0.0491825	0.0281274	0.0569518	0.0396447	0.106812	0.105938	0.0772125
Bdp1	0.9447	0.785389	0.823438	0.686487	0.303626	1.12853	0.693647	0.951756
Becn1	12.9554	14.3242	12.7934	15.8936	13.3975	15.2902	13.853	13.2556
Begain	0.126336	0.017724	0	0.0704186	0.0195771	0.0636694	0.0521789	0.107392
Bend5	0.0470843	0	0.116642	0.0629864	0.0291848	0.0316386	0.0518575	0
Bend6	0	0.0292978	0.0646676	0.069841	0.129444	0.0701636	0.0287505	0.0443798
Bend7	1.13975	1.20394	1.03805	0.777289	0.706462	0.765861	0.849167	1.59574
Best1	0.0430043	0.0482654	0	0.0767046	0.0266558	0	0.686777	0.0365559
Best2	0.0215236	0.0241568	0	0.0191953	0.0266824	0	0	0.0365923
Best3	0.0728099	0.0490305	0	0.051947	0.0361045	0.0587102	0.0641529	0.0990275
Bet1	19.2409	18.7179	21.6139	20.2444	20.3303	15.1082	22.3821	22.6303
Bet1l	9.85545	9.44589	7.13069	7.56162	8.26145	10.0073	6.7195	8.77658
Bex1	0	0.0683476	0	0.271549	0	0.081841	0	0.207064
Bex2	0	0.0625271	0	0.397478	0.0690644	0.0748713	0	0
Bfar	10.5958	10.6921	9.63928	7.27301	6.44782	7.63787	7.03118	9.61506
Bfsp1	0.101258	0.0454582	0.050169	0.0361217	0.100422	0.0816491	0.200741	0.0344297
Bglap	0.0886576	0.0995041	0.219631	0	0	0	0	0.150727
Bgn	22.3344	24.8674	25.0454	22.0259	23.5245	24.404	29.3931	26.5826
Bhlha15	0.90691	0.784029	0.850096	0.349754	0.288667	0.39529	0.337449	2.12524
Bhlhb9	0.719871	0.682261	0.693518	0.756132	0.753592	0.816954	0.810468	0.897494
Bhlhe22	0.0554965	0.109	0.0859257	0.0742398	0.0515986	0.0745826	0.0458419	0.0707624
Bhlhe23	0	0.0218774	0	0.0173841	0	0.0261965	0	0
Bhlhe40	9.30398	5.73099	6.41492	13.6131	6.28512	11.3804	9.46664	12.234
Bhmt	1586.58	1714.1	1706.43	1122.26	885.742	621.362	814.855	1711.54
Bhmt2	248.082	228.373	218.189	224.652	188.521	167.881	191.011	248.238
Bicc1	0.240909	0.210297	0.414446	0.286465	0.199101	0.287788	0.294813	0.341309
Bicd1	0.0521579	0.0234156	0.0258421	0.0465157	0.0129318	0.0981341	0.0114891	0.0177348
Bicd2	2.7438	2.72104	2.58584	2.59808	2.6586	2.93302	2.43827	2.45217
Bid	4.42619	4.40532	3.1033	3.72395	4.50355	4.37715	3.67918	4.33042
Bik	0.0903269	0	0	0.0402779	0	0.182088	0.049742	0.0767826
Bin1	2.30562	2.48661	2.40962	3.42166	2.43396	3.00172	2.79726	2.57236
Bin2	1.74948	1.83765	2.27812	1.80027	1.80733	1.68801	2.32209	1.71594
Bin2a	0	0.0186021	0.0205298	0	0	0.0222746	0	0.0563564
Bin3	7.7185	7.79982	7.43594	7.70114	7.73545	8.18713	8.1427	7.44097
Birc2	7.13633	6.11596	7.1011	9.32019	11.4194	10.634	11.3457	8.60443
Birc3	2.04424	1.66524	1.57234	1.73489	1.9824	2.01615	1.87018	1.84982
Birc5	0.885163	0.551919	0.548202	0.964835	0.731548	0.859144	0.595771	0.668831
Birc6	6.10708	5.85283	5.24093	3.5906	4.82624	4.55056	5.07211	6.19003
Blcap	12.5178	13.949	14.3996	15.2431	11.4795	12.8645	12.8775	12.253
Bles03	7.77347	6.75264	6.32397	9.09001	7.32631	9.09619	6.71203	5.96675
Blk	0.799561	0.833281	0.707409	0.441423	0.448401	0.460518	0.482243	0.679668
Blmh	5.95535	6.83199	6.79298	7.22717	6.93885	7.69956	7.28556	5.7352
Blnk	0.0744847	0.167194	0.307534	0.243567	0.0307791	0.100101	0.109381	0.0844211
Bloc1s1	27.8912	31.0382	27.228	49.3969	42.5855	47.1191	51.6318	32.8175
Bloc1s2	7.57907	6.80504	8.41873	6.19231	7.57714	7.03137	7.5396	6.89982
Bloc1s4	4.94486	4.65589	3.86405	4.32116	3.70272	4.81686	3.76479	5.86782
Bloc1s5	3.39208	2.90968	2.94111	4.2568	3.8747	4.03767	3.76264	2.96582
Bloc1s6	3.70319	3.29713	3.07504	5.35057	3.28279	3.41979	3.32668	4.07996
Blvra	7.36961	8.04645	5.90365	9.21565	6.2065	7.4281	8.02849	7.96687
Blvrb	65.5459	65.3422	50.7577	95.001	79.0764	93.6018	83.9715	55.8004
Blzf1	1.7866	2.16114	1.96709	1.75267	2.01795	1.89416	1.61791	2.32868
Bmf	14.0882	11.3938	11.0348	11.7143	10.4276	8.38081	11.432	13.4199
Bmi1	5.99352	5.69848	5.296	4.59617	3.59672	5.48957	5.12954	5.71138
Bmp1	24.3288	27.0926	24.1812	25.8992	19.094	17.7719	21.2797	24.3943
Bmp10	0.954926	0.918644	1.14057	0.547474	0.761018	0.504169	0.638552	1.27559
Bmp15	0	0.100885	0.0742264	0.0267215	0.0742885	0	0	0
Bmp2	1.86372	3.29254	1.41075	2.09303	2.90943	1.53064	1.74856	2.69911
Bmp3	0.0200075	0.0673658	0	0.0178432	0	0	0	0.0340149
Bmp4	0.168767	0.347259	0.209043	0.200681	0.139479	0.529221	0.185876	0
Bmp5	1.16441	1.67278	1.3846	1.46421	1.31358	1.56487	1.62872	1.64308
Bmp6	0.283868	0.669052	0.703223	0.354425	0.316715	0.64854	0.437703	0.530865
Bmp7	0.62188	0.398835	0.418157	0.190152	0.418507	0.859634	0.27397	0.12083
Bmp8a	0.0449987	0	0	0.0200655	0.0278921	0.0302372	0	0
Bmper	0.148294	0.166436	0.169554	0.122079	0.183837	0.0766516	0.125636	0.213328
Bmpr1a	2.34684	1.97161	1.63194	1.50547	1.73539	1.64153	1.58713	2.33325
Bmpr1b	0.0575684	0.0323057	0.0356534	0.0513409	0	0.0386835	0.0317022	0
Bmpr2	2.23191	2.10417	1.99047	1.29381	1.67395	1.64972	1.70843	2.751
Bms1	4.41475	4.07537	3.47238	3.69111	3.47529	4.30146	3.28206	4.99118
Bmx	0.0591658	0.0332021	0.12825	0.0923398	0.0183367	0.178906	0.0651639	0.050294
Bmyc	2.78373	2.16788	1.97032	2.93859	3.31009	2.59587	2.06482	3.28387
Bnc1	0.0364587	0.0511489	0.0112899	0.00812871	0.0225986	0.0244987	0.0401548	0.0309918
Bnc2	0.0527698	0.0118451	0.0653632	0.00941229	0.0392507	0.0851018	0.0581195	0.0538285
Bnip1	3.27921	3.15462	3.23976	4.38672	2.66173	4.35452	4.25658	3.05298
Bnip2	2.62366	3.26471	3.28511	3.10284	2.61614	2.98941	2.44991	3.49082
Bnip3	33.4629	37.3771	38.1765	25.2976	33.9741	30.0168	26.6569	38.426
Bnip3l	17.6673	18.1625	18.8409	16.9358	20.8143	25.5028	23.0855	17.0718
Bnipl	0.0522399	0.0879464	0.0647068	0.0698833	0.0647609	0.245721	0.172607	0.222033
Bod1	3.30089	2.81112	2.51917	2.20888	2.88779	2.80675	2.40216	2.25041
Bok	0.41485	0.465603	0.197635	0.426892	0.474722	0.857728	0.492052	0.37977
Bola1	12.2284	12.0984	12.2035	15.609	14.2254	20.3283	14.1064	11.922
Bola3	2.72568	2.83746	2.74006	3.13541	2.59544	2.97293	2.95849	2.88781
Boll	0	0	0	0.0367772	0	0.0554205	0.0454187	0
Bop1	6.65989	7.70886	5.38463	5.59829	4.87178	5.81889	3.83031	7.65674
Bora	0.51795	0.674326	0.56457	0.609735	0.513675	0.501178	0.524821	0.669232
Bpgm	5.12307	3.93571	3.66488	4.86208	3.90569	4.67589	8.87099	5.40284
Bphl	31.619	23.5766	25.8847	29.0089	25.1855	30.2337	24.6573	26.9396
Bpi	0.0221986	0.0249144	0	0	0.0275192	0.029833	0	0.0754798
Bpifa1	0	0	0	0.0365329	0	0	0	0.0696434
Bpifa2	0.0448818	0	0	0.0400267	0.111278	0.0603173	0.0988635	0
Bpifa2f	0	0	0	0	0.0654339	0	0	0.0897361
Bpifa3	0	0	0	0	0	0.0531367	0.043547	0
Bpifa5	0	0	0	0.0354238	0	0	0	0
Bpifb1	0	0.0302676	0	0	0.0334322	0.0362431	0	0.0916979
Bpifb2	0	0.0701619	0.0516218	0.0185838	0	0.0280045	0.0459009	0
Bpifb3	0	0.0273622	0	0.0217423	0	0	0	0
Bpifb4	0.0411203	0	0.101867	0.0366721	0.025488	0.0552622	0.0226445	0
Bpifc	0.0387579	0.0434995	0.0480073	0.0172826	0	0.078131	0.042687	0.0329462
Bpnt1	8.13175	8.90156	8.11309	8.88134	8.72749	7.81455	8.41631	10.1887
Brca1	0.592933	0.475337	0.2003	0.315902	0.467758	0.258718	0.322281	0.17019
Brca2	0.133492	0.187279	0.113678	0.145094	0.0982583	0.168189	0.10108	0.106383
Brcc3	8.07113	7.89524	7.51374	8.27395	8.91028	8.54052	7.35477	9.18635
Brd1	3.2814	3.88745	3.45838	2.85798	3.12823	3.57178	2.84263	3.50709
Brd2	9.48615	9.34929	8.97486	9.39526	8.83464	12.5244	8.82028	9.3604
Brd3	10.4599	9.69788	7.16938	6.35411	5.03985	6.40815	5.55523	10.1918
Brd4	8.26466	8.5596	8.36743	8.63464	7.01293	7.80872	7.66314	9.03339
Brd7	7.59219	9.68652	8.57512	10.3107	7.1233	7.44311	8.48895	9.72968
Brd8	3.03911	3.21978	3.00177	3.42299	2.72821	3.46814	3.08751	2.67248
Brd9	2.86867	2.50188	2.12744	3.25905	2.83141	2.72569	2.87775	2.73363
Bre	9.9204	9.45763	8.8319	11.6372	9.64287	8.82499	10.7709	9.43904
Brf1	3.68268	4.0925	3.5953	3.20341	2.96861	4.46161	3.27679	4.102
Brf2	2.6678	3.07298	2.69575	3.04706	3.59734	3.4595	3.45374	3.06348
Bri3	35.2838	35.2366	43.3448	47.1488	41.7983	55.9975	48.8956	38.6753
Bri3bp	1.07366	1.29108	1.80484	1.50466	1.52113	1.54597	1.3092	1.04304
Brix1	2.75178	2.53052	2.83673	2.01078	2.61902	2.21889	2.09219	4.25575
Brk1	20.0601	19.8319	19.9944	21.8735	22.9739	24.9056	21.4896	20.1828
Brms1	10.717	12.2587	11.9175	14.5045	14.7713	19.0043	13.0857	11.0019
Brms1l	1.46526	1.22425	1.57295	1.14704	1.13024	1.55347	1.52415	1.63305
Brox	4.32926	4.32225	4.03382	4.36805	3.6527	4.65453	4.76815	4.43808
Brpf1	1.95526	1.98244	2.02408	1.57527	1.62764	2.10724	1.45646	2.15186
Brpf3	2.97079	2.27993	1.87624	1.97922	1.90692	2.79317	1.79764	2.35564
Brs3	0	0	0	0	0	0	0.0689179	0
Brsk1	0.106084	0.0992188	0.219001	0.157681	0.197266	0.332659	0.155785	0.150295
Bscl2	12.8996	13.371	15.879	14.0474	10.5728	15.939	13.6496	17.3542
Bsdc1	19.2142	20.3529	19.5959	23.4795	18.7836	21.9524	19.1988	18.912
Bsg	226.163	211.653	226.008	273.631	280.189	287.157	265.978	211.131
Bsn	0.0378953	0.0151898	0.0335278	0.026554	0.0335558	0.0181886	0.0536619	0.0230093
Bsnd	0.0480805	0	0.0794063	0.0142931	0.0596046	0.0861548	0.0353032	0.0544945
Bspry	1.08682	0.953645	0.832185	0.863514	0.955364	1.30125	0.761724	1.17581
Bst1	0.214807	0.309969	0.11403	0.0273672	0.266293	0.123721	0.270382	0.208683
Bst2	175.046	185.034	164.689	274.493	138.976	193.247	181.938	144.216
Bsx	0	0	0.0615422	0	0	0	0.0547219	0.0844697
Btaf1	2.54433	2.79189	2.55063	1.63854	1.849	2.1085	1.8246	3.44822
Btbd1	10.8443	10.962	10.39	8.46715	9.13449	8.66711	8.98547	10.8421
Btbd10	0.606515	0.744533	0.446059	0.524002	0.39944	0.662273	0.542751	1.28892
Btbd16	0.140335	0.0525011	0.0289708	0.0834359	0.0579901	0.031433	0.0772806	0
Btbd17	2.83955e-21	0	0	0.0222195	0	0	0	0
Btbd3	0.594169	0.484989	0.379134	0.449608	0.33481	0.629131	0.4561	0.612211
Btbd6	7.14209	6.44902	6.01464	7.48822	6.82229	8.34759	8.24496	6.36353
Btbd7	1.28615	1.527	1.1586	1.2039	1.21228	1.25707	1.29946	1.71674
Btbd9	3.35693	3.66847	2.87233	3.34832	2.19028	3.08677	2.74861	2.9662
Btc	0.211995	0.15862	0.437644	0.315104	0.175204	0.474839	0.466972	0.240275
Btd	24.4658	22.5959	22.7419	24.2002	17.1182	18.1752	19.9806	25.0013
Btf3	28.383	27.4654	30.0632	39.266	31.9533	35.0443	30.3767	26.8552
Btg1	68.2197	75.1736	95.9497	100.083	126.71	121.289	88.4714	84.8516
Btg2	4.11366	3.38575	4.24614	3.04193	5.67334	5.8509	3.22812	4.28361
Btg3	0.281968	0.316464	0.436573	0.377199	0.568019	0.615778	0.698743	1.3782
Btg4	0	0	0	0.0360878	0.0501639	0	0.0445673	0
Btk	0.475248	0.666738	0.323765	0.381454	0.353494	0.447085	0.444913	0.363587
Btla	0	0.104549	0.115383	0	0	0	0.153894	0.158369
Btn1a1	0.0822405	0.0307673	0	0	0	0	0	0
Btn3a2	0.0047324	0.028606	0.00293088	0.0336996	0.0315968	0	0.0561433	0
Btnl2	0.0280002	0	0	0	0	0.0376299	0	0
Btnl3	0	0.0445595	0	0	0	0	0.0437272	0
Btnl5	0.02221	0.0498544	0	0	0	0.0298484	0.0244616	0.0755187
Btnl7	0.0474987	0	0	0.0211802	0.0588833	0.0319171	0.026157	0.0807526
Btnl8	0.0223364	0	0	0.0199202	0.0276901	0.0300182	0	0
Btrc	1.40001	1.67604	1.24856	1.96441	1.55044	1.53028	2.42598	2.18975
Bub1	0.345948	0.172565	0.23806	0.334236	0.345476	0.245377	0.0952549	0.179712
Bub3	11.0941	11.5776	10.2058	12.2663	10.8176	14.1249	8.86043	11.5814
Bucs1	102.952	92.0711	98.0296	107.087	95.8252	105.347	104.733	98.5255
Bud13	1.69593	1.65708	1.8288	2.61568	2.05294	2.57413	2.13155	1.76387
Bud31	13.6717	13.5558	13.5831	15.5184	17.9155	23.0359	18.9124	11.6846
Bves	0	0.0356837	0.0393815	0.0283547	0	0.0427285	0	0
Bwk1	18.6162	20.1826	19.9943	21.3651	19.637	24.8158	20.7361	21.339
Bysl	3.66908	4.52395	3.52054	3.43348	2.33831	4.34061	2.21973	5.40318
Bzw1	18.8061	18.2435	17.8468	16.7284	16.6569	21.8125	15.5746	20.0756
Bzw2	2.90081	2.98153	2.11803	2.15131	2.76331	2.91357	1.78241	3.53004
C1H6orf35	7.59793	7.04665	6.36803	9.98145	7.83979	8.5601	9.37037	5.95587
C1d	1.00731	1.26993	1.28188	1.2183	1.31717	1.00139	1.04864	1.40756
C1galt1	9.17073	8.39302	6.67072	6.12029	7.47746	6.32777	6.16872	11.2487
C1galt1c1	5.94742	8.55584	6.51204	6.82787	9.40963	7.99283	9.84362	6.08908
C1qa	56.448	69.7377	56.7359	66.4435	66.0247	72.3289	69.1944	59.4119
C1qb	35.2713	50.0798	35.5375	41.3686	46.113	48.0488	46.7579	33.3593
C1qbp	18.7309	20.3098	21.0873	25.871	18.9403	19.7329	18.6192	18.7558
C1qc	37.9313	47.9405	37.0047	42.9962	39.7926	52.3299	48.3852	42.8726
C1ql1	0.0698645	0.0392059	0	0	0	0	0	0
C1ql2	0	0	0	0	0	0.060887	0.0498986	0.0770243
C1ql3	0.0562191	0.063097	0.0696356	0	0	0.151107	0	0
C1ql4	0.0494574	0	0.0612602	0.0441073	0.122623	0.0664665	0.0544712	0.0840826
C1qtnf1	2.36428	3.44327	2.19638	3.94093	3.07053	3.40435	3.25496	2.44042
C1qtnf2	0.284054	0.278955	0.571745	0.37999	0.220086	0.286309	0.273745	0.301826
C1qtnf3	0.269011	0.176121	0.33321	0.119955	0.250116	0.210891	0.271592	0.0381122
C1qtnf4	0.0642026	0	0.0795244	0	0.0397955	0.0431415	0	0
C1qtnf5	1.19665	0.907462	1.12168	1.21141	1.08253	1.4778	1.42482	0.714797
C1qtnf6	0.242983	0.251732	0.231516	0.416728	0.417077	0.326549	0.267616	0.19066
C1qtnf7	0.0969527	0.217628	0.20015	0.17293	0.280445	0.304025	0.284751	0.109886
C1qtnf9	0.0362521	0.122062	0.0449036	0	0	0.0974396	0.0399273	0.123265
C1r	271.485	252.897	239.431	288.721	258.929	261.178	304.423	253.702
C1rl	31.2591	26.3651	26.7401	32.4961	26.2984	21.6337	24.5669	28.4812
C1s	138.673	124.013	114.911	112.011	136.443	127.459	155.816	122.526
C2	53.5392	52.385	45.0186	53.071	50.6061	57.691	54.6937	48.8515
C2cd2	6.68054	6.15571	5.35513	5.99889	5.85852	5.20759	6.53463	7.60432
C2cd2l	7.96782	9.66847	7.73844	6.3907	4.50584	7.23143	6.16855	10.7533
C2cd3	1.1108	0.955348	0.76272	1.07678	0.673552	0.90056	0.970748	0.933973
C2cd4c	0.0811076	0	0.133952	0.120556	0	0.145336	0.119107	0.0459638
C3	1836.56	1723.59	1590.98	1755.63	1881.88	1807.9	1662.62	1645.71
C3ar1	0.575684	1.00506	0.448969	0.66553	0.475777	0.802325	0.657528	0.906224
C4a	312.97	294.569	250.999	283.674	257.104	224.206	274.786	278.006
C4b	55.8642	49.5545	40.8816	42.5565	40.7999	37.781	45.4742	47.0493
C4bpa	235.891	211.531	213.018	256.66	271.886	257.887	298.572	221.324
C4bpb	189.517	194.052	225.078	279.478	297.371	271.446	279.248	197.769
C5ar1	1.69947	2.07324	1.61691	1.84511	1.80147	1.65503	1.95313	1.67494
C6	94.5938	98.3179	88.109	87.4593	61.8398	57.2573	62.0132	98.9205
C8a	198.759	184.466	180.602	199.335	216.609	191.583	221.728	191.871
C8b	143.014	136.675	149.074	173.702	170.185	152.562	163.29	138.502
C8g	189.65	185.532	203.978	266.92	224.505	235.908	234.993	172.049
C9	397.591	389.251	368.63	469.803	487.64	461.079	482.457	387.232
CB741658	0.0531073	0.0447034	0.0164453	0.0236812	0.0329181	0.0356859	0.0438684	0.022572
Ca2	2.31143	1.59644	1.39481	1.58568	1.83682	1.87178	2.31729	1.76331
Caap1	1.84514	1.75228	2.49644	1.51896	1.79472	1.48783	1.53196	2.3165
Cab39	9.56347	10.7729	10.5102	9.37557	10.0831	11.876	9.84886	9.78323
Cab39l	5.21199	4.01513	4.27841	6.51846	5.0084	5.71963	5.7064	3.67021
Cabin1	1.4511	1.50849	1.44382	1.49037	1.21648	1.49459	1.25761	1.42562
Cables1	0.863526	0.670964	0.390816	0.636825	0.82346	0.848062	0.823039	0.762274
Cabp1	3.76408	3.18117	3.45391	2.69701	2.13146	4.43433	3.12182	4.26651
Cabp4	0.0897636	0.100745	0.0741235	0.0800534	0.111278	0.160846	0.065909	0.0508691
Cabp5	0.052977	0.0891874	0.0328099	0.0472462	0.0656747	0.0355983	0	0
Cabp7	0.721047	0.712149	0.714498	1.15749	1.00113	1.02717	1.04827	0.956166
Cabs1	0	0	0.0726139	0.052282	0	0.0393926	0	0
Cabyr	0.415956	0.536871	0.283373	0.333864	0.412523	0.195654	0.251969	0.0707169
Cacfd1	4.43802	4.95448	4.00589	5.36848	5.17983	4.75877	4.44594	4.33442
Cachd1	0.116614	0.185414	0.168517	0.173332	0.132517	0.117539	0.171248	0.13217
Cacna1a	0.0348758	0.027959	0.0308563	0.0622063	0.043235	0.0535659	0.0274367	0.0338814
Cacna1b	0.024455	0.0480124	0.0110817	0.0423277	0.0391387	0.0180448	0.0364586	0.0228274
Cacna1c	0.0313743	0.0410814	0.0323847	0.0326438	0.0324118	0.0281096	0.074869	0.0177799
Cacna1d	1.55785	1.29919	1.29312	1.45687	1.25397	1.31578	1.63238	1.79326
Cacna1e	0.0247606	0.0138949	0.0153348	0.0276026	0.00767382	0.00831904	0.0204531	0.0420956
Cacna1f	0.0506339	0.0243551	0.0358386	0.0129019	0.0538029	0.0583266	0.0318669	0.0491902
Cacna1g	0.0972567	0.102734	0.0496039	0.0714297	0.0780143	0.0615082	0.0504077	0.0291788
Cacna1h	4.34403e-44	0.0246263	0.0203837	0.0244605	0.0316809	0.0294881	0.0241664	0.0373036
Cacna1i	0.0197212	0.00737797	0	0.0234505	0.0162987	0.0176691	0.0289606	0.0223521
Cacna1s	0.0143229	0.00803757	0.017741	0.025547	0	0.00962436	0.0157749	0.0365255
Cacna2d1	0.0987827	0.103924	0.162842	0.146578	0.135816	0.0589166	0.0965305	0
Cacna2d2	0.12329	0.0968616	0.0763566	0.0659721	0.0764205	0.115984	0.0271578	0.0419213
Cacna2d3	0.0660996	0.0296745	0.0491244	0.0117899	0	0.0177665	0.0291202	0.0449505
Cacna2d4	1.43836	1.58576	2.04965	0.964913	0.64697	0.410556	0.799098	1.99091
Cacnb1	0.0661401	0.044539	0.0327697	0.0235942	0.0327971	0.0355547	0.014569	0.067467
Cacnb2	0.221872	0.16186	0.178634	0.356168	0.192536	0.372721	0.488729	0.207463
Cacnb3	0.137013	0.230663	0.190925	0.213836	0.297243	0.276201	0.396121	0.291171
Cacnb4	0.125314	0.204574	0.126998	0.223516	0.112981	0.122481	0.100376	0.213046
Cacng1	0	0	0	0.0468439	0	0	0.0578508	0.0892995
Cacng2	0	0	0.0477501	0.0343801	0	0	0	0
Cacng3	0	0	0	0	0	0	0.0501618	0
Cacng4	0.0877567	0.147739	0.163049	0.0782636	0	0	0	0.0745977
Cacng5	0.0521453	0	0	0	0	0	0	0
Cacng6	0	0.0618882	0	0	0.0683587	0.0741063	0	0
Cacng8	0.0341045	0.0382768	0	0.0608305	0	0	0	0
Cactin	3.27774	3.21189	3.09134	3.75412	3.09392	3.62239	3.24352	3.56413
Cacul1	7.71824	8.19077	7.50931	7.31495	7.3577	8.71235	7.4346	9.09432
Cacybp	13.381	13.0453	14.2567	16.7372	17.2559	18.5925	15.2995	13.688
Cad	2.64209	2.50284	1.95906	2.46436	1.81046	2.49203	1.62849	2.82284
Cadm1	7.67794	7.44466	7.85499	7.06407	5.60249	8.39195	6.02111	7.72458
Cadm2	0	0.0858432	0	0	0	0.0513953	0	0.065017
Cadm3	0.471278	0.488247	0.808264	0.905255	0.629176	0.584637	0.4392	0.986118
Cadm4	0.858841	0.701027	0.725318	0.905197	0.532345	0.839425	0.81692	0.66369
Cadps	0.0866	0.013885	0.107267	0.0661989	0.0920199	0.0665046	0.12263	0.105164
Cage1	0.271075	0.270435	0.205191	0.335766	0.26137	0.222629	0.348316	0.281634
Calb1	0.303702	0.908952	0.438876	0.112854	0.188247	0.0340125	0.0557484	0.387243
Calb2	0.0300252	0	0.0371906	0	0.0744435	0.0403514	0.0330691	0.102092
Calca	0	0	0	0	0	0	0.049671	0.076673
Calcb	0.113771	0	0.140923	0	0	0	0.0626526	0
Calcoco1	6.43176	6.08403	6.33341	7.63058	5.86649	6.45819	5.93812	4.88199
Calcr	0.0125597	0.0281925	0.015557	0.0112011	0	0.0337583	0	0
Calcrl	2.10314	2.08274	1.30252	1.50786	1.32918	1.6349	1.27172	2.55898
Cald1	42.1447	37.374	35.7975	40.0887	37.8586	36.4136	37.8455	43.9754
Calhm1	0.0412381	0	0	0	0	0.0554205	0	0
Calhm2	0.683094	0.793101	0.55435	0.609201	0.759218	0.981333	0.959888	1.00115
Calhm3	0	0	0	0	0.0517149	0	0.0459453	0
Calm1	49.2549	56.2841	52.336	73.3442	59.3244	62.7506	67.6708	51.9249
Calm2	44.6255	45.5981	43.8859	60.7891	51.9142	50.302	51.6813	44.4333
Calm3	19.6059	16.6652	16.3387	18.5136	20.5521	24.3144	20.2439	20.9551
Calml3	0.0313781	0.0352169	0.194332	0.0559676	0.0777978	0.463865	0.345591	0.053346
Calml4	1.01194	1.46024	1.61157	1.8909	1.07528	2.39613	1.3799	1.96618
Caln1	0.219727	0.246608	0.204123	0.195958	0.204294	0.295294	0.121001	0.0933895
Calr	292.649	316.968	272.562	470.74	343.306	313.772	416.379	286.886
Calr3	0.804143	0.833097	0.766191	0.992983	0.805174	1.2054	0.885664	0.736145
Calu	25.8212	26.4554	24.0807	30.3231	27.3793	28.3992	29.2347	29.6673
Caly	0.0885718	0	0.109709	0	0	0	0.0922471	0
Camk1	11.2422	9.85538	12.8714	13.0068	14.6525	18.0895	14.1556	11.6228
Camk1d	2.53921	2.66423	2.57881	2.99334	2.82218	2.36651	2.70019	3.12604
Camk1g	0.0182409	0.0204725	0.0225941	0.0162677	0.0452259	0.0735428	0	0.0620229
Camk2a	0.0945466	0	0.0390366	0.0281063	0	0	0	0.0535797
Camk2b	0.0691342	0.0730941	0.0999049	0.0205519	0.0538209	0.0619403	0.0380714	0.0738101
Camk2d	0.713037	0.88451	0.627537	0.485296	0.418708	0.655653	0.495993	0.829425
Camk2g	0.716509	0.655247	0.295834	0.852001	0.493469	0.463632	0.555325	0.766976
Camk2n1	4.32818	4.26529	6.01488	5.46046	7.45946	6.95168	9.53393	3.40997
Camk2n2	0.995418	1.53615	0.154121	0.44387	0.308501	0.668879	0.548166	1.26924
Camk4	0.0491757	0.0275959	0.0609113	0.0877123	0.0914434	0.066088	0.0812415	0
Camkk1	0.367081	0.454609	0.203823	0.248351	0.42368	0.306202	0.348529	0.258238
Camkk2	0.486315	0.498349	0.419041	0.65999	0.314544	0.284159	0.209589	0.575155
Camkmt	0.177802	0.432368	0.367057	0.290709	0.257155	0.398252	0.228465	0.453423
Camkv	0.0354388	0	0.0292641	0.0210701	0.0146443	0.0476268	0.0130105	0
Camlg	2.73026	2.2804	2.32009	2.34998	2.55818	2.55994	2.86719	2.48279
Camp	0.0738056	0	0.091419	0.0658217	0.0914956	0	0.0812878	0
Camsap1	1.38143	1.53581	1.17033	0.976299	1.03399	1.35737	1.04063	1.6285
Camsap2	1.72515	2.14247	1.74767	1.76588	1.91082	1.9201	1.81516	2.06616
Camsap3	2.58578	2.2117	2.51838	2.7152	1.78373	2.69038	1.76847	2.12714
Camta1	2.16807	1.44372	1.47781	2.33195	2.04198	1.81331	1.65307	1.40219
Camta2	4.55306	4.65149	4.18153	4.81538	3.63024	4.06621	4.11458	4.64772
Cand1	8.98808	8.64975	8.13006	7.02261	7.5382	8.41042	8.14084	9.53366
Cand2	0.0300601	0.0562294	0.0620563	0.0714889	0.0993732	0.107729	0.0882866	0.0170351
Cant1	6.75437	7.5263	6.76508	8.09888	7.95261	8.72985	8.13319	7.77447
Canx	69.5964	74.5829	77.2062	89.0126	88.9291	82.9182	96.1654	74.0078
Cap1	23.4925	25.5722	22.3773	25.1595	23.3362	23.0334	23.1456	27.1326
Cap2	0.0527827	0.0296201	0.0326896	0	0.0327169	0	0.0290668	0
Capg	2.51399	4.1339	2.5346	2.73737	2.71792	3.6143	3.21959	2.33581
Capn1	3.35521	3.96388	3.39036	3.66158	2.49929	4.05425	3.30637	3.22738
Capn10	1.59701	1.77105	1.36585	1.81423	1.39056	1.86519	1.63327	2.32721
Capn11	0	0.0184956	0.0204123	0.0293937	0	0.0442941	0.0363003	0
Capn12	0.0956754	0.182059	0.222997	0.11773	0.144726	0.0443293	0.107161	0.162933
Capn13	0.0502439	0.0187969	0.0622345	0	0.0622865	0.0225079	0	0.0569466
Capn2	3.30613	3.62783	4.04945	3.68287	4.34233	3.74943	3.9797	4.05363
Capn3	0.0413302	0.0618487	0.034129	0.0122864	0.0683151	0.0185148	0.0455201	0.0234219
Capn5	0.241771	0.429637	0.224602	0.539044	0.399626	0.56861	0.199711	0.376783
Capn6	0.0617863	0.0416072	0.0306126	0.0330616	0.0306382	0.0332142	0.02722	0.0210086
Capn7	4.14922	3.78025	3.7941	3.71126	3.67624	3.49332	3.52148	4.41919
Capn8	0.017908	0.0200989	0	0	0	0.0240669	0.0197235	0
Capn9	0.0177388	0.039818	0	0.0316398	0	0	0.0195371	0.0301578
Capns1	9.47686	7.50094	8.76006	9.55547	7.3646	10.2649	9.23026	8.23617
Capns2	0.320503	0.102775	0.113426	0.0408332	0	0.184598	0.100855	0
Caprin1	36.7156	37.0218	34.7588	26.8767	22.823	21.9712	28.0866	36.5012
Caps2	0.483891	0.444347	0.408661	0.765014	0.654405	0.325154	0.508722	0.48612
Capsl	0.0910892	0.0511165	0	0	0	0	0	0
Capza1	8.05527	8.89008	7.84525	7.33672	6.80293	7.19398	8.29208	10.8321
Capza2	26.5124	27.0451	28.2475	29.3552	30.5459	26.7732	29.1589	25.5291
Capza3	0	0	0.0440528	0	0.0881794	0	0	0
Capzb	22.491	23.9014	24.7666	30.6672	22.7464	28.2632	26.3503	22.7526
Car1	0.288082	0.242495	0.312228	0.513837	0.535695	0.290368	0.356948	0.55099
Car11	0.0326598	0.0366554	0.121362	0.0582537	0.202439	0.307244	0.143883	0
Car12	0.0810822	0.0455009	0.100432	0.180778	0	0.0544838	0	0.0689241
Car13	0.0217842	0.0244493	0.0539658	0.0194277	0.108022	0.146381	0.0719778	0
Car14	14.9456	11.8518	13.2382	21.3034	13.6188	15.3361	15.9918	14.6953
Car15	0.0392512	0	0	0.0350052	0.097318	0	0	0.066731
Car3	657.927	574.553	531.134	1115.85	472.514	577.793	683.416	919.382
Car4	0	0	0.0422434	0	0.0422788	0	0	0.0579812
Car5a	21.1549	17.7465	20.8376	24.2109	19.5572	17.9995	25.6454	17.4918
Car5b	0.758337	0.466739	0.606007	0.763569	0.63684	0.920514	0.619676	0.582243
Car6	0.533816	0.387668	0.855682	1.09216	1.08996	0.801804	1.17586	0.960927
Car7	0.799032	0.928814	1.02507	1.50154	0.31839	0.958778	0.880036	0.679219
Car8	14.3408	14.7482	13.2652	22.8893	17.9688	23.1605	19.1162	15.4865
Car9	0.125088	0.0935944	0.23241	0.092964	0.10338	0.196126	0.2985	0.0354438
Card10	3.45521	3.41257	3.0472	3.31563	4.02636	5.6465	3.56194	2.70214
Card6	6.21315	4.86985	5.07172	5.70455	5.01283	4.31186	5.60903	6.06073
Card9	0.593081	0.585762	0.705233	0.528924	0.676414	0.605758	0.653205	0.766307
Carhsp1	25.2822	21.3614	23.7866	36.157	28.8007	28.9074	33.2701	21.83
Carkd	17.1152	16.8222	15.9311	22.5495	18.1625	21.3682	17.0285	16.0697
Carm1	5.72498	4.88886	4.51736	4.61488	3.73902	5.27627	4.43664	5.79431
Cars	5.00089	5.48217	4.80781	5.8342	4.25316	5.88068	4.14691	5.31377
Cars2	8.20014	8.02275	7.46235	11.0229	5.83854	5.42983	7.26729	8.53537
Cartpt	0	0	0.0636668	0	0.12744	0.0690777	0	0
Casc1	0.161306	0.18104	0.155401	0.143857	0.288843	0.192695	0.276358	0.213296
Casc3	4.33865	3.73253	3.43277	3.13636	3.00915	3.67314	2.54713	4.54917
Casc4	0.0892533	0.16278	0.110553	0.119397	0.207461	0.0299872	0.0860138	0.0758699
Casc5	0.0960184	0.101778	0.0660738	0.076117	0.105807	0.121872	0.0587514	0.0725517
Cask	0.951782	0.790763	0.750222	0.804728	0.842791	0.79737	0.735151	1.28189
Caskin1	0.124196	0.13939	0.09954	0.0521228	0.10868	0.127636	0.112648	0.198725
Caskin2	3.28313	3.21799	2.66359	2.77803	2.21603	2.68779	2.23196	3.02403
Casp1	2.42079	2.38198	1.93054	2.15892	2.5488	2.98594	2.15488	2.70614
Casp12	6.58338	5.62599	5.75367	3.99362	6.29705	6.87141	4.23269	8.12445
Casp14	0	0.0653961	0	0.0519645	0.0722333	0.156613	0	0
Casp2	1.22367	1.40229	0.909418	1.02238	1.34132	1.2983	1.51796	1.02923
Casp3	8.36858	8.66385	8.47511	8.65244	10.0264	8.77099	10.4536	11.0061
Casp4	5.14003	5.72908	5.44461	6.32277	1.7578	3.43007	3.2405	6.62927
Casp6	7.3231	5.51988	6.19063	8.0874	8.12015	10.0171	7.60812	5.43917
Casp7	7.52314	6.15449	6.8161	8.4081	6.48787	6.56792	7.35339	6.83666
Casp8	1.98313	1.74189	1.7088	2.38378	1.95073	1.76712	1.99425	1.42924
Casp8ap2	0.764069	1.0362	0.820223	0.749558	0.781443	0.881375	0.911656	1.09332
Casp9	1.87803	1.65317	1.68765	1.87192	1.50646	1.78159	1.64257	1.81554
Casq1	0.280214	0.209664	0.289238	0.166601	0.115792	0.439348	0.282903	0.277896
Casq2	0.0175728	0.0197226	0.0435329	0	0.0217847	0.141698	0	0
Casr	0.0840005	0.0235693	0.0390176	0.103006	0.052067	0.0141112	0.0925163	0.0357024
Cass4	0.0713363	0.0200159	0.0662703	0.0636195	0.110543	0.047935	0.0392841	0
Cast	15.1595	15.4854	14.6995	16.1091	18.2592	13.7533	18.3303	14.5232
Cat	511.641	552.19	580.894	387.148	423.839	558.102	666.814	496.496
Catsper2	0.293052	0.438538	0.411386	0.609819	0.508608	0.577627	0.710073	0.398575
Catsper3	0	0.0382466	0	0.0303912	0	0	0.0375322	0
Catsperd	0.0546535	0.163573	0.0676964	0.0812356	0.067753	0.122416	0.180582	0.0929166
Catsperg1	0.451045	0.430292	0.446948	0.573211	0.321513	0.409162	0.471932	0.383412
Cav1	0.655958	0.654217	0.871315	0.833807	1.05075	2.34634	2.56916	1.10048
Cav2	1.53392	1.44769	1.3818	1.60117	1.70709	3.13903	2.38055	1.77806
Cav3	0	0	0.0394687	0.0852524	0	0.128469	0.0350947	0
Cb707485	0	0	0	0	0.139026	0	0	0
Cbfa2t2	1.69449	1.43567	1.25521	1.30377	1.27685	1.56282	1.1527	1.63811
Cbfa2t3	0.289558	0.63191	0.478213	0.631241	0.299133	0.497236	0.442934	0.410232
Cbfb	4.72798	4.68899	4.47509	4.25631	5.01335	4.236	3.97916	4.62567
Cblb	2.79052	2.21245	2.60028	1.81512	1.80902	2.16756	2.00195	2.4809
Cblc	0.234229	0.0584189	0.290127	0.185681	0.129053	0.559617	0.286639	0.044246
Cbll1	2.42299	1.97667	1.83776	1.85627	2.30243	1.92222	1.75166	2.48612
Cbln1	0.0176662	0.0198275	0	0.0472656	0.0438011	0	0.0389144	0.0300344
Cbln2	0.0366522	0.0205681	0	0	0.0227185	0	0.0605518	0.0623125
Cbln3	13.5353	14.6081	11.0076	14.2415	9.49143	9.88524	10.5105	13.5279
Cbln4	0.014873	0	0	0.0265282	0.0184378	0.0399761	0	0.0505712
Cbp	0.90107	0.716343	0.744071	0.569215	0.651607	0.353197	0.868366	0.957445
Cbr1	1.65895	2.44953	2.16224	2.37415	1.73147	2.81619	2.8355	1.63233
Cbr3	0.220475	0.247448	0.27309	0.294937	0.59219	0.395066	0.0809419	0.0624716
Cbr4	9.33014	9.50768	10.5413	13.4735	11.8568	7.81715	12.5118	9.82262
Cbs	97.8012	99.1834	88.4341	97.4165	94.1936	100.297	78.2943	99.1232
Cbwd1	1.47156	1.01907	1.00833	1.75914	1.20324	1.1361	1.13797	0.95814
Cbx2	1.0938	1.29223	0.94125	1.71479	1.32742	1.31524	1.59779	0.978722
Cbx3	1.73409	1.74879	2.17905	3.49644	3.27131	2.73577	2.79563	1.87997
Cbx5	4.01294	3.71154	4.09616	3.34688	3.86927	4.74389	3.51944	5.30632
Cbx6	1.49078	1.05756	1.42846	1.61799	1.27274	1.64436	1.9517	1.29115
Cbx7	0.9865	1.13752	1.0378	0.927993	0.98841	0.99887	1.13116	0.941962
Cbx8	1.78046	1.85555	1.26021	2.18331	1.65541	2.69189	2.13605	1.29728
Cby1	3.06412	2.08424	2.76027	3.89197	3.91365	3.86835	3.78382	2.68359
Cc2d1a	3.55569	3.69065	3.41081	4.19629	3.08224	3.88033	2.72364	3.45431
Cc2d1b	3.64417	3.69978	3.65254	4.06532	3.87908	5.03589	3.24775	3.41516
Ccar1	2.59758	3.10099	2.77162	2.62894	3.13575	2.95487	2.61447	2.59677
Ccbl1	15.4484	15.7653	13.6625	16.3588	12.7296	16.7892	13.7593	13.5723
Ccbp2	2.89207	2.61394	1.77527	0.844523	1.20566	0.928679	0.90202	2.17558
Ccdc101	5.8288	5.29582	5.50081	6.7935	6.0789	8.08209	5.77434	5.08586
Ccdc102a	0.39439	0.421561	0.628083	0.284731	0.558764	0.681462	0.310265	0.542788
Ccdc103	0.0903269	0	0	0	0	0.121392	0.049742	0.153565
Ccdc104	4.66447	5.97341	5.3332	5.46653	5.523	5.62572	4.80803	4.57505
Ccdc105	0.0254128	0	0	0	0	0	0	0
Ccdc112	0.855746	0.763985	0.963606	0.641761	0.819751	1.09778	0.771136	1.12421
Ccdc114	0	0.0374197	0.0619461	0.0446012	0.020666	0.0896143	0.110162	0
Ccdc115	1.92865	2.70784	1.66486	2.25421	1.70306	2.12951	1.77244	2.60251
Ccdc116	0.0659515	0	0.0272302	0.0196057	0.027253	0.0295444	0	0.0373748
Ccdc117	2.78683	3.83263	3.42759	2.94043	3.47912	4.19364	3.89073	3.90377
Ccdc12	7.61308	7.52869	6.59435	8.83114	7.39185	8.65728	7.56397	5.9737
Ccdc120	0.791636	0.432236	0.636037	0.457947	0.450904	0.833862	0.848325	0.581995
Ccdc124	7.28113	7.59897	6.38966	11.5493	10.625	12.1683	8.28559	6.53192
Ccdc125	2.9954	3.14304	2.70035	3.193	3.05417	4.00174	2.40109	3.3749
Ccdc126	2.13404	3.2933	2.36011	4.11226	3.18882	1.81809	4.5119	3.36895
Ccdc127	4.30385	3.51652	3.62505	2.85569	2.73173	3.42414	3.10955	3.33655
Ccdc129	0	0.0308064	0.0169994	0.0122396	0.0340273	0.0553324	0	0.0699976
Ccdc130	2.16576	2.55537	2.30429	2.74864	1.75548	3.1718	1.86544	2.54908
Ccdc132	3.27334	3.19401	2.5265	3.19156	3.33111	2.72481	3.34959	2.69945
Ccdc134	1.79901	1.86379	1.30272	2.09807	1.40674	1.78539	1.40221	1.50573
Ccdc135	0	0	0	0.0410654	0	0	0.0169049	0.0260946
Ccdc146	0.196372	0.224382	0.204213	0.308807	0.813937	0.287334	0.516107	0.218125
Ccdc148	0.0369028	0.16567	0.0685643	0.148099	0.0228739	0.272768	0.182898	0.0627386
Ccdc150	0.104385	0.102511	0.0808101	0.0581833	0.0647022	0.0701424	0.0143709	0.0887327
Ccdc152	1.67579	2.26803	2.07571	2.59342	2.87177	2.31836	3.47422	1.5083
Ccdc153	0	0.0355007	0	0.0846279	0.0392124	0.0850187	0.104513	0
Ccdc163	0.380408	0.914886	0.504847	0.605816	0.976855	0.803371	0.808018	0.785318
Ccdc164	0.0175871	0.0394774	0.108921	0.0156846	0.0436048	0.0236355	0.03874	0
Ccdc166	0.0253059	0	0.0313451	0.0677053	0.0313713	0	0.0278713	0.0430227
Ccdc167	3.55458	3.67029	3.34618	4.43809	3.87776	3.88534	4.48912	3.14244
Ccdc169	0.038024	0.0426759	0.0235492	0	0.0235689	0	0	0
Ccdc17	1.96994	2.05139	1.66025	2.49943	1.86305	2.18345	2.34859	1.7954
Ccdc172	0.0341584	0	0	0	0	0.0918121	0	0.0580729
Ccdc173	0.147108	0.0825528	0.212584	0.131195	0.0911838	0.0659004	0.0810108	0.0833664
Ccdc174	1.40924	1.28168	1.47469	1.36514	1.56629	2.08982	1.44507	1.77624
Ccdc175	0.0666301	0.205649	0.0825311	0.148556	0.10325	0.156704	0.183462	0
Ccdc176	1.35714	1.04408	1.11989	1.33139	1.2741	1.25469	1.51598	1.44985
Ccdc19	0.0958408	0.161349	0.148391	0.170946	0.0594061	0.193203	0.0791676	0.162939
Ccdc22	3.16466	3.05806	3.17754	3.69377	3.36688	4.42895	3.55492	3.0959
Ccdc23	1.99824	2.08251	1.06076	1.71844	2.47719	3.16497	2.58024	1.33462
Ccdc24	0.109307	0	0	0.0487414	0.0338765	0.0367249	0.120388	0
Ccdc25	4.85557	5.54005	4.74159	4.33032	4.34593	4.79257	4.7043	6.13128
Ccdc27	0.0225228	0.101113	0.0557957	0.100432	0.0837635	0.0302688	0.0992245	0
Ccdc28a	4.97772	4.65558	5.13803	6.62671	5.14233	6.44725	5.52207	3.61808
Ccdc28b	3.56204	3.45267	3.14196	2.45474	5.35249	5.87506	4.69589	2.93617
Ccdc32	1.88209	1.84046	1.45414	2.04411	1.33986	1.32729	1.60085	1.45731
Ccdc33	0.0434223	0.0324898	0.0537849	0.0129084	0	0.019452	0.0159415	0
Ccdc34	0.290117	0.153228	0.295938	0.350052	0.38081	0.389893	0.394712	0.145067
Ccdc39	1.06153	1.06599	0.968843	0.498262	0.858836	0.946064	0.898394	1.13982
Ccdc40	0.0283061	0.0741279	0.0350613	0.0252441	0.0350906	0.0126803	0.0727433	0.0641645
Ccdc41	1.46224	1.85755	2.50781	2.45049	1.93223	2.11629	1.76976	2.29473
Ccdc42	0	0.0732001	0.0403929	0	0.0808533	0	0.0359164	0
Ccdc43	2.95028	2.8018	2.83447	2.901	3.63397	2.71954	3.14523	2.6365
Ccdc47	20.3432	20.7212	19.7352	19.5718	19.2427	20.6826	20.9176	22.2239
Ccdc48	0.127816	0.114763	0.0633276	0.0227979	0.0633806	0.137419	0.0563095	0
Ccdc50	3.50649	3.79323	2.61645	2.71273	3.40423	2.55493	4.09461	4.45309
Ccdc51	2.75045	3.11909	2.80354	3.50052	2.94795	3.69637	2.20885	3.3122
Ccdc53	10.5136	10.3073	11.8387	13.49	13.7547	13.3475	15.012	9.96149
Ccdc58	5.39703	5.4994	5.27765	7.12482	5.8983	6.10792	6.1006	4.70849
Ccdc59	2.68919	2.95021	2.53746	2.18082	2.57365	3.7976	2.79257	2.78739
Ccdc60	0.0194138	0.0217889	0.0240468	0	0	0.0260905	0.0427638	0
Ccdc61	0.910717	0.766601	1.28188	1.08909	0.821091	0.834496	0.843468	0.774157
Ccdc62	0.715876	0.786718	0.720458	0.505429	0.425241	0.601298	0.624189	0.557821
Ccdc63	0.0252937	0.0851643	0.12532	0	0.0313561	0.0679851	0.0278579	0
Ccdc64	0.750139	1.00382	0.696868	0.926298	0.876285	1.20199	0.762633	0.490506
Ccdc64b	0.109807	0.0739448	0.0816075	0.0587574	0.136126	0.295144	0.193503	0
Ccdc65	0.0471357	0.158707	0.233538	0.0210184	0.116867	0.0633464	0.0519141	0
Ccdc67	0.0666558	0.0561079	0.0412815	0.0891679	0.082632	0	0.0550599	0.0566609
Ccdc68	0.0935902	0.0350134	0.154567	0.111288	0.232044	0	0.137437	0.0530377
Ccdc69	0.120268	0.0337455	0.111727	0.0268145	0.0745472	0.0808151	0.132461	0.102234
Ccdc7	0.0231757	0	0.0287065	0.0206686	0.0861915	0.0622923	0	0.039401
Ccdc71	2.55372	2.54112	2.80445	2.88793	2.12141	2.72436	3.04457	2.95407
Ccdc75	1.3894	1.5888	1.65603	1.94048	1.68992	2.46616	1.47251	2.00558
Ccdc77	0.477575	0.456594	0.372455	0.930699	0.899025	0.499193	0.564952	0.45107
Ccdc8	0.051879	0.0873388	0.0481948	0.0694005	0.0321567	0.069721	0.0285692	0
Ccdc80	6.46011	7.92462	6.95751	7.74437	7.7472	9.36166	9.80781	9.56744
Ccdc81	0	0.0471845	0.0520741	0.11248	0.0521177	0.0282499	0.0463032	0.107212
Ccdc82	0.628226	0.560862	0.636668	0.789469	0.708001	0.556459	0.912068	0.485477
Ccdc85a	0	0.0858179	0	0	0.0315968	0.10276	0.0280716	0.0433318
Ccdc86	3.78739	5.43151	2.39775	2.1392	3.02577	3.90228	2.7809	5.22271
Ccdc87	0	0.0179676	0.0198295	0.0142772	0.0595383	0.0645442	0.0352639	0.027217
Ccdc89	0.0341855	0	0	0.0304875	0	0	0	0
Ccdc90b	2.74038	2.76808	2.30063	3.23144	3.28397	2.9872	2.95113	2.5883
Ccdc91	5.08996	5.07793	5.53847	5.68995	4.33808	5.62914	6.11206	5.73892
Ccdc92	0.243184	0.173686	0.164301	0.177446	0.137033	0.297108	0.146093	0.0751707
Ccdc93	1.70672	1.89514	1.48431	1.34397	1.64311	1.56166	1.4398	1.23472
Ccdc94	2.56679	2.43581	1.68014	2.90328	3.20787	3.14105	2.39031	2.48347
Ccdc97	4.3469	4.58302	3.517	4.15078	3.32036	3.93392	3.15948	4.35448
Ccer1	0	0	0.0308599	0	0	0.0669651	0.10976	0
Ccin	0	0.0256666	0	0	0.0283501	0.0307337	0	0.0388793
Cck	0	0	0	0.109703	0.0762463	0.165314	0	0.104564
Cckar	0	0	0	0.0256363	0.0712715	0	0	0
Cckbr	0.0201288	0.0451827	0.0249325	0.0179514	0	0	0.0221694	0.0684421
Ccl1	0.191045	0	0	0	0.355254	0.128374	0	0
Ccl12	0.159912	0	0.198075	0.0713068	0.495601	0	0.176124	0
Ccl17	0.153107	0	0.189646	0	0	0.411527	0.168629	0
Ccl19	0.84541	1.28771	0.897569	0.969374	1.04804	0.892696	0.997623	0.513316
Ccl2	0.166063	0.49701	0.274257	0.0987325	0.686217	0.669522	0.975453	0.376432
Ccl20	0.0542416	0.0608775	0	0.048374	0	0.0728961	0	0
Ccl21	2.62767	2.13958	2.36129	2.43532	4.02395	8.03214	3.00755	2.27746
Ccl22	0.123714	0.166619	0	0.132398	0	0.0332523	0.0545024	0.0420654
Ccl24	1.6845	1.89058	2.1231	2.53015	3.70022	2.4624	3.71053	1.90921
Ccl25	0.032366	0.0726514	0	0.202054	0.0401236	0	0	0
Ccl26	0.0844937	0.0948307	0.104658	0.226061	0.104745	0.227105	0	0.287296
Ccl27	0.621241	0.406726	1.026	1.20042	0.513428	0.904471	0.969313	0.440073
Ccl28	0.0642026	0	0.0397622	0.0286288	0.159182	0.0862829	0.0353557	0.0545756
Ccl3	0.687156	0.835491	0.993	1.02137	1.20679	1.30826	1.95511	0.778824
Ccl4	1.08328	1.38949	0.76674	1.38013	0.191846	2.07976	1.87486	1.57858
Ccl5	5.77711	8.70205	6.49671	8.54175	7.53872	7.55963	7.19998	6.7201
Ccl6	71.3401	107.778	69.0017	64.7294	62.7533	56.1911	70.2369	80.3649
Ccl7	0.0535022	0.0600477	0.198811	0.0477146	0.0663258	0.431415	0	0.0909593
Ccl9	236.213	224.21	232.176	299.323	268.33	234.892	304.947	216.169
Ccm2	11.3877	13.2431	12.3346	14.7584	13.8768	16.5414	13.1025	13.6757
Ccna1	0.0749155	0	0	0.0222705	0.0309571	0.06712	0.0550068	0
Ccna2	0.353077	0.198136	0.562291	0.314883	0.531497	0.372826	0.277765	0.385886
Ccnb1	0.669174	0.424502	0.50453	0.492997	0.865632	0.977515	0.224308	0.197855
Ccnb1ip1	0.0484854	0	0	0.0216203	0	0.162901	0.0267004	0.0412151
Ccnb2	0.63537	0.421378	0.679681	0.952984	0.930868	1.00914	0.381699	0.490998
Ccnc	6.33217	7.07755	6.09677	6.62526	6.8464	5.40423	5.66557	7.23609
Ccnd1	18.794	19.9737	16.7784	3.68983	6.25324	11.3948	6.4295	17.4597
Ccnd2	1.86263	1.95342	1.28594	1.6339	0.832778	1.9287	1.31158	1.97267
Ccnd3	5.02932	4.87247	4.87786	5.35271	6.49945	7.17345	4.38954	5.64647
Ccndbp1	5.12775	4.90374	4.5475	5.43896	7.07146	8.07379	6.95088	5.46791
Ccne1	0.223827	0.452179	0.110897	0.199615	0.166485	0.421127	0.197215	0.114159
Ccne2	0.670395	0.592324	0.61837	0.597875	0.954854	0.421723	0.534131	0.751744
Ccnf	0.76891	0.672831	0.564988	1.49932	2.0195	0.91075	1.49277	0.952725
Ccng1	9.32921	11.213	8.16082	8.01901	10.0087	8.89068	7.83634	8.99763
Ccng2	5.83369	5.46922	4.93263	7.35222	6.95044	5.53963	6.82906	4.15719
Ccnh	4.19127	5.01533	5.42054	5.96412	5.15765	4.92863	5.22714	5.18702
Ccni	18.0723	17.5619	18.0002	20.0385	19.2577	17.6183	19.673	15.2525
Ccnj	1.37893	1.24318	1.008	0.957602	0.79867	1.32152	0.896294	1.36432
Ccnjl	0.144402	0.145862	0.0715453	0.296198	0.196914	0.174658	0.111329	0.270049
Ccnk	4.67743	4.69201	3.84123	4.53817	2.67624	3.68414	3.66085	4.92274
Ccnl1	8.80234	9.81061	10.5749	8.50432	14.2464	13.9107	14.0034	9.28377
Ccnl2	31.015	33.2213	34.3429	25.9206	25.1268	32.0193	32.7272	26.5919
Ccno	0	0.0603218	0	0.0479324	0.044419	0	0.0591951	0
Ccnt1	2.42758	2.57861	2.76529	1.87503	1.6122	1.66036	2.1485	3.5744
Ccnt2	3.61266	3.39458	3.50984	3.07882	3.31394	3.51046	3.52465	3.29819
Ccny	12.0988	12.514	10.652	12.3239	12.4254	13.3107	11.1372	12.6541
Ccp110	0.409845	0.509984	0.364186	0.214539	0.397626	0.299346	0.314013	0.378684
Ccpg1	7.09581	7.13018	5.85873	5.92801	6.09773	6.78414	5.85843	7.36796
Ccr1	0.0233511	0.157248	0.0867715	0.0624754	0.0578961	0.0941459	0.128592	0.0396994
Ccr10	0.0495709	0.0556355	0.0307004	0.0442086	0	0.0666191	0	0.0842757
Ccr1l1	0	0	0	0	0	0.0541786	0	0
Ccr3	0	0.0370478	0	0	0.0409212	0	0	0
Ccr4	0	0.0894894	0.098763	0	0	0.107157	0.0439089	0
Ccr5	1.37927	1.41084	0.994778	1.1055	0.995611	1.05586	1.46141	1.0092
Ccr6	0.0584648	0.0656174	0	0.0782106	0.0724779	0	0.0965877	0
Ccr7	0.17768	0.0398835	0	0.15846	0	0.0477574	0	0
Ccr9	0.117692	0.0943506	0.166605	0.0899666	0.0833721	0.112978	0.0370353	0.114337
Ccrl2	0.239989	0.244863	0.35131	0.2724	0.297511	0.469128	0.384464	0.148366
Ccrn4l	0.281333	0.575781	0.696943	0.206623	0.205155	0.200164	0.10936	0.647104
Ccs	20.9738	20.2584	21.3606	23.0127	20.8532	25.7384	24.78	18.0089
Ccsap	0.242336	0	0.350197	0.180101	0.0500701	0.21712	0.177936	0.274665
Cct2	20.0461	18.4264	19.8303	20.0213	21.0557	20.7233	19.9305	20.5871
Cct3	25.1266	27.4244	25.5266	31.9476	29.0915	34.4186	25.3635	25.9442
Cct4	27.6042	31.831	32.0374	34.2719	35.3366	37.4827	33.4451	30.1618
Cct5	27.8076	30.2343	28.4161	41.4063	30.1635	47.0141	35.6308	29.674
Cct6a	9.87508	11.9132	10.6691	10.7273	9.923	10.6696	9.29506	12.499
Cct6b	0.0973535	0	0.150733	0.238761	0.0603437	0.0327087	0.107223	0.124133
Cct7	11.8275	12.9431	12.6709	15.7059	12.703	14.1679	14.0594	12.2242
Cct8	18.1596	20.4329	18.8033	22.8962	21.4388	23.9399	21.704	19.6417
Cct8l1	0.0223133	0.0500863	0	0.0397992	0.0553229	0.0899617	0.0245754	0.037935
Ccz1	7.50192	7.69699	7.83658	8.52811	8.6015	8.37277	9.02485	7.77285
Cd101	0.0276594	0.0465648	0.0685204	0.0246673	0.0857221	0.0743437	0.0304634	0.0235119
Cd14	10.4713	11.6236	10.5184	8.00816	12.5899	14.3425	11.912	12.0958
Cd151	19.6423	19.2712	18.4347	24.2712	22.0032	27.7051	21.5757	17.4793
Cd163	8.71091	14.183	8.11763	8.89014	8.2892	8.93119	9.26744	10.377
Cd163l1	0.0393585	0.0294491	0.0325008	0.0468012	0	0.070526	0.028899	0.0223045
Cd164	244.4	221.149	224.45	261.576	197.941	176.916	223.766	256.277
Cd177	0	0.0178682	0.0197198	0	0.0197363	0.0213957	0	0.0270664
Cd180	0.555268	0.717624	0.166735	0.600245	0.29203	0.474876	0.463302	0.743768
Cd19	0.107761	0.0403149	0.111232	0.0640694	0.0445299	0.0482739	0.0197809	0.122137
Cd1d1	16.6823	16.1352	14.4848	18.9696	16.3637	15.2415	18.3735	14.0008
Cd2	0.259651	0.249786	0.275671	0.297724	0.229918	0.0996998	0.326827	0.126124
Cd200	0.231819	0.0650449	0.119642	0.258427	0.359228	0.675014	0.489363	0.065686
Cd200r1	1.57962	1.08342	1.46744	0.978295	0.870324	0.648656	1.69143	1.19356
Cd209a	0.264885	0.264259	0.364554	0.104992	0.145944	0.197768	0.129662	0.100074
Cd209b	0.792886	1.65843	1.20531	1.1571	1.29568	2.22802	0.992349	0.857811
Cd209d	0	0	0	0	0	0	0	0.0802231
Cd209e	0	0.0675851	0	0	0	0	0	0
Cd22	1.34378	2.17703	0.940787	1.46936	0.941575	1.39763	1.46714	1.74819
Cd226	0.224098	0.0628787	0.0925262	0.0499641	0.0463018	0.10039	0.10284	0.190495
Cd24	0.32727	0.157418	0.115821	0.250172	0.144897	1.22522	0.102985	0.119227
Cd244	0.383221	0.322579	0.276894	0.256325	0.237537	0.0858362	0.211036	0.162879
Cd247	0.252894	0.563275	0.196309	0.376914	0.196474	0.425986	0.290923	0.224537
Cd248	0.201994	0.151138	0.271049	0.315251	0.125204	0.407195	0.241011	0.200323
Cd27	0.164272	0.276554	0.237388	0.268588	0.237587	0.220768	0.180926	0.27928
Cd274	2.37395	1.72075	1.34772	1.45554	2.32984	1.26286	2.28779	2.85881
Cd276	0.911072	0.671037	0.89927	0.901386	0.900023	1.12875	0.925041	0.677651
Cd28	0.0676214	0.0758943	0	0.0603065	0	0	0.0744767	0.114963
Cd2ap	5.18555	5.32673	4.54513	3.93875	3.81348	5.46294	5.56604	6.05164
Cd2bp2	8.06606	7.86126	7.52521	6.94365	5.9594	7.70896	6.49636	8.34822
Cd300a	2.792	4.81227	3.41713	3.73496	2.67831	3.26085	4.53935	2.20382
Cd300e	0.0598009	0.335585	0	0.053332	0.0741342	0.160735	0.131727	0.203336
Cd300le-ps1	3.18949	5.89987	2.70693	6.05767	6.07738	5.3977	5.46441	4.61914
Cd300lf	2.63896	3.48287	3.05687	6.73359	3.1806	3.80924	3.8484	3.19871
Cd302	149.404	144.294	164.683	169.902	189.637	167.218	176.498	151.358
Cd320	5.92323	5.64443	6.32164	8.17291	10.1139	9.7126	8.45211	6.71341
Cd34	0.297511	0.166954	0.552766	0.397992	0.276614	0.799659	0.40959	0.569024
Cd36	2.6659	3.84689	2.43387	2.83019	3.3431	2.63695	3.05218	3.16129
Cd37	1.19313	1.50648	0.738931	1.52959	1.38666	1.50325	1.56047	1.141
Cd38	3.67008	5.84435	3.28449	4.02707	3.50163	3.09881	3.894	4.60613
Cd3d	0.260098	0.0729796	0.161085	0.289952	0.16122	0.0873875	0	0.110548
Cd3e	0.0420412	0.235923	0.104148	0.262454	0.104235	0.169499	0.0926063	0
Cd3eap	0.815015	0.898247	0.447839	0.577528	0.776267	0.909538	0.270494	0.947818
Cd3g	0.139054	0.156066	0.172239	0.248024	0.0861915	0.373754	0.306302	0
Cd4	5.87533	6.87119	5.77916	5.65807	4.40685	6.20396	5.70967	6.50523
Cd40	0.382399	0.273115	0.172239	0.434042	0.344766	0.140158	0.229726	0.295508
Cd40lg	0.0551421	0	0	0	0.0683587	0	0.182197	0
Cd44	0.486706	0.570528	0.388508	0.385829	0.415649	0.988406	0.667081	0.294205
Cd46	0.796878	0.731756	0.98705	0.581462	0.718455	0.535468	0.199469	1.29319
Cd47	12.017	11.3814	9.71109	12.2111	11.0483	10.2362	11.6608	12.9872
Cd48	3.67393	5.14573	4.17461	4.65751	4.78035	4.40698	4.84897	4.74907
Cd5	0.0840414	0.0235808	0.0260244	0.0936878	0	0.0564723	0.069421	0.0357198
Cd52	0.404272	0.72597	0.4006	0.576864	0.400936	0.543308	0.979564	0.412383
Cd53	2.82957	3.7712	2.94156	2.43336	2.88139	2.30879	3.42251	2.9207
Cd55	0.0705495	0.0263935	0.0582572	0.0629178	0.029153	0.37925	0.207204	0.0399805
Cd59	26.1847	24.5646	28.3441	30.434	27.6622	30.9825	33.6353	25.1616
Cd5l	48.2959	72.2562	44.7709	46.3636	44.5632	44.7075	50.7478	55.1745
Cd6	0.132896	0.132581	0.0365801	0.158026	0.0915268	0.0595335	0.113842	0.050208
Cd63	16.7418	15.0197	14.8025	21.3156	26.4211	33.6754	35.4831	15.1677
Cd68	15.5794	19.1815	14.6625	18.1298	13.6488	16.5856	17.5551	16.6994
Cd69	0.107672	0.120844	0.0666835	0.0480121	0.100109	0.144701	0.0889402	0.13729
Cd7	1.10822	1.79107	1.26288	1.38367	1.09907	1.96595	1.22057	1.13045
Cd70	0	0	0.0653791	0.0941459	0	0	0	0
Cd72	0.123565	0.312509	0.207756	0.0858512	0.163548	0.262816	0.489946	0.154769
Cd74	101.056	146.586	91.5975	87.5596	85.3903	118.949	115.736	111.726
Cd79b	0	0.160061	0	0.286169	0.176796	0.0479152	0.235607	0.242458
Cd80	0.173748	0.097502	0.053803	0.0387381	0	0	0	0.147694
Cd81	221.787	220.984	216.4	210.353	212.652	227.976	215.093	206.825
Cd82	20.9577	20.3446	18.4455	23.9308	19.6995	20.0771	20.3576	18.9274
Cd83	0.570522	0.8004	0.681436	0.581492	0.53045	0.547667	0.561035	0.346409
Cd84	0.565319	0.555171	0.350115	0.441145	0.175204	0.474839	0.700459	1.20138
Cd86	0.641686	1.02884	0.681276	0.817531	0.454564	0.492784	0.858182	0.779237
Cd8a	0.746026	0.767521	0.693047	0.914822	0.963371	0.751947	0.616242	0.792701
Cd8b	0.10321	0	0.0852273	0.214773	0.127948	0.0462353	0.0378911	0.116979
Cd9	1.54605	1.01572	1.2144	1.37881	1.49589	4.66229	1.86891	1.34628
Cd93	1.93558	3.13561	2.22787	2.38574	1.34689	2.26997	1.75975	2.91816
Cd96	0.0840005	0.141416	0.0520235	0.168556	0.208268	0.11289	0.0925163	0.0714048
Cd97	3.14946	4.00072	3.63509	3.5748	2.83952	3.07826	3.42145	4.01581
Cd99	22.4891	21.5191	22.0527	36.3201	32.2579	44.076	27.2301	18.9944
Cd99l2	4.0656	3.98098	4.00812	4.12528	3.15004	2.84342	3.46113	3.96732
Cda	0.137213	0.0513331	0.113305	0.0815798	0	0.24587	0.35262	0.233276
Cdadc1	7.35781	6.78208	7.71758	7.03657	7.56879	7.44777	7.34508	7.02636
Cdc123	8.23782	8.84013	8.59262	10.1178	8.46544	10.8281	9.70964	8.7225
Cdc14a	0.259563	0.433052	0.26286	0.266684	0.239164	0.246311	0.259803	0.324506
Cdc14b	1.48072	1.45997	1.337	1.78953	1.52683	1.11587	1.49366	1.99979
Cdc16	6.14471	5.38428	5.66409	5.95336	5.51699	6.0906	5.50854	6.87188
Cdc20	0.705813	0.628267	0.633079	0.716284	1.02584	1.07939	0.348474	0.827555
Cdc23	2.60558	2.33357	2.23309	3.09829	2.23496	2.36982	2.15954	2.46097
Cdc25a	1.54066	1.82835	1.6737	1.1938	1.00193	1.5444	0.792788	1.95372
Cdc25b	1.64274	1.00883	0.556685	1.16098	0.73006	0.958063	3.61856	1.02755
Cdc25c	0.208783	0.28119	0.232747	0.186198	0.232942	0.168352	0.206954	0.177476
Cdc26	4.18464	3.56977	4.29834	4.8847	5.01298	4.85489	5.87201	4.74596
Cdc27	3.73022	3.4808	3.1865	2.44723	3.34863	2.68902	2.70744	5.22406
Cdc34	20.7082	25.5842	20.4796	25.1473	21.41	26.8401	20.5539	24.9783
Cdc37	25.8842	26.7837	24.2879	31.8519	26.3785	32.5057	27.381	26.2387
Cdc37l1	13.0333	15.2298	12.0912	13.178	15.0934	19.4979	15.1226	13.9969
Cdc40	3.64322	3.26178	3.18642	3.63355	3.84414	3.62541	4.0585	3.54609
Cdc42	54.2614	56.4042	49.0956	57.8624	54.622	53.7062	53.1962	58.6758
Cdc42bpa	1.67695	1.47496	1.36498	1.18423	1.30673	1.32461	1.22879	1.90841
Cdc42bpb	6.4971	5.77122	5.53011	5.77011	3.98938	5.32634	5.02172	5.68989
Cdc42bpg	2.07669	2.34699	1.85527	2.34893	1.7133	2.44081	2.19955	2.07898
Cdc42ep1	5.15566	5.09291	5.3815	5.70008	3.85398	6.90283	5.38059	4.76011
Cdc42ep2	1.54765	2.12693	1.44752	1.49291	1.1355	1.48565	1.53061	1.9868
Cdc42ep3	0.702975	1.22164	0.955002	0.728049	0.871466	0.883788	0.824192	1.27224
Cdc42ep4	7.47311	8.13062	8.19865	17.1786	12.3461	13.0562	10.3304	8.06383
Cdc42ep5	0.657924	1.01532	0.916802	0.660098	1.12147	1.87891	1.08693	0.699087
Cdc42se1	8.96875	9.7026	8.94344	7.66649	7.50593	9.83405	6.11579	10.4037
Cdc42se2	1.25771	1.7271	1.42956	1.46475	1.15561	1.90899	0.912607	1.63512
Cdc45	0.256032	0.130616	0.144151	0.228336	0.173126	0.187683	0.205082	0.276997
Cdc5l	6.71055	7.65134	6.38512	6.82793	6.84423	7.09175	6.90372	5.93767
Cdc6	0.0323176	0.054407	0.020015	0.0288216	0.120191	0.0651481	0.0711877	0.109886
Cdc7	0.0592064	0.0332249	0.128338	0.0792027	0.0917465	0.0596763	0.0489064	0.0251643
Cdc73	3.17196	3.11502	3.07595	2.5869	2.4059	2.60819	2.39031	3.54781
Cdca2	0.165744	0.225883	0.17597	0.168931	0.293528	0.222746	0.182546	0.0805091
Cdca3	0.519501	0.226744	0.57198	0.540521	0.82291	0.543017	0.222509	0.147201
Cdca4	1.62039	1.42728	1.72762	1.39023	1.42394	1.92958	1.42321	1.84818
Cdca5	0.160805	0.0902393	0.0995906	0.0717052	0.0996739	0.0540273	0.0442769	0.0683465
Cdca7	0.222176	0.207798	0.206398	0.115583	0.160667	0.248822	0.183525	0.220338
Cdca7l	0.0504592	0.0943874	0.0208337	0.0450008	0.0625534	0.0452086	0.0926244	0
Cdca8	0.408374	0.291668	0.413862	0.662179	0.414208	0.598713	0.327108	0.126232
Cdcp1	0.024757	0.0463097	0.0306652	0.0367982	0.0306909	0.166357	0.0181779	0.0561194
Cdh1	11.9236	11.1446	9.07557	15.7229	9.86241	10.8764	13.4028	10.6533
Cdh10	0.0136246	0.0458742	0.016876	0.0243015	0.0337803	0.0183103	0.0300116	0.0463264
Cdh11	0.14189	0.0843082	0.0516916	0.0818795	0.10347	0.25799	0.330934	0.156088
Cdh13	0.102192	0.0430105	0.0949352	0.0797455	0.142522	0.0858362	0.154759	0.108586
Cdh15	0	0	0	0.0141461	0.0589914	0.0639514	0.01747	0.026967
Cdh16	0	0.0506888	0.0186472	0.013426	0.0373256	0	0	0.0511884
Cdh17	35.5942	22.7731	25.9483	16.267	29.1398	28.4428	33.5007	37.4875
Cdh19	0.0557113	0	0.0460044	0	0.0460429	0.0249571	0	0
Cdh2	33.0545	32.5433	30.6672	34.1073	29.2166	35.4606	35.4109	31.4469
Cdh20	0.017623	0.0395579	0.0436573	0.0471498	0.0655407	0	0.0194095	0
Cdh22	0.0248211	0	0	0.0221361	0.0307703	0.0166787	0.0136687	0
Cdh23	0.041007	0.0322167	0.0304759	0.0585137	0.0406686	0.033066	0.0316149	0.0418297
Cdh26	0.038533	0	0.119322	0	0.0238844	0.0258926	0.0636591	0
Cdh3	0.14987	0.137623	0.0675041	0.109357	0.118231	0.146482	0.120046	0.138979
Cdh5	3.13776	5.18977	3.432	3.51837	2.16101	3.00853	2.68789	4.36744
Cdh6	0.0121146	0.0135967	0.045017	0.0324122	0.0150182	0.0488428	0.0266854	0.10298
Cdh7	0	0	0	0	0	0.0491531	0	0.0310903
Cdh8	0.0276505	0	0.0171246	0.0369891	0.0171389	0.03716	0	0
Cdh9	0.0296235	0.0498715	0.0733861	0	0.0183619	0	0.0163133	0
Cdhr1	0.0100997	0.0113353	0.10008	0.0720574	0.0375613	0.0407195	0.111236	0.103023
Cdhr5	0.176164	0.197716	0.119021	0.142825	0.0595603	0.0645682	0.0705539	0.190589
Cdip1	12.8525	14.4436	12.2714	18.7603	12.987	14.4838	15.5746	14.0265
Cdipt	10.2668	11.1587	11.1381	11.7811	10.343	12.3962	9.92928	10.6383
Cdk1	1.1276	0.816487	0.675823	0.810988	1.30769	0.537724	0.520803	0.37104
Cdk10	7.98867	7.6773	6.50072	8.82663	5.67252	8.13087	6.77975	6.98034
Cdk11b	7.7143	8.35294	8.18724	8.4558	6.7617	8.97439	6.43776	8.1175
Cdk12	3.26861	3.05227	2.78171	2.17111	2.13723	2.40347	2.44981	3.91036
Cdk13	2.9254	3.15885	2.34084	2.27142	2.68047	2.8822	2.72349	3.81488
Cdk14	0.59365	0.528792	0.536902	0.680699	0.607441	0.519213	0.633076	0.576724
Cdk16	10.8301	11.1146	10.27	11.3582	10.602	9.82123	10.7633	10.7839
Cdk17	0.964702	1.25437	0.816046	1.07019	1.67721	1.21742	1.11433	1.32007
Cdk18	6.2469	4.63062	5.43439	8.18829	5.22282	6.09148	7.32821	6.22404
Cdk19	1.62958	1.66954	1.30552	1.60663	1.28808	1.31602	1.39136	1.60127
Cdk2	3.26676	3.26885	2.55944	3.15908	2.75675	3.83485	2.92603	3.64679
Cdk20	2.31955	2.649	2.59588	3.06666	2.62328	2.21491	2.68916	2.24848
Cdk2ap1	12.5872	12.7855	12.6732	11.9154	11.8993	14.7426	14.0569	13.3299
Cdk2ap2	37.3211	36.1702	36.6755	59.7751	45.6762	49.6446	57.3576	38.523
Cdk4	14.7756	15.1307	14.3831	15.8383	14.4843	18.7942	16.3922	17.6634
Cdk5	4.60349	5.45835	4.64445	5.39676	4.78641	5.78756	5.15195	4.2919
Cdk5r1	0.181109	0.0813062	0.134598	0.0646069	0.0898069	0.0486789	0.0398938	0.369484
Cdk5r2	0	0	0.0364058	0	0	0	0	0
Cdk5rap1	2.61943	2.14264	1.97973	2.77162	2.06394	2.56564	2.71384	1.6983
Cdk5rap2	0.542185	0.548522	0.4824	0.735517	0.568004	0.6876	0.580329	0.53229
Cdk5rap3	12.7237	13.3878	10.4005	14.8516	11.772	15.3393	14.503	12.6449
Cdk6	1.0061	0.967879	0.747725	0.640907	0.997801	1.46802	0.886481	1.41726
Cdk9	13.3524	13.713	11.4304	12.6666	11.9193	14.3764	12.2929	12.7964
Cdkl1	0.117518	0.105517	0.145564	0.104806	0.0582743	0.0947609	0.0517728	0
Cdkl2	0.307816	0.115158	0.101673	0.0549035	0.178077	0.0551571	0.0904056	0.313991
Cdkl3	0.149658	0.223956	0.123582	0.311427	0.21645	0.402255	0.219773	0.508868
Cdkn1a	11.9315	16.231	20.6157	22.0269	13.2661	16.8148	7.5932	20.9162
Cdkn1b	5.97825	6.29546	6.49075	7.02098	6.98416	6.77788	6.71979	5.10274
Cdkn1c	0.571107	0.282156	0.452939	0.652414	0.651645	0.586062	0.528601	0.505116
Cdkn2a	0.0618571	0.0694248	0	0.165497	0.0766832	0	0.272512	0
Cdkn2aip	4.78673	4.68468	4.34007	4.40553	5.07952	4.68319	5.35634	5.24083
Cdkn2aipnl	4.79736	4.78602	4.95186	5.51007	4.17506	5.82858	4.85674	4.32516
Cdkn2b	0.114577	0.192891	0.118267	0.102182	0.0946924	0.256635	0.147224	0.129861
Cdkn2c	0.391963	0.812153	0.224079	0.242005	0.336399	0.486245	0.365284	0.512599
Cdkn3	0.268509	0.180815	0.26607	0.383141	0.39944	0.505195	0.059146	0.0912987
Cdnf	0.138385	0	0.0857054	0	0	0	0.0762073	0.117635
Cdo1	486.022	510.194	607.992	525.02	665.516	717.809	586.796	498.362
Cdon	1.59597	1.49445	1.15803	1.13698	1.07705	1.05339	1.21692	1.87845
Cdr2	0.257439	0.268297	0.204992	0.426383	0.273551	0.444827	0.74935	0.562723
Cds1	1.3749	1.41866	1.34593	0.96907	0.797238	1.60933	0.68387	1.99816
Cds2	7.88907	6.45687	7.4082	7.44206	8.04992	6.31542	7.71644	6.58507
Cdt1	0.385675	0.216429	0.238857	0.257966	0.310774	0.233241	0.148671	0.22949
Cdv3	4.87245	4.51055	4.53744	3.96475	3.08628	5.20985	3.79957	5.01857
Cdx2	0.0842875	0.141899	0.182704	0.0375849	0.10449	0.198232	0.0928323	0.0716488
Cdx4	0.0267345	0.0300053	0	0.0238425	0	0.035929	0	0.0454515
Cdyl	0.771358	0.976717	0.734954	0.740833	0.809126	0.930318	0.784206	1.04239
Cdyl2	0.178006	0.332972	0.146991	0.0881944	0.220671	0.0265805	0.217835	0
Ceacam1	33.7848	35.5075	35.8654	29.0012	32.3544	34.3264	33.8267	34.3344
Ceacam10	8.54597	9.80622	10.4274	7.56463	6.48307	7.62814	10.7469	10.8426
Ceacam11	0.0457376	0	0	0	0	0.122935	0	0.0777586
Ceacam16	0.0267345	0.0300053	0.0993439	0.0238425	0.198854	0.035929	0.176669	0.0454515
Ceacam19	0.0426854	0	0	0.0380679	0.0264582	0.0286828	0.0235064	0.108854
Ceacam20	0.473096	0.698652	0.801894	0.688395	0.277811	0.468485	0.822722	1.05831
Ceacam3	0.028641	0.0160725	0.035476	0.0766282	0	0.0384911	0.0315445	0.0486926
Ceacam9	0.0440574	0	0	0	0.0546172	0.0592095	0	0
Cebpa	54.7397	49.6447	39.5422	76.0688	38.6119	46.7461	51.8328	51.3671
Cebpb	20.6526	21.3451	28.2802	19.5802	23.7823	25.4	18.2597	22.8306
[truncated: 14,552 more rows]

## Sheet: diffExp_res_signif_Partek
Gene Symbol	p-value(Attribute)	p-value(T_Group vs. C_Group)	MeanRatio(T_Group vs. C_Group)	FoldChange(T_Group vs. C_Group)	FoldChange(T_Group vs. C_Group) (Description)	F(Attribute)	SS(Attribute)	SS(Error)	F(Error)
Sult2a6	2.23251e-07	2.23251e-07	0.412369	-2.42501	T_Group down vs C_Group	665.929	1926.57	17.3584	1
Abcd3	4.28373e-07	4.28373e-07	1.86171	1.86171	T_Group up vs C_Group	534.878	5027.24	56.3931	1
Plin2	4.60252e-07	4.60252e-07	5.22209	5.22209	T_Group up vs C_Group	522.108	125949	1447.39	1
Rpl7	7.74897e-07	7.74897e-07	0.696173	-1.43643	T_Group down vs C_Group	438.042	3407.18	46.6693	1
Fau	1.27614e-06	1.27614e-06	0.619212	-1.61496	T_Group down vs C_Group	370.132	2430.58	39.4007	1
Acot2	1.60327e-06	1.60327e-06	3.90573	3.90573	T_Group up vs C_Group	342.637	1254.06	21.9602	1
Acot3	1.79089e-06	1.79089e-06	6.68279	6.68279	T_Group up vs C_Group	330.038	735.189	13.3656	1
Acot4	1.87986e-06	1.87986e-06	5.04315	5.04315	T_Group up vs C_Group	324.663	1228.39	22.7016	1
Rpl13a	2.01216e-06	2.01216e-06	0.646462	-1.54688	T_Group down vs C_Group	317.268	1848.05	34.9494	1
Cyp4a1	2.07942e-06	2.07942e-06	4.74888	4.74888	T_Group up vs C_Group	313.753	225351	4309.47	1
Slc25a34	2.35331e-06	2.35331e-06	6.22494	6.22494	T_Group up vs C_Group	300.864	12.8061	0.255388	1
Fam107b	2.4154e-06	2.4154e-06	0.640637	-1.56095	T_Group down vs C_Group	298.218	42.3178	0.851415	1
Acox1	2.74567e-06	2.74567e-06	2.43439	2.43439	T_Group up vs C_Group	285.527	25907.3	544.411	1
Serpina10	3.23623e-06	3.23623e-06	0.662318	-1.50985	T_Group down vs C_Group	270.023	5348.99	118.856	1
Pdk4	3.45073e-06	3.45073e-06	5.6794	5.6794	T_Group up vs C_Group	264.197	78205.5	1776.07	1
RGD1560220	4.06099e-06	4.06099e-06	0.674026	-1.48362	T_Group down vs C_Group	249.962	6.4593	0.155047	1
Acot12	4.44462e-06	4.44462e-06	1.55806	1.55806	T_Group up vs C_Group	242.398	691.422	17.1146	1
Pex11a	4.58334e-06	4.58334e-06	6.4497	6.4497	T_Group up vs C_Group	239.874	4381.62	109.598	1
Crat	7.39908e-06	7.39908e-06	3.95093	3.95093	T_Group up vs C_Group	203.707	1813.21	53.4063	1
Spp2	7.87078e-06	7.87078e-06	0.634447	-1.57617	T_Group down vs C_Group	199.447	293461	8828.23	1
Gpd2	7.89536e-06	7.89536e-06	3.09144	3.09144	T_Group up vs C_Group	199.235	38.56	1.16124	1
Ehhadh	8.47766e-06	8.47766e-06	5.37457	5.37457	T_Group up vs C_Group	194.442	130574	4029.2	1
Tle3	8.89888e-06	8.89888e-06	3.22061	3.22061	T_Group up vs C_Group	191.24	18.7858	0.589388	1
Ssr4	9.92651e-06	9.92651e-06	0.807332	-1.23865	T_Group down vs C_Group	184.212	364.477	11.8715	1
Srrm1	1.09143e-05	1.09143e-05	1.53663	1.53663	T_Group up vs C_Group	178.315	28.8255	0.969931	1
Ugt2b15	1.16066e-05	1.16066e-05	0.62346	-1.60395	T_Group down vs C_Group	174.59	13483.9	463.39	1
Abr	1.16848e-05	1.16848e-05	1.68952	1.68952	T_Group up vs C_Group	174.188	0.517912	0.0178397	1
Slc22a5	1.23874e-05	1.23874e-05	2.46816	2.46816	T_Group up vs C_Group	170.73	180.688	6.34996	1
Gins2	1.47802e-05	1.47802e-05	2.46632	2.46632	T_Group up vs C_Group	160.67	1.85953	0.0694415	1
Scd1	1.49709e-05	1.49709e-05	11.7993	11.7993	T_Group up vs C_Group	159.963	263317	9876.67	1
Rpsa	1.5369e-05	1.5369e-05	0.602302	-1.6603	T_Group down vs C_Group	158.524	9461.84	358.122	1
Mrpl35	1.63899e-05	1.63899e-05	0.734215	-1.362	T_Group down vs C_Group	155.051	10.511	0.406743	1
Tomm7	1.68841e-05	1.68841e-05	0.591744	-1.68992	T_Group down vs C_Group	153.472	3216.49	125.749	1
Neu2	1.91272e-05	1.91272e-05	0.497112	-2.01162	T_Group down vs C_Group	147.008	0.404011	0.0164893	1
Rps21	1.97752e-05	1.97752e-05	0.649881	-1.53874	T_Group down vs C_Group	145.327	4522.63	186.722	1
Gtf3c3	2.00299e-05	2.00299e-05	1.80897	1.80897	T_Group up vs C_Group	144.686	4.76666	0.197669	1
Fam222b	2.03903e-05	2.03903e-05	1.61276	1.61276	T_Group up vs C_Group	143.797	17.3493	0.723906	1
Phtf1	2.06715e-05	2.06715e-05	1.31921	1.31921	T_Group up vs C_Group	143.119	5.29892	0.222148	1
Rps9	2.08492e-05	2.08492e-05	0.709244	-1.40995	T_Group down vs C_Group	142.696	1968.66	82.7772	1
Optn	2.31794e-05	2.31794e-05	1.49145	1.49145	T_Group up vs C_Group	137.563	165.964	7.23874	1
Ppargc1a	2.36694e-05	2.36694e-05	0.443629	-2.25414	T_Group down vs C_Group	136.571	2.6009	0.114266	1
Dctpp1	2.61974e-05	2.61974e-05	0.386037	-2.59042	T_Group down vs C_Group	131.855	12.5692	0.571958	1
Cpt2	2.6921e-05	2.6921e-05	2.36974	2.36974	T_Group up vs C_Group	130.615	5671.49	260.528	1
Rbp4	2.74236e-05	2.74236e-05	0.770734	-1.29746	T_Group down vs C_Group	129.78	1879450	86890.5	1
Slc25a42	2.80218e-05	2.80218e-05	2.37707	2.37707	T_Group up vs C_Group	128.813	467.252	21.7643	1
Mrps33	3.15899e-05	3.15899e-05	0.679762	-1.4711	T_Group down vs C_Group	123.563	136.988	6.65186	1
Agfg2	3.28971e-05	3.28971e-05	0.687178	-1.45523	T_Group down vs C_Group	121.834	26.8645	1.323	1
Ak3	3.52951e-05	3.52951e-05	0.726557	-1.37635	T_Group down vs C_Group	118.889	298.674	15.0733	1
Fitm2	3.60182e-05	3.60182e-05	2.17773	2.17773	T_Group up vs C_Group	118.053	278.676	14.1636	1
Rps3a	3.63837e-05	3.63837e-05	0.693975	-1.44097	T_Group down vs C_Group	117.639	1758.59	89.6945	1
Eef1a1	3.84817e-05	3.84817e-05	0.795719	-1.25673	T_Group down vs C_Group	115.364	3191.44	165.984	1
B3galt1	3.85274e-05	3.85274e-05	0.489866	-2.04137	T_Group down vs C_Group	115.316	74.9391	3.89914	1
Pold4	4.07792e-05	4.07792e-05	0.620276	-1.61219	T_Group down vs C_Group	113.055	381.946	20.2704	1
Prr16	4.26132e-05	4.26132e-05	0.47885	-2.08834	T_Group down vs C_Group	111.334	22.6773	1.22213	1
Ubr4	4.26948e-05	4.26948e-05	1.46152	1.46152	T_Group up vs C_Group	111.259	9.37418	0.505531	1
C9	4.5347e-05	4.5347e-05	0.811532	-1.23224	T_Group down vs C_Group	108.943	16045.1	883.679	1
Map3k13	4.64551e-05	4.64551e-05	1.80813	1.80813	T_Group up vs C_Group	108.028	10.8358	0.601836	1
Sod1	4.67962e-05	4.67962e-05	0.806448	-1.24001	T_Group down vs C_Group	107.752	21095.8	1174.69	1
Psmb1	4.90649e-05	4.90649e-05	0.729147	-1.37147	T_Group down vs C_Group	105.983	1602.15	90.7021	1
G0s2	5.17411e-05	5.17411e-05	5.19652	5.19652	T_Group up vs C_Group	104.032	184297	10629.3	1
Etv1	5.20103e-05	5.20103e-05	0.671291	-1.48967	T_Group down vs C_Group	103.843	0.0120297	0.000695071	1
Dap	5.37173e-05	5.37173e-05	0.659619	-1.51603	T_Group down vs C_Group	102.675	1576.61	92.132	1
Hacl1	5.38585e-05	5.38585e-05	2.97438	2.97438	T_Group up vs C_Group	102.581	30243	1768.93	1
Slc30a10	5.57236e-05	5.57236e-05	1.48079	1.48079	T_Group up vs C_Group	101.365	47.9956	2.84097	1
Nudt7	5.89559e-05	5.89559e-05	2.33246	2.33246	T_Group up vs C_Group	99.38	29.1748	1.76141	1
Rhob	5.92343e-05	5.92343e-05	1.89379	1.89379	T_Group up vs C_Group	99.2158	34.1276	2.06384	1
Tuft1	5.94461e-05	5.94461e-05	2.49935	2.49935	T_Group up vs C_Group	99.0917	0.213784	0.0129446	1
Btbd1	6.20337e-05	6.20337e-05	1.2208	1.2208	T_Group up vs C_Group	97.6207	7.57435	0.465538	1
Habp2	6.63806e-05	6.63806e-05	0.724324	-1.3806	T_Group down vs C_Group	95.325	810.115	50.9907	1
Rpl5	6.83245e-05	6.83245e-05	0.660646	-1.51367	T_Group down vs C_Group	94.3623	999.9	63.5784	1
Rps13	6.96107e-05	6.96107e-05	0.783351	-1.27657	T_Group down vs C_Group	93.7452	390.648	25.0027	1
Chchd1	7.37784e-05	7.37784e-05	0.750141	-1.33308	T_Group down vs C_Group	91.8456	94.5104	6.17409	1
Nceh1	7.49442e-05	7.49442e-05	5.30282	5.30282	T_Group up vs C_Group	91.3396	293.914	19.3069	1
Cox7b	7.85631e-05	7.85631e-05	0.800674	-1.24895	T_Group down vs C_Group	89.8337	7800.35	520.986	1
Sult2a2	7.91781e-05	7.91781e-05	0.39852	-2.50928	T_Group down vs C_Group	89.587	31.5103	2.11037	1
Chuk	7.93937e-05	7.93937e-05	1.47691	1.47691	T_Group up vs C_Group	89.5011	50.0213	3.35334	1
Atp5e	8.06962e-05	8.06962e-05	0.668875	-1.49505	T_Group down vs C_Group	88.9887	5726.02	386.073	1
Etnk1	8.07757e-05	8.07757e-05	1.24429	1.24429	T_Group up vs C_Group	88.9578	4.00175	0.269909	1
Use1	8.32954e-05	8.32954e-05	0.665261	-1.50317	T_Group down vs C_Group	87.9985	133.208	9.08251	1
Zfand6	8.37099e-05	8.37099e-05	0.731796	-1.3665	T_Group down vs C_Group	87.8444	270.53	18.4779	1
Fcho2	8.45416e-05	8.45416e-05	1.5218	1.5218	T_Group up vs C_Group	87.5382	5.22877	0.358388	1
Bsg	8.494e-05	8.494e-05	0.790416	-1.26516	T_Group down vs C_Group	87.393	6728	461.914	1
F10	8.81475e-05	8.81475e-05	0.756257	-1.3223	T_Group down vs C_Group	86.2558	6425.36	446.952	1
Rplp1	8.87428e-05	8.87428e-05	0.660599	-1.51378	T_Group down vs C_Group	86.0508	25627.1	1786.88	1
Mef2d	9.27335e-05	9.27335e-05	1.75156	1.75156	T_Group up vs C_Group	84.7224	18.8959	1.3382	1
Tor3a	9.42278e-05	9.42278e-05	11.5752	11.5752	T_Group up vs C_Group	84.2445	506.915	36.1031	1
Cnksr3	9.46447e-05	9.46447e-05	1.37516	1.37516	T_Group up vs C_Group	84.1129	0.477621	0.03407	1
Hps4	9.48661e-05	9.48661e-05	0.579365	-1.72603	T_Group down vs C_Group	84.0434	74.734	5.33539	1
Myo1e	9.62704e-05	9.62704e-05	1.57092	1.57092	T_Group up vs C_Group	83.6072	15.9092	1.14171	1
Pxdc1	9.64105e-05	9.64105e-05	0.70519	-1.41806	T_Group down vs C_Group	83.5642	52.5272	3.77151	1
Ier2	9.77776e-05	9.77776e-05	0.48503	-2.06173	T_Group down vs C_Group	83.1485	260.498	18.7976	1
Eef1b2	9.80854e-05	9.80854e-05	0.723325	-1.38251	T_Group down vs C_Group	83.056	1303.6	94.1723	1
Oxsr1	0.000100126	0.000100126	1.3943	1.3943	T_Group up vs C_Group	82.4522	3.08563	0.22454	1
Txndc15	0.000101572	0.000101572	0.717653	-1.39343	T_Group down vs C_Group	82.0343	58.7964	4.30038	1
Acaa1b	0.000101638	0.000101638	3.79297	3.79297	T_Group up vs C_Group	82.0152	32829.4	2401.7	1
Mtmr12	0.000102355	0.000102355	1.79998	1.79998	T_Group up vs C_Group	81.8112	1.94059	0.142322	1
Rpl22	0.000103507	0.000103507	0.663058	-1.50816	T_Group down vs C_Group	81.4871	502.381	36.991	1
Igfbp2	0.000103855	0.000103855	0.139601	-7.16329	T_Group down vs C_Group	81.3903	310.819	22.9132	1
Crot	0.000105144	0.000105144	1.94888	1.94888	T_Group up vs C_Group	81.0347	5317.8	393.743	1
Dmgdh	0.000109696	0.000109696	1.33992	1.33992	T_Group up vs C_Group	79.8248	607.058	45.6293	1
2002-03-01	0.000111221	0.000111221	0.698209	-1.43224	T_Group down vs C_Group	79.4345	746.125	56.3578	1
Rgn	0.000113262	0.000113262	0.766114	-1.30529	T_Group down vs C_Group	78.923	10379.8	789.111	1
Pdpk1	0.000118635	0.000118635	1.41459	1.41459	T_Group up vs C_Group	77.6333	3.51871	0.271949	1
Nipsnap3b	0.000120259	0.000120259	0.796687	-1.2552	T_Group down vs C_Group	77.2585	132.669	10.3032	1
Onecut1	0.000120951	0.000120951	0.3995	-2.50313	T_Group down vs C_Group	77.101	136.686	10.6369	1
Lrp1	0.000121046	0.000121046	1.5167	1.5167	T_Group up vs C_Group	77.0794	670.5	52.1929	1
Angptl4	0.00012243	0.00012243	2.43209	2.43209	T_Group up vs C_Group	76.7682	18863.8	1474.35	1
RGD735065	0.000122995	0.000122995	0.698039	-1.43258	T_Group down vs C_Group	76.6426	1123.37	87.9435	1
Rnf39	0.000123227	0.000123227	0.529883	-1.88721	T_Group down vs C_Group	76.591	21.9123	1.71657	1
Rpl11	0.00012483	0.00012483	0.616653	-1.62166	T_Group down vs C_Group	76.2394	2354.52	185.299	1
Stk24	0.000125045	0.000125045	2.12623	2.12623	T_Group up vs C_Group	76.1928	30.2628	2.38313	1
Sost	0.000127409	0.000127409	2.44999	2.44999	T_Group up vs C_Group	75.686	0.165103	0.0130885	1
Rps7	0.00012854	0.00012854	0.657855	-1.52009	T_Group down vs C_Group	75.4481	703.079	55.9123	1
Rassf3	0.000130253	0.000130253	1.51966	1.51966	T_Group up vs C_Group	75.093	272.794	21.7965	1
Rps25	0.000132109	0.000132109	0.643308	-1.55447	T_Group down vs C_Group	74.7153	1671.2	134.205	1
Slc16a1	0.000135868	0.000135868	2.09196	2.09196	T_Group up vs C_Group	73.9712	1067.74	86.6075	1
Rpl10	0.00013597	0.00013597	0.711127	-1.40622	T_Group down vs C_Group	73.9514	3764.64	305.442	1
Sned1	0.000137965	0.000137965	1.86204	1.86204	T_Group up vs C_Group	73.568	0.96873	0.0790069	1
Osbpl9	0.000138808	0.000138808	0.66044	-1.51414	T_Group down vs C_Group	73.4082	123.621	10.1041	1
Apoa5	0.000138919	0.000138919	0.720499	-1.38793	T_Group down vs C_Group	73.3872	45163.4	3692.48	1
Zfp36	0.000139483	0.000139483	0.491731	-2.03363	T_Group down vs C_Group	73.2812	538.929	44.1256	1
Foxo4	0.000139867	0.000139867	0.82379	-1.2139	T_Group down vs C_Group	73.2092	0.831484	0.0681458	1
Acsm2a	0.000142836	0.000142836	0.282562	-3.53904	T_Group down vs C_Group	72.6622	98.7126	8.15108	1
Sat2	0.000144194	0.000144194	0.453069	-2.20717	T_Group down vs C_Group	72.4169	44.2563	3.66679	1
Abhd15	0.00014425	0.00014425	2.23439	2.23439	T_Group up vs C_Group	72.4069	26.589	2.2033	1
Pls3	0.000148171	0.000148171	0.714886	-1.39882	T_Group down vs C_Group	71.7161	87.9436	7.35764	1
Tbl1xr1	0.00015063	0.00015063	1.63606	1.63606	T_Group up vs C_Group	71.2952	39.9276	3.36019	1
Uap1l1	0.000151249	0.000151249	0.583359	-1.71421	T_Group down vs C_Group	71.1908	1.45826	0.122903	1
Flot1	0.000151295	0.000151295	0.715055	-1.39849	T_Group down vs C_Group	71.1831	16.4814	1.38921	1
Akr1c14	0.000152438	0.000152438	0.630814	-1.58525	T_Group down vs C_Group	70.9916	37667.3	3183.53	1
Uhrf1bp1l	0.000152725	0.000152725	1.28861	1.28861	T_Group up vs C_Group	70.9438	4.26085	0.360357	1
Rps14	0.000155177	0.000155177	0.428423	-2.33414	T_Group down vs C_Group	70.5405	842.556	71.6657	1
Uxt	0.000155373	0.000155373	0.789337	-1.26689	T_Group down vs C_Group	70.5087	34.0514	2.89764	1
Krt23	0.000155918	0.000155918	4.17385	4.17385	T_Group up vs C_Group	70.4204	3.41752	0.291181	1
2015-09-01	0.000156701	0.000156701	0.755993	-1.32276	T_Group down vs C_Group	70.2942	664.178	56.6913	1
Hnrnpu	0.000159577	0.000159577	1.1976	1.1976	T_Group up vs C_Group	69.8379	34.7567	2.98606	1
Sh3bp5	0.000161871	0.000161871	0.497628	-2.00953	T_Group down vs C_Group	69.4817	94.696	8.17734	1
Rpl19	0.000162886	0.000162886	0.610718	-1.63742	T_Group down vs C_Group	69.3263	4457.87	385.816	1
Psmb7	0.000163332	0.000163332	0.734842	-1.36084	T_Group down vs C_Group	69.2584	712.555	61.7301	1
Cyp4a2	0.000164132	0.000164132	1.78764	1.78764	T_Group up vs C_Group	69.1372	695441	60353.1	1
Omp	0.000166593	0.000166593	?	?	No change between T_Group and C_Group	68.7693	0.039606	0.00345555	1
Lbp	0.0001675	0.0001675	0.510424	-1.95915	T_Group down vs C_Group	68.6356	2502.39	218.754	1
Olr271	0.00016865	0.00016865	?	?	No change between T_Group and C_Group	68.4673	0.00668382	0.000585724	1
LOC100362172	0.000168934	0.000168934	4.20695	4.20695	T_Group up vs C_Group	68.426	1.48753	0.130436	1
C4bpb	0.00016899	0.00016899	0.715198	-1.39821	T_Group down vs C_Group	68.4179	12890.2	1130.43	1
Cyp4a3	0.000169338	0.000169338	2.18063	2.18063	T_Group up vs C_Group	68.3674	3552760	311794	1
Acot1	0.000172571	0.000172571	8.30266	8.30266	T_Group up vs C_Group	67.9051	12.472	1.102	1
Bcl9l	0.000172716	0.000172716	1.94738	1.94738	T_Group up vs C_Group	67.8846	30.6747	2.71119	1
Il4ra	0.000175881	0.000175881	1.71357	1.71357	T_Group up vs C_Group	67.4436	411.661	36.6227	1
Il1rap	0.000176582	0.000176582	0.710947	-1.40657	T_Group down vs C_Group	67.3472	50.1279	4.46592	1
Golga4	0.000176889	0.000176889	1.16477	1.16477	T_Group up vs C_Group	67.3053	3.37973	0.30129	1
Clta	0.000176896	0.000176896	0.758377	-1.31861	T_Group down vs C_Group	67.3043	356.462	31.7777	1
Atp6v1g1	0.000178275	0.000178275	0.737276	-1.35634	T_Group down vs C_Group	67.1169	581.412	51.976	1
Rps5	0.000181356	0.000181356	0.673607	-1.48455	T_Group down vs C_Group	66.705	1729.28	155.546	1
Trappc3	0.000186243	0.000186243	0.881023	-1.13504	T_Group down vs C_Group	66.0704	5.29014	0.480409	1
Thrb	0.000191477	0.000191477	0.69191	-1.44527	T_Group down vs C_Group	65.4151	7.29898	0.669477	1
Cyp27a1	0.000192388	0.000192388	0.629997	-1.58731	T_Group down vs C_Group	65.3034	5563.16	511.137	1
Eci2	0.000193001	0.000193001	1.35513	1.35513	T_Group up vs C_Group	65.2287	1318.56	121.287	1
Srsf1	0.000195063	0.000195063	1.32546	1.32546	T_Group up vs C_Group	64.9796	24.7655	2.28677	1
Eif3h	0.000195331	0.000195331	0.692022	-1.44504	T_Group down vs C_Group	64.9475	449.139	41.4925	1
Apoc4	0.000196513	0.000196513	0.629581	-1.58836	T_Group down vs C_Group	64.8065	49849.9	4615.27	1
Pfdn5	0.00020039	0.00020039	0.736007	-1.35868	T_Group down vs C_Group	64.3521	157.907	14.7228	1
Apol9a	0.000204091	0.000204091	2.44134	2.44134	T_Group up vs C_Group	63.9291	480.179	45.0666	1
Trappc8	0.000204221	0.000204221	1.24447	1.24447	T_Group up vs C_Group	63.9144	1.75047	0.164326	1
Pemt	0.000208724	0.000208724	0.690409	-1.44842	T_Group down vs C_Group	63.4138	21896.9	2071.81	1
Nbn	0.000210162	0.000210162	1.8203	1.8203	T_Group up vs C_Group	63.2569	57.1099	5.41695	1
Msantd4	0.000212371	0.000212371	0.886675	-1.12781	T_Group down vs C_Group	63.0188	0.951472	0.0905894	1
LOC498368	0.000214958	0.000214958	0.607704	-1.64554	T_Group down vs C_Group	62.744	76.2648	7.29295	1
Dapk2	0.0002179	0.0002179	0.53557	-1.86717	T_Group down vs C_Group	62.4368	11.7948	1.13345	1
Plin5	0.000220126	0.000220126	2.09764	2.09764	T_Group up vs C_Group	62.208	10.9985	1.06081	1
Laptm4a	0.000220704	0.000220704	0.845202	-1.18315	T_Group down vs C_Group	62.1491	475.539	45.9095	1
Blk	0.000220761	0.000220761	1.6479	1.6479	T_Group up vs C_Group	62.1433	0.17622	0.0170142	1
Bfar	0.00022273	0.00022273	1.42805	1.42805	T_Group up vs C_Group	61.9443	18.46	1.78806	1
Swi5	0.000225371	0.000225371	0.843589	-1.18541	T_Group down vs C_Group	61.681	60.345	5.87004	1
Shfm1	0.000227621	0.000227621	0.620728	-1.61101	T_Group down vs C_Group	61.4599	1030.98	100.649	1
Spry2	0.000227741	0.000227741	0.522392	-1.91427	T_Group down vs C_Group	61.4482	0.519687	0.0507439	1
Chd8	0.000228253	0.000228253	1.23068	1.23068	T_Group up vs C_Group	61.3984	0.664851	0.0649709	1
Cpt1b	0.000228568	0.000228568	4.51772	4.51772	T_Group up vs C_Group	61.3677	2.17851	0.212996	1
Paqr7	0.00022978	0.00022978	5.17391	5.17391	T_Group up vs C_Group	61.2505	4430	433.956	1
Rps23	0.000235915	0.000235915	0.704783	-1.41888	T_Group down vs C_Group	60.6694	634.804	62.78	1
Cyb5a	0.000236711	0.000236711	0.652513	-1.53254	T_Group down vs C_Group	60.5954	36706.2	3634.55	1
RGD1563438	0.000238724	0.000238724	0.698951	-1.43072	T_Group down vs C_Group	60.41	137.356	13.6424	1
Lysmd2	0.000244004	0.000244004	0.777333	-1.28645	T_Group down vs C_Group	59.9333	0.504292	0.0504853	1
Cyb561d2	0.000244028	0.000244028	0.702147	-1.4242	T_Group down vs C_Group	59.9312	1.98684	0.198912	1
Rpl41	0.00025221	0.00025221	0.628652	-1.59071	T_Group down vs C_Group	59.2191	7224.63	731.99	1
Acbd4	0.000255055	0.000255055	0.8084	-1.23701	T_Group down vs C_Group	58.9787	2.77698	0.282506	1
Bloc1s1	0.000257613	0.000257613	0.623777	-1.60314	T_Group down vs C_Group	58.7656	643.657	65.7177	1
Scd	0.000258631	0.000258631	4.95651	4.95651	T_Group up vs C_Group	58.6815	37.5883	3.84328	1
Icam1	0.000266767	0.000266767	1.87829	1.87829	T_Group up vs C_Group	58.0254	131.907	13.6395	1
Uqcrh	0.000268194	0.000268194	0.710895	-1.40668	T_Group down vs C_Group	57.9131	1494.35	154.82	1
Tbx3	0.000269607	0.000269607	2.87903	2.87903	T_Group up vs C_Group	57.8027	20.2823	2.10533	1
Cyp2c13	0.00027227	0.00027227	0.670393	-1.49166	T_Group down vs C_Group	57.5966	158371	16498	1
Rpl34	0.000273324	0.000273324	0.625561	-1.59856	T_Group down vs C_Group	57.5158	5951.64	620.871	1
Bag3	0.000273457	0.000273457	1.51437	1.51437	T_Group up vs C_Group	57.5056	79.4235	8.28686	1
Prrg4	0.000273875	0.000273875	8.03304	8.03304	T_Group up vs C_Group	57.4737	24.8824	2.59761	1
Bhmt	0.000274369	0.000274369	1.95071	1.95071	T_Group up vs C_Group	57.436	1340240	140007	1
Armc8	0.000275646	0.000275646	1.3823	1.3823	T_Group up vs C_Group	57.3392	0.886011	0.0927126	1
Arid1a	0.000276016	0.000276016	1.34819	1.34819	T_Group up vs C_Group	57.3112	6.74449	0.706091	1
Rps16	0.000276877	0.000276877	0.724027	-1.38116	T_Group down vs C_Group	57.2464	631.796	66.2186	1
Keg1	0.000279549	0.000279549	0.729003	-1.37174	T_Group down vs C_Group	57.0468	199.011	20.9314	1
Idh3a	0.000286168	0.000286168	1.3473	1.3473	T_Group up vs C_Group	56.5631	4.83412	0.512785	1
Inhbe	0.000286248	0.000286248	3.29097	3.29097	T_Group up vs C_Group	56.5574	6102.91	647.438	1
Rprm	0.000287107	0.000287107	1.8976	1.8976	T_Group up vs C_Group	56.4957	0.81976	0.0870607	1
Ndufb2	0.000291238	0.000291238	0.709363	-1.40972	T_Group down vs C_Group	56.2027	1149.55	122.722	1
Nr2c1	0.000291258	0.000291258	1.55122	1.55122	T_Group up vs C_Group	56.2013	3.90175	0.416547	1
Myd88	0.000292858	0.000292858	1.58114	1.58114	T_Group up vs C_Group	56.0892	61.4222	6.57048	1
Trim36	0.000297836	0.000297836	0.539513	-1.85352	T_Group down vs C_Group	55.7459	6.7664	0.728275	1
Rreb1	0.000300374	0.000300374	2.24381	2.24381	T_Group up vs C_Group	55.5738	42.2708	4.56374	1
Prkar2a	0.000304795	0.000304795	1.88395	1.88395	T_Group up vs C_Group	55.2785	119.335	12.9528	1
Nup214	0.000306007	0.000306007	1.38975	1.38975	T_Group up vs C_Group	55.1986	0.632002	0.0686977	1
Slc25a46	0.000308596	0.000308596	1.18709	1.18709	T_Group up vs C_Group	55.0292	2.17581	0.237235	1
Dynlrb1	0.000310461	0.000310461	0.70298	-1.42252	T_Group down vs C_Group	54.9084	349.15	38.1526	1
Colq	0.000310764	0.000310764	5.42343	5.42343	T_Group up vs C_Group	54.8888	19.7338	2.15714	1
Cers2	0.000314526	0.000314526	1.50007	1.50007	T_Group up vs C_Group	54.6484	2403.12	263.845	1
Echs1	0.000317113	0.000317113	0.832412	-1.20133	T_Group down vs C_Group	54.4851	2248.32	247.588	1
Inpp1	0.000328093	0.000328093	1.66263	1.66263	T_Group up vs C_Group	53.8119	2.06212	0.229925	1
Ephx2	0.000332292	0.000332292	1.67228	1.67228	T_Group up vs C_Group	53.5623	275.093	30.8157	1
Arrdc4	0.00033549	0.00033549	3.06882	3.06882	T_Group up vs C_Group	53.375	1.76434	0.198334	1
Mrpl52	0.000337689	0.000337689	0.75468	-1.32507	T_Group down vs C_Group	53.2476	139.93	15.7674	1
Ppm1k	0.000339771	0.000339771	2.28331	2.28331	T_Group up vs C_Group	53.1279	379.326	42.8391	1
Elof1	0.000340472	0.000340472	0.763698	-1.30942	T_Group down vs C_Group	53.0879	38.5428	4.35611	1
Lect2	0.000342361	0.000342361	0.507915	-1.96883	T_Group down vs C_Group	52.9805	9033.95	1023.09	1
Hfe2	0.00034315	0.00034315	1.60323	1.60323	T_Group up vs C_Group	52.9359	1017.09	115.281	1
Pbld1	0.000345563	0.000345563	0.675965	-1.47937	T_Group down vs C_Group	52.8003	189.909	21.5804	1
Rps27a	0.000349123	0.000349123	0.636522	-1.57104	T_Group down vs C_Group	52.6025	740.956	84.5156	1
Eci1	0.000354044	0.000354044	1.69993	1.69993	T_Group up vs C_Group	52.3335	7178.86	823.051	1
LOC296884	0.0003622	0.0003622	1.88675	1.88675	T_Group up vs C_Group	51.8984	5.78784	0.669135	1
Anapc11	0.000362471	0.000362471	0.647395	-1.54465	T_Group down vs C_Group	51.8842	7.60702	0.879692	1
Tspan4	0.000366977	0.000366977	0.74098	-1.34956	T_Group down vs C_Group	51.6496	215.163	24.995	1
Dclre1c	0.000369894	0.000369894	1.29747	1.29747	T_Group up vs C_Group	51.4998	0.158663	0.0184851	1
Epb41l4a	0.000370724	0.000370724	4.70925	4.70925	T_Group up vs C_Group	51.4575	0.109402	0.0127564	1
Caprin1	0.000378077	0.000378077	1.4535	1.4535	T_Group up vs C_Group	51.0878	255.831	30.0461	1
Rpl15	0.000379042	0.000379042	0.692782	-1.44346	T_Group down vs C_Group	51.04	159.201	18.7149	1
Mrfap1	0.000384797	0.000384797	0.830028	-1.20478	T_Group down vs C_Group	50.7583	85.3775	10.0922	1
Dact2	0.000385455	0.000385455	2.2341	2.2341	T_Group up vs C_Group	50.7265	13.7934	1.6315	1
Vat1	0.000385848	0.000385848	0.76038	-1.31513	T_Group down vs C_Group	50.7075	144.622	17.1125	1
Slc13a4	0.000392354	0.000392354	2.03243	2.03243	T_Group up vs C_Group	50.3968	114.18	13.5937	1
Rpl30	0.000395256	0.000395256	0.652463	-1.53265	T_Group down vs C_Group	50.2604	887.049	105.894	1
Hnrpd	0.000396376	0.000396376	1.29447	1.29447	T_Group up vs C_Group	50.2081	16.5905	1.98261	1
Rpl32	0.000396531	0.000396531	0.643262	-1.55458	T_Group down vs C_Group	50.2009	953.854	114.004	1
Mogat2	0.000400815	0.000400815	0.312757	-3.19737	T_Group down vs C_Group	50.0029	0.0254029	0.00304818	1
Psma4	0.000402444	0.000402444	0.792055	-1.26254	T_Group down vs C_Group	49.9283	249.373	29.9677	1
Lipa	0.000412737	0.000412737	0.837277	-1.19435	T_Group down vs C_Group	49.4663	401.701	48.7242	1
Rtn4rl1	0.000414392	0.000414392	2.25796	2.25796	T_Group up vs C_Group	49.3934	20.8961	2.53833	1
Pkdcc	0.000423821	0.000423821	0.403129	-2.4806	T_Group down vs C_Group	48.9856	1631.75	199.864	1
Acsl1	0.000424102	0.000424102	1.63581	1.63581	T_Group up vs C_Group	48.9736	85816.1	10513.7	1
Gata3	0.000425028	0.000425028	0.0861386	-11.6092	T_Group down vs C_Group	48.9343	0.0225786	0.00276844	1
Atrn	0.000426685	0.000426685	1.50956	1.50956	T_Group up vs C_Group	48.8641	383.78	47.1242	1
Slc46a1	0.000428283	0.000428283	1.68972	1.68972	T_Group up vs C_Group	48.7968	150.658	18.5248	1
RGD1308134	0.00043396	0.00043396	0.767161	-1.30351	T_Group down vs C_Group	48.5604	8.26729	1.02149	1
Pm20d2	0.000434292	0.000434292	3.00145	3.00145	T_Group up vs C_Group	48.5467	4.82075	0.595809	1
Ppargc1b	0.000435644	0.000435644	2.36247	2.36247	T_Group up vs C_Group	48.491	1.73508	0.214688	1
Nsa2	0.000438637	0.000438637	0.718275	-1.39222	T_Group down vs C_Group	48.3687	15.6253	1.93828	1
Fam20b	0.000441537	0.000441537	1.44092	1.44092	T_Group up vs C_Group	48.2512	7.29741	0.907429	1
Iah1	0.000441916	0.000441916	0.772142	-1.2951	T_Group down vs C_Group	48.2359	184.249	22.9185	1
Cyp1a1	0.000449509	0.000449509	0.550514	-1.81648	T_Group down vs C_Group	47.9334	2.33351	0.292094	1
Nedd8	0.000460425	0.000460425	0.812073	-1.23142	T_Group down vs C_Group	47.5102	130.042	16.4228	1
Tmem98	0.000463645	0.000463645	0.568093	-1.76027	T_Group down vs C_Group	47.3879	187.805	23.7789	1
Epha4	0.000464892	0.000464892	1.97911	1.97911	T_Group up vs C_Group	47.3409	0.0302683	0.00383622	1
Aass	0.000466903	0.000466903	1.92911	1.92911	T_Group up vs C_Group	47.2654	3006.04	381.596	1
Eif4ebp1	0.000468208	0.000468208	0.658831	-1.51784	T_Group down vs C_Group	47.2166	91.621	11.6426	1
Cyp1a2	0.000469075	0.000469075	0.520313	-1.92192	T_Group down vs C_Group	47.1843	33741	4290.54	1
Fam213b	0.000470854	0.000470854	0.719681	-1.3895	T_Group down vs C_Group	47.1182	23.4566	2.98695	1
Prox1	0.000474689	0.000474689	2.23419	2.23419	T_Group up vs C_Group	46.977	254.003	32.4418	1
Ddx17	0.000475847	0.000475847	1.3636	1.3636	T_Group up vs C_Group	46.9347	227.857	29.1286	1
LOC685322	0.000488815	0.000488815	0.798921	-1.25169	T_Group down vs C_Group	46.4696	2073.28	267.695	1
Prdx6	0.000497249	0.000497249	0.729808	-1.37022	T_Group down vs C_Group	46.1759	1288.6	167.438	1
Scand1	0.000497454	0.000497454	0.650465	-1.53736	T_Group down vs C_Group	46.1689	189.458	24.6215	1
Vcl	0.000501288	0.000501288	1.41613	1.41613	T_Group up vs C_Group	46.0376	5.61785	0.732164	1
Ctif	0.000502092	0.000502092	1.76187	1.76187	T_Group up vs C_Group	46.0103	27.7147	3.61416	1
Apoa1	0.000506582	0.000506582	0.595713	-1.67866	T_Group down vs C_Group	45.8586	1056060	138172	1
Mrpl20	0.000507552	0.000507552	0.726774	-1.37594	T_Group down vs C_Group	45.826	114.133	14.9434	1
Mrps18c	0.000514444	0.000514444	0.765725	-1.30595	T_Group down vs C_Group	45.5972	21.813	2.87031	1
Galk1	0.000515447	0.000515447	0.569117	-1.75711	T_Group down vs C_Group	45.5643	916.02	120.623	1
Naca	0.000515496	0.000515496	0.796048	-1.25621	T_Group down vs C_Group	45.5626	1403.84	184.868	1
Snrnp35	0.000516287	0.000516287	0.808031	-1.23758	T_Group down vs C_Group	45.5367	1.746	0.230056	1
Ubp1	0.000521383	0.000521383	1.277	1.277	T_Group up vs C_Group	45.3709	5.68513	0.75182	1
Rps17	0.000522584	0.000522584	0.657018	-1.52203	T_Group down vs C_Group	45.3322	865.785	114.592	1
Rasd1	0.000524415	0.000524415	2.3811	2.3811	T_Group up vs C_Group	45.2733	26.7371	3.54343	1
Bcap31	0.000525056	0.000525056	0.779498	-1.28288	T_Group down vs C_Group	45.2528	394.666	52.3282	1
Mycl1	0.000529695	0.000529695	3.87963	3.87963	T_Group up vs C_Group	45.1051	2.8865	0.38397	1
Gemin6	0.000530749	0.000530749	0.722832	-1.38345	T_Group down vs C_Group	45.0718	12.5806	1.67474	1
Nlrp12	0.000532033	0.000532033	0.652892	-1.53165	T_Group down vs C_Group	45.0313	48.0948	6.40817	1
Ndufa6	0.000538384	0.000538384	0.663169	-1.50791	T_Group down vs C_Group	44.8331	4124.95	552.041	1
Ptprs	0.000539214	0.000539214	1.5255	1.5255	T_Group up vs C_Group	44.8074	59.4175	7.95638	1
Tyw1	0.000555026	0.000555026	0.736588	-1.35761	T_Group down vs C_Group	44.3282	5.04807	0.683277	1
Fdxr	0.000556958	0.000556958	0.717386	-1.39395	T_Group down vs C_Group	44.2708	7.57695	1.0269	1
Gsto1	0.000557466	0.000557466	0.742678	-1.34648	T_Group down vs C_Group	44.2558	654.459	88.7286	1
Erlec1	0.000560662	0.000560662	0.88043	-1.13581	T_Group down vs C_Group	44.1617	12.5244	1.70162	1
Pim1	0.000577015	0.000577015	0.49333	-2.02704	T_Group down vs C_Group	43.6911	5.91047	0.811672	1
RGD1560010	0.000578711	0.000578711	3.22676	3.22676	T_Group up vs C_Group	43.6433	3.53443	0.485907	1
Mycbp2	0.000583846	0.000583846	1.29782	1.29782	T_Group up vs C_Group	43.4997	0.645006	0.0889668	1
RGD1311251	0.000592852	0.000592852	0.762522	-1.31144	T_Group down vs C_Group	43.252	2.47858	0.343834	1
Utrn	0.0005964	0.0005964	1.45924	1.45924	T_Group up vs C_Group	43.1558	1.35012	0.187709	1
Tpmt	0.00060166	0.00060166	0.667544	-1.49803	T_Group down vs C_Group	43.0145	92.7771	12.9413	1
Clpx	0.000607235	0.000607235	1.59879	1.59879	T_Group up vs C_Group	42.8665	2114.12	295.912	1
Proser1	0.000607727	0.000607727	1.61892	1.61892	T_Group up vs C_Group	42.8536	1.06243	0.148752	1
Nsf	0.000612753	0.000612753	1.46463	1.46463	T_Group up vs C_Group	42.7219	1.85926	0.26112	1
Tex264	0.000616738	0.000616738	0.741559	-1.34851	T_Group down vs C_Group	42.6185	151.975	21.3957	1
Nme2	0.000619707	0.000619707	0.652867	-1.53171	T_Group down vs C_Group	42.542	1070.92	151.04	1
Secp43	0.000622719	0.000622719	0.782323	-1.27824	T_Group down vs C_Group	42.465	16.5963	2.34494	1
Mrpl23	0.000628467	0.000628467	0.790929	-1.26434	T_Group down vs C_Group	42.3193	66.1497	9.37867	1
Zdhhc17	0.000631652	0.000631652	1.41596	1.41596	T_Group up vs C_Group	42.2393	0.821606	0.116707	1
Rpl27a	0.000632041	0.000632041	0.63998	-1.56255	T_Group down vs C_Group	42.2296	105.647	15.0103	1
Tsc22d3	0.000637558	0.000637558	0.594382	-1.68242	T_Group down vs C_Group	42.0924	198.754	28.331	1
Urod	0.000641819	0.000641819	0.761483	-1.31323	T_Group down vs C_Group	41.9876	76.3138	10.9052	1
Hexb	0.000649524	0.000649524	0.720984	-1.38699	T_Group down vs C_Group	41.8004	7.70815	1.10642	1
Gpcpd1	0.000655131	0.000655131	1.73384	1.73384	T_Group up vs C_Group	41.666	15.5001	2.23204	1
Tmem185a	0.000656511	0.000656511	0.841557	-1.18827	T_Group down vs C_Group	41.6331	2.1229	0.305944	1
Vps13d	0.000660898	0.000660898	1.30364	1.30364	T_Group up vs C_Group	41.5293	1.80767	0.261165	1
Drd1a	0.000666622	0.000666622	?	?	No change between T_Group and C_Group	41.3952	0.00248354	0.000359975	1
RGD1303142	0.00066749	0.00066749	0.65629	-1.52372	T_Group down vs C_Group	41.375	12.5198	1.81556	1
Agmat	0.000669028	0.000669028	0.624673	-1.60084	T_Group down vs C_Group	41.3393	765.625	111.123	1
Kynu	0.000671268	0.000671268	1.42183	1.42183	T_Group up vs C_Group	41.2876	4045.46	587.895	1
Ccnd1	0.000672383	0.000672383	2.62919	2.62919	T_Group up vs C_Group	41.2619	255.814	37.1986	1
Ndufs8	0.000687096	0.000687096	0.801145	-1.24821	T_Group down vs C_Group	40.928	392.3	57.5107	1
Ss18	0.000690516	0.000690516	1.55229	1.55229	T_Group up vs C_Group	40.8517	20.9906	3.08294	1
Eef1d	0.00069243	0.00069243	0.729477	-1.37084	T_Group down vs C_Group	40.8093	26.8637	3.94965	1
Wbp1l	0.000695108	0.000695108	0.832996	-1.20049	T_Group down vs C_Group	40.7502	248.664	36.613	1
Ogt	0.000697814	0.000697814	1.30168	1.30168	T_Group up vs C_Group	40.6907	6.98069	1.02933	1
RGD1563348	0.000697829	0.000697829	0.704243	-1.41997	T_Group down vs C_Group	40.6904	165.239	24.3653	1
Taf10	0.000698192	0.000698192	0.737197	-1.35649	T_Group down vs C_Group	40.6825	205.375	30.2894	1
Grb14	0.000704018	0.000704018	0.721147	-1.38668	T_Group down vs C_Group	40.5556	135.541	20.0526	1
Zbtb7c	0.000705651	0.000705651	3.72687	3.72687	T_Group up vs C_Group	40.5203	0.0430874	0.00638012	1
Nolc1	0.000706463	0.000706463	1.66543	1.66543	T_Group up vs C_Group	40.5028	10.6685	1.58042	1
Pskh1	0.000713103	0.000713103	0.76902	-1.30036	T_Group down vs C_Group	40.3606	2.30773	0.343067	1
Slc16a6	0.000716468	0.000716468	3.10368	3.10368	T_Group up vs C_Group	40.2892	4.87576	0.726114	1
Mospd2	0.000721675	0.000721675	1.32381	1.32381	T_Group up vs C_Group	40.1796	6.33095	0.945398	1
Lppr5	0.000724646	0.000724646	0.0886123	-11.2851	T_Group down vs C_Group	40.1175	0.00312625	0.000467564	1
Fam46c	0.000726125	0.000726125	0.714357	-1.39986	T_Group down vs C_Group	40.0867	5.81847	0.870882	1
Fkbp2	0.000740628	0.000740628	0.748779	-1.33551	T_Group down vs C_Group	39.7893	559.969	84.4401	1
Ahr	0.000744043	0.000744043	0.467718	-2.13804	T_Group down vs C_Group	39.7204	55.6483	8.406	1
Ngef	0.000744178	0.000744178	0.566195	-1.76618	T_Group down vs C_Group	39.7177	23.9477	3.61768	1
Acot7	0.000751326	0.000751326	1.41737	1.41737	T_Group up vs C_Group	39.5749	54.7777	8.30491	1
Eef2k	0.00075418	0.00075418	0.486555	-2.05527	T_Group down vs C_Group	39.5184	9.03821	1.37225	1
Psma7	0.000759533	0.000759533	0.753409	-1.3273	T_Group down vs C_Group	39.4132	463.103	70.4997	1
Med31	0.000760205	0.000760205	0.677736	-1.4755	T_Group down vs C_Group	39.4	14.4485	2.20028	1
Bbc3	0.000760451	0.000760451	0.476738	-2.09759	T_Group down vs C_Group	39.3952	22.8867	3.48571	1
Cyp2c6v1	0.00076341	0.00076341	0.582879	-1.71562	T_Group down vs C_Group	39.3376	184298	28110.2	1
Rpl26	0.000765221	0.000765221	0.606453	-1.64893	T_Group down vs C_Group	39.3024	93.0531	14.2057	1
LOC501038	0.000767224	0.000767224	2.4557	2.4557	T_Group up vs C_Group	39.2637	119.378	18.2425	1
Psmb3	0.000768885	0.000768885	0.754012	-1.32624	T_Group down vs C_Group	39.2317	175.501	26.8408	1
Nipa2	0.000770825	0.000770825	1.41159	1.41159	T_Group up vs C_Group	39.1944	4.35788	0.667119	1
Acsm5	0.000775374	0.000775374	0.430787	-2.32133	T_Group down vs C_Group	39.1074	866.371	132.922	1
Slc23a2	0.000776789	0.000776789	1.50659	1.50659	T_Group up vs C_Group	39.0805	0.729751	0.112038	1
LOC690911	0.00079262	0.00079262	1.53714	1.53714	T_Group up vs C_Group	38.7839	1.71933	0.265987	1
Dhrs7b	0.000801556	0.000801556	0.697911	-1.43285	T_Group down vs C_Group	38.62	13.6625	2.1226	1
Psmb4	0.000812453	0.000812453	0.726205	-1.37702	T_Group down vs C_Group	38.4233	1397.82	218.277	1
Acsl3	0.000820353	0.000820353	1.75707	1.75707	T_Group up vs C_Group	38.2829	5.20424	0.81565	1
LOC686032	0.000827415	0.000827415	0.76923	-1.3	T_Group down vs C_Group	38.1589	582.056	91.5208	1
Rasal2	0.00082846	0.00082846	2.08627	2.08627	T_Group up vs C_Group	38.1407	0.37116	0.0583879	1
Fam165b	0.00083929	0.00083929	0.612131	-1.63364	T_Group down vs C_Group	37.9536	10.5693	1.67088	1
Hsbp1	0.000841416	0.000841416	0.823014	-1.21505	T_Group down vs C_Group	37.9173	216.926	34.3262	1
Lrpprc	0.000843386	0.000843386	0.829567	-1.20545	T_Group down vs C_Group	37.8837	29.899	4.73539	1
Ostc	0.00084521	0.00084521	0.804058	-1.24369	T_Group down vs C_Group	37.8527	99.5505	15.7797	1
Col4a3bp	0.00084546	0.00084546	1.48247	1.48247	T_Group up vs C_Group	37.8485	14.7021	2.33068	1
Zwint	0.000848523	0.000848523	0.719395	-1.39006	T_Group down vs C_Group	37.7966	19.6305	3.11623	1
Eml5	0.000848937	0.000848937	2.00518	2.00518	T_Group up vs C_Group	37.7897	0.863765	0.137143	1
Ndufb7	0.000854392	0.000854392	0.742484	-1.34683	T_Group down vs C_Group	37.698	816.55	129.962	1
Prdx4	0.000854643	0.000854643	0.759747	-1.31623	T_Group down vs C_Group	37.6938	1132.35	180.245	1
Ncor2	0.000862145	0.000862145	1.61145	1.61145	T_Group up vs C_Group	37.5692	8.98742	1.43534	1
Hmox2	0.000868805	0.000868805	0.796146	-1.25605	T_Group down vs C_Group	37.4597	23.542	3.77078	1
Npdc1	0.000870346	0.000870346	0.623236	-1.60453	T_Group down vs C_Group	37.4345	3.28024	0.525757	1
RGD1565192	0.000873589	0.000873589	0.703583	-1.4213	T_Group down vs C_Group	37.3817	77.3488	12.415	1
Dph3	0.000877626	0.000877626	0.77359	-1.29267	T_Group down vs C_Group	37.3164	1.30627	0.210031	1
Lpcat3	0.000880623	0.000880623	1.86145	1.86145	T_Group up vs C_Group	37.2681	939.159	151.2	1
Yipf1	0.000882316	0.000882316	0.822548	-1.21573	T_Group down vs C_Group	37.241	52.7413	8.4973	1
Mk1	0.000884	0.000884	1.73283	1.73283	T_Group up vs C_Group	37.214	566.247	91.2958	1
Tpp1	0.000884097	0.000884097	0.826877	-1.20937	T_Group down vs C_Group	37.2124	47.4585	7.65204	1
Nrip1	0.000885968	0.000885968	1.5316	1.5316	T_Group up vs C_Group	37.1826	2.10843	0.340229	1
Cldn4	0.000890424	0.000890424	0.367648	-2.71999	T_Group down vs C_Group	37.1118	5.76585	0.932184	1
Pgrmc2	0.000891516	0.000891516	1.59578	1.59578	T_Group up vs C_Group	37.0946	1786.35	288.941	1
Pdxp	0.000892336	0.000892336	8.71101	8.71101	T_Group up vs C_Group	37.0816	2.3826	0.385517	1
Hmgcs2	0.0009008	0.0009008	1.50432	1.50432	T_Group up vs C_Group	36.9489	215541	35000.9	1
Fmo1	0.000902379	0.000902379	0.628154	-1.59197	T_Group down vs C_Group	36.9243	722.793	117.45	1
Fam82a1	0.000902697	0.000902697	1.27135	1.27135	T_Group up vs C_Group	36.9193	40.8859	6.64463	1
Acpp	0.000905539	0.000905539	2.81661	2.81661	T_Group up vs C_Group	36.8753	179.529	29.2113	1
Litaf	0.000906115	0.000906115	1.24284	1.24284	T_Group up vs C_Group	36.8664	125.306	20.3935	1
Pex3	0.000907053	0.000907053	1.34422	1.34422	T_Group up vs C_Group	36.8519	4.46118	0.726342	1
Slc34a2	0.000913783	0.000913783	5.02462	5.02462	T_Group up vs C_Group	36.7485	417.654	68.1913	1
Rpl23a	0.000918029	0.000918029	0.677985	-1.47496	T_Group down vs C_Group	36.6837	451.657	73.8732	1
Plce1	0.000919813	0.000919813	1.88534	1.88534	T_Group up vs C_Group	36.6567	1.12364	0.183919	1
Pon1	0.000935055	0.000935055	0.811889	-1.2317	T_Group down vs C_Group	36.4282	43140	7105.49	1
Ech1	0.00094082	0.00094082	1.87916	1.87916	T_Group up vs C_Group	36.343	9632.47	1590.26	1
Mxi1	0.000942903	0.000942903	0.827159	-1.20896	T_Group down vs C_Group	36.3124	2.59307	0.42846	1
Qrich1	0.00097588	0.00097588	1.29057	1.29057	T_Group up vs C_Group	35.8399	6.4954	1.0874	1
Glud1	0.000979549	0.000979549	0.817981	-1.22252	T_Group down vs C_Group	35.7886	4061.82	680.969	1
Uqcr11	0.000981219	0.000981219	0.787869	-1.26925	T_Group down vs C_Group	35.7654	816.468	136.971	1
Stac3	0.000988676	0.000988676	1.95096	1.95096	T_Group up vs C_Group	35.6622	1614.7	271.666	1
Frzb	0.000996455	0.000996455	0.586618	-1.70469	T_Group down vs C_Group	35.5557	0.0773915	0.0130598	1
Cpb2	0.00100257	0.00100257	0.81085	-1.23327	T_Group down vs C_Group	35.4727	4953.61	837.873	1
Dock9	0.00100932	0.00100932	1.46878	1.46878	T_Group up vs C_Group	35.382	0.688949	0.116831	1
Bloc1s5	0.00100972	0.00100972	0.766309	-1.30496	T_Group down vs C_Group	35.3766	1.7327	0.293873	1
Sesn1	0.00101439	0.00101439	0.60053	-1.66519	T_Group down vs C_Group	35.3143	10.2293	1.73798	1
Aifm2	0.00101758	0.00101758	1.22416	1.22416	T_Group up vs C_Group	35.2719	1.57536	0.26798	1
Irs1	0.00101804	0.00101804	1.68779	1.68779	T_Group up vs C_Group	35.2658	14.714	2.50339	1
Cdc73	0.00102044	0.00102044	1.2922	1.2922	T_Group up vs C_Group	35.2341	1.06539	0.181425	1
Naglt1	0.00102088	0.00102088	1.64701	1.64701	T_Group up vs C_Group	35.2283	0.530425	0.0903408	1
Dnajb2	0.00102237	0.00102237	0.771509	-1.29616	T_Group down vs C_Group	35.2086	27.1814	4.63206	1
Rps29	0.00102378	0.00102378	0.630592	-1.58581	T_Group down vs C_Group	35.1901	11074.4	1888.22	1
Chmp5	0.00102597	0.00102597	0.831553	-1.20257	T_Group down vs C_Group	35.1613	32.7953	5.59626	1
Sarm1	0.00103168	0.00103168	2.74231	2.74231	T_Group up vs C_Group	35.0868	0.577728	0.098794	1
Slc25a20	0.00103276	0.00103276	1.26643	1.26643	T_Group up vs C_Group	35.0728	665.99	113.933	1
Ccz1	0.00103913	0.00103913	0.892291	-1.12071	T_Group down vs C_Group	34.9904	1.72879	0.296445	1
Cpt1a	0.00104487	0.00104487	1.57003	1.57003	T_Group up vs C_Group	34.9168	2927.44	503.043	1
Gstm5	0.00104507	0.00104507	0.418352	-2.39033	T_Group down vs C_Group	34.9142	1.73079	0.297436	1
Cfi	0.00104816	0.00104816	0.763577	-1.30963	T_Group down vs C_Group	34.8747	18581.5	3196.83	1
LOC680039	0.00105455	0.00105455	1.54294	1.54294	T_Group up vs C_Group	34.7938	4.82642	0.83229	1
Slc2a1	0.00105926	0.00105926	0.383134	-2.61005	T_Group down vs C_Group	34.7345	2.52932	0.436911	1
Rere	0.00106219	0.00106219	1.52214	1.52214	T_Group up vs C_Group	34.6978	4.02502	0.696013	1
Galnt4	0.00106492	0.00106492	1.44196	1.44196	T_Group up vs C_Group	34.6636	2.37358	0.410849	1
Mtmr7	0.0010699	0.0010699	2.85825	2.85825	T_Group up vs C_Group	34.6018	5.35101	0.927874	1
Rps15a	0.00107458	0.00107458	0.648001	-1.54321	T_Group down vs C_Group	34.544	394.481	68.5181	1
Gabarap	0.00107746	0.00107746	0.785737	-1.27269	T_Group down vs C_Group	34.5085	788.635	137.12	1
Cby1	0.00107764	0.00107764	0.685235	-1.45935	T_Group down vs C_Group	34.5063	2.95922	0.514553	1
Rlim	0.0010786	0.0010786	1.31969	1.31969	T_Group up vs C_Group	34.4945	2.63673	0.458635	1
Alkbh8	0.00109132	0.00109132	1.60926	1.60926	T_Group up vs C_Group	34.3398	0.365083	0.0637889	1
Prkci	0.00109337	0.00109337	1.39616	1.39616	T_Group up vs C_Group	34.3152	7.70585	1.34737	1
Cmas	0.00109481	0.00109481	0.835857	-1.19638	T_Group down vs C_Group	34.2979	19.6112	3.43075	1
Glo1	0.00109805	0.00109805	0.788273	-1.2686	T_Group down vs C_Group	34.259	163.022	28.5511	1
Synpo	0.00110421	0.00110421	2.33005	2.33005	T_Group up vs C_Group	34.1856	1.44152	0.253005	1
Creld1	0.00111233	0.00111233	0.768318	-1.30154	T_Group down vs C_Group	34.0895	13.2779	2.337	1
Sfmbt1	0.00111987	0.00111987	0.83907	-1.1918	T_Group down vs C_Group	34.0013	0.847129	0.149488	1
Slc35g1	0.00112548	0.00112548	2.05119	2.05119	T_Group up vs C_Group	33.9361	8.28279	1.46442	1
Pink1	0.00112575	0.00112575	0.765878	-1.30569	T_Group down vs C_Group	33.933	80.6844	14.2666	1
Ethe1	0.00112595	0.00112595	1.43567	1.43567	T_Group up vs C_Group	33.9307	571.292	101.022	1
Trappc6a	0.0011324	0.0011324	0.741204	-1.34916	T_Group down vs C_Group	33.8563	63.5215	11.2573	1
Agpat6	0.00113613	0.00113613	1.68242	1.68242	T_Group up vs C_Group	33.8136	239.342	42.4696	1
Etfb	0.00114085	0.00114085	0.705194	-1.41805	T_Group down vs C_Group	33.7597	4850.23	862.013	1
Epha2	0.00114352	0.00114352	3.01936	3.01936	T_Group up vs C_Group	33.7294	150.933	26.849	1
Arl4a	0.00114679	0.00114679	0.601564	-1.66233	T_Group down vs C_Group	33.6924	14.9363	2.65988	1
Rpl29	0.00114707	0.00114707	0.650034	-1.53838	T_Group down vs C_Group	33.6893	530.313	94.4479	1
Ccdc53	0.00114835	0.00114835	0.766509	-1.30462	T_Group down vs C_Group	33.6748	21.07	3.75415	1
Pde8a	0.00115412	0.00115412	1.25601	1.25601	T_Group up vs C_Group	33.6099	6.52743	1.16527	1
Fcgrt	0.00115749	0.00115749	0.792753	-1.26143	T_Group down vs C_Group	33.5724	328.435	58.6974	1
Nedd4l	0.00116062	0.00116062	1.3336	1.3336	T_Group up vs C_Group	33.5375	12.6242	2.25853	1
Rpl23	0.0011692	0.0011692	0.656103	-1.52415	T_Group down vs C_Group	33.4426	2714.68	487.046	1
Klkb1	0.00117066	0.00117066	0.596954	-1.67517	T_Group down vs C_Group	33.4266	2588.5	464.631	1
Polg2	0.00118082	0.00118082	0.542411	-1.84362	T_Group down vs C_Group	33.3155	52.6501	9.48208	1
Fbxo21	0.0011832	0.0011832	1.64348	1.64348	T_Group up vs C_Group	33.2897	48.6407	8.76678	1
Pqlc1	0.00118885	0.00118885	0.780409	-1.28138	T_Group down vs C_Group	33.2287	123.253	22.2553	1
Sec11a	0.00118994	0.00118994	0.776267	-1.28822	T_Group down vs C_Group	33.217	84.7892	15.3155	1
Mat2b	0.00120181	0.00120181	0.857004	-1.16686	T_Group down vs C_Group	33.0902	5.4433	0.986991	1
Adk	0.00120354	0.00120354	1.11974	1.11974	T_Group up vs C_Group	33.0719	485.926	88.158	1
Utp23	0.00120529	0.00120529	0.672929	-1.48604	T_Group down vs C_Group	33.0534	2.94181	0.53401	1
Slc17a1	0.00120532	0.00120532	0.702966	-1.42254	T_Group down vs C_Group	33.0531	65.0833	11.8143	1
Fads6	0.00121019	0.00121019	0.65588	-1.52467	T_Group down vs C_Group	33.0018	257.032	46.7306	1
Psma6	0.00121376	0.00121376	0.807034	-1.23911	T_Group down vs C_Group	32.9643	123.828	22.5385	1
Plk2	0.00121514	0.00121514	1.79769	1.79769	T_Group up vs C_Group	32.9498	86.2888	15.7127	1
Cep44	0.00121571	0.00121571	1.43166	1.43166	T_Group up vs C_Group	32.9439	2.6925	0.490379	1
Slc37a4	0.00121622	0.00121622	0.7896	-1.26646	T_Group down vs C_Group	32.9386	455.042	82.8892	1
Lamtor4	0.0012211	0.0012211	0.634611	-1.57577	T_Group down vs C_Group	32.8878	766.704	139.876	1
Mfge8	0.00122528	0.00122528	0.701225	-1.42608	T_Group down vs C_Group	32.8444	59.8873	10.9402	1
Paqr9	0.00122704	0.00122704	2.17979	2.17979	T_Group up vs C_Group	32.8262	3553.75	649.557	1
Tnrc18	0.00123019	0.00123019	1.54473	1.54473	T_Group up vs C_Group	32.7939	4.59533	0.840767	1
Atp8b2	0.00123044	0.00123044	1.30477	1.30477	T_Group up vs C_Group	32.7913	5.57765	1.02057	1
Notch2	0.00123465	0.00123465	2.02004	2.02004	T_Group up vs C_Group	32.7481	4.80029	0.879495	1
Trdn	0.00124935	0.00124935	0.148682	-6.72577	T_Group down vs C_Group	32.5988	0.00192681	0.000354641	1
Galm	0.00125008	0.00125008	0.674277	-1.48307	T_Group down vs C_Group	32.5915	340.964	62.7706	1
Pdia5	0.00125386	0.00125386	0.754385	-1.32558	T_Group down vs C_Group	32.5535	40.3819	7.44287	1
Flrt1	0.00126404	0.00126404	1.53596	1.53596	T_Group up vs C_Group	32.4519	0.191847	0.0354703	1
Slc10a6	0.00127169	0.00127169	0.346096	-2.88937	T_Group down vs C_Group	32.3765	0.156502	0.0290028	1
Mrpl27	0.00128679	0.00128679	0.645246	-1.5498	T_Group down vs C_Group	32.229	277.795	51.7164	1
Stard13	0.00129265	0.00129265	1.50037	1.50037	T_Group up vs C_Group	32.1724	16.6894	3.11249	1
Gtf2h5	0.00129349	0.00129349	0.759615	-1.31646	T_Group down vs C_Group	32.1643	3.06618	0.571971	1
Lonp2	0.00129469	0.00129469	1.65564	1.65564	T_Group up vs C_Group	32.1528	1000.47	186.697	1
N5	0.00130251	0.00130251	2.73811	2.73811	T_Group up vs C_Group	32.078	0.568083	0.106256	1
Ndufb11	0.00130499	0.00130499	0.763549	-1.30967	T_Group down vs C_Group	32.0544	401.415	75.1376	1
Aldh3a2	0.001306	0.001306	1.49901	1.49901	T_Group up vs C_Group	32.0448	4965.67	929.761	1
Psmd8	0.00131034	0.00131034	0.774885	-1.29051	T_Group down vs C_Group	32.0037	235.162	44.0878	1
Rer1	0.00131635	0.00131635	0.87997	-1.1364	T_Group down vs C_Group	31.9471	36.1388	6.78725	1
Prkcsh	0.00132104	0.00132104	0.834233	-1.19871	T_Group down vs C_Group	31.9031	90.9764	17.1099	1
Ppp2r2d	0.00132234	0.00132234	1.91621	1.91621	T_Group up vs C_Group	31.891	74.1899	13.9582	1
Ndufs4	0.00133114	0.00133114	0.742487	-1.34683	T_Group down vs C_Group	31.8091	36.133	6.81558	1
Trim71	0.00134253	0.00134253	?	?	No change between T_Group and C_Group	31.7043	0.00135104	0.000255683	1
Pank1	0.00134405	0.00134405	1.41799	1.41799	T_Group up vs C_Group	31.6904	730.018	138.216	1
Cbx3	0.00135372	0.00135372	0.613205	-1.63078	T_Group down vs C_Group	31.6024	2.82893	0.537097	1
Fbxl20	0.00135612	0.00135612	1.22127	1.22127	T_Group up vs C_Group	31.5808	1.23883	0.235364	1
Cd320	0.00135774	0.00135774	0.674944	-1.4816	T_Group down vs C_Group	31.5662	17.5491	3.33568	1
Etv6	0.00135922	0.00135922	4.12763	4.12763	T_Group up vs C_Group	31.5528	71.7063	13.6355	1
Lrfn4	0.00136273	0.00136273	1.92343	1.92343	T_Group up vs C_Group	31.5213	1.64567	0.31325	1
Tbcb	0.00136468	0.00136468	0.68025	-1.47005	T_Group down vs C_Group	31.5038	71.847	13.6835	1
Mrps24	0.00136818	0.00136818	0.754575	-1.32525	T_Group down vs C_Group	31.4725	36.8828	7.03144	1
Vamp8	0.00137517	0.00137517	0.754618	-1.32517	T_Group down vs C_Group	31.4103	233.005	44.5085	1
Gnb2l1	0.00137792	0.00137792	0.71308	-1.40237	T_Group down vs C_Group	31.386	2010.95	384.43	1
Tssc4	0.00137926	0.00137926	1.28742	1.28742	T_Group up vs C_Group	31.3741	15.2374	2.914	1
Rps24	0.00138099	0.00138099	0.623633	-1.60351	T_Group down vs C_Group	31.3589	359.61	68.8053	1
2005-03-01	0.00139242	0.00139242	1.2051	1.2051	T_Group up vs C_Group	31.2587	29.6771	5.69643	1
Dexi	0.0013925	0.0013925	1.63645	1.63645	T_Group up vs C_Group	31.258	486.447	93.3739	1
Sbno2	0.00139491	0.00139491	1.52432	1.52432	T_Group up vs C_Group	31.237	7.86487	1.51068	1
Itsn1	0.00139994	0.00139994	1.63678	1.63678	T_Group up vs C_Group	31.1934	13.3238	2.5628	1
Tp53inp2	0.0014089	0.0014089	1.2713	1.2713	T_Group up vs C_Group	31.1162	564.082	108.769	1
Hipk2	0.00141148	0.00141148	1.39699	1.39699	T_Group up vs C_Group	31.0941	13.8069	2.66422	1
Cox7a2l	0.00141545	0.00141545	0.810107	-1.2344	T_Group down vs C_Group	31.0602	73.6976	14.2364	1
Gpx4	0.0014223	0.0014223	0.793321	-1.26052	T_Group down vs C_Group	31.002	1743.76	337.48	1
Ascc1	0.00142257	0.00142257	0.815296	-1.22655	T_Group down vs C_Group	30.9996	2.96636	0.574141	1
LOC252890	0.00142942	0.00142942	0.353454	-2.82922	T_Group down vs C_Group	30.9418	305.942	59.3259	1
Cacna2d4	0.0014374	0.0014374	2.50384	2.50384	T_Group up vs C_Group	30.8749	2.25054	0.437353	1
Yeats2	0.0014375	0.0014375	1.36498	1.36498	T_Group up vs C_Group	30.8741	1.04055	0.202218	1
Hint2	0.00143842	0.00143842	0.726448	-1.37656	T_Group down vs C_Group	30.8664	478.343	92.9831	1
Nfrkb	0.00144656	0.00144656	1.38402	1.38402	T_Group up vs C_Group	30.7987	1.65182	0.321797	1
Rybp	0.00144685	0.00144685	1.41939	1.41939	T_Group up vs C_Group	30.7962	3.80639	0.741596	1
Phlpp2	0.00144784	0.00144784	1.49331	1.49331	T_Group up vs C_Group	30.7881	0.455238	0.088717	1
Cfd	0.00145331	0.00145331	0.584584	-1.71062	T_Group down vs C_Group	30.743	33.0736	6.45486	1
Cyp2c12	0.00145399	0.00145399	0.661071	-1.5127	T_Group down vs C_Group	30.7374	309.406	60.3968	1
Ttc5	0.0014549	0.0014549	0.714643	-1.3993	T_Group down vs C_Group	30.7298	0.599185	0.116991	1
Slc2a2	0.0014559	0.0014559	0.774146	-1.29175	T_Group down vs C_Group	30.7217	660.742	129.044	1
Cpsf2	0.00145609	0.00145609	1.52322	1.52322	T_Group up vs C_Group	30.7201	5.55388	1.08474	1
Pxmp4	0.00147553	0.00147553	1.83746	1.83746	T_Group up vs C_Group	30.5618	996.669	195.67	1
Tmem66	0.00149115	0.00149115	0.83986	-1.19067	T_Group down vs C_Group	30.4367	125.607	24.7609	1
Sugt1	0.00149521	0.00149521	0.850643	-1.17558	T_Group down vs C_Group	30.4045	4.81448	0.950087	1
Il33	0.00149636	0.00149636	0.537242	-1.86136	T_Group down vs C_Group	30.3953	179.172	35.3683	1
Mrpl36	0.00150246	0.00150246	0.709423	-1.4096	T_Group down vs C_Group	30.3471	33.9501	6.71235	1
Spata13	0.00150367	0.00150367	1.57629	1.57629	T_Group up vs C_Group	30.3377	2.90534	0.574601	1
Samd5	0.00151141	0.00151141	1.57248	1.57248	T_Group up vs C_Group	30.277	0.0324955	0.00643963	1
Sh2d4a	0.00151151	0.00151151	0.630168	-1.58688	T_Group down vs C_Group	30.2762	43.9427	8.70836	1
Fnbp1l	0.00151878	0.00151878	1.34762	1.34762	T_Group up vs C_Group	30.2195	1.34747	0.267535	1
Arhgef12	0.00152768	0.00152768	1.26259	1.26259	T_Group up vs C_Group	30.1508	12.9175	2.57058	1
Whsc1l1	0.00154713	0.00154713	1.29644	1.29644	T_Group up vs C_Group	30.0022	0.876533	0.175294	1
Kng2	0.00154939	0.00154939	0.706311	-1.41581	T_Group down vs C_Group	29.9851	8725.6	1745.99	1
Net1	0.00155194	0.00155194	0.454958	-2.19801	T_Group down vs C_Group	29.9659	475.657	95.2397	1
Vom2r46	0.00156156	0.00156156	?	?	No change between T_Group and C_Group	29.8936	0.00601125	0.00120653	1
Tnfrsf1b	0.00156477	0.00156477	1.74704	1.74704	T_Group up vs C_Group	29.8696	75.9991	15.2662	1
Ngfrap1	0.0015736	0.0015736	0.653698	-1.52976	T_Group down vs C_Group	29.804	1.50978	0.303942	1
Cox6a1	0.00157941	0.00157941	0.768296	-1.30158	T_Group down vs C_Group	29.7611	4383.4	883.719	1
Tm4sf4	0.00158106	0.00158106	0.760225	-1.3154	T_Group down vs C_Group	29.7489	1079.6	217.742	1
Slc22a4	0.00159329	0.00159329	1.46769	1.46769	T_Group up vs C_Group	29.6594	2.1426	0.433441	1
Paip2	0.00159365	0.00159365	0.868703	-1.15114	T_Group down vs C_Group	29.6568	7.6286	1.54338	1
Etnk2	0.00159426	0.00159426	0.742013	-1.34769	T_Group down vs C_Group	29.6524	330.337	66.842	1
Pfkm	0.00160174	0.00160174	0.656951	-1.52218	T_Group down vs C_Group	29.5981	0.205873	0.0417337	1
Ngly1	0.00160344	0.00160344	1.27049	1.27049	T_Group up vs C_Group	29.5858	26.0971	5.29249	1
Gcsh	0.0016048	0.0016048	0.791061	-1.26412	T_Group down vs C_Group	29.576	267.061	54.178	1
